# Supplementary material for: Calculating the chemical mechanism of nitrogenase: new working hypotheses
Source: Royal Society of Chemistry journal article supplement (doi:10.1039/d2dt01920e), 2022-01-01
Supplement: d2dt01920e1.pdf [file d2dt01920e1.pdf]

## Calculating the chemical mechanism of nitrogenase: new working hypotheses.

Ian Dance

School of Chemistry, UNSW Sydney, NSW 2051, Australia

[i.dance@unsw.edu.au](mailto:i.dance@unsw.edu.au)

### Supplementary Information

Figure S1

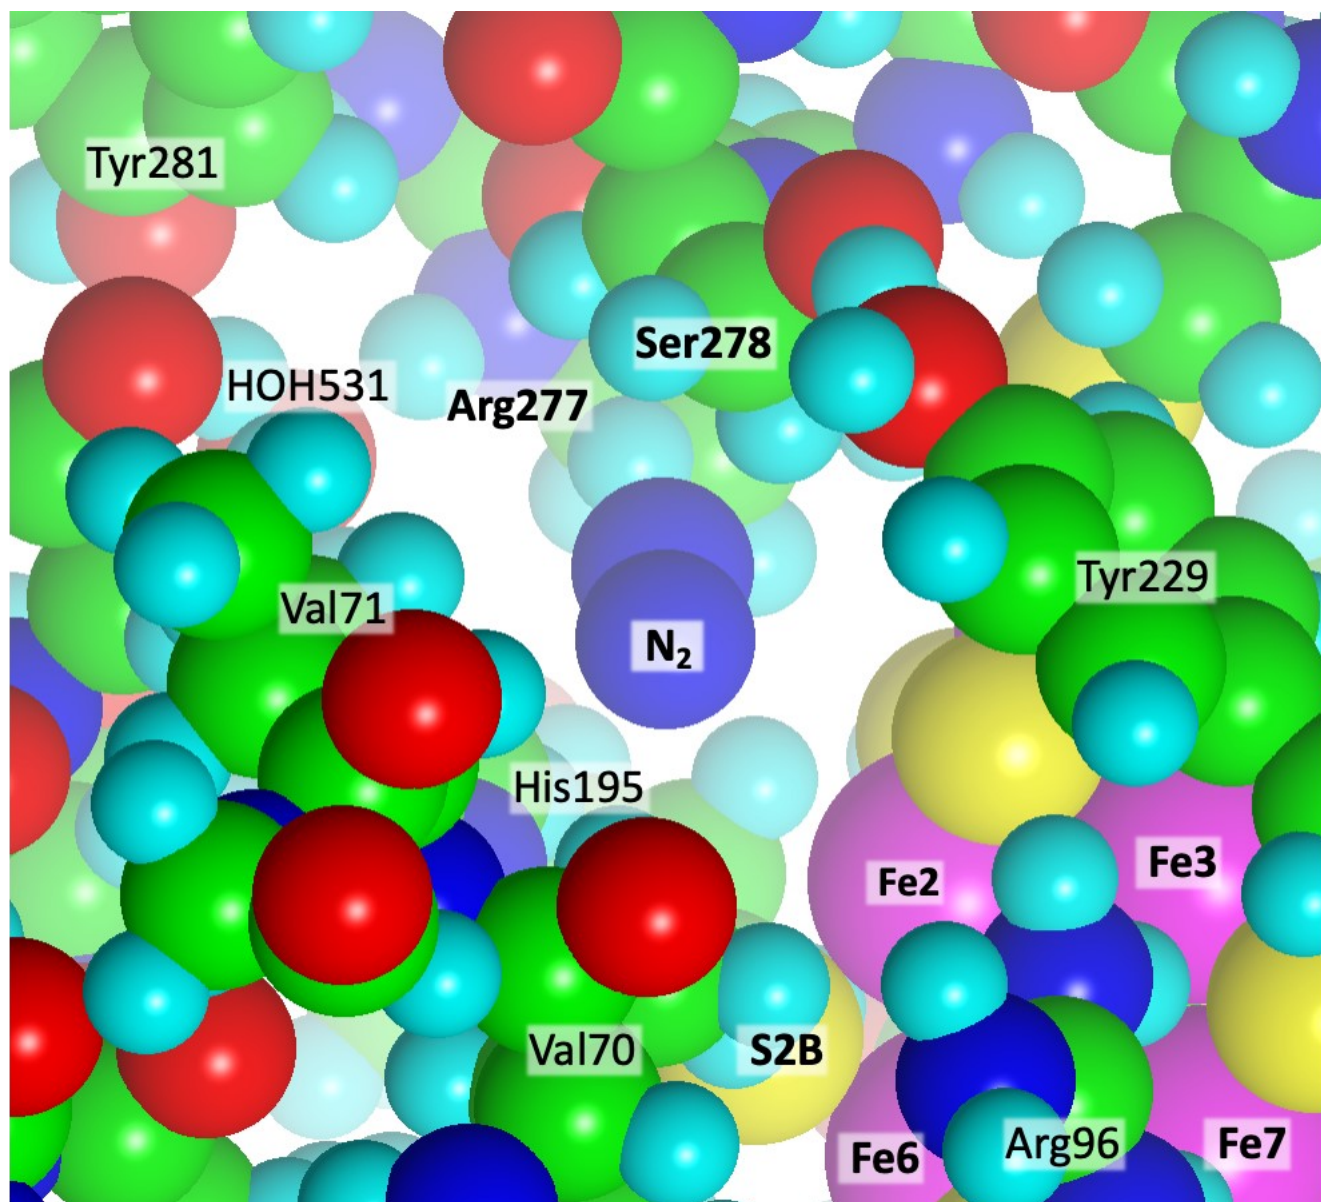

Figure S1.  $N_2$  located in the  $N_2$  ingress channel, engaging van der Waals contacts only with H atoms of Ser278 and Arg277. At this point  $N_2$  is 3.5Å from Fe2 and not oriented for end-on bonding to Fe2. This is the ‘dissociated’ position for the calculated trajectory of end-on bonding to Fe2.

**Atomic coordinates and Fe spin populations for the associated and dissociated forms, and the transition state between them, for structures A, B, C, D in different electronic and spin states.**

Translation of Fe numbering

- Fe1 = Fe143
- Fe2 = Fe140
- Fe3 = Fe141
- Fe4 = Fe142
- Fe5 = Fe139
- Fe6 = Fe145
- Fe7 = Fe144

**Structure A, 47(3/2)**

| structure, spin densities | filename, coordinates |              |                            |
|---------------------------|-----------------------|--------------|----------------------------|
| A, 47(3/2)                | bm22n2xd47tg.car 2    |              |                            |
| associated                | C1                    | -1.849563959 | -7.327444774 -5.712627250  |
|                           | C2                    | -0.964308062 | -7.592316043 -6.934285509  |
| Fe( 139) 0.541 2.342      | C3                    | -4.152604957 | -7.153505418 -4.870842651  |
| Fe( 140) 0.435 -1.635     | C4                    | -4.065044420 | -8.073349296 -3.654725683  |
| Fe( 141) 0.582 2.882      | C5                    | -3.507062376 | -10.286099705 -2.782801511 |
| Fe( 142) 0.555 -2.602     | C6                    | -2.332545618 | -9.949578043 -1.856512864  |
| Fe( 143) 0.563 2.927      | C7                    | -0.156945358 | -8.845875573 -1.637496793  |
| Fe( 144) 0.503 -2.193     | C8                    | -0.514429081 | -7.627808072 -0.781623677  |
| Fe( 145) 0.466 -0.209     | C9                    | -1.743137061 | -5.531026164 -0.603234763  |
|                           | C10                   | -2.687550289 | -5.925228730 0.541672634   |
|                           | C11                   | -4.532087733 | -7.309907380 1.297857242   |
|                           | C12                   | -3.884522812 | -8.121135579 2.427384411   |
|                           | C13                   | -2.455470748 | -10.015761661 3.017284636  |
|                           | C14                   | -1.185998413 | -9.567875543 3.753747678   |
|                           | C15                   | 0.964856052  | -8.389241345 3.594984221   |
|                           | C16                   | 1.153017092  | -6.925106814 4.004265606   |
|                           | C17                   | 0.193388578  | -4.639160479 3.944738681   |
|                           | C18                   | -0.894916600 | -4.267241250 4.969160068   |
|                           | C19                   | 0.153970100  | -3.773712196 2.656573306   |
|                           | C20                   | -0.003070474 | -2.282996389 2.975743184   |
|                           | C21                   | 1.403234687  | -4.026839309 1.804982954   |
|                           | C22                   | -3.304255412 | -4.167131634 5.479664482   |
|                           | C23                   | -3.480572542 | -5.242428728 6.567717962   |
|                           | C24                   | -4.599248826 | -3.918595092 4.670879737   |
|                           | C25                   | -5.804905246 | -3.719574379 5.596960485   |
|                           | C26                   | -4.434004738 | -2.709769285 3.739989536   |
|                           | C27                   | -3.755022567 | -7.589301883 7.114626313   |
|                           | C28                   | -2.731002515 | -7.593649452 8.232811926   |
|                           | C29                   | 10.724075572 | -7.538983352 3.234598733   |
|                           | C30                   | 10.418241045 | -6.050343452 3.406351616   |
|                           | C31                   | 8.855204216  | -4.470542388 4.556940827   |
|                           | C32                   | 9.196114993  | -4.220565871 6.039486947   |
|                           | C33                   | 7.339381614  | -4.395707446 4.299432449   |
|                           | C34                   | 6.719944852  | -3.028802593 4.606858443   |
|                           | C35                   | 5.286527150  | -2.954662508 4.078803489   |
|                           | C36                   | 3.475032652  | -1.396111251 4.828382324   |
|                           | C37                   | 10.248639102 | -2.693152230 7.639012399   |
|                           | C38                   | 9.411896739  | -1.608299867 8.285138663   |
|                           | C39                   | -1.262526617 | -2.924296418 -5.239123510  |
|                           | C40                   | -2.629428834 | -2.415131417 -4.753523200  |
|                           | C41                   | -0.193194686 | -2.413592712 -4.248417292  |
|                           | C42                   | 1.195641867  | -3.074494149 -4.358408020  |
|                           | C43                   | 2.158347258  | -2.420310681 -5.348517133  |
|                           | C44                   | -4.293187606 | -0.644941769 -5.072724523  |
|                           | C45                   | -5.628028120 | -1.393149604 -5.103586279  |
|                           | C46                   | -4.421729793 | 0.689143729 -5.836418685   |
|                           | C47                   | -6.818804825 | -3.466377371 -5.593745855  |
|                           | C48                   | -7.001348846 | -4.089795558 -4.203113274  |
|                           | C49                   | -6.000534624 | -4.537275568 -2.001843581  |
|                           | C50                   | -5.924142787 | -3.533416247 -0.853662034  |
|                           | C51                   | -5.881036669 | -1.176650526 -0.152867589  |
|                           | C52                   | -7.257636160 | -0.894110432 0.495244594   |
|                           | C53                   | -5.390564405 | 0.171925496 -0.700054194   |

|      |               |              |              |
|------|---------------|--------------|--------------|
| C54  | -3.970656118  | 0.240494094  | -1.165148362 |
| C55  | -2.832727187  | -0.474173894 | -0.878838070 |
| C56  | -2.250995505  | 1.197556739  | -2.218597840 |
| C57  | -9.673081448  | -0.710273365 | 0.058305992  |
| C58  | -10.127225700 | -1.402148388 | 1.338592301  |
| C59  | -10.619764978 | -1.082056471 | -1.113617326 |
| C60  | -11.913718105 | -0.327507025 | -1.173856486 |
| C61  | -12.952816982 | -0.254762978 | -0.265170079 |
| C62  | -13.407842485 | 0.967194830  | -2.056360949 |
| C63  | 4.195208764   | 2.074680329  | 8.712038902  |
| C64  | 5.680106891   | 1.764412870  | 8.750454933  |
| C65  | 3.639020890   | 1.418030666  | 7.420476471  |
| C66  | 2.150346062   | 1.608178653  | 7.250068009  |
| C67  | 1.227004292   | 0.713216118  | 7.819884245  |
| C68  | 1.643325724   | 2.688709035  | 6.504157370  |
| C69  | -0.152701819  | 0.882272361  | 7.652622035  |
| C70  | 0.270812249   | 2.875087532  | 6.335292589  |
| C71  | -0.626501086  | 1.969478055  | 6.906925812  |
| C72  | -0.721927566  | 7.698060615  | 4.882751011  |
| C73  | -2.051767622  | 8.185958852  | 4.293430549  |
| C74  | -0.375941025  | 6.309532331  | 4.323830073  |
| C75  | -3.155321001  | 9.759006287  | 2.765353110  |
| C76  | -3.769759118  | 8.876070766  | 1.679275461  |
| C77  | -3.466452861  | 6.938256249  | 0.183402452  |
| C78  | -4.192773180  | 5.733808803  | 0.820166966  |
| C79  | -2.289624718  | 6.521967713  | -0.718917893 |
| C80  | -2.595067548  | 5.578017393  | -1.886282281 |
| C81  | -3.388423904  | 6.162786913  | -3.071625914 |
| C82  | -5.808391153  | 6.787898578  | -2.902401916 |
| C83  | -4.366415456  | 4.143935667  | 2.667015074  |
| C84  | -5.552520914  | 4.577313770  | 3.554032716  |
| C85  | -3.413194642  | 3.294690819  | 3.514429057  |
| C86  | -6.354064990  | 6.209846441  | 5.193291892  |
| C87  | -7.671272758  | 6.934741679  | 4.925399419  |
| C88  | -9.208796560  | 7.877438946  | 3.242954047  |
| C89  | -10.521481708 | 7.082831374  | 3.064395785  |
| C90  | -8.914678628  | 8.722634397  | 1.979876635  |
| C91  | -8.591477219  | 7.839584967  | 0.781493735  |
| C92  | -11.547559153 | 4.857993508  | 2.828275098  |
| C93  | -12.499218911 | 4.825030457  | 4.022159913  |
| C94  | -11.060947308 | 3.420098703  | 2.499831118  |
| C95  | -10.231254977 | 3.361418893  | 1.237863966  |
| C96  | -10.843944025 | 3.218173580  | -0.015717856 |
| C97  | -8.833082742  | 3.486082398  | 1.282197111  |
| C98  | -10.092413712 | 3.226178788  | -1.193256208 |
| C99  | -8.065406973  | 3.519430336  | 0.115360212  |
| C100 | -8.709930374  | 3.397474220  | -1.113816242 |
| C101 | 7.961226231   | 4.802229026  | -5.204688650 |
| C102 | 6.704217260   | 4.064625048  | -5.640032592 |
| C103 | 4.321371919   | 3.634504649  | -5.084926197 |
| C104 | 3.220329813   | 4.658860909  | -5.383974775 |
| C105 | 1.831769707   | 6.437325236  | -4.420338160 |
| C106 | 1.992150730   | 7.656594772  | -3.516232540 |
| C107 | 2.914704783   | 8.702750985  | -1.527655313 |
| C108 | 3.560621128   | 9.939890108  | -2.116881678 |
| C109 | 3.105240529   | 2.375234107  | -9.371852899 |
| C110 | 1.575923399   | 2.478898283  | -9.437339783 |
| C111 | 3.510588242   | 1.303137543  | -8.332925614 |
| C112 | 4.979717241   | 0.874737522  | -8.516196960 |
| C113 | 5.446389911   | 0.057008248  | -7.332490684 |
| C114 | -0.465494233  | 3.443659520  | -8.482749232 |
| C115 | -0.836282636  | 4.903033016  | -8.289140025 |
| C116 | -1.174429186  | 2.460038852  | -7.519929106 |
| C117 | -0.500474073  | 2.367266212  | -6.173304551 |
| C118 | -0.729188657  | 3.329544787  | -5.174880286 |
| C119 | 0.450546205   | 1.362024436  | -5.928556910 |
| C120 | -0.000895094  | 3.299091133  | -3.979604275 |
| C121 | 1.177916866   | 1.333629625  | -4.733736925 |
| C122 | 0.961905489   | 2.309237721  | -3.757192106 |
| C123 | 10.822821960  | 2.212205684  | -0.500163277 |
| C124 | 11.432068785  | 2.046976699  | 0.901299248  |
| C125 | 10.040666129  | 0.960482755  | -0.933977494 |
| C126 | 9.259494011   | 1.077321751  | -2.207834137 |

|       |              |               |              |
|-------|--------------|---------------|--------------|
| C127  | 9.764438418  | 1.293351680   | -3.474825664 |
| C128  | 7.592816839  | 0.883205292   | -3.608133353 |
| C129  | 12.728040475 | 0.716405746   | 2.471106007  |
| C130  | 13.607364695 | 1.882203513   | 2.868485721  |
| C131  | 5.268838699  | -4.379836107  | -1.817928236 |
| C132  | 5.955110000  | -3.658353317  | -0.692030428 |
| C133  | 7.008987239  | -2.592770019  | -1.196561623 |
| C134  | 8.054464955  | -3.295423057  | -2.110633771 |
| C135  | 9.254098209  | -2.396956540  | -2.460958155 |
| C136  | 10.410799794 | -3.127570782  | -3.087174364 |
| C137  | 7.771379095  | -2.108550353  | 0.074664234  |
| C138  | 3.514755862  | 2.467089627   | 0.419156262  |
| Fe139 | 4.899110938  | 2.690885432   | -0.925949792 |
| Fe140 | 1.260204953  | 2.257165423   | 0.458168028  |
| Fe141 | 3.340691280  | 3.175970152   | 2.294790007  |
| Fe142 | 3.234673591  | 4.412971556   | 0.010431329  |
| Fe143 | 1.241040133  | 4.762429810   | 1.694860590  |
| Fe144 | 5.014295197  | 1.477013974   | 1.355052793  |
| Fe145 | 3.405554856  | 0.747426524   | -0.484555828 |
| H146  | 0.823468639  | -7.502763020  | -5.954702060 |
| H147  | 0.462104777  | -6.135439635  | -6.771708481 |
| H148  | -3.532257516 | -7.562717624  | -6.874090120 |
| H149  | -1.425947549 | -7.134124062  | -7.823457400 |
| H150  | -0.985415823 | -8.683225308  | -7.107172544 |
| H151  | -4.021251731 | -6.130085931  | -4.491039507 |
| H152  | -3.473881134 | -9.643609616  | -4.835988673 |
| H153  | -5.162490091 | -7.238280283  | -5.296146144 |
| H154  | -3.351339268 | -11.289980937 | -3.199130621 |
| H155  | -1.363319623 | -8.987636977  | -3.389992131 |
| H156  | -4.407649392 | -10.308593298 | -2.155814359 |
| H157  | -0.899737359 | -4.996856499  | -0.148513921 |
| H158  | -1.502128490 | -6.743225825  | -2.369529217 |
| H159  | 0.669288069  | -8.589740586  | -2.314605439 |
| H160  | -5.006092650 | -6.432389419  | 1.757047941  |
| H161  | -3.699465356 | -7.252686359  | -0.685723267 |
| H162  | 0.184898404  | -9.629871301  | -0.952180319 |
| H163  | -2.258074242 | -4.841641385  | -1.286926626 |
| H164  | -2.856277633 | -9.277547070  | 1.052811468  |
| H165  | -5.311242493 | -7.924280041  | 0.824778196  |
| H166  | 1.511786276  | -5.090437651  | 1.546896426  |
| H167  | 1.351578835  | -3.447045520  | 0.871699918  |
| H168  | 2.312958018  | -3.707022911  | 2.336845527  |
| H169  | -0.729503034 | -4.094101692  | 2.080297739  |
| H170  | -2.221312390 | -10.957017222 | 2.499383733  |
| H171  | -3.604809836 | -2.844818336  | 3.030936143  |
| H172  | -3.551657072 | -6.779154702  | 5.159093746  |
| H173  | -5.996813919 | -4.598978012  | 6.227889313  |
| H174  | -0.012970218 | -1.694841289  | 2.046319168  |
| H175  | 0.838169657  | -1.911087002  | 3.577980841  |
| H176  | 3.724101475  | 1.576807614   | 9.581648809  |
| H177  | -5.353720483 | -2.556461627  | 3.156949492  |
| H178  | -6.706760320 | -3.528527683  | 4.997127632  |
| H179  | -4.245309416 | -1.796753120  | 4.328259580  |
| H180  | -5.648338207 | -2.855964096  | 6.262137056  |
| H181  | -4.785518005 | -4.814062815  | 4.050734462  |
| H182  | -3.044095864 | -3.252665588  | 6.032858469  |
| H183  | -2.389149390 | -4.820970319  | 3.645197242  |
| H184  | -0.935198794 | -2.073331699  | 3.521747073  |
| H185  | -2.531604213 | 3.034789453   | 2.905068749  |
| H186  | -3.950362276 | 2.367393091   | 3.772482193  |
| H187  | -2.644347886 | 3.372323982   | 5.316852055  |
| H188  | -2.492957534 | 1.476282100   | 7.107060257  |
| H189  | -0.103001621 | 3.703335964   | 5.731956657  |
| H190  | 2.334547467  | 3.380490094   | 6.016885229  |
| H191  | 1.588119678  | -0.137342563  | 8.405890649  |
| H192  | -0.616411176 | -6.440684523  | 3.105970787  |
| H193  | 1.748966185  | -8.615984923  | 2.856727440  |
| H194  | 1.155926795  | -9.000247293  | 4.486805956  |
| H195  | -0.510173339 | -8.556645071  | 2.072646426  |
| H196  | -3.202404332 | -10.226893206 | 3.793066595  |
| H197  | -0.852578296 | 0.164967899   | 8.089335248  |
| H198  | 1.144874263  | -4.465968021  | 4.464833502  |
| H199  | -4.761849335 | -7.541352231  | 7.561479254  |

|      |               |              |               |
|------|---------------|--------------|---------------|
| H200 | -3.666026521  | -8.552445780 | 6.587015225   |
| H201 | -1.745212590  | -7.139769322 | 7.973582810   |
| H202 | 11.305324028  | -2.384981782 | 7.642831949   |
| H203 | 4.136884764   | -1.969780060 | -5.617030286  |
| H204 | 6.523666873   | -5.820654923 | -1.558946051  |
| H205 | 5.063603598   | 0.253635345  | -9.419385038  |
| H206 | 5.621787990   | 1.759064585  | -8.641370816  |
| H207 | 2.865885332   | 0.415397297  | -8.427135052  |
| H208 | -0.105846010  | 5.620915708  | -8.732949828  |
| H209 | 3.382050303   | 1.993502729  | -10.365783354 |
| H210 | -0.103973921  | -1.320833515 | -4.357086732  |
| H211 | 1.086604433   | -4.131040186 | -4.661412089  |
| H212 | 1.549193139   | 3.784543135  | -7.825274753  |
| H213 | -0.813090588  | 3.210989605  | -9.508655569  |
| H214 | 3.655629852   | 4.041446943  | -8.262117441  |
| H215 | 3.770890796   | -2.736194148 | -4.071197628  |
| H216 | 3.342192752   | 1.707715424  | -7.322925489  |
| H217 | 4.727157658   | 3.632414603  | -9.443773268  |
| H218 | -1.269643366  | -3.209185309 | -7.282576652  |
| H219 | -0.574702955  | -2.602165577 | -3.234266870  |
| H220 | 6.248906168   | 1.696483712  | -6.586233680  |
| H221 | 1.661531755   | -3.092749591 | -3.363137653  |
| H222 | -5.231746497  | -1.526504043 | 0.662235998   |
| H223 | -2.678165675  | -1.348044244 | -0.257319387  |
| H224 | -6.952097241  | -5.077122853 | -1.898609768  |
| H225 | -5.056821333  | -3.575223024 | -3.653639813  |
| H226 | -8.184840656  | -1.638366168 | -1.174099232  |
| H227 | -13.105018134 | -0.693363959 | 0.715430729   |
| H228 | -9.745193628  | -2.446896928 | 1.444971201   |
| H229 | -10.791530117 | -2.172041461 | -1.102224653  |
| H230 | -9.680928053  | 0.377670155  | 0.224133670   |
| H231 | -13.962077852 | 1.622174707  | -2.723048774  |
| H232 | -5.526433923  | 0.907884915  | 0.109580441   |
| H233 | -6.056114939  | 0.488142894  | -1.520615658  |
| H234 | -14.779629860 | 0.846112292  | -0.431693020  |
| H235 | -10.087136054 | -0.855878069 | -2.049664561  |
| H236 | -5.943342425  | -1.938904814 | -2.168502396  |
| H237 | -5.196670992  | -5.272547141 | -1.853589721  |
| H238 | -7.741463125  | -2.915358865 | -5.817496631  |
| H239 | -1.649392235  | 1.877155602  | -2.815390939  |
| H240 | -6.725548057  | -4.277464279 | -6.328179494  |
| H241 | 4.174025336   | 3.920600966  | 9.606242273   |
| H242 | 3.036869522   | 3.741716451  | 8.445832521   |
| H243 | -2.757171649  | 5.547061229  | 2.303075073   |
| H244 | -4.799054318  | 3.490297003  | 1.896401421   |
| H245 | -4.656793975  | 6.381384995  | 3.945454764   |
| H246 | -4.224219308  | 2.010777329  | -2.368925624  |
| H247 | -5.479261012  | 2.627182762  | -3.965879375  |
| H248 | -6.364129971  | 3.034668132  | -2.706711998  |
| H249 | -3.490115803  | 1.260479460  | -5.727264644  |
| H250 | -4.590477247  | 0.491908455  | -6.907989443  |
| H251 | -8.085670918  | 9.409154164  | 2.208240403   |
| H252 | -9.811956656  | 9.311954473  | 1.753069273   |
| H253 | -6.514169402  | 8.103228644  | 1.019955601   |
| H254 | -7.015439423  | 6.863124621  | -0.089787680  |
| H255 | -6.346794969  | 8.762453161  | -2.941541703  |
| H256 | -3.024191766  | 5.725655204  | -4.013201179  |
| H257 | -10.581535840 | 3.087964852  | -2.160748291  |
| H258 | -8.312698779  | 3.549846057  | 2.241760755   |
| H259 | -7.273770591  | 5.393809317  | -2.469344972  |
| H260 | -1.521034318  | 6.040797670  | -0.094340781  |
| H261 | -2.072086584  | 7.705360417  | 1.611332732   |
| H262 | -3.089004545  | 4.660543282  | -1.529140529  |
| H263 | -4.818180211  | -2.920024324 | -6.172782502  |
| H264 | -2.900267475  | 10.724846737 | 2.309634280   |
| H265 | -2.557379513  | -1.177527064 | -6.324789523  |
| H266 | -1.837650974  | 7.448553495  | -1.110542751  |
| H267 | -6.986206824  | 3.677523312  | 0.167067713   |
| H268 | -6.204758496  | 0.850245930  | -5.046981008  |
| H269 | -3.946923340  | 9.933977773  | 3.506879243   |
| H270 | -4.756581160  | 8.442297510  | -3.522277855  |
| H271 | -7.846114058  | 7.004387395  | -2.778011231  |
| H272 | -0.001781206  | -2.276052082 | -6.727207597  |

|      |               |              |              |
|------|---------------|--------------|--------------|
| H273 | -1.311371463  | -4.025339469 | -5.138156493 |
| H274 | -11.926686139 | 3.090438071  | -0.080334609 |
| H275 | -4.150415547  | -0.408481793 | -4.005955103 |
| H276 | -4.236972375  | 7.451418811  | -0.408350098 |
| H277 | -3.214291806  | 7.243703001  | -3.141357618 |
| H278 | -1.619023340  | 5.258113847  | -2.276875378 |
| H279 | -5.094797261  | 4.890285682  | -3.018915322 |
| H280 | -6.609172012  | 5.302070181  | 5.760281181  |
| H281 | -7.385844477  | 6.794320560  | 2.898634712  |
| H282 | -9.403706264  | 8.566860115  | 4.077931945  |
| H283 | -5.767007364  | 6.862726384  | 5.852919929  |
| H284 | -9.493295938  | 5.330602209  | 3.248720627  |
| H285 | 7.685837584   | 5.750745061  | -4.719500272 |
| H286 | 8.428884564   | 4.165810939  | -4.423738949 |
| H287 | 10.123941026  | 3.056440210  | -0.411508861 |
| H288 | 9.752763983   | 5.334124053  | -6.019221488 |
| H289 | 8.945355721   | 4.195961992  | -6.878978419 |
| H290 | 0.601083403   | 6.012305370  | 4.723623278  |
| H291 | -1.599840329  | 7.074377753  | 6.611884028  |
| H292 | -1.060573540  | 9.593994139  | 3.166726891  |
| H293 | -1.141239474  | 5.593107810  | 4.652671116  |
| H294 | -0.919945161  | 8.556032891  | 6.737769647  |
| H295 | 3.526279880   | 8.380958021  | -0.669492184 |
| H296 | 0.078771169   | 8.401836975  | 4.604395097  |
| H297 | 6.842804972   | -5.180365462 | 4.894014527  |
| H298 | 9.368706663   | -3.734541677 | 3.925561787  |
| H299 | 3.377139869   | 6.742989150  | -2.241538446 |
| H300 | 2.137175905   | 0.095970871  | 5.202650184  |
| H301 | 1.822839579   | 6.792981032  | -5.458000847 |
| H302 | 1.925497427   | 0.555176924  | -4.564632144 |
| H303 | 0.823109536   | 6.037600140  | -4.218477639 |
| H304 | 4.655109838   | -3.719542878 | 4.550037922  |
| H305 | 3.208520063   | 5.102769705  | -3.392188424 |
| H306 | 5.278889690   | -3.158402202 | 2.994696487  |
| H307 | 7.185250559   | -4.642518961 | 3.236279396  |
| H308 | 7.305915432   | -2.228189921 | 4.130009058  |
| H309 | 6.719510062   | -2.834776958 | 5.692077662  |
| H310 | -1.181576759  | 1.473073169  | -8.003550307 |
| H311 | 8.935495837   | -6.623034080 | 4.616525780  |
| H312 | 10.455272929  | -7.784721415 | 2.195573563  |
| H313 | 1.522630831   | 2.287287888  | -2.821207545 |
| H314 | 10.508422624  | -8.584423723 | 4.996647947  |
| H315 | 9.793643898   | -9.311770012 | 3.714326343  |
| H316 | 5.072284606   | -0.864888289 | 3.733115543  |
| H317 | -0.163530356  | 4.053116699  | -3.206447249 |
| H318 | 0.633544492   | 0.594831844  | -6.684892651 |
| H319 | 12.313008885  | -2.388736679 | 0.618524596  |
| H320 | 10.755605305  | 0.125862015  | -1.055238863 |
| H321 | 10.038073828  | -2.606802099 | 1.462063439  |
| H322 | 12.578294765  | -2.473964772 | -0.899217832 |
| H323 | 4.183480841   | 9.756269503  | -3.025638375 |
| H324 | 7.879097699   | -0.384974335 | 2.107262756  |
| H325 | 6.455344186   | -4.362484966 | -0.011150801 |
| H326 | 5.704642818   | 4.824395870  | -4.020502498 |
| H327 | 8.421835049   | -4.189194884 | -1.581037605 |
| H328 | 8.731369067   | 1.241641313  | -5.352263628 |
| H329 | 6.616160617   | 0.713779228  | -4.045385037 |
| H330 | 11.820593945  | -7.642562260 | 3.309343424  |
| H331 | 3.332524700   | 0.482629081  | 4.001835421  |
| H332 | 9.498083781   | -0.694884546 | 3.898894548  |
| H333 | 7.461185737   | 0.719355382  | 3.118232824  |
| H334 | 10.002455453  | -2.371165669 | 5.522164167  |
| H335 | 3.420303631   | -3.045950288 | 6.060013537  |
| H336 | 10.885488516  | -4.227975261 | -4.549664231 |
| H337 | 8.926280204   | -1.608138217 | -3.154319403 |
| H338 | 9.651562627   | -1.911369376 | -1.562887726 |
| H339 | 7.554774723   | -3.617528838 | -3.036184074 |
| H340 | 4.072119581   | 3.044151273  | -4.189928297 |
| H341 | -1.463431844  | 4.119894248  | -5.353556546 |
| H342 | -2.216116266  | 2.800663916  | -7.422251592 |
| H343 | 5.194457850   | -3.094586120 | -0.136223825 |
| H344 | 10.626232927  | -1.637104340 | 3.398773766  |
| H345 | 11.021364098  | -3.528020959 | 2.246878303  |

|       |               |              |              |
|-------|---------------|--------------|--------------|
| H346  | 1.954632475   | -2.136034559 | 6.002184278  |
| H347  | 10.770246771  | 1.510298749  | -3.812706472 |
| H348  | 9.356118922   | 0.666109645  | -0.128703706 |
| H349  | 4.403275827   | 2.966181543  | -5.944441509 |
| H350  | 1.917006147   | 8.964843981  | -1.144124517 |
| H351  | 3.878866140   | 0.345562002  | 7.469095857  |
| H352  | 4.168941140   | 1.841512117  | 6.553003442  |
| H353  | 12.290981833  | 3.466655847  | -1.195790968 |
| H354  | 12.597922420  | 1.890511438  | -1.500489153 |
| H355  | 13.378104077  | -0.172176429 | 2.417701624  |
| H356  | 12.178178485  | 0.130201562  | 0.496918214  |
| H357  | 14.034676872  | 2.464265575  | 2.018221591  |
| H358  | 11.977031202  | 0.531976057  | 3.256426171  |
| H359  | 6.309853542   | 2.476756710  | 8.163536967  |
| H360  | -12.059381022 | 5.176087341  | 4.986460456  |
| H361  | 10.152731309  | -3.593532959 | 8.270510839  |
| H362  | 8.370558459   | -1.509846821 | 7.893104974  |
| H363  | -12.116626839 | 5.250759114  | 1.970433566  |
| H364  | -10.481027189 | 3.036684279  | 3.354530058  |
| H365  | -11.956171239 | 2.788817846  | 2.403585244  |
| H366  | -8.512136920  | 3.346642836  | -3.051944124 |
| H367  | -0.760679510  | -0.039312563 | -1.402127462 |
| Mo368 | 6.074167808   | 0.252072795  | -0.801682887 |
| N369  | 0.418531789   | -7.155992261 | -6.828651732 |
| N370  | -3.190282161  | -7.447975209 | -5.923159057 |
| N371  | -3.674301709  | -9.350915476 | -3.882890436 |
| N372  | -1.271406284  | -9.333948772 | -2.435742413 |
| N373  | -1.273778464  | -6.672159330 | -1.376953067 |
| N374  | -3.595779857  | -6.891387734 | 0.265654532  |
| N375  | -3.010520781  | -9.087830717 | 2.046396313  |
| N376  | -0.334228792  | -8.760061951 | 3.060679395  |
| N377  | 0.161887983   | -6.068045213 | 3.646879900  |
| N378  | -2.185801972  | -4.481605506 | 4.588045590  |
| N379  | -3.519421368  | -6.533777846 | 6.150431418  |
| N380  | 9.968747397   | -8.404237917 | 4.147801112  |
| N381  | 9.353355256   | -5.790097812 | 4.187331457  |
| N382  | 4.677213303   | -1.634709713 | 4.282882236  |
| N383  | 2.874497764   | -2.318186195 | 5.611660027  |
| N384  | 2.834346925   | -0.251149822 | 4.545767250  |
| N385  | 9.813416514   | -3.041256950 | 6.299055556  |
| N386  | -1.011345043  | -2.480062491 | -6.614355715 |
| N387  | 3.451649708   | -2.376307836 | -4.972423234 |
| N388  | -3.156941432  | -1.423101707 | -5.520485014 |
| N389  | -5.667279452  | -2.589790265 | -5.719244588 |
| N390  | -5.947151255  | -3.984230945 | -3.343156681 |
| N391  | -5.922007005  | -2.203879114 | -1.185060964 |
| N392  | -3.574477627  | 1.270236125  | -2.008434221 |
| N393  | -1.789663288  | 0.134959856  | -1.551330971 |
| N394  | -8.330835158  | -1.156030039 | -0.291521231 |
| N395  | -12.212731953 | 0.440247959  | -2.289216224 |
| N396  | -13.889761014 | 0.574542733  | -0.842419382 |
| N397  | 4.011821447   | 3.528267012  | 8.675149722  |
| N398  | -0.771094053  | 7.619078166  | 6.351201767  |
| N399  | -1.974522314  | 9.224736413  | 3.414516644  |
| N400  | -2.988535561  | 7.895160576  | 1.177125539  |
| N401  | -4.829823566  | 5.889636826  | -3.009480880 |
| N402  | -5.568746023  | 8.112831446  | -3.009704378 |
| N403  | -7.060527808  | 6.383146658  | -2.608630222 |
| N404  | -3.695607541  | 5.250570201  | 1.990364775  |
| N405  | -5.525605728  | 5.847918652  | 4.049768922  |
| N406  | -8.054357879  | 7.067588342  | 3.621458349  |
| N407  | -7.274177013  | 7.527603904  | 0.638164564  |
| N408  | -10.413936467 | 5.731584862  | 3.087116370  |
| N409  | 8.825164978   | 5.068857634  | -6.357427988 |
| N410  | 5.609755989   | 4.284036985  | -4.886183923 |
| N411  | 2.827875881   | 5.385905934  | -4.316295925 |
| N412  | 2.853157153   | 7.596905718  | -2.470165590 |
| N413  | 3.730287508   | 3.695205710  | -9.226512850 |
| N414  | 0.981427453   | 3.308100803  | -8.533577279 |
| N415  | 11.849698433  | 2.590781697  | -1.490784390 |
| N416  | 7.891228404   | 0.826407728  | -2.313068569 |
| N417  | 8.699149200   | 1.168822539  | -4.339170296 |
| N418  | 12.127719184  | 0.903944016  | 1.160316863  |

|                 |                         |               |               |              |
|-----------------|-------------------------|---------------|---------------|--------------|
| N419            | -1.680500599            | 2.310098587   | 0.596358286   |              |
| N420            | -0.554790525            | 2.247918510   | 0.530361652   |              |
| O421            | -1.384653323            | -7.079834302  | -4.584688848  |              |
| O422            | -4.353827368            | -7.652952551  | -2.521743090  |              |
| O423            | -2.367516379            | -10.260556870 | -0.655091362  |              |
| O424            | -0.142368985            | -7.531733384  | 0.398451158   |              |
| O425            | -2.620038251            | -5.380236329  | 1.654917277   |              |
| O426            | -4.190733139            | -7.920307136  | 3.614885062   |              |
| O427            | -0.964990192            | -9.980533301  | 4.900298244   |              |
| O428            | 2.186106687             | -6.591974380  | 4.603260039   |              |
| O429            | -0.592537600            | -3.789538784  | 6.074080636   |              |
| O430            | -3.589134120            | -4.941168427  | 7.767781654   |              |
| O431            | -2.934606866            | -8.105262423  | 9.323206572   |              |
| O432            | 11.125913699            | -5.203661580  | 2.819120956   |              |
| O433            | 8.918187418             | -5.069922260  | 6.904097081   |              |
| O434            | 9.824724738             | -0.888892648  | 9.180867744   |              |
| O435            | -3.199533517            | -2.866448591  | -3.739314980  |              |
| O436            | 1.774089485             | -1.965413845  | -6.449691305  |              |
| O437            | -6.620515487            | -0.888317188  | -4.531714367  |              |
| O438            | -5.492505477            | 1.487247278   | -5.306112045  |              |
| O439            | -8.066570818            | -4.655750234  | -3.928356528  |              |
| O440            | -5.885978047            | -3.930173719  | 0.313927445   |              |
| O441            | -7.338885626            | -0.370397108  | 1.609726266   |              |
| O442            | -10.875519212           | -0.907082576  | 2.162928730   |              |
| O443            | 6.172144265             | 0.813734892   | 9.341187772   |              |
| O444            | -1.972241127            | 2.189183846   | 6.693713133   |              |
| O445            | -3.142787451            | 7.669832354   | 4.598246487   |              |
| O446            | -4.930404440            | 9.116213373   | 1.288684710   |              |
| O447            | -5.201291302            | 5.262615958   | 0.263183995   |              |
| O448            | -6.453697098            | 3.768591011   | 3.818990005   |              |
| O449            | -3.041763610            | 4.014874498   | 4.692806189   |              |
| O450            | -8.346674622            | 7.348446762   | 5.876365487   |              |
| O451            | -11.597829906           | 7.675769088   | 2.909376208   |              |
| O452            | -9.478741911            | 7.362591295   | 0.056850836   |              |
| O453            | -13.647854094           | 4.421490516   | 3.946013765   |              |
| O454            | -7.927214602            | 3.483030563   | -2.281259458  |              |
| O455            | 6.731688058             | 3.280629661   | -6.622580955  |              |
| O456            | 2.756055067             | 4.807060293   | -6.535566405  |              |
| O457            | 1.295679073             | 8.661643591   | -3.739590716  |              |
| O458            | 3.454248472             | 11.052804196  | -1.628283959  |              |
| O459            | 0.919418861             | 1.816586873   | -10.258506100 |              |
| O460            | 5.204330314             | -1.138734206  | -7.196393409  |              |
| O461            | 6.119152728             | 0.719502673   | -6.371406879  |              |
| O462            | -1.857688523            | 5.295352160   | -7.743782270  |              |
| O463            | 11.366068264            | 2.952863885   | 1.753095566   |              |
| O464            | 13.908602765            | 2.133989948   | 4.026220217   |              |
| O465            | 4.316681425             | -3.960065243  | -2.459933039  |              |
| O466            | 5.780573986             | -5.606915712  | -2.155531147  |              |
| O467            | 11.563054330            | -3.135399619  | -2.658893524  |              |
| O468            | 10.068821685            | -3.795677632  | -4.219600084  |              |
| O469            | 7.638221408             | -0.852209096  | 0.349786248   |              |
| O470            | 8.480677688             | -2.906289366  | 0.728687473   |              |
| O471            | 6.368079865             | -1.550571432  | -1.839016487  |              |
| O472            | 10.314593865            | -1.160261312  | 4.212919102   |              |
| O473            | 7.932517762             | -0.135596652  | 3.065343340   |              |
| O474            | -5.454051728            | 3.093506934   | -3.086639558  |              |
| O475            | 13.002555012            | -2.189598174  | -0.063884545  |              |
| O476            | 10.937955238            | -2.603916367  | 1.893306217   |              |
| S477            | -0.320261872            | 6.263798401   | 2.477252052   |              |
| S478            | 1.040000090             | 4.443373865   | -0.501686963  |              |
| S479            | 4.487748849             | 1.045723764   | -2.402241849  |              |
| S480            | 1.179225868             | 2.677820762   | 2.726090539   |              |
| S481            | 1.301728074             | 0.280123401   | -0.647660234  |              |
| S482            | 4.687154645             | 4.790325078   | -1.653083002  |              |
| S483            | 4.558602426             | -0.649485240  | 0.818183886   |              |
| S484            | 3.416887815             | 5.445710553   | 1.990112529   |              |
| S485            | 6.769034281             | 2.274929349   | 0.249927045   |              |
| S486            | 4.904607444             | 2.057991535   | 3.467230649   |              |
| A 47(3/2)<br>TS | bm22n2xd47tg_1_53004.91 |               |               |              |
|                 | C1                      | -1.858249301  | -7.349375251  | -5.722135242 |
|                 | C2                      | -0.971633345  | -7.600429345  | -6.945916231 |
|                 | C3                      | -4.155193061  | -7.165894003  | -4.872923678 |



|     |               |               |              |
|-----|---------------|---------------|--------------|
| C4  | -4.063348863  | -8.080036889  | -3.653165157 |
| C5  | -3.502648565  | -10.290424537 | -2.773820739 |
| C6  | -2.326713378  | -9.946940267  | -1.852195882 |
| C7  | -0.154111656  | -8.838003930  | -1.638263854 |
| C8  | -0.520233966  | -7.624234471  | -0.779465338 |
| C9  | -1.755261256  | -5.528721241  | -0.607085868 |
| C10 | -2.702018934  | -5.916641082  | 0.539297757  |
| C11 | -4.537763494  | -7.305455514  | 1.306328319  |
| C12 | -3.889329056  | -8.117307540  | 2.435131831  |
| C13 | -2.456860801  | -10.013722519 | 3.017637942  |
| C14 | -1.182822245  | -9.575943923  | 3.752056149  |
| C15 | 0.974039186   | -8.405999270  | 3.594586571  |
| C16 | 1.163367567   | -6.942723133  | 4.005881162  |
| C17 | 0.190124989   | -4.659835085  | 3.957037046  |
| C18 | -0.895093115  | -4.301633101  | 4.988230020  |
| C19 | 0.127778272   | -3.794877047  | 2.670329290  |
| C20 | -0.064638630  | -2.306344226  | 2.984130719  |
| C21 | 1.376719906   | -4.017019592  | 1.809564084  |
| C22 | -3.301686516  | -4.178439133  | 5.494455412  |
| C23 | -3.484269627  | -5.250404147  | 6.583609308  |
| C24 | -4.596598160  | -3.926383415  | 4.686169738  |
| C25 | -5.798203755  | -3.715959664  | 5.615105962  |
| C26 | -4.426803287  | -2.724426300  | 3.748084872  |
| C27 | -3.776506278  | -7.593239776  | 7.131186451  |
| C28 | -2.747617755  | -7.605815949  | 8.243966823  |
| C29 | 10.730963274  | -7.548990022  | 3.239026440  |
| C30 | 10.427367641  | -6.058315944  | 3.410829497  |
| C31 | 8.860019722   | -4.473134359  | 4.547388903  |
| C32 | 9.200311218   | -4.226630361  | 6.030990247  |
| C33 | 7.344573701   | -4.388186807  | 4.289371302  |
| C34 | 6.732366372   | -3.020695773  | 4.609011970  |
| C35 | 5.291596726   | -2.942431104  | 4.102222744  |
| C36 | 3.489940311   | -1.370485875  | 4.850420361  |
| C37 | 10.250707978  | -2.702127698  | 7.635307205  |
| C38 | 9.404490069   | -1.629178497  | 8.288284154  |
| C39 | -1.273026570  | -2.940928033  | -5.250204042 |
| C40 | -2.639665545  | -2.430415937  | -4.766689345 |
| C41 | -0.208991772  | -2.421001100  | -4.255942376 |
| C42 | 1.186340006   | -3.070472597  | -4.354489806 |
| C43 | 2.149541933   | -2.411734842  | -5.340134254 |
| C44 | -4.294554894  | -0.650880738  | -5.077650589 |
| C45 | -5.633746605  | -1.390763088  | -5.113319957 |
| C46 | -4.415777333  | 0.692291867   | -5.827386898 |
| C47 | -6.829763284  | -3.464311379  | -5.591384382 |
| C48 | -7.010481490  | -4.088334703  | -4.200547445 |
| C49 | -6.004704335  | -4.539192004  | -2.001332487 |
| C50 | -5.929925341  | -3.535502967  | -0.852204804 |
| C51 | -5.892116598  | -1.177193445  | -0.154821387 |
| C52 | -7.267762307  | -0.901072812  | 0.497545157  |
| C53 | -5.413854782  | 0.174105962   | -0.705372405 |
| C54 | -3.997637274  | 0.258712222   | -1.178956555 |
| C55 | -2.848126623  | -0.441718638  | -0.901612556 |
| C56 | -2.295756757  | 1.243387239   | -2.236755419 |
| C57 | -9.686098122  | -0.725897806  | 0.057958093  |
| C58 | -10.157114018 | -1.437100129  | 1.321118372  |
| C59 | -10.624478085 | -1.079668997  | -1.126873742 |
| C60 | -11.916166966 | -0.320052256  | -1.191160172 |
| C61 | -12.957626791 | -0.241820526  | -0.286011924 |
| C62 | -13.407118399 | 0.971254841   | -2.084430588 |
| C63 | 4.188266389   | 2.072573723   | 8.709690533  |
| C64 | 5.673742239   | 1.764422519   | 8.749439242  |
| C65 | 3.631355229   | 1.412464397   | 7.422882886  |
| C66 | 2.141970942   | 1.603559330   | 7.253647534  |
| C67 | 1.218327605   | 0.708560700   | 7.822945793  |
| C68 | 1.635769592   | 2.684451582   | 6.507625388  |
| C69 | -0.160473993  | 0.874819069   | 7.649437398  |
| C70 | 0.263375805   | 2.870627587   | 6.336507617  |
| C71 | -0.633831324  | 1.961977985   | 6.903002516  |
| C72 | -0.730636614  | 7.719398664   | 4.894673368  |
| C73 | -2.063227632  | 8.197734147   | 4.303348019  |
| C74 | -0.370029142  | 6.336104013   | 4.330658891  |
| C75 | -3.173478005  | 9.763354551   | 2.771624757  |
| C76 | -3.780634371  | 8.882823848   | 1.678440301  |

|       |               |              |              |
|-------|---------------|--------------|--------------|
| C77   | -3.468105127  | 6.947893195  | 0.180670113  |
| C78   | -4.186126904  | 5.738053515  | 0.816708336  |
| C79   | -2.291844089  | 6.539030493  | -0.726358869 |
| C80   | -2.596693410  | 5.592801700  | -1.892879048 |
| C81   | -3.390823978  | 6.175545926  | -3.078958330 |
| C82   | -5.811169897  | 6.802559673  | -2.916591001 |
| C83   | -4.357750715  | 4.148619599  | 2.664010669  |
| C84   | -5.554970147  | 4.579243834  | 3.536248395  |
| C85   | -3.412834159  | 3.308328544  | 3.531755732  |
| C86   | -6.352738515  | 6.193682146  | 5.191020024  |
| C87   | -7.676534305  | 6.908264671  | 4.930524303  |
| C88   | -9.206895007  | 7.874744912  | 3.256839812  |
| C89   | -10.521802632 | 7.084074811  | 3.084137552  |
| C90   | -8.916312879  | 8.716949147  | 1.991817209  |
| C91   | -8.600863490  | 7.830977074  | 0.792521146  |
| C92   | -11.551264324 | 4.865789060  | 2.836439000  |
| C93   | -12.518718367 | 4.840945082  | 4.017084738  |
| C94   | -11.071274863 | 3.425553396  | 2.512755924  |
| C95   | -10.243087340 | 3.365281291  | 1.249698459  |
| C96   | -10.858204514 | 3.224551177  | -0.003259512 |
| C97   | -8.844921564  | 3.491729090  | 1.291191186  |
| C98   | -10.108672077 | 3.234929165  | -1.182405926 |
| C99   | -8.080003066  | 3.528360553  | 0.122017307  |
| C100  | -8.726052402  | 3.408242018  | -1.106274584 |
| C101  | 7.954099228   | 4.804325976  | -5.193656470 |
| C102  | 6.700043833   | 4.069535789  | -5.639154262 |
| C103  | 4.315485288   | 3.631754865  | -5.094290561 |
| C104  | 3.209579718   | 4.650922965  | -5.390659583 |
| C105  | 1.823733905   | 6.434465621  | -4.435727671 |
| C106  | 1.970978749   | 7.647687225  | -3.521293503 |
| C107  | 2.887968941   | 8.679853159  | -1.519481945 |
| C108  | 3.591703710   | 9.903213636  | -2.069797353 |
| C109  | 3.101137336   | 2.359732371  | -9.375292108 |
| C110  | 1.571755017   | 2.463067739  | -9.440631789 |
| C111  | 3.508810379   | 1.286838273  | -8.338113460 |
| C112  | 4.981499208   | 0.870122439  | -8.515900146 |
| C113  | 5.452438423   | 0.054458651  | -7.332737330 |
| C114  | -0.468653133  | 3.430939924  | -8.487872478 |
| C115  | -0.843324365  | 4.888323169  | -8.295833202 |
| C116  | -1.172043172  | 2.448383909  | -7.518917757 |
| C117  | -0.499919768  | 2.370599123  | -6.169565104 |
| C118  | -0.743188393  | 3.334481370  | -5.176118239 |
| C119  | 0.462192110   | 1.377614121  | -5.918070261 |
| C120  | -0.016242137  | 3.317712574  | -3.979554095 |
| C121  | 1.185267697   | 1.361271234  | -4.720402328 |
| C122  | 0.955620467   | 2.338934169  | -3.749266310 |
| C123  | 10.847601429  | 2.221394966  | -0.514639144 |
| C124  | 11.447335620  | 2.055056880  | 0.890658776  |
| C125  | 10.101071274  | 0.958205307  | -0.975809152 |
| C126  | 9.323939421   | 1.080789484  | -2.250072537 |
| C127  | 9.831095151   | 1.307361777  | -3.514699757 |
| C128  | 7.657091292   | 0.904145750  | -3.649581956 |
| C129  | 12.721731383  | 0.720271730  | 2.472474012  |
| C130  | 13.617535882  | 1.873514505  | 2.869489245  |
| C131  | 5.328375802   | -4.395782889 | -1.830556202 |
| C132  | 5.996775730   | -3.654130299 | -0.706104581 |
| C133  | 7.066790115   | -2.602746702 | -1.204284861 |
| C134  | 8.120258290   | -3.323241707 | -2.096341640 |
| C135  | 9.305400977   | -2.419658007 | -2.474836557 |
| C136  | 10.458085029  | -3.154833050 | -3.102398052 |
| C137  | 7.815591483   | -2.114792353 | 0.074008310  |
| C138  | 3.504030360   | 2.442250408  | 0.416074902  |
| Fe139 | 4.948791486   | 2.685584796  | -0.951030680 |
| Fe140 | 1.425318755   | 2.325893274  | 0.496647524  |
| Fe141 | 3.326249219   | 3.134924955  | 2.281753439  |
| Fe142 | 3.264854636   | 4.391181277  | 0.003239490  |
| Fe143 | 1.249590747   | 4.806780996  | 1.691098564  |
| Fe144 | 5.025295878   | 1.484016291  | 1.330859352  |
| Fe145 | 3.413270202   | 0.702900788  | -0.521799867 |
| H146  | 0.815506420   | -7.497823877 | -5.968451207 |
| H147  | 0.435103156   | -6.127466449 | -6.770104594 |
| H148  | -3.544461416  | -7.575522396 | -6.880036799 |
| H149  | -1.438657183  | -7.145486169 | -7.833462682 |

|      |              |               |               |
|------|--------------|---------------|---------------|
| H150 | -0.980671740 | -8.690246516  | -7.122257339  |
| H151 | -4.017721526 | -6.141769079  | -4.497881718  |
| H152 | -3.478903669 | -9.655925188  | -4.829661713  |
| H153 | -5.167382198 | -7.249538967  | -5.291322475  |
| H154 | -3.344420333 | -11.295187160 | -3.187744590  |
| H155 | -1.359846654 | -8.989951788  | -3.391050218  |
| H156 | -4.401845248 | -10.314064675 | -2.144283242  |
| H157 | -0.911981409 | -4.991874385  | -0.154110903  |
| H158 | -1.510150676 | -6.745630872  | -2.367969117  |
| H159 | 0.667767204  | -8.572261892  | -2.317016279  |
| H160 | -5.006711527 | -6.425379791  | 1.765265221   |
| H161 | -3.702316204 | -7.262432615  | -0.677319992  |
| H162 | 0.195941843  | -9.620555281  | -0.955438176  |
| H163 | -2.270419808 | -4.842614174  | -1.294347893  |
| H164 | -2.853602578 | -9.262486105  | 1.057900680   |
| H165 | -5.320551200 | -7.917602882  | 0.837113542   |
| H166 | 1.512767909  | -5.078077170  | 1.552889470   |
| H167 | 1.302154977  | -3.442955760  | 0.873589083   |
| H168 | 2.282148915  | -3.670253928  | 2.332029840   |
| H169 | -0.749678211 | -4.135919401  | 2.097412744   |
| H170 | -2.229775498 | -10.954160566 | 2.495040279   |
| H171 | -3.601348368 | -2.867618687  | 3.036967643   |
| H172 | -3.569400399 | -6.786153230  | 5.172961949   |
| H173 | -5.997339557 | -4.594802905  | 6.244827010   |
| H174 | -0.103911569 | -1.725676081  | 2.050112585   |
| H175 | 0.774707471  | -1.908881384  | 3.573802383   |
| H176 | 3.718796949  | 1.574386707   | 9.580147031   |
| H177 | -5.346262027 | -2.569182096  | 3.165529918   |
| H178 | -6.699382600 | -3.514132931  | 5.017637678   |
| H179 | -4.230422223 | -1.809133047  | 4.329856985   |
| H180 | -5.631115028 | -2.855063696  | 6.281251286   |
| H181 | -4.789309712 | -4.824158505  | 4.071090618   |
| H182 | -3.036637923 | -3.264273181  | 6.045946287   |
| H183 | -2.392650393 | -4.820031587  | 3.653734300   |
| H184 | -0.995211203 | -2.119253416  | 3.541216658   |
| H185 | -2.514604636 | 3.059095579   | 2.942664503   |
| H186 | -3.945006465 | 2.372842861   | 3.771840946   |
| H187 | -2.680227474 | 3.382869238   | 5.347309793   |
| H188 | -2.500021868 | 1.464565750   | 7.099050130   |
| H189 | -0.109796463 | 3.700174236   | 5.734372000   |
| H190 | 2.328003419  | 3.376623369   | 6.022675495   |
| H191 | 1.578531028  | -0.141787013  | 8.409758200   |
| H192 | -0.613286031 | -6.465532658  | 3.122446711   |
| H193 | 1.758070669  | -8.633880360  | 2.856695064   |
| H194 | 1.162182734  | -9.018652122  | 4.485676464   |
| H195 | -0.502810312 | -8.562621264  | 2.072487219   |
| H196 | -3.202752358 | -10.223756128 | 3.794670074   |
| H197 | -0.861803111 | 0.158376559   | 8.084374122   |
| H198 | 1.144060164  | -4.479310146  | 4.469816012   |
| H199 | -4.780793788 | -7.533178323  | 7.582318369   |
| H200 | -3.702341320 | -8.557820926  | 6.604376759   |
| H201 | -1.759512477 | -7.161269641  | 7.978741841   |
| H202 | 11.304502857 | -2.385164312  | 7.638217095   |
| H203 | 4.126924814  | -1.959145148  | -5.606379167  |
| H204 | 6.553496388  | -5.848586558  | -1.500455746  |
| H205 | 5.075693224  | 0.251758503   | -9.419851150  |
| H206 | 5.616581093  | 1.759916487   | -8.636125843  |
| H207 | 2.870674813  | 0.395428569   | -8.438353807  |
| H208 | -0.118837147 | 5.606935407   | -8.745247271  |
| H209 | 3.378311800  | 1.979700185   | -10.370783967 |
| H210 | -0.126242561 | -1.328090724  | -4.370616255  |
| H211 | 1.090156158  | -4.129427589  | -4.652097461  |
| H212 | 1.545446572  | 3.771520353   | -7.831141635  |
| H213 | -0.820802221 | 3.194246153   | -9.511557569  |
| H214 | 3.644371269  | 4.026494584   | -8.262432363  |
| H215 | 3.762068141  | -2.727378877  | -4.062336043  |
| H216 | 3.332747117  | 1.686085984   | -7.327214530  |
| H217 | 4.724104555  | 3.614270014   | -9.433928970  |
| H218 | -1.265701107 | -3.228712933  | -7.293309132  |
| H219 | -0.595139162 | -2.607961928  | -3.243101978  |
| H220 | 6.256482722  | 1.695742227   | -6.590273013  |
| H221 | 1.644769174  | -3.080012545  | -3.355880195  |
| H222 | -5.237216934 | -1.521201616  | 0.657362723   |

|      |               |              |              |
|------|---------------|--------------|--------------|
| H223 | -2.678352643  | -1.314879729 | -0.283181514 |
| H224 | -6.954882418  | -5.081625809 | -1.898521025 |
| H225 | -5.063859016  | -3.575627273 | -3.653976850 |
| H226 | -8.196641945  | -1.661116603 | -1.165523520 |
| H227 | -13.112563086 | -0.675355038 | 0.696219721  |
| H228 | -9.800010517  | -2.493081596 | 1.403946448  |
| H229 | -10.801194976 | -2.169137976 | -1.128038584 |
| H230 | -9.691942569  | 0.359886320  | 0.239719720  |
| H231 | -13.958495947 | 1.623385370  | -2.756171044 |
| H232 | -5.550227258  | 0.908070603  | 0.106000808  |
| H233 | -6.086503998  | 0.485758160  | -1.521511351 |
| H234 | -14.782550719 | 0.859529716  | -0.463538052 |
| H235 | -10.081842335 | -0.846390491 | -2.055429201 |
| H236 | -5.957410195  | -1.944062300 | -2.169235718 |
| H237 | -5.198146796  | -5.272481495 | -1.855245386 |
| H238 | -7.750902802  | -2.910341341 | -5.812672228 |
| H239 | -1.708285192  | 1.931989400  | -2.838322681 |
| H240 | -6.741113430  | -4.275747212 | -6.325293627 |
| H241 | 4.167271376   | 3.915792894  | 9.606300300  |
| H242 | 3.024037561   | 3.736336428  | 8.452451165  |
| H243 | -2.755278322  | 5.563214781  | 2.307420149  |
| H244 | -4.775281693  | 3.486962298  | 1.892101775  |
| H245 | -4.653775604  | 6.374806587  | 3.948838223  |
| H246 | -4.280382186  | 2.033008305  | -2.376892045 |
| H247 | -5.491097480  | 2.647921958  | -3.951500048 |
| H248 | -6.383340749  | 3.055906055  | -2.696785399 |
| H249 | -3.479130890  | 1.255746083  | -5.716764456 |
| H250 | -4.594077776  | 0.508512471  | -6.900032777 |
| H251 | -8.085358491  | 9.402919516  | 2.215132724  |
| H252 | -9.813728112  | 9.306868224  | 1.767331400  |
| H253 | -6.521646208  | 8.109499872  | 1.009267660  |
| H254 | -7.028148778  | 6.867003474  | -0.097028774 |
| H255 | -6.351435996  | 8.775194376  | -2.975330375 |
| H256 | -3.028547976  | 5.735130401  | -4.019829194 |
| H257 | -10.600775258 | 3.099534744  | -2.148763661 |
| H258 | -8.322208437  | 3.554726246  | 2.249745387  |
| H259 | -7.279331977  | 5.407572214  | -2.491831833 |
| H260 | -1.517258230  | 6.062557430  | -0.105294432 |
| H261 | -2.077323075  | 7.721126012  | 1.608988917  |
| H262 | -3.091959634  | 4.676228221  | -1.534312405 |
| H263 | -4.827244117  | -2.928371990 | -6.168135839 |
| H264 | -2.927298002  | 10.734986266 | 2.322596829  |
| H265 | -2.563426849  | -1.189348613 | -6.335299739 |
| H266 | -1.846276773  | 7.467448545  | -1.121476535 |
| H267 | -7.001208685  | 3.688734549  | 0.171447646  |
| H268 | -6.194124526  | 0.856041728  | -5.029153095 |
| H269 | -3.968170570  | 9.926101760  | 3.513028737  |
| H270 | -4.757612181  | 8.451655853  | -3.542649934 |
| H271 | -7.848669202  | 7.016385944  | -2.805577498 |
| H272 | -0.007250805  | -2.285073677 | -6.731527082 |
| H273 | -1.319012243  | -4.041890621 | -5.147036085 |
| H274 | -11.941598762 | 3.095539335  | -0.065556687 |
| H275 | -4.149696327  | -0.424048272 | -4.008751409 |
| H276 | -4.242429694  | 7.456778371  | -0.409619383 |
| H277 | -3.213972901  | 7.255953747  | -3.151798569 |
| H278 | -1.620362443  | 5.273800721  | -2.284344159 |
| H279 | -5.099498828  | 4.904316168  | -3.009744380 |
| H280 | -6.597169113  | 5.282556032  | 5.757246366  |
| H281 | -7.380121435  | 6.801236786  | 2.903776491  |
| H282 | -9.395199293  | 8.566017213  | 4.091707987  |
| H283 | -5.768423066  | 6.849468723  | 5.849350496  |
| H284 | -9.494785346  | 5.328638681  | 3.255699625  |
| H285 | 7.676337370   | 5.750546818  | -4.706055852 |
| H286 | 8.414695520   | 4.163981159  | -4.412620046 |
| H287 | 10.126742629  | 3.047086552  | -0.424994341 |
| H288 | 9.751644390   | 5.338394572  | -5.987404186 |
| H289 | 8.955924963   | 4.202857531  | -6.859547730 |
| H290 | 0.611228350   | 6.047170111  | 4.726474368  |
| H291 | -1.605868028  | 7.087619388  | 6.624136675  |
| H292 | -1.078224422  | 9.607808235  | 3.174164276  |
| H293 | -1.126278196  | 5.609676326  | 4.660154296  |
| H294 | -0.926501203  | 8.569443319  | 6.752120997  |
| H295 | 3.459410368   | 8.333941302  | -0.643116321 |

|       |               |              |              |
|-------|---------------|--------------|--------------|
| H296  | 0.064396622   | 8.431224619  | 4.622010653  |
| H297  | 6.843471140   | -5.176089799 | 4.876268541  |
| H298  | 9.377696367   | -3.739505663 | 3.916867210  |
| H299  | 3.342419537   | 6.725115536  | -2.237379057 |
| H300  | 2.169147118   | 0.133521464  | 5.228089571  |
| H301  | 1.824406905   | 6.798276486  | -5.470985654 |
| H302  | 1.939408557   | 0.591755239  | -4.542526825 |
| H303  | 0.814562733   | 6.027543588  | -4.250152726 |
| H304  | 4.664656979   | -3.702838769 | 4.585989738  |
| H305  | 3.206978824   | 5.109881166  | -3.402968246 |
| H306  | 5.267553961   | -3.151091848 | 3.019375200  |
| H307  | 7.190043052   | -4.623374147 | 3.223748251  |
| H308  | 7.313592095   | -2.219873177 | 4.126838270  |
| H309  | 6.747664836   | -2.829809384 | 5.694512841  |
| H310  | -1.169624495  | 1.457034749  | -7.994472891 |
| H311  | 8.924118635   | -6.626678190 | 4.597093548  |
| H312  | 10.486008271  | -7.786463599 | 2.192329069  |
| H313  | 1.512383424   | 2.325790255  | -2.810867266 |
| H314  | 10.474617264  | -8.618981626 | 4.981900295  |
| H315  | 9.764600836   | -9.311627341 | 3.677851659  |
| H316  | 5.088876197   | -0.853803047 | 3.753196465  |
| H317  | -0.188736561  | 4.075030567  | -3.211623187 |
| H318  | 0.655006381   | 0.608943809  | -6.669995506 |
| H319  | 12.309910718  | -2.388539050 | 0.615549512  |
| H320  | 10.837638299  | 0.144706095  | -1.105437741 |
| H321  | 10.041074332  | -2.612110055 | 1.477093461  |
| H322  | 12.582920168  | -2.489479432 | -0.901466379 |
| H323  | 4.214581507   | 9.722092800  | -2.979023713 |
| H324  | 7.904818761   | -0.386475196 | 2.098066120  |
| H325  | 6.476603633   | -4.346853030 | 0.000895941  |
| H326  | 5.691976629   | 4.824867097  | -4.023094905 |
| H327  | 8.497435336   | -4.192105450 | -1.534073728 |
| H328  | 8.798072217   | 1.278001189  | -5.391777860 |
| H329  | 6.681162062   | 0.738094542  | -4.088790712 |
| H330  | 11.824496273  | -7.656265654 | 3.336863126  |
| H331  | 3.383638457   | 0.518340594  | 4.045102285  |
| H332  | 9.499106713   | -0.688864851 | 3.906019863  |
| H333  | 7.448823800   | 0.706850290  | 3.100616493  |
| H334  | 10.001303263  | -2.372332125 | 5.521057051  |
| H335  | 3.400884819   | -3.034376903 | 6.065810819  |
| H336  | 10.926615319  | -4.247840145 | -4.574365236 |
| H337  | 8.959092614   | -1.646735396 | -3.176737179 |
| H338  | 9.707898671   | -1.915816975 | -1.589809613 |
| H339  | 7.629650321   | -3.686502874 | -3.010998622 |
| H340  | 4.069325028   | 3.034194380  | -4.202198730 |
| H341  | -1.485954516  | 4.115749870  | -5.359817411 |
| H342  | -2.218026548  | 2.779097927  | -7.426576202 |
| H343  | 5.228017664   | -3.073753220 | -0.178284574 |
| H344  | 10.625720247  | -1.629665082 | 3.405877816  |
| H345  | 11.034858884  | -3.523366789 | 2.258875246  |
| H346  | 1.957346192   | -2.090066580 | 6.018096427  |
| H347  | 10.837346324  | 1.529861824  | -3.851399522 |
| H348  | 9.417743976   | 0.634888765  | -0.181058722 |
| H349  | 4.401698840   | 2.968849661  | -5.957941342 |
| H350  | 1.884668606   | 8.970293233  | -1.172767729 |
| H351  | 3.869788697   | 0.339407681  | 7.476410044  |
| H352  | 4.161240190   | 1.831448392  | 6.552960822  |
| H353  | 12.284831118  | 3.526565745  | -1.177602336 |
| H354  | 12.648411508  | 1.961951847  | -1.483866183 |
| H355  | 13.354076405  | -0.180702505 | 2.430635451  |
| H356  | 12.187179881  | 0.136211751  | 0.493241380  |
| H357  | 14.069451239  | 2.436815783  | 2.017787820  |
| H358  | 11.960571747  | 0.555316270  | 3.251489886  |
| H359  | 6.303043441   | 2.475646713  | 8.160932955  |
| H360  | -12.088754371 | 5.181293728  | 4.988701827  |
| H361  | 10.164756881  | -3.606749433 | 8.261644808  |
| H362  | 8.358262766   | -1.546605659 | 7.905344219  |
| H363  | -12.108975820 | 5.259767945  | 1.971923645  |
| H364  | -10.493254703 | 3.040118153  | 3.367649104  |
| H365  | -11.968527439 | 2.797299955  | 2.416763326  |
| H366  | -8.532814648  | 3.353039152  | -3.043196412 |
| H367  | -0.781428993  | 0.029481819  | -1.422471201 |
| Mo368 | 6.128973380   | 0.248805366  | -0.832442912 |

|      |               |               |              |
|------|---------------|---------------|--------------|
| N369 | 0.405801778   | -7.147789401  | -6.838672882 |
| N370 | -3.199771941  | -7.467982425  | -5.929263591 |
| N371 | -3.676045154  | -9.359284745  | -3.877031773 |
| N372 | -1.266588572  | -9.333852705  | -2.435844775 |
| N373 | -1.283598375  | -6.672449812  | -1.375615659 |
| N374 | -3.603877538  | -6.891043209  | 0.270864982  |
| N375 | -3.010833174  | -9.079196797  | 2.052051785  |
| N376 | -0.326172757  | -8.772690820  | 3.059216653  |
| N377 | 0.168242055   | -6.088224360  | 3.654793517  |
| N378 | -2.186629324  | -4.502929460  | 4.603538003  |
| N379 | -3.536270610  | -6.540986936  | 6.164825377  |
| N380 | 9.950639433   | -8.415343356  | 4.128738690  |
| N381 | 9.350911061   | -5.794927449  | 4.175054659  |
| N382 | 4.692264379   | -1.618046532  | 4.309720516  |
| N383 | 2.873824474   | -2.286940832  | 5.627468636  |
| N384 | 2.863822446   | -0.216517654  | 4.570393841  |
| N385 | 9.816630028   | -3.047780697  | 6.294318131  |
| N386 | -1.016226098  | -2.497073937  | -6.624522423 |
| N387 | 3.442137764   | -2.368155612  | -4.963345393 |
| N388 | -3.163029510  | -1.433701731  | -5.530571225 |
| N389 | -5.676335217  | -2.591354073  | -5.720173294 |
| N390 | -5.954568475  | -3.983649951  | -3.342402654 |
| N391 | -5.931633379  | -2.206071029  | -1.185178741 |
| N392 | -3.619141916  | 1.297273502   | -2.019472293 |
| N393 | -1.815255960  | 0.184888886   | -1.574905374 |
| N394 | -8.341509490  | -1.170372104  | -0.287239073 |
| N395 | -12.211762536 | 0.442344720   | -2.311050352 |
| N396 | -13.891651900 | 0.586121079   | -0.869733731 |
| N397 | 4.000946090   | 3.525179747   | 8.675048793  |
| N398 | -0.779056489  | 7.634076772   | 6.361870502  |
| N399 | -1.990631341  | 9.235057465   | 3.422164808  |
| N400 | -2.994583330  | 7.906426819   | 1.174415259  |
| N401 | -4.831825581  | 5.904123587   | -3.011898378 |
| N402 | -5.572298905  | 8.126429819   | -3.032251045 |
| N403 | -7.063849914  | 6.397781745   | -2.623590719 |
| N404 | -3.687749910  | 5.257005638   | 1.988171468  |
| N405 | -5.526130577  | 5.845285107   | 4.042836524  |
| N406 | -8.052990853  | 7.061062288   | 3.627260991  |
| N407 | -7.282397738  | 7.530086125   | 0.633707713  |
| N408 | -10.416261005 | 5.732844488   | 3.106197172  |
| N409 | 8.828212118   | 5.075115098   | -6.338337549 |
| N410 | 5.601078636   | 4.287829509   | -4.891334984 |
| N411 | 2.824948313   | 5.387768951   | -4.326518414 |
| N412 | 2.827873991   | 7.583250734   | -2.472005052 |
| N413 | 3.725438234   | 3.679843843   | -9.226315272 |
| N414 | 0.977755830   | 3.297340404   | -8.541161816 |
| N415 | 11.878281979  | 2.638592308   | -1.486573784 |
| N416 | 7.954595270   | 0.834928188   | -2.354639968 |
| N417 | 8.764532632   | 1.192997549   | -4.379446215 |
| N418 | 12.135695507  | 0.909439902   | 1.156611236  |
| N419 | -1.751896974  | 2.368512989   | 0.630602451  |
| N420 | -0.636260047  | 2.269275819   | 0.581825339  |
| O421 | -1.391312169  | -7.106723080  | -4.594069576 |
| O422 | -4.346084553  | -7.653424106  | -2.520942287 |
| O423 | -2.360349081  | -10.250167802 | -0.648576495 |
| O424 | -0.150679641  | -7.527318294  | 0.401205589  |
| O425 | -2.641126780  | -5.358487287  | 1.646504953  |
| O426 | -4.198912778  | -7.922104462  | 3.622858231  |
| O427 | -0.962904956  | -9.992768594  | 4.897268748  |
| O428 | 2.198419451   | -6.608411900  | 4.600537927  |
| O429 | -0.590080829  | -3.843759989  | 6.100657110  |
| O430 | -3.586740574  | -4.949886059  | 7.784443351  |
| O431 | -2.951140243  | -8.113161484  | 9.336008861  |
| O432 | 11.145677120  | -5.211586793  | 2.836911669  |
| O433 | 8.922858654   | -5.078423884  | 6.893345001  |
| O434 | 9.814029582   | -0.903828929  | 9.180342954  |
| O435 | -3.210969270  | -2.882480987  | -3.753340650 |
| O436 | 1.765940825   | -1.954740817  | -6.440619709 |
| O437 | -6.625608443  | -0.876657007  | -4.548462282 |
| O438 | -5.477746246  | 1.492031469   | -5.281458882 |
| O439 | -8.075303314  | -4.653629026  | -3.923705065 |
| O440 | -5.889501616  | -3.932124802  | 0.315054121  |
| O441 | -7.348702999  | -0.374334578  | 1.610182943  |

|                          |                    |               |               |               |
|--------------------------|--------------------|---------------|---------------|---------------|
|                          | O442               | -10.895839859 | -0.945369318  | 2.156211288   |
|                          | O443               | 6.166021587   | 0.817129165   | 9.344913762   |
|                          | O444               | -1.979763084  | 2.176907138   | 6.683799928   |
|                          | O445               | -3.151334948  | 7.676673888   | 4.609871119   |
|                          | O446               | -4.940964043  | 9.120782136   | 1.286014477   |
|                          | O447               | -5.190307924  | 5.259635490   | 0.258871980   |
|                          | O448               | -6.461709500  | 3.771887946   | 3.784565812   |
|                          | O449               | -3.074332613  | 4.025820129   | 4.720917474   |
|                          | O450               | -8.360315373  | 7.301166410   | 5.884188785   |
|                          | O451               | -11.598031538 | 7.678585886   | 2.934714019   |
|                          | O452               | -9.493051345  | 7.342362552   | 0.081558788   |
|                          | O453               | -13.672153293 | 4.454377407   | 3.923947136   |
|                          | O454               | -7.946269591  | 3.495852682   | -2.275179245  |
|                          | O455               | 6.731594066   | 3.286969137   | -6.622476784  |
|                          | O456               | 2.735304106   | 4.791057385   | -6.538870003  |
|                          | O457               | 1.271603599   | 8.650750174   | -3.743125880  |
|                          | O458               | 3.521716670   | 11.006797960  | -1.552702193  |
|                          | O459               | 0.916197638   | 1.796574745   | -10.259375474 |
|                          | O460               | 5.215373813   | -1.141804865  | -7.193531909  |
|                          | O461               | 6.129097956   | 0.718934339   | -6.376279142  |
|                          | O462               | -1.862918023  | 5.277760279   | -7.745021714  |
|                          | O463               | 11.379244116  | 2.963096411   | 1.740204229   |
|                          | O464               | 13.905844096  | 2.134275025   | 4.028534126   |
|                          | O465               | 4.395817640   | -3.982680758  | -2.504668384  |
|                          | O466               | 5.830323517   | -5.639224161  | -2.122553586  |
|                          | O467               | 11.608403092  | -3.180555999  | -2.669825352  |
|                          | O468               | 10.114810558  | -3.806770154  | -4.243965671  |
|                          | O469               | 7.701440363   | -0.853555320  | 0.332902425   |
|                          | O470               | 8.500635285   | -2.918865041  | 0.747037418   |
|                          | O471               | 6.443308134   | -1.557354912  | -1.860813267  |
|                          | O472               | 10.314167850  | -1.154151916  | 4.220811114   |
|                          | O473               | 7.938673510   | -0.137314957  | 3.056658675   |
|                          | O474               | -5.469220717  | 3.110516369   | -3.070569001  |
|                          | O475               | 13.001522425  | -2.194668861  | -0.066650894  |
|                          | O476               | 10.943411876  | -2.600625543  | 1.905069456   |
|                          | S477               | -0.316827370  | 6.296337358   | 2.480904356   |
|                          | S478               | 1.070268159   | 4.467543118   | -0.504317551  |
|                          | S479               | 4.546087099   | 1.037790112   | -2.441149720  |
|                          | S480               | 1.180016216   | 2.749041352   | 2.771145939   |
|                          | S481               | 1.279556496   | 0.286135214   | -0.660773128  |
|                          | S482               | 4.703468863   | 4.808854057   | -1.639090131  |
|                          | S483               | 4.610914205   | -0.662215419  | 0.798466931   |
|                          | S484               | 3.453557749   | 5.405838907   | 1.974941326   |
|                          | S485               | 6.806010266   | 2.263274085   | 0.252126753   |
|                          | S486               | 4.900607216   | 2.059648283   | 3.448478006   |
| A 47(3/2)<br>dissociated | bm22n2xd47tf.car_6 |               |               |               |
|                          | C1                 | -1.841467894  | -7.320004239  | -5.706047916  |
|                          | C2                 | -0.951890643  | -7.584559252  | -6.924667580  |
|                          | C3                 | -4.144580817  | -7.137065488  | -4.870866474  |
|                          | C4                 | -4.062514052  | -8.062131791  | -3.658171576  |
|                          | C5                 | -3.511104309  | -10.280815661 | -2.793353086  |
|                          | C6                 | -2.336161962  | -9.950791399  | -1.865860071  |
|                          | C7                 | -0.154970772  | -8.858222450  | -1.644161880  |
|                          | C8                 | -0.505668700  | -7.640308753  | -0.785420518  |
|                          | C9                 | -1.720438643  | -5.537802238  | -0.600095696  |
|                          | C10                | -2.668351356  | -5.932312429  | 0.542891898   |
|                          | C11                | -4.522134692  | -7.309850564  | 1.290010277   |
|                          | C12                | -3.879351000  | -8.123875635  | 2.419899870   |
|                          | C13                | -2.452096771  | -10.018413698 | 3.013872626   |
|                          | C14                | -1.192460200  | -9.557452998  | 3.758199268   |
|                          | C15                | 0.956397940   | -8.375351809  | 3.600508004   |
|                          | C16                | 1.145246894   | -6.910647165  | 4.007548654   |
|                          | C17                | 0.196922348   | -4.621828122  | 3.935458445   |
|                          | C18                | -0.893136645  | -4.236408209  | 4.953138427   |
|                          | C19                | 0.173443120   | -3.762723791  | 2.643806339   |
|                          | C20                | 0.044356389   | -2.267679401  | 2.954827594   |
|                          | C21                | 1.420240385   | -4.039156514  | 1.794905696   |
|                          | C22                | -3.304933420  | -4.156261496  | 5.461878159   |
|                          | C23                | -3.479179412  | -5.235217284  | 6.548735579   |
|                          | C24                | -4.598891538  | -3.911232011  | 4.650308385   |
|                          | C25                | -5.809404467  | -3.728145554  | 5.573748203   |
|                          | C26                | -4.438709742  | -2.695349065  | 3.728793851   |

|     |               |              |              |
|-----|---------------|--------------|--------------|
| C27 | -3.732271840  | -7.586782648 | 7.094140729  |
| C28 | -2.713795326  | -7.564188015 | 8.215670477  |
| C29 | 10.726664393  | -7.546384420 | 3.249473528  |
| C30 | 10.421864180  | -6.058210953 | 3.419419193  |
| C31 | 8.858794317   | -4.476536925 | 4.569470117  |
| C32 | 9.195216600   | -4.218428204 | 6.051942284  |
| C33 | 7.344324439   | -4.407484644 | 4.306350008  |
| C34 | 6.722171426   | -3.040658074 | 4.607340463  |
| C35 | 5.292988627   | -2.969095782 | 4.068494579  |
| C36 | 3.478992735   | -1.419030466 | 4.828826362  |
| C37 | 10.259010311  | -2.691772353 | 7.645227818  |
| C38 | 9.435001978   | -1.591344585 | 8.281883852  |
| C39 | -1.256380891  | -2.913997373 | -5.232885237 |
| C40 | -2.622364584  | -2.402249975 | -4.747774783 |
| C41 | -0.183194951  | -2.408865041 | -4.243864814 |
| C42 | 1.203765697   | -3.073735514 | -4.355690649 |
| C43 | 2.165058102   | -2.428311095 | -5.351495242 |
| C44 | -4.291420526  | -0.639261089 | -5.085124782 |
| C45 | -5.622343052  | -1.394321514 | -5.110656023 |
| C46 | -4.423762928  | 0.685119839  | -5.865000653 |
| C47 | -6.803101730  | -3.474923455 | -5.597086011 |
| C48 | -6.987820509  | -4.100878832 | -4.207887001 |
| C49 | -5.991632143  | -4.550911779 | -2.003919510 |
| C50 | -5.915263274  | -3.545700229 | -0.856640855 |
| C51 | -5.862374617  | -1.184911562 | -0.166730218 |
| C52 | -7.232721271  | -0.889673480 | 0.487183426  |
| C53 | -5.368535401  | 0.152922382  | -0.732224725 |
| C54 | -3.950533670  | 0.210542900  | -1.201426157 |
| C55 | -2.803891594  | -0.472211089 | -0.868061648 |
| C56 | -2.228765914  | 1.154059961  | -2.265357950 |
| C57 | -9.648656374  | -0.685100077 | 0.064144733  |
| C58 | -10.086632896 | -1.342658107 | 1.368166120  |
| C59 | -10.613139422 | -1.087040138 | -1.084349120 |
| C60 | -11.908661223 | -0.335305673 | -1.143225820 |
| C61 | -12.948923143 | -0.271003130 | -0.235057956 |
| C62 | -13.404514454 | 0.962616102  | -2.017984207 |
| C63 | 4.207209461   | 2.075041121  | 8.704362545  |
| C64 | 5.692241326   | 1.764541021  | 8.748627890  |
| C65 | 3.654016157   | 1.422665272  | 7.409829260  |
| C66 | 2.164428648   | 1.612967151  | 7.239320148  |
| C67 | 1.241896754   | 0.721480722  | 7.816247050  |
| C68 | 1.656861000   | 2.690167161  | 6.488660347  |
| C69 | -0.137399549  | 0.892374178  | 7.651922336  |
| C70 | 0.284156417   | 2.879276608  | 6.325498874  |
| C71 | -0.612335483  | 1.977795406  | 6.904723864  |
| C72 | -0.721211103  | 7.684249386  | 4.867200775  |
| C73 | -2.051466229  | 8.187899322  | 4.291395094  |
| C74 | -0.399843250  | 6.288710651  | 4.310236875  |
| C75 | -3.143374898  | 9.765319111  | 2.756997280  |
| C76 | -3.772890355  | 8.881407816  | 1.677606265  |
| C77 | -3.484340635  | 6.923214922  | 0.200814391  |
| C78 | -4.207223264  | 5.725150310  | 0.856866056  |
| C79 | -2.311253936  | 6.501223794  | -0.706711261 |
| C80 | -2.614228718  | 5.558497602  | -1.876259899 |
| C81 | -3.392580580  | 6.145432769  | -3.069880691 |
| C82 | -5.811335274  | 6.767086640  | -2.882936114 |
| C83 | -4.399498526  | 4.186973542  | 2.753697243  |
| C84 | -5.593447998  | 4.639087217  | 3.616856775  |
| C85 | -3.457785596  | 3.361756317  | 3.643821470  |
| C86 | -6.385116701  | 6.284737829  | 5.238615704  |
| C87 | -7.706890004  | 6.990400995  | 4.945521657  |
| C88 | -9.223741436  | 7.896624012  | 3.226747376  |
| C89 | -10.523900662 | 7.084543527  | 3.037365793  |
| C90 | -8.918807020  | 8.731482574  | 1.960024714  |
| C91 | -8.584653941  | 7.843308511  | 0.768186678  |
| C92 | -11.521398272 | 4.846722232  | 2.814344299  |
| C93 | -12.464628082 | 4.807253043  | 4.013424398  |
| C94 | -11.027068290 | 3.411422579  | 2.490504338  |
| C95 | -10.200492262 | 3.350277432  | 1.226333768  |
| C96 | -10.813194156 | 3.206869010  | -0.027934877 |
| C97 | -8.801613025  | 3.467818727  | 1.270897753  |
| C98 | -10.060405754 | 3.208617277  | -1.205648250 |
| C99 | -8.033525990  | 3.491890453  | 0.103753489  |



|       |              |               |              |
|-------|--------------|---------------|--------------|
| C100  | -8.676388638 | 3.367490297   | -1.125915306 |
| C101  | 7.971729098  | 4.807090212   | -5.228775218 |
| C102  | 6.709082731  | 4.068628318   | -5.645164199 |
| C103  | 4.332444923  | 3.635877920   | -5.062155401 |
| C104  | 3.229726087  | 4.656051502   | -5.363937883 |
| C105  | 1.836783947  | 6.432983874   | -4.405024591 |
| C106  | 2.009819815  | 7.657324654   | -3.510136318 |
| C107  | 2.943525710  | 8.709121875   | -1.532850828 |
| C108  | 3.511707551  | 9.967434627   | -2.154729387 |
| C109  | 3.111942439  | 2.394959601   | -9.379858942 |
| C110  | 1.583367777  | 2.507610524   | -9.446898276 |
| C111  | 3.513394405  | 1.324413819   | -8.337131870 |
| C112  | 4.978746040  | 0.883843517   | -8.522005650 |
| C113  | 5.441545070  | 0.061056562   | -7.339404902 |
| C114  | -0.453608867 | 3.468351749   | -8.481526347 |
| C115  | -0.818232775 | 4.925835546   | -8.268089664 |
| C116  | -1.171238529 | 2.476009790   | -7.531651700 |
| C117  | -0.498593283 | 2.363326976   | -6.186180939 |
| C118  | -0.717329490 | 3.318573730   | -5.178678315 |
| C119  | 0.445601973  | 1.348782578   | -5.953759915 |
| C120  | 0.014608135  | 3.272710818   | -3.986819589 |
| C121  | 1.175376265  | 1.304163842   | -4.761297332 |
| C122  | 0.970236234  | 2.273063924   | -3.776078588 |
| C123  | 10.823182378 | 2.191843657   | -0.488855536 |
| C124  | 11.428014653 | 2.024227646   | 0.914437998  |
| C125  | 10.038409784 | 0.942507459   | -0.920719602 |
| C126  | 9.273401086  | 1.056906054   | -2.203322488 |
| C127  | 9.787005073  | 1.274274163   | -3.466871048 |
| C128  | 7.616688833  | 0.857328030   | -3.614021698 |
| C129  | 12.752895596 | 0.707589470   | 2.471384462  |
| C130  | 13.612627256 | 1.890675270   | 2.863557655  |
| C131  | 5.227143619  | -4.363938822  | -1.812179162 |
| C132  | 5.933980546  | -3.665335133  | -0.684920743 |
| C133  | 7.000219487  | -2.615361915  | -1.187917958 |
| C134  | 8.033246393  | -3.315750182  | -2.117260695 |
| C135  | 9.229464712  | -2.412977275  | -2.460703301 |
| C136  | 10.387503142 | -3.128613418  | -3.099144855 |
| C137  | 7.773499055  | -2.145584180  | 0.082113339  |
| C138  | 3.544346880  | 2.472390784   | 0.410290775  |
| Fe139 | 4.995570876  | 2.719476299   | -0.921613961 |
| Fe140 | 1.574867915  | 2.341934397   | 0.414077668  |
| Fe141 | 3.239553364  | 3.098901884   | 2.289363735  |
| Fe142 | 3.211051152  | 4.392205766   | 0.010308957  |
| Fe143 | 1.115979613  | 4.697704623   | 1.634526545  |
| Fe144 | 5.015285213  | 1.496208886   | 1.378957445  |
| Fe145 | 3.439817086  | 0.706478032   | -0.516923571 |
| H146  | 0.830784888  | -7.509556538  | -5.937901076 |
| H147  | 0.478746805  | -6.134642448  | -6.744345114 |
| H148  | -3.519545602 | -7.541862232  | -6.875078628 |
| H149  | -1.409464729 | -7.123962620  | -7.814410345 |
| H150  | -0.977925224 | -8.674728916  | -7.099073134 |
| H151  | -4.008630463 | -6.116014077  | -4.486325796 |
| H152  | -3.472949803 | -9.629222803  | -4.843991227 |
| H153  | -5.153250953 | -7.215490335  | -5.298544562 |
| H154  | -3.357986098 | -11.283253166 | -3.215235230 |
| H155  | -1.362571583 | -8.988527183  | -3.396417401 |
| H156  | -4.412543496 | -10.304259816 | -2.167171007 |
| H157  | -0.873186764 | -5.012059745  | -0.142000412 |
| H158  | -1.487210826 | -6.744547614  | -2.371927956 |
| H159  | 0.672857899  | -8.606416088  | -2.321355390 |
| H160  | -4.995245505 | -6.432429835  | 1.749614863  |
| H161  | -3.686675560 | -7.248028198  | -0.692170782 |
| H162  | 0.182763884  | -9.645377341  | -0.960357012 |
| H163  | -2.231304230 | -4.840815844  | -1.279295945 |
| H164  | -2.851927712 | -9.284955634  | 1.047248707  |
| H165  | -5.301246488 | -7.921299449  | 0.813454648  |
| H166  | 1.506440026  | -5.103023494  | 1.529604574  |
| H167  | 1.386324293  | -3.452467950  | 0.864615023  |
| H168  | 2.334646482  | -3.743093611  | 2.332786776  |
| H169  | -0.714279519 | -4.071278315  | 2.068129267  |
| H170  | -2.202672052 | -10.955870084 | 2.495946341  |
| H171  | -3.607349860 | -2.821251731  | 3.020499752  |
| H172  | -3.555497468 | -6.771360409  | 5.136018121  |

|      |               |               |               |
|------|---------------|---------------|---------------|
| H173 | -5.997416630  | -4.613900929  | 6.197628844   |
| H174 | 0.043749957   | -1.684518603  | 2.021630734   |
| H175 | 0.893372171   | -1.907158653  | 3.553386052   |
| H176 | 3.733564047   | 1.573549718   | 9.570336758   |
| H177 | -5.357663598  | -2.541781130  | 3.144781867   |
| H178 | -6.710267509  | -3.538717188  | 4.971545451   |
| H179 | -4.254910709  | -1.785832431  | 4.323880204   |
| H180 | -5.661245623  | -2.867885321  | 6.245793997   |
| H181 | -4.776742185  | -4.803368634  | 4.023053074   |
| H182 | -3.049971687  | -3.243456507  | 6.019519944   |
| H183 | -2.382924478  | -4.817634291  | 3.635082672   |
| H184 | -0.881565688  | -2.034877125  | 3.502056456   |
| H185 | -2.542295925  | 3.121166128   | 3.081473368   |
| H186 | -3.982145500  | 2.419261769   | 3.874491018   |
| H187 | -2.713638770  | 3.449700839   | 5.447649670   |
| H188 | -2.479222580  | 1.493747407   | 7.128788267   |
| H189 | -0.090941343  | 3.708984637   | 5.725795300   |
| H190 | 2.348536354   | 3.378655927   | 5.997836225   |
| H191 | 1.602987523   | -0.127813806  | 8.404205573   |
| H192 | -0.620435120  | -6.420955250  | 3.099327793   |
| H193 | 1.741194333   | -8.601815834  | 2.863133482   |
| H194 | 1.147167043   | -8.984288957  | 4.493593901   |
| H195 | -0.512444980  | -8.553807562  | 2.074103594   |
| H196 | -3.202454183  | -10.238941582 | 3.783380012   |
| H197 | -0.838034231  | 0.180823815   | 8.095620207   |
| H198 | 1.146301276   | -4.453432687  | 4.459285467   |
| H199 | -4.742597175  | -7.564150443  | 7.534003815   |
| H200 | -3.613136046  | -8.546694411  | 6.567330249   |
| H201 | -1.732504298  | -7.104412063  | 7.954014319   |
| H202 | 11.319666335  | -2.398449527  | 7.650988642   |
| H203 | 4.142165164   | -1.977717975  | -5.624759051  |
| H204 | 6.469336416   | -5.822866367  | -1.591532885  |
| H205 | 5.056560137   | 0.261514158   | -9.425315592  |
| H206 | 5.628036363   | 1.763280052   | -8.648047249  |
| H207 | 2.861924614   | 0.440358246   | -8.423418151  |
| H208 | -0.084021149  | 5.645451640   | -8.700976973  |
| H209 | 3.387594594   | 2.010644163   | -10.373624154 |
| H210 | -0.089830638  | -1.316342174  | -4.349738756  |
| H211 | 1.091237013   | -4.131597845  | -4.652070749  |
| H212 | 1.560956661   | 3.788294015   | -7.814556927  |
| H213 | -0.802957895  | 3.250149083   | -9.510298559  |
| H214 | 3.670590881   | 4.055357753   | -8.267525676  |
| H215 | 3.773044279   | -2.726905529  | -4.069596520  |
| H216 | 3.350869110   | 1.736189823   | -7.328715435  |
| H217 | 4.739012309   | 3.643609876   | -9.449709202  |
| H218 | -1.268093604  | -3.201791856  | -7.275149096  |
| H219 | -0.564870909  | -2.598168970  | -3.229999485  |
| H220 | 6.247026224   | 1.696648996   | -6.585821598  |
| H221 | 1.672776727   | -3.088500354  | -3.362078844  |
| H222 | -5.210364676  | -1.530823453  | 0.647313015   |
| H223 | -2.641714224  | -1.313905276  | -0.204315498  |
| H224 | -6.944997331  | -5.088804538  | -1.903750404  |
| H225 | -5.043849710  | -3.586301168  | -3.654250176  |
| H226 | -8.176398581  | -1.626163393  | -1.178758478  |
| H227 | -13.100270789 | -0.717000930  | 0.742299607   |
| H228 | -9.696240580  | -2.381228349  | 1.502372505   |
| H229 | -10.782215422 | -2.176395948  | -1.040315386  |
| H230 | -9.653004545  | 0.407046979   | 0.204364238   |
| H231 | -13.959320482 | 1.622094653   | -2.679392055  |
| H232 | -5.497635691  | 0.902247663   | 0.065780968   |
| H233 | -6.033255302  | 0.459794905   | -1.556029740  |
| H234 | -14.776703994 | 0.828551032   | -0.394907217  |
| H235 | -10.093836177 | -0.886122098  | -2.033917992  |
| H236 | -5.934118769  | -1.957112314  | -2.176835168  |
| H237 | -5.188501488  | -5.286832817  | -1.854280067  |
| H238 | -7.726717656  | -2.927314504  | -5.824802562  |
| H239 | -1.627926073  | 1.822011958   | -2.877301633  |
| H240 | -6.704764995  | -4.285591434  | -6.330538628  |
| H241 | 4.181329080   | 3.915770493   | 9.607046047   |
| H242 | 3.048860762   | 3.742044135   | 8.440740777   |
| H243 | -2.787725872  | 5.583443606   | 2.357497976   |
| H244 | -4.823931526  | 3.511270844   | 1.998402633   |
| H245 | -4.671819035  | 6.430409346   | 4.008112422   |

|      |               |              |              |
|------|---------------|--------------|--------------|
| H246 | -4.209643977  | 1.939943467  | -2.461515693 |
| H247 | -5.466712787  | 2.621326514  | -4.001606690 |
| H248 | -6.324059941  | 3.010531324  | -2.720556254 |
| H249 | -3.495485802  | 1.262359403  | -5.758407439 |
| H250 | -4.588074353  | 0.474389743  | -6.934829285 |
| H251 | -8.093715321  | 9.421440504  | 2.190753758  |
| H252 | -9.813983967  | 9.317722620  | 1.719875479  |
| H253 | -6.508926663  | 8.100967438  | 1.023064023  |
| H254 | -7.006782851  | 6.852909027  | -0.080340205 |
| H255 | -6.352817976  | 8.739729819  | -2.882551393 |
| H256 | -3.019121806  | 5.706862096  | -4.006980859 |
| H257 | -10.551993283 | 3.072605023  | -2.172302857 |
| H258 | -8.280815907  | 3.536641302  | 2.230471120  |
| H259 | -7.267312133  | 5.357724802  | -2.479698111 |
| H260 | -1.541954641  | 6.018537313  | -0.083912978 |
| H261 | -2.082711911  | 7.699002695  | 1.612409677  |
| H262 | -3.121378649  | 4.647020348  | -1.524650351 |
| H263 | -4.803278350  | -2.922514063 | -6.171670698 |
| H264 | -2.877254131  | 10.725286120 | 2.294207786  |
| H265 | -2.548415782  | -1.174439974 | -6.327045686 |
| H266 | -1.856744525  | 7.427002921  | -1.098120350 |
| H267 | -6.954006006  | 3.645435928  | 0.155512226  |
| H268 | -6.211682348  | 0.849445873  | -5.085881603 |
| H269 | -3.930147643  | 9.953713840  | 3.500562599  |
| H270 | -4.768580257  | 8.432658263  | -3.478822035 |
| H271 | -7.848262668  | 6.974946033  | -2.733413632 |
| H272 | 0.004651367   | -2.273374849 | -6.725773279 |
| H273 | -1.308696829  | -4.015147675 | -5.133960556 |
| H274 | -11.897399499 | 3.084932793  | -0.092657478 |
| H275 | -4.152520907  | -0.389272987 | -4.021221371 |
| H276 | -4.258688368  | 7.428493398  | -0.392786084 |
| H277 | -3.216664986  | 7.225589561  | -3.139133557 |
| H278 | -1.636016448  | 5.230384410  | -2.255295612 |
| H279 | -5.097306557  | 4.872556317  | -3.031974335 |
| H280 | -6.635628707  | 5.386380405  | 5.822997465  |
| H281 | -7.387193154  | 6.824998925  | 2.924360131  |
| H282 | -9.438871742  | 8.593357031  | 4.050871111  |
| H283 | -5.806773433  | 6.956839188  | 5.886004741  |
| H284 | -9.473886896  | 5.345140097  | 3.241728642  |
| H285 | 7.704869685   | 5.757553776  | -4.743552582 |
| H286 | 8.445917768   | 4.172613609  | -4.451500162 |
| H287 | 10.125741593  | 3.038217535  | -0.404147299 |
| H288 | 9.756204487   | 5.328192815  | -6.064062821 |
| H289 | 8.935296306   | 4.191602299  | -6.911023360 |
| H290 | 0.584320034   | 5.983697422  | 4.687325797  |
| H291 | -1.580383687  | 7.080095659  | 6.612807864  |
| H292 | -1.048545601  | 9.571345481  | 3.144596143  |
| H293 | -1.163859953  | 5.581445388  | 4.662632029  |
| H294 | -0.881417435  | 8.555372347  | 6.716641772  |
| H295 | 3.613826662   | 8.410704435  | -0.711020472 |
| H296 | 0.083975406   | 8.376531012  | 4.574185633  |
| H297 | 6.846838008   | -5.192263171 | 4.900277794  |
| H298 | 9.371367899   | -3.742095864 | 3.935639515  |
| H299 | 3.386814654   | 6.740321578  | -2.226635078 |
| H300 | 2.146857197   | 0.071439618  | 5.222362961  |
| H301 | 1.825508275   | 6.780678562  | -5.445765774 |
| H302 | 1.915835629   | 0.517562363  | -4.600074127 |
| H303 | 0.826912535   | 6.039253906  | -4.197035669 |
| H304 | 4.660511222   | -3.738414531 | 4.530239773  |
| H305 | 3.207692825   | 5.098940053  | -3.372975466 |
| H306 | 5.294278075   | -3.168422334 | 2.983968314  |
| H307 | 7.194909467   | -4.656549830 | 3.243196471  |
| H308 | 7.311190319   | -2.240347545 | 4.133796249  |
| H309 | 6.714729624   | -2.845795900 | 5.692209685  |
| H310 | -1.183333038  | 1.494244471  | -8.026731365 |
| H311 | 8.946738123   | -6.628454578 | 4.640362545  |
| H312 | 10.446275354  | -7.796659602 | 2.214886578  |
| H313 | 1.528614867   | 2.235926240  | -2.839274198 |
| H314 | 10.527320249  | -8.576707480 | 5.022197079  |
| H315 | 9.811150335   | -9.320562751 | 3.750479786  |
| H316 | 5.061314041   | -0.884702961 | 3.715517976  |
| H317 | -0.139717336  | 4.020321035  | -3.205633061 |
| H318 | 0.620103694   | 0.586682578  | -6.717113905 |

|       |               |              |              |
|-------|---------------|--------------|--------------|
| H319  | 12.328386015  | -2.404510963 | 0.612565201  |
| H320  | 10.748724096  | 0.101832875  | -1.023988988 |
| H321  | 10.044542787  | -2.636320056 | 1.451967905  |
| H322  | 12.596710126  | -2.471311224 | -0.903695670 |
| H323  | 4.141371526   | 9.798222361  | -3.061322200 |
| H324  | 7.890460945   | -0.409148229 | 2.109377959  |
| H325  | 6.429327708   | -4.387005939 | -0.018795138 |
| H326  | 5.725534861   | 4.835454458  | -4.018744654 |
| H327  | 8.400205016   | -4.218583172 | -1.604975128 |
| H328  | 8.765411593   | 1.222259804  | -5.350415104 |
| H329  | 6.642868661   | 0.686544691  | -4.056638963 |
| H330  | 11.823333351  | -7.649380781 | 3.312292289  |
| H331  | 3.336501801   | 0.466630958  | 4.021627616  |
| H332  | 9.515544530   | -0.715578728 | 3.889205013  |
| H333  | 7.511953713   | 0.718992324  | 3.108945129  |
| H334  | 10.017316900  | -2.377893240 | 5.526066233  |
| H335  | 3.424428268   | -3.084329539 | 6.043610529  |
| H336  | 10.859466842  | -4.226717009 | -4.565375665 |
| H337  | 8.895042937   | -1.619481312 | -3.144609243 |
| H338  | 9.625538899   | -1.933228509 | -1.558941637 |
| H339  | 7.528655726   | -3.626183255 | -3.044110871 |
| H340  | 4.092871974   | 3.054381193  | -4.158709156 |
| H341  | -1.445264748  | 4.116863873  | -5.347483848 |
| H342  | -2.211727787  | 2.821664232  | -7.431899046 |
| H343  | 5.188051063   | -3.096283664 | -0.113850161 |
| H344  | 10.639159253  | -1.657892194 | 3.383405782  |
| H345  | 11.028880677  | -3.550903634 | 2.238997183  |
| H346  | 1.958849429   | -2.173490628 | 5.996156588  |
| H347  | 10.793128209  | 1.501414761  | -3.797842641 |
| H348  | 9.340685882   | 0.663811866  | -0.121306307 |
| H349  | 4.408763020   | 2.957793681  | -5.914842463 |
| H350  | 1.958478553   | 8.933292958  | -1.094526619 |
| H351  | 3.895285412   | 0.349565507  | 7.455046006  |
| H352  | 4.184839723   | 1.849080189  | 6.543789042  |
| H353  | 12.303261259  | 3.433774464  | -1.183568390 |
| H354  | 12.592785498  | 1.854015405  | -1.492159490 |
| H355  | 13.412916583  | -0.173519749 | 2.413438352  |
| H356  | 12.198014856  | 0.120577393  | 0.499311929  |
| H357  | 14.013174083  | 2.486150081  | 2.008075256  |
| H358  | 12.009230204  | 0.513542182  | 3.260751214  |
| H359  | 6.325124030   | 2.478475849  | 8.167339412  |
| H360  | -12.021716619 | 5.154463004  | 4.976798867  |
| H361  | 10.147136794  | -3.587321872 | 8.280484225  |
| H362  | 8.395247135   | -1.484517588 | 7.887794461  |
| H363  | -12.100198644 | 5.229759909  | 1.958823110  |
| H364  | -10.443352574 | 3.031289292  | 3.344337526  |
| H365  | -11.918867445 | 2.774670660  | 2.399221725  |
| H366  | -8.475979877  | 3.306028311  | -3.063945063 |
| H367  | -0.725180163  | 0.004018739  | -1.353497888 |
| Mo368 | 6.105850692   | 0.241864473  | -0.799071944 |
| N369  | 0.431667444   | -7.154299699 | -6.810878422 |
| N370  | -3.181951548  | -7.432409003 | -5.921933876 |
| N371  | -3.676113097  | -9.340432796 | -3.890129265 |
| N372  | -1.271573803  | -9.339468341 | -2.443611506 |
| N373  | -1.258473656  | -6.678256626 | -1.378843071 |
| N374  | -3.582192256  | -6.891471236 | 0.261108131  |
| N375  | -3.008293522  | -9.093528446 | 2.040194406  |
| N376  | -0.341331126  | -8.749057123 | 3.064757069  |
| N377  | 0.156704281   | -6.052393651 | 3.645253762  |
| N378  | -2.182347998  | -4.461414607 | 4.572594084  |
| N379  | -3.515761290  | -6.526055465 | 6.128352158  |
| N380  | 9.981947848   | -8.407863198 | 4.174580664  |
| N381  | 9.362919943   | -5.796288654 | 4.208056630  |
| N382  | 4.676678391   | -1.653380344 | 4.273431469  |
| N383  | 2.882977482   | -2.344270850 | 5.610727356  |
| N384  | 2.836876987   | -0.271969395 | 4.556790239  |
| N385  | 9.821801965   | -3.042262587 | 6.306097832  |
| N386  | -1.006227806  | -2.471345227 | -6.609630602 |
| N387  | 3.458643205   | -2.384857132 | -4.978954958 |
| N388  | -3.149694698  | -1.415494585 | -5.521790776 |
| N389  | -5.654402363  | -2.594759665 | -5.719662851 |
| N390  | -5.934283385  | -3.997784587 | -3.346130481 |
| N391  | -5.914412839  | -2.217472093 | -1.192049821 |

|      |               |               |               |
|------|---------------|---------------|---------------|
| N392 | -3.559657912  | 1.205835060   | -2.086391705  |
| N393 | -1.760400871  | 0.132647900   | -1.540763619  |
| N394 | -8.311749926  | -1.142694417  | -0.294394356  |
| N395 | -12.208526540 | 0.439256310   | -2.253737784  |
| N396 | -13.886630625 | 0.560667648   | -0.807143605  |
| N397 | 4.022805838   | 3.528143952   | 8.673507108   |
| N398 | -0.750023056  | 7.613912377   | 6.335495647   |
| N399 | -1.966298336  | 9.220253783   | 3.405314981   |
| N400 | -2.999407722  | 7.892753151   | 1.178463624   |
| N401 | -4.833766967  | 5.873211429   | -3.021807606  |
| N402 | -5.573624075  | 8.093708816   | -2.962197494  |
| N403 | -7.059226429  | 6.352272671   | -2.587302517  |
| N404 | -3.726676437  | 5.277969921   | 2.049852763   |
| N405 | -5.551080317  | 5.911381348   | 4.104652139   |
| N406 | -8.067855845  | 7.104710638   | 3.633346844   |
| N407 | -7.267360645  | 7.520199673   | 0.644701312   |
| N408 | -10.396881953 | 5.734480940   | 3.062920413   |
| N409 | 8.823715867   | 5.066603229   | -6.391246495  |
| N410 | 5.622634354   | 4.289187405   | -4.879385981  |
| N411 | 2.830695226   | 5.380484115   | -4.296889153  |
| N412 | 2.878582680   | 7.600361440   | -2.470907380  |
| N413 | 3.742364801   | 3.712620876   | -9.233422636  |
| N414 | 0.991987365   | 3.324809630   | -8.530303633  |
| N415 | 11.852709454  | 2.563002678   | -1.479895111  |
| N416 | 7.907229665   | 0.802879908   | -2.316563035  |
| N417 | 8.727008419   | 1.145941097   | -4.337655478  |
| N418 | 12.140244709  | 0.889984525   | 1.166314355   |
| N419 | -2.756782260  | 2.206098944   | 0.841517797   |
| N420 | -1.923069739  | 2.702638912   | 0.299175755   |
| O421 | -1.379075372  | -7.079911760  | -4.575560234  |
| O422 | -4.350033410  | -7.643785350  | -2.524064606  |
| O423 | -2.373492385  | -10.266714322 | -0.665832957  |
| O424 | -0.131326593  | -7.548958567  | 0.394361148   |
| O425 | -2.597381132  | -5.393865105  | 1.659211293   |
| O426 | -4.186223508  | -7.924250789  | 3.607540077   |
| O427 | -0.976610686  | -9.961310030  | 4.908847723   |
| O428 | 2.176334841   | -6.577829751  | 4.610590737   |
| O429 | -0.593773527  | -3.740309165  | 6.051194399   |
| O430 | -3.580855086  | -4.936782507  | 7.750577227   |
| O431 | -2.915105823  | -8.066820332  | 9.310634363   |
| O432 | 11.126042715  | -5.213478160  | 2.825487419   |
| O433 | 8.908303111   | -5.059907874  | 6.921506047   |
| O434 | 9.854503932   | -0.871460824  | 9.174227822   |
| O435 | -3.192314188  | -2.848838801  | -3.731234945  |
| O436 | 1.780912220   | -1.980242158  | -6.455468834  |
| O437 | -6.616800352  | -0.889953512  | -4.541679261  |
| O438 | -5.499381505  | 1.484878802   | -5.347662761  |
| O439 | -8.055879871  | -4.662011819  | -3.933906275  |
| O440 | -5.877030498  | -3.940385835  | 0.311614596   |
| O441 | -7.304560284  | -0.365243144  | 1.602529207   |
| O442 | -10.835970894 | -0.828637482  | 2.180261453   |
| O443 | 6.181160491   | 0.813894397   | 9.342027597   |
| O444 | -1.959557857  | 2.199328084   | 6.701545751   |
| O445 | -3.147359341  | 7.694522681   | 4.615217318   |
| O446 | -4.934311388  | 9.127962251   | 1.292310199   |
| O447 | -5.200436544  | 5.230134095   | 0.293548601   |
| O448 | -6.509950923  | 3.844914581   | 3.873669623   |
| O449 | -3.147415452  | 4.082789562   | 4.837416208   |
| O450 | -8.400981726  | 7.410450519   | 5.880534828   |
| O451 | -11.605984176 | 7.664652470   | 2.874785609   |
| O452 | -9.465270811  | 7.369359866   | 0.033701537   |
| O453 | -13.613492653 | 4.404022415   | 3.943147446   |
| O454 | -7.890465099  | 3.440754691   | -2.293401254  |
| O455 | 6.725192216   | 3.281776132   | -6.625350364  |
| O456 | 2.770614201   | 4.806404559   | -6.517040640  |
| O457 | 1.320778754   | 8.666900816   | -3.737159417  |
| O458 | 3.338369284   | 11.084621355  | -1.695104870  |
| O459 | 0.924617519   | 1.866504917   | -10.282861902 |
| O460 | 5.202389130   | -1.136360472  | -7.211375939  |
| O461 | 6.116759550   | 0.718282038   | -6.376536583  |
| O462 | -1.838599264  | 5.315182531   | -7.718670334  |
| O463 | 11.345358985  | 2.922142836   | 1.772796273   |
| O464 | 13.923065961  | 2.142881217   | 4.018990152   |

|      |              |              |              |
|------|--------------|--------------|--------------|
| O465 | 4.273298645  | -3.923827567 | -2.437631828 |
| O466 | 5.721746460  | -5.590392175 | -2.175156540 |
| O467 | 11.544639550 | -3.118495757 | -2.685134512 |
| O468 | 10.041190844 | -3.805045092 | -4.225607514 |
| O469 | 7.664248814  | -0.887242900 | 0.356420110  |
| O470 | 8.473744578  | -2.956936316 | 0.730145114  |
| O471 | 6.368635152  | -1.562049390 | -1.825632979 |
| O472 | 10.332486374 | -1.181554245 | 4.199479061  |
| O473 | 7.939268396  | -0.157937019 | 3.067157466  |
| O474 | -5.419400071 | 3.069183930  | -3.113567763 |
| O475 | 13.023204641 | -2.203325616 | -0.064400473 |
| O476 | 10.947513098 | -2.630034673 | 1.876743883  |
| S477 | -0.398259483 | 6.228421060  | 2.461048967  |
| S478 | 1.009816726  | 4.354963937  | -0.566002344 |
| S479 | 4.570925750  | 1.075553736  | -2.424066888 |
| S480 | 1.017819600  | 2.585056467  | 2.563584442  |
| S481 | 1.238544298  | 0.378313612  | -0.607678836 |
| S482 | 4.709890512  | 4.840284610  | -1.594483877 |
| S483 | 4.587639254  | -0.642720093 | 0.844588356  |
| S484 | 3.290056310  | 5.375094236  | 2.012300703  |
| S485 | 6.824765884  | 2.239270672  | 0.301047798  |
| S486 | 4.842620976  | 2.097043786  | 3.487719587  |

**Structure A, 35(3/2)**

|                          |                                         |
|--------------------------|-----------------------------------------|
| A, 35(3/2)<br>associated | bm22n2xd35td.car_2                      |
| C1                       | -1.849981071 -7.330177219 -5.712980393  |
| C2                       | -0.962578610 -7.593336296 -6.935259201  |
| C3                       | -4.152370796 -7.152067754 -4.871981690  |
| C4                       | -4.065634333 -8.071558238 -3.656139104  |
| C5                       | -3.507837852 -10.285449840 -2.783781364 |
| C6                       | -2.333125283 -9.949944589 -1.858547831  |
| C7                       | -0.156877333 -8.847495106 -1.638706948  |
| C8                       | -0.513794426 -7.629777999 -0.782189552  |
| C9                       | -1.739641205 -5.531446859 -0.603494670  |
| C10                      | -2.685448838 -5.925384960 0.541734337   |
| C11                      | -4.530442516 -7.309458171 1.296019029   |
| C12                      | -3.883892625 -8.121316607 2.425923857   |
| C13                      | -2.455493854 -10.016324664 3.017544005  |
| C14                      | -1.187741566 -9.566232400 3.754640269   |
| C15                      | 0.964293348 -8.387955255 3.594542864    |
| C16                      | 1.151121405 -6.924291795 4.004439317    |
| C17                      | 0.193565130 -4.638443780 3.945253694    |
| C18                      | -0.895564854 -4.263945651 4.967319178   |
| C19                      | 0.157709184 -3.773607021 2.657144179    |
| C20                      | 0.007224701 -2.281478244 2.974130416    |
| C21                      | 1.406321133 -4.029980232 1.804386335    |
| C22                      | -3.304371899 -4.167650594 5.477532830   |
| C23                      | -3.482535322 -5.243011781 6.565727775   |
| C24                      | -4.599789355 -3.918674276 4.667428745   |
| C25                      | -5.805908948 -3.721453963 5.593405440   |
| C26                      | -4.434836082 -2.708464867 3.738254181   |
| C27                      | -3.754093295 -7.590562356 7.113851755   |
| C28                      | -2.730126893 -7.590333979 8.230935608   |
| C29                      | 10.721837095 -7.536074216 3.232430049   |
| C30                      | 10.415703627 -6.047255018 3.406422988   |
| C31                      | 8.852430588 -4.467968776 4.557149272    |
| C32                      | 9.192434678 -4.215837833 6.039240968    |
| C33                      | 7.337269563 -4.395121744 4.298451482    |
| C34                      | 6.716718590 -3.027695004 4.602004069    |
| C35                      | 5.284699334 -2.955838148 4.069081416    |
| C36                      | 3.470101357 -1.404031756 4.826770594    |
| C37                      | 10.245876564 -2.687193722 7.637936652   |
| C38                      | 9.410661517 -1.599999825 8.282373259    |
| C39                      | -1.264801360 -2.927093156 -5.240203016  |
| C40                      | -2.630010671 -2.415483169 -4.753743047  |
| C41                      | -0.194360121 -2.417902964 -4.249780990  |
| C42                      | 1.195501957 -3.076877394 -4.358497086   |
| C43                      | 2.157954829 -2.422927590 -5.347801374   |
| C44                      | -4.292423749 -0.644293455 -5.075126888  |
| C45                      | -5.626538914 -1.394068998 -5.103226955  |

|      |               |              |              |
|------|---------------|--------------|--------------|
| C46  | -4.422478307  | 0.687667619  | -5.842624207 |
| C47  | -6.817095881  | -3.467320689 | -5.593880640 |
| C48  | -7.000044636  | -4.090990913 | -4.203509038 |
| C49  | -5.999216853  | -4.537800208 | -2.001233922 |
| C50  | -5.923033014  | -3.531005425 | -0.853941246 |
| C51  | -5.882334781  | -1.172893014 | -0.156843438 |
| C52  | -7.258237329  | -0.888489282 | 0.491453951  |
| C53  | -5.386635841  | 0.173872881  | -0.701882046 |
| C54  | -3.964350435  | 0.241569720  | -1.157288799 |
| C55  | -2.828295315  | -0.470564219 | -0.858844138 |
| C56  | -2.237521720  | 1.192561443  | -2.207171136 |
| C57  | -9.677124000  | -0.710999253 | 0.058155480  |
| C58  | -10.126811938 | -1.400682643 | 1.342154704  |
| C59  | -10.625498472 | -1.087110140 | -1.112111317 |
| C60  | -11.918724181 | -0.330880787 | -1.172455339 |
| C61  | -12.956834556 | -0.258486089 | -0.262888152 |
| C62  | -13.412566606 | 0.966841754  | -2.051471210 |
| C63  | 4.197398316   | 2.074307316  | 8.708420259  |
| C64  | 5.682492602   | 1.763632879  | 8.747953458  |
| C65  | 3.641066144   | 1.419755293  | 7.416801149  |
| C66  | 2.151327396   | 1.610982815  | 7.248449401  |
| C67  | 1.229214808   | 0.715571476  | 7.819798663  |
| C68  | 1.643648191   | 2.692172256  | 6.504380322  |
| C69  | -0.150284016  | 0.884411817  | 7.652562467  |
| C70  | 0.271105141   | 2.880511350  | 6.339464325  |
| C71  | -0.625249648  | 1.973328044  | 6.909628611  |
| C72  | -0.732566118  | 7.702849139  | 4.877649468  |
| C73  | -2.061422436  | 8.196087212  | 4.292770704  |
| C74  | -0.386605705  | 6.318131055  | 4.305529718  |
| C75  | -3.159974021  | 9.766390260  | 2.758009089  |
| C76  | -3.775245682  | 8.878866285  | 1.674405043  |
| C77  | -3.470515302  | 6.937108208  | 0.183460990  |
| C78  | -4.193464551  | 5.731860952  | 0.822092099  |
| C79  | -2.293855037  | 6.520041670  | -0.718781450 |
| C80  | -2.597983706  | 5.573622384  | -1.884470250 |
| C81  | -3.388205876  | 6.155344778  | -3.073288244 |
| C82  | -5.806855668  | 6.782849072  | -2.899935638 |
| C83  | -4.370325751  | 4.147199524  | 2.673162107  |
| C84  | -5.557743421  | 4.582415361  | 3.557783968  |
| C85  | -3.418982566  | 3.299113389  | 3.524811869  |
| C86  | -6.357169934  | 6.216083847  | 5.193840821  |
| C87  | -7.675763359  | 6.938553471  | 4.925360341  |
| C88  | -9.212716119  | 7.878098807  | 3.240131000  |
| C89  | -10.526127016 | 7.084750955  | 3.060192824  |
| C90  | -8.916442867  | 8.722193724  | 1.977244663  |
| C91  | -8.592563662  | 7.839035626  | 0.778334287  |
| C92  | -11.551427422 | 4.858755325  | 2.828983965  |
| C93  | -12.500333438 | 4.823096744  | 4.023715065  |
| C94  | -11.063456449 | 3.421590759  | 2.500588459  |
| C95  | -10.234802425 | 3.362858254  | 1.238082900  |
| C96  | -10.847438837 | 3.219373407  | -0.015825963 |
| C97  | -8.836522046  | 3.485859194  | 1.282540914  |
| C98  | -10.095153820 | 3.224853061  | -1.193306201 |
| C99  | -8.068776186  | 3.516529243  | 0.115371304  |
| C100 | -8.712396271  | 3.393736863  | -1.114194329 |
| C101 | 7.960699420   | 4.803459386  | -5.204572304 |
| C102 | 6.703402917   | 4.068037534  | -5.637037901 |
| C103 | 4.319286863   | 3.641975595  | -5.080542445 |
| C104 | 3.217822806   | 4.665177613  | -5.380493730 |
| C105 | 1.821986482   | 6.439235713  | -4.419346448 |
| C106 | 1.987719959   | 7.660346572  | -3.518361577 |
| C107 | 2.921255524   | 8.704200705  | -1.532917077 |
| C108 | 3.549173088   | 9.949894447  | -2.124217369 |
| C109 | 3.105637450   | 2.378022670  | -9.375072426 |
| C110 | 1.576161827   | 2.482534358  | -9.442986287 |
| C111 | 3.510929073   | 1.307394080  | -8.334586500 |
| C112 | 4.978870458   | 0.876436274  | -8.516551702 |
| C113 | 5.441134137   | 0.058276960  | -7.331959841 |
| C114 | -0.465164817  | 3.449407380  | -8.487360012 |
| C115 | -0.836592970  | 4.908048384  | -8.291812180 |
| C116 | -1.169959575  | 2.466400279  | -7.518785898 |
| C117 | -0.493169367  | 2.370870486  | -6.173681114 |
| C118 | -0.719232947  | 3.329120074  | -5.170628259 |

|       |              |               |              |
|-------|--------------|---------------|--------------|
| C119  | 0.452454932  | 1.359719770   | -5.932052846 |
| C120  | 0.004057401  | 3.287336950   | -3.972644129 |
| C121  | 1.175025568  | 1.319040660   | -4.734535159 |
| C122  | 0.960307652  | 2.289945635   | -3.752681914 |
| C123  | 10.820366292 | 2.206683669   | -0.501301564 |
| C124  | 11.427927322 | 2.044748626   | 0.901340793  |
| C125  | 10.044737871 | 0.952758784   | -0.938537750 |
| C126  | 9.271948754  | 1.069912230   | -2.216246062 |
| C127  | 9.780989836  | 1.291377077   | -3.481090625 |
| C128  | 7.611039571  | 0.871474353   | -3.620861397 |
| C129  | 12.722081978 | 0.715958600   | 2.473726984  |
| C130  | 13.601229093 | 1.882700295   | 2.869841333  |
| C131  | 5.258547253  | -4.382543604  | -1.818286931 |
| C132  | 5.950183722  | -3.664906656  | -0.692996687 |
| C133  | 7.007771119  | -2.603479221  | -1.196794225 |
| C134  | 8.054984913  | -3.308301102  | -2.108667059 |
| C135  | 9.251084667  | -2.408228722  | -2.457422014 |
| C136  | 10.409524553 | -3.131053225  | -3.088522741 |
| C137  | 7.765305501  | -2.120090825  | 0.077209973  |
| C138  | 3.510348400  | 2.468200364   | 0.416152072  |
| Fe139 | 4.971191112  | 2.740869767   | -0.971351601 |
| Fe140 | 1.282565213  | 2.310876228   | 0.426379629  |
| Fe141 | 3.380216869  | 3.188619139   | 2.312635880  |
| Fe142 | 3.270570144  | 4.420275434   | 0.023392510  |
| Fe143 | 1.300405454  | 4.714922525   | 1.845855204  |
| Fe144 | 4.967907004  | 1.498906056   | 1.290067819  |
| Fe145 | 3.411432899  | 0.757481294   | -0.512330620 |
| H146  | 0.821403661  | -7.505451489  | -5.951802513 |
| H147  | 0.463205365  | -6.136857512  | -6.766436399 |
| H148  | -3.532444244 | -7.560574227  | -6.876000096 |
| H149  | -1.423935446 | -7.135254901  | -7.824412490 |
| H150  | -0.983609536 | -8.683761786  | -7.109406733 |
| H151  | -4.017876786 | -6.129447318  | -4.492054740 |
| H152  | -3.473698209 | -9.641702720  | -4.836739799 |
| H153  | -5.161811577 | -7.234372492  | -5.297195542 |
| H154  | -3.352310867 | -11.288695371 | -3.202245398 |
| H155  | -1.363035962 | -8.987459141  | -3.391694320 |
| H156  | -4.408826567 | -10.307981437 | -2.156993582 |
| H157  | -0.894970798 | -4.999332715  | -0.148055518 |
| H158  | -1.498946433 | -6.741841561  | -2.369656543 |
| H159  | 0.669996655  | -8.593401448  | -2.316488980 |
| H160  | -5.004340422 | -6.432383317  | 1.755935412  |
| H161  | -3.697487043 | -7.252447901  | -0.686660007 |
| H162  | 0.183995107  | -9.632097578  | -0.953048415 |
| H163  | -2.253737204 | -4.840554767  | -1.286664601 |
| H164  | -2.855765343 | -9.278934931  | 1.052477238  |
| H165  | -5.308768231 | -7.924531639  | 0.822813642  |
| H166  | 1.509743569  | -5.093232242  | 1.542411068  |
| H167  | 1.359605688  | -3.446894962  | 0.872216287  |
| H168  | 2.317283943  | -3.716121737  | 2.338182284  |
| H169  | -0.726816707 | -4.091049195  | 2.081034711  |
| H170  | -2.219166600 | -10.957070091 | 2.499866182  |
| H171  | -3.605260022 | -2.840714966  | 3.028985943  |
| H172  | -3.554822525 | -6.780681310  | 5.156596712  |
| H173  | -5.997350869 | -4.601925796  | 6.223057648  |
| H174  | 0.001567057  | -1.694235693  | 2.043258067  |
| H175  | 0.849685131  | -1.912500555  | 3.577117315  |
| H176  | 3.725307162  | 1.575493849   | 9.576810730  |
| H177  | -5.353964425 | -2.554695376  | 3.154368083  |
| H178  | -6.707023549 | -3.529896226  | 4.992709621  |
| H179  | -4.246893925 | -1.796646064  | 4.328722471  |
| H180  | -5.649848814 | -2.858157488  | 6.259169871  |
| H181  | -4.784573230 | -4.813411471  | 4.045711722  |
| H182  | -3.044660868 | -3.254315730  | 6.032570551  |
| H183  | -2.389492607 | -4.821670634  | 3.644565290  |
| H184  | -0.924643410 | -2.066544552  | 3.519023637  |
| H185  | -2.539460619 | 3.033986712   | 2.914370182  |
| H186  | -3.958336107 | 2.373658146   | 3.785916452  |
| H187  | -2.659594757 | 3.380098685   | 5.330640231  |
| H188  | -2.491568614 | 1.477619953   | 7.110684608  |
| H189  | -0.103325056 | 3.710302823   | 5.739384370  |
| H190  | 2.335553218  | 3.382606354   | 6.016901481  |
| H191  | 1.591158356  | -0.135007741  | 8.405017334  |



|      |               |               |               |
|------|---------------|---------------|---------------|
| H192 | -0.618841023  | -6.438501956  | 3.105395889   |
| H193 | 1.748593315   | -8.613726736  | 2.856020584   |
| H194 | 1.155906967   | -8.998787291  | 4.486381969   |
| H195 | -0.510363836  | -8.555448635  | 2.072168320   |
| H196 | -3.204375883  | -10.228550566 | 3.790800131   |
| H197 | -0.851588828  | 0.168264436   | 8.088145909   |
| H198 | 1.144444860   | -4.468037176  | 4.466996522   |
| H199 | -4.761389366  | -7.547484817  | 7.560047009   |
| H200 | -3.662178317  | -8.553640752  | 6.586747206   |
| H201 | -1.745606822  | -7.136839434  | 7.970087354   |
| H202 | 11.302404982  | -2.380325569  | 7.640539148   |
| H203 | 4.135833364   | -1.973817111  | -5.615902769  |
| H204 | 6.507380293   | -5.831651234  | -1.564884339  |
| H205 | 5.062636631   | 0.255445123   | -9.419612865  |
| H206 | 5.622577745   | 1.759431073   | -8.640326446  |
| H207 | 2.864985945   | 0.420512069   | -8.427007262  |
| H208 | -0.109238873  | 5.626602588   | -8.737699881  |
| H209 | 3.381776011   | 1.994781674   | -10.368455452 |
| H210 | -0.105852657  | -1.325296272  | -4.359381911  |
| H211 | 1.088906010   | -4.134230366  | -4.658881384  |
| H212 | 1.549619689   | 3.790329461   | -7.833638403  |
| H213 | -0.818972163  | 3.214652177   | -9.510832533  |
| H214 | 3.657309141   | 4.043570235   | -8.265639021  |
| H215 | 3.767791193   | -2.741370710  | -4.069492593  |
| H216 | 3.341956943   | 1.715141200   | -7.325861305  |
| H217 | 4.727934514   | 3.633755248   | -9.447170447  |
| H218 | -1.268790389  | -3.210360431  | -7.284063156  |
| H219 | -0.575567955  | -2.607910698  | -3.236044173  |
| H220 | 6.243950192   | 1.697289208   | -6.581389500  |
| H221 | 1.659414359   | -3.092669529  | -3.362333765  |
| H222 | -5.236557926  | -1.524830627  | 0.659430410   |
| H223 | -2.671667968  | -1.335054033  | -0.224767268  |
| H224 | -6.951189463  | -5.077692138  | -1.899268724  |
| H225 | -5.055444178  | -3.575147672  | -3.652796849  |
| H226 | -8.189646099  | -1.640621686  | -1.173603848  |
| H227 | -13.106279387 | -0.697583261  | 0.717753443   |
| H228 | -9.742929833  | -2.444524833  | 1.452313932   |
| H229 | -10.798801635 | -2.176664289  | -1.096633149  |
| H230 | -9.689346896  | 0.377677605   | 0.221725414   |
| H231 | -13.966593962 | 1.625223573   | -2.714838806  |
| H232 | -5.526199131  | 0.911140250   | 0.105233299   |
| H233 | -6.044506959  | 0.489150118   | -1.528131440  |
| H234 | -14.781155672 | 0.846884971   | -0.424722012  |
| H235 | -10.091851809 | -0.864932390  | -2.048424885  |
| H236 | -5.945906486  | -1.939466879  | -2.172095637  |
| H237 | -5.195349572  | -5.273524641  | -1.851753064  |
| H238 | -7.738718985  | -2.916507629  | -5.821245610  |
| H239 | -1.634008693  | 1.869933157   | -2.806301203  |
| H240 | -6.722629684  | -4.278467556  | -6.327251431  |
| H241 | 4.175850642   | 3.917313752   | 9.606323499   |
| H242 | 3.040108236   | 3.742414795   | 8.443271799   |
| H243 | -2.757935375  | 5.546150203   | 2.304168621   |
| H244 | -4.799973036  | 3.491499009   | 1.902217823   |
| H245 | -4.659772150  | 6.386352353   | 3.945442107   |
| H246 | -4.208477040  | 2.003440524   | -2.376384177  |
| H247 | -5.484566734  | 2.625303304   | -3.973182507  |
| H248 | -6.366957930  | 3.029322292   | -2.712518069  |
| H249 | -3.491660160  | 1.260445275   | -5.733296863  |
| H250 | -4.590421009  | 0.487609912   | -6.914035292  |
| H251 | -8.087825749  | 9.408515333   | 2.206975525   |
| H252 | -9.813205536  | 9.311498341   | 1.749323443   |
| H253 | -6.514491832  | 8.100633624   | 1.018682298   |
| H254 | -7.017154394  | 6.860414744   | -0.091028451  |
| H255 | -6.345797101  | 8.756002647   | -2.933109581  |
| H256 | -3.023316243  | 5.713814940   | -4.012590006  |
| H257 | -10.584917149 | 3.087095265   | -2.160292558  |
| H258 | -8.316973508  | 3.549934819   | 2.242815750   |
| H259 | -7.273030371  | 5.386832055   | -2.474903075  |
| H260 | -1.523588897  | 6.039331055   | -0.095232596  |
| H261 | -2.074687504  | 7.710782334   | 1.605290923   |
| H262 | -3.095302354  | 4.658687428   | -1.526435534  |
| H263 | -4.816906354  | -2.920760898  | -6.173308153  |
| H264 | -2.901346860  | 10.729928523  | 2.297983045   |

|      |               |              |              |
|------|---------------|--------------|--------------|
| H265 | -2.556495406  | -1.180244796 | -6.327269067 |
| H266 | -1.842949789  | 7.445984351  | -1.113851345 |
| H267 | -6.989420342  | 3.674125870  | 0.166533398  |
| H268 | -6.206806306  | 0.848716809  | -5.057191516 |
| H269 | -3.951984709  | 9.947153972  | 3.498346136  |
| H270 | -4.756761474  | 8.437396717  | -3.514915338 |
| H271 | -7.843832027  | 6.999650732  | -2.771063718 |
| H272 | -0.002781210  | -2.276079583 | -6.728286104 |
| H273 | -1.314021482  | -4.028013601 | -5.142656380 |
| H274 | -11.930874600 | 3.092052904  | -0.080096306 |
| H275 | -4.149147891  | -0.403936141 | -4.009221085 |
| H276 | -4.243293457  | 7.447142278  | -0.407767102 |
| H277 | -3.212552096  | 7.236058530  | -3.147243786 |
| H278 | -1.620717777  | 5.250745842  | -2.270260050 |
| H279 | -5.098788462  | 4.884223370  | -3.021103356 |
| H280 | -6.612585453  | 5.309773856  | 5.762949436  |
| H281 | -7.389068086  | 6.796570484  | 2.899087379  |
| H282 | -9.408214358  | 8.568432477  | 4.074170351  |
| H283 | -5.771733820  | 6.871071444  | 5.851766663  |
| H284 | -9.497974522  | 5.331914122  | 3.249228025  |
| H285 | 7.689114336   | 5.751455612  | -4.717532595 |
| H286 | 8.427786772   | 4.164835505  | -4.426784249 |
| H287 | 10.117265508  | 3.048246819  | -0.416251764 |
| H288 | 9.751601957   | 5.331609682  | -6.020139342 |
| H289 | 8.943283352   | 4.194561285  | -6.878381746 |
| H290 | 0.582106351   | 6.013420537  | 4.722074419  |
| H291 | -1.608911795  | 7.071399135  | 6.606536742  |
| H292 | -1.066656318  | 9.599688172  | 3.162330317  |
| H293 | -1.157532894  | 5.600477803  | 4.620685860  |
| H294 | -0.923194326  | 8.549977066  | 6.737040805  |
| H295 | 3.547317697   | 8.383811571  | -0.684650319 |
| H296 | 0.068336799   | 8.408108976  | 4.605079780  |
| H297 | 6.839893997   | -5.179116772 | 4.893561379  |
| H298 | 9.365116476   | -3.733511416 | 3.923459214  |
| H299 | 3.379161447   | 6.746236465  | -2.250682998 |
| H300 | 2.138847729   | 0.085042293  | 5.213233085  |
| H301 | 1.814041267   | 6.789450267  | -5.459424252 |
| H302 | 1.916258811   | 0.534084913  | -4.566311900 |
| H303 | 0.812658363   | 6.040535338  | -4.217578690 |
| H304 | 4.653746896   | -3.723187230 | 4.536747942  |
| H305 | 3.190159979   | 5.103045444  | -3.387807501 |
| H306 | 5.281429149   | -3.160352034 | 2.985021726  |
| H307 | 7.184223673   | -4.643604352 | 3.235461573  |
| H308 | 7.303187276   | -2.226916195 | 4.126204902  |
| H309 | 6.713445936   | -2.831982573 | 5.686645909  |
| H310 | -1.179643603  | 1.478730391  | -8.001010912 |
| H311 | 8.934054909   | -6.621301277 | 4.617061358  |
| H312 | 10.448598174  | -7.779417617 | 2.193901156  |
| H313 | 1.514464055   | 2.262046468  | -2.811981708 |
| H314 | 10.509768716  | -8.580158416 | 4.996210800  |
| H315 | 9.793969617   | -9.308936694 | 3.715837326  |
| H316 | 5.053423560   | -0.866973999 | 3.718301368  |
| H317 | -0.156242949  | 4.035433364  | -3.192265350 |
| H318 | 0.631855281   | 0.594732329  | -6.691139250 |
| H319 | 12.306525059  | -2.384889985 | 0.617026147  |
| H320 | 10.762920916  | 0.120279028  | -1.053170678 |
| H321 | 10.033001793  | -2.608563866 | 1.462947731  |
| H322 | 12.576294200  | -2.468343121 | -0.899948663 |
| H323 | 4.167594425   | 9.776587575  | -3.038412707 |
| H324 | 7.879247759   | -0.390265321 | 2.104243324  |
| H325 | 6.448391018   | -4.373943277 | -0.014913848 |
| H326 | 5.703922035   | 4.834853882  | -4.019208116 |
| H327 | 8.421324292   | -4.200009133 | -1.576751005 |
| H328 | 8.754380181   | 1.241068469  | -5.361672159 |
| H329 | 6.639175534   | 0.695906931  | -4.065137552 |
| H330 | 11.818003101  | -7.639518921 | 3.301805996  |
| H331 | 3.333612626   | 0.474845165  | 4.012056163  |
| H332 | 9.495261243   | -0.691274085 | 3.898400937  |
| H333 | 7.436989358   | 0.708611905  | 3.108774028  |
| H334 | 9.997352969   | -2.365455712 | 5.522231026  |
| H335 | 3.427209973   | -3.055762707 | 6.060847795  |
| H336 | 10.886926792  | -4.226223767 | -4.555438474 |
| H337 | 8.918792022   | -1.619408985 | -3.147961160 |

|       |               |              |              |
|-------|---------------|--------------|--------------|
| H338  | 9.647934337   | -1.924214586 | -1.558657278 |
| H339  | 7.558707132   | -3.636096880 | -3.033556972 |
| H340  | 4.070341178   | 3.051688518  | -4.184694550 |
| H341  | -1.448749422  | 4.124645925  | -5.344898014 |
| H342  | -2.211868732  | 2.806483802  | -7.418828918 |
| H343  | 5.193678924   | -3.097909492 | -0.133069930 |
| H344  | 10.619564368  | -1.633258945 | 3.394483902  |
| H345  | 11.017686639  | -3.526079907 | 2.247632011  |
| H346  | 1.959377475   | -2.147886829 | 6.009983167  |
| H347  | 10.787117474  | 1.516247752  | -3.814866435 |
| H348  | 9.354370699   | 0.659143836  | -0.137956712 |
| H349  | 4.400579137   | 2.972363771  | -5.939708402 |
| H350  | 1.927662909   | 8.957617399  | -1.132649948 |
| H351  | 3.881150244   | 0.346490367  | 7.462262943  |
| H352  | 4.170466839   | 1.844677648  | 6.549445540  |
| H353  | 12.280704382  | 3.471424195  | -1.196112089 |
| H354  | 12.605064063  | 1.895632484  | -1.487602900 |
| H355  | 13.367627418  | -0.175201025 | 2.424412509  |
| H356  | 12.175538674  | 0.129223255  | 0.499422928  |
| H357  | 14.024297000  | 2.466710778  | 2.017710516  |
| H358  | 11.968692274  | 0.537034125  | 3.257461656  |
| H359  | 6.312461361   | 2.477097417  | 8.162468916  |
| H360  | -12.060919271 | 5.171182034  | 4.988601877  |
| H361  | 10.148984918  | -3.586338239 | 8.269512882  |
| H362  | 8.369472685   | -1.501138890 | 7.889944811  |
| H363  | -12.123941932 | 5.249130037  | 1.972747544  |
| H364  | -10.482525973 | 3.039102228  | 3.354968421  |
| H365  | -11.957280222 | 2.788541109  | 2.405601499  |
| H366  | -8.514807435  | 3.341865273  | -3.051314078 |
| H367  | -0.756674146  | -0.050814100 | -1.374711013 |
| Mo368 | 6.087558395   | 0.255030571  | -0.810457853 |
| N369  | 0.419676235   | -7.157058892 | -6.826326474 |
| N370  | -3.191220564  | -7.449055998 | -5.924287815 |
| N371  | -3.675439002  | -9.349351163 | -3.883752827 |
| N372  | -1.271292020  | -9.335500698 | -2.437880604 |
| N373  | -1.272602668  | -6.673268861 | -1.376709980 |
| N374  | -3.594539081  | -6.890445593 | 0.264464426  |
| N375  | -3.010018920  | -9.088446057 | 2.045821413  |
| N376  | -0.334819324  | -8.760355118 | 3.060159802  |
| N377  | 0.160004030   | -6.067407387 | 3.646760789  |
| N378  | -2.185851326  | -4.481842397 | 4.587064792  |
| N379  | -3.523650699  | -6.534379258 | 6.148219763  |
| N380  | 9.969233208   | -8.400813915 | 4.147728880  |
| N381  | 9.352295076   | -5.787567434 | 4.189653971  |
| N382  | 4.668241239   | -1.639172131 | 4.271566101  |
| N383  | 2.879684386   | -2.325292958 | 5.618543197  |
| N384  | 2.822864845   | -0.262656047 | 4.543777554  |
| N385  | 9.809260506   | -3.036224671 | 6.298333801  |
| N386  | -1.012574294  | -2.480925210 | -6.615257924 |
| N387  | 3.450124901   | -2.376187373 | -4.969211821 |
| N388  | -3.155739867  | -1.423162960 | -5.521466204 |
| N389  | -5.665532973  | -2.591072730 | -5.718456938 |
| N390  | -5.945471695  | -3.985982743 | -3.343645411 |
| N391  | -5.924460386  | -2.201606044 | -1.187726221 |
| N392  | -3.562567822  | 1.266049539  | -2.004822112 |
| N393  | -1.781267580  | 0.133392074  | -1.530124968 |
| N394  | -8.332815065  | -1.152116611 | -0.293646342 |
| N395  | -12.218671442 | 0.438184967  | -2.286594616 |
| N396  | -13.893194199 | 0.573125365  | -0.837605734 |
| N397  | 4.014125511   | 3.527266411  | 8.674435478  |
| N398  | -0.779256122  | 7.614327978  | 6.345446491  |
| N399  | -1.981099599  | 9.232254979  | 3.411157972  |
| N400  | -2.993980351  | 7.896480659  | 1.174962586  |
| N401  | -4.830185067  | 5.884245952  | -3.013510810 |
| N402  | -5.567687351  | 8.107540791  | -3.002089540 |
| N403  | -7.058552360  | 6.377175309  | -2.605070719 |
| N404  | -3.698125237  | 5.253217881  | 1.995659835  |
| N405  | -5.529590730  | 5.854134411  | 4.050731244  |
| N406  | -8.059665855  | 7.067347732  | 3.620974854  |
| N407  | -7.275218938  | 7.525115598  | 0.637131739  |
| N408  | -10.418175909 | 5.733398002  | 3.084487223  |
| N409  | 8.823510828   | 5.068931450  | -6.358991044 |
| N410  | 5.608895003   | 4.292650591  | -4.884402386 |

|      |               |               |               |
|------|---------------|---------------|---------------|
| N411 | 2.818500326   | 5.388221902   | -4.311748560  |
| N412 | 2.855281659   | 7.600678716   | -2.477599164  |
| N413 | 3.731255650   | 3.697274296   | -9.229937713  |
| N414 | 0.981453307   | 3.315017881   | -8.542175843  |
| N415 | 11.850162661  | 2.589099011   | -1.488613984  |
| N416 | 7.905173713   | 0.814750101   | -2.324290120  |
| N417 | 8.718203941   | 1.164000650   | -4.348528414  |
| N418 | 12.123868650  | 0.902518734   | 1.162745961   |
| N419 | -1.663034231  | 2.274880837   | 0.634650251   |
| N420 | -0.537499811  | 2.275500319   | 0.532513057   |
| O421 | -1.384786513  | -7.085187841  | -4.584800557  |
| O422 | -4.353173290  | -7.650144671  | -2.523246345  |
| O423 | -2.368693678  | -10.260650118 | -0.657104238  |
| O424 | -0.141268240  | -7.535642124  | 0.397865519   |
| O425 | -2.617319746  | -5.381887860  | 1.655667979   |
| O426 | -4.190692409  | -7.921456352  | 3.613432603   |
| O427 | -0.967281575  | -9.976980123  | 4.901992459   |
| O428 | 2.183047247   | -6.591013713  | 4.605434194   |
| O429 | -0.593835589  | -3.781655221  | 6.070569335   |
| O430 | -3.588085244  | -4.942339439  | 7.766452490   |
| O431 | -2.932321002  | -8.100160906  | 9.322377148   |
| O432 | 11.122086430  | -5.200620249  | 2.817477748   |
| O433 | 8.913810227   | -5.063790570  | 6.905033422   |
| O434 | 9.823886698   | -0.880805666  | 9.178067764   |
| O435 | -3.200317130  | -2.864522169  | -3.738601001  |
| O436 | 1.775161342   | -1.968981747  | -6.449758502  |
| O437 | -6.617938591  | -0.889295107  | -4.529577074  |
| O438 | -5.493710699  | 1.485092958   | -5.314502111  |
| O439 | -8.065536373  | -4.655808009  | -3.927276277  |
| O440 | -5.882367283  | -3.926388545  | 0.314030571   |
| O441 | -7.337922973  | -0.362082893  | 1.604888930   |
| O442 | -10.873957985 | -0.903663859  | 2.166525180   |
| O443 | 6.173603286   | 0.813341078   | 9.340092217   |
| O444 | -1.972496960  | 2.192434671   | 6.698022193   |
| O445 | -3.154539099  | 7.686920897   | 4.602208652   |
| O446 | -4.936088469  | 9.118809287   | 1.283544261   |
| O447 | -5.200161245  | 5.256074137   | 0.266276596   |
| O448 | -6.459714857  | 3.774235725   | 3.822066640   |
| O449 | -3.044926891  | 4.023289204   | 4.699771544   |
| O450 | -8.351107607  | 7.354191970   | 5.875517021   |
| O451 | -11.602108668 | 7.678131828   | 2.903930190   |
| O452 | -9.479655061  | 7.363469281   | 0.052359266   |
| O453 | -13.649446052 | 4.421436076   | 3.948388637   |
| O454 | -7.928858609  | 3.475841760   | -2.281177631  |
| O455 | 6.728181313   | 3.279706943   | -6.615927102  |
| O456 | 2.759282642   | 4.817465256   | -6.533511773  |
| O457 | 1.291668983   | 8.665956757   | -3.739869727  |
| O458 | 3.433706052   | 11.059438384  | -1.630389533  |
| O459 | 0.921757843   | 1.817938561   | -10.263877606 |
| O460 | 5.202227530   | -1.138333431  | -7.197864275  |
| O461 | 6.110743476   | 0.720305406   | -6.368786064  |
| O462 | -1.856705366  | 5.298180759   | -7.742660073  |
| O463 | 11.359043096  | 2.952701117   | 1.750698440   |
| O464 | 13.902849797  | 2.134768016   | 4.027483103   |
| O465 | 4.306741371   | -3.958070412  | -2.457964061  |
| O466 | 5.763119253   | -5.612239653  | -2.158051926  |
| O467 | 11.563886937  | -3.131635404  | -2.666294020  |
| O468 | 10.068961345  | -3.799492071  | -4.220669845  |
| O469 | 7.633162564   | -0.863063475  | 0.352425143   |
| O470 | 8.473805511   | -2.917141298  | 0.732464777   |
| O471 | 6.372719418   | -1.556788242  | -1.839224853  |
| O472 | 10.311406010  | -1.156873762  | 4.209904058   |
| O473 | 7.930602109   | -0.133089596  | 3.059549137   |
| O474 | -5.457467531  | 3.088870733   | -3.093199557  |
| O475 | 12.999157646  | -2.186844064  | -0.062868944  |
| O476 | 10.933281255  | -2.602689748  | 1.892039603   |
| S477 | -0.300909534  | 6.289970715   | 2.453115820   |
| S478 | 1.057758555   | 4.444776095   | -0.478120656  |
| S479 | 4.524561606   | 1.067324507   | -2.426372581  |
| S480 | 1.231185666   | 2.692688775   | 2.765188645   |
| S481 | 1.304776107   | 0.261603272   | -0.553736483  |
| S482 | 4.757077502   | 4.855142877   | -1.627455366  |
| S483 | 4.537707750   | -0.631719795  | 0.799697857   |

|                  |                |               |               |              |
|------------------|----------------|---------------|---------------|--------------|
|                  | S484           | 3.489216872   | 5.407044781   | 2.090071315  |
|                  | S485           | 6.781802284   | 2.268013086   | 0.264702283  |
|                  | S486           | 4.886906439   | 1.979545854   | 3.435358067  |
| A, 35(3/2)<br>TS | bm22n2xd35te 1 | 53004.859     |               |              |
|                  | C1             | -1.856739324  | -7.346446467  | -5.720896742 |
|                  | C2             | -0.969902359  | -7.599989579  | -6.944613671 |
|                  | C3             | -4.154927260  | -7.164138849  | -4.873459683 |
|                  | C4             | -4.064565328  | -8.079377898  | -3.654032469 |
|                  | C5             | -3.503189600  | -10.289829661 | -2.775175626 |
|                  | C6             | -2.327221041  | -9.948206164  | -1.853333561 |
|                  | C7             | -0.155021864  | -8.839576026  | -1.637867199 |
|                  | C8             | -0.519018997  | -7.624387245  | -0.780237696 |
|                  | C9             | -1.752350857  | -5.529322619  | -0.606809220 |
|                  | C10            | -2.698792627  | -5.918476227  | 0.539894277  |
|                  | C11            | -4.536294708  | -7.306815241  | 1.304529714  |
|                  | C12            | -3.887690958  | -8.117826787  | 2.433170139  |
|                  | C13            | -2.456229974  | -10.013918569 | 3.018270073  |
|                  | C14            | -1.183244450  | -9.573999226  | 3.752309130  |
|                  | C15            | 0.972209945   | -8.402006093  | 3.594153298  |
|                  | C16            | 1.160755638   | -6.937990060  | 4.004657480  |
|                  | C17            | 0.191379082   | -4.654198649  | 3.953014545  |
|                  | C18            | -0.894303915  | -4.292701652  | 4.983274436  |
|                  | C19            | 0.135008984   | -3.789373443  | 2.666263553  |
|                  | C20            | -0.048473046  | -2.300003997  | 2.982596683  |
|                  | C21            | 1.384125513   | -4.019039483  | 1.808064887  |
|                  | C22            | -3.301279045  | -4.175723981  | 5.491083403  |
|                  | C23            | -3.483527382  | -5.248295097  | 6.579981816  |
|                  | C24            | -4.596835481  | -3.924371784  | 4.682539669  |
|                  | C25            | -5.799376751  | -3.716140379  | 5.611403246  |
|                  | C26            | -4.428669512  | -2.720587121  | 3.746270388  |
|                  | C27            | -3.769813394  | -7.591360421  | 7.127537681  |
|                  | C28            | -2.742529262  | -7.603024938  | 8.241767650  |
|                  | C29            | 10.728744090  | -7.545229916  | 3.237494031  |
|                  | C30            | 10.424581800  | -6.054955228  | 3.409171313  |
|                  | C31            | 8.858394184   | -4.472740708  | 4.548607441  |
|                  | C32            | 9.199142963   | -4.225153660  | 6.031577877  |
|                  | C33            | 7.343110117   | -4.389938714  | 4.291339745  |
|                  | C34            | 6.730570566   | -3.022406048  | 4.608182877  |
|                  | C35            | 5.291306416   | -2.944458065  | 4.095746457  |
|                  | C36            | 3.486990406   | -1.376221216  | 4.843421557  |
|                  | C37            | 10.248248743  | -2.698420429  | 7.634007374  |
|                  | C38            | 9.405745607   | -1.622646373  | 8.286144166  |
|                  | C39            | -1.271944268  | -2.939096850  | -5.249458272 |
|                  | C40            | -2.637761881  | -2.427621336  | -4.764136450 |
|                  | C41            | -0.206717445  | -2.421616221  | -4.256467083 |
|                  | C42            | 1.188115588   | -3.071730801  | -4.356297158 |
|                  | C43            | 2.151076141   | -2.413359268  | -5.342319895 |
|                  | C44            | -4.294045287  | -0.649899266  | -5.076808432 |
|                  | C45            | -5.632198081  | -1.391848254  | -5.110361675 |
|                  | C46            | -4.417378534  | 0.691431558   | -5.829393916 |
|                  | C47            | -6.827982896  | -3.465300798  | -5.591574232 |
|                  | C48            | -7.008609504  | -4.089884582  | -4.201568471 |
|                  | C49            | -6.004031849  | -4.540160676  | -2.001646624 |
|                  | C50            | -5.928537631  | -3.535290771  | -0.853661000 |
|                  | C51            | -5.888030118  | -1.176805856  | -0.156029899 |
|                  | C52            | -7.264151905  | -0.898997020  | 0.496708216  |
|                  | C53            | -5.405303342  | 0.173410228   | -0.704907074 |
|                  | C54            | -3.987106229  | 0.256496210   | -1.172643827 |
|                  | C55            | -2.839895262  | -0.445555289  | -0.890353519 |
|                  | C56            | -2.279946392  | 1.232466885   | -2.232043459 |
|                  | C57            | -9.684165931  | -0.722536699  | 0.058211264  |
|                  | C58            | -10.149582181 | -1.429631235  | 1.326818778  |
|                  | C59            | -10.622644759 | -1.080219132  | -1.125329564 |
|                  | C60            | -11.914922497 | -0.321623044  | -1.189341273 |
|                  | C61            | -12.955182120 | -0.244309465  | -0.282332352 |
|                  | C62            | -13.407271535 | 0.970679802   | -2.078624772 |
|                  | C63            | 4.190133531   | 2.073107621   | 8.706027335  |
|                  | C64            | 5.675863369   | 1.765403523   | 8.746967617  |
|                  | C65            | 3.632838133   | 1.414045889   | 7.418867286  |
|                  | C66            | 2.142941720   | 1.605182650   | 7.251273988  |
|                  | C67            | 1.220234958   | 0.709828027   | 7.821818756  |
|                  | C68            | 1.636807956   | 2.685971644   | 6.505970768  |

|       |               |              |              |
|-------|---------------|--------------|--------------|
| C69   | -0.158640049  | 0.876758977  | 7.650149077  |
| C70   | 0.264554548   | 2.872884693  | 6.337026661  |
| C71   | -0.632392781  | 1.964086849  | 6.904150779  |
| C72   | -0.732508786  | 7.716502829  | 4.886766072  |
| C73   | -2.064777713  | 8.198494722  | 4.300194342  |
| C74   | -0.376366521  | 6.336372192  | 4.311916340  |
| C75   | -3.172623645  | 9.765629244  | 2.768304890  |
| C76   | -3.781493817  | 8.883659688  | 1.677000759  |
| C77   | -3.469579359  | 6.947170995  | 0.181818663  |
| C78   | -4.187765638  | 5.736838847  | 0.817878761  |
| C79   | -2.292893703  | 6.535688340  | -0.723593311 |
| C80   | -2.596708482  | 5.590300935  | -1.890823417 |
| C81   | -3.390204936  | 6.172866953  | -3.077260987 |
| C82   | -5.810295135  | 6.800182428  | -2.913406998 |
| C83   | -4.359639057  | 4.148296426  | 2.667402824  |
| C84   | -5.555325099  | 4.580166548  | 3.542120637  |
| C85   | -3.413284206  | 3.307890856  | 3.532303662  |
| C86   | -6.352776740  | 6.198157947  | 5.192856082  |
| C87   | -7.675177871  | 6.915756233  | 4.931021539  |
| C88   | -9.207441625  | 7.875651757  | 3.253938054  |
| C89   | -10.521658771 | 7.083722596  | 3.079267335  |
| C90   | -8.916090168  | 8.717688385  | 1.988929814  |
| C91   | -8.598427332  | 7.832968437  | 0.789852277  |
| C92   | -11.550760581 | 4.864556844  | 2.834411402  |
| C93   | -12.513694226 | 4.837208714  | 4.018543089  |
| C94   | -11.068818447 | 3.424631788  | 2.509732026  |
| C95   | -10.240722088 | 3.364528734  | 1.246552948  |
| C96   | -10.855056474 | 3.222977688  | -0.006784920 |
| C97   | -8.842400046  | 3.490229620  | 1.289120702  |
| C98   | -10.104554060 | 3.232858085  | -1.185163822 |
| C99   | -8.076722348  | 3.525992367  | 0.120627569  |
| C100  | -8.722044269  | 3.405534697  | -1.108047146 |
| C101  | 7.956446949   | 4.805015037  | -5.198493251 |
| C102  | 6.701683054   | 4.068769574  | -5.639831207 |
| C103  | 4.317522238   | 3.634632340  | -5.093126067 |
| C104  | 3.213881855   | 4.656407771  | -5.389840792 |
| C105  | 1.823613998   | 6.436003036  | -4.432932467 |
| C106  | 1.973995978   | 7.651243447  | -3.521909935 |
| C107  | 2.892265318   | 8.686055033  | -1.522718565 |
| C108  | 3.585634240   | 9.912591106  | -2.079199383 |
| C109  | 3.101874326   | 2.362847577  | -9.378627274 |
| C110  | 1.572601958   | 2.465384193  | -9.444794283 |
| C111  | 3.509612928   | 1.290994876  | -8.340600176 |
| C112  | 4.982198322   | 0.871172409  | -8.517929359 |
| C113  | 5.449713741   | 0.055931725  | -7.332938691 |
| C114  | -0.469146875  | 3.432831569  | -8.490843590 |
| C115  | -0.842300188  | 4.890963851  | -8.296073262 |
| C116  | -1.171966303  | 2.451200896  | -7.519452334 |
| C117  | -0.498289313  | 2.370940456  | -6.171368992 |
| C118  | -0.738175822  | 3.333468996  | -5.175413383 |
| C119  | 0.459239052   | 1.373308271  | -5.921235042 |
| C120  | -0.013230426  | 3.310791764  | -3.977447212 |
| C121  | 1.181651396   | 1.351547994  | -4.723165921 |
| C122  | 0.954731940   | 2.327632957  | -3.749461856 |
| C123  | 10.843062080  | 2.218901922  | -0.511170054 |
| C124  | 11.446139529  | 2.054224740  | 0.892590285  |
| C125  | 10.091803351  | 0.956678162  | -0.965299545 |
| C126  | 9.314264367   | 1.077448412  | -2.239698186 |
| C127  | 9.818413075   | 1.303152559  | -3.505637850 |
| C128  | 7.645023718   | 0.896850829  | -3.635389151 |
| C129  | 12.721105702  | 0.718868707  | 2.472179705  |
| C130  | 13.613377293  | 1.874990277  | 2.869121791  |
| C131  | 5.315765735   | -4.394875138 | -1.825604928 |
| C132  | 5.988457733   | -3.660175342 | -0.699329686 |
| C133  | 7.057200090   | -2.607460870 | -1.196787333 |
| C134  | 8.107434082   | -3.319500384 | -2.098616843 |
| C135  | 9.293503189   | -2.414177533 | -2.469485550 |
| C136  | 10.447617015  | -3.147186842 | -3.097172195 |
| C137  | 7.812144274   | -2.121865230 | 0.078245530  |
| C138  | 3.505457437   | 2.448122840  | 0.412687697  |
| Fe139 | 4.960932913   | 2.736335897  | -0.954761275 |
| Fe140 | 1.445292480   | 2.348032225  | 0.432810117  |
| Fe141 | 3.354946314   | 3.157671965  | 2.273396057  |

|       |              |               |               |
|-------|--------------|---------------|---------------|
| Fe142 | 3.229846717  | 4.384465777   | -0.012497523  |
| Fe143 | 1.275034593  | 4.731698886   | 1.854087092   |
| Fe144 | 5.010490868  | 1.474600842   | 1.296496159   |
| Fe145 | 3.417256647  | 0.706421200   | -0.521914770  |
| H146  | 0.816155932  | -7.499153919  | -5.964532911  |
| H147  | 0.441340108  | -6.130486381  | -6.771982724  |
| H148  | -3.542475950 | -7.572757222  | -6.879678976  |
| H149  | -1.435725815 | -7.143612085  | -7.832334707  |
| H150  | -0.981851653 | -8.690143707  | -7.120845323  |
| H151  | -4.018006332 | -6.139977295  | -4.497936835  |
| H152  | -3.475977291 | -9.653244972  | -4.830524353  |
| H153  | -5.166496672 | -7.247612092  | -5.292918314  |
| H154  | -3.346049667 | -11.294196196 | -3.189839680  |
| H155  | -1.360180151 | -8.989009298  | -3.391079356  |
| H156  | -4.402732776 | -10.313047189 | -2.146386109  |
| H157  | -0.909252216 | -4.992866955  | -0.152533846  |
| H158  | -1.507811000 | -6.744035618  | -2.368829453  |
| H159  | 0.668974771  | -8.577235283  | -2.315728413  |
| H160  | -5.007140464 | -6.427755814  | 1.763795385   |
| H161  | -3.702794693 | -7.259009849  | -0.679681415  |
| H162  | 0.192311115  | -9.622384577  | -0.953758747  |
| H163  | -2.267912141 | -4.842047211  | -1.292481637  |
| H164  | -2.853829438 | -9.266491620  | 1.056670619   |
| H165  | -5.318066284 | -7.920132487  | 0.834486871   |
| H166  | 1.513126557  | -5.080822587  | 1.551768995   |
| H167  | 1.314648047  | -3.443244802  | 0.873266022   |
| H168  | 2.290314269  | -3.677780087  | 2.332138894   |
| H169  | -0.744701361 | -4.125347770  | 2.093415784   |
| H170  | -2.228774971 | -10.955137053 | 2.497126760   |
| H171  | -3.602434546 | -2.860799176  | 3.034921449   |
| H172  | -3.562356812 | -6.784922130  | 5.169953482   |
| H173  | -5.996604701 | -4.594802130  | 6.241550022   |
| H174  | -0.077200094 | -1.716872959  | 2.050223585   |
| H175  | 0.791198297  | -1.910008312  | 3.576619600   |
| H176  | 3.720095838  | 1.574963918   | 9.576298759   |
| H177  | -5.348835582 | -2.566685033  | 3.163661230   |
| H178  | -6.700170240 | -3.517031086  | 5.012635562   |
| H179  | -4.235082783 | -1.805801170  | 4.329880069   |
| H180  | -5.634184029 | -2.854216327  | 6.276374115   |
| H181  | -4.787862218 | -4.821749071  | 4.066437059   |
| H182  | -3.037792547 | -3.261462741  | 6.043056957   |
| H183  | -2.391714337 | -4.820049090  | 3.651816190   |
| H184  | -0.980815659 | -2.108782816  | 3.535743626   |
| H185  | -2.519078205 | 3.056005075   | 2.939046353   |
| H186  | -3.945257415 | 2.373874772   | 3.777023360   |
| H187  | -2.678502827 | 3.384027473   | 5.346595471   |
| H188  | -2.498692031 | 1.466135919   | 7.101274415   |
| H189  | -0.109288797 | 3.702625516   | 5.735809764   |
| H190  | 2.328755633  | 3.376290774   | 6.018731341   |
| H191  | 1.581003906  | -0.139852027  | 8.408849774   |
| H192  | -0.614418459 | -6.458900898  | 3.118001793   |
| H193  | 1.756143262  | -8.628892520  | 2.855912540   |
| H194  | 1.161266963  | -9.014206046  | 4.485484996   |
| H195  | -0.504417616 | -8.561009568  | 2.071826792   |
| H196  | -3.202879019 | -10.222967844 | 3.794770719   |
| H197  | -0.859490613 | 0.159432169   | 8.084160282   |
| H198  | 1.144816150  | -4.476567732  | 4.468453675   |
| H199  | -4.774558313 | -7.534843471  | 7.577444458   |
| H200  | -3.692922317 | -8.556036540  | 6.600850844   |
| H201  | -1.755098035 | -7.156795983  | 7.979087517   |
| H202  | 11.302960193 | -2.384938552  | 7.637450775   |
| H203  | 4.129322191  | -1.963045553  | -5.608131875  |
| H204  | 6.547413662  | -5.845617187  | -1.514135924  |
| H205  | 5.074911231  | 0.251094251   | -9.421076083  |
| H206  | 5.619514126  | 1.759422901   | -8.639339350  |
| H207  | 2.870815055  | 0.399350832   | -8.437956544  |
| H208  | -0.115084606 | 5.610450242   | -8.741186029  |
| H209  | 3.379483001  | 1.982284058   | -10.373252045 |
| H210  | -0.123613985 | -1.328825474  | -4.369938737  |
| H211  | 1.091084341  | -4.131055510  | -4.654171471  |
| H212  | 1.545285605  | 3.774428889   | -7.836006086  |
| H213  | -0.822882057 | 3.196558523   | -9.514046011  |
| H214  | 3.645575404  | 4.029463121   | -8.266317725  |

|      |               |              |              |
|------|---------------|--------------|--------------|
| H215 | 3.762403279   | -2.732103201 | -4.064074580 |
| H216 | 3.335479425   | 1.692316155  | -7.330061732 |
| H217 | 4.724939575   | 3.617460360  | -9.438033723 |
| H218 | -1.265746315  | -3.225805933 | -7.293117181 |
| H219 | -0.591944187  | -2.609194594 | -3.243386503 |
| H220 | 6.254871604   | 1.696533827  | -6.589865818 |
| H221 | 1.647479630   | -3.081302897 | -3.357539814 |
| H222 | -5.235123676  | -1.523196464 | 0.656664568  |
| H223 | -2.672256538  | -1.316247504 | -0.267626423 |
| H224 | -6.954461526  | -5.081639396 | -1.898931185 |
| H225 | -5.062382314  | -3.575954162 | -3.654350710 |
| H226 | -8.194136805  | -1.655240867 | -1.166625703 |
| H227 | -13.107840735 | -0.679578504 | 0.699985928  |
| H228 | -9.784843726  | -2.482564778 | 1.415831382  |
| H229 | -10.798556491 | -2.169462104 | -1.125291765 |
| H230 | -9.692620390  | 0.363612534  | 0.236835063  |
| H231 | -13.959988136 | 1.623897168  | -2.748190981 |
| H232 | -5.545564460  | 0.908321732  | 0.105089503  |
| H233 | -6.072901010  | 0.485274986  | -1.525219142 |
| H234 | -14.780743799 | 0.856687767  | -0.455438242 |
| H235 | -10.080218715 | -0.847086119 | -2.053700700 |
| H236 | -5.951745139  | -1.943629415 | -2.171117658 |
| H237 | -5.198018489  | -5.273667882 | -1.855166555 |
| H238 | -7.748933120  | -2.911118061 | -5.813889366 |
| H239 | -1.688863020  | 1.919730040  | -2.832778105 |
| H240 | -6.738541164  | -4.276372944 | -6.326293286 |
| H241 | 4.170477274   | 3.916266313  | 9.603049174  |
| H242 | 3.027366616   | 3.738173488  | 8.448671087  |
| H243 | -2.757143690  | 5.562829188  | 2.307936089  |
| H244 | -4.780267226  | 3.487936491  | 1.895759233  |
| H245 | -4.654630712  | 6.378141855  | 3.949018697  |
| H246 | -4.261878206  | 2.027676350  | -2.376413879 |
| H247 | -5.490607884  | 2.643934329  | -3.958607374 |
| H248 | -6.379000440  | 3.052636800  | -2.702527041 |
| H249 | -3.483003996  | 1.258044065  | -5.717179943 |
| H250 | -4.590692495  | 0.504450887  | -6.902547882 |
| H251 | -8.086076845  | 9.404082903  | 2.213763611  |
| H252 | -9.813448689  | 9.307064958  | 1.764123675  |
| H253 | -6.519841253  | 8.107133644  | 1.011363644  |
| H254 | -7.026072726  | 6.865780726  | -0.096160026 |
| H255 | -6.350895106  | 8.772713976  | -2.969464353 |
| H256 | -3.027625586  | 5.732392729  | -4.017998028 |
| H257 | -10.595395200 | 3.095906675  | -2.151559940 |
| H258 | -8.320427016  | 3.552878135  | 2.248379429  |
| H259 | -7.277886551  | 5.405291120  | -2.487276636 |
| H260 | -1.519809244  | 6.057648767  | -0.101963156 |
| H261 | -2.078169385  | 7.720985422  | 1.607924995  |
| H262 | -3.092804242  | 4.674162640  | -1.533599716 |
| H263 | -4.825560819  | -2.927170597 | -6.170391525 |
| H264 | -2.923703159  | 10.736242300 | 2.317800573  |
| H265 | -2.562940619  | -1.188752794 | -6.335081965 |
| H266 | -1.845385742  | 7.463454574  | -1.117518327 |
| H267 | -6.997783649  | 3.685758499  | 0.171001220  |
| H268 | -6.197902725  | 0.852622884  | -5.035420281 |
| H269 | -3.966932147  | 9.931565259  | 3.509705346  |
| H270 | -4.757691605  | 8.450660788  | -3.537618108 |
| H271 | -7.847968580  | 7.013791470  | -2.801641260 |
| H272 | -0.007999562  | -2.282136965 | -6.731939267 |
| H273 | -1.319865669  | -4.039957537 | -5.147936893 |
| H274 | -11.938238562 | 3.093899435  | -0.069363239 |
| H275 | -4.149065661  | -0.420909977 | -4.008666180 |
| H276 | -4.244228998  | 7.454700793  | -0.409264492 |
| H277 | -3.213078637  | 7.253019372  | -3.150666340 |
| H278 | -1.619428377  | 5.270644167  | -2.279078656 |
| H279 | -5.098884231  | 4.901717252  | -3.012367765 |
| H280 | -6.601329788  | 5.287591483  | 5.758239334  |
| H281 | -7.380024363  | 6.801769658  | 2.903953857  |
| H282 | -9.397927066  | 8.566189930  | 4.088801561  |
| H283 | -5.767724395  | 6.852376840  | 5.852438475  |
| H284 | -9.495179567  | 5.328389071  | 3.254728786  |
| H285 | 7.679210031   | 5.752086041  | -4.711983513 |
| H286 | 8.418519898   | 4.166176999  | -4.417115797 |
| H287 | 10.125087752  | 3.047099515  | -0.422094487 |



|      |               |              |              |
|------|---------------|--------------|--------------|
| H288 | 9.752632110   | 5.336746880  | -5.996977686 |
| H289 | 8.954066408   | 4.200533090  | -6.865112084 |
| H290 | 0.601605638   | 6.042348689  | 4.714027934  |
| H291 | -1.605136222  | 7.080358902  | 6.616922004  |
| H292 | -1.077610570  | 9.605971030  | 3.170848660  |
| H293 | -1.135416517  | 5.608762192  | 4.634153042  |
| H294 | -0.918811547  | 8.559245595  | 6.747887138  |
| H295 | 3.472593523   | 8.344353728  | -0.650357355 |
| H296 | 0.063150572   | 8.427507529  | 4.615078690  |
| H297 | 6.843035670   | -5.177187299 | 4.880321481  |
| H298 | 9.374808565   | -3.739105538 | 3.917487293  |
| H299 | 3.355065533   | 6.734679058  | -2.246357554 |
| H300 | 2.163546629   | 0.124230424  | 5.219712971  |
| H301 | 1.822181349   | 6.795667396  | -5.469300541 |
| H302 | 1.932792712   | 0.577987985  | -4.547567904 |
| H303 | 0.815137073   | 6.029867986  | -4.242678918 |
| H304 | 4.663769977   | -3.706561491 | 4.576208391  |
| H305 | 3.202008721   | 5.108581107  | -3.400963286 |
| H306 | 5.272348443   | -3.152439220 | 3.012568661  |
| H307 | 7.188095228   | -4.628329523 | 3.226279602  |
| H308 | 7.313222174   | -2.222062009 | 4.127212963  |
| H309 | 6.742488851   | -2.831048972 | 5.693419201  |
| H310 | -1.171998454  | 1.460438439  | -7.996076551 |
| H311 | 8.925174921   | -6.626464806 | 4.599673104  |
| H312 | 10.478762254  | -7.785223539 | 2.192211815  |
| H313 | 1.510772770   | 2.311982986  | -2.810198425 |
| H314 | 10.481668093  | -8.609137039 | 4.985106181  |
| H315 | 9.770740861   | -9.310718729 | 3.686373568  |
| H316 | 5.077590931   | -0.859380342 | 3.736639436  |
| H317 | -0.182250250  | 4.064186311  | -3.205010083 |
| H318 | 0.648914281   | 0.604850574  | -6.674202448 |
| H319 | 12.309187243  | -2.387722577 | 0.616851666  |
| H320 | 10.823961111  | 0.139076769  | -1.092468211 |
| H321 | 10.040475686  | -2.610232788 | 1.474080862  |
| H322 | 12.581840132  | -2.485725473 | -0.899879821 |
| H323 | 4.213280643   | 9.729397816  | -2.985349683 |
| H324 | 7.896050504   | -0.387920207 | 2.101533058  |
| H325 | 6.469031607   | -4.358113965 | 0.001840113  |
| H326 | 5.695494839   | 4.828481836  | -4.023602060 |
| H327 | 8.484154678   | -4.196335773 | -1.548856727 |
| H328 | 8.781686183   | 1.268548329  | -5.380718263 |
| H329 | 6.668827921   | 0.730529427  | -4.073574439 |
| H330 | 11.823347023  | -7.651718251 | 3.330166439  |
| H331 | 3.372490690   | 0.507959191  | 4.028922927  |
| H332 | 9.496978724   | -0.690343295 | 3.902295497  |
| H333 | 7.454885318   | 0.714403218  | 3.104026631  |
| H334 | 9.999280812   | -2.370649794 | 5.519275199  |
| H335 | 3.405869749   | -3.037235699 | 6.064852207  |
| H336 | 10.916377622  | -4.243679824 | -4.566623905 |
| H337 | 8.950490572   | -1.638004347 | -3.169228624 |
| H338 | 9.694563784   | -1.913956119 | -1.581393701 |
| H339 | 7.613093336   | -3.669644592 | -3.016381365 |
| H340 | 4.069361747   | 3.037549237  | -4.201492389 |
| H341 | -1.478602942  | 4.117443732  | -5.357683466 |
| H342 | -2.216938858  | 2.784252569  | -7.425018548 |
| H343 | 5.223184889   | -3.079455909 | -0.166495403 |
| H344 | 10.625051331  | -1.629915717 | 3.402176158  |
| H345 | 11.032776989  | -3.520809067 | 2.257696712  |
| H346 | 1.958116501   | -2.099589620 | 6.014719692  |
| H347 | 10.823806950  | 1.525815035  | -3.843624912 |
| H348 | 9.407094538   | 0.639411364  | -0.169031744 |
| H349 | 4.402889478   | 2.970889970  | -5.956189317 |
| H350 | 1.890429542   | 8.970576002  | -1.167734645 |
| H351 | 3.872214203   | 0.340881974  | 7.470765933  |
| H352 | 4.161297005   | 1.834439789  | 6.548366705  |
| H353 | 12.281996464  | 3.517039372  | -1.183342124 |
| H354 | 12.641424223  | 1.950260188  | -1.481868532 |
| H355 | 13.356685278  | -0.179314351 | 2.428879732  |
| H356 | 12.183791941  | 0.134448752  | 0.493877394  |
| H357 | 14.060373111  | 2.442121230  | 2.017308878  |
| H358 | 11.961508823  | 0.550759421  | 3.251922579  |
| H359 | 6.305421641   | 2.477952045  | 8.160970896  |
| H360 | -12.082087593 | 5.183335098  | 4.987453483  |

|       |               |               |              |
|-------|---------------|---------------|--------------|
| H361  | 10.159127093  | -3.602571082  | 8.260908872  |
| H362  | 8.360232812   | -1.535212955  | 7.902789188  |
| H363  | -12.112036022 | 5.257826336   | 1.971431162  |
| H364  | -10.489535982 | 3.040948143   | 3.364757913  |
| H365  | -11.964965538 | 2.794693992   | 2.414859056  |
| H366  | -8.527708323  | 3.353950209   | -3.045209318 |
| H367  | -0.771210747  | 0.013290211   | -1.409894338 |
| Mo368 | 6.122402003   | 0.242683719   | -0.814189861 |
| N369  | 0.408472446   | -7.150904287  | -6.836305198 |
| N370  | -3.198205504  | -7.465529758  | -5.928810681 |
| N371  | -3.675828072  | -9.358215434  | -3.877944705 |
| N372  | -1.267331490  | -9.333912740  | -2.436147066 |
| N373  | -1.281868811  | -6.672042651  | -1.376232788 |
| N374  | -3.602675514  | -6.890724812  | 0.269370767  |
| N375  | -3.010389275  | -9.080880599  | 2.050726275  |
| N376  | -0.327662130  | -8.770236320  | 3.058883769  |
| N377  | 0.166371338   | -6.082842200  | 3.652655660  |
| N378  | -2.185933482  | -4.497840102  | 4.600007063  |
| N379  | -3.530598355  | -6.538925911  | 6.161568727  |
| N380  | 9.954149716   | -8.411510585  | 4.132848002  |
| N381  | 9.350624089   | -5.793640381  | 4.177483785  |
| N382  | 4.688817933   | -1.621871972  | 4.300762980  |
| N383  | 2.876058555   | -2.292676485  | 5.625156230  |
| N384  | 2.856249084   | -0.226096610  | 4.560503530  |
| N385  | 9.813401587   | -3.044679472  | 6.293351244  |
| N386  | -1.016721302  | -2.494534178  | -6.623806379 |
| N387  | 3.443328689   | -2.368539638  | -4.963962589 |
| N388  | -3.161718135  | -1.432081321  | -5.529088349 |
| N389  | -5.674223250  | -2.591544762  | -5.719865277 |
| N390  | -5.952828204  | -3.985248579  | -3.343052816 |
| N391  | -5.928766149  | -2.205655159  | -1.186771789 |
| N392  | -3.603753209  | 1.291641838   | -2.015462823 |
| N393  | -1.803870985  | 0.174758179   | -1.565209909 |
| N394  | -8.338826076  | -1.164673745  | -0.288072662 |
| N395  | -12.212089292 | 0.442272509   | -2.308042510 |
| N396  | -13.890690781 | 0.583576178   | -0.863944552 |
| N397  | 4.004128563   | 3.526406465   | 8.671650766  |
| N398  | -0.776732409  | 7.624512658   | 6.353751136  |
| N399  | -1.990986892  | 9.236100211   | 3.419955810  |
| N400  | -2.996330176  | 7.905591787   | 1.174893824  |
| N401  | -4.831185950  | 5.901906012   | -3.010913781 |
| N402  | -5.571788438  | 8.123961901   | -3.027473531 |
| N403  | -7.062798034  | 6.395557000   | -2.619598364 |
| N404  | -3.689687491  | 5.256283917   | 1.990009877  |
| N405  | -5.526420474  | 5.847603858   | 4.045572740  |
| N406  | -8.053163011  | 7.063219894   | 3.627136141  |
| N407  | -7.280449352  | 7.528003769   | 0.635380880  |
| N408  | -10.415959731 | 5.732442807   | 3.100799859  |
| N409  | 8.828351611   | 5.073121235   | -6.344776235 |
| N410  | 5.604027994   | 4.287805357   | -4.889943256 |
| N411  | 2.823957850   | 5.388667987   | -4.324296498 |
| N412  | 2.831537961   | 7.588727489   | -2.473423887 |
| N413  | 3.726332621   | 3.682875462   | -9.230034036 |
| N414  | 0.977831888   | 3.299190642   | -8.545273797 |
| N415  | 11.873015750  | 2.628588360   | -1.487258237 |
| N416  | 7.945464518   | 0.830468381   | -2.341403390 |
| N417  | 8.750257574   | 1.186150041   | -4.368235361 |
| N418  | 12.133044632  | 0.907519090   | 1.157396714  |
| N419  | -1.839364875  | 2.325755592   | 0.665926582  |
| N420  | -0.731891302  | 2.303712134   | 0.514965909  |
| O421  | -1.390127206  | -7.104545591  | -4.592490015 |
| O422  | -4.350005689  | -7.653365737  | -2.522272981 |
| O423  | -2.361218565  | -10.253001751 | -0.650257717 |
| O424  | -0.149019312  | -7.528106633  | 0.400352265  |
| O425  | -2.635626530  | -5.364687474  | 1.649160200  |
| O426  | -4.195769381  | -7.921095750  | 3.621030561  |
| O427  | -0.963174163  | -9.989757831  | 4.898049634  |
| O428  | 2.195338328   | -6.604297839  | 4.600891628  |
| O429  | -0.590322636  | -3.829381694  | 6.093696562  |
| O430  | -3.588613175  | -4.947473502  | 7.780616063  |
| O431  | -2.946490148  | -8.111648522  | 9.333399844  |
| O432  | 11.140692109  | -5.208394168  | 2.832253158  |
| O433  | 8.922804527   | -5.075989369  | 6.895261608  |

|                           |                    |               |               |               |
|---------------------------|--------------------|---------------|---------------|---------------|
|                           | O434               | 9.816860762   | -0.900750353  | 9.180726751   |
|                           | O435               | -3.208109136  | -2.878083517  | -3.749483316  |
|                           | O436               | 1.768003185   | -1.957288661  | -6.443491318  |
|                           | O437               | -6.623981870  | -0.880928497  | -4.542609647  |
|                           | O438               | -5.482991788  | 1.489237734   | -5.289277228  |
|                           | O439               | -8.073844783  | -4.655007527  | -3.925152438  |
|                           | O440               | -5.888988706  | -3.931217084  | 0.314098929   |
|                           | O441               | -7.342833701  | -0.374719861  | 1.610937390   |
|                           | O442               | -10.889433699 | -0.936330131  | 2.159972981   |
|                           | O443               | 6.167737915   | 0.817146507   | 9.341582440   |
|                           | O444               | -1.979423304  | 2.179468268   | 6.686150327   |
|                           | O445               | -3.153773069  | 7.678504669   | 4.606759441   |
|                           | O446               | -4.941517134  | 9.122968366   | 1.284177098   |
|                           | O447               | -5.192184432  | 5.257898411   | 0.261119127   |
|                           | O448               | -6.460489810  | 3.771913494   | 3.793768371   |
|                           | O449               | -3.066920981  | 4.027518650   | 4.717422380   |
|                           | O450               | -8.356682490  | 7.314911918   | 5.883638271   |
|                           | O451               | -11.597823844 | 7.678164237   | 2.928753621   |
|                           | O452               | -9.489638257  | 7.348662770   | 0.074948996   |
|                           | O453               | -13.665292871 | 4.444498213   | 3.930903962   |
|                           | O454               | -7.941347044  | 3.493901572   | -2.276463740  |
|                           | O455               | 6.731900662   | 3.285235667   | -6.622606212  |
|                           | O456               | 2.745773306   | 4.801253265   | -6.540126878  |
|                           | O457               | 1.273567135   | 8.653638327   | -3.744017439  |
|                           | O458               | 3.504696401   | 11.018624926  | -1.569745684  |
|                           | O459               | 0.917824407   | 1.799514370   | -10.264225576 |
|                           | O460               | 5.209155431   | -1.139819970  | -7.193739271  |
|                           | O461               | 6.124897182   | 0.720048465   | -6.375010566  |
|                           | O462               | -1.862884486  | 5.280223128   | -7.746930109  |
|                           | O463               | 11.381520463  | 2.963313706   | 1.741356015   |
|                           | O464               | 13.905112135  | 2.133945453   | 4.027646433   |
|                           | O465               | 4.378837549   | -3.978571085  | -2.492276063  |
|                           | O466               | 5.818756122   | -5.635146252  | -2.129576411  |
|                           | O467               | 11.598372613  | -3.170547322  | -2.665340324  |
|                           | O468               | 10.104152641  | -3.802888003  | -4.236674001  |
|                           | O469               | 7.698926933   | -0.860446897  | 0.338343313   |
|                           | O470               | 8.503075509   | -2.925203910  | 0.745261020   |
|                           | O471               | 6.433363348   | -1.558694506  | -1.845882720  |
|                           | O472               | 10.312855054  | -1.154267856  | 4.216661813   |
|                           | O473               | 7.933795817   | -0.136087836  | 3.059303380   |
|                           | O474               | -5.466577966  | 3.108048090   | -3.078670133  |
|                           | O475               | 13.001162157  | -2.193007330  | -0.064703836  |
|                           | O476               | 10.942128205  | -2.598177953  | 1.903619034   |
|                           | S477               | -0.308945499  | 6.313535071   | 2.461342756   |
|                           | S478               | 1.022948784   | 4.491048496   | -0.467676624  |
|                           | S479               | 4.549819135   | 1.065276066   | -2.426832298  |
|                           | S480               | 1.210248647   | 2.698873846   | 2.766958668   |
|                           | S481               | 1.275674145   | 0.241176282   | -0.565367033  |
|                           | S482               | 4.727901481   | 4.841412381   | -1.632652732  |
|                           | S483               | 4.605149188   | -0.679319502  | 0.797600032   |
|                           | S484               | 3.482385412   | 5.369403099   | 2.051187763   |
|                           | S485               | 6.803356276   | 2.271875599   | 0.241623549   |
|                           | S486               | 4.884013333   | 2.032718120   | 3.429390741   |
| A, 35(3/2)<br>dissociated | bm22n2xd35te.car 3 |               |               |               |
|                           | C1                 | -1.844471418  | -7.321193903  | -5.708195294  |
|                           | C2                 | -0.955900918  | -7.587545806  | -6.927991521  |
|                           | C3                 | -4.148574059  | -7.141773260  | -4.870941194  |
|                           | C4                 | -4.064272076  | -8.065128670  | -3.656910336  |
|                           | C5                 | -3.509701026  | -10.282604820 | -2.789025941  |
|                           | C6                 | -2.335257454  | -9.951066299  | -1.862341535  |
|                           | C7                 | -0.156238573  | -8.852252251  | -1.640321755  |
|                           | C8                 | -0.510043980  | -7.634196708  | -0.784196740  |
|                           | C9                 | -1.729376842  | -5.534378727  | -0.602306001  |
|                           | C10                | -2.676023442  | -5.929280092  | 0.542447673   |
|                           | C11                | -4.526377619  | -7.309771003  | 1.292755360   |
|                           | C12                | -3.881318414  | -8.123740024  | 2.422121460   |
|                           | C13                | -2.452521361  | -10.015354558 | 3.016544259   |
|                           | C14                | -1.190324860  | -9.556891381  | 3.758018025   |
|                           | C15                | 0.959665371   | -8.373817000  | 3.597738460   |
|                           | C16                | 1.146758784   | -6.909476740  | 4.004763876   |
|                           | C17                | 0.198008264   | -4.622014290  | 3.935156504   |
|                           | C18                | -0.890610459  | -4.235378200  | 4.952888135   |

|     |               |              |              |
|-----|---------------|--------------|--------------|
| C19 | 0.172651191   | -3.759261099 | 2.644140442  |
| C20 | 0.036583696   | -2.264767240 | 2.957673997  |
| C21 | 1.419051564   | -4.030156087 | 1.794114851  |
| C22 | -3.300726068  | -4.152941594 | 5.464891287  |
| C23 | -3.470573139  | -5.230757176 | 6.552525108  |
| C24 | -4.597097313  | -3.909772820 | 4.655237572  |
| C25 | -5.804468108  | -3.724112375 | 5.580720140  |
| C26 | -4.438870673  | -2.696457880 | 3.729161311  |
| C27 | -3.733289679  | -7.583554960 | 7.097303896  |
| C28 | -2.713851705  | -7.573601487 | 8.217889454  |
| C29 | 10.727439769  | -7.543251488 | 3.247372998  |
| C30 | 10.419155530  | -6.055412595 | 3.416884692  |
| C31 | 8.855069747   | -4.472772177 | 4.563072625  |
| C32 | 9.191649874   | -4.217375536 | 6.045252699  |
| C33 | 7.340355283   | -4.401225495 | 4.300036734  |
| C34 | 6.716313437   | -3.033627877 | 4.598636439  |
| C35 | 5.286589885   | -2.963852296 | 4.058797087  |
| C36 | 3.471450268   | -1.418389546 | 4.822853286  |
| C37 | 10.252430840  | -2.693816454 | 7.643223398  |
| C38 | 9.424020523   | -1.597894615 | 8.282500875  |
| C39 | -1.259667663  | -2.918193560 | -5.232636595 |
| C40 | -2.623945669  | -2.406075200 | -4.745700009 |
| C41 | -0.186356276  | -2.413338802 | -4.242930868 |
| C42 | 1.201278570   | -3.076565191 | -4.355101890 |
| C43 | 2.163996299   | -2.427961463 | -5.347616642 |
| C44 | -4.291171160  | -0.639525522 | -5.076699003 |
| C45 | -5.623607717  | -1.392758017 | -5.103640616 |
| C46 | -4.424356078  | 0.688609284  | -5.851496136 |
| C47 | -6.808350564  | -3.468914703 | -5.594474268 |
| C48 | -6.993450131  | -4.092869720 | -4.204481556 |
| C49 | -5.994138728  | -4.544133481 | -2.002901933 |
| C50 | -5.914939347  | -3.540615480 | -0.854090702 |
| C51 | -5.860934692  | -1.180953811 | -0.160552661 |
| C52 | -7.233814010  | -0.889003859 | 0.491132733  |
| C53 | -5.365438689  | 0.160468641  | -0.720575896 |
| C54 | -3.947431542  | 0.216003845  | -1.191086407 |
| C55 | -2.805143215  | -0.477525177 | -0.868792246 |
| C56 | -2.220492915  | 1.166419718  | -2.239602251 |
| C57 | -9.651051071  | -0.687572627 | 0.059816552  |
| C58 | -10.091968774 | -1.360695023 | 1.355568700  |
| C59 | -10.608547656 | -1.079211375 | -1.097931794 |
| C60 | -11.904262587 | -0.328795471 | -1.156554016 |
| C61 | -12.942962174 | -0.263877526 | -0.247636034 |
| C62 | -13.404529120 | 0.963947930  | -2.032684574 |
| C63 | 4.203222565   | 2.074713535  | 8.700486151  |
| C64 | 5.688162317   | 1.764005717  | 8.741505437  |
| C65 | 3.647354156   | 1.422124140  | 7.407322415  |
| C66 | 2.158265172   | 1.613392799  | 7.239059510  |
| C67 | 1.235786352   | 0.720651240  | 7.813605268  |
| C68 | 1.650134561   | 2.693587187  | 6.493255527  |
| C69 | -0.143777232  | 0.891360989  | 7.650171969  |
| C70 | 0.277141847   | 2.883253352  | 6.331621270  |
| C71 | -0.619165190  | 1.979410445  | 6.907228237  |
| C72 | -0.737958351  | 7.695592069  | 4.878993778  |
| C73 | -2.064407456  | 8.198180773  | 4.291549874  |
| C74 | -0.407782168  | 6.304560450  | 4.315833922  |
| C75 | -3.155252804  | 9.770487886  | 2.749531664  |
| C76 | -3.773639017  | 8.879313997  | 1.670260985  |
| C77 | -3.472456767  | 6.925404394  | 0.193396409  |
| C78 | -4.192591323  | 5.724508326  | 0.845824944  |
| C79 | -2.298375521  | 6.508066501  | -0.712158485 |
| C80 | -2.602035681  | 5.562654922  | -1.879524705 |
| C81 | -3.387158206  | 6.145645220  | -3.071590569 |
| C82 | -5.806890731  | 6.771978180  | -2.891075346 |
| C83 | -4.380225178  | 4.168534721  | 2.724717212  |
| C84 | -5.578254794  | 4.615510267  | 3.582840220  |
| C85 | -3.446479442  | 3.343578402  | 3.621257689  |
| C86 | -6.367860007  | 6.249070332  | 5.215743292  |
| C87 | -7.684515989  | 6.968619737  | 4.935989910  |
| C88 | -9.210612557  | 7.887724894  | 3.232824237  |
| C89 | -10.513608005 | 7.079514843  | 3.049224776  |
| C90 | -8.913918272  | 8.727435470  | 1.966700080  |
| C91 | -8.587572500  | 7.842857495  | 0.770416083  |

|       |               |               |              |
|-------|---------------|---------------|--------------|
| C92   | -11.522474078 | 4.848279380   | 2.820673797  |
| C93   | -12.469623045 | 4.814036199   | 4.017609130  |
| C94   | -11.035626075 | 3.410503590   | 2.492805518  |
| C95   | -10.208929524 | 3.350157910   | 1.228452033  |
| C96   | -10.823009759 | 3.210120878   | -0.025115362 |
| C97   | -8.810305817  | 3.471689065   | 1.272108238  |
| C98   | -10.071806242 | 3.215629121   | -1.202858915 |
| C99   | -8.043550952  | 3.501575320   | 0.104387225  |
| C100  | -8.688948655  | 3.380303886   | -1.124118728 |
| C101  | 7.971702534   | 4.811375746   | -5.228591938 |
| C102  | 6.710126896   | 4.074531229   | -5.648148459 |
| C103  | 4.332228766   | 3.648023623   | -5.069882296 |
| C104  | 3.230409692   | 4.668343011   | -5.371469574 |
| C105  | 1.829787730   | 6.438683979   | -4.410930700 |
| C106  | 1.995478495   | 7.661330929   | -3.512762056 |
| C107  | 2.941683854   | 8.709115343   | -1.536907012 |
| C108  | 3.529545422   | 9.967246167   | -2.143904757 |
| C109  | 3.108123224   | 2.388141728   | -9.383711392 |
| C110  | 1.578389262   | 2.496181262   | -9.448347042 |
| C111  | 3.511319493   | 1.318398344   | -8.340512242 |
| C112  | 4.977651394   | 0.882783412   | -8.521294578 |
| C113  | 5.438099796   | 0.064037057   | -7.335187379 |
| C114  | -0.459364258  | 3.460627295   | -8.485074918 |
| C115  | -0.828831629  | 4.918403844   | -8.285852068 |
| C116  | -1.167081186  | 2.474308404   | -7.522241341 |
| C117  | -0.490411888  | 2.369222400   | -6.178132538 |
| C118  | -0.710167778  | 3.325464045   | -5.172061606 |
| C119  | 0.450919304   | 1.352788780   | -5.942091497 |
| C120  | 0.013122638   | 3.274611288   | -3.974862106 |
| C121  | 1.172876836   | 1.303056330   | -4.744986399 |
| C122  | 0.963741643   | 2.270486731   | -3.758867438 |
| C123  | 10.827616360  | 2.196080268   | -0.494488992 |
| C124  | 11.434600318  | 2.031204760   | 0.907511985  |
| C125  | 10.043134322  | 0.946224994   | -0.927146791 |
| C126  | 9.276526010   | 1.058793439   | -2.208807783 |
| C127  | 9.787002581   | 1.284206832   | -3.472057195 |
| C128  | 7.619135460   | 0.853322932   | -3.617575123 |
| C129  | 12.750127403  | 0.711057348   | 2.469540080  |
| C130  | 13.611614266  | 1.892035918   | 2.862734020  |
| C131  | 5.239859157   | -4.376383495  | -1.813273093 |
| C132  | 5.942658373   | -3.674932000  | -0.684713210 |
| C133  | 7.006186172   | -2.622531419  | -1.187409503 |
| C134  | 8.043324769   | -3.323866068  | -2.111250254 |
| C135  | 9.236394440   | -2.418820458  | -2.454787691 |
| C136  | 10.397405992  | -3.129757799  | -3.091970602 |
| C137  | 7.773473199   | -2.143645393  | 0.082758632  |
| C138  | 3.541369605   | 2.472309427   | 0.406345484  |
| Fe139 | 4.980794681   | 2.753818604   | -0.963160290 |
| Fe140 | 1.578722310   | 2.355997932   | 0.405138344  |
| Fe141 | 3.256059541   | 3.117558302   | 2.284906852  |
| Fe142 | 3.202584446   | 4.392427983   | -0.012365401 |
| Fe143 | 1.166058586   | 4.646937229   | 1.798478069  |
| Fe144 | 5.019815199   | 1.492469096   | 1.320154785  |
| Fe145 | 3.420044896   | 0.704736927   | -0.516480490 |
| H146  | 0.828413040   | -7.508427956  | -5.944517289 |
| H147  | 0.474997386   | -6.136601750  | -6.755511149 |
| H148  | -3.524653812  | -7.550717367  | -6.874824023 |
| H149  | -1.414481749  | -7.128398940  | -7.817705835 |
| H150  | -0.981728610  | -8.677764551  | -7.100957174 |
| H151  | -4.014526102  | -6.119813398  | -4.487323997 |
| H152  | -3.474212826  | -9.632477204  | -4.841027469 |
| H153  | -5.157655654  | -7.225135205  | -5.297555800 |
| H154  | -3.355062754  | -11.285049816 | -3.210245133 |
| H155  | -1.363020823  | -8.988570656  | -3.394434017 |
| H156  | -4.411949503  | -10.305228390 | -2.163904221 |
| H157  | -0.883301314  | -5.005135433  | -0.145694227 |
| H158  | -1.492456269  | -6.742198886  | -2.371900922 |
| H159  | 0.671557804   | -8.601016649  | -2.317967285 |
| H160  | -5.000455533  | -6.432596930  | 1.752357654  |
| H161  | -3.690471821  | -7.249355035  | -0.689350543 |
| H162  | 0.182551058   | -9.638975940  | -0.956118207 |
| H163  | -2.242453067  | -4.840098039  | -1.282758482 |
| H164  | -2.855275769  | -9.284036535  | 1.049188523  |

|      |               |               |               |
|------|---------------|---------------|---------------|
| H165 | -5.304336761  | -7.922643981  | 0.816990057   |
| H166 | 1.509814328   | -5.093200906  | 1.528413850   |
| H167 | 1.381053500   | -3.442233316  | 0.865529082   |
| H168 | 2.332061344   | -3.730219893  | 2.330886998   |
| H169 | -0.714366698  | -4.069304148  | 2.068351568   |
| H170 | -2.206618914  | -10.954076439 | 2.500240167   |
| H171 | -3.608887169  | -2.823319966  | 3.019073081   |
| H172 | -3.537985193  | -6.767839132  | 5.141618431   |
| H173 | -5.990638178  | -4.608301606  | 6.206553474   |
| H174 | 0.041343449   | -1.680824379  | 2.024403561   |
| H175 | 0.881164364   | -1.901791599  | 3.561580905   |
| H176 | 3.730750414   | 1.574066060   | 9.567807244   |
| H177 | -5.359630907  | -2.546070886  | 3.147134667   |
| H178 | -6.706273273  | -3.535790430  | 4.980620700   |
| H179 | -4.255005020  | -1.784780323  | 4.321032799   |
| H180 | -5.653906696  | -2.862494740  | 6.249779468   |
| H181 | -4.775053123  | -4.803575332  | 4.030532020   |
| H182 | -3.045855218  | -3.239215912  | 6.020878066   |
| H183 | -2.381448707  | -4.807299453  | 3.633770906   |
| H184 | -0.894218517  | -2.035688532  | 3.500185264   |
| H185 | -2.528472676  | 3.100116096   | 3.066442794   |
| H186 | -3.975846700  | 2.403978956   | 3.851100263   |
| H187 | -2.711141794  | 3.439606973   | 5.428892250   |
| H188 | -2.485134115  | 1.487613021   | 7.118667681   |
| H189 | -0.098955110  | 3.714708933   | 5.734657761   |
| H190 | 2.340341747   | 3.384781296   | 6.003772587   |
| H191 | 1.596647430   | -0.129993704  | 8.399226542   |
| H192 | -0.618607475  | -6.420930101  | 3.096107480   |
| H193 | 1.742967259   | -8.600500123  | 2.858052266   |
| H194 | 1.151237839   | -8.983963313  | 4.490180874   |
| H195 | -0.516045131  | -8.545702045  | 2.075869051   |
| H196 | -3.201836583  | -10.231189648 | 3.788098980   |
| H197 | -0.844182093  | 0.177571287   | 8.091128485   |
| H198 | 1.149136941   | -4.454578869  | 4.457423549   |
| H199 | -4.743222735  | -7.551707885  | 7.537946196   |
| H200 | -3.624217810  | -8.543732715  | 6.568021663   |
| H201 | -1.731336526  | -7.114753235  | 7.959098268   |
| H202 | 11.312121876  | -2.395986160  | 7.649649496   |
| H203 | 4.141887536   | -1.978474322  | -5.618231955  |
| H204 | 6.481885132   | -5.835322260  | -1.586203799  |
| H205 | 5.061422679   | 0.260397941   | -9.423763582  |
| H206 | 5.624719865   | 1.763538782   | -8.644886725  |
| H207 | 2.862954997   | 0.432702777   | -8.429180188  |
| H208 | -0.100742817  | 5.636463548   | -8.730485099  |
| H209 | 3.383559841   | 2.002907283   | -10.377042396 |
| H210 | -0.094392080  | -1.320929566  | -4.351230889  |
| H211 | 1.089398981   | -4.133656303  | -4.652974742  |
| H212 | 1.556881099   | 3.793529259   | -7.830343407  |
| H213 | -0.812837657  | 3.231918772   | -9.509475656  |
| H214 | 3.668046039   | 4.051074420   | -8.274078115  |
| H215 | 3.773774222   | -2.740680992  | -4.068871866  |
| H216 | 3.344878842   | 1.729114935   | -7.332545316  |
| H217 | 4.731832742   | 3.640164493   | -9.460764907  |
| H218 | -1.268010648  | -3.199084164  | -7.276605123  |
| H219 | -0.567554626  | -2.602011738  | -3.228816784  |
| H220 | 6.240186190   | 1.701892050   | -6.584432847  |
| H221 | 1.668659403   | -3.094196085  | -3.361148260  |
| H222 | -5.210653946  | -1.529396096  | 0.654550618   |
| H223 | -2.647402776  | -1.322142727  | -0.208571755  |
| H224 | -6.947643462  | -5.080155623  | -1.900024913  |
| H225 | -5.049301603  | -3.580547611  | -3.652659659  |
| H226 | -8.173113460  | -1.624841391  | -1.176810112  |
| H227 | -13.092049813 | -0.707254272  | 0.730270105   |
| H228 | -9.707402049  | -2.403624822  | 1.475644913   |
| H229 | -10.778497641 | -2.168773092  | -1.066375317  |
| H230 | -9.659590548  | 0.402866396   | 0.211195912   |
| H231 | -13.962158474 | 1.621101639   | -2.694968902  |
| H232 | -5.491584037  | 0.906153052   | 0.082161492   |
| H233 | -6.030546564  | 0.472956722   | -1.542520897  |
| H234 | -14.775437160 | 0.827996736   | -0.408894379  |
| H235 | -10.084030386 | -0.869090748  | -2.042332666  |
| H236 | -5.931175914  | -1.949729895  | -2.172816554  |
| H237 | -5.192990290  | -5.282200383  | -1.854755266  |

|      |               |              |              |
|------|---------------|--------------|--------------|
| H238 | -7.731480976  | -2.920839461 | -5.822242389 |
| H239 | -1.613572099  | 1.847435118  | -2.829498450 |
| H240 | -6.710625646  | -4.280559482 | -6.326933996 |
| H241 | 4.180602707   | 3.916780293  | 9.599873869  |
| H242 | 3.046533728   | 3.742283727  | 8.434989062  |
| H243 | -2.763846281  | 5.564427803  | 2.337524945  |
| H244 | -4.794565371  | 3.494778700  | 1.962998804  |
| H245 | -4.665187692  | 6.409319435  | 3.974466290  |
| H246 | -4.197761497  | 1.964689193  | -2.426000401 |
| H247 | -5.468794637  | 2.618654840  | -3.978537406 |
| H248 | -6.338985901  | 3.019695951  | -2.709528603 |
| H249 | -3.494484063  | 1.263085838  | -5.745179625 |
| H250 | -4.592662712  | 0.481897012  | -6.921377517 |
| H251 | -8.087878730  | 9.417322430  | 2.195865153  |
| H252 | -9.811710421  | 9.313780750  | 1.736444899  |
| H253 | -6.509731627  | 8.098511973  | 1.017701231  |
| H254 | -7.014325014  | 6.858869786  | -0.090269711 |
| H255 | -6.345110734  | 8.742887601  | -2.912922298 |
| H256 | -3.017540342  | 5.703966115  | -4.008894184 |
| H257 | -10.562535905 | 3.080384833  | -2.169305689 |
| H258 | -8.289056285  | 3.534834540  | 2.231828326  |
| H259 | -7.268323026  | 5.372576938  | -2.463304555 |
| H260 | -1.526942890  | 6.028694473  | -0.089588774 |
| H261 | -2.076944343  | 7.707820791  | 1.609647190  |
| H262 | -3.105957879  | 4.650327754  | -1.523374988 |
| H263 | -4.809269977  | -2.918364986 | -6.172299265 |
| H264 | -2.889714887  | 10.729313520 | 2.283257791  |
| H265 | -2.551406059  | -1.175491836 | -6.322443607 |
| H266 | -1.848115864  | 7.434833460  | -1.105441119 |
| H267 | -6.964219359  | 3.658141241  | 0.155958848  |
| H268 | -6.208326921  | 0.849758383  | -5.063568491 |
| H269 | -3.948743836  | 9.959806959  | 3.486161302  |
| H270 | -4.758204771  | 8.429802969  | -3.497331898 |
| H271 | -7.842089906  | 6.988451396  | -2.752780434 |
| H272 | 0.004242678   | -2.273052334 | -6.720840187 |
| H273 | -1.311620758  | -4.018762679 | -5.135290122 |
| H274 | -11.906197677 | 3.084600614  | -0.088904440 |
| H275 | -4.150044961  | -0.393559449 | -4.011543512 |
| H276 | -4.247987907  | 7.429542873  | -0.399304254 |
| H277 | -3.211065066  | 7.225562969  | -3.145578445 |
| H278 | -1.624276158  | 5.236375132  | -2.262390451 |
| H279 | -5.097057457  | 4.873769407  | -3.030132106 |
| H280 | -6.625390634  | 5.342176627  | 5.783547306  |
| H281 | -7.377927985  | 6.812332931  | 2.913446863  |
| H282 | -9.417856924  | 8.580695717  | 4.062574977  |
| H283 | -5.782038312  | 6.902793303  | 5.875050302  |
| H284 | -9.471874329  | 5.332600499  | 3.244225932  |
| H285 | 7.703026577   | 5.762888167  | -4.746105473 |
| H286 | 8.442557046   | 4.177612419  | -4.448152087 |
| H287 | 10.127320721  | 3.039959119  | -0.410103974 |
| H288 | 9.757094707   | 5.334064372  | -6.063463068 |
| H289 | 8.940945538   | 4.188868174  | -6.905430805 |
| H290 | 0.567393352   | 6.000168846  | 4.716875835  |
| H291 | -1.615321387  | 7.072796084  | 6.606669762  |
| H292 | -1.062607309  | 9.595192712  | 3.158939322  |
| H293 | -1.176699311  | 5.594552868  | 4.652407585  |
| H294 | -0.918037128  | 8.546906771  | 6.737931113  |
| H295 | 3.593597019   | 8.399029917  | -0.704136112 |
| H296 | 0.069644083   | 8.390470404  | 4.599392180  |
| H297 | 6.842126329   | -5.184321123 | 4.895780154  |
| H298 | 9.369340298   | -3.739805444 | 3.929034120  |
| H299 | 3.408326423   | 6.756321024  | -2.259952519 |
| H300 | 2.138359761   | 0.064521607  | 5.218038753  |
| H301 | 1.818131622   | 6.787582828  | -5.451230061 |
| H302 | 1.910087029   | 0.513753660  | -4.581395783 |
| H303 | 0.822271619   | 6.038200435  | -4.204570018 |
| H304 | 4.656201900   | -3.733193802 | 4.523131067  |
| H305 | 3.198715338   | 5.104793429  | -3.378744567 |
| H306 | 5.288639340   | -3.167168079 | 2.974715840  |
| H307 | 7.189664346   | -4.652093630 | 3.237280610  |
| H308 | 7.304958888   | -2.233296970 | 4.124289761  |
| H309 | 6.709424502   | -2.836899859 | 5.683643637  |
| H310 | -1.179034232  | 1.489457975  | -8.010519429 |

|       |               |              |              |
|-------|---------------|--------------|--------------|
| H311  | 8.940119330   | -6.625532043 | 4.633594143  |
| H312  | 10.451550586  | -7.793477239 | 2.211676980  |
| H313  | 1.513436708   | 2.229443203  | -2.816020924 |
| H314  | 10.522984009  | -8.578077281 | 5.017119286  |
| H315  | 9.808557881   | -9.317866333 | 3.742759407  |
| H316  | 5.040382702   | -0.882416761 | 3.690896958  |
| H317  | -0.140770349  | 4.020625741  | -3.191242034 |
| H318  | 0.627029292   | 0.590745137  | -6.705072202 |
| H319  | 12.324050387  | -2.398564821 | 0.617496475  |
| H320  | 10.752842781  | 0.105773171  | -1.031467135 |
| H321  | 10.045084486  | -2.631910744 | 1.460603810  |
| H322  | 12.592679527  | -2.474368070 | -0.899827729 |
| H323  | 4.138659165   | 9.801151927  | -3.065995152 |
| H324  | 7.896010692   | -0.404380140 | 2.107370289  |
| H325  | 6.437855724   | -4.393009858 | -0.013471855 |
| H326  | 5.723274647   | 4.855580507  | -4.030220094 |
| H327  | 8.409911290   | -4.223203522 | -1.592957658 |
| H328  | 8.763421007   | 1.231241331  | -5.355334359 |
| H329  | 6.646666013   | 0.677628788  | -4.062707523 |
| H330  | 11.823732011  | -7.644606593 | 3.314971432  |
| H331  | 3.321480815   | 0.462394839  | 4.011082449  |
| H332  | 9.513278578   | -0.701733311 | 3.897806270  |
| H333  | 7.457800059   | 0.699083271  | 3.110075174  |
| H334  | 10.009862023  | -2.373894880 | 5.526218052  |
| H335  | 3.436493245   | -3.078518316 | 6.047154990  |
| H336  | 10.876578883  | -4.222632225 | -4.560382302 |
| H337  | 8.900172916   | -1.625308958 | -3.137647531 |
| H338  | 9.631441358   | -1.938319862 | -1.553643180 |
| H339  | 7.540720421   | -3.639196281 | -3.037358592 |
| H340  | 4.090782504   | 3.062386324  | -4.169417318 |
| H341  | -1.435382971  | 4.125411885  | -5.342927595 |
| H342  | -2.208343773  | 2.816420892  | -7.420178419 |
| H343  | 5.195078171   | -3.102800794 | -0.117124596 |
| H344  | 10.635045107  | -1.647463717 | 3.390954035  |
| H345  | 11.033565829  | -3.542751803 | 2.248903392  |
| H346  | 1.967517471   | -2.170343754 | 6.009371873  |
| H347  | 10.791128893  | 1.516271030  | -3.804223758 |
| H348  | 9.346771940   | 0.665195312  | -0.127562637 |
| H349  | 4.410116891   | 2.973240359  | -5.924850157 |
| H350  | 1.951324713   | 8.942026326  | -1.114979834 |
| H351  | 3.887753874   | 0.349159107  | 7.450226552  |
| H352  | 4.176081000   | 1.848511102  | 6.540637574  |
| H353  | 12.305122337  | 3.441472892  | -1.184074390 |
| H354  | 12.596675098  | 1.861996718  | -1.499176587 |
| H355  | 13.408558285  | -0.171040170 | 2.412937108  |
| H356  | 12.199420400  | 0.124798811  | 0.495811378  |
| H357  | 14.017488842  | 2.485558563  | 2.008649965  |
| H358  | 12.004408382  | 0.518238002  | 3.257916331  |
| H359  | 6.319156493   | 2.477479407  | 8.157842900  |
| H360  | -12.028481560 | 5.165779034  | 4.980563270  |
| H361  | 10.144556996  | -3.591797414 | 8.275849776  |
| H362  | 8.385009805   | -1.492618850 | 7.886553618  |
| H363  | -12.097828309 | 5.235686835  | 1.964777396  |
| H364  | -10.453689022 | 3.026130739  | 3.346156338  |
| H365  | -11.930565907 | 2.777979745  | 2.398865669  |
| H366  | -8.490234088  | 3.319776227  | -3.061509840 |
| H367  | -0.724527080  | -0.003873317 | -1.337845559 |
| Mo368 | 6.099160977   | 0.234005870  | -0.798073215 |
| N369  | 0.427331547   | -7.156417768 | -6.817714061 |
| N370  | -3.185646330  | -7.438951472 | -5.922133045 |
| N371  | -3.675272818  | -9.342941406 | -3.887066039 |
| N372  | -1.271914157  | -9.337462876 | -2.440523130 |
| N373  | -1.264534022  | -6.674619897 | -1.379024914 |
| N374  | -3.588473085  | -6.890406538 | 0.263024693  |
| N375  | -3.007511668  | -9.091015004 | 2.042386259  |
| N376  | -0.340366049  | -8.746954737 | 3.064678110  |
| N377  | 0.158063684   | -6.051550496 | 3.642018013  |
| N378  | -2.180294630  | -4.459807913 | 4.574116562  |
| N379  | -3.507994510  | -6.522130329 | 6.133601181  |
| N380  | 9.980013055   | -8.406103743 | 4.168634229  |
| N381  | 9.355947163   | -5.793815839 | 4.199963120  |
| N382  | 4.666974868   | -1.648998622 | 4.260486130  |
| N383  | 2.888811488   | -2.340979077 | 5.618081995  |



|      |               |               |              |
|------|---------------|---------------|--------------|
| N384 | 2.819788580   | -0.279291200  | 4.545099106  |
| N385 | 9.816660670   | -3.041686774  | 6.303200630  |
| N386 | -1.006799680  | -2.472063759  | -6.607250792 |
| N387 | 3.457133730   | -2.383733257  | -4.972194939 |
| N388 | -3.151405815  | -1.417452253  | -5.517081730 |
| N389 | -5.658643604  | -2.590867598  | -5.717035934 |
| N390 | -5.939120334  | -3.991276926  | -3.344187982 |
| N391 | -5.910733970  | -2.211829469  | -1.188308520 |
| N392 | -3.550029129  | 1.225847945   | -2.057839206 |
| N393 | -1.757393349  | 0.130354584   | -1.532861789 |
| N394 | -8.310741185  | -1.137319670  | -0.295485234 |
| N395 | -12.206868596 | 0.443489051   | -2.267518249 |
| N396 | -13.883802869 | 0.563614941   | -0.820122781 |
| N397 | 4.020094237   | 3.527393002   | 8.667662679  |
| N398 | -0.782921975  | 7.610854024   | 6.345446496  |
| N399 | -1.979356340  | 9.233627807   | 3.408732506  |
| N400 | -2.993599772  | 7.894887755   | 1.173697090  |
| N401 | -4.829931092  | 5.875227028   | -3.018329383 |
| N402 | -5.565971895  | 8.096795228   | -2.982041109 |
| N403 | -7.056725976  | 6.364285442   | -2.592713797 |
| N404 | -3.702893918  | 5.262427728   | 2.029570735  |
| N405 | -5.541558235  | 5.886857306   | 4.073064659  |
| N406 | -8.054009028  | 7.090848378   | 3.627181188  |
| N407 | -7.271065830  | 7.521513356   | 0.639401933  |
| N408 | -10.393114799 | 5.728776116   | 3.072572207  |
| N409 | 8.826031915   | 5.067913619   | -6.392090817 |
| N410 | 5.622817710   | 4.299528797   | -4.885033700 |
| N411 | 2.828431006   | 5.390391965   | -4.303467214 |
| N412 | 2.875781138   | 7.607309871   | -2.482857582 |
| N413 | 3.736159433   | 3.706933974   | -9.239720710 |
| N414 | 0.986715252   | 3.322657440   | -8.539894980 |
| N415 | 11.856469416  | 2.571127214   | -1.485340796 |
| N416 | 7.912179581   | 0.796059865   | -2.320894003 |
| N417 | 8.727176136   | 1.151486907   | -4.342476460 |
| N418 | 12.140993272  | 0.894273017   | 1.162788068  |
| N419 | -2.761200146  | 2.266346560   | 0.702666437  |
| N420 | -1.682945390  | 2.455278359   | 0.517852665  |
| O421 | -1.381377858  | -7.075625761  | -4.579434098 |
| O422 | -4.353836233  | -7.647986017  | -2.522959167 |
| O423 | -2.373059635  | -10.263652643 | -0.661422273 |
| O424 | -0.137958483  | -7.541758834  | 0.396100555  |
| O425 | -2.604481619  | -5.388386945  | 1.657437239  |
| O426 | -4.187113016  | -7.922838178  | 3.609687635  |
| O427 | -0.970536227  | -9.964845867  | 4.906555319  |
| O428 | 2.177667059   | -6.576289381  | 4.607654537  |
| O429 | -0.589163694  | -3.745004711  | 6.052756222  |
| O430 | -3.576373755  | -4.932075764  | 7.753723973  |
| O431 | -2.916068859  | -8.082517638  | 9.309688665  |
| O432 | 11.125106701  | -5.210113235  | 2.825800365  |
| O433 | 8.907089502   | -5.061605862  | 6.912729074  |
| O434 | 9.840004170   | -0.878039389  | 9.176565413  |
| O435 | -3.193800939  | -2.852239181  | -3.729101702 |
| O436 | 1.780738514   | -1.978014182  | -6.451147585 |
| O437 | -6.616383862  | -0.888777038  | -4.531258656 |
| O438 | -5.497222949  | 1.486250206   | -5.326543332 |
| O439 | -8.060233775  | -4.655678485  | -3.929590327 |
| O440 | -5.875543592  | -3.936498905  | 0.313813849  |
| O441 | -7.308061885  | -0.367352201  | 1.607366665  |
| O442 | -10.836067368 | -0.854475303  | 2.177054302  |
| O443 | 6.179369126   | 0.813404402   | 9.333173604  |
| O444 | -1.966455297  | 2.200777016   | 6.703047191  |
| O445 | -3.160146504  | 7.695906080   | 4.602296597  |
| O446 | -4.934644190  | 9.119634860   | 1.280124334  |
| O447 | -5.194145797  | 5.239333579   | 0.289428134  |
| O448 | -6.490928458  | 3.816797755   | 3.838620836  |
| O449 | -3.142734549  | 4.068626966   | 4.813440253  |
| O450 | -8.370771482  | 7.386956915   | 5.877535505  |
| O451 | -11.594857305 | 7.662678658   | 2.892066376  |
| O452 | -9.473004180  | 7.372478029   | 0.038965221  |
| O453 | -13.618605084 | 4.411132061   | 3.944957465  |
| O454 | -7.905582953  | 3.459961015   | -2.291467093 |
| O455 | 6.726065062   | 3.284434053   | -6.625545891 |
| O456 | 2.773909367   | 4.819600526   | -6.525243157 |

|      |              |              |               |
|------|--------------|--------------|---------------|
| O457 | 1.290667943  | 8.662829774  | -3.726970822  |
| O458 | 3.391400919  | 11.077855684 | -1.658268210  |
| O459 | 0.919650649  | 1.840739220  | -10.273003483 |
| O460 | 5.197336196  | -1.132359485 | -7.202704112  |
| O461 | 6.104797464  | 0.725761037  | -6.369382577  |
| O462 | -1.846947841 | 5.309294976  | -7.733488621  |
| O463 | 11.356607931 | 2.933208207  | 1.762272852   |
| O464 | 13.920702849 | 2.143005075  | 4.018829801   |
| O465 | 4.287420859  | -3.937966976 | -2.442840649  |
| O466 | 5.734411179  | -5.604830196 | -2.170967503  |
| O467 | 11.554387632 | -3.117446239 | -2.677549966  |
| O468 | 10.056699730 | -3.803349541 | -4.221035149  |
| O469 | 7.660719672  | -0.883878852 | 0.350808381   |
| O470 | 8.475356355  | -2.948325855 | 0.736507798   |
| O471 | 6.375683619  | -1.570674835 | -1.825751603  |
| O472 | 10.329079402 | -1.170511295 | 4.206997432   |
| O473 | 7.942945498  | -0.147080138 | 3.063003070   |
| O474 | -5.431080699 | 3.074015938  | -3.094452996  |
| O475 | 13.019925941 | -2.204753061 | -0.061048212  |
| O476 | 10.947277434 | -2.622176293 | 1.886496913   |
| S477 | -0.360394132 | 6.274241692  | 2.463865231   |
| S478 | 0.963776507  | 4.336826863  | -0.503746621  |
| S479 | 4.549100527  | 1.085543551  | -2.420154227  |
| S480 | 1.066946328  | 2.576125275  | 2.625228749   |
| S481 | 1.228528845  | 0.340902354  | -0.495967771  |
| S482 | 4.722819930  | 4.877583483  | -1.604821903  |
| S483 | 4.594143686  | -0.664356380 | 0.828022122   |
| S484 | 3.348256555  | 5.332917824  | 2.082236953   |
| S485 | 6.818878191  | 2.262674260  | 0.251014193   |
| S486 | 4.807011338  | 2.026514063  | 3.452122739   |

**Structure B 47(1)**

|                       |                      |              |               |              |
|-----------------------|----------------------|--------------|---------------|--------------|
| B 47(1)<br>associated | bm22b2n2xd47tf_car_3 |              |               |              |
|                       | C1                   | -1.678066606 | -5.818882930  | -7.291472803 |
|                       | C2                   | -0.748216083 | -5.799487303  | -8.509182119 |
|                       | C3                   | -4.010565294 | -5.796645638  | -6.514351340 |
|                       | C4                   | -3.975386577 | -6.969350569  | -5.535646418 |
|                       | C5                   | -3.481492472 | -9.335304612  | -5.171517926 |
|                       | C6                   | -2.351062907 | -9.231348522  | -4.142592696 |
|                       | C7                   | -0.171618419 | -8.255926759  | -3.595680201 |
|                       | C8                   | -0.552653293 | -7.253559950  | -2.502397159 |
|                       | C9                   | -1.768033450 | -5.225296750  | -1.911966903 |
|                       | C10                  | -2.760558852 | -5.842781114  | -0.915815205 |
|                       | C11                  | -4.651587383 | -7.321652214  | -0.550942818 |
|                       | C12                  | -4.059485951 | -8.378989485  | 0.389532810  |
|                       | C13                  | -2.676859879 | -10.386331626 | 0.593302433  |
|                       | C14                  | -1.428162948 | -10.144898980 | 1.452094171  |
|                       | C15                  | 0.735325742  | -8.995175739  | 1.643738686  |
|                       | C16                  | 0.920291109  | -7.662313458  | 2.373955726  |
|                       | C17                  | -0.026167629 | -5.413069137  | 2.808569287  |
|                       | C18                  | -1.153455566 | -5.261357643  | 3.846211885  |
|                       | C19                  | -0.004812449 | -4.280682148  | 1.746649000  |
|                       | C20                  | -0.161187255 | -2.896511867  | 2.385328009  |
|                       | C21                  | 1.273559589  | -4.356876383  | 0.905305763  |
|                       | C22                  | -3.582316186 | -5.231050214  | 4.265062725  |
|                       | C23                  | -3.818718309 | -6.520014922  | 5.076736526  |
|                       | C24                  | -4.836360461 | -4.784313955  | 3.476454410  |
|                       | C25                  | -6.081396681 | -4.773233761  | 4.370030194  |
|                       | C26                  | -4.618305425 | -3.403199475  | 2.845694330  |
|                       | C27                  | -4.131638611 | -8.927308115  | 5.071753507  |
|                       | C28                  | -3.166042692 | -9.185939395  | 6.210842247  |
|                       | C29                  | 10.502613011 | -8.271899190  | 1.883760860  |
|                       | C30                  | 10.214619943 | -6.852698729  | 2.376199719  |
|                       | C31                  | 8.613109123  | -5.534999244  | 3.775674356  |
|                       | C32                  | 8.890242596  | -5.638122924  | 5.288298188  |
|                       | C33                  | 7.112953945  | -5.367894380  | 3.477109566  |
|                       | C34                  | 6.491683611  | -4.101853627  | 4.074058538  |
|                       | C35                  | 5.092618310  | -3.873244267  | 3.501079258  |
|                       | C36                  | 3.258271105  | -2.499526430  | 4.506082414  |
| C37                   | 9.882001734          | -4.534435814 | 7.234167689   |              |

|      |               |              |              |
|------|---------------|--------------|--------------|
| C38  | 9.013054909   | -3.630674831 | 8.083745952  |
| C39  | -1.061420815  | -1.655269285 | -5.814404543 |
| C40  | -2.444849216  | -1.248061571 | -5.280948360 |
| C41  | -0.029930509  | -1.392657638 | -4.695183483 |
| C42  | 1.360149451   | -2.026910054 | -4.890248051 |
| C43  | 2.365068334   | -1.177481210 | -5.667267235 |
| C44  | -4.078860406  | 0.578811401  | -5.260877800 |
| C45  | -5.423778759  | -0.103013771 | -5.518721332 |
| C46  | -4.144524681  | 2.059173486  | -5.691423228 |
| C47  | -6.619187602  | -1.994781670 | -6.490369854 |
| C48  | -6.873557640  | -2.895562327 | -5.272489545 |
| C49  | -5.954786157  | -3.854411448 | -3.200965140 |
| C50  | -5.896917727  | -3.136058869 | -1.854402291 |
| C51  | -5.881722120  | -0.994439091 | -0.645088452 |
| C52  | -7.278899828  | -0.830414176 | 0.001216973  |
| C53  | -5.355265774  | 0.433078205  | -0.857753711 |
| C54  | -3.922604675  | 0.581047106  | -1.255674327 |
| C55  | -2.805382411  | -0.210051162 | -1.134501750 |
| C56  | -2.163322094  | 1.721549701  | -2.023893753 |
| C57  | -9.680843704  | -0.536033508 | -0.476003355 |
| C58  | -10.210971528 | -1.486648076 | 0.592266919  |
| C59  | -10.569186181 | -0.604290903 | -1.744685887 |
| C60  | -11.849829912 | 0.172578431  | -1.685888272 |
| C61  | -12.923243561 | 0.070745961  | -0.821542799 |
| C62  | -13.289099687 | 1.659640634  | -2.321785321 |
| C63  | 3.841601366   | -0.006755726 | 9.117909691  |
| C64  | 5.321518320   | -0.342396993 | 9.136707069  |
| C65  | 3.332705406   | -0.345378787 | 7.691044536  |
| C66  | 1.853411337   | -0.099784724 | 7.510538473  |
| C67  | 0.902707843   | -1.088008243 | 7.829001113  |
| C68  | 1.382406769   | 1.125368874  | 7.006779481  |
| C69  | -0.467059427  | -0.867133989 | 7.645914350  |
| C70  | 0.019189871   | 1.364537256  | 6.829298936  |
| C71  | -0.906224036  | 0.364893227  | 7.146660738  |
| C72  | -0.857771284  | 6.421036249  | 6.453059845  |
| C73  | -2.167160578  | 7.041783263  | 5.947517407  |
| C74  | -0.509833611  | 5.178144807  | 5.620564094  |
| C75  | -3.205515144  | 8.938440477  | 4.775503699  |
| C76  | -3.768847633  | 8.352098070  | 3.480135869  |
| C77  | -3.416407522  | 6.791043337  | 1.603038401  |
| C78  | -4.167276687  | 5.480096884  | 1.918042309  |
| C79  | -2.207045606  | 6.578852662  | 0.672302721  |
| C80  | -2.460660782  | 5.917688474  | -0.687161872 |
| C81  | -3.194389004  | 6.757271544  | -1.750966183 |
| C82  | -5.609875837  | 7.378116038  | -1.521242549 |
| C83  | -4.438194262  | 3.526208024  | 3.357855610  |
| C84  | -5.662758254  | 3.768142702  | 4.265774485  |
| C85  | -3.522069754  | 2.496478224  | 4.031315772  |
| C86  | -6.518307050  | 4.994209090  | 6.204879631  |
| C87  | -7.814904157  | 5.790056224  | 6.058754125  |
| C88  | -9.266996566  | 7.119680136  | 4.572341365  |
| C89  | -10.580485761 | 6.408105980  | 4.175560943  |
| C90  | -8.913928965  | 8.213232341  | 3.535583123  |
| C91  | -8.550143442  | 7.604820871  | 2.185878171  |
| C92  | -11.620183869 | 4.322222727  | 3.382164200  |
| C93  | -12.643267584 | 4.053808665  | 4.480035699  |
| C94  | -11.125405670 | 2.983728515  | 2.769176934  |
| C95  | -10.237339970 | 3.190818046  | 1.562258568  |
| C96  | -10.802910995 | 3.362244650  | 0.290025526  |
| C97  | -8.839304723  | 3.263227181  | 1.679761031  |
| C98  | -10.009270624 | 3.628840464  | -0.828526569 |
| C99  | -8.029655994  | 3.551322988  | 0.576303734  |
| C100 | -8.627623763  | 3.736641533  | -0.667663345 |
| C101 | 8.218634025   | 5.695038270  | -3.663250301 |
| C102 | 6.972965587   | 5.104982672  | -4.302397005 |
| C103 | 4.566301552   | 4.608144760  | -3.962120110 |
| C104 | 3.482354997   | 5.686350496  | -4.066163744 |
| C105 | 2.081178041   | 7.234388484  | -2.779139630 |
| C106 | 2.231322955   | 8.222713679  | -1.625522599 |
| C107 | 3.064759321   | 8.764185715  | 0.588058096  |
| C108 | 3.718742512   | 10.099080930 | 0.301355348  |
| C109 | 3.526914030   | 4.360441571  | -8.464294665 |
| C110 | 2.002665492   | 4.498931406  | -8.564551055 |

|       |              |               |              |
|-------|--------------|---------------|--------------|
| C111  | 3.881816680  | 3.075440472   | -7.680617297 |
| C112  | 5.356734739  | 2.683894462   | -7.893814253 |
| C113  | 5.772911807  | 1.608044938   | -6.916834984 |
| C114  | -0.069023771 | 5.263514771   | -7.504707596 |
| C115  | -0.448385598 | 6.645402574   | -7.006376010 |
| C116  | -0.813460482 | 4.097708250   | -6.806608386 |
| C117  | -0.196168863 | 3.701579228   | -5.488226568 |
| C118  | -0.466183623 | 4.420292740   | -4.309973561 |
| C119  | 0.732910198  | 2.647778519   | -5.431366134 |
| C120  | 0.200284056  | 4.106378786   | -3.119896004 |
| C121  | 1.401998561  | 2.336320538   | -4.241642810 |
| C122  | 1.143865668  | 3.072280901   | -3.081157786 |
| C123  | 10.848709830 | 2.056039996   | 0.430554197  |
| C124  | 11.393460764 | 1.573244675   | 1.784461070  |
| C125  | 10.072858894 | 0.948742855   | -0.301922936 |
| C126  | 9.354631924  | 1.367480962   | -1.549081875 |
| C127  | 9.907972870  | 1.858066992   | -2.716365298 |
| C128  | 7.736821197  | 1.535665667   | -3.007410216 |
| C129  | 12.609992096 | -0.096549992  | 3.067443424  |
| C130  | 13.481844273 | 0.924504819   | 3.763881531  |
| C131  | 5.289689490  | -3.951954958  | -2.540977988 |
| C132  | 5.916220412  | -3.510711980  | -1.248896034 |
| C133  | 7.015175460  | -2.389494377  | -1.453704890 |
| C134  | 8.086333746  | -2.891098290  | -2.463545478 |
| C135  | 9.301138069  | -1.952496258  | -2.560284589 |
| C136  | 10.475078071 | -2.545938854  | -3.288116593 |
| C137  | 7.723688776  | -2.233717422  | -0.073387731 |
| C138  | 3.508042134  | 2.239501968   | 1.103424993  |
| Fe139 | 5.024451075  | 2.783249352   | -0.110232117 |
| Fe140 | 1.355938679  | 2.140343761   | 1.011989834  |
| Fe141 | 3.270665305  | 2.514007797   | 3.099872331  |
| Fe142 | 3.293900798  | 4.243813253   | 1.139124205  |
| Fe143 | 1.215844200  | 4.246980752   | 2.765400153  |
| Fe144 | 4.966939076  | 1.069130680   | 1.857006283  |
| Fe145 | 3.483123060  | 0.828553267   | -0.163950976 |
| H146  | 0.998370190  | -5.990440446  | -7.474951034 |
| H147  | 0.686211676  | -4.457807454  | -7.942744462 |
| H148  | -3.316010566 | -5.751541384  | -8.535290715 |
| H149  | -1.171446573 | -5.130686586  | -9.274752863 |
| H150  | -0.774493782 | -6.813314102  | -8.945433456 |
| H151  | -3.887114208 | -4.887320730  | -5.909833162 |
| H152  | -3.365251949 | -8.244137707  | -7.023676587 |
| H153  | -5.002979972 | -5.768969111  | -6.983764267 |
| H154  | -3.306789341 | -10.217409012 | -5.801519959 |
| H155  | -1.291286265 | -7.990655706  | -5.391169512 |
| H156  | -4.412329953 | -9.489499290  | -4.609845075 |
| H157  | -0.935621817 | -4.821777446  | -1.320520470 |
| H158  | -1.468749194 | -6.026088232  | -3.890667902 |
| H159  | 0.685151766  | -7.870575622  | -4.165008770 |
| H160  | -5.135283730 | -6.561715407  | 0.076450102  |
| H161  | -3.740429662 | -6.844261256  | -2.440779879 |
| H162  | 0.134774519  | -9.181131770  | -3.092755172 |
| H163  | -2.250988182 | -4.395980444  | -2.447904664 |
| H164  | -2.985594574 | -9.217284912  | -1.170208754 |
| H165  | -5.419033635 | -7.800841911  | -1.175036296 |
| H166  | 1.391201960  | -5.343034946  | 0.432846125  |
| H167  | 1.255643567  | -3.599061152  | 0.107123114  |
| H168  | 2.163996334  | -4.164963888  | 1.524150201  |
| H169  | -0.867797080 | -4.448568736  | 1.082834485  |
| H170  | -2.442807334 | -11.196855636 | -0.112782494 |
| H171  | -3.753833829 | -3.387477268  | 2.166555998  |
| H172  | -3.839463556 | -7.702549634  | 3.357592668  |
| H173  | -6.303051722 | -5.765259345  | 4.789509430  |
| H174  | -0.181081746 | -2.123316446  | 1.602068204  |
| H175  | 0.681166677  | -2.660827234  | 3.051441330  |
| H176  | 3.333947574  | -0.683684646  | 9.832430431  |
| H177  | -5.504169016 | -3.111678193  | 2.263400636  |
| H178  | -6.954949019 | -4.446858903  | 3.786960546  |
| H179  | -4.458704140 | -2.644136788  | 3.628591616  |
| H180  | -5.951280681 | -4.071538845  | 5.209348853  |
| H181  | -5.000944208 | -5.514953520  | 2.663609075  |
| H182  | -3.343878010 | -4.468206738  | 5.020465123  |
| H183  | -2.592973829 | -5.464511045  | 2.370405860  |

|      |               |               |              |
|------|---------------|---------------|--------------|
| H184 | -1.092402651  | -2.804353551  | 2.963706407  |
| H185 | -2.598043338  | 2.403596394   | 3.435950449  |
| H186 | -4.052152489  | 1.529135687   | 4.015882171  |
| H187 | -2.882705627  | 2.121621083   | 5.848069090  |
| H188 | -2.782497681  | -0.132504663  | 7.169691219  |
| H189 | -0.324607970  | 2.309714464   | 6.408347283  |
| H190 | 2.095841707   | 1.896420108   | 6.708148370  |
| H191 | 1.235001630   | -2.052566901  | 8.222969453  |
| H192 | -0.822431568  | -6.967102567  | 1.560664600  |
| H193 | 1.546250272   | -9.072300974  | 0.903457817  |
| H194 | 0.881203861   | -9.791563065  | 2.385175174  |
| H195 | -0.686911542  | -8.777979874  | 0.076827827  |
| H196 | -3.457582771  | -10.741897017 | 1.277196720  |
| H197 | -1.187944300  | -1.655576520  | 7.879159403  |
| H198 | 0.903934331   | -5.379652663  | 3.390852022  |
| H199 | -5.161691523  | -8.972140759  | 5.460289905  |
| H200 | -4.006257145  | -9.750530842  | 4.350011173  |
| H201 | -2.161060186  | -8.716930528  | 6.091054579  |
| H202 | 10.937089734  | -4.245529815  | 7.357416369  |
| H203 | 4.362878225   | -0.748928485  | -5.784834928 |
| H204 | 6.490341414   | -5.461378888  | -2.524033754 |
| H205 | 5.482533081   | 2.290644746   | -8.912795985 |
| H206 | 6.003908839   | 3.566079307   | -7.780044658 |
| H207 | 3.242973318   | 2.240488686   | -8.007340230 |
| H208 | 0.288387181   | 7.442360611   | -7.264695161 |
| H209 | 3.839791720   | 4.207307109   | -9.508847037 |
| H210 | 0.065295222   | -0.302981237  | -4.563448896 |
| H211 | 1.268419635   | -2.990102500  | -5.422343272 |
| H212 | 1.917978449   | 5.425535986   | -6.708777995 |
| H213 | -0.380094345  | 5.262102311   | -8.568434406 |
| H214 | 4.041098773   | 5.726167830   | -6.987794630 |
| H215 | 3.931984593   | -1.860607776  | -4.482843845 |
| H216 | 3.664844044   | 3.237647437   | -6.613500731 |
| H217 | 5.160835734   | 5.568510604   | -8.185048181 |
| H218 | -0.962984700  | -1.475824763  | -7.870323508 |
| H219 | -0.457958815  | -1.793680193  | -3.764769539 |
| H220 | 6.556207371   | 3.017649430   | -5.783033718 |
| H221 | 1.784210201   | -2.268631260  | -3.905000427 |
| H222 | -5.267198326  | -1.529034196  | 0.093362017  |
| H223 | -2.678017088  | -1.209417458  | -0.734130291 |
| H224 | -6.922483421  | -4.374393972  | -3.246675640 |
| H225 | -4.935119695  | -2.576756439  | -4.569260277 |
| H226 | -8.154117730  | -1.229514190  | -1.809950894 |
| H227 | -13.115424892 | -0.561120652  | 0.037936224  |
| H228 | -9.898968442  | -2.550668333  | 0.445617554  |
| H229 | -10.749578157 | -1.662742884  | -2.000213697 |
| H230 | -9.678029848  | 0.484510731   | -0.064113371 |
| H231 | -13.804014109 | 2.458770117   | -2.848484952 |
| H232 | -5.513348198  | 0.970520151   | 0.091684967  |
| H233 | -5.987173951  | 0.937555761   | -1.607377184 |
| H234 | -14.730704502 | 1.214814085   | -0.818606128 |
| H235 | -9.984674251  | -0.176530869  | -2.573617344 |
| H236 | -5.882957309  | -1.290732616  | -2.781342211 |
| H237 | -5.174404875  | -4.628912138  | -3.202622813 |
| H238 | -7.521604936  | -1.386687602  | -6.633912457 |
| H239 | -1.536789535  | 2.513905556   | -2.425643735 |
| H240 | -6.500515105  | -2.635746251  | -7.373428202 |
| H241 | 3.797028391   | 1.589878328   | 10.405186135 |
| H242 | 2.704021065   | 1.693723854   | 9.192664772  |
| H243 | -2.805308294  | 4.950111570   | 3.387840112  |
| H244 | -4.832127921  | 3.069563975   | 2.438333709  |
| H245 | -4.762442373  | 5.411423131   | 5.104823116  |
| H246 | -4.116538654  | 2.589346906   | -2.026048761 |
| H247 | -5.285147537  | 3.562989720   | -3.487279004 |
| H248 | -6.222311910  | 3.690803636   | -2.204888338 |
| H249 | -3.210809628  | 2.560919415   | -5.400376597 |
| H250 | -4.253622452  | 2.125914436   | -6.787042959 |
| H251 | -8.086744646  | 8.816530425   | 3.937935346  |
| H252 | -9.794003134  | 8.855388236   | 3.406839697  |
| H253 | -6.482338478  | 7.794967079   | 2.548538623  |
| H254 | -6.944410479  | 6.832585354   | 1.175261077  |
| H255 | -6.124665653  | 9.314590228   | -1.108695018 |
| H256 | -2.791225811  | 6.528014404   | -2.748208310 |

|      |               |               |              |
|------|---------------|---------------|--------------|
| H257 | -10.465996360 | 3.745836463   | -1.814666339 |
| H258 | -8.352086076  | 3.089223427   | 2.643309635  |
| H259 | -7.112334908  | 5.955752268   | -1.498490851 |
| H260 | -1.459547772  | 5.966717946   | 1.201441371  |
| H261 | -2.086476039  | 7.182583080   | 3.229801586  |
| H262 | -2.972851203  | 4.951187591   | -0.559624801 |
| H263 | -4.583554294  | -1.393578012  | -6.844727870 |
| H264 | -2.933470840  | 9.985874540   | 4.583646084  |
| H265 | -2.303825800  | 0.301090605   | -6.541585962 |
| H266 | -1.743695970  | 7.566490707   | 0.510431971  |
| H267 | -6.950237348  | 3.659746627   | 0.697112570  |
| H268 | -5.960918287  | 2.074998746   | -4.966432032 |
| H269 | -4.029953724  | 8.933130530   | 5.501435252  |
| H270 | -4.510327039  | 9.108569127   | -1.673501552 |
| H271 | -7.646796181  | 7.605204049   | -1.425755272 |
| H272 | 0.261593962   | -0.684817347  | -7.055629143 |
| H273 | -1.117231177  | -2.749455150  | -5.967860625 |
| H274 | -11.885113210 | 3.286523242   | 0.162734349  |
| H275 | -3.981087286  | 0.549681377   | -4.163065457 |
| H276 | -4.163743459  | 7.433579337   | 1.117480218  |
| H277 | -3.001694299  | 7.823679038   | -1.580649572 |
| H278 | -1.465866435  | 5.684664837   | -1.092460331 |
| H279 | -4.919664530  | 5.544128441   | -2.051567694 |
| H280 | -6.809012994  | 3.985117721   | 6.534199279  |
| H281 | -7.438208215  | 6.110048529   | 4.067740500  |
| H282 | -9.488926593  | 7.613001857   | 5.529750343  |
| H283 | -5.954188596  | 5.465984487   | 7.020632708  |
| H284 | -9.577652509  | 4.642317388   | 3.968089880  |
| H285 | 7.935366099   | 6.518878110   | -2.991324934 |
| H286 | 8.637967257   | 4.890971626   | -3.023525719 |
| H287 | 10.152874303  | 2.872972688   | 0.671443725  |
| H288 | 10.052170382  | 6.352375265   | -4.265194127 |
| H289 | 9.271417733   | 5.447518378   | -5.386069731 |
| H290 | 0.457411205   | 4.789298690   | 5.962386450  |
| H291 | -1.787749524  | 5.461472175   | 7.992259655  |
| H292 | -1.128985584  | 8.648816749   | 5.195215474  |
| H293 | -1.287958476  | 4.417244190   | 5.774847600  |
| H294 | -1.091423931  | 6.871461113   | 8.441578318  |
| H295 | 3.669727067   | 8.259462372   | 1.358484840  |
| H296 | -0.042103667  | 7.154107993   | 6.350225898  |
| H297 | 6.579599401   | -6.263390985  | 3.838482557  |
| H298 | 9.166871601   | -4.689203680  | 3.351217427  |
| H299 | 3.506409917   | 6.988361667   | -0.511036670 |
| H300 | 1.916123780   | -1.118231510  | 5.168789582  |
| H301 | 2.105592345   | 7.810627014   | -3.712512302 |
| H302 | 2.138873332   | 1.530595110   | -4.223605922 |
| H303 | 1.062257666   | 6.818352445   | -2.693898224 |
| H304 | 4.427366093   | -4.713013312  | 3.740571286  |
| H305 | 3.421080908   | 5.693586131   | -2.026861657 |
| H306 | 5.146919595   | -3.818588006  | 2.401285407  |
| H307 | 7.011152051   | -5.344060837  | 2.379524194  |
| H308 | 7.109748443   | -3.223052389  | 3.834947141  |
| H309 | 6.433079048   | -4.173011083  | 5.172187704  |
| H310 | -0.802139082  | 3.240167296   | -7.494512756 |
| H311 | 8.657315243   | -7.645682509  | 3.338985156  |
| H312 | 10.285965387  | -8.269440470  | 0.804176356  |
| H313 | 1.675690237   | 2.855185508   | -2.152382625 |
| H314 | 10.182280268  | -9.690133746  | 3.344249375  |
| H315 | 9.507861745   | -10.074249845 | 1.901708383  |
| H316 | 4.900434008   | -1.756357933  | 3.622090716  |
| H317 | 0.010177294   | 4.672129780   | -2.205827751 |
| H318 | 0.946303055   | 2.062709449   | -6.328716338 |
| H319 | 12.246015156  | -2.696349595  | 0.548368011  |
| H320 | 10.778534542  | 0.140764012   | -0.566967738 |
| H321 | 9.926881011   | -3.070880416  | 1.232277890  |
| H322 | 12.582276152  | -2.432927674  | -0.932943276 |
| H323 | 4.390643222   | 10.111481572  | -0.590140426 |
| H324 | 7.759450917   | -1.006729966  | 2.296952471  |
| H325 | 6.366787262   | -4.359170242  | -0.712922642 |
| H326 | 5.909073100   | 5.500126041   | -2.593175782 |
| H327 | 8.428239261   | -3.885025471  | -2.134465485 |
| H328 | 8.940678434   | 2.258396348   | -4.587370209 |
| H329 | 6.771450380   | 1.495793906   | -3.496659298 |

|       |               |              |              |
|-------|---------------|--------------|--------------|
| H330  | 11.590476632  | -8.423795988 | 1.981833199  |
| H331  | 3.181661114   | -0.473544554 | 4.164906428  |
| H332  | 9.313446228   | -1.728495178 | 4.012924512  |
| H333  | 7.316814670   | -0.132156908 | 3.501702159  |
| H334  | 9.734306169   | -3.735733298 | 5.238029031  |
| H335  | 3.139042464   | -4.386273694 | 5.318811394  |
| H336  | 10.990542430  | -3.309624905 | -4.939922662 |
| H337  | 9.002792457   | -1.026511650 | -3.073964622 |
| H338  | 9.661761367   | -1.680897020 | -1.562687188 |
| H339  | 7.621540553   | -2.995497414 | -3.455213183 |
| H340  | 4.277377624   | 3.829881575  | -3.237556196 |
| H341  | -1.182383066  | 5.244712458  | -4.337120665 |
| H342  | -1.859676019  | 4.415833042  | -6.676609830 |
| H343  | 5.137649348   | -3.054563480 | -0.621998058 |
| H344  | 10.449484426  | -2.554388675 | 3.349313195  |
| H345  | 10.881786027  | -4.152107127 | 1.827533443  |
| H346  | 1.695754122   | -3.456478425 | 5.436308321  |
| H347  | 10.927452607  | 2.129677344  | -2.963781621 |
| H348  | 9.340795873   | 0.508009571  | 0.386581455  |
| H349  | 4.688998812   | 4.154015289  | -4.947821419 |
| H350  | 2.062523163   | 8.934813666  | 1.011593653  |
| H351  | 3.567967572   | -1.404119621 | 7.504443656  |
| H352  | 3.898129540   | 0.257960334  | 6.962510723  |
| H353  | 12.358872217  | 3.403501510  | 0.089093687  |
| H354  | 12.660607196  | 1.926658075  | -0.547738100 |
| H355  | 13.247056886  | -0.966759524 | 2.843366773  |
| H356  | 12.158414309  | -0.208030048 | 0.989026104  |
| H357  | 13.960638713  | 1.678667968  | 3.094904444  |
| H358  | 11.816442560  | -0.434955598 | 3.752632178  |
| H359  | 5.980632150   | 0.487222747  | 8.783860518  |
| H360  | -12.260859932 | 4.164656686  | 5.521949914  |
| H361  | 9.761427806   | -5.556506378 | 7.632448888  |
| H362  | 7.996326799   | -3.420215105 | 7.671498024  |
| H363  | -12.127875391 | 4.910591219  | 2.601243559  |
| H364  | -10.596346415 | 2.407645822  | 3.544979812  |
| H365  | -12.016496636 | 2.404144908  | 2.489634928  |
| H366  | -8.349367544  | 4.092932771  | -2.563180445 |
| H367  | 1.070170290   | -0.709348714 | 0.323002905  |
| H368  | -0.725062486  | 0.279695695  | -1.510948570 |
| Mo369 | 6.109046444   | 0.329469795  | -0.469950546 |
| N370  | 0.633645159   | -5.431626018 | -8.251138105 |
| N371  | -3.011340587  | -5.860543222 | -7.571017664 |
| N372  | -3.596479545  | -8.170475616 | -6.035631042 |
| N373  | -1.254548379  | -8.530934551 | -4.527852961 |
| N374  | -1.279174406  | -6.177047874 | -2.899355586 |
| N375  | -3.674695993  | -6.700064693 | -1.430131805 |
| N376  | -3.178264194  | -9.251325010 | -0.165521093 |
| N377  | -0.546498092  | -9.210196823 | 0.994782891  |
| N378  | -0.059237958  | -6.737048003 | 2.194635606  |
| N379  | -2.428215805  | -5.358460694 | 3.373741925  |
| N380  | -3.848037482  | -7.684627239 | 4.379376622  |
| N381  | 9.685547314   | -9.298905389 | 2.541371328  |
| N382  | 9.107574111   | -6.746617258 | 3.133546252  |
| N383  | 4.482779035   | -2.624484240 | 3.973839942  |
| N384  | 2.612187294   | -3.574373398 | 5.013727145  |
| N385  | 2.640818468   | -1.308373517 | 4.478585721  |
| N386  | 9.503285420   | -4.559252139 | 5.835140071  |
| N387  | -0.748851227  | -0.915875383 | -7.042733959 |
| N388  | 3.650634266   | -1.286644765 | -5.280357520 |
| N389  | -2.936235073  | -0.104532439 | -5.832126708 |
| N390  | -5.450350896  | -1.141207681 | -6.374915529 |
| N391  | -5.845952570  | -3.014615112 | -4.380653391 |
| N392  | -5.892144597  | -1.766411008 | -1.880297969 |
| N393  | -3.487631895  | 1.773224471  | -1.820278363 |
| N394  | -1.738080790  | 0.516541285  | -1.626751201 |
| N395  | -8.327858895  | -0.927689466 | -0.854505777 |
| N396  | -12.091897395 | 1.168303169  | -2.618974684 |
| N397  | -13.823732644 | 1.026966218  | -1.238708817 |
| N398  | 3.667030617   | 1.418854791  | 9.405093710  |
| N399  | -0.946548144  | 6.034656837  | 7.869233794  |
| N400  | -2.055249289  | 8.251736593  | 5.329623298  |
| N401  | -2.974165903  | 7.493397623  | 2.804355896  |
| N402  | -4.640147594  | 6.511330640  | -1.811936817 |

|      |               |               |              |
|------|---------------|---------------|--------------|
| N403 | -5.351794330  | 8.684179078   | -1.298712701 |
| N404 | -6.878199434  | 6.942848004   | -1.374952762 |
| N405 | -3.735303235  | 4.750833181   | 2.980949938  |
| N406 | -5.643231106  | 4.890227504   | 5.043770306  |
| N407 | -8.135888766  | 6.226296721   | 4.805384015  |
| N408 | -7.227645016  | 7.321197690   | 2.024083829  |
| N409 | -10.489780464 | 5.085849029   | 3.891454053  |
| N410 | 9.137697340   | 6.188870132   | -4.692166335 |
| N411 | 5.848189884   | 5.176323109   | -3.564413253 |
| N412 | 3.065485711   | 6.171769994   | -2.878110806 |
| N413 | 3.022227015   | 7.894240822   | -0.575251739 |
| N414 | 4.156082022   | 5.603135418   | -8.001359621 |
| N415 | 1.378027022   | 5.128835368   | -7.528872831 |
| N416 | 11.921584601  | 2.623389126   | -0.409911294 |
| N417 | 7.987382531   | 1.179417991   | -1.751976449 |
| N418 | 8.871881653   | 1.955420933   | -3.619894430 |
| N419 | 12.080347623  | 0.396739593   | 1.807362724  |
| N420 | -1.639378287  | 2.076698308   | 0.945468878  |
| N421 | -0.508955228  | 2.077723382   | 0.948527894  |
| O422 | -1.255116185  | -5.849290450  | -6.120866250 |
| O423 | -4.294618528  | -6.808736217  | -4.345754596 |
| O424 | -2.444974521  | -9.792131901  | -3.039100295 |
| O425 | -0.227271244  | -7.427378363  | -1.317470490 |
| O426 | -2.720262341  | -5.562535005  | 0.293016687  |
| O427 | -4.413155287  | -8.446720925  | 1.578822747  |
| O428 | -1.248805732  | -10.821620420 | 2.473450017  |
| O429 | 1.934735182   | -7.480161737  | 3.062695003  |
| O430 | -0.895342293  | -5.059003991  | 5.042885021  |
| O431 | -3.976676224  | -6.495055543  | 6.308783453  |
| O432 | -3.430235134  | -9.905079682  | 7.162125166  |
| O433 | 10.973209025  | -5.916360996  | 2.044706772  |
| O434 | 8.570074558   | -6.659834973  | 5.920604670  |
| O435 | 9.372987653   | -3.171031264  | 9.155690095  |
| O436 | -3.056055700  | -1.903957745  | -4.413493071 |
| O437 | 2.019274168   | -0.438405080  | -6.616513246 |
| O438 | -6.435585095  | 0.299274004   | -4.901229734 |
| O439 | -5.230807108  | 2.740455593   | -5.044266048 |
| O440 | -7.962066629  | -3.469546491  | -5.154287366 |
| O441 | -5.884825809  | -3.783049978  | -0.803847246 |
| O442 | -7.393096903  | -0.526278661  | 1.192266340  |
| O443 | -10.941984438 | -1.154074496  | 1.508741196  |
| O444 | 5.778653210   | -1.425613583  | 9.472519272  |
| O445 | -2.242139952  | 0.644400673   | 6.935350494  |
| O446 | -3.267549283  | 6.480701652   | 6.100276264  |
| O447 | -4.904530476  | 8.704246927   | 3.099569411  |
| O448 | -5.135708755  | 5.147425365   | 1.210771833  |
| O449 | -6.589198103  | 2.944914214   | 4.288830330  |
| O450 | -3.237449159  | 2.901751391   | 5.373186178  |
| O451 | -8.525771463  | 5.990073938   | 7.051840425  |
| O452 | -11.646216561 | 7.038215301   | 4.132952973  |
| O453 | -9.411552356  | 7.298640027   | 1.347165739  |
| O454 | -13.793185287 | 3.717961562   | 4.249326421  |
| O455 | -7.797862724  | 4.064964034   | -1.757307704 |
| O456 | 7.031360375   | 4.566949818   | -5.437356975 |
| O457 | 3.047732497   | 6.079689489   | -5.170913276 |
| O458 | 1.588141592   | 9.287100871   | -1.656796142 |
| O459 | 3.569886282   | 11.086660108  | 1.004087833  |
| O460 | 1.375692285   | 4.035885530   | -9.532051812 |
| O461 | 5.516694960   | 0.417225882   | -7.071429047 |
| O462 | 6.417206656   | 2.018903376   | -5.807672554 |
| O463 | -1.483362363  | 6.910964989   | -6.412269524 |
| O464 | 11.283359251  | 2.264416098   | 2.813855199  |
| O465 | 13.718839345  | 0.895203303   | 4.963443805  |
| O466 | 4.396138732   | -3.369265361  | -3.138565821 |
| O467 | 5.793072827   | -5.098055404  | -3.103243024 |
| O468 | 11.610137921  | -2.673331407  | -2.835102926 |
| O469 | 10.167445920  | -2.942997780  | -4.551715061 |
| O470 | 7.591173279   | -1.076587665  | 0.484433763  |
| O471 | 8.398217695   | -3.179126970  | 0.398674121  |
| O472 | 6.425063461   | -1.210333056  | -1.865095777 |
| O473 | 10.111157753  | -2.271611703  | 4.239795189  |
| O474 | 7.780699820   | -0.964800774  | 3.287398548  |
| O475 | -5.294671256  | 3.813430810   | -2.523899894 |



|               |                     |              |              |              |
|---------------|---------------------|--------------|--------------|--------------|
|               | O476                | 12.969273946 | -2.356267655 | -0.036923304 |
|               | O477                | 10.813364958 | -3.172705682 | 1.679937937  |
|               | S478                | -0.411267644 | 5.522854084  | 3.804903447  |
|               | S479                | 1.137445268  | 4.440473478  | 0.542617521  |
|               | S480                | 4.610456402  | 1.516577077  | -1.933798268 |
|               | S481                | 1.074687539  | 1.990078119  | 3.299731737  |
|               | S482                | 1.373942640  | 0.287897164  | -0.562486190 |
|               | S483                | 4.823052396  | 5.000867350  | -0.324444383 |
|               | S484                | 4.474400453  | -0.860015013 | 0.844506876  |
|               | S485                | 3.385032275  | 4.799575934  | 3.298437324  |
|               | S486                | 6.809299456  | 2.028392419  | 1.049190577  |
|               | S487                | 4.754191258  | 1.130883247  | 4.046593914  |
| B 47(1)<br>TS | bm22b2n2xd47tf_orig |              |              |              |
|               | C2                  | -0.748       | -5.824       | -8.514       |
|               | C3                  | -4.012       | -5.806       | -6.521       |
|               | C4                  | -3.977       | -6.973       | -5.537       |
|               | C5                  | -3.478       | -9.335       | -5.158       |
|               | C6                  | -2.341       | -9.230       | -4.137       |
|               | C7                  | -0.169       | -8.236       | -3.594       |
|               | C8                  | -0.557       | -7.241       | -2.498       |
|               | C9                  | -1.781       | -5.216       | -1.908       |
|               | C10                 | -2.780       | -5.829       | -0.916       |
|               | C11                 | -4.659       | -7.322       | -0.552       |
|               | C12                 | -4.067       | -8.380       | 0.389        |
|               | C13                 | -2.681       | -10.387      | 0.589        |
|               | C14                 | -1.434       | -10.148      | 1.451        |
|               | C15                 | 0.740        | -9.014       | 1.640        |
|               | C16                 | 0.929        | -7.682       | 2.372        |
|               | C17                 | -0.025       | -5.433       | 2.810        |
|               | C18                 | -1.150       | -5.294       | 3.852        |
|               | C19                 | -0.026       | -4.300       | 1.749        |
|               | C20                 | -0.222       | -2.921       | 2.387        |
|               | C21                 | 1.256        | -4.346       | 0.912        |
|               | C22                 | -3.576       | -5.242       | 4.276        |
|               | C23                 | -3.816       | -6.527       | 5.089        |
|               | C24                 | -4.831       | -4.790       | 3.493        |
|               | C25                 | -6.070       | -4.771       | 4.397        |
|               | C26                 | -4.608       | -3.412       | 2.859        |
|               | C27                 | -4.152       | -8.928       | 5.083        |
|               | C28                 | -3.175       | -9.205       | 6.207        |
|               | C29                 | 10.510       | -8.286       | 1.878        |
|               | C30                 | 10.211       | -6.865       | 2.365        |
|               | C31                 | 8.613        | -5.545       | 3.768        |
|               | C32                 | 8.893        | -5.648       | 5.282        |
|               | C33                 | 7.112        | -5.373       | 3.478        |
|               | C34                 | 6.502        | -4.101       | 4.073        |
|               | C35                 | 5.084        | -3.884       | 3.541        |
|               | C36                 | 3.266        | -2.487       | 4.550        |
|               | C37                 | 9.888        | -4.542       | 7.230        |
|               | C38                 | 9.021        | -3.633       | 8.076        |
|               | C39                 | -1.075       | -1.663       | -5.825       |
|               | C40                 | -2.455       | -1.247       | -5.293       |
|               | C41                 | -0.047       | -1.399       | -4.700       |
|               | C42                 | 1.344        | -2.037       | -4.883       |
|               | C43                 | 2.352        | -1.187       | -5.654       |
|               | C44                 | -4.080       | 0.586        | -5.262       |
|               | C45                 | -5.424       | -0.099       | -5.516       |
|               | C46                 | -4.153       | 2.068        | -5.689       |
|               | C47                 | -6.621       | -1.987       | -6.495       |
|               | C48                 | -6.864       | -2.905       | -5.289       |
|               | C49                 | -5.954       | -3.855       | -3.211       |
|               | C50                 | -5.912       | -3.138       | -1.863       |
|               | C51                 | -5.895       | -1.001       | -0.647       |
|               | C52                 | -7.294       | -0.850       | -0.006       |
|               | C53                 | -5.384       | 0.432        | -0.855       |
|               | C54                 | -3.952       | 0.600        | -1.246       |
|               | C55                 | -2.821       | -0.172       | -1.118       |
|               | C56                 | -2.206       | 1.769        | -2.004       |
|               | C57                 | -9.686       | -0.538       | -0.491       |
|               | C58                 | -10.221      | -1.508       | 0.557        |
|               | C59                 | -10.577      | -0.597       | -1.760       |
|               | C60                 | -11.858      | 0.182        | -1.704       |

|      |         |        |        |
|------|---------|--------|--------|
| C61  | -12.937 | 0.081  | -0.846 |
| C62  | -13.294 | 1.669  | -2.350 |
| C63  | 3.828   | -0.014 | 9.111  |
| C64  | 5.307   | -0.353 | 9.137  |
| C65  | 3.321   | -0.354 | 7.686  |
| C66  | 1.843   | -0.103 | 7.506  |
| C67  | 0.889   | -1.088 | 7.826  |
| C68  | 1.376   | 1.125  | 7.004  |
| C69  | -0.479  | -0.863 | 7.640  |
| C70  | 0.014   | 1.367  | 6.826  |
| C71  | -0.914  | 0.370  | 7.140  |
| C72  | -0.868  | 6.438  | 6.474  |
| C73  | -2.172  | 7.059  | 5.955  |
| C74  | -0.495  | 5.210  | 5.629  |
| C75  | -3.201  | 8.951  | 4.772  |
| C76  | -3.763  | 8.354  | 3.481  |
| C77  | -3.405  | 6.796  | 1.604  |
| C78  | -4.157  | 5.486  | 1.921  |
| C79  | -2.197  | 6.582  | 0.673  |
| C80  | -2.461  | 5.924  | -0.686 |
| C81  | -3.197  | 6.772  | -1.743 |
| C82  | -5.616  | 7.393  | -1.540 |
| C83  | -4.426  | 3.528  | 3.355  |
| C84  | -5.658  | 3.773  | 4.250  |
| C85  | -3.526  | 2.497  | 4.048  |
| C86  | -6.511  | 4.986  | 6.195  |
| C87  | -7.814  | 5.772  | 6.053  |
| C88  | -9.262  | 7.118  | 4.580  |
| C89  | -10.576 | 6.409  | 4.186  |
| C90  | -8.911  | 8.216  | 3.546  |
| C91  | -8.554  | 7.611  | 2.194  |
| C92  | -11.615 | 4.323  | 3.401  |
| C93  | -12.639 | 4.052  | 4.500  |
| C94  | -11.134 | 2.984  | 2.781  |
| C95  | -10.252 | 3.191  | 1.571  |
| C96  | -10.816 | 3.348  | 0.296  |
| C97  | -8.855  | 3.280  | 1.692  |
| C98  | -10.021 | 3.614  | -0.822 |
| C99  | -8.045  | 3.568  | 0.590  |
| C100 | -8.641  | 3.739  | -0.657 |
| C101 | 8.214   | 5.700  | -3.658 |
| C102 | 6.972   | 5.108  | -4.306 |
| C103 | 4.564   | 4.603  | -3.970 |
| C104 | 3.478   | 5.679  | -4.076 |
| C105 | 2.071   | 7.228  | -2.797 |
| C106 | 2.191   | 8.200  | -1.626 |
| C107 | 3.035   | 8.742  | 0.587  |
| C108 | 3.771   | 10.045 | 0.355  |
| C109 | 3.524   | 4.347  | -8.473 |
| C110 | 2.000   | 4.490  | -8.575 |
| C111 | 3.875   | 3.063  | -7.685 |
| C112 | 5.348   | 2.666  | -7.897 |
| C113 | 5.764   | 1.599  | -6.910 |
| C114 | -0.069  | 5.257  | -7.511 |
| C115 | -0.441  | 6.640  | -7.013 |
| C116 | -0.820  | 4.095  | -6.814 |
| C117 | -0.208  | 3.705  | -5.491 |
| C118 | -0.489  | 4.425  | -4.316 |
| C119 | 0.733   | 2.661  | -5.427 |
| C120 | 0.181   | 4.126  | -3.125 |
| C121 | 1.404   | 2.364  | -4.235 |
| C122 | 1.137   | 3.104  | -3.080 |
| C123 | 10.877  | 2.076  | 0.430  |
| C124 | 11.416  | 1.588  | 1.785  |
| C125 | 10.143  | 0.962  | -0.335 |
| C126 | 9.424   | 1.384  | -1.580 |
| C127 | 9.985   | 1.873  | -2.744 |
| C128 | 7.811   | 1.567  | -3.040 |
| C129 | 12.611  | -0.092 | 3.075  |
| C130 | 13.501  | 0.923  | 3.756  |
| C131 | 5.366   | -3.966 | -2.559 |
| C132 | 5.984   | -3.512 | -1.268 |
| C133 | 7.084   | -2.391 | -1.471 |

|       |        |         |        |
|-------|--------|---------|--------|
| C134  | 8.168  | -2.913  | -2.460 |
| C135  | 9.376  | -1.970  | -2.585 |
| C136  | 10.546 | -2.571  | -3.316 |
| C137  | 7.778  | -2.224  | -0.083 |
| C138  | 3.506  | 2.219   | 1.093  |
| Fe139 | 5.013  | 2.762   | -0.130 |
| Fe140 | 1.508  | 2.151   | 1.028  |
| Fe141 | 3.263  | 2.475   | 3.101  |
| Fe142 | 3.258  | 4.203   | 1.108  |
| Fe143 | 1.197  | 4.237   | 2.771  |
| Fe144 | 4.971  | 1.049   | 1.836  |
| Fe145 | 3.485  | 0.795   | -0.178 |
| H146  | 0.996  | -5.979  | -7.469 |
| H147  | 0.664  | -4.456  | -7.953 |
| H148  | -3.321 | -5.767  | -8.544 |
| H149  | -1.176 | -5.172  | -9.291 |
| H150  | -0.758 | -6.844  | -8.935 |
| H151  | -3.881 | -4.894  | -5.921 |
| H152  | -3.360 | -8.255  | -7.016 |
| H153  | -5.006 | -5.775  | -6.988 |
| H154  | -3.311 | -10.223 | -5.782 |
| H155  | -1.299 | -7.970  | -5.383 |
| H156  | -4.406 | -9.483  | -4.590 |
| H157  | -0.952 | -4.812  | -1.313 |
| H158  | -1.478 | -6.016  | -3.885 |
| H159  | 0.683  | -7.842  | -4.166 |
| H160  | -5.142 | -6.562  | 0.076  |
| H161  | -3.740 | -6.852  | -2.439 |
| H162  | 0.147  | -9.160  | -3.095 |
| H163  | -2.261 | -4.385  | -2.446 |
| H164  | -2.988 | -9.213  | -1.170 |
| H165  | -5.427 | -7.801  | -1.175 |
| H166  | 1.393  | -5.327  | 0.433  |
| H167  | 1.228  | -3.582  | 0.120  |
| H168  | 2.141  | -4.143  | 1.535  |
| H169  | -0.883 | -4.488  | 1.081  |
| H170  | -2.443 | -11.193 | -0.121 |
| H171  | -3.755 | -3.408  | 2.168  |
| H172  | -3.857 | -7.705  | 3.366  |
| H173  | -6.304 | -5.765  | 4.804  |
| H174  | -0.248 | -2.147  | 1.605  |
| H175  | 0.602  | -2.668  | 3.070  |
| H176  | 3.318  | -0.688  | 9.826  |
| H177  | -5.499 | -3.111  | 2.291  |
| H178  | -6.942 | -4.423  | 3.825  |
| H179  | -4.427 | -2.655  | 3.639  |
| H180  | -5.923 | -4.084  | 5.245  |
| H181  | -5.006 | -5.522  | 2.684  |
| H182  | -3.328 | -4.478  | 5.028  |
| H183  | -2.594 | -5.472  | 2.376  |
| H184  | -1.166 | -2.853  | 2.948  |
| H185  | -2.599 | 2.382   | 3.463  |
| H186  | -4.071 | 1.538   | 4.038  |
| H187  | -2.879 | 2.138   | 5.860  |
| H188  | -2.790 | -0.130  | 7.140  |
| H189  | -0.326 | 2.315   | 6.407  |
| H190  | 2.092  | 1.894   | 6.709  |
| H191  | 1.218  | -2.053  | 8.221  |
| H192  | -0.819 | -6.995  | 1.571  |
| H193  | 1.550  | -9.093  | 0.900  |
| H194  | 0.883  | -9.812  | 2.380  |
| H195  | -0.677 | -8.797  | 0.068  |
| H196  | -3.462 | -10.749 | 1.269  |
| H197  | -1.203 | -1.648  | 7.876  |
| H198  | 0.908  | -5.389  | 3.387  |
| H199  | -5.175 | -8.953  | 5.492  |
| H200  | -4.054 | -9.751  | 4.357  |
| H201  | -2.169 | -8.737  | 6.087  |
| H202  | 10.943 | -4.250  | 7.349  |
| H203  | 4.343  | -0.721  | -5.737 |
| H204  | 6.547  | -5.491  | -2.502 |
| H205  | 5.472  | 2.262   | -8.912 |
| H206  | 5.998  | 3.548   | -7.793 |

|      |         |        |        |
|------|---------|--------|--------|
| H207 | 3.233   | 2.229  | -8.007 |
| H208 | 0.304   | 7.432  | -7.263 |
| H209 | 3.839   | 4.192  | -9.517 |
| H210 | 0.051   | -0.309 | -4.572 |
| H211 | 1.255   | -3.002 | -5.414 |
| H212 | 1.918   | 5.406  | -6.715 |
| H213 | -0.380  | 5.257  | -8.576 |
| H214 | 4.034   | 5.714  | -6.997 |
| H215 | 3.910   | -1.815 | -4.424 |
| H216 | 3.661   | 3.232  | -6.619 |
| H217 | 5.161   | 5.551  | -8.186 |
| H218 | -0.983  | -1.485 | -7.880 |
| H219 | -0.481  | -1.794 | -3.770 |
| H220 | 6.553   | 3.016  | -5.788 |
| H221 | 1.759   | -2.277 | -3.893 |
| H222 | -5.277  | -1.532 | 0.091  |
| H223 | -2.683  | -1.172 | -0.722 |
| H224 | -6.916  | -4.384 | -3.265 |
| H225 | -4.936  | -2.567 | -4.570 |
| H226 | -8.156  | -1.207 | -1.833 |
| H227 | -13.136 | -0.552 | 0.012  |
| H228 | -9.897  | -2.566 | 0.400  |
| H229 | -10.762 | -1.655 | -2.017 |
| H230 | -9.687  | 0.476  | -0.066 |
| H231 | -13.806 | 2.466  | -2.881 |
| H232 | -5.551  | 0.966  | 0.095  |
| H233 | -6.020  | 0.931  | -1.606 |
| H234 | -14.742 | 1.229  | -0.852 |
| H235 | -9.993  | -0.171 | -2.591 |
| H236 | -5.888  | -1.289 | -2.785 |
| H237 | -5.165  | -4.621 | -3.207 |
| H238 | -7.526  | -1.379 | -6.620 |
| H239 | -1.591  | 2.571  | -2.404 |
| H240 | -6.511  | -2.613 | -7.391 |
| H241 | 3.785   | 1.578  | 10.400 |
| H242 | 2.695   | 1.688  | 9.187  |
| H243 | -2.796  | 4.957  | 3.393  |
| H244 | -4.811  | 3.068  | 2.433  |
| H245 | -4.759  | 5.413  | 5.095  |
| H246 | -4.172  | 2.611  | -2.014 |
| H247 | -5.291  | 3.576  | -3.467 |
| H248 | -6.236  | 3.708  | -2.190 |
| H249 | -3.216  | 2.570  | -5.412 |
| H250 | -4.282  | 2.137  | -6.782 |
| H251 | -8.083  | 8.817  | 3.948  |
| H252 | -9.792  | 8.858  | 3.424  |
| H253 | -6.484  | 7.802  | 2.545  |
| H254 | -6.954  | 6.849  | 1.169  |
| H255 | -6.135  | 9.337  | -1.168 |
| H256 | -2.794  | 6.554  | -2.743 |
| H257 | -10.477 | 3.717  | -1.810 |
| H258 | -8.370  | 3.119  | 2.658  |
| H259 | -7.118  | 5.969  | -1.493 |
| H260 | -1.449  | 5.967  | 1.199  |
| H261 | -2.073  | 7.195  | 3.228  |
| H262 | -2.981  | 4.962  | -0.557 |
| H263 | -4.589  | -1.379 | -6.855 |
| H264 | -2.926  | 9.996  | 4.571  |
| H265 | -2.304  | 0.309  | -6.543 |
| H266 | -1.732  | 7.568  | 0.512  |
| H267 | -6.968  | 3.692  | 0.715  |
| H268 | -5.962  | 2.082  | -4.945 |
| H269 | -4.027  | 8.954  | 5.496  |
| H270 | -4.522  | 9.122  | -1.733 |
| H271 | -7.653  | 7.619  | -1.468 |
| H272 | 0.257   | -0.713 | -7.070 |
| H273 | -1.134  | -2.758 | -5.973 |
| H274 | -11.898 | 3.263  | 0.166  |
| H275 | -3.977  | 0.557  | -4.165 |
| H276 | -4.152  | 7.438  | 1.117  |
| H277 | -3.008  | 7.838  | -1.561 |
| H278 | -1.471  | 5.683  | -1.098 |
| H279 | -4.919  | 5.552  | -2.034 |

|      |        |         |        |
|------|--------|---------|--------|
| H280 | -6.791 | 3.974   | 6.525  |
| H281 | -7.434 | 6.112   | 4.065  |
| H282 | -9.478 | 7.608   | 5.541  |
| H283 | -5.949 | 5.463   | 7.009  |
| H284 | -9.573 | 4.642   | 3.994  |
| H285 | 7.924  | 6.522   | -2.987 |
| H286 | 8.630  | 4.895   | -3.016 |
| H287 | 10.159 | 2.872   | 0.673  |
| H288 | 10.052 | 6.358   | -4.240 |
| H289 | 9.283  | 5.458   | -5.372 |
| H290 | 0.471  | 4.827   | 5.982  |
| H291 | -1.822 | 5.451   | 7.981  |
| H292 | -1.127 | 8.663   | 5.207  |
| H293 | -1.267 | 4.440   | 5.765  |
| H294 | -1.136 | 6.853   | 8.467  |
| H295 | 3.559  | 8.197   | 1.388  |
| H296 | -0.057 | 7.179   | 6.400  |
| H297 | 6.576  | -6.264  | 3.848  |
| H298 | 9.167  | -4.700  | 3.342  |
| H299 | 3.508  | 6.992   | -0.536 |
| H300 | 1.945  | -1.084  | 5.207  |
| H301 | 2.117  | 7.821   | -3.719 |
| H302 | 2.150  | 1.567   | -4.211 |
| H303 | 1.051  | 6.809   | -2.748 |
| H304 | 4.433  | -4.722  | 3.822  |
| H305 | 3.407  | 5.686   | -2.038 |
| H306 | 5.100  | -3.848  | 2.439  |
| H307 | 7.002  | -5.356  | 2.381  |
| H308 | 7.111  | -3.224  | 3.804  |
| H309 | 6.473  | -4.156  | 5.173  |
| H310 | -0.806 | 3.235   | -7.499 |
| H311 | 8.658  | -7.657  | 3.337  |
| H312 | 10.312 | -8.282  | 0.795  |
| H313 | 1.672  | 2.903   | -2.149 |
| H314 | 10.171 | -9.716  | 3.324  |
| H315 | 9.508  | -10.084 | 1.871  |
| H316 | 4.914  | -1.766  | 3.660  |
| H317 | -0.014 | 4.697   | -2.215 |
| H318 | 0.954  | 2.076   | -6.322 |
| H319 | 12.249 | -2.698  | 0.548  |
| H320 | 10.878 | 0.185   | -0.613 |
| H321 | 9.944  | -3.061  | 1.249  |
| H322 | 12.588 | -2.458  | -0.939 |
| H323 | 4.432  | 10.063  | -0.545 |
| H324 | 7.795  | -1.002  | 2.271  |
| H325 | 6.431  | -4.354  | -0.720 |
| H326 | 5.901  | 5.494   | -2.598 |
| H327 | 8.515  | -3.891  | -2.091 |
| H328 | 9.029  | 2.287   | -4.616 |
| H329 | 6.849  | 1.531   | -3.536 |
| H330 | 11.596 | -8.435  | 1.996  |
| H331 | 3.216  | -0.463  | 4.196  |
| H332 | 9.315  | -1.729  | 4.025  |
| H333 | 7.303  | -0.151  | 3.475  |
| H334 | 9.732  | -3.741  | 5.236  |
| H335 | 3.118  | -4.374  | 5.361  |
| H336 | 11.063 | -3.316  | -4.976 |
| H337 | 9.065  | -1.055  | -3.112 |
| H338 | 9.747  | -1.679  | -1.597 |
| H339 | 7.712  | -3.060  | -3.450 |
| H340 | 4.275  | 3.826   | -3.243 |
| H341 | -1.216 | 5.241   | -4.349 |
| H342 | -1.866 | 4.415   | -6.689 |
| H343 | 5.200  | -3.052  | -0.650 |
| H344 | 10.455 | -2.552  | 3.370  |
| H345 | 10.894 | -4.146  | 1.842  |
| H346 | 1.692  | -3.417  | 5.486  |
| H347 | 11.007 | 2.139   | -2.989 |
| H348 | 9.417  | 0.483   | 0.335  |
| H349 | 4.687  | 4.146   | -4.954 |
| H350 | 2.020  | 8.964   | 0.950  |
| H351 | 3.552  | -1.415  | 7.503  |
| H352 | 3.891  | 0.245   | 6.957  |

|       |         |        |        |
|-------|---------|--------|--------|
| H353  | 12.357  | 3.468  | 0.139  |
| H354  | 12.711  | 2.009  | -0.511 |
| H355  | 13.231  | -0.975 | 2.857  |
| H356  | 12.152  | -0.207 | 0.997  |
| H357  | 14.001  | 1.649  | 3.072  |
| H358  | 11.813  | -0.410 | 3.765  |
| H359  | 5.966   | 0.455  | 8.735  |
| H360  | -12.256 | 4.156  | 5.543  |
| H361  | 9.768   | -5.563 | 7.631  |
| H362  | 7.997   | -3.439 | 7.674  |
| H363  | -12.124 | 4.916  | 2.625  |
| H364  | -10.605 | 2.398  | 3.550  |
| H365  | -12.034 | 2.416  | 2.504  |
| H366  | -8.365  | 4.101  | -2.551 |
| H367  | 0.994   | -0.627 | 0.346  |
| H368  | -0.744  | 0.348  | -1.485 |
| Mo369 | 6.135   | 0.323  | -0.499 |
| N370  | 0.627   | -5.433 | -8.253 |
| N371  | -3.015  | -5.879 | -7.580 |
| N372  | -3.596  | -8.177 | -6.030 |
| N373  | -1.252  | -8.519 | -4.525 |
| N374  | -1.288  | -6.166 | -2.894 |
| N375  | -3.682  | -6.700 | -1.430 |
| N376  | -3.184  | -9.250 | -0.166 |
| N377  | -0.543  | -9.225 | 0.989  |
| N378  | -0.050  | -6.757 | 2.195  |
| N379  | -2.426  | -5.380 | 3.381  |
| N380  | -3.861  | -7.690 | 4.389  |
| N381  | 9.683   | -9.315 | 2.520  |
| N382  | 9.106   | -6.759 | 3.126  |
| N383  | 4.488   | -2.628 | 4.016  |
| N384  | 2.606   | -3.549 | 5.064  |
| N385  | 2.664   | -1.288 | 4.516  |
| N386  | 9.506   | -4.569 | 5.830  |
| N387  | -0.757  | -0.928 | -7.053 |
| N388  | 3.629   | -1.252 | -5.229 |
| N389  | -2.939  | -0.097 | -5.838 |
| N390  | -5.454  | -1.131 | -6.379 |
| N391  | -5.844  | -3.012 | -4.388 |
| N392  | -5.897  | -1.768 | -1.886 |
| N393  | -3.532  | 1.799  | -1.806 |
| N394  | -1.762  | 0.572  | -1.601 |
| N395  | -8.335  | -0.923 | -0.873 |
| N396  | -12.096 | 1.177  | -2.640 |
| N397  | -13.835 | 1.037  | -1.270 |
| N398  | 3.657   | 1.412  | 9.399  |
| N399  | -0.980  | 6.027  | 7.882  |
| N400  | -2.054  | 8.266  | 5.334  |
| N401  | -2.964  | 7.500  | 2.805  |
| N402  | -4.642  | 6.522  | -1.802 |
| N403  | -5.361  | 8.704  | -1.347 |
| N404  | -6.885  | 6.959  | -1.393 |
| N405  | -3.720  | 4.751  | 2.979  |
| N406  | -5.639  | 4.891  | 5.032  |
| N407  | -8.132  | 6.221  | 4.804  |
| N408  | -7.232  | 7.333  | 2.022  |
| N409  | -10.485 | 5.085  | 3.911  |
| N410  | 9.142   | 6.197  | -4.677 |
| N411  | 5.844   | 5.173  | -3.570 |
| N412  | 3.059   | 6.168  | -2.890 |
| N413  | 3.003   | 7.887  | -0.587 |
| N414  | 4.155   | 5.589  | -8.010 |
| N415  | 1.377   | 5.114  | -7.535 |
| N416  | 11.951  | 2.685  | -0.381 |
| N417  | 8.055   | 1.205  | -1.785 |
| N418  | 8.952   | 1.980  | -3.650 |
| N419  | 12.086  | 0.402  | 1.813  |
| N420  | -1.876  | 2.303  | 1.070  |
| N421  | -0.792  | 2.039  | 1.030  |
| O422  | -1.262  | -5.865 | -6.129 |
| O423  | -4.298  | -6.807 | -4.349 |
| O424  | -2.425  | -9.795 | -3.035 |
| O425  | -0.234  | -7.417 | -1.313 |

|                        |                      |              |              |              |
|------------------------|----------------------|--------------|--------------|--------------|
|                        | O426                 | -2.755       | -5.533       | 0.289        |
|                        | O427                 | -4.422       | -8.449       | 1.578        |
|                        | O428                 | -1.265       | -10.814      | 2.481        |
|                        | O429                 | 1.946        | -7.502       | 3.057        |
|                        | O430                 | -0.890       | -5.105       | 5.050        |
|                        | O431                 | -3.968       | -6.503       | 6.322        |
|                        | O432                 | -3.434       | -9.936       | 7.151        |
|                        | O433                 | 10.963       | -5.926       | 2.027        |
|                        | O434                 | 8.575        | -6.670       | 5.915        |
|                        | O435                 | 9.391        | -3.150       | 9.135        |
|                        | O436                 | -3.070       | -1.900       | -4.426       |
|                        | O437                 | 2.013        | -0.478       | -6.629       |
|                        | O438                 | -6.433       | 0.297        | -4.888       |
|                        | O439                 | -5.229       | 2.745        | -5.020       |
|                        | O440                 | -7.945       | -3.498       | -5.184       |
|                        | O441                 | -5.913       | -3.785       | -0.813       |
|                        | O442                 | -7.418       | -0.573       | 1.190        |
|                        | O443                 | -10.973      | -1.196       | 1.464        |
|                        | O444                 | 5.767        | -1.413       | 9.533        |
|                        | O445                 | -2.249       | 0.651        | 6.922        |
|                        | O446                 | -3.274       | 6.499        | 6.098        |
|                        | O447                 | -4.903       | 8.695        | 3.103        |
|                        | O448                 | -5.130       | 5.156        | 1.220        |
|                        | O449                 | -6.584       | 2.949        | 4.269        |
|                        | O450                 | -3.245       | 2.914        | 5.386        |
|                        | O451                 | -8.531       | 5.955        | 7.044        |
|                        | O452                 | -11.641      | 7.041        | 4.137        |
|                        | O453                 | -9.420       | 7.301        | 1.361        |
|                        | O454                 | -13.790      | 3.722        | 4.267        |
|                        | O455                 | -7.811       | 4.069        | -1.747       |
|                        | O456                 | 7.037        | 4.570        | -5.440       |
|                        | O457                 | 3.045        | 6.071        | -5.183       |
|                        | O458                 | 1.511        | 9.241        | -1.643       |
|                        | O459                 | 3.691        | 11.004       | 1.107        |
|                        | O460                 | 1.373        | 4.037        | -9.547       |
|                        | O461                 | 5.504        | 0.407        | -7.052       |
|                        | O462                 | 6.410        | 2.019        | -5.806       |
|                        | O463                 | -1.478       | 6.912        | -6.425       |
|                        | O464                 | 11.319       | 2.286        | 2.811        |
|                        | O465                 | 13.732       | 0.918        | 4.958        |
|                        | O466                 | 4.484        | -3.385       | -3.175       |
|                        | O467                 | 5.863        | -5.127       | -3.097       |
|                        | O468                 | 11.676       | -2.720       | -2.859       |
|                        | O469                 | 10.241       | -2.945       | -4.587       |
|                        | O470                 | 7.638        | -1.064       | 0.466        |
|                        | O471                 | 8.442        | -3.169       | 0.404        |
|                        | O472                 | 6.498        | -1.214       | -1.895       |
|                        | O473                 | 10.110       | -2.271       | 4.259        |
|                        | O474                 | 7.802        | -0.964       | 3.263        |
|                        | O475                 | -5.304       | 3.823        | -2.502       |
|                        | O476                 | 12.972       | -2.368       | -0.043       |
|                        | O477                 | 10.829       | -3.166       | 1.702        |
|                        | S478                 | -0.377       | 5.573        | 3.817        |
|                        | S479                 | 1.078        | 4.381        | 0.538        |
|                        | S480                 | 4.607        | 1.495        | -1.951       |
|                        | S481                 | 1.056        | 1.978        | 3.298        |
|                        | S482                 | 1.336        | 0.331        | -0.568       |
|                        | S483                 | 4.788        | 4.979        | -0.336       |
|                        | S484                 | 4.506        | -0.885       | 0.810        |
|                        | S485                 | 3.385        | 4.769        | 3.257        |
|                        | S486                 | 6.808        | 2.024        | 1.025        |
|                        | S487                 | 4.794        | 1.128        | 4.033        |
| B 47(1)<br>dissociated | bm22b2n2xd47te.car_3 |              |              |              |
|                        | C1                   | -1.675256508 | -5.811635529 | -7.284981272 |
|                        | C2                   | -0.745394043 | -5.792864676 | -8.503609565 |
|                        | C3                   | -4.009647105 | -5.793153206 | -6.509294047 |
|                        | C4                   | -3.974659300 | -6.967796081 | -5.533271754 |
|                        | C5                   | -3.481554423 | -9.332957540 | -5.173939481 |
|                        | C6                   | -2.350929167 | -9.231252579 | -4.144090672 |
|                        | C7                   | -0.170942716 | -8.258270063 | -3.595855651 |
|                        | C8                   | -0.551740400 | -7.256484026 | -2.503397869 |
|                        | C9                   | -1.765454137 | -5.226476813 | -1.912899522 |

|     |               |               |              |
|-----|---------------|---------------|--------------|
| C10 | -2.757526856  | -5.842452022  | -0.915436905 |
| C11 | -4.649668080  | -7.320562878  | -0.550796499 |
| C12 | -4.057087970  | -8.378120245  | 0.390399524  |
| C13 | -2.674074175  | -10.384028466 | 0.594605922  |
| C14 | -1.426933540  | -10.139682856 | 1.454198388  |
| C15 | 0.733418850   | -8.982793036  | 1.648856873  |
| C16 | 0.919506686   | -7.648555481  | 2.375225593  |
| C17 | -0.019563435  | -5.396488624  | 2.802674947  |
| C18 | -1.145461592  | -5.241919506  | 3.841399566  |
| C19 | 0.002178896   | -4.264398289  | 1.739161911  |
| C20 | -0.151545824  | -2.880385418  | 2.377271480  |
| C21 | 1.279536880   | -4.344921702  | 0.896684715  |
| C22 | -3.574599854  | -5.216077386  | 4.260652657  |
| C23 | -3.805173509  | -6.506795490  | 5.071910625  |
| C24 | -4.829580683  | -4.776512972  | 3.470860836  |
| C25 | -6.075833611  | -4.771430602  | 4.364088607  |
| C26 | -4.620853801  | -3.394297100  | 2.840116184  |
| C27 | -4.111128742  | -8.914597539  | 5.063394259  |
| C28 | -3.153205043  | -9.173701471  | 6.208747796  |
| C29 | 10.510692059  | -8.284740987  | 1.895152860  |
| C30 | 10.222048946  | -6.863711594  | 2.384002131  |
| C31 | 8.618764782   | -5.541862748  | 3.776311373  |
| C32 | 8.895118816   | -5.645726478  | 5.290238077  |
| C33 | 7.120110626   | -5.373267646  | 3.475189285  |
| C34 | 6.497351269   | -4.109452176  | 4.075038820  |
| C35 | 5.098865094   | -3.876084478  | 3.497680190  |
| C36 | 3.260954718   | -2.508473493  | 4.505416363  |
| C37 | 9.888021998   | -4.546387180  | 7.237928270  |
| C38 | 9.020088235   | -3.641461598  | 8.085611610  |
| C39 | -1.056444465  | -1.649697999  | -5.805368790 |
| C40 | -2.441106128  | -1.243349053  | -5.273392395 |
| C41 | -0.023588680  | -1.387500100  | -4.687570291 |
| C42 | 1.365047305   | -2.024463349  | -4.887068165 |
| C43 | 2.370103748   | -1.178056776  | -5.667024170 |
| C44 | -4.079642915  | 0.580910879   | -5.260149942 |
| C45 | -5.424319929  | -0.100719459  | -5.520259764 |
| C46 | -4.143681183  | 2.061510786   | -5.689393135 |
| C47 | -6.617305406  | -1.996002269  | -6.489598571 |
| C48 | -6.871913104  | -2.896853644  | -5.271610624 |
| C49 | -5.953831434  | -3.860734860  | -3.201837897 |
| C50 | -5.890418899  | -3.145118196  | -1.854542503 |
| C51 | -5.859628097  | -0.999948327  | -0.648890955 |
| C52 | -7.250829566  | -0.832307900  | 0.005315752  |
| C53 | -5.336631649  | 0.425564150   | -0.875837504 |
| C54 | -3.909885251  | 0.568086273   | -1.294473065 |
| C55 | -2.787179601  | -0.214783416  | -1.161905917 |
| C56 | -2.152791308  | 1.716527181   | -2.059192908 |
| C57 | -9.651689088  | -0.519427548  | -0.465642260 |
| C58 | -10.182885747 | -1.465242853  | 0.605139795  |
| C59 | -10.544420307 | -0.591784361  | -1.733064355 |
| C60 | -11.828860724 | 0.180590977   | -1.675439113 |
| C61 | -12.903554560 | 0.072688927   | -0.812711555 |
| C62 | -13.276967780 | 1.656837035   | -2.315521660 |
| C63 | 3.842651757   | -0.003604286  | 9.110262906  |
| C64 | 5.321690099   | -0.340177327  | 9.128105257  |
| C65 | 3.335527670   | -0.341383124  | 7.682546395  |
| C66 | 1.855548720   | -0.097028298  | 7.503122257  |
| C67 | 0.906540936   | -1.086172154  | 7.825112046  |
| C68 | 1.383015007   | 1.127307561   | 6.998827580  |
| C69 | -0.463294507  | -0.866271867  | 7.643618115  |
| C70 | 0.019643769   | 1.364431735   | 6.822979034  |
| C71 | -0.904087610  | 0.365188694   | 7.145283814  |
| C72 | -0.852576875  | 6.409066589   | 6.431394873  |
| C73 | -2.162688958  | 7.035259935   | 5.933698843  |
| C74 | -0.520287294  | 5.157508244   | 5.604606110  |
| C75 | -3.203668151  | 8.937658770   | 4.774588335  |
| C76 | -3.770351266  | 8.354913392   | 3.479077257  |
| C77 | -3.421479987  | 6.786545676   | 1.606034247  |
| C78 | -4.170401087  | 5.476662029   | 1.937283520  |
| C79 | -2.213827945  | 6.575430574   | 0.671646489  |
| C80 | -2.464865522  | 5.919253735   | -0.689891007 |
| C81 | -3.193316224  | 6.760730049   | -1.754083954 |
| C82 | -5.609974163  | 7.378486081   | -1.518853077 |



|       |               |               |              |
|-------|---------------|---------------|--------------|
| C83   | -4.443631877  | 3.538366456   | 3.395835323  |
| C84   | -5.679809892  | 3.783582601   | 4.284428771  |
| C85   | -3.541657589  | 2.520186304   | 4.107963567  |
| C86   | -6.526624517  | 5.005437207   | 6.226618079  |
| C87   | -7.819395880  | 5.804152549   | 6.076100584  |
| C88   | -9.261933266  | 7.126644523   | 4.574812793  |
| C89   | -10.565165387 | 6.400444078   | 4.173907260  |
| C90   | -8.910774051  | 8.217678340   | 3.533286955  |
| C91   | -8.546697064  | 7.606158620   | 2.184618879  |
| C92   | -11.587226361 | 4.313583186   | 3.374849194  |
| C93   | -12.615965673 | 4.052283841   | 4.470297778  |
| C94   | -11.097652284 | 2.973740764   | 2.762913482  |
| C95   | -10.211412111 | 3.180638626   | 1.554493822  |
| C96   | -10.779463065 | 3.354868136   | 0.283487802  |
| C97   | -8.813304709  | 3.253048750   | 1.670237267  |
| C98   | -9.987347055  | 3.624646897   | -0.835853341 |
| C99   | -8.005683671  | 3.545561654   | 0.566752626  |
| C100  | -8.605365628  | 3.733168005   | -0.676124561 |
| C101  | 8.229590389   | 5.711171783   | -3.685729529 |
| C102  | 6.981204036   | 5.115318752   | -4.313999050 |
| C103  | 4.579454597   | 4.610596177   | -3.956082259 |
| C104  | 3.493284756   | 5.687382726   | -4.063520054 |
| C105  | 2.086090914   | 7.233213097   | -2.778929337 |
| C106  | 2.233487989   | 8.224362974   | -1.626891878 |
| C107  | 3.067154583   | 8.765612531   | 0.587233690  |
| C108  | 3.713880579   | 10.104335430  | 0.297171944  |
| C109  | 3.528331555   | 4.364286616   | -8.473117925 |
| C110  | 2.003023568   | 4.503118985   | -8.568356436 |
| C111  | 3.883058955   | 3.079845889   | -7.688725611 |
| C112  | 5.358487894   | 2.689296976   | -7.898426257 |
| C113  | 5.773403304   | 1.613436610   | -6.919414721 |
| C114  | -0.066044877  | 5.263788260   | -7.501587834 |
| C115  | -0.443669064  | 6.643934687   | -7.001721970 |
| C116  | -0.812222839  | 4.097136253   | -6.810385460 |
| C117  | -0.195795426  | 3.697152171   | -5.492180867 |
| C118  | -0.463139688  | 4.416953886   | -4.313558878 |
| C119  | 0.734659905   | 2.643883493   | -5.437215203 |
| C120  | 0.206076987   | 4.102999157   | -3.125382345 |
| C121  | 1.406143111   | 2.333737264   | -4.248545383 |
| C122  | 1.149680128   | 3.069518082   | -3.088609149 |
| C123  | 10.856616455  | 2.047964392   | 0.434323712  |
| C124  | 11.406113544  | 1.562959145   | 1.786115314  |
| C125  | 10.079032916  | 0.942648851   | -0.299706562 |
| C126  | 9.361989898   | 1.365532077   | -1.546251213 |
| C127  | 9.915682003   | 1.856443419   | -2.713148153 |
| C128  | 7.743540367   | 1.537604019   | -3.003053029 |
| C129  | 12.641705673  | -0.101935551  | 3.060432228  |
| C130  | 13.499144626  | 0.930074909   | 3.759816031  |
| C131  | 5.287760831   | -3.947893011  | -2.536525239 |
| C132  | 5.918560184   | -3.513804017  | -1.244690464 |
| C133  | 7.02092843    | -2.395518932  | -1.448051378 |
| C134  | 8.088868123   | -2.895792117  | -2.461224378 |
| C135  | 9.303419929   | -1.957829672  | -2.560511214 |
| C136  | 10.477557325  | -2.547269448  | -3.291726060 |
| C137  | 7.733602681   | -2.241591855  | -0.067305690 |
| C138  | 3.542348889   | 2.242534852   | 1.094430001  |
| Fe139 | 5.022060648   | 2.786219324   | -0.111734055 |
| Fe140 | 1.629654285   | 2.136564867   | 0.995664790  |
| Fe141 | 3.146509481   | 2.438135851   | 3.083965085  |
| Fe142 | 3.184865029   | 4.209596278   | 1.110957390  |
| Fe143 | 1.056120277   | 4.135685650   | 2.695993794  |
| Fe144 | 4.955248222   | 1.049351969   | 1.877059292  |
| Fe145 | 3.501675588   | 0.791487347   | -0.161260878 |
| H146  | 1.001124260   | -5.989135002  | -7.470888754 |
| H147  | 0.692907622   | -4.454360602  | -7.936937439 |
| H148  | -3.312908042  | -5.747724222  | -8.530583375 |
| H149  | -1.167802082  | -5.123054804  | -9.269192971 |
| H150  | -0.774685649  | -6.806600547  | -8.940705101 |
| H151  | -3.887356108  | -4.883994767  | -5.903575276 |
| H152  | -3.363277249  | -8.238500225  | -7.023566511 |
| H153  | -5.000801894  | -5.765779868  | -6.982215349 |
| H154  | -3.307662166  | -10.214192488 | -5.804302014 |
| H155  | -1.290854218  | -7.991591207  | -5.392192389 |

|      |               |               |              |
|------|---------------|---------------|--------------|
| H156 | -4.412220848  | -9.489429300  | -4.613184451 |
| H157 | -0.932832896  | -4.823382380  | -1.321529400 |
| H158 | -1.466038481  | -6.025834097  | -3.891945349 |
| H159 | 0.685528641   | -7.873957459  | -4.165455704 |
| H160 | -5.133861483  | -6.561279999  | 0.077096743  |
| H161 | -3.738918920  | -6.842545908  | -2.439729632 |
| H162 | 0.133253616   | -9.184021524  | -3.093388763 |
| H163 | -2.248003778  | -4.395497931  | -2.447828082 |
| H164 | -2.984265664  | -9.217763571  | -1.170119800 |
| H165 | -5.417654513  | -7.800007183  | -1.174544759 |
| H166 | 1.394239944   | -5.331742182  | 0.424093048  |
| H167 | 1.263091729   | -3.585862952  | 0.100224143  |
| H168 | 2.170811845   | -4.155002059  | 1.514540706  |
| H169 | -0.862268162  | -4.433491565  | 1.077202813  |
| H170 | -2.436812505  | -11.194230885 | -0.109958797 |
| H171 | -3.758194074  | -3.375096854  | 2.158143139  |
| H172 | -3.819248011  | -7.686343921  | 3.351463445  |
| H173 | -6.293147517  | -5.765121781  | 4.783237613  |
| H174 | -0.170452756  | -2.108540648  | 1.594016800  |
| H175 | 0.691015728   | -2.645139050  | 3.042432269  |
| H176 | 3.335076825   | -0.682765788  | 9.822494600  |
| H177 | -5.511533506  | -3.104830741  | 2.265150332  |
| H178 | -6.951975185  | -4.448156744  | 3.781676674  |
| H179 | -4.459870942  | -2.634666975  | 3.620299707  |
| H180 | -5.948592258  | -4.070019180  | 5.204677709  |
| H181 | -4.991406013  | -5.509646661  | 2.659639331  |
| H182 | -3.340659275  | -4.451723247  | 5.015598172  |
| H183 | -2.585092720  | -5.447602394  | 2.367380575  |
| H184 | -1.082579352  | -2.786975224  | 2.954868977  |
| H185 | -2.585780030  | 2.442084188   | 3.568844926  |
| H186 | -4.057026752  | 1.546521280   | 4.061531125  |
| H187 | -2.933535886  | 2.147349866   | 5.931459693  |
| H188 | -2.779770601  | -0.135355838  | 7.172889334  |
| H189 | -0.325931473  | 2.310534088   | 6.407317887  |
| H190 | 2.096201102   | 1.899242005   | 6.702184293  |
| H191 | 1.240077476   | -2.050043276  | 8.221088789  |
| H192 | -0.819452377  | -6.949327599  | 1.557301986  |
| H193 | 1.544487369   | -9.063677213  | 0.908428741  |
| H194 | 0.878394251   | -9.777973155  | 2.391819517  |
| H195 | -0.691255239  | -8.765856954  | 0.083840658  |
| H196 | -3.454312904  | -10.740667936 | 1.277967994  |
| H197 | -1.183585612  | -1.654180972  | 7.879941359  |
| H198 | 0.911454128   | -5.363632914  | 3.383885029  |
| H199 | -5.145037480  | -8.963746818  | 5.444332171  |
| H200 | -3.977467379  | -9.735518715  | 4.340118922  |
| H201 | -2.148174045  | -8.701513216  | 6.098063219  |
| H202 | 10.943729162  | -4.261330562  | 7.361916796  |
| H203 | 4.368318404   | -0.750875205  | -5.786151266 |
| H204 | 6.484181591   | -5.462446018  | -2.530179500 |
| H205 | 5.487870414   | 2.296039683   | -8.917205117 |
| H206 | 6.005266419   | 3.572074570   | -7.784088198 |
| H207 | 3.244811445   | 2.244425949   | -8.015769799 |
| H208 | 0.293251984   | 7.440173785   | -7.258067805 |
| H209 | 3.839052417   | 4.212044421   | -9.519363783 |
| H210 | 0.074693481   | -0.297846464  | -4.557684691 |
| H211 | 1.269038587   | -2.987677716  | -5.418321437 |
| H212 | 1.922018044   | 5.421228779   | -6.708146791 |
| H213 | -0.376261797  | 5.264037397   | -8.566281106 |
| H214 | 4.043572915   | 5.729198155   | -6.996307146 |
| H215 | 3.938333776   | -1.864406767  | -4.486186651 |
| H216 | 3.664293631   | 3.243390263   | -6.622195138 |
| H217 | 5.163454123   | 5.570701487   | -8.193541771 |
| H218 | -0.959920622  | -1.470962053  | -7.861043294 |
| H219 | -0.449327774  | -1.788160909  | -3.755560737 |
| H220 | 6.556394633   | 3.023781132   | -5.787618348 |
| H221 | 1.791539789   | -2.267778965  | -3.903398374 |
| H222 | -5.240944748  | -1.531334739  | 0.087324577  |
| H223 | -2.656870548  | -1.212518365  | -0.756655800 |
| H224 | -6.924526833  | -4.375716463  | -3.247865672 |
| H225 | -4.934308919  | -2.579879049  | -4.568631477 |
| H226 | -8.134028515  | -1.220653146  | -1.804679149 |
| H227 | -13.093433165 | -0.561190356  | 0.046209929  |
| H228 | -9.875035093  | -2.530167899  | 0.459319939  |

|      |               |              |              |
|------|---------------|--------------|--------------|
| H229 | -10.723268093 | -1.651778554 | -1.985277334 |
| H230 | -9.646436520  | 0.503836761  | -0.059988222 |
| H231 | -13.795434215 | 2.452166826  | -2.842839214 |
| H232 | -5.478847236  | 0.967018132  | 0.073645660  |
| H233 | -5.980278996  | 0.928691759  | -1.616322711 |
| H234 | -14.719933499 | 1.201636807  | -0.816879100 |
| H235 | -9.962723997  | -0.165606338 | -2.565598246 |
| H236 | -5.865823783  | -1.301344903 | -2.781393921 |
| H237 | -5.175957392  | -4.638379228 | -3.208012275 |
| H238 | -7.519417707  | -1.387762570 | -6.635598569 |
| H239 | -1.526053314  | 2.513548717  | -2.453332844 |
| H240 | -6.496394037  | -2.636546530 | -7.372839502 |
| H241 | 3.798330774   | 1.589837127  | 10.398317593 |
| H242 | 2.702777636   | 1.693630836  | 9.189827880  |
| H243 | -2.809566282  | 4.963559449  | 3.412631341  |
| H244 | -4.822581563  | 3.067624705  | 2.477560701  |
| H245 | -4.772308565  | 5.420374461  | 5.122438785  |
| H246 | -4.109068092  | 2.577730623  | -2.065847187 |
| H247 | -5.269881225  | 3.566610472  | -3.484854951 |
| H248 | -6.196679448  | 3.689879632  | -2.194380958 |
| H249 | -3.208785364  | 2.560296955  | -5.397891313 |
| H250 | -4.251847430  | 2.128767505  | -6.784837601 |
| H251 | -8.084143667  | 8.823640364  | 3.933813364  |
| H252 | -9.792516099  | 8.857804597  | 3.403607200  |
| H253 | -6.479085079  | 7.793535261  | 2.547825960  |
| H254 | -6.941256869  | 6.829977764  | 1.175900304  |
| H255 | -6.125431668  | 9.313991209  | -1.102484701 |
| H256 | -2.791009097  | 6.529689304  | -2.751545034 |
| H257 | -10.446480023 | 3.743969444  | -1.820887220 |
| H258 | -8.324543716  | 3.076804530  | 2.632292528  |
| H259 | -7.108879388  | 5.954420185  | -1.502880381 |
| H260 | -1.466936108  | 5.959241043  | 1.195671254  |
| H261 | -2.092742130  | 7.183926445  | 3.229680413  |
| H262 | -2.978377677  | 4.954726626  | -0.565363188 |
| H263 | -4.580224234  | -1.394826362 | -6.839790069 |
| H264 | -2.932088759  | 9.985499015  | 4.586887271  |
| H265 | -2.301430006  | 0.302861412  | -6.536400498 |
| H266 | -1.748999188  | 7.563483672  | 0.515144816  |
| H267 | -6.926398485  | 3.656117009  | 0.686559869  |
| H268 | -5.958529788  | 2.075251942  | -4.962831079 |
| H269 | -4.025060103  | 8.929607212  | 5.503630619  |
| H270 | -4.509317066  | 9.109973288  | -1.664452017 |
| H271 | -7.647302029  | 7.600569968  | -1.418775387 |
| H272 | 0.266055295   | -0.681437973 | -7.047255165 |
| H273 | -1.112301108  | -2.744364569 | -5.958036821 |
| H274 | -11.862577152 | 3.279152577  | 0.159030776  |
| H275 | -3.984115008  | 0.550341874  | -4.162155313 |
| H276 | -4.171534601  | 7.424913401  | 1.118558082  |
| H277 | -3.000103302  | 7.827445194  | -1.586180468 |
| H278 | -1.469084976  | 5.683330591  | -1.091169873 |
| H279 | -4.914532584  | 5.545005600  | -2.048381857 |
| H280 | -6.819896567  | 3.995802319  | 6.552346050  |
| H281 | -7.423202440  | 6.124484430  | 4.088905902  |
| H282 | -9.494777246  | 7.624066510  | 5.527745304  |
| H283 | -5.960997643  | 5.473834603  | 7.043210136  |
| H284 | -9.547442055  | 4.640043767  | 3.969015855  |
| H285 | 7.948966761   | 6.541618084  | -3.020482383 |
| H286 | 8.651830554   | 4.913367458  | -3.040173820 |
| H287 | 10.160779873  | 2.863951053  | 0.679339546  |
| H288 | 10.061456285  | 6.363037901  | -4.300091271 |
| H289 | 9.276307032   | 5.446866934  | -5.410221265 |
| H290 | 0.461449506   | 4.781792701  | 5.919406306  |
| H291 | -1.775838736  | 5.463132674  | 7.981389922  |
| H292 | -1.124378798  | 8.644779423  | 5.184434628  |
| H293 | -1.287400291  | 4.393962704  | 5.798596025  |
| H294 | -1.064655297  | 6.868463339  | 8.420033500  |
| H295 | 3.677778868   | 8.265353411  | 1.356179588  |
| H296 | -0.032872846  | 7.135971300  | 6.315889031  |
| H297 | 6.584911137   | -6.268813212 | 3.831981935  |
| H298 | 9.173923102   | -4.696313827 | 3.352720386  |
| H299 | 3.504661143   | 6.988815260  | -0.509534097 |
| H300 | 1.917294384   | -1.132447013 | 5.165692200  |
| H301 | 2.106539429   | 7.806054471  | -3.714739003 |

|       |               |               |              |
|-------|---------------|---------------|--------------|
| H302  | 2.142721380   | 1.528548448   | -4.231341310 |
| H303  | 1.069823063   | 6.811217156   | -2.689701572 |
| H304  | 4.431477614   | -4.717459379  | 3.727789609  |
| H305  | 3.420980670   | 5.688953289   | -2.023066858 |
| H306  | 5.158666034   | -3.814670558  | 2.397663130  |
| H307  | 7.020590360   | -5.345699955  | 2.377849016  |
| H308  | 7.116736622   | -3.229695569  | 3.842076277  |
| H309  | 6.433766503   | -4.183590278  | 5.173056101  |
| H310  | -0.802674454  | 3.239770329   | -7.499131923 |
| H311  | 8.658545435   | -7.652133759  | 3.341904021  |
| H312  | 10.298098786  | -8.283786061  | 0.814461222  |
| H313  | 1.679716708   | 2.852147651   | -2.160539162 |
| H314  | 10.183668127  | -9.700825302  | 3.356098141  |
| H315  | 9.512133148   | -10.084382544 | 1.910631381  |
| H316  | 4.903391785   | -1.761918807  | 3.623970661  |
| H317  | 0.017072175   | 4.666256773   | -2.210007155 |
| H318  | 0.945037875   | 2.057876282   | -6.335278564 |
| H319  | 12.265968525  | -2.714055000  | 0.544364973  |
| H320  | 10.782698676  | 0.131962813   | -0.563796091 |
| H321  | 9.945200842   | -3.085993599  | 1.230127232  |
| H322  | 12.601360886  | -2.447374562  | -0.935962617 |
| H323  | 4.384140387   | 10.118658781  | -0.595462290 |
| H324  | 7.774003579   | -1.024733964  | 2.298482286  |
| H325  | 6.369032255   | -4.363965768  | -0.711992310 |
| H326  | 5.929519515   | 5.517788144   | -2.602136673 |
| H327  | 8.430158313   | -3.889568903  | -2.133345345 |
| H328  | 8.949321025   | 2.259117891   | -4.583129774 |
| H329  | 6.778342004   | 1.498213289   | -3.492860685 |
| H330  | 11.597827751  | -8.437246393  | 1.998224660  |
| H331  | 3.180182213   | -0.482137159  | 4.165809568  |
| H332  | 9.334176796   | -1.743060993  | 4.009989283  |
| H333  | 7.367227129   | -0.130760790  | 3.501725715  |
| H334  | 9.748068720   | -3.747161663  | 5.238940305  |
| H335  | 3.141858764   | -4.395666840  | 5.315011457  |
| H336  | 10.993037889  | -3.308165469  | -4.944436438 |
| H337  | 9.002041559   | -1.031260228  | -3.071357577 |
| H338  | 9.665462447   | -1.686169350  | -1.563490754 |
| H339  | 7.620943492   | -2.999958307  | -3.451025692 |
| H340  | 4.293830590   | 3.834945581   | -3.227810648 |
| H341  | -1.179022488  | 5.242416718   | -4.340139523 |
| H342  | -1.858538025  | 4.414446743   | -6.678822301 |
| H343  | 5.142717750   | -3.059431939  | -0.612937938 |
| H344  | 10.469281819  | -2.567028117  | 3.347225575  |
| H345  | 10.895073786  | -4.169806897  | 1.828577481  |
| H346  | 1.698398892   | -3.466678561  | 5.429364432  |
| H347  | 10.935065408  | 2.128761081   | -2.959997206 |
| H348  | 9.344283587   | 0.503768845   | 0.387400527  |
| H349  | 4.699072719   | 4.152600870   | -4.939945727 |
| H350  | 2.066043184   | 8.934157696   | 1.014344583  |
| H351  | 3.571947889   | -1.400268615  | 7.494168966  |
| H352  | 3.900288061   | 0.263372317   | 6.954058592  |
| H353  | 12.366796703  | 3.393759843   | 0.095869656  |
| H354  | 12.664807248  | 1.920679833   | -0.549243201 |
| H355  | 13.290843461  | -0.961904435  | 2.830762574  |
| H356  | 12.180129949  | -0.210192219  | 0.983947281  |
| H357  | 13.976116468  | 1.686981991   | 3.092334977  |
| H358  | 11.853339660  | -0.453436677  | 3.745475459  |
| H359  | 5.981584269   | 0.489797249   | 8.778776573  |
| H360  | -12.237519948 | 4.172982494   | 5.512507572  |
| H361  | 9.763355893   | -5.569283267  | 7.632849098  |
| H362  | 8.004446064   | -3.430636086  | 7.672579885  |
| H363  | -12.095113288 | 4.900507540   | 2.592206476  |
| H364  | -10.570532636 | 2.395412807   | 3.538522420  |
| H365  | -11.992161580 | 2.399407411   | 2.482316253  |
| H366  | -8.326114802  | 4.086198887   | -2.572588377 |
| H367  | 0.991913219   | -0.602274838  | 0.398458549  |
| H368  | -0.702653121  | 0.302419697   | -1.506594378 |
| Mo369 | 6.115636075   | 0.320455993   | -0.459887706 |
| N370  | 0.637364283   | -5.427975017  | -8.245847464 |
| N371  | -3.008655975  | -5.854196216  | -7.565389878 |
| N372  | -3.595448872  | -8.167477199  | -6.035736404 |
| N373  | -1.253325459  | -8.532123506  | -4.528944884 |
| N374  | -1.277705666  | -6.179491874  | -2.900580514 |

|      |               |               |              |
|------|---------------|---------------|--------------|
| N375 | -3.672639735  | -6.698645736  | -1.429316290 |
| N376 | -3.176119317  | -9.250543850  | -0.165165039 |
| N377 | -0.549486374  | -9.199148258  | 1.000994457  |
| N378 | -0.056600856  | -6.720871877  | 2.191784212  |
| N379 | -2.420437586  | -5.338178756  | 3.370055918  |
| N380 | -3.825969647  | -7.671000635  | 4.373626270  |
| N381 | 9.689785976   | -9.309675404  | 2.551253566  |
| N382 | 9.111688098   | -6.754562247  | 3.135990682  |
| N383 | 4.486916993   | -2.630032254  | 3.976262633  |
| N384 | 2.614388124   | -3.585510925  | 5.006859541  |
| N385 | 2.642777979   | -1.319180753  | 4.477451046  |
| N386 | 9.512974221   | -4.569210181  | 5.837158971  |
| N387 | -0.744923638  | -0.910233242  | -7.034156903 |
| N388 | 3.656059870   | -1.288866723  | -5.282137178 |
| N389 | -2.935613801  | -0.102894636  | -5.828709647 |
| N390 | -5.448974934  | -1.141716233  | -6.373316591 |
| N391 | -5.844902896  | -3.017255430  | -4.379260307 |
| N392 | -5.880273936  | -1.775637575  | -1.880301854 |
| N393 | -3.479991537  | 1.758662184   | -1.865410671 |
| N394 | -1.720642468  | 0.518434257   | -1.649206240 |
| N395 | -8.301997706  | -0.917512716  | -0.848513740 |
| N396 | -12.075660340 | 1.174150230   | -2.609982215 |
| N397 | -13.810068690 | 1.021484425   | -1.233724077 |
| N398 | 3.667262699   | 1.421281675   | 9.398292789  |
| N399 | -0.930935836  | 6.028813520   | 7.849574005  |
| N400 | -2.051088846  | 8.249122228   | 5.322608637  |
| N401 | -2.976312657  | 7.499313018   | 2.799972024  |
| N402 | -4.639527383  | 6.514487798   | -1.814552867 |
| N403 | -5.353766984  | 8.684530187   | -1.298127312 |
| N404 | -6.877043944  | 6.940317683   | -1.368116275 |
| N405 | -3.745579723  | 4.763548015   | 3.013554449  |
| N406 | -5.655843552  | 4.903693625   | 5.063321180  |
| N407 | -8.125977958  | 6.244458778   | 4.820911470  |
| N408 | -7.224459722  | 7.318603208   | 2.024599015  |
| N409 | -10.460879777 | 5.079683131   | 3.886450754  |
| N410 | 9.145522886   | 6.194571834   | -4.722403978 |
| N411 | 5.862118602   | 5.182371602   | -3.567200463 |
| N412 | 3.075487115   | 6.174281952   | -2.876235703 |
| N413 | 3.024204148   | 7.897066902   | -0.576188508 |
| N414 | 4.158278871   | 5.608156384   | -8.010620253 |
| N415 | 1.380362861   | 5.127979591   | -7.528140187 |
| N416 | 11.927214626  | 2.617418573   | -0.406148764 |
| N417 | 7.994037439   | 1.180074532   | -1.748005033 |
| N418 | 8.879347173   | 1.955621435   | -3.616072799 |
| N419 | 12.101002031  | 0.391071310   | 1.804266122  |
| N420 | -2.258015539  | 2.660862502   | 0.895513577  |
| N421 | -1.865119641  | 1.677012109   | 1.225841254  |
| O422 | -1.251705420  | -5.840193677  | -6.114319603 |
| O423 | -4.296349029  | -6.809808504  | -4.343743384 |
| O424 | -2.446478381  | -9.792732621  | -3.041098148 |
| O425 | -0.226956863  | -7.429912778  | -1.318281967 |
| O426 | -2.716104039  | -5.562836629  | 0.293548181  |
| O427 | -4.409790618  | -8.445646037  | 1.580106076  |
| O428 | -1.244842757  | -10.817993646 | 2.473994348  |
| O429 | 1.933109607   | -7.467436216  | 3.065442656  |
| O430 | -0.886266848  | -5.037767223  | 5.037613819  |
| O431 | -3.965470227  | -6.482564656  | 6.303693345  |
| O432 | -3.423891888  | -9.898482334  | 7.154165752  |
| O433 | 10.983007831  | -5.928991359  | 2.053031161  |
| O434 | 8.569797894   | -6.665511601  | 5.923152965  |
| O435 | 9.379987526   | -3.180433336  | 9.156810582  |
| O436 | -3.051688662  | -1.898486888  | -4.404981276 |
| O437 | 2.024234614   | -0.439451567  | -6.616612239 |
| O438 | -6.437169951  | 0.305336804   | -4.906522344 |
| O439 | -5.228683036  | 2.741212994   | -5.040976448 |
| O440 | -7.960874147  | -3.469812571  | -5.154049952 |
| O441 | -5.879823915  | -3.793517142  | -0.805057021 |
| O442 | -7.360077972  | -0.529939072  | 1.197160874  |
| O443 | -10.912154013 | -1.128325845  | 1.521122523  |
| O444 | 5.778892518   | -1.422256481  | 9.467275217  |
| O445 | -2.240406528  | 0.642059079   | 6.937863374  |
| O446 | -3.263662271  | 6.477579351   | 6.093937191  |
| O447 | -4.907049903  | 8.708078354   | 3.102686292  |

|      |               |              |              |
|------|---------------|--------------|--------------|
| O448 | -5.136942516  | 5.134723691  | 1.230952407  |
| O449 | -6.610813895  | 2.965476384  | 4.299501219  |
| O450 | -3.326617656  | 2.914464141  | 5.464971012  |
| O451 | -8.540594420  | 6.002165823  | 7.062255613  |
| O452 | -11.636748189 | 7.020380337  | 4.126827052  |
| O453 | -9.407785923  | 7.301367799  | 1.345344506  |
| O454 | -13.764714311 | 3.714910280  | 4.236001577  |
| O455 | -7.775609729  | 4.062115277  | -1.765762841 |
| O456 | 7.032216196   | 4.574253930  | -5.447429320 |
| O457 | 3.061245003   | 6.080667273  | -5.169633228 |
| O458 | 1.590032901   | 9.288575692  | -1.659395150 |
| O459 | 3.562194177   | 11.093076181 | 0.997658482  |
| O460 | 1.374742810   | 4.043521715  | -9.536719704 |
| O461 | 5.516674514   | 0.422628481  | -7.073413064 |
| O462 | 6.416839906   | 2.025143652  | -5.809680084 |
| O463 | -1.479503037  | 6.909976806  | -6.409596785 |
| O464 | 11.294137857  | 2.250147669  | 2.818146060  |
| O465 | 13.735099423  | 0.901776248  | 4.959648707  |
| O466 | 4.392585086   | -3.360467425 | -3.127024529 |
| O467 | 5.786853320   | -5.092460273 | -3.105337335 |
| O468 | 11.614541322  | -2.667187263 | -2.841522709 |
| O469 | 10.168299077  | -2.947444779 | -4.554189862 |
| O470 | 7.600152693   | -1.086860046 | 0.494649520  |
| O471 | 8.407913935   | -3.190671132 | 0.398759831  |
| O472 | 6.433647412   | -1.213514660 | -1.856172584 |
| O473 | 10.131780788  | -2.283823330 | 4.237608157  |
| O474 | 7.794200601   | -0.981957740 | 3.289265942  |
| O475 | -5.268174923  | 3.808089717  | -2.517523555 |
| O476 | 12.991896116  | -2.378473045 | -0.040798259 |
| O477 | 10.831772578  | -3.190444437 | 1.676786296  |
| S478 | -0.491877980  | 5.472630965  | 3.780691786  |
| S479 | 0.987643029   | 4.261517915  | 0.461199015  |
| S480 | 4.610438152   | 1.505649248  | -1.920230644 |
| S481 | 0.934928239   | 1.864974592  | 3.101372730  |
| S482 | 1.314972836   | 0.394770958  | -0.481031834 |
| S483 | 4.745991830   | 4.999978125  | -0.295730529 |
| S484 | 4.478988088   | -0.884858558 | 0.848916834  |
| S485 | 3.203316054   | 4.723616591  | 3.290217671  |
| S486 | 6.799733118   | 2.026665892  | 1.070069107  |
| S487 | 4.694364852   | 1.160161009  | 4.063454502  |

### Structure B 35 (1)

|            |              |                      |                                        |
|------------|--------------|----------------------|----------------------------------------|
| B 35 (1)   |              | bm22b2n2xd35tc.car_3 |                                        |
| associated |              | C1                   | -1.678937629 -5.823096998 -7.293422277 |
| Fe( 139)   | 0.539 -2.252 | C2                   | -0.749448952 -5.803272067 -8.510909246 |
| Fe( 140)   | 0.441 -1.695 | C3                   | -4.010769255 -5.797623770 -6.515558788 |
| Fe( 141)   | 0.547 -2.557 | C4                   | -3.975173824 -6.969447318 -5.536141637 |
| Fe( 142)   | 0.588 2.946  | C5                   | -3.481523566 -9.335190146 -5.170161938 |
| Fe( 143)   | 0.564 2.959  | C6                   | -2.350085781 -9.231661329 -4.142085222 |
| Fe( 144)   | 0.506 2.307  | C7                   | -0.171073193 -8.254505444 -3.595853885 |
| Fe( 145)   | 0.469 -0.264 | C8                   | -0.552913991 -7.252532849 -2.502555742 |
|            |              | C9                   | -1.768581279 -5.224076023 -1.912078465 |
|            |              | C10                  | -2.761516016 -5.841416123 -0.915911206 |
|            |              | C11                  | -4.651551494 -7.321479778 -0.550926936 |
|            |              | C12                  | -4.058916640 -8.378447796 0.389788005  |
|            |              | C13                  | -2.676367358 -10.385983352 0.593614812 |
|            |              | C14                  | -1.427823308 -10.144449876 1.451938480 |
|            |              | C15                  | 0.735294705 -8.993132848 1.644744468   |
|            |              | C16                  | 0.922291012 -7.660273532 2.374465122   |
|            |              | C17                  | -0.023636283 -5.409621227 2.807951168  |
|            |              | C18                  | -1.150643579 -5.259612319 3.846487599  |
|            |              | C19                  | -0.005938392 -4.278319233 1.744983413  |
|            |              | C20                  | -0.166381620 -2.893985895 2.383118553  |
|            |              | C21                  | 1.272470720 -4.352514632 0.903665174   |
|            |              | C22                  | -3.579372598 -5.228570452 4.265161123  |
|            |              | C23                  | -3.814953800 -6.517937652 5.076306856  |
|            |              | C24                  | -4.834760966 -4.783205693 3.477124770  |
|            |              | C25                  | -6.079160964 -4.773278508 4.371282102  |
|            |              | C26                  | -4.617727167 -3.402273525 2.846234942  |
|            |              | C27                  | -4.128540749 -8.924184344 5.071063882  |
|            |              | C28                  | -3.164299361 -9.184996292 6.211026570  |
|            |              | C29                  | 10.500187020 -8.268114518 1.880239476  |

|      |               |              |              |
|------|---------------|--------------|--------------|
| C30  | 10.211250708  | -6.849409583 | 2.374383387  |
| C31  | 8.609662318   | -5.531481254 | 3.773300990  |
| C32  | 8.887145644   | -5.632959682 | 5.286683088  |
| C33  | 7.110087151   | -5.365953458 | 3.475852484  |
| C34  | 6.486772043   | -4.099888994 | 4.071899260  |
| C35  | 5.086958743   | -3.876984934 | 3.498243934  |
| C36  | 3.246415345   | -2.520136738 | 4.513769725  |
| C37  | 9.876684801   | -4.526681462 | 7.233269991  |
| C38  | 9.007518575   | -3.622710985 | 8.082737229  |
| C39  | -1.063615234  | -1.657888434 | -5.819563924 |
| C40  | -2.446295882  | -1.249807563 | -5.285683644 |
| C41  | -0.033562117  | -1.395122538 | -4.698563463 |
| C42  | 1.357182520   | -2.028676864 | -4.891194665 |
| C43  | 2.362179551   | -1.178825618 | -5.667062444 |
| C44  | -4.078535313  | 0.578645273  | -5.261749303 |
| C45  | -5.423579440  | -0.104011121 | -5.517851789 |
| C46  | -4.145792174  | 2.059686591  | -5.693091934 |
| C47  | -6.619666673  | -1.995349436 | -6.490982755 |
| C48  | -6.873243682  | -2.896995964 | -5.273591333 |
| C49  | -5.954730641  | -3.854006637 | -3.201981143 |
| C50  | -5.899264172  | -3.134735998 | -1.855620794 |
| C51  | -5.884993295  | -0.993237268 | -0.646364534 |
| C52  | -7.282128865  | -0.830967555 | -0.001172216 |
| C53  | -5.361154615  | 0.434516449  | -0.859738821 |
| C54  | -3.926217366  | 0.583647079  | -1.249555760 |
| C55  | -2.808683050  | -0.206571328 | -1.125034915 |
| C56  | -2.163016612  | 1.729436744  | -2.002871887 |
| C57  | -9.682613670  | -0.537649129 | -0.477228131 |
| C58  | -10.212986625 | -1.490319096 | 0.588775174  |
| C59  | -10.571416999 | -0.604736750 | -1.745552342 |
| C60  | -11.852786914 | 0.172347903  | -1.687260818 |
| C61  | -12.926839659 | 0.070881124  | -0.823702386 |
| C62  | -13.291511203 | 1.659673003  | -2.324496880 |
| C63  | 3.841579688   | -0.003454808 | 9.108861260  |
| C64  | 5.321422938   | -0.340283372 | 9.127397999  |
| C65  | 3.331173082   | -0.342550100 | 7.682091227  |
| C66  | 1.851405022   | -0.096499287 | 7.505360505  |
| C67  | 0.901620149   | -1.085636091 | 7.824851307  |
| C68  | 1.378260716   | 1.129505767  | 7.005473305  |
| C69  | -0.468580019  | -0.865196192 | 7.644780418  |
| C70  | 0.014447916   | 1.368903656  | 6.833553614  |
| C71  | -0.909633716  | 0.367831268  | 7.149701037  |
| C72  | -0.860870989  | 6.427983667  | 6.441763370  |
| C73  | -2.169886069  | 7.050031512  | 5.941114487  |
| C74  | -0.508402357  | 5.193607869  | 5.597688434  |
| C75  | -3.208339088  | 8.944837713  | 4.768233914  |
| C76  | -3.771814657  | 8.354448538  | 3.475207460  |
| C77  | -3.417172753  | 6.790781043  | 1.599433639  |
| C78  | -4.167340641  | 5.480089252  | 1.918594746  |
| C79  | -2.207543004  | 6.574993962  | 0.670543395  |
| C80  | -2.462946814  | 5.913189520  | -0.688111344 |
| C81  | -3.194326230  | 6.754661872  | -1.752790087 |
| C82  | -5.609744440  | 7.377636669  | -1.524077526 |
| C83  | -4.435154853  | 3.527639765  | 3.361245507  |
| C84  | -5.661882021  | 3.771207256  | 4.266027459  |
| C85  | -3.520331900  | 2.499111504  | 4.037609739  |
| C86  | -6.518944091  | 4.995653630  | 6.204628028  |
| C87  | -7.816862949  | 5.789865931  | 6.058233215  |
| C88  | -9.269196062  | 7.119985349  | 4.572918561  |
| C89  | -10.583046696 | 6.409222126  | 4.176370902  |
| C90  | -8.915568474  | 8.213001668  | 3.535374422  |
| C91  | -8.553245597  | 7.604266547  | 2.185920256  |
| C92  | -11.621064447 | 4.321828027  | 3.384272013  |
| C93  | -12.644893366 | 4.053895072  | 4.482320553  |
| C94  | -11.128392380 | 2.983194346  | 2.770692299  |
| C95  | -10.241477745 | 3.190418499  | 1.563025726  |
| C96  | -10.807532413 | 3.361262710  | 0.290816596  |
| C97  | -8.843399521  | 3.265028449  | 1.680617338  |
| C98  | -10.013744180 | 3.627800616  | -0.827630457 |
| C99  | -8.033777379  | 3.552865437  | 0.577173880  |
| C100 | -8.632331642  | 3.736400964  | -0.666796551 |
| C101 | 8.222957387   | 5.698701417  | -3.665893911 |
| C102 | 6.975887905   | 5.106871412  | -4.301557202 |

|       |              |               |              |
|-------|--------------|---------------|--------------|
| C103  | 4.571888193  | 4.603177721   | -3.954640595 |
| C104  | 3.486943208  | 5.679879802   | -4.057736280 |
| C105  | 2.081714418  | 7.226659102   | -2.772927431 |
| C106  | 2.230866479  | 8.219179110   | -1.622917762 |
| C107  | 3.070333033  | 8.768970319   | 0.586710014  |
| C108  | 3.726596412  | 10.104335700  | 0.304036003  |
| C109  | 3.524991431  | 4.362763004   | -8.473455829 |
| C110  | 2.000316421  | 4.501044265   | -8.575660761 |
| C111  | 3.878849188  | 3.077735109   | -7.688954462 |
| C112  | 5.354309110  | 2.685626660   | -7.897057746 |
| C113  | 5.767724635  | 1.611571649   | -6.917257914 |
| C114  | -0.072058450 | 5.265964136   | -7.513560556 |
| C115  | -0.450772675 | 6.648295636   | -7.016848608 |
| C116  | -0.812760774 | 4.101639358   | -6.809578199 |
| C117  | -0.193746725 | 3.707265929   | -5.490885219 |
| C118  | -0.464460516 | 4.423878498   | -4.311325435 |
| C119  | 0.734799736  | 2.652642478   | -5.434425086 |
| C120  | 0.199967876  | 4.106114617   | -3.120401487 |
| C121  | 1.401428605  | 2.337446068   | -4.244110899 |
| C122  | 1.141803350  | 3.070694931   | -3.082549074 |
| C123  | 10.850320050 | 2.060989863   | 0.428313302  |
| C124  | 11.393149120 | 1.577770254   | 1.783170961  |
| C125  | 10.077380916 | 0.953026140   | -0.307009407 |
| C126  | 9.355634911  | 1.372550080   | -1.551405823 |
| C127  | 9.908249235  | 1.859197058   | -2.720433650 |
| C128  | 7.735752658  | 1.542038690   | -3.007156605 |
| C129  | 12.605242175 | -0.095488747  | 3.068293772  |
| C130  | 13.479389117 | 0.923929236   | 3.763796982  |
| C131  | 5.298527474  | -3.951602483  | -2.545491559 |
| C132  | 5.925187079  | -3.511027803  | -1.254142631 |
| C133  | 7.023615855  | -2.390657815  | -1.455921372 |
| C134  | 8.094877942  | -2.892680746  | -2.464846235 |
| C135  | 9.309243681  | -1.954289174  | -2.563798520 |
| C136  | 10.482114359 | -2.548150684  | -3.291959688 |
| C137  | 7.736788850  | -2.235292471  | -0.076604340 |
| C138  | 3.506067118  | 2.243189158   | 1.094566364  |
| Fe139 | 5.035308777  | 2.788765329   | -0.089705232 |
| Fe140 | 1.382223423  | 2.166180127   | 1.027654284  |
| Fe141 | 3.288367302  | 2.509638978   | 3.092582756  |
| Fe142 | 3.314123624  | 4.266728173   | 1.133896322  |
| Fe143 | 1.259584017  | 4.158241720   | 2.916708434  |
| Fe144 | 4.969863946  | 1.048923657   | 1.858078280  |
| Fe145 | 3.493349312  | 0.794059295   | -0.132707090 |
| H146  | 0.996698310  | -5.990297000  | -7.475528081 |
| H147  | 0.683139031  | -4.457654582  | -7.944852938 |
| H148  | -3.316851099 | -5.753147039  | -8.536943382 |
| H149  | -1.173529407 | -5.135098953  | -9.276383499 |
| H150  | -0.773938288 | -6.817791140  | -8.945628043 |
| H151  | -3.885477084 | -4.887931069  | -5.912538958 |
| H152  | -3.365682637 | -8.245874007  | -7.022982470 |
| H153  | -5.002971152 | -5.769951796  | -6.985097469 |
| H154  | -3.307021598 | -10.217703807 | -5.798693476 |
| H155  | -1.292629251 | -7.989436130  | -5.391149925 |
| H156  | -4.411439923 | -9.490526930  | -4.608245322 |
| H157  | -0.937307055 | -4.820796673  | -1.319174017 |
| H158  | -1.471036503 | -6.026213116  | -3.890258087 |
| H159  | 0.685016970  | -7.868545851  | -4.165416208 |
| H160  | -5.135139761 | -6.561348326  | 0.076277820  |
| H161  | -3.740696216 | -6.844508060  | -2.440514388 |
| H162  | 0.135327935  | -9.179454419  | -3.092186552 |
| H163  | -2.250996062 | -4.395013336  | -2.448553159 |
| H164  | -2.984930905 | -9.216932795  | -1.169846963 |
| H165  | -5.418801661 | -7.800573360  | -1.174846466 |
| H166  | 1.391718558  | -5.339086492  | 0.432092000  |
| H167  | 1.254137124  | -3.595005124  | 0.105204766  |
| H168  | 2.161955877  | -4.157912056  | 1.522523098  |
| H169  | -0.868484240 | -4.449056862  | 1.081575356  |
| H170  | -2.441257145 | -11.196030683 | -0.112956595 |
| H171  | -3.753840718 | -3.387139574  | 2.166738133  |
| H172  | -3.838398268 | -7.698378661  | 3.356352563  |
| H173  | -6.301390778 | -5.765715055  | 4.790375399  |
| H174  | -0.191298972 | -2.121841895  | 1.599134083  |
| H175  | 0.675669339  | -2.654219856  | 3.047963838  |



|      |               |               |              |
|------|---------------|---------------|--------------|
| H176 | 3.335186581   | -0.681054034  | 9.823424979  |
| H177 | -5.503614311  | -3.111231976  | 2.264508016  |
| H178 | -6.952677215  | -4.444996183  | 3.788972149  |
| H179 | -4.456478523  | -2.643419325  | 3.628781348  |
| H180 | -5.948419076  | -4.073096421  | 5.211668931  |
| H181 | -4.998942333  | -5.515097947  | 2.665144302  |
| H182 | -3.340617813  | -4.465415442  | 5.019830020  |
| H183 | -2.590405615  | -5.462061003  | 2.370385751  |
| H184 | -1.097757452  | -2.806033924  | 2.961514853  |
| H185 | -2.599393461  | 2.399689448   | 3.438154868  |
| H186 | -4.053959317  | 1.534162201   | 4.028822958  |
| H187 | -2.885510391  | 2.127813704   | 5.856908610  |
| H188 | -2.784926279  | -0.132528602  | 7.174485719  |
| H189 | -0.330440161  | 2.316689270   | 6.420087274  |
| H190 | 2.089992968   | 1.901975030   | 6.706682245  |
| H191 | 1.234723241   | -2.050961776  | 8.216837160  |
| H192 | -0.820239954  | -6.964297534  | 1.562591802  |
| H193 | 1.546298076   | -9.072185870  | 0.904720387  |
| H194 | 0.880618312   | -9.789371103  | 2.386404407  |
| H195 | -0.685824281  | -8.777790975  | 0.076832274  |
| H196 | -3.456988747  | -10.742464738 | 1.276863734  |
| H197 | -1.189018810  | -1.653925405  | 7.878393026  |
| H198 | 0.907490044   | -5.373534916  | 3.388984473  |
| H199 | -5.158541521  | -8.967242672  | 5.459550889  |
| H200 | -4.002952726  | -9.746880158  | 4.348669860  |
| H201 | -2.158995865  | -8.716269261  | 6.093236466  |
| H202 | 10.930957584  | -4.234618553  | 7.354130838  |
| H203 | 4.359435262   | -0.747613174  | -5.781408869 |
| H204 | 6.489687913   | -5.468007133  | -2.522352535 |
| H205 | 5.484157238   | 2.291117813   | -8.915130392 |
| H206 | 6.001231499   | 3.567902476   | -7.782321262 |
| H207 | 3.241159856   | 2.242302177   | -8.015803669 |
| H208 | 0.286154830   | 7.444733782   | -7.275233098 |
| H209 | 3.840598757   | 4.211170737   | -9.517621011 |
| H210 | 0.061806733   | -0.305322056  | -4.566265757 |
| H211 | 1.266586025   | -2.992540828  | -5.422403535 |
| H212 | 1.915877831   | 5.427932790   | -6.721442643 |
| H213 | -0.386220769  | 5.261536631   | -8.576451046 |
| H214 | 4.040082377   | 5.725026378   | -6.993851370 |
| H215 | 3.928669360   | -1.859084359  | -4.479211839 |
| H216 | 3.660600513   | 3.241553511   | -6.622174641 |
| H217 | 5.158649530   | 5.570893731   | -8.192188775 |
| H218 | -0.965914507  | -1.479216656  | -7.875055182 |
| H219 | -0.462388619  | -1.795560629  | -3.767762493 |
| H220 | 6.552541723   | 3.022167233   | -5.784953600 |
| H221 | 1.780109233   | -2.269935338  | -3.905242590 |
| H222 | -5.271251471  | -1.527729382  | 0.092916235  |
| H223 | -2.684185082  | -1.207847494  | -0.728972473 |
| H224 | -6.922349243  | -4.374021777  | -3.248564433 |
| H225 | -4.936296862  | -2.575796256  | -4.570459799 |
| H226 | -8.155483438  | -1.229485996  | -1.812670652 |
| H227 | -13.120117694 | -0.560902491  | 0.035366710  |
| H228 | -9.899974717  | -2.553466131  | 0.4407335978 |
| H229 | -10.753416300 | -1.663618189  | -2.000439570 |
| H230 | -9.678812317  | 0.481850021   | -0.062996802 |
| H231 | -13.805797047 | 2.458773079   | -2.851600514 |
| H232 | -5.522731377  | 0.973270836   | 0.088253829  |
| H233 | -5.991247343  | 0.936886484   | -1.612146958 |
| H234 | -14.732171190 | 1.217701736   | -0.819382208 |
| H235 | -9.987559079  | -0.177977374  | -2.576206640 |
| H236 | -5.885410571  | -1.288390926  | -2.782058564 |
| H237 | -5.172383872  | -4.627478011  | -3.201841485 |
| H238 | -7.522360374  | -1.387512196  | -6.633057855 |
| H239 | -1.532780916  | 2.524368848   | -2.394035840 |
| H240 | -6.502765325  | -2.634443276  | -7.375163901 |
| H241 | 3.798866500   | 1.591622951   | 10.395798218 |
| H242 | 2.703401992   | 1.695998364   | 9.187256986  |
| H243 | -2.803349766  | 4.951973585   | 3.386305158  |
| H244 | -4.828147746  | 3.069758933   | 2.442134272  |
| H245 | -4.762911630  | 5.414718663   | 5.105471977  |
| H246 | -4.117945812  | 2.594274717   | -2.014271695 |
| H247 | -5.285846363  | 3.558331517   | -3.486108550 |
| H248 | -6.229743188  | 3.693084559   | -2.208821803 |

|      |               |               |              |
|------|---------------|---------------|--------------|
| H249 | -3.211835919  | 2.561502069   | -5.402701750 |
| H250 | -4.255428850  | 2.125915796   | -6.788587900 |
| H251 | -8.087401610  | 8.815490233   | 3.937885291  |
| H252 | -9.795635767  | 8.856064040   | 3.407281373  |
| H253 | -6.485004549  | 7.793541079   | 2.544804996  |
| H254 | -6.949955266  | 6.832088434   | 1.172616410  |
| H255 | -6.122774355  | 9.314457617   | -1.111289187 |
| H256 | -2.791075944  | 6.525939218   | -2.750384604 |
| H257 | -10.470101862 | 3.744033245   | -1.814069608 |
| H258 | -8.356404097  | 3.093729916   | 2.644819267  |
| H259 | -7.114058981  | 5.956301587   | -1.499120394 |
| H260 | -1.459144006  | 5.961742997   | 1.197405979  |
| H261 | -2.084732803  | 7.192718757   | 3.222487015  |
| H262 | -2.980121114  | 4.949737952   | -0.559362666 |
| H263 | -4.585111359  | -1.394012880  | -6.845646570 |
| H264 | -2.937129085  | 9.992164450   | 4.574124205  |
| H265 | -2.304310109  | 0.300124029   | -6.543802991 |
| H266 | -1.742588066  | 7.561500746   | 0.508010429  |
| H267 | -6.954764402  | 3.662697330   | 0.697948706  |
| H268 | -5.961422630  | 2.074670594   | -4.967537321 |
| H269 | -4.031994832  | 8.940486079   | 5.494878191  |
| H270 | -4.509817757  | 9.107252313   | -1.678465624 |
| H271 | -7.647167686  | 7.605981225   | -1.429702835 |
| H272 | 0.259049061   | -0.688908531  | -7.060505162 |
| H273 | -1.118881637  | -2.752230679  | -5.972156674 |
| H274 | -11.889957354 | 3.285741501   | 0.163724188  |
| H275 | -3.979199306  | 0.551520049   | -4.163930456 |
| H276 | -4.164432217  | 7.431654293   | 1.111731509  |
| H277 | -2.999168911  | 7.821133051   | -1.582075459 |
| H278 | -1.468869266  | 5.673476610   | -1.090033223 |
| H279 | -4.920121239  | 5.542960959   | -2.055345036 |
| H280 | -6.807765542  | 3.986172323   | 6.533655154  |
| H281 | -7.440322707  | 6.111212129   | 4.067712318  |
| H282 | -9.490369619  | 7.613599088   | 5.530517168  |
| H283 | -5.955988831  | 5.468478509   | 7.020629323  |
| H284 | -9.578846428  | 4.644156462   | 3.970599743  |
| H285 | 7.939901509   | 6.523556995   | -2.995373244 |
| H286 | 8.644588861   | 4.896552606   | -3.024422489 |
| H287 | 10.152445730  | 2.875936863   | 0.668733699  |
| H288 | 10.056550346  | 6.355393208   | -4.272179332 |
| H289 | 9.274058080   | 5.448405088   | -5.390102678 |
| H290 | 0.453204326   | 4.801835267   | 5.953002982  |
| H291 | -1.792532089  | 5.456055772   | 7.972199564  |
| H292 | -1.131164455  | 8.655885304   | 5.188261701  |
| H293 | -1.288508356  | 4.431862730   | 5.738625329  |
| H294 | -1.089074508  | 6.856974617   | 8.436224420  |
| H295 | 3.670334342   | 8.264980537   | 1.361217153  |
| H296 | -0.047160365  | 7.163106257   | 6.345665929  |
| H297 | 6.577534711   | -6.260993170  | 3.837686455  |
| H298 | 9.162252340   | -4.685283199  | 3.347469520  |
| H299 | 3.510153579   | 6.991488076   | -0.507148320 |
| H300 | 1.901452241   | -1.148298993  | 5.187426914  |
| H301 | 2.104636029   | 7.799302888   | -3.708579348 |
| H302 | 2.135790761   | 1.529681201   | -4.225651457 |
| H303 | 1.064160720   | 6.808469286   | -2.686047098 |
| H304 | 4.425107553   | -4.720836089  | 3.733875294  |
| H305 | 3.416966621   | 5.686971831   | -2.017632113 |
| H306 | 5.142807954   | -3.817869591  | 2.398488807  |
| H307 | 7.006175705   | -5.343480349  | 2.378860776  |
| H308 | 7.102752974   | -3.220088293  | 3.830488798  |
| H309 | 6.428399825   | -4.170347314  | 5.170085369  |
| H310 | -0.802109261  | 3.241597488   | -7.494574784 |
| H311 | 8.654088497   | -7.642277201  | 3.338411468  |
| H312 | 10.280206404  | -8.264255852  | 0.801266445  |
| H313 | 1.668914865   | 2.853181912   | -2.151496456 |
| H314 | 10.181079384  | -9.686572908  | 3.340709981  |
| H315 | 9.506102013   | -10.070824921 | 1.896925427  |
| H316 | 4.872092587   | -1.761658014  | 3.613228096  |
| H317 | 0.011525652   | 4.666226968   | -2.201833234 |
| H318 | 0.947952079   | 2.069042186   | -6.332764933 |
| H319 | 12.242098219  | -2.692274006  | 0.548456148  |
| H320 | 10.785389551  | 0.147833655   | -0.574535822 |
| H321 | 9.923785905   | -3.068136649  | 1.233926774  |

|       |               |              |              |
|-------|---------------|--------------|--------------|
| H322  | 12.580318962  | -2.433949798 | -0.933445433 |
| H323  | 4.397444920   | 10.120339760 | -0.588018149 |
| H324  | 7.766717003   | -1.004276529 | 2.288535617  |
| H325  | 6.376624353   | -4.358569169 | -0.718074149 |
| H326  | 5.916211442   | 5.489461823  | -2.583699555 |
| H327  | 8.436340988   | -3.884510196 | -2.130972201 |
| H328  | 8.941573269   | 2.259110765  | -4.590719776 |
| H329  | 6.771626643   | 1.500374995  | -3.498685949 |
| H330  | 11.588157354  | -8.419013225 | 1.976878388  |
| H331  | 3.159396724   | -0.496643423 | 4.178694066  |
| H332  | 9.308872351   | -1.724265873 | 4.011949769  |
| H333  | 7.310536150   | -0.129899601 | 3.488911352  |
| H334  | 9.726331073   | -3.727958760 | 5.236857599  |
| H335  | 3.145205468   | -4.408377341 | 5.328684397  |
| H336  | 10.997407074  | -3.310789616 | -4.943838076 |
| H337  | 9.007872459   | -1.028795458 | -3.077811012 |
| H338  | 9.670636342   | -1.680321120 | -1.566782657 |
| H339  | 7.631160459   | -3.002081206 | -3.456312180 |
| H340  | 4.283000885   | 3.824799040  | -3.230187279 |
| H341  | -1.180304179  | 5.248903931  | -4.338660679 |
| H342  | -1.859249999  | 4.419453568  | -6.678265429 |
| H343  | 5.147377006   | -3.055285940 | -0.626109685 |
| H344  | 10.444980357  | -2.547697163 | 3.349435906  |
| H345  | 10.880071614  | -4.146879453 | 1.830501482  |
| H346  | 1.694912313   | -3.488389212 | 5.447803520  |
| H347  | 10.928373138  | 2.126411711  | -2.970939891 |
| H348  | 9.347137873   | 0.508360850  | 0.380359170  |
| H349  | 4.693544862   | 4.149766323  | -4.940894717 |
| H350  | 2.065265146   | 8.940733990  | 1.003044722  |
| H351  | 3.566239601   | -1.401387329 | 7.495330856  |
| H352  | 3.895274031   | 0.260716344  | 6.952579690  |
| H353  | 12.358414995  | 3.410767326  | 0.091389287  |
| H354  | 12.663799380  | 1.935255781  | -0.545929249 |
| H355  | 13.237761991  | -0.969078721 | 2.845761815  |
| H356  | 12.150706704  | -0.206994273 | 0.990410211  |
| H357  | 13.960804123  | 1.676344859  | 3.093795865  |
| H358  | 11.809539757  | -0.429148384 | 3.753009636  |
| H359  | 5.980678466   | 0.487746059  | 8.772444075  |
| H360  | -12.262572007 | 4.164542095  | 5.524387374  |
| H361  | 9.758541331   | -5.549178527 | 7.631177421  |
| H362  | 7.990851161   | -3.413658560 | 7.669994984  |
| H363  | -12.129674167 | 4.909724259  | 2.603538665  |
| H364  | -10.598869833 | 2.405964531  | 3.545248197  |
| H365  | -12.020386534 | 2.405471756  | 2.491455048  |
| H366  | -8.357566251  | 4.094939935  | -2.562591684 |
| H367  | 1.037526350   | -0.701597153 | 0.289901292  |
| H368  | -0.726197941  | 0.287923633  | -1.493308544 |
| Mo369 | 6.117537562   | 0.319610283  | -0.459133462 |
| N370  | 0.631894513   | -5.432115288 | -8.252232957 |
| N371  | -3.012424339  | -5.864589534 | -7.572652359 |
| N372  | -3.596971925  | -8.171259092 | -6.035104647 |
| N373  | -1.254047167  | -8.530417298 | -4.528087053 |
| N374  | -1.279419293  | -6.175855458 | -2.899172060 |
| N375  | -3.675121312  | -6.699529705 | -1.430068626 |
| N376  | -3.178099460  | -9.251064870 | -0.165186714 |
| N377  | -0.547007946  | -9.208049645 | 0.995930307  |
| N378  | -0.055790216  | -6.733730258 | 2.194607801  |
| N379  | -2.425413807  | -5.355021951 | 3.373632105  |
| N380  | -3.842884174  | -7.682433322 | 4.378502866  |
| N381  | 9.684241307   | -9.295939223 | 2.537438950  |
| N382  | 9.104483971   | -6.743614690 | 3.132313604  |
| N383  | 4.467267683   | -2.633351489 | 3.972176499  |
| N384  | 2.612052514   | -3.599820995 | 5.025506551  |
| N385  | 2.618306173   | -1.333494640 | 4.487883894  |
| N386  | 9.497751569   | -4.552598406 | 5.833701993  |
| N387  | -0.751458924  | -0.918957537 | -7.047733452 |
| N388  | 3.647115019   | -1.284951599 | -5.276675757 |
| N389  | -2.937425256  | -0.105244965 | -5.835010494 |
| N390  | -5.451568253  | -1.140871898 | -6.375990485 |
| N391  | -5.846270751  | -3.014788564 | -4.381439695 |
| N392  | -5.893377307  | -1.764927515 | -1.881414112 |
| N393  | -3.488500289  | 1.779413332  | -1.805587616 |
| N394  | -1.739316834  | 0.523119094  | -1.608614309 |

|      |               |               |              |
|------|---------------|---------------|--------------|
| N395 | -8.330316169  | -0.928897923  | -0.857105982 |
| N396 | -12.094511565 | 1.168067371   | -2.621831981 |
| N397 | -13.826824229 | 1.027171753   | -1.241606987 |
| N398 | 3.667314826   | 1.421952935   | 9.395941310  |
| N399 | -0.948655070  | 6.026554186   | 7.853584383  |
| N400 | -2.057624130  | 8.259283930   | 5.322912909  |
| N401 | -2.975998204  | 7.496794191   | 2.799731499  |
| N402 | -4.640499876  | 6.510104593   | -1.814009577 |
| N403 | -5.351166775  | 8.683677596   | -1.303485206 |
| N404 | -6.878678024  | 6.943380715   | -1.376730006 |
| N405 | -3.732174741  | 4.751238896   | 2.980877101  |
| N406 | -5.643010156  | 4.892687208   | 5.044243725  |
| N407 | -8.138718072  | 6.225644656   | 4.804932478  |
| N408 | -7.231434900  | 7.318924576   | 2.022935562  |
| N409 | -10.491654811 | 5.086488753   | 3.893732928  |
| N410 | 9.140962072   | 6.190529110   | -4.696756404 |
| N411 | 5.853863208   | 5.172092536   | -3.557968830 |
| N412 | 3.069436824   | 6.166212689   | -2.869152104 |
| N413 | 3.032143651   | 7.899762823   | -0.577075798 |
| N414 | 4.154021761   | 5.604646077   | -8.007655975 |
| N415 | 1.375244865   | 5.133516590   | -7.541499249 |
| N416 | 11.923247816  | 2.630713032   | -0.409511984 |
| N417 | 7.987425544   | 1.187549026   | -1.751212764 |
| N418 | 8.871164321   | 1.957511181   | -3.622714073 |
| N419 | 12.078313947  | 0.400178037   | 1.807229383  |
| N420 | -1.604493850  | 2.017371433   | 1.001888924  |
| N421 | -0.474654122  | 2.061057902   | 0.971774340  |
| O422 | -1.255273656  | -5.852599878  | -6.123035983 |
| O423 | -4.294475684  | -6.808525942  | -4.346388165 |
| O424 | -2.443147189  | -9.792075453  | -3.038273094 |
| O425 | -0.228187600  | -7.427207466  | -1.317611845 |
| O426 | -2.722093974  | -5.560525815  | 0.292870561  |
| O427 | -4.412176084  | -8.445789178  | 1.579230149  |
| O428 | -1.248469019  | -10.820545850 | 2.473626202  |
| O429 | 1.937215660   | -7.479437363  | 3.062809419  |
| O430 | -0.892515373  | -5.058628240  | 5.043513606  |
| O431 | -3.974106658  | -6.492964492  | 6.308190328  |
| O432 | -3.430083928  | -9.905422223  | 7.161051772  |
| O433 | 10.968693844  | -5.912285594  | 2.042877288  |
| O434 | 8.569638388   | -6.655283349  | 5.919505738  |
| O435 | 9.367978248   | -3.160688639  | 9.153403083  |
| O436 | -3.056679795  | -1.906632427  | -4.418429605 |
| O437 | 2.017228548   | -0.441515989  | -6.617895340 |
| O438 | -6.434229357  | 0.296526139   | -4.897346690 |
| O439 | -5.231111793  | 2.739739115   | -5.044169461 |
| O440 | -7.961354141  | -3.471934178  | -5.156165483 |
| O441 | -5.888345807  | -3.781663549  | -0.804967221 |
| O442 | -7.397485446  | -0.527855743  | 1.189999457  |
| O443 | -10.945497553 | -1.160623434  | 1.504933804  |
| O444 | 5.777803148   | -1.421543194  | 9.469749559  |
| O445 | -2.246392938  | 0.646197035   | 6.941666428  |
| O446 | -3.270489953  | 6.489736601   | 6.095468131  |
| O447 | -4.909414879  | 8.701605186   | 3.095896463  |
| O448 | -5.137794775  | 5.145489689   | 1.215468654  |
| O449 | -6.588899122  | 2.948591377   | 4.287688882  |
| O450 | -3.230560199  | 2.909369339   | 5.377092810  |
| O451 | -8.528110552  | 5.988367107   | 7.051330921  |
| O452 | -11.648441894 | 7.039862380   | 4.133351480  |
| O453 | -9.415660754  | 7.298274054   | 1.348323495  |
| O454 | -13.795239848 | 3.719736560   | 4.251186948  |
| O455 | -7.804323392  | 4.063566644   | -1.757956516 |
| O456 | 7.031288146   | 4.570343788   | -5.437537050 |
| O457 | 3.052321770   | 6.072908666   | -5.162091621 |
| O458 | 1.580267141   | 9.278861943   | -1.653939261 |
| O459 | 3.581274995   | 11.089495879  | 1.010750555  |
| O460 | 1.374346517   | 4.036527898   | -9.542986597 |
| O461 | 5.510143482   | 0.420815460   | -7.069623464 |
| O462 | 6.408408793   | 2.024189015   | -5.807042354 |
| O463 | -1.485579851  | 6.914740273   | -6.423017769 |
| O464 | 11.283495732  | 2.269521965   | 2.812182122  |
| O465 | 13.715360637  | 0.896262432   | 4.963631739  |
| O466 | 4.406760856   | -3.367541375  | -3.144484397 |
| O467 | 5.796168237   | -5.101754447  | -3.104038720 |

|  |                            |              |               |              |
|--|----------------------------|--------------|---------------|--------------|
|  | O468                       | 11.616917558 | -2.676857084  | -2.838826378 |
|  | O469                       | 10.174937503 | -2.942922876  | -4.555648325 |
|  | O470                       | 7.620385547  | -1.073396613  | 0.474860214  |
|  | O471                       | 8.400505600  | -3.186218341  | 0.399452231  |
|  | O472                       | 6.433251803  | -1.210011169  | -1.863227256 |
|  | O473                       | 10.106610978 | -2.265450103  | 4.239895196  |
|  | O474                       | 7.778603159  | -0.961015886  | 3.278921225  |
|  | O475                       | -5.300896796 | 3.813155346   | -2.524148086 |
|  | O476                       | 12.966861505 | -2.355584974  | -0.037266728 |
|  | O477                       | 10.811348093 | -3.167911497  | 1.681899837  |
|  | S478                       | -0.384248164 | 5.558623815   | 3.783348433  |
|  | S479                       | 1.115781118  | 4.438406453   | 0.588250142  |
|  | S480                       | 4.601486278  | 1.520449553   | -1.892518362 |
|  | S481                       | 1.138469611  | 1.967749331   | 3.341183398  |
|  | S482                       | 1.387674011  | 0.289214858   | -0.585201050 |
|  | S483                       | 4.880453323  | 5.008986084   | -0.289961713 |
|  | S484                       | 4.506986748  | -0.905749303  | 0.856243219  |
|  | S485                       | 3.445292769  | 4.709883914   | 3.392469359  |
|  | S486                       | 6.812435136  | 2.017759781   | 1.060141291  |
|  | S487                       | 4.741161677  | 1.096755157   | 4.048876569  |
|  | <b>B 35 (1)</b>            |              |               |              |
|  | TS                         |              |               |              |
|  | Fe( 139)                   | 0.539        | -2.297        |              |
|  | Fe( 140)                   | 0.509        | -2.240        |              |
|  | Fe( 141)                   | 0.539        | -2.453        |              |
|  | Fe( 142)                   | 0.592        | 2.995         |              |
|  | Fe( 143)                   | 0.569        | 3.013         |              |
|  | Fe( 144)                   | 0.508        | 2.228         |              |
|  | Fe( 145)                   | 0.457        | 0.299         |              |
|  | bm22b2n2xd35te 1 53052.307 |              |               |              |
|  | C1                         | -1.681522307 | -5.838204824  | -7.298971318 |
|  | C2                         | -0.748396974 | -5.820692101  | -8.513766701 |
|  | C3                         | -4.012273177 | -5.804540148  | -6.520635679 |
|  | C4                         | -3.976710882 | -6.972697244  | -5.536647709 |
|  | C5                         | -3.479149862 | -9.335382392  | -5.160608173 |
|  | C6                         | -2.343428275 | -9.228878142  | -4.137440176 |
|  | C7                         | -0.169411277 | -8.238868108  | -3.593900105 |
|  | C8                         | -0.557173693 | -7.241726697  | -2.498720953 |
|  | C9                         | -1.779663789 | -5.216847663  | -1.909149405 |
|  | C10                        | -2.776040642 | -5.832806690  | -0.915871494 |
|  | C11                        | -4.658376549 | -7.322265252  | -0.551369593 |
|  | C12                        | -4.065329200 | -8.379521403  | 0.389002107  |
|  | C13                        | -2.680504513 | -10.386878005 | 0.589299940  |
|  | C14                        | -1.432947884 | -10.146633511 | 1.450447416  |
|  | C15                        | 0.738664055  | -9.009737397  | 1.640087249  |
|  | C16                        | 0.927355352  | -7.677101627  | 2.371574980  |
|  | C17                        | -0.024565789 | -5.426408757  | 2.809573488  |
|  | C18                        | -1.149720181 | -5.286689920  | 3.851136308  |
|  | C19                        | -0.022081252 | -4.294312175  | 1.748105551  |
|  | C20                        | -0.209828385 | -2.914675382  | 2.386628042  |
|  | C21                        | 1.259591310  | -4.347178756  | 0.910176484  |
|  | C22                        | -3.576145363 | -5.238515406  | 4.274142571  |
|  | C23                        | -3.815366713 | -6.524759262  | 5.086397158  |
|  | C24                        | -4.831977799 | -4.788192939  | 3.490852497  |
|  | C25                        | -6.071769810 | -4.770955511  | 4.392574423  |
|  | C26                        | -4.610457795 | -3.409293975  | 2.857032123  |
|  | C27                        | -4.145392409 | -8.926028183  | 5.079581577  |
|  | C28                        | -3.171436811 | -9.200568968  | 6.208213524  |
|  | C29                        | 10.508771947 | -8.283497708  | 1.880995239  |
|  | C30                        | 10.212063303 | -6.863115110  | 2.368533007  |
|  | C31                        | 8.613065565  | -5.544282407  | 3.769442625  |
|  | C32                        | 8.893768713  | -5.647426266  | 5.282992776  |
|  | C33                        | 7.112244903  | -5.372446018  | 3.477722359  |
|  | C34                        | 6.501209219  | -4.100511378  | 4.073016843  |
|  | C35                        | 5.085650092  | -3.882726993  | 3.534560453  |
|  | C36                        | 3.262837077  | -2.490542932  | 4.538267551  |
|  | C37                        | 9.885055962  | -4.540330305  | 7.229702704  |
|  | C38                        | 9.019558010  | -3.631307111  | 8.077555261  |
|  | C39                        | -1.073850415 | -1.662567379  | -5.823850272 |
|  | C40                        | -2.453888059 | -1.247370853  | -5.290122052 |
|  | C41                        | -0.044539608 | -1.398917955  | -4.700632931 |
|  | C42                        | 1.346506208  | -2.035783756  | -4.885137329 |
|  | C43                        | 2.353768730  | -1.183966649  | -5.656300547 |
|  | C44                        | -4.079650981 | 0.585161753   | -5.261023166 |
|  | C45                        | -5.424773058 | -0.099175787  | -5.514856324 |
|  | C46                        | -4.152100077 | 2.066513269   | -5.689095027 |
|  | C47                        | -6.621641675 | -1.987385511  | -6.494639220 |
|  | C48                        | -6.867549165 | -2.902955968  | -5.286018601 |
|  | C49                        | -5.953986342 | -3.855140959  | -3.210078994 |
|  | C50                        | -5.907754210 | -3.137802315  | -1.862866864 |
|  | C51                        | -5.890966244 | -1.000430322  | -0.648213114 |

|      |               |              |              |
|------|---------------|--------------|--------------|
| C52  | -7.289974308  | -0.846677161 | -0.005939763 |
| C53  | -5.378313771  | 0.432964027  | -0.856207796 |
| C54  | -3.945160154  | 0.598044192  | -1.246905266 |
| C55  | -2.817627321  | -0.178047263 | -1.118443474 |
| C56  | -2.195867697  | 1.761089144  | -2.006338423 |
| C57  | -9.683181486  | -0.537986494 | -0.489123836 |
| C58  | -10.216387942 | -1.502918156 | 0.564415870  |
| C59  | -10.574546849 | -0.596936520 | -1.758047183 |
| C60  | -11.855161143 | 0.181736549  | -1.699875957 |
| C61  | -12.934418812 | 0.079666466  | -0.841941146 |
| C62  | -13.292513040 | 1.666530210  | -2.345777541 |
| C63  | 3.831154390   | -0.011058118 | 9.108491495  |
| C64  | 5.310435537   | -0.348776584 | 9.132283778  |
| C65  | 3.322632485   | -0.351729504 | 7.683598951  |
| C66  | 1.844276383   | -0.101730525 | 7.505407224  |
| C67  | 0.891416153   | -1.087914874 | 7.823782629  |
| C68  | 1.376316885   | 1.125227687  | 7.004412831  |
| C69  | -0.477628121  | -0.863739048 | 7.640610505  |
| C70  | 0.013941831   | 1.367772185  | 6.826795169  |
| C71  | -0.913714048  | 0.369202182  | 7.140829873  |
| C72  | -0.868026673  | 6.434499980  | 6.462806816  |
| C73  | -2.173182763  | 7.056658515  | 5.951762049  |
| C74  | -0.498794201  | 5.208212412  | 5.613000514  |
| C75  | -3.202926863  | 8.950510975  | 4.771466440  |
| C76  | -3.765917758  | 8.355048097  | 3.480231999  |
| C77  | -3.407199822  | 6.795474262  | 1.604713620  |
| C78  | -4.158611892  | 5.484751408  | 1.921864378  |
| C79  | -2.199302167  | 6.581202298  | 0.672957184  |
| C80  | -2.461239563  | 5.923699154  | -0.686412611 |
| C81  | -3.196790908  | 6.769982433  | -1.743850929 |
| C82  | -5.614506922  | 7.390719858  | -1.537050789 |
| C83  | -4.427470481  | 3.528034086  | 3.357802667  |
| C84  | -5.659031945  | 3.772951234  | 4.253619673  |
| C85  | -3.525768483  | 2.498813405  | 4.050387747  |
| C86  | -6.512393389  | 4.987942106  | 6.198232557  |
| C87  | -7.813348104  | 5.776374366  | 6.056385608  |
| C88  | -9.262945281  | 7.119128935  | 4.579857809  |
| C89  | -10.575977664 | 6.407992652  | 4.183672853  |
| C90  | -8.912353093  | 8.215286708  | 3.545094055  |
| C91  | -8.554141455  | 7.609712192  | 2.192628318  |
| C92  | -11.613054860 | 4.321780759  | 3.397656511  |
| C93  | -12.637624551 | 4.054141419  | 4.496012939  |
| C94  | -11.131192519 | 2.982465686  | 2.778195268  |
| C95  | -10.247047807 | 3.189426106  | 1.569337706  |
| C96  | -10.812398398 | 3.350885292  | 0.295652394  |
| C97  | -8.850490552  | 3.276008571  | 1.689295748  |
| C98  | -10.017912102 | 3.618407144  | -0.822306528 |
| C99  | -8.040543162  | 3.565156397  | 0.586954301  |
| C100 | -8.637557175  | 3.739213596  | -0.659036500 |
| C101 | 8.216800856   | 5.701187580  | -3.662667053 |
| C102 | 6.973240832   | 5.109489164  | -4.307387601 |
| C103 | 4.566087658   | 4.604527305  | -3.969461074 |
| C104 | 3.479751784   | 5.680361951  | -4.074756657 |
| C105 | 2.072478637   | 7.229176071  | -2.794593102 |
| C106 | 2.196396659   | 8.205386681  | -1.627926118 |
| C107 | 3.038165759   | 8.747146519  | 0.586755121  |
| C108 | 3.763678331   | 10.054680460 | 0.346798897  |
| C109 | 3.524007478   | 4.349822275  | -8.476250473 |
| C110 | 2.000028486   | 4.491567147  | -8.576530350 |
| C111 | 3.875223901   | 3.066065915  | -7.687373691 |
| C112 | 5.349412681   | 2.669920170  | -7.897080046 |
| C113 | 5.763892154   | 1.601455564  | -6.911430944 |
| C114 | -0.069930679  | 5.258546482  | -7.513322549 |
| C115 | -0.442492398  | 6.641351139  | -7.013508393 |
| C116 | -0.818805557  | 4.095724360  | -6.813992115 |
| C117 | -0.204697157  | 3.705179132  | -5.491467907 |
| C118 | -0.484445972  | 4.424992104  | -4.315825887 |
| C119 | 0.733183504   | 2.659393270  | -5.429005266 |
| C120 | 0.182754975   | 4.120843292  | -3.123519412 |
| C121 | 1.402380112   | 2.357891187  | -4.236576172 |
| C122 | 1.135855648   | 3.096255057  | -3.080009664 |
| C123 | 10.872390864  | 2.072633184  | 0.430617468  |
| C124 | 11.413553774  | 1.586052481  | 1.784619813  |

|       |              |               |              |
|-------|--------------|---------------|--------------|
| C125  | 10.130861666 | 0.958915220   | -0.327720533 |
| C126  | 9.410449765  | 1.380439587   | -1.572748767 |
| C127  | 9.966784850  | 1.869839252   | -2.738890248 |
| C128  | 7.793556157  | 1.560004455   | -3.029178968 |
| C129  | 12.611540860 | -0.092251584  | 3.074023363  |
| C130  | 13.498741455 | 0.924419870   | 3.758063121  |
| C131  | 5.354585391  | -3.964317855  | -2.556046180 |
| C132  | 5.972479037  | -3.512772576  | -1.264081202 |
| C133  | 7.072637742  | -2.390774659  | -1.466327360 |
| C134  | 8.152113704  | -2.905703396  | -2.462018341 |
| C135  | 9.361451945  | -1.963452082  | -2.579916166 |
| C136  | 10.531828447 | -2.565424675  | -3.308078176 |
| C137  | 7.771726082  | -2.227239750  | -0.081485348 |
| C138  | 3.508669242  | 2.223443489   | 1.090268127  |
| Fe139 | 5.019668402  | 2.786142102   | -0.125552560 |
| Fe140 | 1.512753835  | 2.146314373   | 1.031731940  |
| Fe141 | 3.246479474  | 2.500567282   | 3.062932416  |
| Fe142 | 3.268359223  | 4.248885769   | 1.085229145  |
| Fe143 | 1.202922855  | 4.142504033   | 2.878982406  |
| Fe144 | 4.970135902  | 1.049335151   | 1.826138271  |
| Fe145 | 3.490311070  | 0.789045201   | -0.174547875 |
| H146  | 0.996278281  | -5.980360407  | -7.470376548 |
| H147  | 0.667450818  | -4.456513114  | -7.954074933 |
| H148  | -3.319769150 | -5.766283557  | -8.542369850 |
| H149  | -1.176437054 | -5.164806643  | -9.287996803 |
| H150  | -0.761486373 | -6.839293927  | -8.938466378 |
| H151  | -3.883052839 | -4.892935725  | -5.920359343 |
| H152  | -3.362759928 | -8.253184801  | -7.017512451 |
| H153  | -5.005820288 | -5.776299878  | -6.988569143 |
| H154  | -3.308055035 | -10.221493149 | -5.785554179 |
| H155  | -1.296858079 | -7.974533017  | -5.384849472 |
| H156  | -4.406924630 | -9.486615007  | -4.593085644 |
| H157  | -0.949566012 | -4.812609865  | -1.314893506 |
| H158  | -1.476646376 | -6.016940787  | -3.886905502 |
| H159  | 0.682892071  | -7.846368179  | -4.164904045 |
| H160  | -5.141776965 | -6.562147180  | 0.076285856  |
| H161  | -3.740913227 | -6.849034382  | -2.439850621 |
| H162  | 0.144508331  | -9.163454606  | -3.094057321 |
| H163  | -2.260448808 | -4.386418965  | -2.446089930 |
| H164  | -2.987775295 | -9.213571418  | -1.170616217 |
| H165  | -5.425475313 | -7.801249338  | -1.176074881 |
| H166  | 1.393072894  | -5.329888270  | 0.434039656  |
| H167  | 1.233502621  | -3.585639282  | 0.115975588  |
| H168  | 2.145399355  | -4.144657073  | 1.532396550  |
| H169  | -0.879638032 | -4.478937624  | 1.081675467  |
| H170  | -2.443310193 | -11.193876518 | -0.119630149 |
| H171  | -3.754723404 | -3.402533932  | 2.167564298  |
| H172  | -3.850205096 | -7.702966218  | 3.363390631  |
| H173  | -6.303157473 | -5.764590680  | 4.802966946  |
| H174  | -0.234004615 | -2.140934030  | 1.604551413  |
| H175  | 0.617654528  | -2.666035814  | 3.066760084  |
| H176  | 3.322261822  | -0.684637469  | 9.823442451  |
| H177  | -5.501488861 | -3.110959163  | 2.286044574  |
| H178  | -6.944412641 | -4.426977980  | 3.817866409  |
| H179  | -4.433741037 | -2.652347529  | 3.637989740  |
| H180  | -5.928033136 | -4.079840733  | 5.238569137  |
| H181  | -5.004402606 | -5.520101771  | 2.681037560  |
| H182  | -3.330561827 | -4.475294445  | 5.026872013  |
| H183  | -2.593553794 | -5.469047827  | 2.375065654  |
| H184  | -1.151706428 | -2.842128130  | 2.950061928  |
| H185  | -2.599398424 | 2.386503441   | 3.464241368  |
| H186  | -4.067423009 | 1.538035814   | 4.039825545  |
| H187  | -2.883134099 | 2.137153882   | 5.864714669  |
| H188  | -2.790294264 | -0.129185781  | 7.149479827  |
| H189  | -0.327785006 | 2.315201346   | 6.409487057  |
| H190  | 2.091611089  | 1.895229111   | 6.707622049  |
| H191  | 1.220853331  | -2.052464955  | 8.219872816  |
| H192  | -0.818576002 | -6.986760214  | 1.567718052  |
| H193  | 1.550123929  | -9.089126784  | 0.900799221  |
| H194  | 0.881549821  | -9.806614020  | 2.381725756  |
| H195  | -0.678983856 | -8.792244826  | 0.069118756  |
| H196  | -3.461343638 | -10.746493897 | 1.271022776  |
| H197  | -1.200872606 | -1.649523722  | 7.874564066  |

|      |               |              |              |
|------|---------------|--------------|--------------|
| H198 | 0.908175990   | -5.385067829 | 3.386968352  |
| H199 | -5.170334257  | -8.954600756 | 5.484968266  |
| H200 | -4.042967609  | -9.749668225 | 4.354956716  |
| H201 | -2.164829387  | -8.735353266 | 6.086908431  |
| H202 | 10.940447514  | -4.251757340 | 7.348900531  |
| H203 | 4.346354372   | -0.725119013 | -5.744762377 |
| H204 | 6.539362539   | -5.484719312 | -2.506623459 |
| H205 | 5.474901974   | 2.267500961  | -8.912458068 |
| H206 | 5.999450352   | 3.551342431  | -7.792168757 |
| H207 | 3.234221887   | 2.230567645  | -8.010109804 |
| H208 | 0.301195166   | 7.433629037  | -7.264273843 |
| H209 | 3.838385201   | 4.194888539  | -9.519684093 |
| H210 | 0.053205248   | -0.308891411 | -4.572544781 |
| H211 | 1.258295023   | -2.999505404 | -5.416723984 |
| H212 | 1.916572220   | 5.409847841  | -6.716347906 |
| H213 | -0.381162711  | 5.257964906  | -8.576931365 |
| H214 | 4.034578134   | 5.715450117  | -6.999263393 |
| H215 | 3.914114901   | -1.822227044 | -4.434757326 |
| H216 | 3.660135209   | 3.234909959  | -6.620766492 |
| H217 | 5.161222970   | 5.552840720  | -8.188675761 |
| H218 | -0.980658058  | -1.484964113 | -7.879476257 |
| H219 | -0.477531474  | -1.794548067 | -3.769849956 |
| H220 | 6.554033825   | 3.017617205  | -5.788066890 |
| H221 | 1.762541045   | -2.275895771 | -3.895843493 |
| H222 | -5.273612116  | -1.531737986 | 0.090075601  |
| H223 | -2.681266654  | -1.178096916 | -0.722787577 |
| H224 | -6.916947945  | -4.381920962 | -3.261437971 |
| H225 | -4.936334917  | -2.569542443 | -4.571937534 |
| H226 | -8.154465552  | -1.211050029 | -1.830557838 |
| H227 | -13.130953547 | -0.552490797 | 0.016316239  |
| H228 | -9.897601687  | -2.563161331 | 0.407921824  |
| H229 | -10.757983064 | -1.655100201 | -2.014816043 |
| H230 | -9.683293403  | 0.477386866  | -0.065394094 |
| H231 | -13.804624129 | 2.464218392  | -2.876500629 |
| H232 | -5.543573010  | 0.966412037  | 0.0944444083 |
| H233 | -6.013233981  | 0.932558367  | -1.606699474 |
| H234 | -14.739526623 | 1.225060032  | -0.848332215 |
| H235 | -9.989731691  | -0.169646563 | -2.587496439 |
| H236 | -5.885558960  | -1.288668410 | -2.785262257 |
| H237 | -5.166522999  | -4.622737445 | -3.207270143 |
| H238 | -7.526184477  | -1.378614982 | -6.621973942 |
| H239 | -1.578286308  | 2.562337102  | -2.405481353 |
| H240 | -6.510504120  | -2.615523510 | -7.387867106 |
| H241 | 3.788366663   | 1.582740465  | 10.396886849 |
| H242 | 2.695508287   | 1.690903207  | 9.184720456  |
| H243 | -2.796269845  | 4.957660455  | 3.392550508  |
| H244 | -4.812110379  | 3.067876488  | 2.436318025  |
| H245 | -4.760057153  | 5.413245829  | 5.098132870  |
| H246 | -4.160822491  | 2.607700186  | -2.015328460 |
| H247 | -5.289822290  | 3.573664046  | -3.470916903 |
| H248 | -6.232482907  | 3.705305809  | -2.193284974 |
| H249 | -3.215605655  | 2.568740992  | -5.408475841 |
| H250 | -4.275893540  | 2.134730158  | -6.782800100 |
| H251 | -8.083032747  | 8.816633939  | 3.946267660  |
| H252 | -9.792898875  | 8.858120716  | 3.421262109  |
| H253 | -6.484058063  | 7.800710329  | 2.544989416  |
| H254 | -6.953601596  | 6.846553592  | 1.168846530  |
| H255 | -6.131986292  | 9.333941297  | -1.159020720 |
| H256 | -2.793236028  | 6.550730306  | -2.743298489 |
| H257 | -10.474240021 | 3.725122662  | -1.810001666 |
| H258 | -8.364006873  | 3.111706876  | 2.654787994  |
| H259 | -7.117087413  | 5.968017439  | -1.494439651 |
| H260 | -1.451457781  | 5.966146012  | 1.197963728  |
| H261 | -2.076069336  | 7.193956408  | 3.228363411  |
| H262 | -2.980887710  | 4.961211796  | -0.557620978 |
| H263 | -4.588893720  | -1.381206053 | -6.851129575 |
| H264 | -2.927792090  | 9.995862492  | 4.572632061  |
| H265 | -2.305542506  | 0.307184756  | -6.544788664 |
| H266 | -1.733696431  | 7.568011948  | 0.511759961  |
| H267 | -6.963128020  | 3.686882719  | 0.710553803  |
| H268 | -5.962506667  | 2.079609112  | -4.948675432 |
| H269 | -4.028629364  | 8.953653707  | 5.495295126  |
| H270 | -4.518744769  | 9.118747061  | -1.724522270 |



|      |               |               |              |
|------|---------------|---------------|--------------|
| H271 | -7.651418925  | 7.617398017   | -1.460734399 |
| H272 | 0.255810254   | -0.708166628  | -7.068280528 |
| H273 | -1.132523966  | -2.757138828  | -5.972598503 |
| H274 | -11.894227173 | 3.268049972   | 0.166950019  |
| H275 | -3.977508984  | 0.555309474   | -4.163462126 |
| H276 | -4.154966676  | 7.436233803   | 1.117175560  |
| H277 | -3.007766311  | 7.835068351   | -1.563693891 |
| H278 | -1.469974638  | 5.681664922   | -1.094787102 |
| H279 | -4.919251283  | 5.550005614   | -2.035973510 |
| H280 | -6.794913595  | 3.976521416   | 6.527027257  |
| H281 | -7.433811566  | 6.113429322   | 4.067411347  |
| H282 | -9.481712962  | 7.609667331   | 5.539752795  |
| H283 | -5.949608212  | 5.463307897   | 7.012538086  |
| H284 | -9.571649943  | 4.641379341   | 3.988011752  |
| H285 | 7.928693235   | 6.524499968   | -2.992002908 |
| H286 | 8.632960847   | 4.896913939   | -3.020290057 |
| H287 | 10.157431920  | 2.871961101   | 0.673119427  |
| H288 | 10.052935233  | 6.358910047   | -4.248770031 |
| H289 | 9.283100176   | 5.454768750   | -5.376812379 |
| H290 | 0.467887915   | 4.826787004   | 5.965608048  |
| H291 | -1.815640123  | 5.449446761   | 7.976081243  |
| H292 | -1.128816303  | 8.660891156   | 5.204351430  |
| H293 | -1.268483462  | 4.436210889   | 5.751757785  |
| H294 | -1.123408531  | 6.849386536   | 8.456585839  |
| H295 | 3.575345166   | 8.208449205   | 1.383497881  |
| H296 | -0.056658517  | 7.174979393   | 6.385681150  |
| H297 | 6.576061786   | -6.262731111  | 3.846667454  |
| H298 | 9.166816916   | -4.699196100  | 3.343257432  |
| H299 | 3.510413755   | 6.996369528   | -0.535535885 |
| H300 | 1.935697222   | -1.095238190  | 5.195360535  |
| H301 | 2.114454853   | 7.817685082   | -3.720045818 |
| H302 | 2.145681927   | 1.558402237   | -4.213546144 |
| H303 | 1.053057554   | 6.809968233   | -2.739399279 |
| H304 | 4.433154562   | -4.721077075  | 3.812135290  |
| H305 | 3.405851895   | 5.687130996   | -2.035449607 |
| H306 | 5.107385398   | -3.846968497  | 2.432837780  |
| H307 | 7.002920947   | -5.353595692  | 2.381062367  |
| H308 | 7.111385046   | -3.223479746  | 3.807815495  |
| H309 | 6.467828781   | -4.156924603  | 5.173210180  |
| H310 | -0.804632081  | 3.235544233   | -7.499345035 |
| H311 | 8.657282617   | -7.655608762  | 3.336325507  |
| H312 | 10.308029154  | -8.279408359  | 0.798923483  |
| H313 | 1.666012697   | 2.891444549   | -2.147751808 |
| H314 | 10.174258553  | -9.712717425  | 3.326637100  |
| H315 | 9.505657088   | -10.080492943 | 1.877585854  |
| H316 | 4.906694591   | -1.764981681  | 3.643583616  |
| H317 | -0.010689867  | 4.687491692   | -2.210289247 |
| H318 | 0.953344108   | 2.073617652   | -6.324312986 |
| H319 | 12.249321525  | -2.698949054  | 0.547588325  |
| H320 | 10.859948613  | 0.176622709   | -0.604973987 |
| H321 | 9.942625760   | -3.062345405  | 1.245460754  |
| H322 | 12.586614223  | -2.456211390  | -0.938372532 |
| H323 | 4.426750005   | 10.069835251  | -0.551005133 |
| H324 | 7.787556286   | -1.004567728  | 2.278123364  |
| H325 | 6.420734920   | -4.356252531  | -0.719069551 |
| H326 | 5.904452672   | 5.492439910   | -2.595029877 |
| H327 | 8.499326148   | -3.887968265  | -2.104736801 |
| H328 | 9.005864737   | 2.280154255   | -4.609298006 |
| H329 | 6.830136948   | 1.523967577   | -3.523100032 |
| H330 | 11.595009742  | -8.433482368  | 1.994974316  |
| H331 | 3.210037883   | -0.464534447  | 4.190049967  |
| H332 | 9.314059476   | -1.729523673  | 4.021687315  |
| H333 | 7.311360024   | -0.143462690  | 3.479660050  |
| H334 | 9.730554620   | -3.740347952  | 5.234892629  |
| H335 | 3.125186074   | -4.375385654  | 5.356027405  |
| H336 | 11.048077003  | -3.317023478  | -4.965361594 |
| H337 | 9.054970155   | -1.046483676  | -3.104300125 |
| H338 | 9.729683282   | -1.675825067  | -1.589618607 |
| H339 | 7.693748459   | -3.041072376  | -3.452342039 |
| H340 | 4.276744556   | 3.825970578   | -3.245333981 |
| H341 | -1.208955818  | 5.242202069   | -4.348234304 |
| H342 | -1.865204075  | 4.415223784   | -6.688147326 |
| H343 | 5.190838089   | -3.053253286  | -0.643466196 |

|       |               |              |              |
|-------|---------------|--------------|--------------|
| H344  | 10.454022994  | -2.552197372 | 3.366016024  |
| H345  | 10.892962467  | -4.146161688 | 1.840463787  |
| H346  | 1.693618828   | -3.425003684 | 5.475882231  |
| H347  | 10.988293768  | 2.136129917  | -2.986099124 |
| H348  | 9.403875915   | 0.486389623  | 0.345327733  |
| H349  | 4.688971863   | 4.149920069  | -4.954749714 |
| H350  | 2.024777049   | 8.961485387  | 0.958916791  |
| H351  | 3.554297161   | -1.412019315 | 7.500278241  |
| H352  | 3.890310283   | 0.248289061  | 6.954388651  |
| H353  | 12.355854819  | 3.457357822  | 0.130543607  |
| H354  | 12.702496618  | 1.994848279  | -0.515764441 |
| H355  | 13.234874093  | -0.973877886 | 2.853769978  |
| H356  | 12.152765134  | -0.207050171 | 0.996530537  |
| H357  | 13.994954417  | 1.655318249  | 3.075388759  |
| H358  | 11.814896399  | -0.414307696 | 3.763236104  |
| H359  | 5.968468521   | 0.465436261  | 8.743063525  |
| H360  | -12.255414949 | 4.161341058  | 5.538182634  |
| H361  | 9.763814138   | -5.561877878 | 7.629667794  |
| H362  | 7.997781504   | -3.431780272 | 7.672252479  |
| H363  | -12.122011604 | 4.913568068  | 2.620334726  |
| H364  | -10.603499525 | 2.397946844  | 3.548745438  |
| H365  | -12.029483265 | 2.413246854  | 2.500017911  |
| H366  | -8.360899160  | 4.098626114  | -2.554631863 |
| H367  | 1.026461836   | -0.705068663 | 0.329980411  |
| H368  | -0.738700390  | 0.337448850  | -1.480954130 |
| Mo369 | 6.133307536   | 0.319775967  | -0.483791108 |
| N370  | 0.627790050   | -5.433621022 | -8.253551003 |
| N371  | -3.014489690  | -5.876980627 | -7.578538672 |
| N372  | -3.596570124  | -8.175770153 | -6.030282932 |
| N373  | -1.252230015  | -8.520853865 | -4.525304195 |
| N374  | -1.287330724  | -6.167235750 | -2.895487538 |
| N375  | -3.681772825  | -6.699640579 | -1.429719579 |
| N376  | -3.182668546  | -9.250058451 | -0.166303601 |
| N377  | -0.543389390  | -9.220875246 | 0.989327410  |
| N378  | -0.050953064  | -6.750725768 | 2.193769422  |
| N379  | -2.426030423  | -5.373955183 | 3.379271368  |
| N380  | -3.853968342  | -7.687168666 | 4.385789028  |
| N381  | 9.684143425   | -9.311908641 | 2.525024331  |
| N382  | 9.105406739   | -6.757042779 | 3.127026163  |
| N383  | 4.487035433   | -2.627720829 | 4.006722527  |
| N384  | 2.607655540   | -3.557056904 | 5.052497619  |
| N385  | 2.656236164   | -1.294710816 | 4.503807188  |
| N386  | 9.504278045   | -4.567176120 | 5.830336927  |
| N387  | -0.757627579  | -0.927066182 | -7.052806603 |
| N388  | 3.632053273   | -1.257965382 | -5.238413036 |
| N389  | -2.939455411  | -0.099124030 | -5.837084938 |
| N390  | -5.454436857  | -1.131743659 | -6.377862014 |
| N391  | -5.845200602  | -3.013154392 | -4.387975955 |
| N392  | -5.893976881  | -1.768046329 | -1.886269056 |
| N393  | -3.521587855  | 1.796823485  | -1.806449848 |
| N394  | -1.755889562  | 0.563322853  | -1.601812173 |
| N395  | -8.332444832  | -0.924562865 | -0.871045871 |
| N396  | -12.093714332 | 1.175585820  | -2.635940237 |
| N397  | -13.831969833 | 1.035675881  | -1.264922458 |
| N398  | 3.658314800   | 1.414525453  | 9.396292919  |
| N399  | -0.972118514  | 6.022738070  | 7.871122865  |
| N400  | -2.056283449  | 8.265367866  | 5.333435487  |
| N401  | -2.966501945  | 7.500459195  | 2.804737570  |
| N402  | -4.641945125  | 6.519688474  | -1.803638489 |
| N403  | -5.358927807  | 8.701261472  | -1.339895680 |
| N404  | -6.883187076  | 6.956801924  | -1.388179286 |
| N405  | -3.721912538  | 4.751198546  | 2.980996766  |
| N406  | -5.640263683  | 4.892041573  | 5.034995373  |
| N407  | -8.131846216  | 6.223221715  | 4.806083682  |
| N408  | -7.232021352  | 7.330261524  | 2.021839144  |
| N409  | -10.483765571 | 5.084116524  | 3.906450215  |
| N410  | 9.142574853   | 6.195727618  | -4.684048737 |
| N411  | 5.846802495   | 5.175064555  | -3.569858189 |
| N412  | 3.061308006   | 6.168940131  | -2.887812265 |
| N413  | 3.004514492   | 7.889831237  | -0.586041652 |
| N414  | 4.155099800   | 5.591984891  | -8.012324405 |
| N415  | 1.376436673   | 5.117602596  | -7.537759557 |
| N416  | 11.945419577  | 2.674035533  | -0.386110362 |

|          |               |                      |              |
|----------|---------------|----------------------|--------------|
| N417     | 8.040837022   | 1.201129376          | -1.773547571 |
| N418     | 8.931910441   | 1.974263615          | -3.642770878 |
| N419     | 12.084445438  | 0.400629706          | 1.812687351  |
| N420     | -1.915266921  | 2.251636722          | 1.113229385  |
| N421     | -0.817927985  | 2.107992794          | 0.955864737  |
| O422     | -1.259817081  | -5.864740740         | -6.127440218 |
| O423     | -4.296783339  | -6.807277334         | -4.347752371 |
| O424     | -2.429677397  | -9.791398867         | -3.033941428 |
| O425     | -0.233928692  | -7.417627502         | -1.313527692 |
| O426     | -2.747306936  | -5.540254395         | 0.290106239  |
| O427     | -4.419835889  | -8.448442963         | 1.577970985  |
| O428     | -1.261520341  | -10.815072945        | 2.478464453  |
| O429     | 1.944126325   | -7.496284599         | 3.057005754  |
| O430     | -0.889368414  | -5.096948202         | 5.049377104  |
| O431     | -3.968321275  | -6.500898573         | 6.318964593  |
| O432     | -3.434113335  | -9.928035810         | 7.153693260  |
| O433     | 10.966313211  | -5.924381752         | 2.035271930  |
| O434     | 8.575724466   | -6.669655941         | 5.915889476  |
| O435     | 9.387887332   | -3.159089154         | 9.140941337  |
| O436     | -3.067667573  | -1.900397193         | -4.422053481 |
| O437     | 2.013568281   | -0.468770090         | -6.626048022 |
| O438     | -6.433571891  | 0.298177922          | -4.889321866 |
| O439     | -5.231141076  | 2.743486806          | -5.025264062 |
| O440     | -7.949446713  | -3.491475389         | -5.178100462 |
| O441     | -5.905826279  | -3.784227531         | -0.812016689 |
| O442     | -7.412206757  | -0.564738796         | 1.189786674  |
| O443     | -10.960941638 | -1.186217468         | 1.475924120  |
| O444     | 5.769327410   | -1.415818341         | 9.512883340  |
| O445     | -2.248434828  | 0.649486069          | 6.923939761  |
| O446     | -3.274640342  | 6.495559352          | 6.095791228  |
| O447     | -4.903967716  | 8.699874877          | 3.100010415  |
| O448     | -5.130175171  | 5.152387125          | 1.218737646  |
| O449     | -6.586400643  | 2.950793100          | 4.271636020  |
| O450     | -3.244893452  | 2.913854019          | 5.388836621  |
| O451     | -8.530406432  | 5.962147808          | 7.047987262  |
| O452     | -11.641858776 | 7.037298840          | 4.137215914  |
| O453     | -9.419753960  | 7.301461147          | 1.358943148  |
| O454     | -13.788494589 | 3.721849427          | 4.264886796  |
| O455     | -7.808288048  | 4.069630236          | -1.749189591 |
| O456     | 7.035834188   | 4.570398238          | -5.441684057 |
| O457     | 3.046457860   | 6.073122360          | -5.180100545 |
| O458     | 1.524236263   | 9.251465902          | -1.649268130 |
| O459     | 3.674488500   | 11.017615335         | 1.091458033  |
| O460     | 1.372338744   | 4.035850393          | -9.547180568 |
| O461     | 5.502405030   | 0.410401201          | -7.054526981 |
| O462     | 6.410732738   | 2.019607880          | -5.806408054 |
| O463     | -1.478285140  | 6.911919598          | -6.422975158 |
| O464     | 11.313440199  | 2.282401694          | 2.811739121  |
| O465     | 13.730744647  | 0.913753799          | 4.958824650  |
| O466     | 4.470569701   | -3.382988481         | -3.168793366 |
| O467     | 5.852748203   | -5.122573385         | -3.098722268 |
| O468     | 11.662805965  | -2.713602682         | -2.850905381 |
| O469     | 10.227616564  | -2.943210998         | -4.578021986 |
| O470     | 7.638241508   | -1.066786847         | 0.468983844  |
| O471     | 8.438016552   | -3.173224035         | 0.402039496  |
| O472     | 6.484904017   | -1.212571093         | -1.883719914 |
| O473     | 10.109733236  | -2.271122077         | 4.254590268  |
| O474     | 7.795716294   | -0.965077347         | 3.269135526  |
| O475     | -5.302139415  | 3.820911040          | -2.506987592 |
| O476     | 12.972740793  | -2.368276348         | -0.042806799 |
| O477     | 10.827930984  | -3.166419873         | 1.698446339  |
| S478     | -0.382368089  | 5.580727588          | 3.801197712  |
| S479     | 1.059700062   | 4.385389908          | 0.553607022  |
| S480     | 4.607314716   | 1.501808622          | -1.928699920 |
| S481     | 1.083246091   | 1.949436680          | 3.307801613  |
| S482     | 1.345519700   | 0.305422775          | -0.533613097 |
| S483     | 4.850007826   | 5.002900025          | -0.322284292 |
| S484     | 4.504836097   | -0.895301178         | 0.819867305  |
| S485     | 3.394395928   | 4.702260157          | 3.339875067  |
| S486     | 6.805687906   | 2.034059731          | 1.028235119  |
| S487     | 4.726807975   | 1.128317910          | 4.021399280  |
| B 35 (1) |               | bm22b2n2xd35td.car_4 |              |

|                       |     |               |               |              |
|-----------------------|-----|---------------|---------------|--------------|
| dissociated           | C1  | -1.675777466  | -5.810535644  | -7.282863552 |
| Fe( 139) 0.546 -2.337 | C2  | -0.744282872  | -5.788186467  | -8.500184455 |
| Fe( 140) 0.497 -2.029 | C3  | -4.008571501  | -5.788784510  | -6.507377797 |
| Fe( 141) 0.532 -2.399 | C4  | -3.974321628  | -6.966219564  | -5.533486135 |
| Fe( 142) 0.583 2.934  | C5  | -3.482485571  | -9.332655863  | -5.176592685 |
| Fe( 143) 0.563 2.973  | C6  | -2.352357405  | -9.232371784  | -4.146617748 |
| Fe( 144) 0.511 2.259  | C7  | -0.169888302  | -8.262262884  | -3.598798356 |
| Fe( 145) 0.442 0.230  | C8  | -0.549229155  | -7.259453031  | -2.505290844 |
|                       | C9  | -1.760985202  | -5.228624111  | -1.913306525 |
|                       | C10 | -2.753625934  | -5.844124396  | -0.916922860 |
|                       | C11 | -4.646398344  | -7.318495319  | -0.551533084 |
|                       | C12 | -4.054470657  | -8.376632607  | 0.390593169  |
|                       | C13 | -2.670785982  | -10.385065037 | 0.594927991  |
|                       | C14 | -1.424919262  | -10.140066330 | 1.456504500  |
|                       | C15 | 0.733470004   | -8.979008750  | 1.652347462  |
|                       | C16 | 0.922079471   | -7.643665250  | 2.377200567  |
|                       | C17 | -0.016906291  | -5.389109202  | 2.803972115  |
|                       | C18 | -1.145527710  | -5.236189912  | 3.841055485  |
|                       | C19 | 0.002876309   | -4.260902014  | 1.737962696  |
|                       | C20 | -0.151085405  | -2.875290368  | 2.370804544  |
|                       | C21 | 1.280616597   | -4.341204495  | 0.894925336  |
|                       | C22 | -3.574474038  | -5.213048282  | 4.257297588  |
|                       | C23 | -3.802290005  | -6.501837867  | 5.069028391  |
|                       | C24 | -4.829301186  | -4.777024062  | 3.465667303  |
|                       | C25 | -6.075976564  | -4.773541541  | 4.357108579  |
|                       | C26 | -4.620893300  | -3.392760004  | 2.837388403  |
|                       | C27 | -4.103742381  | -8.910750755  | 5.060351142  |
|                       | C28 | -3.151126109  | -9.166279727  | 6.210980922  |
|                       | C29 | 10.508670467  | -8.283580480  | 1.896971581  |
|                       | C30 | 10.220905320  | -6.860731579  | 2.385889276  |
|                       | C31 | 8.614138671   | -5.534908932  | 3.776444592  |
|                       | C32 | 8.885744723   | -5.638136110  | 5.290703775  |
|                       | C33 | 7.114308362   | -5.367539203  | 3.469893547  |
|                       | C34 | 6.484041049   | -4.107867521  | 4.071195226  |
|                       | C35 | 5.096636273   | -3.870453033  | 3.473225229  |
|                       | C36 | 3.248133267   | -2.541187420  | 4.507337449  |
|                       | C37 | 9.884284899   | -4.542998376  | 7.239822652  |
|                       | C38 | 9.016354598   | -3.637418110  | 8.089040380  |
|                       | C39 | -1.054429798  | -1.649707040  | -5.805662521 |
|                       | C40 | -2.437748874  | -1.243526726  | -5.275210265 |
|                       | C41 | -0.020533909  | -1.386964705  | -4.687594144 |
|                       | C42 | 1.367526132   | -2.023928461  | -4.886907004 |
|                       | C43 | 2.372234744   | -1.179971086  | -5.669786140 |
|                       | C44 | -4.076946714  | 0.580540012   | -5.265720609 |
|                       | C45 | -5.421382098  | -0.103770374  | -5.526070314 |
|                       | C46 | -4.141005887  | 2.059564961   | -5.697976596 |
|                       | C47 | -6.613331388  | -2.003430249  | -6.490340776 |
|                       | C48 | -6.869204442  | -2.900373173  | -5.270823694 |
|                       | C49 | -5.955028395  | -3.863802769  | -3.200247531 |
|                       | C50 | -5.892864781  | -3.146336033  | -1.853858229 |
|                       | C51 | -5.858274369  | -0.999051858  | -0.652124347 |
|                       | C52 | -7.246556540  | -0.824952784  | 0.004068253  |
|                       | C53 | -5.330285290  | 0.424684517   | -0.884139234 |
|                       | C54 | -3.898342563  | 0.565157311   | -1.291609674 |
|                       | C55 | -2.775433852  | -0.212893071  | -1.135549892 |
|                       | C56 | -2.138405505  | 1.700326921   | -2.068855766 |
|                       | C57 | -9.647620304  | -0.517014233  | -0.460932646 |
|                       | C58 | -10.178107719 | -1.460969453  | 0.613596736  |
|                       | C59 | -10.544817093 | -0.594066806  | -1.725291205 |
|                       | C60 | -11.830460687 | 0.175533002   | -1.665896004 |
|                       | C61 | -12.904728721 | 0.069289171   | -0.802919325 |
|                       | C62 | -13.277572088 | 1.652853198   | -2.306505889 |
|                       | C63 | 3.847790263   | 0.000805598   | 9.105150257  |
|                       | C64 | 5.327886199   | -0.337499908  | 9.125077342  |
|                       | C65 | 3.338524671   | -0.335690095  | 7.678044528  |
|                       | C66 | 1.858497573   | -0.093071895  | 7.500730733  |
|                       | C67 | 0.910158637   | -1.081851302  | 7.825849091  |
|                       | C68 | 1.383246389   | 1.130711487   | 6.997759939  |
|                       | C69 | -0.460679444  | -0.862633344  | 7.648763873  |
|                       | C70 | 0.019104637   | 1.367082399   | 6.826292738  |
|                       | C71 | -0.903769831  | 0.368804229   | 7.153003756  |
|                       | C72 | -0.856493286  | 6.406688233   | 6.415561580  |
|                       | C73 | -2.167415035  | 7.041477843   | 5.928357473  |

|       |               |              |              |
|-------|---------------|--------------|--------------|
| C74   | -0.534998421  | 5.155340644  | 5.578533351  |
| C75   | -3.204974113  | 8.942019735  | 4.764641350  |
| C76   | -3.774364927  | 8.356324519  | 3.472897414  |
| C77   | -3.429052517  | 6.779460262  | 1.604538596  |
| C78   | -4.185294761  | 5.474796041  | 1.948172857  |
| C79   | -2.220665011  | 6.563089533  | 0.672881747  |
| C80   | -2.471687608  | 5.904260687  | -0.686554362 |
| C81   | -3.194278768  | 6.747417850  | -1.754318515 |
| C82   | -5.612075767  | 7.369907729  | -1.516733495 |
| C83   | -4.453222367  | 3.544369128  | 3.423065234  |
| C84   | -5.688693906  | 3.797997974  | 4.310481038  |
| C85   | -3.550176254  | 2.530297645  | 4.140949790  |
| C86   | -6.540012678  | 5.025748404  | 6.246911766  |
| C87   | -7.835912740  | 5.817551567  | 6.083502875  |
| C88   | -9.271438120  | 7.133388547  | 4.571700268  |
| C89   | -10.571975766 | 6.406114344  | 4.167598588  |
| C90   | -8.916763382  | 8.219045207  | 3.529576769  |
| C91   | -8.549841241  | 7.605417596  | 2.181924014  |
| C92   | -11.583067610 | 4.314592712  | 3.370359376  |
| C93   | -12.613516005 | 4.049077413  | 4.464304641  |
| C94   | -11.091363303 | 2.975026225  | 2.759781824  |
| C95   | -10.209581923 | 3.183376388  | 1.550387010  |
| C96   | -10.778305783 | 3.356740486  | 0.280155326  |
| C97   | -8.812607982  | 3.253444527  | 1.667144178  |
| C98   | -9.985061061  | 3.622012451  | -0.839270423 |
| C99   | -8.002956989  | 3.535586360  | 0.563493313  |
| C100  | -8.602247958  | 3.722689984  | -0.679548466 |
| C101  | 8.238128277   | 5.715117229  | -3.687634050 |
| C102  | 6.987370806   | 5.114631757  | -4.307466213 |
| C103  | 4.582874456   | 4.610589022  | -3.948756468 |
| C104  | 3.495323236   | 5.685673525  | -4.055504835 |
| C105  | 2.083909147   | 7.227013648  | -2.766674643 |
| C106  | 2.241880670   | 8.222913484  | -1.621098478 |
| C107  | 3.095758184   | 8.772519186  | 0.584208713  |
| C108  | 3.709354966   | 10.126383026 | 0.289767350  |
| C109  | 3.526379038   | 4.371281849  | -8.477588800 |
| C110  | 2.002969827   | 4.511000536  | -8.572054478 |
| C111  | 3.882755999   | 3.087402161  | -7.693777602 |
| C112  | 5.358798679   | 2.696739117  | -7.901050295 |
| C113  | 5.772108612   | 1.616572891  | -6.924556767 |
| C114  | -0.064793973  | 5.269343431  | -7.504898584 |
| C115  | -0.445932281  | 6.650213448  | -7.005654169 |
| C116  | -0.810301857  | 4.102636387  | -6.808809856 |
| C117  | -0.189627493  | 3.700307692  | -5.493777293 |
| C118  | -0.451676504  | 4.416002331  | -4.311289304 |
| C119  | 0.736265531   | 2.643185210  | -5.443871514 |
| C120  | 0.216420966   | 4.094459266  | -3.123994414 |
| C121  | 1.407116737   | 2.324153796  | -4.256775020 |
| C122  | 1.154317620   | 3.054955552  | -3.091998255 |
| C123  | 10.857732600  | 2.045972319  | 0.433413253  |
| C124  | 11.405632390  | 1.560097458  | 1.786319196  |
| C125  | 10.076537889  | 0.943597557  | -0.298886220 |
| C126  | 9.362189255   | 1.366266711  | -1.546763981 |
| C127  | 9.917697758   | 1.850859819  | -2.714908633 |
| C128  | 7.745000468   | 1.538924852  | -3.006525664 |
| C129  | 12.643243955  | -0.104890127 | 3.060336353  |
| C130  | 13.496961845  | 0.927421820  | 3.758773629  |
| C131  | 5.271395768   | -3.940491758 | -2.536858909 |
| C132  | 5.908650182   | -3.508922419 | -1.245932480 |
| C133  | 7.015421501   | -2.395438137 | -1.446495517 |
| C134  | 8.080980461   | -2.903148599 | -2.458932887 |
| C135  | 9.293555498   | -1.964122224 | -2.557695169 |
| C136  | 10.467265631  | -2.548393740 | -3.292721949 |
| C137  | 7.729764737   | -2.245580614 | -0.066851496 |
| C138  | 3.546997797   | 2.247593930  | 1.089517648  |
| Fe139 | 5.048514022   | 2.807036898  | -0.113232062 |
| Fe140 | 1.632317183   | 2.155432180  | 0.981492246  |
| Fe141 | 3.169655714   | 2.448151577  | 3.046043666  |
| Fe142 | 3.221486033   | 4.236839655  | 1.093908446  |
| Fe143 | 1.080657477   | 4.022186412  | 2.804952556  |
| Fe144 | 4.973838317   | 1.051070037  | 1.857467463  |
| Fe145 | 3.508399567   | 0.818848945  | -0.171342521 |
| H146  | 1.003913411   | -5.988525520 | -7.468547441 |

|      |              |               |              |
|------|--------------|---------------|--------------|
| H147 | 0.696374670  | -4.452795411  | -7.930890107 |
| H148 | -3.311718767 | -5.741309157  | -8.529227787 |
| H149 | -1.165673021 | -5.114996949  | -9.263184933 |
| H150 | -0.774304668 | -6.800720804  | -8.939225889 |
| H151 | -3.883047676 | -4.882065799  | -5.898708890 |
| H152 | -3.363754529 | -8.235522460  | -7.026896822 |
| H153 | -5.001395183 | -5.756452240  | -6.976063856 |
| H154 | -3.309578114 | -10.213210971 | -5.809165449 |
| H155 | -1.290621296 | -7.995211352  | -5.393486531 |
| H156 | -4.415517399 | -9.485850839  | -4.617999705 |
| H157 | -0.925574572 | -4.828456264  | -1.323731144 |
| H158 | -1.462873050 | -6.027674729  | -3.892937123 |
| H159 | 0.688586272  | -7.880663952  | -4.168234378 |
| H160 | -5.129017963 | -6.558187086  | 0.075775012  |
| H161 | -3.736168525 | -6.844533497  | -2.440298790 |
| H162 | 0.133681417  | -9.186446452  | -3.093272656 |
| H163 | -2.241907783 | -4.397748769  | -2.449380610 |
| H164 | -2.983447450 | -9.218624563  | -1.170644126 |
| H165 | -5.414274047 | -7.797459847  | -1.175036574 |
| H166 | 1.393791615  | -5.329455315  | 0.424012794  |
| H167 | 1.266684456  | -3.582909198  | 0.095789318  |
| H168 | 2.173813594  | -4.152155619  | 1.512335806  |
| H169 | -0.861027122 | -4.432269747  | 1.076266268  |
| H170 | -2.434409052 | -11.194728026 | -0.111509462 |
| H171 | -3.768691699 | -3.375106483  | 2.142934704  |
| H172 | -3.814255200 | -7.683265330  | 3.350325695  |
| H173 | -6.294746010 | -5.767133441  | 4.775257746  |
| H174 | -0.179889449 | -2.105477466  | 1.584842294  |
| H175 | 0.696522350  | -2.633871091  | 3.027595568  |
| H176 | 3.340165135  | -0.678845049  | 9.817320304  |
| H177 | -5.520692542 | -3.089741088  | 2.282066327  |
| H178 | -6.950653617 | -4.452156245  | 3.772157784  |
| H179 | -4.442797992 | -2.640484448  | 3.622665708  |
| H180 | -5.950184989 | -4.070658209  | 5.196822337  |
| H181 | -4.988638735 | -5.509268606  | 2.653144150  |
| H182 | -3.344172868 | -4.446463536  | 5.011112108  |
| H183 | -2.583113867 | -5.448651311  | 2.364564591  |
| H184 | -1.077615024 | -2.785579115  | 2.955987487  |
| H185 | -2.595572761 | 2.448198053   | 3.599003640  |
| H186 | -4.065801979 | 1.556105772   | 4.099121198  |
| H187 | -2.946033664 | 2.161167023   | 5.965611675  |
| H188 | -2.778864817 | -0.131793257  | 7.189181187  |
| H189 | -0.328556020 | 2.311897399   | 6.409268096  |
| H190 | 2.092026821  | 1.903702066   | 6.693380020  |
| H191 | 1.244876220  | -2.046752049  | 8.217822281  |
| H192 | -0.818353453 | -6.942584074  | 1.559747916  |
| H193 | 1.544063117  | -9.057441609  | 0.911791947  |
| H194 | 0.881106531  | -9.772657695  | 2.396019826  |
| H195 | -0.685561746 | -8.769742918  | 0.084483119  |
| H196 | -3.453527753 | -10.742945649 | 1.275416250  |
| H197 | -1.180141280 | -1.650380576  | 7.888657678  |
| H198 | 0.914907448  | -5.353920910  | 3.384212587  |
| H199 | -5.139158551 | -8.962112635  | 5.434457512  |
| H200 | -3.965415741 | -9.730932366  | 4.337440603  |
| H201 | -2.146370016 | -8.693784254  | 6.107396722  |
| H202 | 10.937491802 | -4.253490069  | 7.362001786  |
| H203 | 4.370078688  | -0.758713072  | -5.796510734 |
| H204 | 6.461008698  | -5.459478043  | -2.530659316 |
| H205 | 5.491806066  | 2.304257860   | -8.919899567 |
| H206 | 6.006672084  | 3.578228920   | -7.782167738 |
| H207 | 3.245234591  | 2.252162557   | -8.020797991 |
| H208 | 0.289751654  | 7.447328561   | -7.262715503 |
| H209 | 3.841637390  | 4.224286841   | -9.522385944 |
| H210 | 0.078032465  | -0.297728948  | -4.557739763 |
| H211 | 1.272772228  | -2.987211627  | -5.417869793 |
| H212 | 1.920654790  | 5.426793370   | -6.711141306 |
| H213 | -0.376487151 | 5.267955299   | -8.568995493 |
| H214 | 4.046101467  | 5.726997899   | -6.992703712 |
| H215 | 3.941174917  | -1.862201806  | -4.487268022 |
| H216 | 3.664037813  | 3.251389754   | -6.627305585 |
| H217 | 5.159078087  | 5.582337090   | -8.197828586 |
| H218 | -0.956839127 | -1.470471299  | -7.863577122 |
| H219 | -0.445404589 | -1.786405621  | -3.755463564 |

|      |               |              |              |
|------|---------------|--------------|--------------|
| H220 | 6.557081454   | 3.021655766  | -5.785611029 |
| H221 | 1.795642873   | -2.266875592 | -3.903799985 |
| H222 | -5.239416371  | -1.529100417 | 0.084676197  |
| H223 | -2.643352527  | -1.202510087 | -0.710098966 |
| H224 | -6.925711426  | -4.378473362 | -3.248234465 |
| H225 | -4.932215895  | -2.584363296 | -4.566512272 |
| H226 | -8.134109527  | -1.221549679 | -1.800615716 |
| H227 | -13.095085934 | -0.562958107 | 0.056275215  |
| H228 | -9.866736937  | -2.525891494 | 0.471826323  |
| H229 | -10.719877189 | -1.655527264 | -1.972939465 |
| H230 | -9.640694834  | 0.505854759  | -0.054942732 |
| H231 | -13.796083644 | 2.448217328  | -2.834023232 |
| H232 | -5.481142066  | 0.973841558  | 0.060239192  |
| H233 | -5.965921250  | 0.922917950  | -1.635029402 |
| H234 | -14.715893520 | 1.206192555  | -0.804109789 |
| H235 | -9.965822900  | -0.169093353 | -2.560125126 |
| H236 | -5.873227822  | -1.305448473 | -2.784379628 |
| H237 | -5.177594956  | -4.641315217 | -3.202150036 |
| H238 | -7.514592844  | -1.394007630 | -6.637464615 |
| H239 | -1.510384627  | 2.488656887  | -2.473208930 |
| H240 | -6.493060300  | -2.645464479 | -7.373003163 |
| H241 | 3.800751875   | 1.591395947  | 10.398503036 |
| H242 | 2.709378134   | 1.698647965  | 9.185618996  |
| H243 | -2.811170301  | 4.961169943  | 3.410474036  |
| H244 | -4.832987509  | 3.066377445  | 2.508893154  |
| H245 | -4.774890844  | 5.429362012  | 5.154936998  |
| H246 | -4.096897904  | 2.561093727  | -2.089236553 |
| H247 | -5.267541465  | 3.565018964  | -3.493597962 |
| H248 | -6.190844596  | 3.681303372  | -2.203799643 |
| H249 | -3.208605710  | 2.561643778  | -5.405091852 |
| H250 | -4.247429523  | 2.125726785  | -6.793354405 |
| H251 | -8.090745079  | 8.825090374  | 3.929570692  |
| H252 | -9.796098807  | 8.860112841  | 3.392191498  |
| H253 | -6.481115155  | 7.789977552  | 2.545965605  |
| H254 | -6.946566823  | 6.820751330  | 1.178174109  |
| H255 | -6.122910125  | 9.303938612  | -1.084485013 |
| H256 | -2.792242189  | 6.514497277  | -2.752103301 |
| H257 | -10.443673557 | 3.741934857  | -1.824782556 |
| H258 | -8.327341218  | 3.083926497  | 2.631055274  |
| H259 | -7.112975998  | 5.946519574  | -1.499249797 |
| H260 | -1.475213606  | 5.950309644  | 1.201808978  |
| H261 | -2.097258119  | 7.183221049  | 3.221514308  |
| H262 | -2.993034917  | 4.943626811  | -0.562134434 |
| H263 | -4.574809084  | -1.403314278 | -6.841148446 |
| H264 | -2.932599270  | 9.988355891  | 4.574671601  |
| H265 | -2.297800492  | 0.301125432  | -6.539065411 |
| H266 | -1.756516961  | 7.550288058  | 0.513128432  |
| H267 | -6.923562783  | 3.639147377  | 0.682829811  |
| H268 | -5.958823436  | 2.075781710  | -4.975898844 |
| H269 | -4.024389766  | 8.936603641  | 5.494850502  |
| H270 | -4.506840810  | 9.098636679  | -1.647537047 |
| H271 | -7.647864945  | 7.596716181  | -1.407300834 |
| H272 | 0.267944980   | -0.679397018 | -7.049139991 |
| H273 | -1.109880121  | -2.743977741 | -5.958677218 |
| H274 | -11.861288991 | 3.283976964  | 0.154456897  |
| H275 | -3.984478779  | 0.551220899  | -4.168042460 |
| H276 | -4.175564429  | 7.417828831  | 1.112170030  |
| H277 | -2.996874358  | 7.814326159  | -1.589735186 |
| H278 | -1.478220142  | 5.661419785  | -1.087831939 |
| H279 | -4.918435753  | 5.538362776  | -2.061921619 |
| H280 | -6.828255626  | 4.016874108  | 6.579462401  |
| H281 | -7.435500453  | 6.125837494  | 4.095433142  |
| H282 | -9.509255769  | 7.631984124  | 5.521498994  |
| H283 | -5.980092096  | 5.502242894  | 7.063094989  |
| H284 | -9.544253376  | 4.650418054  | 3.966403385  |
| H285 | 7.959986945   | 6.544560239  | -3.021075670 |
| H286 | 8.663628950   | 4.919179399  | -3.042959624 |
| H287 | 10.166565234  | 2.864986521  | 0.679354882  |
| H288 | 10.068826758  | 6.361690808  | -4.310585258 |
| H289 | 9.273823460   | 5.451100687  | -5.416569344 |
| H290 | 0.434947450   | 4.766370419  | 5.913676056  |
| H291 | -1.776435329  | 5.467016036  | 7.975303069  |
| H292 | -1.125033182  | 8.643492639  | 5.171158196  |

|      |               |               |              |
|------|---------------|---------------|--------------|
| H293 | -1.317507149  | 4.405221549   | 5.758858559  |
| H294 | -1.044660249  | 6.863506674   | 8.410026825  |
| H295 | 3.727705808   | 8.282700133   | 1.342527692  |
| H296 | -0.034939146  | 7.131358440   | 6.298030146  |
| H297 | 6.578947876   | -6.265983662  | 3.821801650  |
| H298 | 9.168979902   | -4.689518817  | 3.351952927  |
| H299 | 3.546276719   | 7.007836473   | -0.525349178 |
| H300 | 1.886547281   | -1.189383232  | 5.191103989  |
| H301 | 2.096951595   | 7.795456376   | -3.705257236 |
| H302 | 2.139056946   | 1.513781475   | -4.242133904 |
| H303 | 1.068176631   | 6.805733304   | -2.668037060 |
| H304 | 4.426677195   | -4.716363799  | 3.675316099  |
| H305 | 3.418769799   | 5.685558356   | -2.017624433 |
| H306 | 5.174419773   | -3.787527512  | 2.376971416  |
| H307 | 7.020093342   | -5.335384553  | 2.371550599  |
| H308 | 7.108159455   | -3.226856968  | 3.857460970  |
| H309 | 6.405397571   | -4.194734937  | 5.167042756  |
| H310 | -0.803468941  | 3.245549049   | -7.497639734 |
| H311 | 8.656038621   | -7.646281416  | 3.346246086  |
| H312 | 10.287780634  | -8.280757982  | 0.817501758  |
| H313 | 1.682007955   | 2.827884458   | -2.163377380 |
| H314 | 10.182383248  | -9.691997732  | 3.365825545  |
| H315 | 9.513815509   | -10.085445459 | 1.919661169  |
| H316 | 4.855727724   | -1.758050111  | 3.597172025  |
| H317 | 0.031050930   | 4.652240090   | -2.203587494 |
| H318 | 0.943476295   | 2.060599675   | -6.344200205 |
| H319 | 12.264436937  | -2.712647326  | 0.541799139  |
| H320 | 10.777420994  | 0.131279737   | -0.562697608 |
| H321 | 9.946084884   | -3.086997781  | 1.224672883  |
| H322 | 12.600089161  | -2.442231714  | -0.937032382 |
| H323 | 4.380613993   | 10.153675587  | -0.601757294 |
| H324 | 7.767350747   | -1.025345568  | 2.291877051  |
| H325 | 6.358310185   | -4.363248940  | -0.718618965 |
| H326 | 5.932038935   | 5.512801500   | -2.592803638 |
| H327 | 8.422647785   | -3.895874679  | -2.128179771 |
| H328 | 8.955224864   | 2.250451392   | -4.587410743 |
| H329 | 6.779703337   | 1.501875634   | -3.497383924 |
| H330 | 11.597125747  | -8.433775895  | 1.992861068  |
| H331 | 3.131727603   | -0.517897513  | 4.176621544  |
| H332 | 9.336427482   | -1.738886970  | 4.008395048  |
| H333 | 7.353837957   | -0.134920801  | 3.496914216  |
| H334 | 9.742806768   | -3.741378656  | 5.243729525  |
| H335 | 3.172200121   | -4.437577525  | 5.308804625  |
| H336 | 10.978964500  | -3.310153183  | -4.946127648 |
| H337 | 8.988775504   | -1.036655998  | -3.064828082 |
| H338 | 9.657732906   | -1.694813584  | -1.560695808 |
| H339 | 7.613181477   | -3.011316957  | -3.449096346 |
| H340 | 4.298224760   | 3.836472403   | -3.217404625 |
| H341 | -1.164934907  | 5.243637347   | -4.332502700 |
| H342 | -1.855526882  | 4.423128106   | -6.675352212 |
| H343 | 5.135481876   | -3.054217335  | -0.610867828 |
| H344 | 10.467411685  | -2.566513466  | 3.342768037  |
| H345 | 10.892044993  | -4.173273167  | 1.823080835  |
| H346 | 1.706138437   | -3.538191168  | 5.433697981  |
| H347 | 10.938115075  | 2.116936029   | -2.961229894 |
| H348 | 9.340510275   | 0.506856128   | 0.387340414  |
| H349 | 4.700642959   | 4.149282988   | -4.932104938 |
| H350 | 2.098300070   | 8.920304220   | 1.026135418  |
| H351 | 3.574772610   | -1.393905546  | 7.489139497  |
| H352 | 3.900325973   | 0.270227963   | 6.949207568  |
| H353 | 12.372845601  | 3.387989428   | 0.086168338  |
| H354 | 12.665107065  | 1.910628669   | -0.552069305 |
| H355 | 13.290857996  | -0.965239783  | 2.830963523  |
| H356 | 12.181225756  | -0.211844724  | 0.982390074  |
| H357 | 13.969514313  | 1.685521214   | 3.091114877  |
| H358 | 11.853842077  | -0.457953680  | 3.743847784  |
| H359 | 5.989859055   | 0.489791742   | 8.769913464  |
| H360 | -12.238806677 | 4.167343268   | 5.509034375  |
| H361 | 9.765929019   | -5.563533232  | 7.636706137  |
| H362 | 8.001331131   | -3.425014006  | 7.674015184  |
| H363 | -12.091808003 | 4.899136524   | 2.586093569  |
| H364 | -10.559768764 | 2.398432492   | 3.533686288  |
| H365 | -11.986869563 | 2.398525979   | 2.486234315  |



|       |               |               |              |
|-------|---------------|---------------|--------------|
| H366  | -8.322831287  | 4.084068077   | -2.577187460 |
| H367  | 1.064271380   | -0.652814899  | 0.399565984  |
| H368  | -0.694869978  | 0.296388988   | -1.477307623 |
| Mo369 | 6.128941982   | 0.329545468   | -0.462234275 |
| N370  | 0.638535059   | -5.425574683  | -8.241279360 |
| N371  | -3.009047508  | -5.851806416  | -7.564191550 |
| N372  | -3.595565697  | -8.165580982  | -6.038367210 |
| N373  | -1.253172176  | -8.535744057  | -4.530735546 |
| N374  | -1.274426810  | -6.181571626  | -2.901557546 |
| N375  | -3.669360146  | -6.699337282  | -1.430394584 |
| N376  | -3.174671428  | -9.250735607  | -0.165280575 |
| N377  | -0.549075732  | -9.196667761  | 1.005352805  |
| N378  | -0.053350520  | -6.715005889  | 2.192937321  |
| N379  | -2.419567288  | -5.333270906  | 3.367134713  |
| N380  | -3.818651316  | -7.666141092  | 4.371985731  |
| N381  | 9.689499932   | -9.307390255  | 2.557046699  |
| N382  | 9.109905772   | -6.749275830  | 3.137886530  |
| N383  | 4.467595939   | -2.636481285  | 3.957981923  |
| N384  | 2.630142072   | -3.629741592  | 5.020029663  |
| N385  | 2.603908420   | -1.363435463  | 4.488572812  |
| N386  | 9.505919821   | -4.564115562  | 5.839761085  |
| N387  | -0.742861981  | -0.910756594  | -7.035307026 |
| N388  | 3.659038875   | -1.295006742  | -5.289407787 |
| N389  | -2.932155878  | -0.103819166  | -5.831269663 |
| N390  | -5.443912038  | -1.148198554  | -6.376211983 |
| N391  | -5.842596671  | -3.022194543  | -4.378335329 |
| N392  | -5.881914705  | -1.777393371  | -1.881945195 |
| N393  | -3.466306159  | 1.745195656   | -1.884177547 |
| N394  | -1.708519493  | 0.513216352   | -1.629143875 |
| N395  | -8.299703049  | -0.915814098  | -0.845454570 |
| N396  | -12.077224953 | 1.168383173   | -2.600784993 |
| N397  | -13.809686976 | 1.018876786   | -1.224090159 |
| N398  | 3.672868426   | 1.425295234   | 9.397312129  |
| N399  | -0.926410409  | 6.023421189   | 7.835291065  |
| N400  | -2.053170908  | 8.251335259   | 5.309727252  |
| N401  | -2.983282034  | 7.496272675   | 2.796281486  |
| N402  | -4.642274993  | 6.506116756   | -1.817584715 |
| N403  | -5.352078408  | 8.673311079   | -1.281768751 |
| N404  | -6.879881264  | 6.933385480   | -1.374563127 |
| N405  | -3.754486053  | 4.766392265   | 3.027294900  |
| N406  | -5.660988552  | 4.917467035   | 5.090111553  |
| N407  | -8.139053836  | 6.250591720   | 4.825188263  |
| N408  | -7.228340374  | 7.314927611   | 2.024490884  |
| N409  | -10.459994917 | 5.085624063   | 3.882107929  |
| N410  | 9.149435930   | 6.198057689   | -4.727380926 |
| N411  | 5.866602727   | 5.185238323   | -3.561827777 |
| N412  | 3.071893289   | 6.168166562   | -2.867647148 |
| N413  | 3.050653783   | 7.907110579   | -0.581174564 |
| N414  | 4.154733339   | 5.613771303   | -8.008682228 |
| N415  | 1.380757769   | 5.133409009   | -7.530961075 |
| N416  | 11.929402465  | 2.610263992   | -0.411123021 |
| N417  | 7.994127117   | 1.185311125   | -1.749887448 |
| N418  | 8.883155291   | 1.950127449   | -3.619563707 |
| N419  | 12.102103584  | 0.388817426   | 1.803426551  |
| N420  | -2.589941117  | 2.643995359   | 0.977845799  |
| N421  | -1.783242110  | 1.877697220   | 1.092479602  |
| O422  | -1.253714888  | -5.841584062  | -6.111868762 |
| O423  | -4.295558969  | -6.810516025  | -4.343426696 |
| O424  | -2.449273966  | -9.795133665  | -3.044571981 |
| O425  | -0.222931755  | -7.433428172  | -1.320459863 |
| O426  | -2.710737773  | -5.565551114  | 0.292248242  |
| O427  | -4.405401089  | -8.444319971  | 1.580840768  |
| O428  | -1.244613737  | -10.819289196 | 2.475926060  |
| O429  | 1.936300113   | -7.462945268  | 3.066973766  |
| O430  | -0.888731237  | -5.033577547  | 5.038196499  |
| O431  | -3.966325746  | -6.478033521  | 6.300262033  |
| O432  | -3.425499617  | -9.889266713  | 7.157182332  |
| O433  | 10.982058547  | -5.927020657  | 2.051501048  |
| O434  | 8.557127976   | -6.657822526  | 5.921836311  |
| O435  | 9.376304135   | -3.173589773  | 9.158944433  |
| O436  | -3.049138098  | -1.897883677  | -4.406533741 |
| O437  | 2.026073738   | -0.441285969  | -6.619332025 |
| O438  | -6.436892691  | 0.301730131   | -4.916900514 |

|      |               |              |              |
|------|---------------|--------------|--------------|
| O439 | -5.228868436  | 2.741576232  | -5.053913252 |
| O440 | -7.959275029  | -3.470854881 | -5.153975437 |
| O441 | -5.882160465  | -3.792570082 | -0.802969240 |
| O442 | -7.353606190  | -0.516454384 | 1.194677350  |
| O443 | -10.910228370 | -1.123859994 | 1.526998982  |
| O444 | 5.782916446   | -1.418668977 | 9.468304739  |
| O445 | -2.241234821  | 0.646076741  | 6.951992347  |
| O446 | -3.269566099  | 6.487968442  | 6.095518792  |
| O447 | -4.912388547  | 8.706388641  | 3.097984734  |
| O448 | -5.161921273  | 5.135815974  | 1.256178722  |
| O449 | -6.625384253  | 2.985894406  | 4.323585238  |
| O450 | -3.330316008  | 2.931061727  | 5.496243066  |
| O451 | -8.562131880  | 6.017566798  | 7.065749607  |
| O452 | -11.647181458 | 7.019692140  | 4.115764912  |
| O453 | -9.410086637  | 7.300252412  | 1.341237221  |
| O454 | -13.761432686 | 3.710982692  | 4.225506649  |
| O455 | -7.770956004  | 4.048539202  | -1.771204788 |
| O456 | 7.036798413   | 4.571703552  | -5.439942492 |
| O457 | 3.063991912   | 6.078055866  | -5.161326950 |
| O458 | 1.587431953   | 9.279883402  | -1.648044247 |
| O459 | 3.528067948   | 11.114312655 | 0.983733119  |
| O460 | 1.372161806   | 4.051877897  | -9.538548792 |
| O461 | 5.517442249   | 0.426240415  | -7.085986527 |
| O462 | 6.414522862   | 2.023299511  | -5.811864886 |
| O463 | -1.480743540  | 6.915095453  | -6.410909214 |
| O464 | 11.292237991  | 2.244770689  | 2.819881564  |
| O465 | 13.727723144  | 0.902162712  | 4.959590290  |
| O466 | 4.377605350   | -3.349963968 | -3.126298220 |
| O467 | 5.764453919   | -5.088401149 | -3.106139089 |
| O468 | 11.606609077  | -2.663101201 | -2.847011176 |
| O469 | 10.154216902  | -2.951910638 | -4.553716307 |
| O470 | 7.612509072   | -1.084622669 | 0.486367669  |
| O471 | 8.393990657   | -3.199760607 | 0.402993496  |
| O472 | 6.440549189   | -1.209048853 | -1.856826150 |
| O473 | 10.130917458  | -2.285676030 | 4.234286069  |
| O474 | 7.799546454   | -0.976986237 | 3.282875246  |
| O475 | -5.264129594  | 3.799761508  | -2.526739991 |
| O476 | 12.992914663  | -2.381621751 | -0.042479571 |
| O477 | 10.830817840  | -3.192923123 | 1.671620492  |
| S478 | -0.476475715  | 5.478167122  | 3.756815849  |
| S479 | 1.005749818   | 4.256001052  | 0.487297478  |
| S480 | 4.625750978   | 1.526993113  | -1.917680284 |
| S481 | 0.988412266   | 1.807668082  | 3.141812794  |
| S482 | 1.333921381   | 0.379561940  | -0.458062999 |
| S483 | 4.840226665   | 5.037590126  | -0.264605255 |
| S484 | 4.483804292   | -0.876402383 | 0.832378423  |
| S485 | 3.224150954   | 4.647032638  | 3.364665375  |
| S486 | 6.816333049   | 2.036047005  | 1.062328371  |
| S487 | 4.652059443   | 1.108875814  | 4.034593358  |

### Structure C 47(3/2)

|            |              |                        |                                        |
|------------|--------------|------------------------|----------------------------------------|
| C 47(3/2)  |              | bm22b6x2n2x47dtg.car_3 |                                        |
| associated |              | C1                     | -1.616251807 -8.942474568 -2.742886291 |
| Fe( 139)   | 0.534 2.273  | C2                     | -0.657757345 -9.608548018 -3.733217689 |
| Fe( 140)   | 0.426 -1.176 | C3                     | -3.955988808 -8.468153105 -2.172348783 |
| Fe( 141)   | 0.575 2.830  | C4                     | -3.968887973 -8.882792083 -0.702110097 |
| Fe( 142)   | 0.551 -2.629 | C5                     | -3.502235693 -10.617494142 0.956357426 |
| Fe( 143)   | 0.554 2.850  | C6                     | -2.385479197 -9.947812987 1.763346422  |
| Fe( 144)   | 0.510 -2.292 | C7                     | -0.206799092 -8.834248914 1.698309164  |
| Fe( 145)   | 0.334 0.942  | C8                     | -0.597747249 -7.391889429 2.031509574  |
|            |              | C9                     | -1.799737081 -5.383206555 1.348358863  |
|            |              | C10                    | -2.827485781 -5.328442036 2.489495724  |
|            |              | C11                    | -4.737417247 -6.351636162 3.584280554  |
|            |              | C12                    | -4.181192235 -6.687866334 4.974103935  |
|            |              | C13                    | -2.823215712 -8.225695273 6.310418315  |
|            |              | C14                    | -1.591245023 -7.535323103 6.912083429  |
|            |              | C15                    | 0.590291549 -6.487077357 6.462894603   |
|            |              | C16                    | 0.776674538 -4.973225339 6.321388360   |
|            |              | C17                    | -0.157796620 -2.872952007 5.388781276  |
|            |              | C18                    | -1.304083974 -2.161240717 6.129294580  |
|            |              | C19                    | -0.105613908 -2.543798398 3.873874706  |
|            |              | C20                    | -0.266674370 -1.043057275 3.610084116  |

|     |               |              |              |
|-----|---------------|--------------|--------------|
| C21 | 1.189379316   | -3.080832748 | 3.252257593  |
| C22 | -3.739180100  | -1.904393735 | 6.404578335  |
| C23 | -4.003955890  | -2.507522268 | 7.796305467  |
| C24 | -4.973264156  | -1.971432543 | 5.473829646  |
| C25 | -6.229460538  | -1.451549646 | 6.181685493  |
| C26 | -4.718288919  | -1.180747368 | 4.183483402  |
| C27 | -4.355937569  | -4.489043890 | 9.147832023  |
| C28 | -3.410169404  | -4.060557182 | 10.250246026 |
| C29 | 10.355774802  | -5.734202475 | 6.465770250  |
| C30 | 10.062690812  | -4.287101237 | 6.062133244  |
| C31 | 8.452840994   | -2.413016899 | 6.442797015  |
| C32 | 8.701110585   | -1.637851209 | 7.752209923  |
| C33 | 6.961123681   | -2.445220733 | 6.066276142  |
| C34 | 6.343596341   | -1.063605952 | 5.824483364  |
| C35 | 4.953179305   | -1.205231434 | 5.202807785  |
| C36 | 3.112608145   | 0.493316391  | 5.219917768  |
| C37 | 9.664738176   | 0.379288576  | 8.748883935  |
| C38 | 8.797855172   | 1.614396555  | 8.890657564  |
| C39 | -0.986125045  | -4.670003535 | -3.879466956 |
| C40 | -2.369528428  | -4.025369108 | -3.704055952 |
| C41 | 0.025063483   | -3.820707310 | -3.074094023 |
| C42 | 1.410929506   | -4.459151998 | -2.847055485 |
| C43 | 2.443240950   | -4.178857951 | -3.937835834 |
| C44 | -3.973013710  | -2.501296844 | -4.760515915 |
| C45 | -5.320160997  | -3.210135621 | -4.610682506 |
| C46 | -4.015919344  | -1.532084375 | -5.961465388 |
| C47 | -6.518696196  | -5.321952218 | -4.373314565 |
| C48 | -6.800029086  | -5.399826495 | -2.864686840 |
| C49 | -5.950522630  | -4.993870878 | -0.591048150 |
| C50 | -5.916646502  | -3.639209977 | 0.112284253  |
| C51 | -5.912235412  | -1.186369430 | -0.104618228 |
| C52 | -7.320175325  | -0.693030197 | 0.307501309  |
| C53 | -5.374838503  | -0.135290154 | -1.087148410 |
| C54 | -3.926185023  | -0.225125485 | -1.442315902 |
| C55 | -2.831493437  | -0.787177286 | -0.833540172 |
| C56 | -2.113083425  | 0.280808598  | -2.643554159 |
| C57 | -9.705332567  | -0.717240434 | -0.315557332 |
| C58 | -10.270463608 | -0.899604828 | 1.088080849  |
| C59 | -10.569324185 | -1.497251579 | -1.341287116 |
| C60 | -11.842091213 | -0.827395208 | -1.763502688 |
| C61 | -12.942040298 | -0.446034325 | -1.019355140 |
| C62 | -13.250089161 | 0.041903903  | -3.158970301 |
| C63 | 3.651405330   | 5.155323805  | 7.601827605  |
| C64 | 5.126505791   | 4.901682635  | 7.855424867  |
| C65 | 3.172596524   | 4.066552225  | 6.606554817  |
| C66 | 1.701344152   | 4.170208198  | 6.279144932  |
| C67 | 0.728382026   | 3.548118457  | 7.083785352  |
| C68 | 1.261019863   | 4.889909322  | 5.153770711  |
| C69 | -0.634487652  | 3.630314810  | 6.775562419  |
| C70 | -0.094503130  | 4.988749039  | 4.838388734  |
| C71 | -1.041704552  | 4.357084838  | 5.650749929  |
| C72 | -0.917439647  | 8.956879129  | 1.676529462  |
| C73 | -2.199845898  | 9.181241417  | 0.865459445  |
| C74 | -0.551645322  | 7.465829411  | 1.682066189  |
| C75 | -3.178791659  | 10.074860343 | -1.201350467 |
| C76 | -3.733535468  | 8.853255601  | -1.935917898 |
| C77 | -3.364027475  | 6.507482597  | -2.602571161 |
| C78 | -4.147183540  | 5.610882464  | -1.618521868 |
| C79 | -2.140312055  | 5.797337345  | -3.215449905 |
| C80 | -2.385963905  | 4.480818656  | -3.961614604 |
| C81 | -3.084580419  | 4.573417873  | -5.332243609 |
| C82 | -5.496406058  | 5.209650867  | -5.567682617 |
| C83 | -4.462608192  | 4.808196805  | 0.669332236  |
| C84 | -5.699213451  | 5.524556272  | 1.255299075  |
| C85 | -3.581751406  | 4.339802571  | 1.834152610  |
| C86 | -6.577337435  | 7.635836288  | 2.128285880  |
| C87 | -7.872588081  | 8.186385500  | 1.532193557  |
| C88 | -9.277564636  | 8.441582939  | -0.478254214 |
| C89 | -10.595425651 | 7.635556251  | -0.440940548 |
| C90 | -8.886205018  | 8.769175338  | -1.940027146 |
| C91 | -8.506075243  | 7.508001568  | -2.707394806 |
| C92 | -11.655611952 | 5.472584402  | 0.075336022  |
| C93 | -12.702603039 | 5.863846991  | 1.113347242  |

|       |               |               |              |
|-------|---------------|---------------|--------------|
| C94   | -11.164059680 | 4.021203484   | 0.339462384  |
| C95   | -10.248825988 | 3.511352395   | -0.750287436 |
| C96   | -10.784801077 | 2.935912150   | -1.912570880 |
| C97   | -8.853612339  | 3.640559226   | -0.660336052 |
| C98   | -9.965439856  | 2.520208546   | -2.964148493 |
| C99   | -8.017058907  | 3.254507321   | -1.712683393 |
| C100  | -8.586265791  | 2.705377330   | -2.858627711 |
| C101  | 8.355534705   | 2.618460237   | -6.035490305 |
| C102  | 7.114284332   | 1.774386406   | -6.278418852 |
| C103  | 4.694012401   | 1.552940252   | -5.775736308 |
| C104  | 3.620665451   | 2.381402257   | -6.487550199 |
| C105  | 2.211744587   | 4.381771526   | -6.327252476 |
| C106  | 2.339642531   | 5.849680318   | -5.926689855 |
| C107  | 3.150091576   | 7.559360465   | -4.405761655 |
| C108  | 3.851180930   | 8.501593605   | -5.363017166 |
| C109  | 3.732228716   | -1.203063005  | -9.364047561 |
| C110  | 2.211065518   | -1.151495966  | -9.555695172 |
| C111  | 4.056169232   | -1.823441315  | -7.984070616 |
| C112  | 5.532401611   | -2.255829085  | -7.903296644 |
| C113  | 5.907773786   | -2.587347574  | -6.475782220 |
| C114  | 0.130532739   | 0.088028864   | -9.176155672 |
| C115  | -0.226376312  | 1.513329323   | -9.556747220 |
| C116  | -0.643564863  | -0.464724079  | -7.951771071 |
| C117  | -0.054299946  | -0.046862585  | -6.625692532 |
| C118  | -0.333778953  | 1.208393432   | -6.054863917 |
| C119  | 0.858807098   | -0.891769798  | -5.968315658 |
| C120  | 0.304355962   | 1.610385766   | -4.874396619 |
| C121  | 1.498076674   | -0.487373299  | -4.790792702 |
| C122  | 1.232496008   | 0.771848772   | -4.243354140 |
| C123  | 10.878007890  | 1.960409069   | -0.564787533 |
| C124  | 11.377577473  | 2.333506212   | 0.839982103  |
| C125  | 10.121527898  | 0.621623456   | -0.566558110 |
| C126  | 9.448943554   | 0.258305887   | -1.852866666 |
| C127  | 10.044693324  | 0.011495574   | -3.074524661 |
| C128  | 7.878583258   | -0.431342049  | -3.204891879 |
| C129  | 12.513021337  | 1.691763120   | 2.889537392  |
| C130  | 13.398707811  | 2.918322294   | 2.883504532  |
| C131  | 5.324785335   | -4.713621803  | 0.257359084  |
| C132  | 5.940040453   | -3.618008103  | 1.079785523  |
| C133  | 7.069046291   | -2.815237687  | 0.316620757  |
| C134  | 8.158361948   | -3.804981746  | -0.185600527 |
| C135  | 9.373537885   | -3.080610294  | -0.787398214 |
| C136  | 10.556574522  | -3.969926621  | -1.043391555 |
| C137  | 7.742049024   | -1.900410916  | 1.386281024  |
| C138  | 3.485236337   | 2.469078112   | -0.281406149 |
| Fe139 | 5.021228901   | 2.204860492   | -1.513742284 |
| Fe140 | 1.238005518   | 2.479675371   | -0.383351824 |
| Fe141 | 3.252233030   | 3.782825505   | 1.180792684  |
| Fe142 | 3.390158106   | 4.131356054   | -1.372121668 |
| Fe143 | 1.283955408   | 5.152341725   | -0.119577246 |
| Fe144 | 4.868382916   | 1.857434881   | 1.014601857  |
| Fe145 | 3.525295410   | 0.300193083   | -0.616474781 |
| H146  | 1.059004453   | -9.146230404  | -2.735803950 |
| H147  | 0.758997321   | -8.161827855  | -4.004346622 |
| H148  | -3.227792359  | -9.580258381  | -3.850037615 |
| H149  | -1.058162366  | -9.502607511  | -4.752973635 |
| H150  | -0.675179565  | -10.689656008 | -3.508343684 |
| H151  | -3.805484906  | -7.378057569  | -2.182166429 |
| H152  | -3.331019509  | -10.770759521 | -1.183939006 |
| H153  | -4.941583483  | -8.685189811  | -2.606103839 |
| H154  | -3.325467253  | -11.701491445 | 0.945372655  |
| H155  | -1.302912408  | -9.619332223  | 0.050023530  |
| H156  | -4.443769892  | -10.428452641 | 1.487998459  |
| H157  | -0.975480556  | -4.717042128  | 1.632944566  |
| H158  | -1.465673513  | -7.155290607  | 0.172138573  |
| H159  | 0.660587210   | -8.830166864  | 1.024202112  |
| H160  | -5.223274852  | -5.369654861  | 3.653233805  |
| H161  | -3.772861044  | -7.030081835  | 1.785269896  |
| H162  | 0.089396797   | -9.311944542  | 2.640238845  |
| H163  | -2.254912636  | -4.996284435  | 0.425217898  |
| H164  | -3.081091858  | -8.254188722  | 4.189413030  |
| H165  | -5.498245212  | -7.099158337  | 3.320227672  |
| H166  | 1.293771307   | -4.162845432  | 3.418067494  |

|      |               |              |               |
|------|---------------|--------------|---------------|
| H167 | 1.200863242   | -2.896920233 | 2.166565041   |
| H168 | 2.070843678   | -2.580382262 | 3.682449402   |
| H169 | -0.957606570  | -3.061197406 | 3.404617900   |
| H170 | -2.573584011  | -9.289307131 | 6.179410256   |
| H171 | -3.853745527  | -1.563260960 | 3.623722815   |
| H172 | -4.027232563  | -4.454829237 | 7.045320142   |
| H173 | -6.487012646  | -2.046742509 | 7.069471377   |
| H174 | -0.309503047  | -0.862695007 | 2.525653182   |
| H175 | 0.583517723   | -0.466327603 | 4.001837291   |
| H176 | 3.117663578   | 5.001198446  | 8.559497661   |
| H177 | -5.595355475  | -1.244323422 | 3.522854609   |
| H178 | -7.085687028  | -1.486103330 | 5.492382961   |
| H179 | -4.541367526  | -0.117820517 | 4.415655509   |
| H180 | -6.091666534  | -0.405669750 | 6.500058966   |
| H181 | -5.139590015  | -3.031502228 | 5.208028556   |
| H182 | -3.497922308  | -0.849604948 | 6.600793872   |
| H183 | -2.717558222  | -3.173494576 | 5.002123178   |
| H184 | -1.189471636  | -0.633597315 | 4.048952271   |
| H185 | -2.658490708  | 3.892691786  | 1.427524997   |
| H186 | -4.147269212  | 3.558270577  | 2.369729602   |
| H187 | -2.949842211  | 5.074791051  | 3.537205509   |
| H188 | -2.924504055  | 3.960584013  | 5.903529094   |
| H189 | -0.419365733  | 5.528598596  | 3.948936409   |
| H190 | 1.994146938   | 5.351370264  | 4.488814371   |
| H191 | 1.038369785   | 2.976373721  | 7.962561690   |
| H192 | -0.951596905  | -4.860535071 | 5.236642353   |
| H193 | 1.406608407   | -6.965184056 | 5.899907210   |
| H194 | 0.723633327   | -6.730687838 | 7.525351115   |
| H195 | -0.799875983  | -7.201987754 | 5.022167408   |
| H196 | -3.621171457  | -8.144703901 | 7.060356603   |
| H197 | -1.375139545  | 3.124623032  | 7.402152782   |
| H198 | 0.762634974   | -2.511784805 | 5.866049804   |
| H199 | -5.390689288  | -4.293391245 | 9.472612439   |
| H200 | -4.245537773  | -5.576838539 | 9.022859535   |
| H201 | -2.403277670  | -3.724702825 | 9.908129540   |
| H202 | 10.723045969  | 0.680050789  | 8.722394339   |
| H203 | 4.444044254   | -3.856116181 | -4.223113036  |
| H204 | 6.515622822   | -5.945861203 | 1.139854531   |
| H205 | 5.683222951   | -3.153579260 | -8.520540516  |
| H206 | 6.183977712   | -1.456994469 | -8.287938640  |
| H207 | 3.414785479   | -2.699116296 | -7.800271424  |
| H208 | 0.529797101   | 2.008802530  | -10.209448530 |
| H209 | 4.068789808   | -1.914031141 | -10.134942367 |
| H210 | 0.139525115   | -2.843563207 | -3.573075550  |
| H211 | 1.318302768   | -5.557041320 | -2.767093883  |
| H212 | 2.106752250   | 0.673093112  | -8.575866360  |
| H213 | -0.168049910  | -0.520381291 | -10.052386321 |
| H214 | 4.230395496   | 0.761843529  | -8.902632724  |
| H215 | 3.969249130   | -4.036972385 | -2.532710288  |
| H216 | 3.821904891   | -1.089007074 | -7.197297865  |
| H217 | 5.372970125   | -0.040604807 | -9.773162103  |
| H218 | -0.841886679  | -5.687236720 | -5.670300556  |
| H219 | -0.425522608  | -3.633425553 | -2.087550450  |
| H220 | 6.697565693   | -0.786450552 | -6.326223122  |
| H221 | 1.810220133   | -4.120164622 | -1.880067778  |
| H222 | 3.330404619   | -1.154453674 | -1.015168404  |
| H223 | -5.316496905  | -1.204101450 | 0.818594801   |
| H224 | -2.737000382  | -1.369534307 | 0.074217716   |
| H225 | -6.923947400  | -5.449084453 | -0.361700832  |
| H226 | -4.888496707  | -4.700219937 | -2.415989757  |
| H227 | -8.154002164  | -2.029612227 | -1.002346616  |
| H228 | -13.165636568 | -0.495580366 | 0.040800402   |
| H229 | -9.943835972  | -1.846562932 | 1.583863646   |
| H230 | -10.757486519 | -2.510335295 | -0.946177257  |
| H231 | -9.698753808  | 0.356790287  | -0.558037181  |
| H232 | -13.745639498 | 0.404696717  | -4.056558366  |
| H233 | -5.556051232  | 0.850519116  | -0.628517820  |
| H234 | -5.978262378  | -0.165908163 | -2.009236284  |
| H235 | -14.736426912 | 0.497215050  | -1.703920205  |
| H236 | -9.962325504  | -1.619082696 | -2.251463605  |
| H237 | -5.885165976  | -2.642868461 | -1.695799264  |
| H238 | -5.181589158  | -5.632428438 | -0.131241366  |
| H239 | -7.411980604  | -4.886225904 | -4.840259984  |

|      |               |              |              |
|------|---------------|--------------|--------------|
| H240 | -1.456742187  | 0.703439427  | -3.400325893 |
| H241 | -6.401374732  | -6.342856409 | -4.758172167 |
| H242 | 3.597789740   | 7.200317076  | 7.756653459  |
| H243 | 2.537911671   | 6.594881966  | 6.666672457  |
| H244 | -2.815874127  | 5.998238585  | -0.077237953 |
| H245 | -4.851894151  | 3.913714949  | 0.164681650  |
| H246 | -4.798930591  | 7.353332717  | 1.022599509  |
| H247 | -4.051606912  | 0.968732800  | -3.235101576 |
| H248 | -5.191400739  | 0.950557861  | -5.015414466 |
| H249 | -6.158248934  | 1.783891469  | -4.056025441 |
| H250 | -3.081843218  | -0.954541054 | -5.992379057 |
| H251 | -4.108150810  | -2.101371103 | -6.901174174 |
| H252 | -8.059276348  | 9.494787713  | -1.923947984 |
| H253 | -9.757061331  | 9.230607211  | -2.423960047 |
| H254 | -6.441833976  | 7.866778432  | -2.466517241 |
| H255 | -6.893752755  | 6.297974530  | -3.070372455 |
| H256 | -5.980750078  | 7.049282605  | -6.327528765 |
| H257 | -2.663756781  | 3.822032793  | -6.015715971 |
| H258 | -10.401457165 | 2.056649660  | -3.852307619 |
| H259 | -8.388699637  | 4.044920666  | 0.242703306  |
| H260 | -7.020492771  | 4.068246632  | -4.755899718 |
| H261 | -1.413847538  | 5.594314979  | -2.412444537 |
| H262 | -2.050426147  | 7.754345535  | -1.465942341 |
| H263 | -2.924529626  | 3.762557947  | -3.323468175 |
| H264 | -4.471844914  | -5.021633946 | -4.963165648 |
| H265 | -2.882626531  | 10.815405404 | -1.956555674 |
| H266 | -2.176868084  | -3.461861606 | -5.615692774 |
| H267 | -1.657016059  | 6.515977565  | -3.898297807 |
| H268 | -6.939165130  | 3.417214219  | -1.651858693 |
| H269 | -5.845690394  | -1.106276077 | -5.418309350 |
| H270 | -4.015518880  | 10.492423693 | -0.623394849 |
| H271 | -4.364209063  | 6.541934249  | -6.655671641 |
| H272 | -7.530469788  | 5.445633301  | -5.680037390 |
| H273 | 0.375909109   | -4.575054288 | -5.418760609 |
| H274 | -1.057266116  | -5.658102756 | -3.385972144 |
| H275 | -11.864584499 | 2.794395145  | -1.993663107 |
| H276 | -3.894220302  | -1.896408669 | -3.842273813 |
| H277 | -4.089816857  | 6.761170831  | -3.387621093 |
| H278 | -2.882828991  | 5.549792853  | -5.789981624 |
| H279 | -1.390921493  | 4.046143850  | -4.135977948 |
| H280 | -4.822397305  | 3.400749991  | -4.938477103 |
| H281 | -6.874152093  | 7.005594260  | 2.980522292  |
| H282 | -7.451592741  | 7.327524722  | -0.283651655 |
| H283 | -9.508753916  | 9.388757570  | 0.030242292  |
| H284 | -6.026625728  | 8.498264301  | 2.526378635  |
| H285 | -9.623240257  | 6.071298619  | 0.433252118  |
| H286 | 8.070272870   | 3.675595429  | -5.921336665 |
| H287 | 8.755789983   | 2.286583521  | -5.054665085 |
| H288 | 10.180742104  | 2.764109449  | -0.845669844 |
| H289 | 10.205919403  | 2.845138689  | -6.863220777 |
| H290 | 9.433411981   | 1.473621360  | -7.327856381 |
| H291 | 0.393077453   | 7.342340686  | 2.225811090  |
| H292 | -1.898974681  | 9.014391537  | 3.462053464  |
| H293 | -1.114567553  | 10.077265720 | -0.635937532 |
| H294 | -1.347553321  | 6.902517040  | 2.189763153  |
| H295 | -1.207808458  | 10.441794908 | 3.062706883  |
| H296 | 3.700430527   | 7.580804426  | -3.451709902 |
| H297 | -0.095252256  | 9.516526431  | 1.206721536  |
| H298 | 6.410559398   | -2.973796544 | 6.863583470  |
| H299 | 9.026083269   | -1.956676973 | 5.626625649  |
| H300 | 3.605750098   | 5.478246714  | -4.297568338 |
| H301 | 1.778269552   | 2.004563496  | 4.957685735  |
| H302 | 2.269690728   | 4.335417528  | -7.422397919 |
| H303 | 2.226683123   | -1.143720961 | -4.309747352 |
| H304 | 1.184581525   | 4.082069670  | -6.053482761 |
| H305 | 4.281428266   | -1.757636160 | 5.871146690  |
| H306 | 3.520183901   | 3.535270295  | -4.807899548 |
| H307 | 5.021605211   | -1.789906952 | 4.271454718  |
| H308 | 6.881061732   | -3.051092387 | 5.148681804  |
| H309 | 6.972486505   | -0.478211049 | 5.136429121  |
| H310 | 6.270346587   | -0.497247006 | 6.767108150  |
| H311 | -0.636405554  | -1.561071349 | -8.028173595 |
| H312 | 8.488067022   | -4.396451254 | 7.287546667  |

|       |               |               |              |
|-------|---------------|---------------|--------------|
| H313  | 10.167364563  | -6.345329592  | 5.569298167  |
| H314  | 1.744310557   | 1.104789906   | -3.335955135 |
| H315  | 9.997800308   | -6.084046901  | 8.465139959  |
| H316  | 9.358455857   | -7.223457290  | 7.477990454  |
| H317  | 4.759872068   | 0.594658109   | 4.078603673  |
| H318  | 0.108920191   | 2.592981416   | -4.438416960 |
| H319  | 1.078610886   | -1.879250596  | -6.382882849 |
| H320  | 12.174600902  | -1.889764074  | 2.251433153  |
| H321  | 10.832814863  | -0.186180621  | -0.315270672 |
| H322  | 9.848456484   | -1.813285379  | 2.989920864  |
| H323  | 12.551045492  | -2.519392572  | 0.893193078  |
| H324  | 4.514338034   | 8.005884690   | -6.111788993 |
| H325  | 7.715880621   | 0.463212002   | 2.620273159  |
| H326  | 6.361126639   | -4.013396150  | 2.016143043  |
| H327  | 6.021112977   | 3.061693799   | -5.115075497 |
| H328  | 8.485128720   | -4.418572390  | 0.668484133  |
| H329  | 9.140166176   | -0.723234705  | -4.874700093 |
| H330  | 6.930899376   | -0.753810903  | -3.618962380 |
| H331  | 11.439969897  | -5.784939423  | 6.661450392  |
| H332  | 3.054894748   | 1.950229542   | 3.779733960  |
| H333  | 9.184513448   | 0.869167025   | 4.500356631  |
| H334  | 7.180227129   | 1.838550336   | 3.107896117  |
| H335  | 9.570713181   | -0.098356379  | 6.648250471  |
| H336  | 2.985411448   | -0.578533303  | 6.974636061  |
| H337  | 11.094245206  | -5.532153021  | -1.968111396 |
| H338  | 9.071840256   | -2.615185172  | -1.737324959 |
| H339  | 9.719868805   | -2.283868014  | -0.120457956 |
| H340  | 7.714052718   | -4.469248660  | -0.941389187 |
| H341  | 4.388745487   | 1.321315181   | -4.743376589 |
| H342  | -1.041711596  | 1.875779024   | -6.554454035 |
| H343  | -1.685334615  | -0.124613241  | -8.050940699 |
| H344  | 5.156995046   | -2.885353272  | 1.316701683  |
| H345  | 10.329561072  | -0.177667077  | 4.448978840  |
| H346  | 10.791314647  | -2.348514927  | 4.106297724  |
| H347  | 1.536351427   | 0.236105842   | 6.514459410  |
| H348  | 11.073938406  | 0.099036462   | -3.400180870 |
| H349  | 9.368334444   | 0.631549193   | 0.231440321  |
| H350  | 4.828265682   | 0.619911400   | -6.326327153 |
| H351  | 2.135423138   | 7.939814567   | -4.210901331 |
| H352  | 3.387508385   | 3.087955784   | 7.062555507  |
| H353  | 3.767423179   | 4.143037987   | 5.682544500  |
| H354  | 12.401867280  | 2.902834510   | -1.563307796 |
| H355  | 12.721480133  | 1.329973198   | -1.245216293 |
| H356  | 13.135111830  | 0.847044848   | 3.226112384  |
| H357  | 12.101573045  | 0.407652079   | 1.236985365  |
| H358  | 13.920074820  | 3.117106492   | 1.916077731  |
| H359  | 11.697071989  | 1.819980054   | 3.619306615  |
| H360  | 5.804583036   | 5.352007756   | 7.090736970  |
| H361  | -12.335138078 | 6.522538603   | 1.935924156  |
| H362  | 9.504662187   | -0.229459940  | 9.655809597  |
| H363  | 7.799600033   | 1.556941731   | 8.392900719  |
| H364  | -12.142843425 | 5.513862488   | -0.911999829 |
| H365  | -10.655093696 | 3.989693737   | 1.315621008  |
| H366  | -12.057649726 | 3.385898748   | 0.417755641  |
| H367  | -8.268941792  | 1.947194462   | -4.623177161 |
| H368  | 1.144700996   | 0.050248768   | 1.057709376  |
| H369  | -0.736395226  | -0.582316182  | -1.297235618 |
| Mo370 | 6.195664332   | -0.021495984  | -0.447708036 |
| N371  | 0.717397451   | -9.137861071  | -3.700700693 |
| N372  | -2.944365870  | -9.135641264  | -2.979965646 |
| N373  | -3.590244628  | -10.152628502 | -0.419121557 |
| N374  | -1.277474940  | -9.589358074  | 1.068036782  |
| N375  | -1.305232391  | -6.726010737  | 1.083276809  |
| N376  | -3.728637614  | -6.337919127  | 2.536508035  |
| N377  | -3.296879186  | -7.716552891  | 5.032999544  |
| N378  | -0.684891544  | -7.030408751  | 6.025335350  |
| N379  | -0.192499332  | -4.311486940  | 5.635735502  |
| N380  | -2.570574900  | -2.514373833  | 5.769262291  |
| N381  | -4.044144900  | -3.862107304  | 7.878046845  |
| N382  | 9.520416618   | -6.219938613  | 7.571546984  |
| N383  | 8.947627389   | -3.773294072  | 6.614164285  |
| N384  | 4.339001967   | 0.084803082   | 4.862969545  |
| N385  | 2.467206152   | -0.079465213  | 6.259731883  |

|      |               |              |              |
|------|---------------|--------------|--------------|
| N386 | 2.492400747   | 1.441216099  | 4.497821248  |
| N387 | 9.325341660   | -0.442860543 | 7.602730504  |
| N388 | -0.637491257  | -4.756455866 | -5.301484822 |
| N389 | 3.714771409   | -4.022130644 | -3.522313081 |
| N390 | -2.828954824  | -3.389134204 | -4.816303169 |
| N391 | -5.343489082  | -4.550452635 | -4.731814770 |
| N392 | -5.805226387  | -4.967586661 | -2.035360097 |
| N393 | -5.903610732  | -2.523300168 | -0.684160687 |
| N394 | -3.445717031  | 0.422959452  | -2.572565892 |
| N395 | -1.728159231  | -0.464128192 | -1.600227611 |
| N396 | -8.349915455  | -1.253825219 | -0.374737985 |
| N397 | -12.048859458 | -0.518920907 | -3.098664093 |
| N398 | -13.823237309 | 0.107614619  | -1.923487810 |
| N399 | 3.489743056   | 6.491313506  | 7.027489605  |
| N400 | -1.051344544  | 9.429261074  | 3.062369860  |
| N401 | -2.049261246  | 9.821980675  | -0.327900010 |
| N402 | -2.932883729  | 7.765883291  | -2.000464236 |
| N403 | -4.533060680  | 4.334782192  | -5.278044224 |
| N404 | -5.223874648  | 6.400492182  | -6.137743412 |
| N405 | -6.773902213  | 4.941040667  | -5.227161495 |
| N406 | -3.733375563  | 5.595585618  | -0.322794114 |
| N407 | -5.682493448  | 6.887963649  | 1.254506372  |
| N408 | -8.167076808  | 7.829229132  | 0.246058894  |
| N409 | -7.184493255  | 7.182807897  | -2.655794701 |
| N410 | -10.526127842 | 6.390647688  | 0.090808238  |
| N411 | 9.297518760   | 2.472629535  | -7.147643746 |
| N412 | 5.974672865   | 2.248934869  | -5.739580586 |
| N413 | 3.184453239   | 3.449295492  | -5.785769165 |
| N414 | 3.128108422   | 6.183258144  | -4.875048107 |
| N415 | 4.364545648   | 0.087586462  | -9.666389440 |
| N416 | 1.575992711   | -0.041089442 | -9.086053200 |
| N417 | 11.980080739  | 1.970170183  | -1.546382040 |
| N418 | 8.086461720   | -0.012962857 | -1.958647666 |
| N419 | 9.037869809   | -0.424287872 | -3.908696292 |
| N420 | 12.021492025  | 1.372516665  | 1.559248730  |
| N421 | -1.707108419  | 2.415957787  | -0.499481795 |
| N422 | -0.574462703  | 2.416852996  | -0.481383365 |
| O423 | -1.215380093  | -8.307685871 | -1.749931621 |
| O424 | -4.317259989  | -8.075575312 | 0.175566390  |
| O425 | -2.498268191  | -9.783762948 | 2.988564921  |
| O426 | -0.297909624  | -6.871904245 | 3.117443478  |
| O427 | -2.826661806  | -4.401924510 | 3.316369587  |
| O428 | -4.565798161  | -6.072264346 | 5.982758323  |
| O429 | -1.443182716  | -7.504226621 | 8.140979730  |
| O430 | 1.786769529   | -4.435096760 | 6.798189661  |
| O431 | -1.065391419  | -1.306558594 | 6.996108658  |
| O432 | -4.175183026  | -1.789909407 | 8.795706699  |
| O433 | -3.692113116  | -4.131972814 | 11.436833679 |
| O434 | 10.827586367  | -3.702459780 | 5.265559488  |
| O435 | 8.352307391   | -2.111531934 | 8.847973066  |
| O436 | 9.142874972   | 2.606262384  | 9.512131375  |
| O437 | -3.004407085  | -4.065735797 | -2.630946372 |
| O438 | 2.126367390   | -4.110398300 | -5.146879825 |
| O439 | -6.337867303  | -2.529337343 | -4.350486466 |
| O440 | -5.102813552  | -0.603143479 | -5.837476076 |
| O441 | -7.886626975  | -5.843664578 | -2.476601490 |
| O442 | -5.918186205  | -3.580195649 | 1.344085859  |
| O443 | -7.458772637  | 0.224691829  | 1.120894020  |
| O444 | -11.042597439 | -0.125865773 | 1.626837177  |
| O445 | 5.562788467   | 4.247614957  | 8.791831561  |
| O446 | -2.368651819  | 4.470258746  | 5.285570469  |
| O447 | -3.316703379  | 8.806822401  | 1.268724501  |
| O448 | -4.863424479  | 8.919867044  | -2.460544137 |
| O449 | -5.119666626  | 4.952853818  | -2.028866022 |
| O450 | -6.632338093  | 4.858483056  | 1.726670790  |
| O451 | -3.291428176  | 5.443269562  | 2.695937695  |
| O452 | -8.607776124  | 8.908852026  | 2.216171863  |
| O453 | -11.643294497 | 8.129047733  | -0.879178956 |
| O454 | -9.357779993  | 6.783616995  | -3.245483760 |
| O455 | -13.856802177 | 5.469971675  | 1.071688898  |
| O456 | -7.730665758  | 2.363864343  | -3.922591327 |
| O457 | 7.192594643   | 0.689723533  | -6.910309194 |
| O458 | 3.212878291   | 2.090633723  | -7.633390630 |



|                                                                                                                                                                                            |                    |              |               |               |
|--------------------------------------------------------------------------------------------------------------------------------------------------------------------------------------------|--------------------|--------------|---------------|---------------|
|                                                                                                                                                                                            | O459               | 1.680948658  | 6.698310332   | -6.553591149  |
|                                                                                                                                                                                            | O460               | 3.735698844  | 9.715761677   | -5.313627952  |
|                                                                                                                                                                                            | O461               | 1.597507575  | -2.089761237  | -10.090399355 |
|                                                                                                                                                                                            | O462               | 5.632554546  | -3.652526143  | -5.930225280  |
|                                                                                                                                                                                            | O463               | 6.541459427  | -1.621567777  | -5.782517102  |
|                                                                                                                                                                                            | O464               | -1.253459310 | 2.089300447   | -9.228495635  |
|                                                                                                                                                                                            | O465               | 11.271426334 | 3.492926388   | 1.282234245   |
|                                                                                                                                                                                            | O466               | 13.613467202 | 3.601015438   | 3.875102446   |
|                                                                                                                                                                                            | O467               | 4.431182101  | -4.574854360  | -0.566156449  |
|                                                                                                                                                                                            | O468               | 5.826287335  | -5.977115054  | 0.449128739   |
|                                                                                                                                                                                            | O469               | 11.685923329 | -3.804014027  | -0.588673648  |
|                                                                                                                                                                                            | O470               | 10.267489990 | -5.013930592  | -1.864681492  |
|                                                                                                                                                                                            | O471               | 7.642973732  | -0.632488223  | 1.167908575   |
|                                                                                                                                                                                            | O472               | 8.361310976  | -2.409712391  | 2.350066525   |
|                                                                                                                                                                                            | O473               | 6.529825507  | -2.074963765  | -0.716908173  |
|                                                                                                                                                                                            | O474               | 9.973966602  | 0.558920605   | 5.013476196   |
|                                                                                                                                                                                            | O475               | 7.690193072  | 1.061374202   | 3.410424411   |
|                                                                                                                                                                                            | O476               | -5.223441248 | 1.706283736   | -4.367919102  |
|                                                                                                                                                                                            | O477               | 12.916066815 | -1.943483552  | 1.596128452   |
|                                                                                                                                                                                            | O478               | 10.727605433 | -1.626528815  | 3.428876233   |
|                                                                                                                                                                                            | S479               | -0.360184446 | 6.768094310   | -0.022108689  |
|                                                                                                                                                                                            | S480               | 1.237055793  | 4.073978241   | -2.073362284  |
|                                                                                                                                                                                            | S481               | 4.786749170  | 0.154852938   | -2.397192095  |
|                                                                                                                                                                                            | S482               | 1.018678896  | 3.607613187   | 1.565871830   |
|                                                                                                                                                                                            | S483               | 1.301714105  | 0.144322272   | -0.292570684  |
|                                                                                                                                                                                            | S484               | 4.926094075  | 3.919137344   | -2.961068291  |
|                                                                                                                                                                                            | S485               | 4.519066177  | -0.338303865  | 1.251754439   |
|                                                                                                                                                                                            | S486               | 3.469136740  | 5.811472413   | 0.109205899   |
|                                                                                                                                                                                            | S487               | 6.769295550  | 2.258193302   | -0.091488001  |
|                                                                                                                                                                                            | S488               | 4.671547718  | 3.135712530   | 2.804375940   |
| C 47(3/2)<br>TS<br>Fe( 139) 0.535 2.264<br>Fe( 140) 0.503 -1.471<br>Fe( 141) 0.574 2.831<br>Fe( 142) 0.545 -2.527<br>Fe( 143) 0.559 2.922<br>Fe( 144) 0.517 -2.298<br>Fe( 145) 0.330 1.001 | bm22b6x2n2x47dtg_1 | 53086.969    |               |               |
|                                                                                                                                                                                            | C1                 | -1.616695130 | -8.934679225  | -2.743864785  |
|                                                                                                                                                                                            | C2                 | -0.657383561 | -9.609369829  | -3.730438010  |
|                                                                                                                                                                                            | C3                 | -3.960687949 | -8.474844222  | -2.173462641  |
|                                                                                                                                                                                            | C4                 | -3.966940601 | -8.883979938  | -0.701820059  |
|                                                                                                                                                                                            | C5                 | -3.499199799 | -10.615633783 | 0.957557996   |
|                                                                                                                                                                                            | C6                 | -2.382924897 | -9.945723900  | 1.765900202   |
|                                                                                                                                                                                            | C7                 | -0.207547308 | -8.824844614  | 1.701349896   |
|                                                                                                                                                                                            | C8                 | -0.602014432 | -7.381882206  | 2.030588688   |
|                                                                                                                                                                                            | C9                 | -1.811276524 | -5.379144702  | 1.344210444   |
|                                                                                                                                                                                            | C10                | -2.836939753 | -5.324158526  | 2.486665347   |
|                                                                                                                                                                                            | C11                | -4.741996906 | -6.348570403  | 3.587179457   |
|                                                                                                                                                                                            | C12                | -4.182747624 | -6.687004173  | 4.975461770   |
|                                                                                                                                                                                            | C13                | -2.823556386 | -8.225239675  | 6.308245453   |
|                                                                                                                                                                                            | C14                | -1.592231923 | -7.537485098  | 6.911563348   |
|                                                                                                                                                                                            | C15                | 0.589644364  | -6.491660813  | 6.472484935   |
|                                                                                                                                                                                            | C16                | 0.779152031  | -4.978397895  | 6.326488570   |
|                                                                                                                                                                                            | C17                | -0.153569035 | -2.878897879  | 5.389812996   |
|                                                                                                                                                                                            | C18                | -1.297310128 | -2.171553034  | 6.138086594   |
|                                                                                                                                                                                            | C19                | -0.112965793 | -2.545098197  | 3.874346928   |
|                                                                                                                                                                                            | C20                | -0.293209123 | -1.045557362  | 3.614290215   |
|                                                                                                                                                                                            | C21                | 1.184999072  | -3.064010291  | 3.245305667   |
|                                                                                                                                                                                            | C22                | -3.731175941 | -1.899851092  | 6.407796546   |
|                                                                                                                                                                                            | C23                | -3.999183626 | -2.500120219  | 7.800796952   |
|                                                                                                                                                                                            | C24                | -4.965262428 | -1.970555780  | 5.478269757   |
|                                                                                                                                                                                            | C25                | -6.221620249 | -1.446446853  | 6.183454235   |
|                                                                                                                                                                                            | C26                | -4.712951447 | -1.189316497  | 4.181859596   |
|                                                                                                                                                                                            | C27                | -4.362315128 | -4.482449535  | 9.150420228   |
|                                                                                                                                                                                            | C28                | -3.410665802 | -4.066204835  | 10.254327335  |
|                                                                                                                                                                                            | C29                | 10.355838010 | -5.742670445  | 6.470279455   |
|                                                                                                                                                                                            | C30                | 10.065679509 | -4.296420413  | 6.066201201   |
|                                                                                                                                                                                            | C31                | 8.458839904  | -2.419545279  | 6.445947567   |
|                                                                                                                                                                                            | C32                | 8.708925608  | -1.644833912  | 7.755254535   |
|                                                                                                                                                                                            | C33                | 6.968559834  | -2.447342484  | 6.070230795   |
|                                                                                                                                                                                            | C34                | 6.359662235  | -1.063647928  | 5.829316265   |
|                                                                                                                                                                                            | C35                | 4.959155840  | -1.192521590  | 5.228791855   |
|                                                                                                                                                                                            | C36                | 3.136756159  | 0.525204665   | 5.225781934   |
|                                                                                                                                                                                            | C37                | 9.679254091  | 0.368516657   | 8.751029292   |
|                                                                                                                                                                                            | C38                | 8.806186795  | 1.596340695   | 8.912633077   |
|                                                                                                                                                                                            | C39                | -0.985203560 | -4.660759785  | -3.875929627  |
|                                                                                                                                                                                            | C40                | -2.369812047 | -4.019408367  | -3.703969974  |
|                                                                                                                                                                                            | C41                | 0.025332767  | -3.805968328  | -3.075155302  |

|      |               |              |              |
|------|---------------|--------------|--------------|
| C42  | 1.411162131   | -4.438755200 | -2.839277884 |
| C43  | 2.444574341   | -4.171197890 | -3.931394630 |
| C44  | -3.974554342  | -2.498754975 | -4.759442547 |
| C45  | -5.322367695  | -3.207476053 | -4.610085741 |
| C46  | -4.020311852  | -1.524035119 | -5.954294507 |
| C47  | -6.522284969  | -5.319259986 | -4.374891532 |
| C48  | -6.801289689  | -5.395759226 | -2.866803803 |
| C49  | -5.942696746  | -4.998650593 | -0.595350080 |
| C50  | -5.918425294  | -3.643369958 | 0.109805048  |
| C51  | -5.900513269  | -1.192163520 | -0.100516695 |
| C52  | -7.311545305  | -0.704602935 | 0.313337049  |
| C53  | -5.365614094  | -0.132429866 | -1.075933864 |
| C54  | -3.922400471  | -0.218105046 | -1.458551452 |
| C55  | -2.809408053  | -0.781084782 | -0.882706733 |
| C56  | -2.142129542  | 0.303265976  | -2.703066285 |
| C57  | -9.695900629  | -0.725366132 | -0.317270087 |
| C58  | -10.259464627 | -0.920121276 | 1.085977948  |
| C59  | -10.557039342 | -1.498116141 | -1.350511541 |
| C60  | -11.827369948 | -0.824097031 | -1.776353537 |
| C61  | -12.924647628 | -0.430016871 | -1.034311895 |
| C62  | -13.233182144 | 0.038085310  | -3.178128401 |
| C63  | 3.646013431   | 5.158140285  | 7.612135397  |
| C64  | 5.121370246   | 4.898537343  | 7.857959235  |
| C65  | 3.163097521   | 4.071193976  | 6.617142289  |
| C66  | 1.691618468   | 4.175036793  | 6.289217404  |
| C67  | 0.718771876   | 3.546098546  | 7.088925273  |
| C68  | 1.252541735   | 4.896017338  | 5.163607271  |
| C69  | -0.642855534  | 3.623752235  | 6.774911724  |
| C70  | -0.102339749  | 4.991821529  | 4.844569481  |
| C71  | -1.049515796  | 4.354184906  | 5.652269540  |
| C72  | -0.920210010  | 8.960670192  | 1.665894532  |
| C73  | -2.204899123  | 9.183506162  | 0.857153502  |
| C74  | -0.549621693  | 7.469840041  | 1.680898171  |
| C75  | -3.187007424  | 10.077819659 | -1.207711574 |
| C76  | -3.735184372  | 8.855012028  | -1.944705547 |
| C77  | -3.359262647  | 6.508856682  | -2.602931538 |
| C78  | -4.136065088  | 5.607292192  | -1.617779619 |
| C79  | -2.136357500  | 5.805878560  | -3.222820147 |
| C80  | -2.381960673  | 4.492906102  | -3.974258396 |
| C81  | -3.084126543  | 4.590162508  | -5.342941810 |
| C82  | -5.498256015  | 5.216556189  | -5.580430343 |
| C83  | -4.455830353  | 4.809574919  | 0.668676633  |
| C84  | -5.699549850  | 5.519169828  | 1.244198639  |
| C85  | -3.581606758  | 4.356282849  | 1.845177783  |
| C86  | -6.575382900  | 7.624142973  | 2.132302681  |
| C87  | -7.867499738  | 8.183588484  | 1.539386946  |
| C88  | -9.271158946  | 8.450622559  | -0.470977561 |
| C89  | -10.588941226 | 7.645098499  | -0.429957133 |
| C90  | -8.883322970  | 8.771556674  | -1.933533907 |
| C91  | -8.506102138  | 7.508455860  | -2.698582145 |
| C92  | -11.647282130 | 5.481941851  | 0.083357044  |
| C93  | -12.690504807 | 5.877464494  | 1.123262455  |
| C94  | -11.160317680 | 4.028926230  | 0.344053953  |
| C95  | -10.247207060 | 3.517664866  | -0.747948915 |
| C96  | -10.784368227 | 2.926458796  | -1.902978439 |
| C97  | -8.851712461  | 3.653839200  | -0.663594270 |
| C98  | -9.965417208  | 2.511678319  | -2.955761810 |
| C99  | -8.016142928  | 3.266430532  | -1.716510953 |
| C100 | -8.586592476  | 2.705286975  | -2.856551325 |
| C101 | 8.344800735   | 2.630618047  | -6.039807600 |
| C102 | 7.107923594   | 1.778175757  | -6.274660375 |
| C103 | 4.687299017   | 1.550327007  | -5.771548178 |
| C104 | 3.617316202   | 2.377912281  | -6.491302146 |
| C105 | 2.210867492   | 4.379250813  | -6.345892826 |
| C106 | 2.324631480   | 5.844970373  | -5.935133483 |
| C107 | 3.129216934   | 7.551771016  | -4.404966234 |
| C108 | 3.876299495   | 8.494159576  | -5.326666295 |
| C109 | 3.735557041   | -1.203546318 | -9.352801087 |
| C110 | 2.215709758   | -1.145772084 | -9.551531755 |
| C111 | 4.055435113   | -1.821611365 | -7.972131342 |
| C112 | 5.528254186   | -2.266599196 | -7.891399753 |
| C113 | 5.911179417   | -2.589258887 | -6.464545727 |
| C114 | 0.134345663   | 0.084010678  | -9.163032676 |

|       |              |               |              |
|-------|--------------|---------------|--------------|
| C115  | -0.226165065 | 1.506605400   | -9.544595871 |
| C116  | -0.645451887 | -0.480568976  | -7.947446391 |
| C117  | -0.063468258 | -0.052742099  | -6.621349169 |
| C118  | -0.351014591 | 1.206650068   | -6.064396771 |
| C119  | 0.858764007  | -0.883740309  | -5.959418650 |
| C120  | 0.293426341  | 1.629188836   | -4.896438999 |
| C121  | 1.503817655  | -0.459803665  | -4.792202413 |
| C122  | 1.232305364  | 0.805472066   | -4.262080987 |
| C123  | 10.880550958 | 1.963638428   | -0.569167909 |
| C124  | 11.386597762 | 2.331721887   | 0.833374351  |
| C125  | 10.139686929 | 0.616653514   | -0.578116361 |
| C126  | 9.454782937  | 0.256894149   | -1.860241806 |
| C127  | 10.044069295 | 0.007789463   | -3.084936471 |
| C128  | 7.875154116  | -0.421779465  | -3.205959240 |
| C129  | 12.526236195 | 1.681493609   | 2.878849472  |
| C130  | 13.415083469 | 2.905454071   | 2.880419990  |
| C131  | 5.347337504  | -4.709593971  | 0.262405664  |
| C132  | 5.954029562  | -3.607278755  | 1.082228843  |
| C133  | 7.083232246  | -2.807121622  | 0.318013544  |
| C134  | 8.169869975  | -3.796801458  | -0.184380228 |
| C135  | 9.384149556  | -3.074658647  | -0.793266002 |
| C136  | 10.562652795 | -3.974889223  | -1.031804280 |
| C137  | 7.756817510  | -1.887565917  | 1.385316932  |
| C138  | 3.492168993  | 2.471129874   | -0.271087748 |
| Fe139 | 4.991801342  | 2.161055501   | -1.532764826 |
| Fe140 | 1.502218857  | 2.385807748   | -0.350047304 |
| Fe141 | 3.240851969  | 3.791625302   | 1.205603763  |
| Fe142 | 3.298994130  | 4.086259271   | -1.383754438 |
| Fe143 | 1.189028746  | 5.048191130   | -0.095911832 |
| Fe144 | 4.879177509  | 1.858186301   | 1.012582278  |
| Fe145 | 3.548670595  | 0.243913952   | -0.588933955 |
| H146  | 1.065672791  | -9.152631401  | -2.740289447 |
| H147  | 0.765958693  | -8.169087011  | -4.008726911 |
| H148  | -3.227202155 | -9.587843665  | -3.845908141 |
| H149  | -1.058192988 | -9.510618268  | -4.751027685 |
| H150  | -0.677009326 | -10.688688041 | -3.498104536 |
| H151  | -3.820870051 | -7.384400016  | -2.186784466 |
| H152  | -3.329040623 | -10.774916269 | -1.181834570 |
| H153  | -4.945342442 | -8.702634293  | -2.604281785 |
| H154  | -3.325054141 | -11.699594521 | 0.949789380  |
| H155  | -1.300085710 | -9.617068604  | 0.050729276  |
| H156  | -4.440845906 | -10.424130424 | 1.487959416  |
| H157  | -0.987722047 | -4.709167743  | 1.626205181  |
| H158  | -1.475148206 | -7.154342150  | 0.170320333  |
| H159  | 0.662230548  | -8.823030018  | 1.029471850  |
| H160  | -5.225301567 | -5.365754644  | 3.660137587  |
| H161  | -3.780105045 | -7.029396026  | 1.786493827  |
| H162  | 0.085464105  | -9.300457140  | 2.645418503  |
| H163  | -2.268604766 | -4.997338771  | 0.420164313  |
| H164  | -3.085238024 | -8.255717710  | 4.187907571  |
| H165  | -5.504835673 | -7.094314326  | 3.325084129  |
| H166  | 1.310801072  | -4.142663496  | 3.415248909  |
| H167  | 1.182378251  | -2.887124940  | 2.158620565  |
| H168  | 2.061405039  | -2.543802781  | 3.660747269  |
| H169  | -0.959982013 | -3.072640017  | 3.406841263  |
| H170  | -2.577211573 | -9.289130900  | 6.181182637  |
| H171  | -3.845576139 | -1.572139522  | 3.626856585  |
| H172  | -4.020347608 | -4.446932566  | 7.049192009  |
| H173  | -6.478158319 | -2.036268384  | 7.075259795  |
| H174  | -0.304119667 | -0.855677490  | 2.530403648  |
| H175  | 0.532070873  | -0.454916770  | 4.038444928  |
| H176  | 3.114940189  | 5.003866867   | 8.570808360  |
| H177  | -5.590031698 | -1.262798395  | 3.522028656  |
| H178  | -7.079297502 | -1.482730344  | 5.496028498  |
| H179  | -4.541263883 | -0.124176354  | 4.405390880  |
| H180  | -6.083091356 | -0.398840621  | 6.497004206  |
| H181  | -5.132392533 | -3.032477685  | 5.218651193  |
| H182  | -3.486138408 | -0.844385780  | 6.600978051  |
| H183  | -2.714379738 | -3.166335323  | 4.997843453  |
| H184  | -1.239719536 | -0.661487756  | 4.025488787  |
| H185  | -2.643502952 | 3.930905785   | 1.452633127  |
| H186  | -4.136951405 | 3.559271368   | 2.365635483  |
| H187  | -2.971275310 | 5.089592625   | 3.554882303  |

|      |               |              |               |
|------|---------------|--------------|---------------|
| H188 | -2.931782780  | 3.948300808  | 5.896279068   |
| H189 | -0.424567989  | 5.534549986  | 3.956119265   |
| H190 | 1.987548059   | 5.360432741  | 4.501698996   |
| H191 | 1.027168514   | 2.971952825  | 7.967353110   |
| H192 | -0.944146458  | -4.867903279 | 5.234873594   |
| H193 | 1.411317033   | -6.972409856 | 5.920704520   |
| H194 | 0.712337927   | -6.730698889 | 7.536423172   |
| H195 | -0.793301939  | -7.204821278 | 5.023854868   |
| H196 | -3.621758279  | -8.142322806 | 7.056369948   |
| H197 | -1.383890050  | 3.115172464  | 7.398059887   |
| H198 | 0.768391224   | -2.516825872 | 5.863809869   |
| H199 | -5.394975857  | -4.275890274 | 9.477270367   |
| H200 | -4.262729734  | -5.571480496 | 9.022082431   |
| H201 | -2.400639787  | -3.740405456 | 9.909940840   |
| H202 | 10.735113420  | 0.676030621  | 8.712417861   |
| H203 | 4.443809139   | -3.846368191 | -4.219524498  |
| H204 | 6.518132890   | -5.934179618 | 1.181712317   |
| H205 | 5.667876412   | -3.172446810 | -8.498811249  |
| H206 | 6.184578718   | -1.479068601 | -8.288620914  |
| H207 | 3.408134079   | -2.690661961 | -7.782086199  |
| H208 | 0.536904588   | 2.011880425  | -10.181701697 |
| H209 | 4.068505469   | -1.919557911 | -10.119742274 |
| H210 | 0.138769565   | -2.833373837 | -3.580497721  |
| H211 | 1.317661959   | -5.535293261 | -2.746171711  |
| H212 | 2.105892613   | 0.665928788  | -8.545379082  |
| H213 | -0.154285966  | -0.522144656 | -10.045165684 |
| H214 | 4.237469053   | 0.759378428  | -8.897557901  |
| H215 | 3.971872872   | -3.999425650 | -2.527169340  |
| H216 | 3.827852988   | -1.081667502 | -7.188800551  |
| H217 | 5.380810038   | -0.049010279 | -9.765011715  |
| H218 | -0.849164485  | -5.680810048 | -5.666732932  |
| H219 | -0.428333967  | -3.610937630 | -2.091761954  |
| H220 | 6.696040890   | -0.785187367 | -6.323050564  |
| H221 | 1.806401295   | -4.089757447 | -1.875115708  |
| H222 | 3.475470905   | -1.226167263 | -0.899865292  |
| H223 | -5.303910875  | -1.211906973 | 0.821948268   |
| H224 | -2.693663368  | -1.374358424 | 0.016237398   |
| H225 | -6.908451512  | -5.468158915 | -0.362127763  |
| H226 | -4.885970759  | -4.703768705 | -2.423249843  |
| H227 | -8.142422423  | -2.029581287 | -1.011608216  |
| H228 | -13.146141446 | -0.466331337 | 0.026737554   |
| H229 | -9.933071154  | -1.871948342 | 1.573411584   |
| H230 | -10.751220923 | -2.512816531 | -0.963063329  |
| H231 | -9.692396873  | 0.350489803  | -0.549824044  |
| H232 | -13.726833730 | 0.395830016  | -4.078021325  |
| H233 | -5.540303996  | 0.848544589  | -0.602870307  |
| H234 | -5.981092306  | -0.148198189 | -1.990087753  |
| H235 | -14.715200573 | 0.515669132  | -1.725725077  |
| H236 | -9.948403666  | -1.618077205 | -2.259993593  |
| H237 | -5.851415852  | -2.642853466 | -1.697253447  |
| H238 | -5.163681577  | -5.625828017 | -0.137859151  |
| H239 | -7.416883275  | -4.886145890 | -4.840632235  |
| H240 | -1.504464774  | 0.733396615  | -3.472533214  |
| H241 | -6.405148184  | -6.341253156 | -4.757999293  |
| H242 | 3.593702972   | 7.202084003  | 7.769202010   |
| H243 | 2.533206014   | 6.601124827  | 6.678256813   |
| H244 | -2.806785178  | 6.005240327  | -0.076047003  |
| H245 | -4.831008989  | 3.907437326  | 0.166632226   |
| H246 | -4.797621630  | 7.348043452  | 1.025176853   |
| H247 | -4.094749404  | 0.997528674  | -3.238380564  |
| H248 | -5.188382051  | 0.973501410  | -5.007517371  |
| H249 | -6.156375267  | 1.804792805  | -4.052139954  |
| H250 | -3.085006505  | -0.949073188 | -5.988064608  |
| H251 | -4.123899897  | -2.086046676 | -6.896719601  |
| H252 | -8.056830481  | 9.496509858  | -1.920943659  |
| H253 | -9.754450074  | 9.231534464  | -2.416405020  |
| H254 | -6.440054722  | 7.870968249  | -2.473952673  |
| H255 | -6.894097604  | 6.300812072  | -3.070049163  |
| H256 | -5.996135914  | 7.037095698  | -6.372415673  |
| H257 | -2.662710806  | 3.840518729  | -6.029091414  |
| H258 | -10.399919615 | 2.036471047  | -3.837781320  |
| H259 | -8.386252692  | 4.065578271  | 0.235787145   |
| H260 | -7.018378405  | 4.070156557  | -4.767855599  |

|      |               |              |              |
|------|---------------|--------------|--------------|
| H261 | -1.406074685  | 5.602154196  | -2.423904132 |
| H262 | -2.054093354  | 7.757926891  | -1.460057277 |
| H263 | -2.919300952  | 3.771895141  | -3.337718537 |
| H264 | -4.477441594  | -5.019875855 | -4.970873893 |
| H265 | -2.895063414  | 10.823051904 | -1.959740399 |
| H266 | -2.179122535  | -3.456018005 | -5.615958278 |
| H267 | -1.657281871  | 6.528703760  | -3.903754633 |
| H268 | -6.939137906  | 3.436734910  | -1.658812768 |
| H269 | -5.845360962  | -1.094335043 | -5.394223274 |
| H270 | -4.024654801  | 10.490041690 | -0.628140143 |
| H271 | -4.374604898  | 6.539098928  | -6.684650735 |
| H272 | -7.533072287  | 5.442820488  | -5.692900370 |
| H273 | 0.381101654   | -4.581389147 | -5.410794204 |
| H274 | -1.052118850  | -5.646835420 | -3.378022195 |
| H275 | -11.863518198 | 2.777296503  | -1.982252208 |
| H276 | -3.895125684  | -1.897777168 | -3.838929276 |
| H277 | -4.086943451  | 6.761169103  | -3.386157171 |
| H278 | -2.886195433  | 5.569761858  | -5.795980526 |
| H279 | -1.387339355  | 4.059025059  | -4.149689570 |
| H280 | -4.816239550  | 3.418377353  | -4.931064953 |
| H281 | -6.875272821  | 6.982637371  | 2.976273331  |
| H282 | -7.441918694  | 7.340505387  | -0.282791298 |
| H283 | -9.501335869  | 9.399043324  | 0.036312241  |
| H284 | -6.022092387  | 8.479683416  | 2.541866774  |
| H285 | -9.614519203  | 6.078965848  | 0.439489027  |
| H286 | 8.057270168   | 3.688536412  | -5.947703971 |
| H287 | 8.740793125   | 2.318437006  | -5.051361506 |
| H288 | 10.170776740  | 2.760144904  | -0.838141949 |
| H289 | 10.199918826  | 2.847863409  | -6.856848456 |
| H290 | 9.437782322   | 1.467380347  | -7.301151949 |
| H291 | 0.407890263   | 7.358425534  | 2.206010309  |
| H292 | -1.909181070  | 9.011839070  | 3.448379904  |
| H293 | -1.124563033  | 10.089613610 | -0.640601036 |
| H294 | -1.331653033  | 6.915940565  | 2.220367376  |
| H295 | -1.214845156  | 10.440005628 | 3.059465168  |
| H296 | 3.641407928   | 7.561362615  | -3.429274539 |
| H297 | -0.098540048  | 9.525749153  | 1.198265829  |
| H298 | 6.413678430   | -2.973723049 | 6.865434331  |
| H299 | 9.031514080   | -1.964012524 | 5.628955167  |
| H300 | 3.589400388   | 5.470757037  | -4.310449084 |
| H301 | 1.807835508   | 2.039928776  | 4.938800150  |
| H302 | 2.277686697   | 4.337815435  | -7.440697496 |
| H303 | 2.239038845   | -1.103529173 | -4.302969466 |
| H304 | 1.183809676   | 4.067808234  | -6.086491901 |
| H305 | 4.289768303   | -1.728084142 | 5.913356308  |
| H306 | 3.512598582   | 3.536879412  | -4.815043009 |
| H307 | 5.005145177   | -1.785613552 | 4.301025884  |
| H308 | 6.884731823   | -3.052977511 | 5.153342181  |
| H309 | 6.984042606   | -0.487391603 | 5.130823111  |
| H310 | 6.304410367   | -0.492166663 | 6.769759571  |
| H311 | -0.624241924  | -1.576889909 | -8.023839333 |
| H312 | 8.487320013   | -4.405525088 | 7.285661786  |
| H313 | 10.174678991  | -6.353550568 | 5.573285964  |
| H314 | 1.748101627   | 1.157561953  | -3.365268420 |
| H315 | 9.979754960   | -6.098817131 | 8.466310367  |
| H316 | 9.340034406   | -7.229978513 | 7.469004509  |
| H317 | 4.803316979   | 0.612746660  | 4.111783315  |
| H318 | 0.094205881   | 2.614611804  | -4.469587001 |
| H319 | 1.082424431   | -1.873287456 | -6.363812475 |
| H320 | 12.179781574  | -1.887819219 | 2.256805638  |
| H321 | 10.863318235  | -0.184985548 | -0.344461308 |
| H322 | 9.857840343   | -1.806210455 | 2.991028920  |
| H323 | 12.553771664  | -2.533566509 | 0.904896901  |
| H324 | 4.554312490   | 7.999416518  | -6.062357526 |
| H325 | 7.725571577   | 0.473841907  | 2.622467353  |
| H326 | 6.373006454   | -3.994424744 | 2.023628510  |
| H327 | 6.008851594   | 3.062509757  | -5.113337939 |
| H328 | 8.500150390   | -4.410567314 | 0.667840307  |
| H329 | 9.127139078   | -0.717814960 | -4.881787859 |
| H330 | 6.923415037   | -0.738078908 | -3.613764126 |
| H331 | 11.438733386  | -5.795989491 | 6.673401194  |
| H332 | 3.105223760   | 1.986277169  | 3.780435850  |
| H333 | 9.195348208   | 0.866370328  | 4.505068172  |

|       |               |               |              |
|-------|---------------|---------------|--------------|
| H334  | 7.215486415   | 1.858261184   | 3.111996203  |
| H335  | 9.572902304   | -0.102999837  | 6.651049943  |
| H336  | 2.961243671   | -0.560124606  | 6.969933595  |
| H337  | 11.097873814  | -5.534761871  | -1.959988380 |
| H338  | 9.084692783   | -2.619042401  | -1.748484450 |
| H339  | 9.730776677   | -2.272465560  | -0.132835502 |
| H340  | 7.721839770   | -4.458958091  | -0.939678228 |
| H341  | 4.378027547   | 1.322776232   | -4.739150169 |
| H342  | -1.067178453  | 1.860605257   | -6.568273911 |
| H343  | -1.689973903  | -0.149566169  | -8.054196443 |
| H344  | 5.166302106   | -2.875708582  | 1.312178480  |
| H345  | 10.339842759  | -0.180826914  | 4.455011970  |
| H346  | 10.794934370  | -2.351638081  | 4.108779495  |
| H347  | 1.536572352   | 0.281507068   | 6.492352013  |
| H348  | 11.073428690  | 0.090366601   | -3.412915764 |
| H349  | 9.395651117   | 0.610324816   | 0.227580758  |
| H350  | 4.824593575   | 0.616715222   | -6.320050526 |
| H351  | 2.111047817   | 7.940228882   | -4.248671939 |
| H352  | 3.377966340   | 3.091985524   | 7.072248860  |
| H353  | 3.756128336   | 4.147935422   | 5.691863683  |
| H354  | 12.385951013  | 2.934120776   | -1.568186862 |
| H355  | 12.726479497  | 1.363627572   | -1.263739340 |
| H356  | 13.142665658  | 0.832520809   | 3.215126871  |
| H357  | 12.110811805  | 0.405018770   | 1.222411003  |
| H358  | 13.937147865  | 3.105978212   | 1.913849466  |
| H359  | 11.709425487  | 1.810011232   | 3.607411416  |
| H360  | 5.796888104   | 5.340641143   | 7.086256889  |
| H361  | -12.325447880 | 6.553964304   | 1.932772542  |
| H362  | 9.535796083   | -0.246307927  | 9.655914956  |
| H363  | 7.797037888   | 1.530350329   | 8.437876421  |
| H364  | -12.138487149 | 5.524731560   | -0.901673484 |
| H365  | -10.650301837 | 3.993147561   | 1.320006934  |
| H366  | -12.055245911 | 3.394721688   | 0.419896941  |
| H367  | -8.270966522  | 1.935245616   | -4.618074056 |
| H368  | 0.976784514   | -0.175822994  | 0.805168410  |
| H369  | -0.717754989  | -0.565080557  | -1.414704150 |
| Mo370 | 6.204245847   | -0.024124135  | -0.453204691 |
| N371  | 0.718855451   | -9.143775736  | -3.702799335 |
| N372  | -2.944538900  | -9.135437338  | -2.979681033 |
| N373  | -3.585285294  | -10.153254197 | -0.418719064 |
| N374  | -1.274936448  | -9.584980408  | 1.069730578  |
| N375  | -1.312990597  | -6.721534749  | 1.080508716  |
| N376  | -3.736477075  | -6.335069699  | 2.536412428  |
| N377  | -3.299193457  | -7.716913960  | 5.031529443  |
| N378  | -0.682182359  | -7.034712231  | 6.027547391  |
| N379  | -0.184543661  | -4.318405858  | 5.632164781  |
| N380  | -2.564581618  | -2.517341676  | 5.773432042  |
| N381  | -4.045005237  | -3.855014492  | 7.882119818  |
| N382  | 9.510412719   | -6.228508314  | 7.568133166  |
| N383  | 8.950204486   | -3.781577167  | 6.615799806  |
| N384  | 4.367291530   | 0.108692771   | 4.891202243  |
| N385  | 2.462955786   | -0.053757616  | 6.245816691  |
| N386  | 2.541026101   | 1.484219117   | 4.502028150  |
| N387  | 9.328715589   | -0.448173294  | 7.605396013  |
| N388  | -0.635153207  | -4.752287770  | -5.297479193 |
| N389  | 3.714877625   | -4.003431156  | -3.516310922 |
| N390  | -2.831270882  | -3.386840046  | -4.817149954 |
| N391  | -5.347217738  | -4.547143824  | -4.736090635 |
| N392  | -5.801559527  | -4.971235055  | -2.039582125 |
| N393  | -5.891778907  | -2.526744388  | -0.685823021 |
| N394  | -3.471334308  | 0.445821649   | -2.592161653 |
| N395  | -1.726774191  | -0.448536030  | -1.676347067 |
| N396  | -8.338551379  | -1.257375666  | -0.380006578 |
| N397  | -12.034830160 | -0.527570325  | -3.114184643 |
| N398  | -13.804071561 | 0.119556740   | -1.942385077 |
| N399  | 3.485664245   | 6.495816665   | 7.037264555  |
| N400  | -1.058438466  | 9.427402152   | 3.054419709  |
| N401  | -2.057426109  | 9.828415286   | -0.334259968 |
| N402  | -2.932315281  | 7.768839609   | -2.002540207 |
| N403  | -4.531130596  | 4.349125245   | -5.282052200 |
| N404  | -5.231112301  | 6.405016639   | -6.158944787 |
| N405  | -6.774160075  | 4.943960453   | -5.237907430 |
| N406  | -3.727199794  | 5.601329711   | -0.320203917 |

|      |               |              |               |
|------|---------------|--------------|---------------|
| N407 | -5.682306101  | 6.882329881  | 1.251449575   |
| N408 | -8.158505210  | 7.838406692  | 0.249205838   |
| N409 | -7.183547974  | 7.186121048  | -2.655853867  |
| N410 | -10.516713228 | 6.397636687  | 0.095317702   |
| N411 | 9.294729985   | 2.469280208  | -7.144106218  |
| N412 | 5.966637660   | 2.248493217  | -5.736010118  |
| N413 | 3.182308725   | 3.450315577  | -5.798288088  |
| N414 | 3.111393561   | 6.179111652  | -4.882926766  |
| N415 | 4.372852812   | 0.082527594  | -9.659015512  |
| N416 | 1.578882184   | -0.043237843 | -9.066782928  |
| N417 | 11.975751950  | 1.996025964  | -1.558985876  |
| N418 | 8.090322943   | -0.008805381 | -1.959581028  |
| N419 | 9.031013120   | -0.420275536 | -3.915053241  |
| N420 | 12.034189752  | 1.368975357  | 1.547047256   |
| N421 | -1.985705724  | 2.494898568  | -0.444142087  |
| N422 | -0.881817016  | 2.328522496  | -0.405247554  |
| O423 | -1.219085041  | -8.290642378 | -1.755499151  |
| O424 | -4.314649475  | -8.076196355 | 0.175580531   |
| O425 | -2.496252609  | -9.784894949 | 2.991798338   |
| O426 | -0.301924048  | -6.856563722 | 3.114358998   |
| O427 | -2.835861463  | -4.393480937 | 3.308961252   |
| O428 | -4.561780390  | -6.069224660 | 5.984894654   |
| O429 | -1.448229371  | -7.504081267 | 8.141032246   |
| O430 | 1.785875883   | -4.439643805 | 6.809725315   |
| O431 | -1.056971477  | -1.327375729 | 7.014668999   |
| O432 | -4.170130994  | -1.782012186 | 8.799798186   |
| O433 | -3.692350146  | -4.135062634 | 11.441178580  |
| O434 | 10.831419847  | -3.711740604 | 5.270900330   |
| O435 | 8.363935827   | -2.121693070 | 8.850674051   |
| O436 | 9.154322678   | 2.589027201  | 9.530995532   |
| O437 | -3.007059296  | -4.057483162 | -2.632093997  |
| O438 | 2.131894139   | -4.128633260 | -5.143040958  |
| O439 | -6.338838861  | -2.527405190 | -4.343245907  |
| O440 | -5.104428510  | -0.590223473 | -5.816707403  |
| O441 | -7.890640678  | -5.830746586 | -2.475865852  |
| O442 | -5.942859045  | -3.584956785 | 1.341831833   |
| O443 | -7.453950351  | 0.201519295  | 1.139002587   |
| O444 | -11.030397513 | -0.150759480 | 1.632800544   |
| O445 | 5.559503200   | 4.248134528  | 8.796212865   |
| O446 | -2.375849977  | 4.465163110  | 5.284449285   |
| O447 | -3.321416628  | 8.813049130  | 1.265101648   |
| O448 | -4.862236591  | 8.921148253  | -2.475814132  |
| O449 | -5.102736047  | 4.941401913  | -2.030238667  |
| O450 | -6.633471068  | 4.850821578  | 1.710177981   |
| O451 | -3.323103075  | 5.457791345  | 2.717715868   |
| O452 | -8.605157368  | 8.896039412  | 2.231198440   |
| O453 | -11.638977611 | 8.142305185  | -0.859323966  |
| O454 | -9.360018963  | 6.778061543  | -3.224066392  |
| O455 | -13.840871681 | 5.470911725  | 1.095859197   |
| O456 | -7.733191392  | 2.363012489  | -3.923810817  |
| O457 | 7.191708798   | 0.692313773  | -6.904187676  |
| O458 | 3.209625788   | 2.078830552  | -7.635903321  |
| O459 | 1.657400417   | 6.689661571  | -6.558059829  |
| O460 | 3.777625116   | 9.708951930  | -5.262606884  |
| O461 | 1.601613566   | -2.075018897 | -10.102004698 |
| O462 | 5.639440996   | -3.651886286 | -5.912235553  |
| O463 | 6.542553993   | -1.618991561 | -5.776988512  |
| O464 | -1.266844403  | 2.070139779  | -9.236462455  |
| O465 | 11.280717409  | 3.489164182  | 1.280085966   |
| O466 | 13.627396297  | 3.586366942  | 3.873812627   |
| O467 | 4.471096181   | -4.578817088 | -0.580124086  |
| O468 | 5.839493987   | -5.972092216 | 0.480769927   |
| O469 | 11.682850828  | -3.833675263 | -0.547649148  |
| O470 | 10.276811649  | -5.005191059 | -1.872220471  |
| O471 | 7.658273719   | -0.620113261 | 1.163931155   |
| O472 | 8.376555635   | -2.396331247 | 2.349326948   |
| O473 | 6.542224095   | -2.072643134 | -0.718768310  |
| O474 | 9.982610542   | 0.554796048  | 5.019463570   |
| O475 | 7.702111541   | 1.067536542  | 3.416622853   |
| O476 | -5.218591699  | 1.725324916  | -4.356295627  |
| O477 | 12.919950136  | -1.950248870 | 1.601010737   |
| O478 | 10.735606968  | -1.625332443 | 3.436162294   |
| S479 | -0.402377930  | 6.726649048  | -0.010010779  |

|                          |                                             |
|--------------------------|---------------------------------------------|
|                          | S480 1.137036522 3.922781323 -2.036618647   |
|                          | S481 4.768952064 0.103084989 -2.398236835   |
|                          | S482 1.015079301 3.473547140 1.592543867    |
|                          | S483 1.296489243 0.057849924 -0.501159136   |
|                          | S484 4.844140768 3.884906937 -2.985588989   |
|                          | S485 4.548459760 -0.333751411 1.287089167   |
|                          | S486 3.368626167 5.777363864 0.061116229    |
|                          | S487 6.759546477 2.262829076 -0.126448811   |
|                          | S488 4.705483241 3.171604856 2.784491394    |
| C 47(3/2)<br>dissociated | bm22b6x2n2x47dte.car_5                      |
| Fe( 139) 0.546 2.291     | C1 -1.603454893 -8.898890852 -2.735750747   |
| Fe( 140) 0.470 -0.931    | C2 -0.643285750 -9.568172264 -3.724731939   |
| Fe( 141) 0.567 2.803     | C3 -3.947590523 -8.440077569 -2.165288382   |
| Fe( 142) 0.527 -2.363    | C4 -3.964597541 -8.867022049 -0.699255000   |
| Fe( 143) 0.543 2.791     | C5 -3.502007633 -10.614365154 0.945207346   |
| Fe( 144) 0.526 -2.423    | C6 -2.385418878 -9.951304195 1.758695917    |
| Fe( 145) 0.304 0.540     | C7 -0.201923540 -8.842061463 1.696530752    |
|                          | C8 -0.589717225 -7.398333683 2.030404547    |
|                          | C9 -1.785362671 -5.385254005 1.352986370    |
|                          | C10 -2.812059293 -5.332038482 2.493923035   |
|                          | C11 -4.729254753 -6.352035013 3.581216586   |
|                          | C12 -4.177164492 -6.687839617 4.971841256   |
|                          | C13 -2.812514998 -8.217238666 6.310017143   |
|                          | C14 -1.586945651 -7.516311376 6.909176003   |
|                          | C15 0.587886119 -6.459180660 6.452788552    |
|                          | C16 0.777376124 -4.945872380 6.304551307    |
|                          | C17 -0.144956476 -2.849715523 5.357420204   |
|                          | C18 -1.287320011 -2.127601555 6.093201325   |
|                          | C19 -0.090775779 -2.528175396 3.840326219   |
|                          | C20 -0.232223390 -1.026298938 3.569620711   |
|                          | C21 1.195933008 -3.084820149 3.221643061    |
|                          | C22 -3.724881175 -1.885505215 6.383468848   |
|                          | C23 -3.978668903 -2.496283401 7.774812547   |
|                          | C24 -4.962708713 -1.961205933 5.458009612   |
|                          | C25 -6.220408248 -1.455030513 6.173817533   |
|                          | C26 -4.721370950 -1.164867033 4.169618870   |
|                          | C27 -4.315658171 -4.488325629 9.118600165   |
|                          | C28 -3.392466326 -4.035891974 10.230633619  |
|                          | C29 10.359474593 -5.727113795 6.473487143   |
|                          | C30 10.064852155 -4.281479919 6.069906917   |
|                          | C31 8.448912094 -2.407611132 6.449204994    |
|                          | C32 8.689344652 -1.634386473 7.760766769    |
|                          | C33 6.959998015 -2.448591929 6.065821099    |
|                          | C34 6.330978952 -1.072368243 5.830163872    |
|                          | C35 4.952798281 -1.219642035 5.181312082    |
|                          | C36 3.103924419 0.468691194 5.233252265     |
|                          | C37 9.666543586 0.373283446 8.765697403     |
|                          | C38 8.813385002 1.621046887 8.884781787     |
|                          | C39 -0.970237672 -4.633806618 -3.856175736  |
|                          | C40 -2.354339124 -3.989279922 -3.682993385  |
|                          | C41 0.051403831 -3.796652246 -3.055051467   |
|                          | C42 1.431210047 -4.448895432 -2.836891450   |
|                          | C43 2.462732499 -4.178635608 -3.930794934   |
|                          | C44 -3.970224014 -2.493932242 -4.763312067  |
|                          | C45 -5.314613456 -3.209306907 -4.617535880  |
|                          | C46 -4.010608539 -1.534965007 -5.971366664  |
|                          | C47 -6.504384122 -5.326290828 -4.370041717  |
|                          | C48 -6.791387141 -5.408536291 -2.863686282  |
|                          | C49 -5.953017985 -5.004277668 -0.585180300  |
|                          | C50 -5.911318319 -3.650437506 0.119846380   |
|                          | C51 -5.885692462 -1.196767589 -0.106301654  |
|                          | C52 -7.284463027 -0.685727989 0.309998653   |
|                          | C53 -5.346423753 -0.159364028 -1.101255022  |
|                          | C54 -3.900719206 -0.263670102 -1.460926822  |
|                          | C55 -2.801688654 -0.801046773 -0.836517736  |
|                          | C56 -2.089750976 0.228579243 -2.671073966   |
|                          | C57 -9.664126274 -0.673799095 -0.322715386  |
|                          | C58 -10.223231309 -0.822950784 1.087647490  |
|                          | C59 -10.544565635 -1.470745240 -1.323620376 |
|                          | C60 -11.824768636 -0.812991540 -1.741526126 |
|                          | C61 -12.929722692 -0.452807738 -0.994539045 |
|                          | C62 -13.244170534 0.050421409 -3.129028203  |



|      |               |              |              |
|------|---------------|--------------|--------------|
| C63  | 3.656215028   | 5.158210364  | 7.609228493  |
| C64  | 5.130711768   | 4.907053726  | 7.868510573  |
| C65  | 3.183827237   | 4.069371491  | 6.609986700  |
| C66  | 1.713231589   | 4.169832308  | 6.278834719  |
| C67  | 0.740326785   | 3.554313118  | 7.088657516  |
| C68  | 1.274782216   | 4.876203454  | 5.143684228  |
| C69  | -0.621898226  | 3.633351562  | 6.777395957  |
| C70  | -0.080418260  | 4.971191116  | 4.825419873  |
| C71  | -1.028339382  | 4.351446847  | 5.646209192  |
| C72  | -0.885905846  | 8.890335299  | 1.640777355  |
| C73  | -2.174566452  | 9.145178337  | 0.846112176  |
| C74  | -0.552419187  | 7.390207725  | 1.665855473  |
| C75  | -3.159777180  | 10.066961380 | -1.204366370 |
| C76  | -3.734496159  | 8.851043756  | -1.934655115 |
| C77  | -3.379740281  | 6.496773743  | -2.590977088 |
| C78  | -4.163440109  | 5.617707507  | -1.588907151 |
| C79  | -2.159442363  | 5.782613372  | -3.206918751 |
| C80  | -2.402947566  | 4.472376092  | -3.962904882 |
| C81  | -3.089154530  | 4.566994782  | -5.338171784 |
| C82  | -5.499349367  | 5.207862446  | -5.559402065 |
| C83  | -4.485429434  | 4.860772671  | 0.714947619  |
| C84  | -5.731621723  | 5.579357971  | 1.270377188  |
| C85  | -3.620939766  | 4.434214379  | 1.910669577  |
| C86  | -6.600851852  | 7.692996488  | 2.138195410  |
| C87  | -7.893856807  | 8.232588579  | 1.529739835  |
| C88  | -9.287177217  | 8.447399371  | -0.490553960 |
| C89  | -10.590672781 | 7.620962916  | -0.456166968 |
| C90  | -8.892692233  | 8.771960223  | -1.950704139 |
| C91  | -8.503518073  | 7.513527934  | -2.717965341 |
| C92  | -11.622691372 | 5.449015850  | 0.063318540  |
| C93  | -12.674067487 | 5.842035454  | 1.097436646  |
| C94  | -11.130595682 | 4.000338784  | 0.332306416  |
| C95  | -10.214464166 | 3.493593879  | -0.758038841 |
| C96  | -10.748941537 | 2.928040097  | -1.925914250 |
| C97  | -8.819160309  | 3.611414614  | -0.658839933 |
| C98  | -9.926600608  | 2.517036966  | -2.977103254 |
| C99  | -7.978981573  | 3.225509163  | -1.708698069 |
| C100 | -8.546036902  | 2.686770218  | -2.861121480 |
| C101 | 8.372324524   | 2.614779475  | -6.062339372 |
| C102 | 7.125380130   | 1.775206004  | -6.289866014 |
| C103 | 4.705113655   | 1.563507143  | -5.776102349 |
| C104 | 3.631180307   | 2.394740285  | -6.486349302 |
| C105 | 2.210737492   | 4.385369979  | -6.312630350 |
| C106 | 2.349929871   | 5.855688794  | -5.924817978 |
| C107 | 3.173593143   | 7.575532640  | -4.426370883 |
| C108 | 3.821627292   | 8.513211524  | -5.424159301 |
| C109 | 3.732630860   | -1.191235510 | -9.360149688 |
| C110 | 2.210491966   | -1.133731869 | -9.544500911 |
| C111 | 4.061737515   | -1.817433390 | -7.984880825 |
| C112 | 5.539900446   | -2.246105751 | -7.903874106 |
| C113 | 5.920919436   | -2.588120396 | -6.481127655 |
| C114 | 0.135215130   | 0.110615314  | -9.161869570 |
| C115 | -0.215307646  | 1.537994607  | -9.536263685 |
| C116 | -0.650180126  | -0.452265674 | -7.949641920 |
| C117 | -0.057771947  | -0.056615159 | -6.618892012 |
| C118 | -0.327836020  | 1.194674002  | -6.036713725 |
| C119 | 0.853199833   | -0.912466595 | -5.974208275 |
| C120 | 0.320770472   | 1.584568597  | -4.859189249 |
| C121 | 1.504083568   | -0.520522206 | -4.799042873 |
| C122 | 1.246957826   | 0.735029499  | -4.240756667 |
| C123 | 10.876993294  | 1.947124380  | -0.544640970 |
| C124 | 11.382912253  | 2.323102163  | 0.855514010  |
| C125 | 10.097589337  | 0.619268838  | -0.537529670 |
| C126 | 9.422491159   | 0.251731692  | -1.823566864 |
| C127 | 10.023604941  | 0.005167329  | -3.042971745 |
| C128 | 7.858830639   | -0.440371143 | -3.180757844 |
| C129 | 12.551452786  | 1.689803225  | 2.893818767  |
| C130 | 13.427106471  | 2.923037354  | 2.881088629  |
| C131 | 5.298826524   | -4.716618937 | 0.254588805  |
| C132 | 5.922498351   | -3.635048941 | 1.089649055  |
| C133 | 7.045370684   | -2.827309705 | 0.321867687  |
| C134 | 8.136967801   | -3.810369544 | -0.187701426 |
| C135 | 9.350190210   | -3.077830652 | -0.785188567 |

|       |              |               |               |
|-------|--------------|---------------|---------------|
| C136  | 10.535018159 | -3.963753906  | -1.047184342  |
| C137  | 7.716350510  | -1.907113316  | 1.391835209   |
| C138  | 3.529240413  | 2.500868889   | -0.284523092  |
| Fe139 | 5.015807064  | 2.186390338   | -1.538738605  |
| Fe140 | 1.668799365  | 2.392221762   | -0.383727153  |
| Fe141 | 3.132751216  | 3.758251459   | 1.226254945   |
| Fe142 | 3.254016542  | 4.096523224   | -1.393583037  |
| Fe143 | 1.106646602  | 4.940842508   | -0.130611475  |
| Fe144 | 4.869226356  | 1.839614421   | 1.050616492   |
| Fe145 | 3.475294462  | 0.348724373   | -0.590205385  |
| H146  | 1.077082955  | -9.114318487  | -2.728329884  |
| H147  | 0.784852963  | -8.130527690  | -3.998435676  |
| H148  | -3.213989687 | -9.547887375  | -3.841793875  |
| H149  | -1.041082090 | -9.463033742  | -4.745712150  |
| H150  | -0.664710894 | -10.649262184 | -3.500018109  |
| H151  | -3.797282312 | -7.350879497  | -2.162825784  |
| H152  | -3.323617252 | -10.752385759 | -1.195897487  |
| H153  | -4.932294438 | -8.653071551  | -2.603542390  |
| H154  | -3.327078752 | -11.698360844 | 0.927392934   |
| H155  | -1.298075003 | -9.627004463  | 0.046070712   |
| H156  | -4.444066601 | -10.428590093 | 1.476766741   |
| H157  | -0.959144382 | -4.723006884  | 1.641598993   |
| H158  | -1.453920808 | -7.154997414  | 0.167104717   |
| H159  | 0.665733154  | -8.841808631  | 1.022382033   |
| H160  | -5.217453332 | -5.371090357  | 3.648946782   |
| H161  | -3.764293875 | -7.026566352  | 1.780107354   |
| H162  | 0.092708540  | -9.321242206  | 2.638387728   |
| H163  | -2.240242869 | -4.995832890  | 0.430823502   |
| H164  | -3.076926743 | -8.256207126  | 4.189294966   |
| H165  | -5.487026246 | -7.101476706  | 3.315222573   |
| H166  | 1.276566939  | -4.170510572  | 3.373403795   |
| H167  | 1.218503177  | -2.888846138  | 2.138876396   |
| H168  | 2.085035321  | -2.608687160  | 3.663368994   |
| H169  | -0.950406701 | -3.036132447  | 3.374209885   |
| H170  | -2.555027854 | -9.279098836  | 6.184824613   |
| H171  | -3.856467283 | -1.539138666  | 3.604891207   |
| H172  | -3.994206739 | -4.440522923  | 7.015790385   |
| H173  | -6.469777549 | -2.057504371  | 7.059567073   |
| H174  | -0.278819012 | -0.849042503  | 2.484380646   |
| H175  | 0.626648289  | -0.455899213  | 3.951610846   |
| H176  | 3.118335804  | 5.000818535   | 8.563966953   |
| H177  | -5.601947382 | -1.231841315  | 3.513976334   |
| H178  | -7.081305610 | -1.490871741  | 5.489358544   |
| H179  | -4.549633108 | -0.101852066  | 4.404969161   |
| H180  | -6.089855378 | -0.410108832  | 6.499568936   |
| H181  | -5.120909587 | -3.021819156  | 5.190244588   |
| H182  | -3.490569173 | -0.829352959  | 6.582085048   |
| H183  | -2.702818567 | -3.153345436  | 4.980250786   |
| H184  | -1.147340336 | -0.601983704  | 4.010994188   |
| H185  | -2.663340897 | 4.030671023   | 1.546510672   |
| H186  | -4.171116096 | 3.627495621   | 2.423593485   |
| H187  | -3.017722688 | 5.179285608   | 3.612758790   |
| H188  | -2.913245695 | 3.978719308   | 5.917501696   |
| H189  | -0.402565994 | 5.503994099   | 3.930757378   |
| H190  | 2.010339923  | 5.333787946   | 4.477924246   |
| H191  | 1.048190969  | 2.990631570   | 7.973746969   |
| H192  | -0.945841374 | -4.836032980  | 5.210272077   |
| H193  | 1.403478610  | -6.938872744  | 5.889971954   |
| H194  | 0.725256440  | -6.700328618  | 7.515433984   |
| H195  | -0.801515104 | -7.181805811  | 5.017729850   |
| H196  | -3.610962993 | -8.141885797  | 7.058834377   |
| H197  | -1.363750811 | 3.134326952   | 7.407994902   |
| H198  | 0.777384106  | -2.490781796  | 5.834193171   |
| H199  | -5.359915787 | -4.324537628  | 9.432591072   |
| H200  | -4.166443763 | -5.571967265  | 8.994550525   |
| H201  | -2.385450724 | -3.689462493  | 9.899186220   |
| H202  | 10.728834751 | 0.661776828   | 8.753033829   |
| H203  | 4.464414202  | -3.874284155  | -4.221729848  |
| H204  | 6.510167684  | -5.962139171  | 1.090496817   |
| H205  | 5.694993101  | -3.137890321  | -8.527536489  |
| H206  | 6.185335487  | -1.439583700  | -8.280412187  |
| H207  | 3.422780625  | -2.694302891  | -7.801823379  |
| H208  | 0.543480636  | 2.034998193   | -10.184395948 |

|      |               |              |               |
|------|---------------|--------------|---------------|
| H209 | 4.061240667   | -1.900024458 | -10.134963651 |
| H210 | 0.172603399   | -2.822319450 | -3.554817429  |
| H211 | 1.326243331   | -5.545031533 | -2.757864869  |
| H212 | 2.110597208   | 0.688214920  | -8.556732587  |
| H213 | -0.158057034  | -0.489009186 | -10.046475593 |
| H214 | 4.234183455   | 0.769501819  | -8.892404467  |
| H215 | 3.994266112   | -4.046032255 | -2.529882376  |
| H216 | 3.824411431   | -1.086243700 | -7.197163348  |
| H217 | 5.374103035   | -0.030247937 | -9.767982118  |
| H218 | -0.830241335  | -5.655252274 | -5.647879893  |
| H219 | -0.392515528  | -3.604421824 | -2.067247358  |
| H220 | 6.706613450   | -0.789768817 | -6.322414433  |
| H221 | 1.836812613   | -4.117946313 | -1.870732650  |
| H222 | 3.262884556   | -1.099666048 | -0.948422082  |
| H223 | -5.280789816  | -1.213753202 | 0.810735598   |
| H224 | -2.710000552  | -1.366012449 | 0.083141827   |
| H225 | -6.929372898  | -5.458861385 | -0.363643064  |
| H226 | -4.885220337  | -4.702749513 | -2.407449260  |
| H227 | -8.135634283  | -2.011473252 | -1.000790473  |
| H228 | -13.153359255 | -0.518480011 | 0.064445040   |
| H229 | -9.902330565  | -1.763656896 | 1.599753697   |
| H230 | -10.727777392 | -2.477321522 | -0.910257021  |
| H231 | -9.653855785  | 0.393974874  | -0.590162254  |
| H232 | -13.744010582 | 0.416409597  | -4.022475881  |
| H233 | -5.522126045  | 0.832574062  | -0.652709101  |
| H234 | -5.955040693  | -0.194326505 | -2.019625563  |
| H235 | -14.737418757 | 0.470664207  | -1.670261528  |
| H236 | -9.950732134  | -1.609225640 | -2.239897652  |
| H237 | -5.861990961  | -2.658463535 | -1.690364473  |
| H238 | -5.188378769  | -5.644621744 | -0.122388157  |
| H239 | -7.397462673  | -4.890973195 | -4.837263255  |
| H240 | -1.430954426  | 0.637615612  | -3.433952326  |
| H241 | -6.386167582  | -6.346512098 | -4.756097787  |
| H242 | 3.590269616   | 7.200912358  | 7.770770748   |
| H243 | 2.543104933   | 6.598314990  | 6.669348206   |
| H244 | -2.819856725  | 6.014924899  | -0.060799805  |
| H245 | -4.861558671  | 3.946490717  | 0.233689391   |
| H246 | -4.812465254  | 7.398015364  | 1.048110962   |
| H247 | -4.028699456  | 0.916157008  | -3.263684985  |
| H248 | -5.167487614  | 0.942402108  | -5.023114085  |
| H249 | -6.109994887  | 1.773269286  | -4.046587928  |
| H250 | -3.079046615  | -0.953654498 | -6.001760292  |
| H251 | -4.098465499  | -2.110530937 | -6.907736136  |
| H252 | -8.069531835  | 9.500826613  | -1.931824713  |
| H253 | -9.763619470  | 9.228101130  | -2.437093050  |
| H254 | -6.442399082  | 7.867986986  | -2.451072900  |
| H255 | -6.888680454  | 6.296998679  | -3.050803783  |
| H256 | -5.981646403  | 7.059614048  | -6.293881399  |
| H257 | -2.664880462  | 3.812059691  | -6.015732461  |
| H258 | -10.360279418 | 2.058365164  | -3.869318125  |
| H259 | -8.357744459  | 4.008369744  | 0.249767051   |
| H260 | -7.018792436  | 4.061214308  | -4.749809827  |
| H261 | -1.437154005  | 5.570552392  | -2.403033772  |
| H262 | -2.057588479  | 7.743830647  | -1.472797635  |
| H263 | -2.946378705  | 3.755592194  | -3.331065195  |
| H264 | -4.454616189  | -5.020606862 | -4.947580563  |
| H265 | -2.860944528  | 10.806311095 | -1.959197178  |
| H266 | -2.165054765  | -3.447565827 | -5.599693812  |
| H267 | -1.670332262  | 6.505389921  | -3.881316812  |
| H268 | -6.901085823  | 3.384260830  | -1.640150341  |
| H269 | -5.844299696  | -1.110729122 | -5.440161766  |
| H270 | -3.984656968  | 10.493701219 | -0.617449101  |
| H271 | -4.364382500  | 6.551756065  | -6.629425280  |
| H272 | -7.534181721  | 5.455718225  | -5.646836289  |
| H273 | 0.392764390   | -4.549051052 | -5.394602746  |
| H274 | -1.046168012  | -5.622262828 | -3.365084426  |
| H275 | -11.829154966 | 2.796583392  | -2.017347472  |
| H276 | -3.904093191  | -1.880384237 | -3.850972423  |
| H277 | -4.107355615  | 6.743927598  | -3.376154487  |
| H278 | -2.887063954  | 5.542828496  | -5.797576759  |
| H279 | -1.408156130  | 4.032621141  | -4.125431696  |
| H280 | -4.822539396  | 3.391251388  | -4.948117643  |
| H281 | -6.897377160  | 7.068860022  | 2.995600757   |

|      |              |              |              |
|------|--------------|--------------|--------------|
| H282 | -7.450177329 | 7.356683166  | -0.272272687 |
| H283 | -9.538592098 | 9.393130552  | 0.011267841  |
| H284 | -6.053018156 | 8.559543472  | 2.530582096  |
| H285 | -9.598920174 | 6.072917275  | 0.429379126  |
| H286 | 8.095662228  | 3.673094093  | -5.943329645 |
| H287 | 8.783427247  | 2.280752724  | -5.086974264 |
| H288 | 10.190004409 | 2.756589825  | -0.831378267 |
| H289 | 10.213730650 | 2.835139673  | -6.909313118 |
| H290 | 9.434539179  | 1.467548725  | -7.364655820 |
| H291 | 0.414963869  | 7.261215276  | 2.167871932  |
| H292 | -1.847978521 | 8.969991928  | 3.436363574  |
| H293 | -1.092266246 | 10.044962993 | -0.654498798 |
| H294 | -1.338470218 | 6.869759102  | 2.231900583  |
| H295 | -1.133431703 | 10.384050362 | 3.029087600  |
| H296 | 3.766613580  | 7.611203987  | -3.499244052 |
| H297 | -0.054910654 | 9.427634527  | 1.157856670  |
| H298 | 6.409499245  | -2.986148967 | 6.856095369  |
| H299 | 9.022792800  | -1.949246448 | 5.634953122  |
| H300 | 3.622758510  | 5.491035782  | -4.304181118 |
| H301 | 1.755731203  | 1.972238277  | 4.990911847  |
| H302 | 2.250614938  | 4.330872674  | -7.408242272 |
| H303 | 2.230918346  | -1.184337044 | -4.325220528 |
| H304 | 1.188173668  | 4.087088653  | -6.020960790 |
| H305 | 4.274561779  | -1.798656851 | 5.821762584  |
| H306 | 3.517887972  | 3.535198086  | -4.795718568 |
| H307 | 5.047946246  | -1.781776846 | 4.237979473  |
| H308 | 6.890201802  | -3.050966655 | 5.145792693  |
| H309 | 6.962535934  | -0.469271064 | 5.160118723  |
| H310 | 6.235250585  | -0.518523199 | 6.778497725  |
| H311 | -0.656798358 | -1.548370471 | -8.040677364 |
| H312 | 8.488792103  | -4.391976635 | 7.292354731  |
| H313 | 10.166792778 | -6.338963209 | 5.579617883  |
| H314 | 1.762046258  | 1.056687963  | -3.331810046 |
| H315 | 10.003158434 | -6.064987373 | 8.473972869  |
| H316 | 9.370888549  | -7.216361153 | 7.494681398  |
| H317 | 4.733653798  | 0.583424722  | 4.066178854  |
| H318 | 0.130995194  | 2.562210416  | -4.410876914 |
| H319 | 1.062834819  | -1.897453723 | -6.397878828 |
| H320 | 12.193569099 | -1.898334068 | 2.251301799  |
| H321 | 10.796848471 | -0.196308419 | -0.274506392 |
| H322 | 9.864587116  | -1.822080038 | 2.985382821  |
| H323 | 12.565939744 | -2.519165952 | 0.888883356  |
| H324 | 4.474659261  | 8.017638132  | -6.181454650 |
| H325 | 7.711373437  | 0.451872955  | 2.633375824  |
| H326 | 6.353162393  | -4.044018178 | 2.016732251  |
| H327 | 6.039968432  | 3.077440365  | -5.139909813 |
| H328 | 8.468333409  | -4.430431280 | 0.660548090  |
| H329 | 9.126236520  | -0.721881588 | -4.848773865 |
| H330 | 6.912507201  | -0.760110683 | -3.598397929 |
| H331 | 11.445447209 | -5.780125940 | 6.660478567  |
| H332 | 3.012229553  | 1.922796558  | 3.790887759  |
| H333 | 9.204672098  | 0.848734044  | 4.509759063  |
| H334 | 7.234768834  | 1.848705045  | 3.120520018  |
| H335 | 9.587570006  | -0.107739356 | 6.665597085  |
| H336 | 3.007456956  | -0.616385205 | 6.982006142  |
| H337 | 11.070951361 | -5.524969014 | -1.971166824 |
| H338 | 9.048653785  | -2.603306035 | -1.731712483 |
| H339 | 9.696032788  | -2.287767485 | -0.110095119 |
| H340 | 7.695024861  | -4.468280588 | -0.950046724 |
| H341 | 4.402672606  | 1.334045152  | -4.741724558 |
| H342 | -1.033826418 | 1.870367461  | -6.526765726 |
| H343 | -1.687120263 | -0.095827500 | -8.049227726 |
| H344 | 5.142831849  | -2.902770838 | 1.341457750  |
| H345 | 10.353595408 | -0.195419470 | 4.453113031  |
| H346 | 10.797647701 | -2.364971182 | 4.106300585  |
| H347 | 1.536221721  | 0.167753209  | 6.535141489  |
| H348 | 11.055037118 | 0.097693863  | -3.362465149 |
| H349 | 9.343202375  | 0.649439582  | 0.259477844  |
| H350 | 4.835114385  | 0.630176717  | -6.327566465 |
| H351 | 2.164307912  | 7.948702692  | -4.192849423 |
| H352 | 3.399492663  | 3.091748436  | 7.067352654  |
| H353 | 3.779890518  | 4.145073096  | 5.686600939  |
| H354 | 12.414590754 | 2.862727035  | -1.548989311 |

|       |               |               |              |
|-------|---------------|---------------|--------------|
| H355  | 12.708936658  | 1.284213750   | -1.223897056 |
| H356  | 13.179944257  | 0.847048154   | 3.221845756  |
| H357  | 12.125531190  | 0.403387672   | 1.246579171  |
| H358  | 13.929573066  | 3.129970724   | 1.906068296  |
| H359  | 11.743717024  | 1.811606331   | 3.634084321  |
| H360  | 5.810332056   | 5.357955502   | 7.105545908  |
| H361  | -12.309360034 | 6.501720078   | 1.921041088  |
| H362  | 9.486959125   | -0.230489159  | 9.672394438  |
| H363  | 7.820576375   | 1.572748300   | 8.374372873  |
| H364  | -12.112766253 | 5.482810911   | -0.922749246 |
| H365  | -10.623334017 | 3.969251145   | 1.309966458  |
| H366  | -12.023286514 | 3.361956455   | 0.407290583  |
| H367  | -8.222230646  | 1.927949942   | -4.626614437 |
| H368  | 0.994904339   | -0.099809168  | 0.884268323  |
| H369  | -0.695322609  | -0.566260586  | -1.310251325 |
| Mo370 | 6.144807964   | -0.034541339  | -0.439721158 |
| N371  | 0.733975680   | -9.105156017  | -3.692344263 |
| N372  | -2.931028055  | -9.096320955  | -2.975362105 |
| N373  | -3.585837450  | -10.139405946 | -0.427355920 |
| N374  | -1.274071570  | -9.596698982  | 1.064853833  |
| N375  | -1.293987388  | -6.729286467  | 1.081538811  |
| N376  | -3.717415901  | -6.337804551  | 2.535299001  |
| N377  | -3.292317879  | -7.716221235  | 5.031683430  |
| N378  | -0.687843874  | -7.004201067  | 6.019737077  |
| N379  | -0.187886931  | -4.286258705  | 5.611535668  |
| N380  | -2.554668654  | -2.485684394  | 5.740536147  |
| N381  | -4.007580562  | -3.851616660  | 7.851480775  |
| N382  | 9.527662961   | -6.211446666  | 7.581377664  |
| N383  | 8.948749864   | -3.767704321  | 6.620327774  |
| N384  | 4.327780289   | 0.069388396   | 4.856199786  |
| N385  | 2.478076246   | -0.112159219  | 6.279846934  |
| N386  | 2.467666908   | 1.413504910   | 4.522169165  |
| N387  | 9.330330720   | -0.447595027  | 7.617828490  |
| N388  | -0.622344813  | -4.724990831  | -5.278905684 |
| N389  | 3.736388579   | -4.031664030  | -3.518498114 |
| N390  | -2.818876677  | -3.371049786  | -4.802713028 |
| N391  | -5.329381991  | -4.551379315  | -4.723872120 |
| N392  | -5.800838400  | -4.975815505  | -2.029525937 |
| N393  | -5.898358515  | -2.536688984  | -0.679438702 |
| N394  | -3.424469065  | 0.363881233   | -2.603771802 |
| N395  | -1.700199161  | -0.487153444  | -1.610572341 |
| N396  | -8.317615304  | -1.225717091  | -0.381872071 |
| N397  | -12.035630075 | -0.494976666  | -3.074053461 |
| N398  | -13.818670323 | 0.096659499   | -1.893411329 |
| N399  | 3.493785534   | 6.496209179   | 7.035447622  |
| N400  | -0.996393656  | 9.368947685   | 3.027711318  |
| N401  | -2.026603524  | 9.795322391   | -0.342627709 |
| N402  | -2.939468510  | 7.760684426   | -2.007793598 |
| N403  | -4.537385778  | 4.325879926   | -5.288445067 |
| N404  | -5.226662587  | 6.404461697   | -6.117245342 |
| N405  | -6.774748322  | 4.938812721   | -5.213291886 |
| N406  | -3.755751420  | 5.633172917   | -0.290086206 |
| N407  | -5.703467583  | 6.941620974   | 1.270614470  |
| N408  | -8.173455654  | 7.859689068   | 0.245375948  |
| N409  | -7.184226623  | 7.184283334   | -2.644679643 |
| N410  | -10.501564066 | 6.375239681   | 0.071433869  |
| N411  | 9.301060564   | 2.467569805   | -7.187705741 |
| N412  | 5.988933593   | 2.255383499   | -5.749037026 |
| N413  | 3.188543202   | 3.455074656   | -5.779033908 |
| N414  | 3.147196640   | 6.195949276   | -4.883049729 |
| N415  | 4.366142162   | 0.098838073   | -9.659770662 |
| N416  | 1.579282193   | -0.024075029  | -9.068656136 |
| N417  | 11.978619010  | 1.936166034   | -1.527397149 |
| N418  | 8.060752932   | -0.025946669  | -1.932883900 |
| N419  | 9.020394659   | -0.430984805  | -3.880987007 |
| N420  | 12.044594077  | 1.368585523   | 1.567858651  |
| N421  | -2.277010905  | 2.747019301   | -0.910350876 |
| N422  | -1.999775401  | 2.225182499   | 0.032819860  |
| O423  | -1.207451115  | -8.261728470  | -1.742518273 |
| O424  | -4.315847792  | -8.068818606  | 0.185644973  |
| O425  | -2.500489234  | -9.790383672  | 2.984152487  |
| O426  | -0.289389591  | -6.880308329  | 3.117549215  |
| O427  | -2.807097422  | -4.408561789  | 3.324495095  |

|      |               |              |               |
|------|---------------|--------------|---------------|
| O428 | -4.559161395  | -6.068145928 | 5.978904614   |
| O429 | -1.437148691  | -7.480230069 | 8.137699895   |
| O430 | 1.786063482   | -4.406938152 | 6.783871111   |
| O431 | -1.044539670  | -1.265039486 | 6.951816893   |
| O432 | -4.150778447  | -1.784332150 | 8.778158412   |
| O433 | -3.689331851  | -4.104510678 | 11.414054906  |
| O434 | 10.828771454  | -3.697300178 | 5.272206046   |
| O435 | 8.324497522   | -2.105281627 | 8.852234361   |
| O436 | 9.160997029   | 2.612051411  | 9.505981995   |
| O437 | -2.990366277  | -4.020053066 | -2.610231996  |
| O438 | 2.145653295   | -4.114404217 | -5.139891920  |
| O439 | -6.338329749  | -2.532771598 | -4.371120746  |
| O440 | -5.101470618  | -0.606385327 | -5.858545365  |
| O441 | -7.879239248  | -5.853550567 | -2.480527830  |
| O442 | -5.919341457  | -3.588849499 | 1.351742858   |
| O443 | -7.415090449  | 0.226576676  | 1.131058900   |
| O444 | -10.990527911 | -0.035034253 | 1.613343642   |
| O445 | 5.565060643   | 4.255075974  | 8.807423400   |
| O446 | -2.355873338  | 4.467938543  | 5.284665519   |
| O447 | -3.294218525  | 8.796136635  | 1.263349307   |
| O448 | -4.869114921  | 8.927503714  | -2.448164643  |
| O449 | -5.137844578  | 4.957018548  | -1.989902788  |
| O450 | -6.675479565  | 4.920919227  | 1.730900492   |
| O451 | -3.404215956  | 5.541639759  | 2.788009561   |
| O452 | -8.639796962  | 8.954680092  | 2.202563210   |
| O453 | -11.645932419 | 8.101436648  | -0.890800202  |
| O454 | -9.347968396  | 6.791861062  | -3.271752030  |
| O455 | -13.827620618 | 5.446930723  | 1.051777089   |
| O456 | -7.686369164  | 2.345314154  | -3.924049004  |
| O457 | 7.196321070   | 0.687590230  | -6.917028767  |
| O458 | 3.225468925   | 2.105433192  | -7.634025674  |
| O459 | 1.693015330   | 6.702491182  | -6.556174432  |
| O460 | 3.683299721   | 9.725631018  | -5.392432303  |
| O461 | 1.591592473   | -2.069455971 | -10.077922436 |
| O462 | 5.649687741   | -3.657372331 | -5.942218937  |
| O463 | 6.550826954   | -1.625095391 | -5.780927210  |
| O464 | -1.243211895  | 2.113584831  | -9.210282018  |
| O465 | 11.270068034  | 3.481476811  | 1.298008035   |
| O466 | 13.648895796  | 3.604805337  | 3.871593867   |
| O467 | 4.392160939   | -4.563288895 | -0.552634328  |
| O468 | 5.807837560   | -5.981255607 | 0.412441946   |
| O469 | 11.666008972  | -3.796958740 | -0.596669494  |
| O470 | 10.243827327  | -5.007824119 | -1.867386277  |
| O471 | 7.589217533   | -0.640243704 | 1.181709152   |
| O472 | 8.355982433   | -2.410546327 | 2.345829392   |
| O473 | 6.493923918   | -2.090127232 | -0.709025175  |
| O474 | 9.995036900   | 0.538428485  | 5.019287260   |
| O475 | 7.701137867   | 1.047198811  | 3.426947638   |
| O476 | -5.177909526  | 1.689445433  | -4.364919309  |
| O477 | 12.937474345  | -1.957006560 | 1.599324306   |
| O478 | 10.743465804  | -1.644211978 | 3.425646448   |
| S479 | -0.463100732  | 6.622244811  | -0.017878149  |
| S480 | 1.103146631   | 3.774183035  | -2.058928244  |
| S481 | 4.716641348   | 0.138071470  | -2.379827426  |
| S482 | 0.887461969   | 3.315811872  | 1.466513669   |
| S483 | 1.214966309   | 0.210733991  | -0.432034079  |
| S484 | 4.840370584   | 3.927165376  | -2.960599028  |
| S485 | 4.447462637   | -0.348000861 | 1.250810362   |
| S486 | 3.236517812   | 5.765452112  | 0.086654001   |
| S487 | 6.756949889   | 2.241156763  | -0.094555101  |
| S488 | 4.591965457   | 3.161059591  | 2.813639953   |

**Structure C 35(3/2)**

|                       |  |                        |                                         |
|-----------------------|--|------------------------|-----------------------------------------|
| C 35(3/2)             |  | bm22b6x2n2xd35tc.car 4 |                                         |
| associated            |  | C1                     | -1.850830777 -8.159785533 -4.499557399  |
| Fe( 139) 0.543 -2.417 |  | C2                     | -0.922254805 -8.620563710 -5.626838484  |
| Fe( 140) 0.441 -1.282 |  | C3                     | -4.171764466 -7.774362912 -3.796101537  |
| Fe( 141) 0.546 -2.581 |  | C4                     | -4.155964551 -8.480584907 -2.442152764  |
| Fe( 142) 0.578 2.858  |  | C5                     | -3.702284326 -10.531837839 -1.192979473 |
|                       |  | C6                     | -2.560193665 -10.065955846 -0.283348019 |
|                       |  | C7                     | -0.364432494 -8.987104933 -0.156261606  |
|                       |  | C8                     | -0.721059189 -7.638061742 0.475277097   |

|          |       |       |     |               |              |              |
|----------|-------|-------|-----|---------------|--------------|--------------|
| Fe( 143) | 0.557 | 2.894 | C9  | -1.892601594  | -5.511873325 | 0.240401850  |
| Fe( 144) | 0.500 | 2.176 | C10 | -2.902228514  | -5.669087136 | 1.388026550  |
| Fe( 145) | 0.358 | 1.071 | C11 | -4.803601720  | -6.876295196 | 2.295772282  |
|          |       |       | C12 | -4.227819576  | -7.502562194 | 3.573062418  |
|          |       |       | C13 | -2.883053391  | -9.306240741 | 4.535440936  |
|          |       |       | C14 | -1.622070325  | -8.781645151 | 5.234088668  |
|          |       |       | C15 | 0.567990252   | -7.697177401 | 4.965236332  |
|          |       |       | C16 | 0.778787186   | -6.189906774 | 5.131305098  |
|          |       |       | C17 | -0.132584780  | -3.930562396 | 4.679719584  |
|          |       |       | C18 | -1.248746839  | -3.376622589 | 5.585283291  |
|          |       |       | C19 | -0.100293453  | -3.285426989 | 3.267576505  |
|          |       |       | C20 | -0.225083419  | -1.759534658 | 3.337108893  |
|          |       |       | C21 | 1.167242283   | -3.700345040 | 2.512094460  |
|          |       |       | C22 | -3.670858299  | -3.118686935 | 5.952741384  |
|          |       |       | C23 | -3.931593531  | -3.993002466 | 7.196585048  |
|          |       |       | C24 | -4.922362553  | -2.976423171 | 5.052277482  |
|          |       |       | C25 | -6.156519897  | -2.593074417 | 5.876273503  |
|          |       |       | C26 | -4.678772504  | -1.947327958 | 3.941353474  |
|          |       |       | C27 | -4.307519611  | -6.206116572 | 8.116052552  |
|          |       |       | C28 | -3.310859121  | -6.047647787 | 9.247476816  |
|          |       |       | C29 | 10.349234880  | -7.116307913 | 4.931215753  |
|          |       |       | C30 | 10.083278040  | -5.611655317 | 4.839664228  |
|          |       |       | C31 | 8.507892066   | -3.829193203 | 5.618919316  |
|          |       |       | C32 | 8.789228968   | -3.351968317 | 7.057847618  |
|          |       |       | C33 | 7.008922739   | -3.761324738 | 5.278230035  |
|          |       |       | C34 | 6.413494996   | -2.352117284 | 5.354765065  |
|          |       |       | C35 | 5.007908808   | -2.331661554 | 4.752138920  |
|          |       |       | C36 | 3.212632314   | -0.634635952 | 5.155643063  |
|          |       |       | C37 | 9.812537981   | -1.603065000 | 8.437518585  |
|          |       |       | C38 | 8.979450949   | -0.406390032 | 8.848985791  |
|          |       |       | C39 | -1.143769148  | -3.753987781 | -4.750921739 |
|          |       |       | C40 | -2.513720514  | -3.139575032 | -4.418821204 |
|          |       |       | C41 | -0.109053440  | -3.102222852 | -3.804287073 |
|          |       |       | C42 | 1.275380098   | -3.778504193 | -3.721166191 |
|          |       |       | C43 | 2.293326595   | -3.306445694 | -4.758817430 |
|          |       |       | C44 | -4.099558831  | -1.395534833 | -5.090775721 |
|          |       |       | C45 | -5.457485926  | -2.100175390 | -5.056044127 |
|          |       |       | C46 | -4.154882499  | -0.197779907 | -6.061875061 |
|          |       |       | C47 | -6.701826896  | -4.190291516 | -5.245966784 |
|          |       |       | C48 | -6.959712627  | -4.567053609 | -3.779258819 |
|          |       |       | C49 | -6.055798880  | -4.663746870 | -1.492764535 |
|          |       |       | C50 | -5.996087444  | -3.481196584 | -0.528249786 |
|          |       |       | C51 | -5.938362836  | -1.042880595 | -0.227606980 |
|          |       |       | C52 | -7.331339660  | -0.632070356 | 0.311589709  |
|          |       |       | C53 | -5.402614001  | 0.190817547  | -0.968370830 |
|          |       |       | C54 | -3.965838368  | 0.168546025  | -1.383782116 |
|          |       |       | C55 | -2.855751435  | -0.524587372 | -0.965100338 |
|          |       |       | C56 | -2.197735226  | 0.915508701  | -2.524729112 |
|          |       |       | C57 | -9.726648500  | -0.484632333 | -0.253600067 |
|          |       |       | C58 | -10.262739663 | -0.957736535 | 1.092148564  |
|          |       |       | C59 | -10.627016765 | -1.017730353 | -1.400071333 |
|          |       |       | C60 | -11.885001932 | -0.243711134 | -1.656004852 |
|          |       |       | C61 | -12.966233378 | 0.007255865  | -0.832189738 |
|          |       |       | C62 | -13.281204938 | 0.930845785  | -2.821397314 |
|          |       |       | C63 | 3.883248419   | 3.411716888  | 8.423864924  |
|          |       |       | C64 | 5.359159065   | 3.093823086  | 8.576091566  |
|          |       |       | C65 | 3.362107942   | 2.558120144  | 7.237130839  |
|          |       |       | C66 | 1.887858282   | 2.751798963  | 6.973085534  |
|          |       |       | C67 | 0.917080137   | 1.989413998  | 7.651282385  |
|          |       |       | C68 | 1.438685565   | 3.703072804  | 6.040180024  |
|          |       |       | C69 | -0.449381642  | 2.160297005  | 7.402154148  |
|          |       |       | C70 | 0.079215805   | 3.894011549  | 5.790381988  |
|          |       |       | C71 | -0.866021486  | 3.119013437  | 6.469470987  |
|          |       |       | C72 | -0.702275860  | 8.434706064  | 3.495691073  |
|          |       |       | C73 | -1.991710965  | 8.845574568  | 2.774103586  |
|          |       |       | C74 | -0.365482560  | 6.969138205  | 3.182030687  |
|          |       |       | C75 | -2.980066697  | 10.163457038 | 0.956743038  |
|          |       |       | C76 | -3.583552017  | 9.121764451  | 0.013754563  |
|          |       |       | C77 | -3.271894307  | 6.961622805  | -1.136928513 |
|          |       |       | C78 | -4.049345566  | 5.895665722  | -0.334890068 |
|          |       |       | C79 | -2.075536299  | 6.372504509  | -1.908277044 |
|          |       |       | C80 | -2.363070689  | 5.245627395  | -2.905413600 |
|          |       |       | C81 | -3.082891566  | 5.633117224  | -4.211642586 |

|       |               |               |              |
|-------|---------------|---------------|--------------|
| C82   | -5.484642724  | 6.348772615   | -4.250575277 |
| C83   | -4.339954777  | 4.644648253   | 1.741816344  |
| C84   | -5.560682073  | 5.239752101   | 2.475046923  |
| C85   | -3.451883287  | 3.942560131   | 2.776916750  |
| C86   | -6.396440687  | 7.123368407   | 3.794015837  |
| C87   | -7.671681297  | 7.838157176   | 3.349440229  |
| C88   | -9.107582805  | 8.522480985   | 1.464208854  |
| C89   | -10.440741656 | 7.750477919   | 1.361075002  |
| C90   | -8.729377540  | 9.129711626   | 0.091219156  |
| C91   | -8.392367597  | 8.043453982   | -0.922975593 |
| C92   | -11.537774269 | 5.547683536   | 1.446405264  |
| C93   | -12.563712221 | 5.732922017   | 2.559961895  |
| C94   | -11.080073777 | 4.064868556   | 1.391198064  |
| C95   | -10.197422488 | 3.770561053   | 0.199115497  |
| C96   | -10.767906356 | 3.453320924   | -1.044074088 |
| C97   | -8.797629821  | 3.848996279   | 0.284881085  |
| C98   | -9.973207401  | 3.243602884   | -2.174856888 |
| C99   | -7.986481411  | 3.666463147   | -0.841023729 |
| C100  | -8.589164557  | 3.376963190   | -2.063807869 |
| C101  | 8.291374349   | 3.688649866   | -5.537885314 |
| C102  | 7.039723401   | 2.913488769   | -5.916004319 |
| C103  | 4.622661179   | 2.619994598   | -5.428593873 |
| C104  | 3.563241303   | 3.604888462   | -5.934906342 |
| C105  | 2.199082284   | 5.552303079   | -5.334651524 |
| C106  | 2.365403771   | 6.903948711   | -4.645321261 |
| C107  | 3.229174177   | 8.245563963   | -2.815460168 |
| C108  | 3.939677838   | 9.359162568   | -3.556300259 |
| C109  | 3.556002974   | 0.697511492   | -9.487207354 |
| C110  | 2.034767022   | 0.821619190   | -9.643405239 |
| C111  | 3.883008013   | -0.198522360  | -8.270256297 |
| C112  | 5.347868658   | -0.671793065  | -8.306042031 |
| C113  | 5.751111052   | -1.291194384  | -6.987111472 |
| C114  | -0.016268213  | 1.976648788   | -8.965293894 |
| C115  | -0.369144849  | 3.451496837   | -9.029306063 |
| C116  | -0.768568172  | 1.179912962   | -7.868848832 |
| C117  | -0.154847665  | 1.323022996   | -6.497429610 |
| C118  | -0.422026170  | 2.442056349   | -5.689106242 |
| C119  | 0.760175161   | 0.363369196   | -6.030455665 |
| C120  | 0.235480964   | 2.605141708   | -4.463912049 |
| C121  | 1.418698671   | 0.527434409   | -4.806155369 |
| C122  | 1.166796093   | 1.658430102   | -4.024059429 |
| C123  | 10.917254442  | 1.856437310   | -0.381636947 |
| C124  | 11.444137438  | 1.923300148   | 1.060803085  |
| C125  | 10.140605419  | 0.557171580   | -0.649013572 |
| C126  | 9.430869557   | 0.478558540   | -1.964589338 |
| C127  | 9.995864748   | 0.479110125   | -3.225418989 |
| C128  | 7.818545750   | 0.109867811   | -3.391298393 |
| C129  | 12.588512971  | 0.849204376   | 2.916026256  |
| C130  | 13.508224877  | 2.026815512   | 3.153962364  |
| C131  | 5.269379329   | -4.766630226  | -0.835099412 |
| C132  | 5.892973627   | -3.857482211  | 0.186877268  |
| C133  | 7.036696510   | -2.938710944  | -0.407143067 |
| C134  | 8.096352788   | -3.823491514  | -1.125979066 |
| C135  | 9.317231809   | -3.012297383  | -1.591021430 |
| C136  | 10.477278271  | -3.860134560  | -2.031525919 |
| C137  | 7.751368226   | -2.276098678  | 0.812403863  |
| C138  | 3.524970119   | 2.407857664   | 0.162339426  |
| Fe139 | 5.007404374   | 2.368579205   | -1.189041792 |
| Fe140 | 1.286478457   | 2.455972782   | 0.190877840  |
| Fe141 | 3.391390521   | 3.413897262   | 1.875243528  |
| Fe142 | 3.394282793   | 4.232868154   | -0.573466474 |
| Fe143 | 1.386338406   | 4.971547437   | 1.133459693  |
| Fe144 | 4.969544179   | 1.567516073   | 1.237414507  |
| Fe145 | 3.561968549   | 0.285341784   | -0.481543785 |
| H146  | 0.819418304   | -8.408904360  | -4.587555962 |
| H147  | 0.527840529   | -7.178756686  | -5.619762978 |
| H148  | -3.494075543  | -8.513615542  | -5.684715214 |
| H149  | -1.336764224  | -8.295805004  | -6.593697038 |
| H150  | -0.961730721  | -9.723734773  | -5.633008759 |
| H151  | -4.017140458  | -6.706766754  | -3.584545172 |
| H152  | -3.570269355  | -10.241069758 | -3.320009229 |
| H153  | -5.168817751  | -7.900003000  | -4.239844887 |
| H154  | -3.550689096  | -11.592260262 | -1.434892621 |



|      |               |               |               |
|------|---------------|---------------|---------------|
| H155 | -1.500607692  | -9.397733605  | -1.911100800  |
| H156 | -4.628769458  | -10.439633698 | -0.612509471  |
| H157 | -1.049522574  | -4.927606806  | 0.632251925   |
| H158 | -1.630976523  | -7.020175591  | -1.273648409  |
| H159 | 0.488791215   | -8.852669339  | -0.835253055  |
| H160 | -5.266809028  | -5.923293269  | 2.582908880   |
| H161 | -3.876183526  | -7.194378934  | 0.381457095   |
| H162 | -0.058586675  | -9.652521434  | 0.659745226   |
| H163 | -2.356421692  | -4.938865159  | -0.575242393  |
| H164 | -3.186229084  | -8.902350904  | 2.458704731   |
| H165 | -5.584073299  | -7.539681869  | 1.898234927   |
| H166 | 1.252650209   | -4.793844988  | 2.432380324   |
| H167 | 1.158819076   | -3.281999831  | 1.493894264   |
| H168 | 2.070844876   | -3.319344373  | 3.013425709   |
| H169 | -0.972088268  | -3.672140753  | 2.715710478   |
| H170 | -2.667170856  | -10.328763527 | 4.193397531   |
| H171 | -3.816246810  | -2.212690170  | 3.314454773   |
| H172 | -4.007214707  | -5.741739095  | 6.059163901   |
| H173 | -6.406708441  | -3.352273081  | 6.630788626   |
| H174 | -0.227597148  | -1.335954225  | 2.321242544   |
| H175 | 0.620147043   | -1.305431597  | 3.872960145   |
| H176 | 3.371203281   | 3.064930787   | 9.342079610   |
| H177 | -5.559544405  | -1.886827444  | 3.285896143   |
| H178 | -7.025582150  | -2.472527360  | 5.212355079   |
| H179 | -4.501320646  | -0.949664711  | 4.374468339   |
| H180 | -5.994169063  | -1.636449681  | 6.397677488   |
| H181 | -5.109517546  | -3.959713865  | 4.583532423   |
| H182 | -3.404121243  | -2.132342759  | 6.361172127   |
| H183 | -2.705064437  | -4.068382064  | 4.283828273   |
| H184 | -1.156707195  | -1.438847055  | 3.827373592   |
| H185 | -2.533032572  | 3.591381282   | 2.278254587   |
| H186 | -4.016195252  | 3.066968108   | 3.138172417   |
| H187 | -2.814278954  | 4.295988025   | 4.596363508   |
| H188 | -2.749714084  | 2.701459419   | 6.671001232   |
| H189 | -0.248431516  | 4.617533793   | 5.044259632   |
| H190 | 2.165202787   | 4.285559775   | 5.469003092   |
| H191 | 1.232672325   | 1.238942462   | 8.381360184   |
| H192 | -0.969051620  | -5.831197687  | 4.136863060   |
| H193 | 1.371239727   | -8.058845441  | 4.306067302   |
| H194 | 0.711939684   | -8.154319645  | 5.953254567   |
| H195 | -0.862737642  | -8.072712829  | 3.437342504   |
| H196 | -3.664205812  | -9.359410806  | 5.304149223   |
| H197 | -1.187982756  | 1.541740422   | 7.920497259   |
| H198 | 0.803071002   | -3.693071719  | 5.202979586   |
| H199 | -5.325601131  | -6.057145157  | 8.511764205   |
| H200 | -4.230112404  | -7.245002816  | 7.759167318   |
| H201 | -2.310529769  | -5.661908244  | 8.939815355   |
| H202 | 10.876690247  | -1.322130105  | 8.446685843   |
| H203 | 4.292730806   | -2.953927696  | -5.015229756  |
| H204 | 6.430890967   | -6.164359556  | -0.187152241  |
| H205 | 5.464942520   | -1.431373629  | -9.092106650  |
| H206 | 6.013246150   | 0.172322773   | -8.540784945  |
| H207 | 3.221999708   | -1.078882187  | -8.253995229  |
| H208 | 0.389496528   | 4.080545049   | -9.551699810  |
| H209 | 3.863610533   | 0.152090858   | -10.392747017 |
| H210 | 0.012002844   | -2.045562714  | -4.095543050  |
| H211 | 1.178767121   | -4.872175726  | -3.835754482  |
| H212 | 1.978426860   | 2.392303006   | -8.289819404  |
| H213 | -0.339871067  | 1.570087363   | -9.944338267  |
| H214 | 4.103695066   | 2.511339035   | -8.638164243  |
| H215 | 3.847369477   | -3.441897768  | -3.381230176  |
| H216 | 3.677605663   | 0.367913951   | -7.348657452  |
| H217 | 5.218622304   | 1.883146425   | -9.674164605  |
| H218 | -1.061157070  | -4.370716692  | -6.718662555  |
| H219 | -0.550538122  | -3.109601290  | -2.796939016  |
| H220 | 6.574572111   | 0.432421273   | -6.489905193  |
| H221 | 1.687447563   | -3.619540435  | -2.714017001  |
| H222 | -5.325468361  | -1.262814639  | 0.657663198   |
| H223 | -2.738239714  | -1.292308753  | -0.209549669  |
| H224 | -7.026655395  | -5.155449470  | -1.340499041  |
| H225 | -5.019852614  | -4.023258551  | -3.242514530  |
| H226 | -8.214136696  | -1.635025945  | -1.243849287  |
| H227 | -13.182364475 | -0.259650503  | 0.196406334   |

|      |               |              |              |
|------|---------------|--------------|--------------|
| H228 | -9.951159405  | -1.997289799 | 1.361201927  |
| H229 | -10.844335665 | -2.084458830 | -1.219434548 |
| H230 | -9.710138258  | 0.615643726  | -0.261979385 |
| H231 | -13.772958944 | 1.487846930  | -3.614544605 |
| H232 | -5.558814191  | 1.051611622  | -0.298075169 |
| H233 | -6.027440528  | 0.372620486  | -1.858160368 |
| H234 | -14.739267445 | 1.115384736  | -1.279757782 |
| H235 | -10.037400857 | -0.968845290 | -2.328234578 |
| H236 | -5.952942910  | -2.129064825 | -2.091314072 |
| H237 | -5.280783984  | -5.381412420 | -1.187267613 |
| H238 | -7.595101258  | -3.656249079 | -5.594594291 |
| H239 | -1.563077041  | 1.482942815  | -3.200195943 |
| H240 | -6.612772608  | -5.113849573 | -5.831946829 |
| H241 | 3.872912920   | 5.377320244  | 9.005229942  |
| H242 | 2.764212171   | 5.029163957  | 7.854699549  |
| H243 | -2.676720148  | 5.933352226  | 1.219232379  |
| H244 | -4.747048503  | 3.874704929  | 1.071261497  |
| H245 | -4.634687821  | 7.064283888  | 2.628069009  |
| H246 | -4.144152455  | 1.727064278  | -2.871595209 |
| H247 | -5.257613340  | 2.068463412  | -4.597639185 |
| H248 | -6.199651357  | 2.701171550  | -3.476944838 |
| H249 | -3.210153630  | 0.360169977  | -6.006380078 |
| H250 | -4.290311336  | -0.558270918 | -7.095163738 |
| H251 | -7.884348772  | 9.817547974  | 0.241140217  |
| H252 | -9.592484513  | 9.700898975  | -0.273181177 |
| H253 | -6.317173058  | 8.297346924  | -0.642182992 |
| H254 | -6.813122925  | 6.897999968  | -1.549354047 |
| H255 | -5.955692691  | 8.303532072  | -4.627116640 |
| H256 | -2.698401178  | 5.025551476  | -5.044517669 |
| H257 | -10.432913711 | 2.972570485  | -3.128437796 |
| H258 | -8.308679276  | 4.047077279  | 1.242629821  |
| H259 | -7.018299459  | 5.079966393  | -3.682841216 |
| H260 | -1.338251574  | 5.993140281  | -1.182836552 |
| H261 | -1.905503424  | 7.935936194  | 0.188081543  |
| H262 | -2.909771422  | 4.424273972  | -2.416476803 |
| H263 | -4.661720259  | -3.811237326 | -5.811423085 |
| H264 | -2.674489332  | 11.027401265 | 0.350641853  |
| H265 | -2.337401145  | -2.177960457 | -6.165492338 |
| H266 | -1.588012667  | 7.206417221  | -2.440182750 |
| H267 | -6.904298038  | 3.791916532  | -0.768854364 |
| H268 | -5.959885666  | 0.133550213  | -5.383690172 |
| H269 | -3.793028186  | 10.487187019 | 1.620991218  |
| H270 | -4.347638971  | 7.859967223  | -5.054748587 |
| H271 | -7.516385882  | 6.633973319  | -4.270176799 |
| H272 | 0.200309188   | -3.377427248 | -6.257835721 |
| H273 | -1.227073036  | -4.821427099 | -4.472045981 |
| H274 | -11.852566827 | 3.357109930  | -1.133145635 |
| H275 | -3.988900663  | -0.995668907 | -4.069610864 |
| H276 | -4.008222105  | 7.381438946  | -1.835516964 |
| H277 | -2.865228864  | 6.677841121  | -4.467957019 |
| H278 | -1.382387190  | 4.833929946  | -3.181571444 |
| H279 | -4.837672791  | 4.439765310  | -4.027232260 |
| H280 | -6.714034454  | 6.315662238  | 4.470990498  |
| H281 | -7.312305125  | 7.343612344  | 1.391655201  |
| H282 | -9.308478609  | 9.350739767  | 2.160133116  |
| H283 | -5.822413513  | 7.849527271  | 4.385314062  |
| H284 | -9.492289969  | 6.026441193  | 1.899553346  |
| H285 | 8.019863755   | 4.716165903  | -5.254079180 |
| H286 | 8.684149650   | 3.199123081  | -4.622892757 |
| H287 | 10.225902148  | 2.706592443  | -0.478133691 |
| H288 | 10.153876934  | 3.999314566  | -6.308056370 |
| H289 | 9.339982851   | 2.766727689  | -7.018829681 |
| H290 | 0.586362783   | 6.728787926  | 3.672363845  |
| H291 | -1.663735148  | 8.124113052  | 5.266173127  |
| H292 | -0.909605444  | 10.011338858 | 1.470525450  |
| H293 | -1.157357148  | 6.324139233  | 3.590032087  |
| H294 | -0.943596138  | 9.588629774  | 5.174257472  |
| H295 | 3.783762234   | 8.058829285  | -1.881900046 |
| H296 | 0.128148054   | 9.067218188  | 3.144212755  |
| H297 | 6.464543238   | -4.441551893 | 5.954470214  |
| H298 | 9.070430843   | -3.218020243 | 4.902896018  |
| H299 | 3.658747066   | 6.184835796  | -3.165299734 |
| H300 | 1.923214420   | 0.935640755  | 5.236386533  |

|       |               |              |              |
|-------|---------------|--------------|--------------|
| H301  | 2.227932926   | 5.729668531  | -6.417471207 |
| H302  | 2.142605597   | -0.217279870 | -4.468965634 |
| H303  | 1.173988497   | 5.215291831  | -5.103686146 |
| H304  | 4.334189763   | -2.997100541 | 5.306328475  |
| H305  | 3.510274299   | 4.385338378  | -4.049302399 |
| H306  | 5.045015309   | -2.705539946 | 3.715812080  |
| H307  | 6.897421974   | -4.155001746 | 4.255250233  |
| H308  | 7.039728819   | -1.640323600 | 4.794663575  |
| H309  | 6.372441503   | -2.002900985 | 6.399096750  |
| H310  | -0.761715178  | 0.122515995  | -8.170162771 |
| H311  | 8.505793318   | -5.947536766 | 6.014362610  |
| H312  | 10.157737438  | -7.523482939 | 3.926491533  |
| H313  | 1.695112958   | 1.816054502  | -3.082799682 |
| H314  | 9.967257507   | -7.867241464 | 6.811662148  |
| H315  | 9.315269215   | -8.764601598 | 5.606126426  |
| H316  | 4.847036168   | -0.335300358 | 4.032287671  |
| H317  | 0.050081549   | 3.479738032  | -3.837076705 |
| H318  | 0.966240966   | -0.523577819 | -6.633790762 |
| H319  | 12.175248550  | -2.511454860 | 1.570683698  |
| H320  | 10.843867628  | -0.293292106 | -0.591303819 |
| H321  | 9.858835324   | -2.554201273 | 2.357302378  |
| H322  | 12.514595022  | -2.871576625 | 0.108703469  |
| H323  | 4.577646070   | 9.026006634  | -4.409270496 |
| H324  | 7.787374665   | -0.211734943 | 2.495215083  |
| H325  | 6.298069800   | -4.435362684 | 1.030985744  |
| H326  | 5.981218610   | 3.931842267  | -4.482458020 |
| H327  | 8.424962813   | -4.609069328 | -0.427668643 |
| H328  | 9.039624911   | 0.153334848  | -5.116043993 |
| H329  | 6.854556045   | -0.097996185 | -3.839067135 |
| H330  | 11.430937989  | -7.227973741 | 5.115471939  |
| H331  | 3.182059620   | 1.090433187  | 4.049385154  |
| H332  | 9.273516779   | -0.226461360 | 4.398426396  |
| H333  | 7.263277138   | 1.036470517  | 3.260019455  |
| H334  | 9.670544025   | -1.629940404 | 6.287046699  |
| H335  | 3.065572933   | -2.055437647 | 6.640221577  |
| H336  | 10.976078020  | -5.188088801 | -3.286385403 |
| H337  | 9.014452857   | -2.362801824 | -2.425839852 |
| H338  | 9.686842734   | -2.373222480 | -0.781569851 |
| H339  | 7.625415772   | -4.305215088 | -1.995455733 |
| H340  | 4.318232196   | 2.179766177  | -4.465635183 |
| H341  | -1.131182865  | 3.197445808  | -6.035882019 |
| H342  | -1.813679846  | 1.526479006  | -7.877677465 |
| H343  | 5.119319632   | -3.171399623 | 0.556477166  |
| H344  | 10.394634363  | -1.259005680 | 4.106067311  |
| H345  | 10.812043626  | -3.319006137 | 3.322633493  |
| H346  | 1.638694992   | -1.120675647 | 6.384808817  |
| H347  | 11.021167016  | 0.617968518  | -3.548499722 |
| H348  | 9.407592944   | 0.406888746  | 0.153322908  |
| H349  | 4.730029682   | 1.825206000  | -6.169107264 |
| H350  | 2.219954902   | 8.586751617  | -2.538209673 |
| H351  | 3.566380792   | 1.505124482  | 7.483198904  |
| H352  | 3.940337025   | 2.814259037  | 6.335378951  |
| H353  | 12.436113395  | 2.972045780  | -1.191278134 |
| H354  | 12.744247326  | 1.365847009  | -1.199720181 |
| H355  | 13.185305008  | -0.064955961 | 3.065964170  |
| H356  | 12.126933747  | -0.056998792 | 1.042476463  |
| H357  | 14.031538076  | 2.402602355  | 2.241982088  |
| H358  | 11.781766413  | 0.846587927  | 3.666042185  |
| H359  | 6.029578991   | 3.715554770  | 7.933564849  |
| H360  | -12.180077172 | 6.226664390  | 3.483998925  |
| H361  | 9.657134467   | -2.382457870 | 9.202388866  |
| H362  | 7.974099005   | -0.334629989 | 8.366678045  |
| H363  | -12.036918987 | 5.807701821  | 0.499170505  |
| H364  | -10.556943627 | 3.816169992  | 2.328126740  |
| H365  | -11.987812557 | 3.445349289  | 1.356483459  |
| H366  | 3.374104548   | -1.186404762 | -0.773540102 |
| H367  | -8.317662509  | 2.987227282  | -3.954145907 |
| H368  | 0.951322316   | -0.451241310 | 0.353665729  |
| H369  | -0.770959740  | -0.228069704 | -1.512214330 |
| Mo370 | 6.222473419   | -0.031209069 | -0.555591587 |
| N371  | 0.463801734   | -8.195044952 | -5.523114262 |
| N372  | -3.186178600  | -8.266975193 | -4.747420787 |
| N373  | -3.804341001  | -9.789645475 | -2.439224199 |

|      |               |               |              |
|------|---------------|---------------|--------------|
| N374 | -1.458594905  | -9.581284386  | -0.908709357 |
| N375 | -1.431926422  | -6.781010224  | -0.301635792 |
| N376 | -3.814869895  | -6.661247351  | 1.252500577  |
| N377 | -3.370130227  | -8.540645595  | 3.398522762  |
| N378 | -0.722169085  | -8.122941030  | 4.450435356  |
| N379 | -0.190907105  | -5.387608279  | 4.619992356  |
| N380 | -2.529077400  | -3.608151645  | 5.179522055  |
| N381 | -4.011371776  | -5.333230930  | 6.996090337  |
| N382 | 9.495919068   | -7.805913964  | 5.906801631  |
| N383 | 8.976725678   | -5.203563110  | 5.488157498  |
| N384 | 4.426561712   | -0.983847336  | 4.706959854  |
| N385 | 2.558423449   | -1.398805445  | 6.057155408  |
| N386 | 2.613030319   | 0.459620746   | 4.656795078  |
| N387 | 9.432181621   | -2.161419510  | 7.153048430  |
| N388 | -0.818111051  | -3.546762776  | -6.165084184 |
| N389 | 3.571476381   | -3.231522921  | -4.342472128 |
| N390 | -2.975678658  | -2.269791495  | -5.358245432 |
| N391 | -5.516971632  | -3.380386412  | -5.467271335 |
| N392 | -5.935253658  | -4.347381005  | -2.905071402 |
| N393 | -5.963720183  | -2.226162490  | -1.076645762 |
| N394 | -3.520890302  | 1.050417649   | -2.360334121 |
| N395 | -1.782993727  | -0.047561103  | -1.693916395 |
| N396 | -8.382235803  | -1.009812700  | -0.459721797 |
| N397 | -12.095684191 | 0.339129722   | -2.896078881 |
| N398 | -13.839461662 | 0.757918213   | -1.588726505 |
| N399 | 3.727698359   | 4.841581245   | 8.145912637  |
| N400 | -0.810161640  | 8.597812015   | 4.952676259  |
| N401 | -1.845168579  | 9.718832856   | 1.739051911  |
| N402 | -2.801926831  | 8.066429712   | -0.305714312 |
| N403 | -4.535343929  | 5.418402331   | -4.172624092 |
| N404 | -5.197397685  | 7.633325733   | -4.549695948 |
| N405 | -6.762191443  | 6.029133048   | -3.959470495 |
| N406 | -3.610890784  | 5.610408250   | 0.920539732  |
| N407 | -5.523796789  | 6.572704468   | 2.764198995  |
| N408 | -8.000524053  | 7.753364524   | 2.026483428  |
| N409 | -7.078897263  | 7.688240096   | -0.963349371 |
| N410 | -10.389540827 | 6.422662505   | 1.629879272  |
| N411 | 9.235338574   | 3.719352472   | -6.658192310 |
| N412 | 5.915439952   | 3.272284455   | -5.267023246 |
| N413 | 3.163484018   | 4.513071997   | -5.020610457 |
| N414 | 3.181576555   | 7.002589542   | -3.567174682 |
| N415 | 4.215093501   | 2.008869580   | -9.527579299 |
| N416 | 1.428244473   | 1.817163851   | -8.936587087 |
| N417 | 12.005224312  | 2.058135742   | -1.358512174 |
| N418 | 8.061225327   | 0.253405349   | -2.090900547 |
| N419 | 8.963092495   | 0.243894880   | -4.106729214 |
| N420 | 12.078347437  | 0.823816362   | 1.554975237  |
| N421 | -1.655091628  | 2.349674644   | 0.235523393  |
| N422 | -0.524274360  | 2.387160349   | 0.218058892  |
| O423 | -1.422451940  | -7.765309740  | -3.398615533 |
| O424 | -4.467280261  | -7.869048557  | -1.406915554 |
| O425 | -2.653134560  | -10.168809896 | 0.950462297  |
| O426 | -0.382515452  | -7.354319204  | 1.634876612  |
| O427 | -2.879201583  | -4.914780257  | 2.373886248  |
| O428 | -4.571409921  | -7.094896254  | 4.695954779  |
| O429 | -1.449352644  | -9.008759313  | 6.439134009  |
| O430 | 1.805716724   | -5.775432757  | 5.688688023  |
| O431 | -0.975188542  | -2.753385347  | 6.622394643  |
| O432 | -4.064814916  | -3.496073970  | 8.326829727  |
| O433 | -3.548638768  | -6.371834087  | 10.400990634 |
| O434 | 10.861799950  | -4.886044951  | 4.184919617  |
| O435 | 8.443532898   | -4.042852157  | 8.032216590  |
| O436 | 9.356268178   | 0.422573804   | 9.661605259  |
| O437 | -3.136389250  | -3.407133441  | -3.371348097 |
| O438 | 1.957630323   | -3.026272625  | -5.932001653 |
| O439 | -6.451593418  | -1.477732979  | -4.618351461 |
| O440 | -5.218301190  | 0.702861345   | -5.710888428 |
| O441 | -8.054806200  | -5.046051547  | -3.461645808 |
| O442 | -5.997838261  | -3.677459675  | 0.690160506  |
| O443 | -7.439919274  | 0.074871942   | 1.317276143  |
| O444 | -11.002589735 | -0.306775181  | 1.808771423  |
| O445 | 5.804725092   | 2.223644387   | 9.310598922  |
| O446 | -2.197176753  | 3.327742050   | 6.168076617  |

|                              |               |               |               |
|------------------------------|---------------|---------------|---------------|
| O447                         | -3.110035865  | 8.416166316   | 3.113314148   |
| O448                         | -4.731555664  | 9.307614143   | -0.438284536  |
| O449                         | -5.047008211  | 5.351244696   | -0.842211318  |
| O450                         | -6.498120593  | 4.499919284   | 2.805626072   |
| O451                         | -3.153239212  | 4.836433186   | 3.852623809   |
| O452                         | -8.365673333  | 8.431269949   | 4.185865430   |
| O453                         | -11.484338054 | 8.340124616   | 1.048987673   |
| O454                         | -9.266513660  | 7.459567205   | -1.582315372  |
| O455                         | -13.717284054 | 5.346098678   | 2.471356693   |
| O456                         | -7.760025063  | 3.246054955   | -3.194755449  |
| O457                         | 7.094371923   | 1.982772855   | -6.760367765  |
| O458                         | 3.133424641   | 3.568048987   | -7.108930759  |
| O459                         | 1.709152879   | 7.871302205   | -5.069333690  |
| O460                         | 3.861145716   | 10.535013081  | -3.237076627  |
| O461                         | 1.395341555   | 0.034350980   | -10.361516999 |
| O462                         | 5.473451132   | -2.441937798  | -6.662682603  |
| O463                         | 6.415742251   | -0.495269420  | -6.127149085  |
| O464                         | -1.403690259  | 3.938308499   | -8.596879531  |
| O465                         | 11.367148885  | 2.967232341   | 1.734825455   |
| O466                         | 13.735729428  | 2.495904407   | 4.259904400   |
| O467                         | 4.393200635   | -4.460715487  | -1.632233215  |
| O468                         | 5.748126404   | -6.052553114  | -0.876218304  |
| O469                         | 11.602922981  | -3.845005590  | -1.538510447  |
| O470                         | 10.165834475  | -4.678593107  | -3.070979492  |
| O471                         | 7.707657009   | -0.985774972  | 0.844020786   |
| O472                         | 8.356069233   | -2.987102921  | 1.649659485   |
| O473                         | 6.501287236   | -1.989468308  | -1.253226266  |
| O474                         | 10.062603940  | -0.651486396  | 4.819361869   |
| O475                         | 7.774032295   | 0.213243627   | 3.390657908   |
| O476                         | -5.267341761  | 2.671812552   | -3.806045597  |
| O477                         | 12.899983760  | -2.440105774  | 0.899068676   |
| O478                         | 10.747829914  | -2.472049244  | 2.809773076   |
| S479                         | -0.222317387  | 6.623498256   | 1.366021497   |
| S480                         | 1.176706859   | 4.323817358   | -1.098445564  |
| S481                         | 4.717948454   | 0.461792024   | -2.357562727  |
| S482                         | 1.217069974   | 3.142781095   | 2.395061694   |
| S483                         | 1.314975973   | 0.301718472   | -0.726640616  |
| S484                         | 4.917627510   | 4.347344079   | -2.228429866  |
| S485                         | 4.654631955   | -0.646253909  | 1.178422859   |
| S486                         | 3.595376445   | 5.561267810   | 1.297812574   |
| S487                         | 6.817739798   | 2.163976229   | 0.142819520   |
| S488                         | 4.807277582   | 2.426613541   | 3.278984018   |
| C 35(3/2)                    |               |               |               |
| TS                           |               |               |               |
| Fe( 139)                     | 0.550         | -2.431        |               |
| Fe( 140)                     | 0.514         | -1.617        |               |
| Fe( 141)                     | 0.539         | -2.524        |               |
| Fe( 142)                     | 0.575         | 2.864         |               |
| Fe( 143)                     | 0.558         | 2.959         |               |
| Fe( 144)                     | 0.508         | 2.201         |               |
| Fe( 145)                     | 0.364         | 1.254         |               |
| bm22b6x2n2xd35td 1 53087.376 |               |               |               |
| C1                           | -1.848969192  | -8.891499050  | -2.751519954  |
| C2                           | -0.920227461  | -9.578132447  | -3.757680364  |
| C3                           | -4.175352974  | -8.383362303  | -2.144616257  |
| C4                           | -4.159713885  | -8.796639665  | -0.673844973  |
| C5                           | -3.703328460  | -10.546695383 | 0.970989508   |
| C6                           | -2.558460603  | -9.905551854  | 1.764136723   |
| C7                           | -0.361450998  | -8.824211235  | 1.664963258   |
| C8                           | -0.723470565  | -7.376515942  | 2.011003445   |
| C9                           | -1.903322069  | -5.345331730  | 1.351397963   |
| C10                          | -2.909736418  | -5.271958147  | 2.510161727   |
| C11                          | -4.814780908  | -6.264804963  | 3.638518476   |
| C12                          | -4.238212973  | -6.620512822  | 5.015855046   |
| C13                          | -2.890052056  | -8.192335924  | 6.318976729   |
| C14                          | -1.631956505  | -7.536950710  | 6.904364052   |
| C15                          | 0.563175940   | -6.532203692  | 6.434208214   |
| C16                          | 0.780805842   | -5.022740346  | 6.291108370   |
| C17                          | -0.124571374  | -2.901229882  | 5.376459153   |
| C18                          | -1.239388567  | -2.180094567  | 6.156224824   |
| C19                          | -0.107042973  | -2.558847952  | 3.862332547   |
| C20                          | -0.260066188  | -1.054090429  | 3.616810121   |
| C21                          | 1.168167656   | -3.100222064  | 3.205327305   |
| C22                          | -3.660126674  | -1.847202259  | 6.463878723   |
| C23                          | -3.919033444  | -2.448678916  | 7.858034694   |
| C24                          | -4.912420334  | -1.890046265  | 5.555437839   |
| C25                          | -6.145277822  | -1.342797149  | 6.284077181   |
| C26                          | -4.666392755  | -1.112550242  | 4.256465049   |
| C27                          | -4.306139452  | -4.431040501  | 9.201327098   |
| C28                          | -3.320559291  | -4.049413433  | 10.287394825  |
| C29                          | 10.337169635  | -5.983635195  | 6.262867938   |

|      |               |              |              |
|------|---------------|--------------|--------------|
| C30  | 10.073504858  | -4.527275901 | 5.873182151  |
| C31  | 8.507678116   | -2.621907637 | 6.286707278  |
| C32  | 8.795293047   | -1.860052642 | 7.595855670  |
| C33  | 7.009435214   | -2.617476563 | 5.941499994  |
| C34  | 6.427843801   | -1.218528346 | 5.717859203  |
| C35  | 5.013518052   | -1.311674819 | 5.145239168  |
| C36  | 3.226911539   | 0.440751904  | 5.182029812  |
| C37  | 9.821235288   | 0.131971950  | 8.584116030  |
| C38  | 8.979471695   | 1.379514258  | 8.760044373  |
| C39  | -1.147280829  | -4.626921161 | -3.883004605 |
| C40  | -2.515921437  | -3.957012554 | -3.686647044 |
| C41  | -0.108097484  | -3.796707241 | -3.092563354 |
| C42  | 1.269937769   | -4.451907815 | -2.874685761 |
| C43  | 2.291516957   | -4.203783982 | -3.983190082 |
| C44  | -4.104177827  | -2.395192620 | -4.704579347 |
| C45  | -5.462444022  | -3.076942041 | -4.533276039 |
| C46  | -4.153622785  | -1.413508370 | -5.894902557 |
| C47  | -6.702934723  | -5.164197349 | -4.291258784 |
| C48  | -6.959975901  | -5.239268105 | -2.778156075 |
| C49  | -6.057736757  | -4.870023149 | -0.519553900 |
| C50  | -5.996139865  | -3.518010758 | 0.189003297  |
| C51  | -5.933691411  | -1.067871646 | -0.010781748 |
| C52  | -7.326810355  | -0.557639099 | 0.431098260  |
| C53  | -5.398244319  | -0.010348438 | -0.987606506 |
| C54  | -3.964680050  | -0.120293683 | -1.397907177 |
| C55  | -2.851017120  | -0.703475860 | -0.843109759 |
| C56  | -2.200203903  | 0.377923446  | -2.671681187 |
| C57  | -9.720081012  | -0.526268350 | -0.156798940 |
| C58  | -10.262854118 | -0.729445096 | 1.253215423  |
| C59  | -10.614978672 | -1.272721297 | -1.180371607 |
| C60  | -11.875321578 | -0.567645670 | -1.586302419 |
| C61  | -12.955371366 | -0.156174458 | -0.827878178 |
| C62  | -13.281141134 | 0.334747674  | -2.963700273 |
| C63  | 3.877863196   | 5.044973598  | 7.566081678  |
| C64  | 5.351170253   | 4.754491721  | 7.782799323  |
| C65  | 3.354015301   | 3.971429428  | 6.577851796  |
| C66  | 1.880673445   | 4.109642240  | 6.276406543  |
| C67  | 0.910494306   | 3.494362789  | 7.090090847  |
| C68  | 1.438032297   | 4.848481649  | 5.164805451  |
| C69  | -0.454922025  | 3.604453116  | 6.803466128  |
| C70  | 0.079780559   | 4.978150170  | 4.874097343  |
| C71  | -0.865381847  | 4.352032145  | 5.693083214  |
| C72  | -0.705943029  | 8.975127961  | 1.713895866  |
| C73  | -1.998781219  | 9.229005532  | 0.927998841  |
| C74  | -0.358953349  | 7.477326611  | 1.700809799  |
| C75  | -2.993694838  | 10.150088403 | -1.118293788 |
| C76  | -3.583558574  | 8.937577684  | -1.842423891 |
| C77  | -3.262528059  | 6.588830947  | -2.522153015 |
| C78  | -4.040733408  | 5.703106523  | -1.525498420 |
| C79  | -2.065814496  | 5.860015199  | -3.161695809 |
| C80  | -2.354413078  | 4.558194401  | -3.916495150 |
| C81  | -3.076774699  | 4.678026312  | -5.272234939 |
| C82  | -5.480358383  | 5.358680721  | -5.465369637 |
| C83  | -4.334622359  | 4.899467307  | 0.762108931  |
| C84  | -5.556959356  | 5.630378257  | 1.357060615  |
| C85  | -3.459455114  | 4.425173215  | 1.928260269  |
| C86  | -6.381484715  | 7.742222477  | 2.272656564  |
| C87  | -7.667897627  | 8.336652468  | 1.702791309  |
| C88  | -9.100827339  | 8.644966678  | -0.280771731 |
| C89  | -10.436416262 | 7.872089408  | -0.223629274 |
| C90  | -8.727341658  | 8.965067490  | -1.747837812 |
| C91  | -8.392191984  | 7.698617168  | -2.525906671 |
| C92  | -11.533822153 | 5.730348526  | 0.300816516  |
| C93  | -12.553857849 | 6.139990095  | 1.357968272  |
| C94  | -11.076714320 | 4.267078683  | 0.546886729  |
| C95  | -10.193807637 | 3.736931235  | -0.561249317 |
| C96  | -10.762832543 | 3.165038111  | -1.709382065 |
| C97  | -8.794262557  | 3.841490927  | -0.498759713 |
| C98  | -9.969514999  | 2.734937010  | -2.776233457 |
| C99  | -7.984990593  | 3.439797546  | -1.566193213 |
| C100 | -8.585843427  | 2.895995127  | -2.699473151 |
| C101 | 8.292780048   | 2.489243298  | -6.169383011 |
| C102 | 7.038785121   | 1.657241874  | -6.383409756 |

|       |              |               |              |
|-------|--------------|---------------|--------------|
| C103  | 4.622648839  | 1.473011998   | -5.845212944 |
| C104  | 3.561072553  | 2.331910304   | -6.541364316 |
| C105  | 2.197225459  | 4.359105932   | -6.359805396 |
| C106  | 2.348238927  | 5.821506478   | -5.949338555 |
| C107  | 3.212488475  | 7.507205375   | -4.429433456 |
| C108  | 3.968215261  | 8.442007017   | -5.352939565 |
| C109  | 3.553886103  | -1.244631180  | -9.422223597 |
| C110  | 2.032284303  | -1.151874333  | -9.599250409 |
| C111  | 3.881787167  | -1.872519974  | -8.046464950 |
| C112  | 5.346961752  | -2.345872996  | -7.989363445 |
| C113  | 5.749297541  | -2.682849878  | -6.571402869 |
| C114  | -0.017334797 | 0.118638509   | -9.171280857 |
| C115  | -0.360563442 | 1.551000355   | -9.534685112 |
| C116  | -0.780701535 | -0.435231961  | -7.939850922 |
| C117  | -0.168970066 | -0.018275355  | -6.624336658 |
| C118  | -0.430492699 | 1.241893539   | -6.057458823 |
| C119  | 0.752562480  | -0.864171974  | -5.980298988 |
| C120  | 0.238100839  | 1.651142781   | -4.897278514 |
| C121  | 1.420630777  | -0.454830647  | -4.820627284 |
| C122  | 1.173363564  | 0.811082921   | -4.280947125 |
| C123  | 10.916365863 | 1.743152884   | -0.750320149 |
| C124  | 11.445928753 | 2.094787742   | 0.648431726  |
| C125  | 10.156178668 | 0.406884332   | -0.755367759 |
| C126  | 9.444393385  | 0.064949801   | -2.026776933 |
| C127  | 10.010876230 | -0.185522907  | -3.261394463 |
| C128  | 7.832830425  | -0.576250006  | -3.353622135 |
| C129  | 12.593833046 | 1.409641557   | 2.678376950  |
| C130  | 13.516953979 | 2.608772069   | 2.670943497  |
| C131  | 5.275429361  | -4.836921727  | 0.147888161  |
| C132  | 5.907155555  | -3.741433725  | 0.960689971  |
| C133  | 7.049241836  | -2.967318111  | 0.190578576  |
| C134  | 8.108526815  | -3.980785055  | -0.326599927 |
| C135  | 9.325048332  | -3.282175768  | -0.956686661 |
| C136  | 10.479870049 | -4.206149413  | -1.220221088 |
| C137  | 7.760053991  | -2.064250581  | 1.247110249  |
| C138  | 3.529656596  | 2.399658009   | -0.325049902 |
| Fe139 | 4.999454405  | 2.075847866   | -1.643598143 |
| Fe140 | 1.548921397  | 2.409442256   | -0.280964240 |
| Fe141 | 3.373895097  | 3.713784654   | 1.149144934  |
| Fe142 | 3.389100500  | 4.052990806   | -1.435754971 |
| Fe143 | 1.359085556  | 5.049391564   | 0.091776920  |
| Fe144 | 4.956843497  | 1.744924246   | 0.892033532  |
| Fe145 | 3.571158821  | 0.098049496   | -0.551640777 |
| H146  | 0.829645562  | -9.159360659  | -2.797642894 |
| H147  | 0.526723401  | -8.163994932  | -4.057478777 |
| H148  | -3.489293628 | -9.497843312  | -3.835601043 |
| H149  | -1.336894672 | -9.466242008  | -4.770642050 |
| H150  | -0.954911254 | -10.658101853 | -3.531165222 |
| H151  | -4.022565110 | -7.295002958  | -2.158219399 |
| H152  | -3.571706902 | -10.698840226 | -1.172426019 |
| H153  | -5.171016297 | -8.596577035  | -2.557288598 |
| H154  | -3.554593828 | -11.634758910 | 0.955298249  |
| H155  | -1.499567476 | -9.587346156  | 0.032835058  |
| H156  | -4.631035426 | -10.333164936 | 1.517700473  |
| H157  | -1.062699995 | -4.692174420  | 1.619987125  |
| H158  | -1.626675270 | -7.125054074  | 0.170472070  |
| H159  | 0.492271085  | -8.832162347  | 0.973524654  |
| H160  | -5.276180350 | -5.272342064  | 3.724257632  |
| H161  | -3.890957708 | -6.958607891  | 1.821528603  |
| H162  | -0.055241967 | -9.311023166  | 2.598756613  |
| H163  | -2.369304225 | -4.955393192  | 0.434895609  |
| H164  | -3.188593774 | -8.208780737  | 4.203281676  |
| H165  | -5.597308898 | -6.993936597  | 3.386582767  |
| H166  | 1.271998891  | -4.183636252  | 3.361395996  |
| H167  | 1.151543481  | -2.914015272  | 2.120149386  |
| H168  | 2.064801641  | -2.605333986  | 3.611067467  |
| H169  | -0.974027836 | -3.064662036  | 3.407371025  |
| H170  | -2.670373015 | -9.261360562  | 6.184463259  |
| H171  | -3.810082651 | -1.503725233  | 3.689540532  |
| H172  | -3.999178919 | -4.391093922  | 7.095235627  |
| H173  | -6.400828396 | -1.932891483  | 7.176267061  |
| H174  | -0.269139148 | -0.852662607  | 2.534568722  |
| H175  | 0.576015010  | -0.483448848  | 4.046276353  |

|      |               |              |               |
|------|---------------|--------------|---------------|
| H176 | 3.362041247   | 4.895791040  | 8.533764921   |
| H177 | -5.551061295  | -1.175991575 | 3.606731715   |
| H178 | -7.014256953  | -1.359206259 | 5.609696761   |
| H179 | -4.479936103  | -0.049191924 | 4.475991073   |
| H180 | -5.981265153  | -0.299530445 | 6.599480944   |
| H181 | -5.102574289  | -2.947152825 | 5.296596551   |
| H182 | -3.393510500  | -0.796992126 | 6.657924049   |
| H183 | -2.698665484  | -3.117607926 | 5.021239600   |
| H184 | -1.198283679  | -0.659578130 | 4.035191772   |
| H185 | -2.534775351  | 3.979405954  | 1.528878926   |
| H186 | -4.029020558  | 3.637563506  | 2.449800739   |
| H187 | -2.809365614  | 5.139113211  | 3.631931215   |
| H188 | -2.751112255  | 3.975247999  | 5.961661406   |
| H189 | -0.247667562  | 5.534754897  | 3.995952098   |
| H190 | 2.170249687   | 5.301600824  | 4.492832205   |
| H191 | 1.223378736   | 2.906916585  | 7.958044588   |
| H192 | -0.958801948  | -4.872417237 | 5.229338065   |
| H193 | 1.365808507   | -7.025317353 | 5.865406678   |
| H194 | 0.699702092   | -6.779607980 | 7.495185802   |
| H195 | -0.858731638  | -7.208214159 | 5.005817422   |
| H196 | -3.673035028  | -8.093812446 | 7.080907157   |
| H197 | -1.195515622  | 3.104936757  | 7.435050293   |
| H198 | 0.813610161   | -2.560244605 | 5.835297230   |
| H199 | -5.325464656  | -4.199819273 | 9.550286504   |
| H200 | -4.238612226  | -5.521778632 | 9.064002525   |
| H201 | -2.312694092  | -3.739277430 | 9.922989386   |
| H202 | 10.882402101  | 0.416746709  | 8.525930876   |
| H203 | 4.288550757   | -3.904731609 | -4.301728323  |
| H204 | 6.426331303   | -6.077176108 | 1.070121277   |
| H205 | 5.458797936   | -3.250214232 | -8.603988539  |
| H206 | 6.010950374   | -1.568164061 | -8.393798472  |
| H207 | 3.219114198   | -2.729205323 | -7.849570117  |
| H208 | 0.401388813   | 2.052191058  | -10.176414014 |
| H209 | 3.863852571   | -1.963560811 | -10.196702817 |
| H210 | 0.017977545   | -2.823984350 | -3.594887947  |
| H211 | 1.163242825   | -5.546049687 | -2.772150936  |
| H212 | 1.976793932   | 0.657848039  | -8.586094610  |
| H213 | -0.336451306  | -0.476392600 | -10.050081773 |
| H214 | 4.100471741   | 0.706022870  | -8.964105657  |
| H215 | 3.842264638   | -4.042267065 | -2.602629949  |
| H216 | 3.678470939   | -1.129929252 | -7.259099598  |
| H217 | 5.216515659   | -0.119809812 | -9.850521216  |
| H218 | -1.067380754  | -5.637105231 | -5.682089648  |
| H219 | -0.544137449  | -3.597579890 | -2.102688070  |
| H220 | 6.575606811   | -0.895495879 | -6.437813966  |
| H221 | 1.685426549   | -4.100724641 | -1.919088410  |
| H222 | -5.321074323  | -1.103196550 | 0.900665175   |
| H223 | -2.730478284  | -1.305165555 | 0.049393378   |
| H224 | -7.028163828  | -5.323308384 | -0.272157002  |
| H225 | -5.021558860  | -4.594014077 | -2.362620992  |
| H226 | -8.208518258  | -1.855050178 | -0.891479607  |
| H227 | -13.163035871 | -0.196136113 | 0.235967685   |
| H228 | -9.949669490  | -1.695371892 | 1.720258432   |
| H229 | -10.827778579 | -2.284789962 | -0.794478125  |
| H230 | -9.703613074  | 0.552119553  | -0.376935887  |
| H231 | -13.778019982 | 0.711098108  | -3.854009518  |
| H232 | -5.546141303  | 0.969611272  | -0.505004797  |
| H233 | -6.030601666  | -0.007588189 | -1.890371373  |
| H234 | -14.732636679 | 0.833467485  | -1.487876492  |
| H235 | -10.022634397 | -1.405752355 | -2.098805706  |
| H236 | -5.943317914  | -2.510831506 | -1.615624200  |
| H237 | -5.284674619  | -5.513521944 | -0.074852971  |
| H238 | -7.595903729  | -4.710673198 | -4.741490913  |
| H239 | -1.566999242  | 0.797412220  | -3.450023788  |
| H240 | -6.612609904  | -6.186788118 | -4.679563929  |
| H241 | 3.871707700   | 7.087571905  | 7.735107099   |
| H242 | 2.774008563   | 6.515943504  | 6.665754836   |
| H243 | -2.672901064  | 6.062795856  | -0.009630949  |
| H244 | -4.733819385  | 4.006137029  | 0.262973167   |
| H245 | -4.624899753  | 7.444893885  | 1.136512677   |
| H246 | -4.149627841  | 1.108481925  | -3.168913728  |
| H247 | -5.257309103  | 1.108752022  | -4.918863400  |
| H248 | -6.194533958  | 1.955871590  | -3.945391527  |



|      |               |              |              |
|------|---------------|--------------|--------------|
| H249 | -3.205744611  | -0.860166973 | -5.946166911 |
| H250 | -4.292014129  | -1.968141682 | -6.837978330 |
| H251 | -7.881915908  | 9.668444388  | -1.743132915 |
| H252 | -9.594658033  | 9.447986859  | -2.216198092 |
| H253 | -6.316116893  | 8.011135848  | -2.327158685 |
| H254 | -6.813258026  | 6.457691521  | -2.930425657 |
| H255 | -5.955455302  | 7.186458369  | -6.250995072 |
| H256 | -2.687868247  | 3.921993664  | -5.970703674 |
| H257 | -10.430166894 | 2.271440858  | -3.651704222 |
| H258 | -8.306289787  | 4.238421040  | 0.395287295  |
| H259 | -7.011833821  | 4.239079957  | -4.636578255 |
| H260 | -1.329621835  | 5.631901156  | -2.375021902 |
| H261 | -1.907739094  | 7.811333590  | -1.409393027 |
| H262 | -2.897577506  | 3.845088703  | -3.276433029 |
| H263 | -4.662399193  | -4.903659686 | -4.919219324 |
| H264 | -2.694419022  | 10.884432381 | -1.878607173 |
| H265 | -2.341485423  | -3.379995807 | -5.596927510 |
| H266 | -1.577576163  | 6.573456475  | -3.846554444 |
| H267 | -6.904071350  | 3.587573789  | -1.523300820 |
| H268 | -5.956902937  | -0.945697249 | -5.298791003 |
| H269 | -3.811237665  | 10.587724332 | -0.528434017 |
| H270 | -4.349444271  | 6.658870569  | -6.586003228 |
| H271 | -7.512621760  | 5.625265894  | -5.549404864 |
| H272 | 0.198064345   | -4.573525084 | -5.437099860 |
| H273 | -1.228145287  | -5.614514897 | -3.390011848 |
| H274 | -11.846557049 | 3.043181116  | -1.774090401 |
| H275 | -3.995688647  | -1.798402370 | -3.783679619 |
| H276 | -3.997585624  | 6.856769226  | -3.292594135 |
| H277 | -2.865900431  | 5.655376822  | -5.724295666 |
| H278 | -1.372315264  | 4.102918064  | -4.106992307 |
| H279 | -4.828830476  | 3.544181885  | -4.835388306 |
| H280 | -6.684526306  | 7.097612803  | 3.112010841  |
| H281 | -7.299694881  | 7.484868522  | -0.127399451 |
| H282 | -9.295816692  | 9.596377973  | 0.234973015  |
| H283 | -5.805801502  | 8.581854960  | 2.683985941  |
| H284 | -9.485381354  | 6.286088707  | 0.634647918  |
| H285 | 8.022275500   | 3.552035977  | -6.081875237 |
| H286 | 8.695224654   | 2.177533964  | -5.183111053 |
| H287 | 10.216087764  | 2.551963592  | -1.006348477 |
| H288 | 10.145730798  | 2.660812495  | -7.001405241 |
| H289 | 9.345527802   | 1.299899436  | -7.440501603 |
| H290 | 0.597054130   | 7.346435575  | 2.223791005  |
| H291 | -1.665047200  | 9.021513598  | 3.514035995  |
| H292 | -0.922505566  | 10.110566866 | -0.586252847 |
| H293 | -1.147102367  | 6.927986745  | 2.235860461  |
| H294 | -0.944087163  | 10.440021297 | 3.134449241  |
| H295 | 3.729614138   | 7.504224136  | -3.456795975 |
| H296 | 0.116836165   | 9.532652270  | 1.239807076  |
| H297 | 6.460757081   | -3.130877993 | 6.748602477  |
| H298 | 9.072509019   | -2.171804750 | 5.461472302  |
| H299 | 3.650795332   | 5.419293752  | -4.362761344 |
| H300 | 1.929054833   | 1.986530502  | 4.923004492  |
| H301 | 2.241351034   | 4.319564101  | -7.455789276 |
| H302 | 2.151946465   | -1.112722966 | -4.343971178 |
| H303 | 1.171454758   | 4.066695015  | -6.076715664 |
| H304 | 4.346801093   | -1.835299347 | 5.842026216  |
| H305 | 3.508795108   | 3.484989879  | -4.857660959 |
| H306 | 5.027580899   | -1.901843966 | 4.213853525  |
| H307 | 6.890023202   | -3.218178921 | 5.025851300  |
| H308 | 7.052991609   | -0.653862085 | 5.008806546  |
| H309 | 6.404677346   | -0.649663218 | 6.661335742  |
| H310 | -0.776353337  | -1.532439749 | -8.017341191 |
| H311 | 8.504068860   | -4.614744681 | 7.106680158  |
| H312 | 10.131286663  | -6.583965612 | 5.363663482  |
| H313 | 1.703581479   | 1.155276231  | -3.390845056 |
| H314 | 9.974485865   | -6.342019161 | 8.260630742  |
| H315 | 9.305786738   | -7.457834208 | 7.264945057  |
| H316 | 4.875091016   | 0.504560083  | 4.041740271  |
| H317 | 0.055704476   | 2.634473298  | -4.457064749 |
| H318 | 0.958495316   | -1.854394024 | -6.394042801 |
| H319 | 12.169251160  | -2.146812856 | 2.043670625  |
| H320 | 10.871614424  | -0.406600659 | -0.537401469 |
| H321 | 9.857667933   | -2.020779342 | 2.823452964  |

|       |               |               |              |
|-------|---------------|---------------|--------------|
| H322  | 12.511585482  | -2.803894754  | 0.687500615  |
| H323  | 4.617435874   | 7.939426227   | -6.109851717 |
| H324  | 7.790945398   | 0.304730532   | 2.480446184  |
| H325  | 6.317499083   | -4.133041752  | 1.903331506  |
| H326  | 5.981703505   | 2.951406826   | -5.190005138 |
| H327  | 8.440495170   | -4.600530909  | 0.521583666  |
| H328  | 9.057866502   | -0.884353241  | -5.049757813 |
| H329  | 6.871658986   | -0.876974459  | -3.749718499 |
| H330  | 11.420619040  | -6.063856323  | 6.452967251  |
| H331  | 3.215558429   | 1.912352093   | 3.750097160  |
| H332  | 9.275632427   | 0.661886591   | 4.354414410  |
| H333  | 7.272944815   | 1.679634766   | 2.988765191  |
| H334  | 9.668494280   | -0.327805030  | 6.485255064  |
| H335  | 3.058361889   | -0.660019416  | 6.915525825  |
| H336  | 10.969797718  | -5.763206702  | -2.176044110 |
| H337  | 9.015695063   | -2.818868913  | -1.904930244 |
| H338  | 9.699534961   | -2.487340394  | -0.302630083 |
| H339  | 7.637157633   | -4.635462403  | -1.074933626 |
| H340  | 4.319621885   | 1.240773897   | -4.812020329 |
| H341  | -1.144773889  | 1.908631713   | -6.548323126 |
| H342  | -1.822384411  | -0.089501908  | -8.026188046 |
| H343  | 5.135475863   | -2.993225925  | 1.185272882  |
| H344  | 10.395784093  | -0.408870073  | 4.277607157  |
| H345  | 10.808248764  | -2.583470524  | 3.921817053  |
| H346  | 1.647071488   | 0.225513172   | 6.480236386  |
| H347  | 11.036868732  | -0.117908115  | -3.602751831 |
| H348  | 9.425937399   | 0.407968188   | 0.062436222  |
| H349  | 4.726940218   | 0.543273832   | -6.407941179 |
| H350  | 2.202171824   | 7.913098510   | -4.265177380 |
| H351  | 3.555234461   | 2.987783295   | 7.029238847  |
| H352  | 3.933596390   | 4.034461873   | 5.643546887  |
| H353  | 12.425424065  | 2.695040523   | -1.764268927 |
| H354  | 12.746170865  | 1.118963973   | -1.466792127 |
| H355  | 13.189318935  | 0.543792476   | 3.007840167  |
| H356  | 12.127609581  | 0.150225075   | 1.022009093  |
| H357  | 14.037175941  | 2.792862029   | 1.700341588  |
| H358  | 11.788109704  | 1.561879103   | 3.414620719  |
| H359  | 6.023075977   | 5.192252373   | 7.004863847  |
| H360  | -12.164928440 | 6.803091445   | 2.167287187  |
| H361  | 9.679884118   | -0.480363154  | 9.491710275  |
| H362  | 7.961799311   | 1.340346998   | 8.301596266  |
| H363  | -12.037934821 | 5.790203663   | -0.676898424 |
| H364  | -10.553033272 | 4.215770539   | 1.515261737  |
| H365  | -11.985594156 | 3.654624736   | 0.634379205  |
| H366  | 3.410609998   | -1.402967775  | -0.527755958 |
| H367  | -8.316497281  | 2.134894871   | -4.473284248 |
| H368  | 0.995123957   | -0.466177234  | 0.508513874  |
| H369  | -0.765223183  | -0.515043651  | -1.430825990 |
| Mo370 | 6.225822115   | -0.160475959  | -0.551603004 |
| N371  | 0.465034493   | -9.138770486  | -3.753479470 |
| N372  | -3.183667056  | -9.054594332  | -2.972880323 |
| N373  | -3.803333376  | -10.076017206 | -0.401955932 |
| N374  | -1.455559060  | -9.561748548  | 1.051335972  |
| N375  | -1.437830579  | -6.697233537  | 1.077478192  |
| N376  | -3.826306645  | -6.266866953  | 2.572053467  |
| N377  | -3.375502657  | -7.668677870  | 5.052237402  |
| N378  | -0.726688680  | -7.047911115  | 6.008313557  |
| N379  | -0.179385836  | -4.341276846  | 5.612355177  |
| N380  | -2.520404206  | -2.486416450  | 5.805220026  |
| N381  | -3.997433085  | -3.802692204  | 7.931268590  |
| N382  | 9.493389757   | -6.459564176  | 7.366510476  |
| N383  | 8.974171391   | -3.994081333  | 6.438709610  |
| N384  | 4.444820797   | 0.003668429   | 4.826998909  |
| N385  | 2.557258880   | -0.133253624  | 6.207667306  |
| N386  | 2.641619793   | 1.415872777   | 4.471125944  |
| N387  | 9.435077842   | -0.674248660  | 7.441975679  |
| N388  | -0.821243047  | -4.717004886  | -5.310720652 |
| N389  | 3.568604300   | -4.046275092  | -3.587077067 |
| N390  | -2.979602588  | -3.305360760  | -4.787752552 |
| N391  | -5.518380516  | -4.414840889  | -4.667230992 |
| N392  | -5.937407856  | -4.841087315  | -1.965990273 |
| N393  | -5.959337398  | -2.398994675  | -0.602837438 |
| N394  | -3.524326393  | 0.541199267   | -2.537013814 |

|      |               |              |               |
|------|---------------|--------------|---------------|
| N395 | -1.779436051  | -0.384780324 | -1.656030193  |
| N396 | -8.375268934  | -1.082236953 | -0.251576207  |
| N397 | -12.093109913 | -0.255749346 | -2.919768715  |
| N398 | -13.834247931 | 0.418514841  | -1.720396679  |
| N399 | 3.732592484   | 6.388269006  | 7.001699908   |
| N400 | -0.812861622  | 9.424373803  | 3.110577722   |
| N401 | -1.857027618  | 9.877728899  | -0.261752856  |
| N402 | -2.800238045  | 7.839064174  | -1.927001863  |
| N403 | -4.527805167  | 4.470931313  | -5.183754714  |
| N404 | -5.196579346  | 6.545777382  | -6.040078525  |
| N405 | -6.757195456  | 5.109106209  | -5.107912269  |
| N406 | -3.604982219  | 5.679058426  | -0.236630676  |
| N407 | -5.514832968  | 6.993168735  | 1.371962579   |
| N408 | -7.993824701  | 7.998691488  | 0.419232262   |
| N409 | -7.077235014  | 7.345035975  | -2.504778606  |
| N410 | -10.385573827 | 6.623454560  | 0.301891734   |
| N411 | 9.229126358   | 2.305214652  | -7.282430850  |
| N412 | 5.916599123   | 2.142427196  | -5.819180379  |
| N413 | 3.162675527   | 3.410537566  | -5.835141086  |
| N414 | 3.166074243   | 6.138696228  | -4.915682289  |
| N415 | 4.212969442   | 0.030729016  | -9.730237025  |
| N416 | 1.426627647   | -0.036444834 | -9.103242266  |
| N417 | 12.001331912  | 1.762854262  | -1.752358587  |
| N418 | 8.073890264   | -0.177417627 | -2.107708905  |
| N419 | 8.978600147   | -0.590099149 | -4.080071634  |
| N420 | 12.079402736  | 1.114303707  | 1.351137083   |
| N421 | -2.034855376  | 2.534165144  | -0.360216520  |
| N422 | -0.931147332  | 2.396579347  | -0.302507671  |
| O423 | -1.422774191  | -8.268324372 | -1.761453071  |
| O424 | -4.471995863  | -7.984780396 | 0.213443587   |
| O425 | -2.649539815  | -9.749057862 | 2.992409292   |
| O426 | -0.392735091  | -6.863876932 | 3.091707276   |
| O427 | -2.880615540  | -4.343006955 | 3.333890901   |
| O428 | -4.584211041  | -6.000009106 | 6.035160672   |
| O429 | -1.465768529  | -7.515513500 | 8.131313265   |
| O430 | 1.804558969   | -4.504103292 | 6.759710414   |
| O431 | -0.966028357  | -1.362715512 | 7.048801097   |
| O432 | -4.056372558  | -1.732554156 | 8.863480960   |
| O433 | -3.575157285  | -4.124037014 | 11.479933547  |
| O434 | 10.843805348  | -3.951805179 | 5.075368558   |
| O435 | 8.460007859   | -2.337180098 | 8.694373342   |
| O436 | 9.359969555   | 2.362455117  | 9.375354766   |
| O437 | -3.139272971  | -3.991948500 | -2.606289898  |
| O438 | 1.961340217   | -4.165158990 | -5.190422159  |
| O439 | -6.458503431  | -2.376378539 | -4.242399273  |
| O440 | -5.211976739  | -0.455699278 | -5.729972456  |
| O441 | -8.054131201  | -5.646075245 | -2.370206814  |
| O442 | -6.001167655  | -3.462926195 | 1.421345604   |
| O443 | -7.438445443  | 0.340110961  | 1.270172610   |
| O444 | -11.007401091 | 0.047167697  | 1.825851444   |
| O445 | 5.791324784   | 4.084582319  | 8.706533381   |
| O446 | -2.195792599  | 4.490361153  | 5.347676822   |
| O447 | -3.115695017  | 8.877221297  | 1.350936954   |
| O448 | -4.723113772  | 9.024598459  | -2.343075484  |
| O449 | -5.031850559  | 5.063488385  | -1.919934221  |
| O450 | -6.496270882  | 4.976733353  | 1.832786220   |
| O451 | -3.168436063  | 5.517959765  | 2.801957772   |
| O452 | -8.369379947  | 9.071064846  | 2.409092972   |
| O453 | -11.479665775 | 8.391852489  | -0.642647835  |
| O454 | -9.271328965  | 6.992990269  | -3.043965067  |
| O455 | -13.711767972 | 5.754515313  | 1.344655203   |
| O456 | -7.757412277  | 2.540116043  | -3.781944892  |
| O457 | 7.090560644   | 0.573670459  | -7.020067540  |
| O458 | 3.129044892   | 2.049658301  | -7.681077301  |
| O459 | 1.680756605   | 6.679196231  | -6.553814779  |
| O460 | 3.906082502   | 9.657585001  | -5.270201625  |
| O461 | 1.389861956   | -2.063856976 | -10.145951785 |
| O462 | 5.469106599   | -3.743032012 | -6.018638698  |
| O463 | 6.410979416   | -1.727015887 | -5.891345588  |
| O464 | -1.388235740  | 2.126256629  | -9.206591197  |
| O465 | 11.372363368  | 3.252665244  | 1.100401208   |
| O466 | 13.753540061  | 3.286022684  | 3.660699095   |
| O467 | 4.397212300   | -4.694363026 | -0.690530020  |

|                                                                                                                                                                                                     |                                                                                                                                                                                                                                                                                                                                                                                                                                                                                                                                                                                                                                                                                                                                                                                                                                                                                                                                                                                                                                                                                                                                                                                                                                                                                                                                                                                                                                                                                                                                                                                                                                                                                                                                                                                                                                                                                                                                                                                                                                                                                                                                                                                                                                                                                                                                                                 |
|-----------------------------------------------------------------------------------------------------------------------------------------------------------------------------------------------------|-----------------------------------------------------------------------------------------------------------------------------------------------------------------------------------------------------------------------------------------------------------------------------------------------------------------------------------------------------------------------------------------------------------------------------------------------------------------------------------------------------------------------------------------------------------------------------------------------------------------------------------------------------------------------------------------------------------------------------------------------------------------------------------------------------------------------------------------------------------------------------------------------------------------------------------------------------------------------------------------------------------------------------------------------------------------------------------------------------------------------------------------------------------------------------------------------------------------------------------------------------------------------------------------------------------------------------------------------------------------------------------------------------------------------------------------------------------------------------------------------------------------------------------------------------------------------------------------------------------------------------------------------------------------------------------------------------------------------------------------------------------------------------------------------------------------------------------------------------------------------------------------------------------------------------------------------------------------------------------------------------------------------------------------------------------------------------------------------------------------------------------------------------------------------------------------------------------------------------------------------------------------------------------------------------------------------------------------------------------------|
|                                                                                                                                                                                                     | O468 5.744562532 -6.107755533 0.371890381<br>O469 11.606551543 -4.100763007 -0.741491308<br>O470 10.162246941 -5.215583234 -2.074274371<br>O471 7.716899040 -0.795398685 1.007790349<br>O472 8.360996732 -2.583865724 2.216439586<br>O473 6.519125180 -2.215413088 -0.836955692<br>O474 10.064247046 0.331200429 4.852663011<br>O475 7.779077283 0.894086778 3.276141457<br>O476 -5.263403923 1.858269048 -4.263512150<br>O477 12.895201908 -2.219621458 1.373543196<br>O478 10.747886901 -1.854711925 3.251203419<br>S479 -0.221569021 6.762683151 -0.004686038<br>S480 1.156737705 3.914260391 -1.943362311<br>S481 4.725550457 -0.023377018 -2.422128210<br>S482 1.187356353 3.491735641 1.693805809<br>S483 1.278777134 0.121410141 -0.689958947<br>S484 4.925622636 3.815850816 -3.062100604<br>S485 4.663051717 -0.437684330 1.273306718<br>S486 3.573945528 5.700690396 0.161563038<br>S487 6.813443703 2.127878850 -0.298133593<br>S488 4.810934208 3.017116762 2.710955551                                                                                                                                                                                                                                                                                                                                                                                                                                                                                                                                                                                                                                                                                                                                                                                                                                                                                                                                                                                                                                                                                                                                                                                                                                                                                                                                                                             |
| C 35(3/2)<br>dissociated<br>Fe( 139) 0.561 -2.498<br>Fe( 140) 0.485 -0.891<br>Fe( 141) 0.523 -2.351<br>Fe( 142) 0.569 2.836<br>Fe( 143) 0.560 2.956<br>Fe( 144) 0.515 2.227<br>Fe( 145) 0.303 0.340 | bm22b6x2n2xd35tb.car_5<br>C1 -1.841389755 -8.122807057 -4.489621634<br>C2 -0.913959671 -8.586100188 -5.617143999<br>C3 -4.166919625 -7.753701075 -3.785477537<br>C4 -4.153697218 -8.473106743 -2.438318748<br>C5 -3.702484695 -10.536563218 -1.206307553<br>C6 -2.562757308 -10.073577190 -0.290203330<br>C7 -0.366210782 -8.995648315 -0.158137614<br>C8 -0.719993751 -7.644601351 0.468468397<br>C9 -1.881551031 -5.515299274 0.235314201<br>C10 -2.889986337 -5.669614670 1.383714963<br>C11 -4.790907811 -6.877494979 2.294607005<br>C12 -4.217857003 -7.504416602 3.572201827<br>C13 -2.870871572 -9.302660455 4.539436339<br>C14 -1.611768562 -8.765774497 5.233460142<br>C15 0.570221647 -7.666305245 4.952772104<br>C16 0.782567199 -6.158676158 5.115813838<br>C17 -0.120854556 -3.896966246 4.654078131<br>C18 -1.237179386 -3.341801707 5.560296893<br>C19 -0.090344275 -3.257011592 3.242189736<br>C20 -0.196403456 -1.730518857 3.316823310<br>C21 1.167741692 -3.688819664 2.481211734<br>C22 -3.662812252 -3.096124129 5.931281225<br>C23 -3.912761841 -3.973388882 7.173825608<br>C24 -4.917916735 -2.965425701 5.035302504<br>C25 -6.153157900 -2.596983219 5.863360058<br>C26 -4.687855365 -1.929971900 3.926251436<br>C27 -4.264741111 -6.193257052 8.089560177<br>C28 -3.268738865 -6.026979156 9.220456955<br>C29 10.358778017 -7.105510474 4.949923933<br>C30 10.092591739 -5.601501561 4.857226699<br>C31 8.503006158 -3.822506626 5.621257721<br>C32 8.770713189 -3.343318333 7.062373094<br>C33 7.008170109 -3.761025364 5.264459637<br>C34 6.397303965 -2.360509548 5.359453851<br>C35 5.007488540 -2.342970707 4.719896192<br>C36 3.192154753 -0.676148637 5.167013860<br>C37 9.813867767 -1.612822353 8.448123352<br>C38 8.990662026 -0.407508344 8.848233808<br>C39 -1.124290268 -3.728142089 -4.732395507<br>C40 -2.499403936 -3.122829684 -4.405972843<br>C41 -0.086792134 -3.076034326 -3.790346456<br>C42 1.294403293 -3.760586089 -3.715080818<br>C43 2.313419802 -3.300602258 -4.758510110<br>C44 -4.095419737 -1.393444438 -5.090827686<br>C45 -5.450762248 -2.102021514 -5.048193466<br>C46 -4.156926122 -0.202752003 -6.071204730<br>C47 -6.694805900 -4.192255777 -5.240969870<br>C48 -6.952514520 -4.573264004 -3.775885400<br>C49 -6.051639014 -4.678551305 -1.490641724<br>C50 -5.987806955 -3.496336043 -0.526601747 |

|      |               |              |              |
|------|---------------|--------------|--------------|
| C51  | -5.907345453  | -1.057209542 | -0.234429161 |
| C52  | -7.290586851  | -0.635150929 | 0.314174430  |
| C53  | -5.372142111  | 0.164286699  | -0.994931662 |
| C54  | -3.937365013  | 0.123662054  | -1.412805789 |
| C55  | -2.829244329  | -0.552731289 | -0.962987947 |
| C56  | -2.155304934  | 0.861249270  | -2.538307504 |
| C57  | -9.681573023  | -0.447017250 | -0.248776074 |
| C58  | -10.211720508 | -0.888626630 | 1.111156610  |
| C59  | -10.599511199 | -1.001326699 | -1.372225856 |
| C60  | -11.861568490 | -0.234681877 | -1.629146891 |
| C61  | -12.947380715 | 0.004238617  | -0.807190887 |
| C62  | -13.261212143 | 0.937799482  | -2.792082901 |
| C63  | 3.892392619   | 3.414684392  | 8.420198597  |
| C64  | 5.370133640   | 3.101332452  | 8.568561160  |
| C65  | 3.374313450   | 2.563571221  | 7.229824239  |
| C66  | 1.899420264   | 2.756825406  | 6.966454585  |
| C67  | 0.930544551   | 1.999631108  | 7.652465713  |
| C68  | 1.448377751   | 3.696391313  | 6.022402517  |
| C69  | -0.436600494  | 2.172984529  | 7.410030825  |
| C70  | 0.087890122   | 3.888959097  | 5.777739344  |
| C71  | -0.855761171  | 3.124032160  | 6.470965690  |
| C72  | -0.688461557  | 8.383231605  | 3.470333676  |
| C73  | -1.976982503  | 8.818797465  | 2.761640521  |
| C74  | -0.386998638  | 6.903923785  | 3.180181839  |
| C75  | -2.959326871  | 10.157134752 | 0.954003934  |
| C76  | -3.577806359  | 9.119802736  | 0.014884787  |
| C77  | -3.284371691  | 6.948079669  | -1.122509786 |
| C78  | -4.064242767  | 5.897541961  | -0.299994126 |
| C79  | -2.092071198  | 6.351728095  | -1.896238446 |
| C80  | -2.382568911  | 5.232051132  | -2.900007301 |
| C81  | -3.088729177  | 5.628319429  | -4.209468127 |
| C82  | -5.491521349  | 6.347257026  | -4.237377812 |
| C83  | -4.351226058  | 4.684954864  | 1.800105695  |
| C84  | -5.584366416  | 5.279902447  | 2.508782414  |
| C85  | -3.467181768  | 4.019718653  | 2.866098060  |
| C86  | -6.419038568  | 7.166596332  | 3.817348585  |
| C87  | -7.686316217  | 7.882794605  | 3.357030645  |
| C88  | -9.107897256  | 8.535550321  | 1.450293974  |
| C89  | -10.428060770 | 7.742594202  | 1.342882938  |
| C90  | -8.725646409  | 9.135065091  | 0.074109303  |
| C91  | -8.379266652  | 8.043035559  | -0.930676283 |
| C92  | -11.499084139 | 5.531350195  | 1.427264977  |
| C93  | -12.533956915 | 5.723827628  | 2.532319665  |
| C94  | -11.037993441 | 4.050140604  | 1.379031169  |
| C95  | -10.158194162 | 3.753647302  | 0.185083627  |
| C96  | -10.729816748 | 3.455293753  | -1.062104008 |
| C97  | -8.758155460  | 3.816075205  | 0.273938259  |
| C98  | -9.935884498  | 3.246792701  | -2.193505618 |
| C99  | -7.947279051  | 3.632985190  | -0.851901354 |
| C100 | -8.550691300  | 3.361043485  | -2.077913208 |
| C101 | 8.308923939   | 3.698708594  | -5.574632084 |
| C102 | 7.051532603   | 2.922747984  | -5.934667985 |
| C103 | 4.636716244   | 2.635242956  | -5.428140849 |
| C104 | 3.574498598   | 3.616527489  | -5.935347384 |
| C105 | 2.197128429   | 5.554213376  | -5.333089856 |
| C106 | 2.370205232   | 6.912438072  | -4.656464331 |
| C107 | 3.254790450   | 8.261250864  | -2.839332626 |
| C108 | 3.916814075   | 9.383555638  | -3.611067842 |
| C109 | 3.565158448   | 0.709040476  | -9.492768808 |
| C110 | 2.044579150   | 0.835421151  | -9.646827215 |
| C111 | 3.892997767   | -0.190525701 | -8.278241233 |
| C112 | 5.357262959   | -0.664469899 | -8.316797431 |
| C113 | 5.759962583   | -1.289035663 | -7.000522114 |
| C114 | -0.004851601  | 1.983081213  | -8.957954943 |
| C115 | -0.362344772  | 3.456009123  | -9.016351726 |
| C116 | -0.757704029  | 1.175627137  | -7.870543778 |
| C117 | -0.145679418  | 1.306040313  | -6.497189320 |
| C118 | -0.410836055  | 2.423713800  | -5.686338424 |
| C119 | 0.764933128   | 0.342288868  | -6.029685219 |
| C120 | 0.237879494   | 2.579039967  | -4.456031545 |
| C121 | 1.415530397   | 0.499238449  | -4.799575611 |
| C122 | 1.160403184   | 1.625210517  | -4.011332109 |
| C123 | 10.916605643  | 1.835175239  | -0.368845259 |

|       |              |               |              |
|-------|--------------|---------------|--------------|
| C124  | 11.452686651 | 1.901233111   | 1.070761432  |
| C125  | 10.109703091 | 0.551227002   | -0.627456763 |
| C126  | 9.402396788  | 0.474399463   | -1.946557284 |
| C127  | 9.970492873  | 0.476433533   | -3.206474159 |
| C128  | 7.793556704  | 0.108003631   | -3.378112626 |
| C129  | 12.628631093 | 0.838930684   | 2.914496728  |
| C130  | 13.525447133 | 2.034610046   | 3.147109105  |
| C131  | 5.242066431  | -4.770112686  | -0.829132031 |
| C132  | 5.869780435  | -3.867826324  | 0.194551243  |
| C133  | 7.003448283  | -2.941619472  | -0.405121422 |
| C134  | 8.069712590  | -3.817041126  | -1.125859664 |
| C135  | 9.292103719  | -2.999840559  | -1.578361346 |
| C136  | 10.456769325 | -3.842360968  | -2.017170629 |
| C137  | 7.712509881  | -2.274757138  | 0.816813326  |
| C138  | 3.573177539  | 2.432899546   | 0.154419675  |
| Fe139 | 5.018893443  | 2.373729060   | -1.212403557 |
| Fe140 | 1.712790750  | 2.307221329   | 0.104699314  |
| Fe141 | 3.225428443  | 3.325062305   | 1.883166534  |
| Fe142 | 3.266328623  | 4.251741135   | -0.598523445 |
| Fe143 | 1.215765242  | 4.777207765   | 1.080275875  |
| Fe144 | 4.945056387  | 1.518427373   | 1.262399575  |
| Fe145 | 3.489076076  | 0.378786859   | -0.527521673 |
| H146  | 0.832716560  | -8.407102718  | -4.580628466 |
| H147  | 0.552953580  | -7.160747478  | -5.596594402 |
| H148  | -3.483803719 | -8.479841431  | -5.676813726 |
| H149  | -1.325191970 | -8.256481273  | -6.583925339 |
| H150  | -0.963881129 | -9.688692422  | -5.625427489 |
| H151  | -4.016620693 | -6.687681983  | -3.563566317 |
| H152  | -3.569944178 | -10.226870495 | -3.331539346 |
| H153  | -5.162075063 | -7.877184028  | -4.234310766 |
| H154  | -3.544140849 | -11.594440024 | -1.456204623 |
| H155  | -1.501745300 | -9.401830528  | -1.914370494 |
| H156  | -4.631690833 | -10.455725290 | -0.627404256 |
| H157  | -1.035989027 | -4.937275557  | 0.629570592  |
| H158  | -1.619337826 | -7.019870331  | -1.282669030 |
| H159  | 0.490042030  | -8.868362762  | -0.834667847 |
| H160  | -5.255712947 | -5.925457481  | 2.581246815  |
| H161  | -3.863796171 | -7.194025911  | 0.380607199  |
| H162  | -0.067109354 | -9.662194664  | 0.659647003  |
| H163  | -2.341978740 | -4.937435814  | -0.578725051 |
| H164  | -3.179273891 | -8.908871334  | 2.461986796  |
| H165  | -5.569874949 | -7.542191925  | 1.897608279  |
| H166  | 1.232608528  | -4.783104570  | 2.392346797  |
| H167  | 1.167336330  | -3.260709992  | 1.467477803  |
| H168  | 2.078549157  | -3.330202010  | 2.986045630  |
| H169  | -0.970795236 | -3.634025952  | 2.697599626  |
| H170  | -2.648781011 | -10.325249106 | 4.202392384  |
| H171  | -3.823419659 | -2.182882957  | 3.294995429  |
| H172  | -3.982209689 | -5.720602412  | 6.033407706  |
| H173  | -6.394587722 | -3.360010055  | 6.615941558  |
| H174  | -0.221119612 | -1.304607021  | 2.302706166  |
| H175  | 0.670315011  | -1.285889569  | 3.825086214  |
| H176  | 3.384254907  | 3.062461186   | 9.338755814  |
| H177  | -5.572384943 | -1.876087122  | 3.274282963  |
| H178  | -7.023969017 | -2.483005281  | 5.201826950  |
| H179  | -4.519473273 | -0.931389469  | 4.362864888  |
| H180  | -5.999518070 | -1.641164270  | 6.387655232  |
| H181  | -5.096090706 | -3.949129328  | 4.564056441  |
| H182  | -3.406107352 | -2.107471626  | 6.339579921  |
| H183  | -2.692668047 | -4.041895121  | 4.261947885  |
| H184  | -1.110068031 | -1.398992473  | 3.832946870  |
| H185  | -2.514129443 | 3.715869076   | 2.406812591  |
| H186  | -3.998507478 | 3.113789116   | 3.201773861  |
| H187  | -2.873451131 | 4.375119944   | 4.693465047  |
| H188  | -2.739932080 | 2.725097103   | 6.703421416  |
| H189  | -0.242665383 | 4.608930879   | 5.029407774  |
| H190  | 2.175572940  | 4.273043721   | 5.445952794  |
| H191  | 1.247214802  | 1.254087792   | 8.387277167  |
| H192  | -0.963956407 | -5.798037803  | 4.119140793  |
| H193  | 1.369134178  | -8.030606947  | 4.289176007  |
| H194  | 0.720578939  | -8.121333551  | 5.940573652  |
| H195  | -0.864897078 | -8.052459706  | 3.432790183  |
| H196  | -3.649352914 | -9.358010791  | 5.310417039  |

|      |               |              |               |
|------|---------------|--------------|---------------|
| H197 | -1.173260614  | 1.559145035  | 7.936585915   |
| H198 | 0.815458061   | -3.659351613 | 5.175651018   |
| H199 | -5.282847625  | -6.054958201 | 8.488245932   |
| H200 | -4.179271198  | -7.230649990 | 7.729627922   |
| H201 | -2.272879920  | -5.630123471 | 8.912214201   |
| H202 | 10.881869960  | -1.346357238 | 8.466703534   |
| H203 | 4.314825739   | -2.971443414 | -5.023713473  |
| H204 | 6.416589130   | -6.166450118 | -0.205149782  |
| H205 | 5.473093405   | -1.420769307 | -9.105818115  |
| H206 | 6.022908045   | 0.180022937  | -8.548355195  |
| H207 | 3.231460669   | -1.070422341 | -8.263624025  |
| H208 | 0.394226784   | 4.088371325  | -9.536707975  |
| H209 | 3.871912179   | 0.164871217  | -10.398395574 |
| H210 | 0.036413950   | -2.020502450 | -4.083683211  |
| H211 | 1.186928142   | -4.853549915 | -3.827737501  |
| H212 | 1.989454758   | 2.398125543  | -8.284339003  |
| H213 | -0.326532893  | 1.584620472  | -9.940134943  |
| H214 | 4.113833164   | 2.522008894  | -8.644025809  |
| H215 | 3.869473469   | -3.451768201 | -3.385861920  |
| H216 | 3.688946465   | 0.371966727  | -7.354285010  |
| H217 | 5.229071346   | 1.894590118  | -9.679461797  |
| H218 | -1.044718755  | -4.343937188 | -6.702804000  |
| H219 | -0.521635672  | -3.081455332 | -2.780223921  |
| H220 | 6.582841041   | 0.431513354  | -6.498254794  |
| H221 | 1.713899669   | -3.603760920 | -2.710573367  |
| H222 | -5.286879445  | -1.274902994 | 0.645586645   |
| H223 | -2.719301236  | -1.309174312 | -0.194977552  |
| H224 | -7.025907959  | -5.164463617 | -1.341589881  |
| H225 | -5.013166585  | -4.030260379 | -3.236277638  |
| H226 | -8.191329253  | -1.616945060 | -1.245149040  |
| H227 | -13.165714593 | -0.271586955 | 0.219065295   |
| H228 | -9.901197307  | -1.924411589 | 1.399622029   |
| H229 | -10.811094272 | -2.064210024 | -1.165178681  |
| H230 | -9.656177178  | 0.652942617  | -0.280100549  |
| H231 | -13.753986376 | 1.495845036  | -3.583740433  |
| H232 | -5.517668746  | 1.037064943  | -0.337422393  |
| H233 | -6.003670828  | 0.336148830  | -1.881742987  |
| H234 | -14.726118057 | 1.103887157  | -1.252951013  |
| H235 | -10.022245312 | -0.970364421 | -2.308840578  |
| H236 | -5.930194781  | -2.150523915 | -2.092761282  |
| H237 | -5.281294090  | -5.400523565 | -1.184637525  |
| H238 | -7.587051665  | -3.657106644 | -5.591796921  |
| H239 | -1.515554896  | 1.422242452  | -3.214475885  |
| H240 | -6.604723911  | -5.114410250 | -5.828387232  |
| H241 | 3.872166077   | 5.378949454  | 9.006031679   |
| H242 | 2.765178021   | 5.026778603  | 7.856426296   |
| H243 | -2.678552930  | 5.947599844  | 1.239966299   |
| H244 | -4.739176887  | 3.891041292  | 1.146342661   |
| H245 | -4.650090429  | 7.098983784  | 2.659767856   |
| H246 | -4.100588512  | 1.672673834  | -2.909444776  |
| H247 | -5.234429580  | 2.060236404  | -4.605747987  |
| H248 | -6.151659046  | 2.692452488  | -3.469397442  |
| H249 | -3.213273821  | 0.357444832  | -6.020304527  |
| H250 | -4.292374770  | -0.571599221 | -7.101550462  |
| H251 | -7.884790289  | 9.828534278  | 0.222985762   |
| H252 | -9.590058357  | 9.699315929  | -0.297709232  |
| H253 | -6.306791567  | 8.289850487  | -0.628010346  |
| H254 | -6.796935791  | 6.877268648  | -1.515880238  |
| H255 | -5.959880612  | 8.311934624  | -4.569419501  |
| H256 | -2.700492986  | 5.022418630  | -5.041459197  |
| H257 | -10.397321395 | 2.991843664  | -3.150444980  |
| H258 | -8.269828177  | 4.002587973  | 1.234108259   |
| H259 | -7.027116657  | 5.069442802  | -3.688252095  |
| H260 | -1.361377712  | 5.961569866  | -1.170880759  |
| H261 | -1.911017530  | 7.922221739  | 0.188932421   |
| H262 | -2.936701179  | 4.415209230  | -2.415579998  |
| H263 | -4.653468467  | -3.810678617 | -5.807426669  |
| H264 | -2.645586174  | 11.018329721 | 0.347437390   |
| H265 | -2.324509109  | -2.167948721 | -6.156811728  |
| H266 | -1.597262365  | 7.186242554  | -2.420657502  |
| H267 | -6.864104197  | 3.745781273  | -0.776210510  |
| H268 | -5.959501825  | 0.129337902  | -5.387643534  |
| H269 | -3.764109553  | 10.489741595 | 1.624294628   |

|      |               |              |              |
|------|---------------|--------------|--------------|
| H270 | -4.347767195  | 7.879342437  | -4.990407594 |
| H271 | -7.524468305  | 6.653488370  | -4.209220398 |
| H272 | 0.219744197   | -3.353663825 | -6.241464323 |
| H273 | -1.202661447  | -4.796381816 | -4.453506923 |
| H274 | -11.814762539 | 3.370664850  | -1.155298098 |
| H275 | -3.984866217  | -0.983694268 | -4.073691695 |
| H276 | -4.022575088  | 7.363775076  | -1.821484347 |
| H277 | -2.866238025  | 6.672524188  | -4.462977492 |
| H278 | -1.403692973  | 4.811701718  | -3.169365792 |
| H279 | -4.841344249  | 4.432850933  | -4.046692887 |
| H280 | -6.748705435  | 6.358631492  | 4.487694058  |
| H281 | -7.304700619  | 7.367724095  | 1.408432143  |
| H282 | -9.325716285  | 9.366796817  | 2.138096437  |
| H283 | -5.848064263  | 7.887799863  | 4.417249116  |
| H284 | -9.457509903  | 6.026944978  | 1.881654975  |
| H285 | 8.041944188   | 4.731900856  | -5.305908249 |
| H286 | 8.701598042   | 3.223551713  | -4.651494999 |
| H287 | 10.243746051  | 2.699766586  | -0.466007991 |
| H288 | 10.173527627  | 3.974852691  | -6.350470915 |
| H289 | 9.341346694   | 2.743213874  | -7.043726395 |
| H290 | 0.580983533   | 6.662697867  | 3.638064086  |
| H291 | -1.634942376  | 8.116429203  | 5.255377778  |
| H292 | -0.887453472  | 9.981488041  | 1.460354049  |
| H293 | -1.173424546  | 6.288281168  | 3.640594985  |
| H294 | -0.891391056  | 9.567005123  | 5.135418495  |
| H295 | 3.858527556   | 8.080745844  | -1.935685011 |
| H296 | 0.151023917   | 8.992242843  | 3.099573609  |
| H297 | 6.460394025   | -4.460650402 | 5.917782446  |
| H298 | 9.071559770   | -3.209974383 | 4.910795778  |
| H299 | 3.674713331   | 6.196754714  | -3.186872592 |
| H300 | 1.867520433   | 0.867315895  | 5.263047020  |
| H301 | 2.216707426   | 5.722101421  | -6.417735986 |
| H302 | 2.137739623   | -0.246981420 | -4.461057215 |
| H303 | 1.174881414   | 5.218800752  | -5.088019781 |
| H304 | 4.327283919   | -3.035624511 | 5.233365390  |
| H305 | 3.499226562   | 4.383987210  | -4.043272383 |
| H306 | 5.079543692   | -2.685147444 | 3.674547927  |
| H307 | 6.913930041   | -4.134670974 | 4.232375045  |
| H308 | 7.028308802   | -1.629698866 | 4.830108951  |
| H309 | 6.324301518   | -2.034592917 | 6.409628753  |
| H310 | -0.755199836  | 0.120724355  | -8.180573897 |
| H311 | 8.501543725   | -5.944124723 | 6.012843280  |
| H312 | 10.174199068  | -7.512419753 | 3.943861716  |
| H313 | 1.676690204   | 1.771895880  | -3.060081703 |
| H314 | 9.960905102   | -7.856545734 | 6.827053864  |
| H315 | 9.318947235   | -8.754103475 | 5.616052575  |
| H316 | 4.808131546   | -0.338703833 | 4.027936860  |
| H317 | 0.049755889   | 3.450436519  | -3.825437879 |
| H318 | 0.972120677   | -0.543904010 | -6.633764557 |
| H319 | 12.193809922  | -2.525806297 | 1.581182694  |
| H320 | 10.793466100  | -0.314309552 | -0.555697732 |
| H321 | 9.872614110   | -2.568303596 | 2.354348793  |
| H322 | 12.533287470  | -2.865360573 | 0.114887271  |
| H323 | 4.552709865   | 9.056130959  | -4.467910475 |
| H324 | 7.764462372   | -0.228484428 | 2.507749816  |
| H325 | 6.283697990   | -4.448603662 | 1.032256526  |
| H326 | 6.004234724   | 3.962100244  | -4.508593851 |
| H327 | 8.398313257   | -4.605279582 | -0.430526604 |
| H328 | 9.020955964   | 0.154223307  | -5.099612067 |
| H329 | 6.830005618   | -0.097945169 | -3.827758545 |
| H330 | 11.438707933  | -7.217193341 | 5.142577988  |
| H331 | 3.112015250   | 1.048540829  | 4.057341808  |
| H332 | 9.293451337   | -0.249058233 | 4.397478848  |
| H333 | 7.335680547   | 1.052850577  | 3.277630673  |
| H334 | 9.693026916   | -1.642182973 | 6.295687318  |
| H335 | 3.091163362   | -2.096602459 | 6.656727971  |
| H336 | 10.960908017  | -5.174929421 | -3.262071157 |
| H337 | 8.993599671   | -2.346245233 | -2.411381860 |
| H338 | 9.654597085   | -2.364544995 | -0.762395130 |
| H339 | 7.606602177   | -4.295829959 | -2.001579862 |
| H340 | 4.335992336   | 2.196438655  | -4.463045434 |
| H341 | -1.114832037  | 3.183097271  | -6.034998965 |
| H342 | -1.801482381  | 1.525790585  | -7.873510694 |



|       |               |              |              |
|-------|---------------|--------------|--------------|
| H343  | 5.099177247   | -3.184036926 | 0.574553473  |
| H344  | 10.418725644  | -1.275339829 | 4.105477375  |
| H345  | 10.818626657  | -3.338256163 | 3.324961044  |
| H346  | 1.639527738   | -1.197594000 | 6.408326426  |
| H347  | 10.996825722  | 0.616525215  | -3.526208466 |
| H348  | 9.368610309   | 0.426495915  | 0.171869520  |
| H349  | 4.742352641   | 1.837571195  | -6.165996249 |
| H350  | 2.256387136   | 8.589829617  | -2.511452605 |
| H351  | 3.580513091   | 1.509056217  | 7.470748722  |
| H352  | 3.951585159   | 2.823945715  | 6.328102470  |
| H353  | 12.451589553  | 2.916643284  | -1.194649965 |
| H354  | 12.730505859  | 1.305483724  | -1.196593967 |
| H355  | 13.247053401  | -0.061279817 | 3.056045190  |
| H356  | 12.162090422  | -0.072072419 | 1.044477280  |
| H357  | 14.030148910  | 2.425975455  | 2.232217168  |
| H358  | 11.829722572  | 0.818756922  | 3.673075334  |
| H359  | 6.037795911   | 3.726744607  | 7.925612140  |
| H360  | -12.164469507 | 6.244304389  | 3.447451919  |
| H361  | 9.641222249   | -2.390799546 | 9.212169634  |
| H362  | 7.991833410   | -0.325971414 | 8.355627902  |
| H363  | -11.995355002 | 5.785462533  | 0.476770008  |
| H364  | -10.511303717 | 3.806698778  | 2.315519633  |
| H365  | -11.944648944 | 3.428524067  | 1.348702355  |
| H366  | 3.243126585   | -1.020127873 | -1.023014878 |
| H367  | -8.274457629  | 2.970327178  | -3.968250074 |
| H368  | 0.965883839   | -0.437034359 | 0.729300258  |
| H369  | -0.736069404  | -0.239980295 | -1.445115244 |
| Mo370 | 6.158709920   | -0.037504605 | -0.563786477 |
| N371  | 0.476080746   | -8.176866037 | -5.511679768 |
| N372  | -3.176542783  | -8.232560295 | -4.739220130 |
| N373  | -3.802809318  | -9.782573157 | -2.446647617 |
| N374  | -1.460251595  | -9.586576007 | -0.912464725 |
| N375  | -1.427331582  | -6.785559108 | -0.308391182 |
| N376  | -3.803367239  | -6.660766898 | 1.251043637  |
| N377  | -3.363320135  | -8.544882665 | 3.400315827  |
| N378  | -0.722615658  | -8.095981527 | 4.446231543  |
| N379  | -0.183648845  | -5.355144405 | 4.600084483  |
| N380  | -2.517834412  | -3.574467615 | 5.154533258  |
| N381  | -3.978004246  | -5.314170850 | 6.971184816  |
| N382  | 9.497532790   | -7.795450478 | 5.918130431  |
| N383  | 8.978973054   | -5.196477597 | 5.496027490  |
| N384  | 4.404960078   | -1.004390068 | 4.696609320  |
| N385  | 2.561671245   | -1.458799110 | 6.071808930  |
| N386  | 2.570283915   | 0.410546708  | 4.683992792  |
| N387  | 9.440465190   | -2.167776145 | 7.161020467  |
| N388  | -0.799430889  | -3.521047782 | -6.148011210 |
| N389  | 3.594241769   | -3.243380395 | -4.347834307 |
| N390  | -2.967136064  | -2.263944367 | -5.353116541 |
| N391  | -5.508843286  | -3.382742576 | -5.458816257 |
| N392  | -5.927181172  | -4.359573730 | -2.901433295 |
| N393  | -5.948958404  | -2.243445308 | -1.078038454 |
| N394  | -3.483797331  | 0.990208922  | -2.397777933 |
| N395  | -1.746940750  | -0.082176397 | -1.682072033 |
| N396  | -8.346994113  | -0.992546814 | -0.458084552 |
| N397  | -12.071064345 | 0.355806495  | -2.866084033 |
| N398  | -13.823490333 | 0.753130160  | -1.562412814 |
| N399  | 3.730319216   | 4.844503911  | 8.145455302  |
| N400  | -0.776627898  | 8.570865540  | 4.926561728  |
| N401  | -1.824666116  | 9.693922855  | 1.728084220  |
| N402  | -2.804663856  | 8.059488805  | -0.306410279 |
| N403  | -4.542202074  | 5.414057617  | -4.183719825 |
| N404  | -5.201497891  | 7.640654184  | -4.497060496 |
| N405  | -6.769883061  | 6.018346845  | -3.966237289 |
| N406  | -3.629681719  | 5.642518155  | 0.963336219  |
| N407  | -5.542900418  | 6.612876610  | 2.793905819  |
| N408  | -7.998433998  | 7.786386454  | 2.031120099  |
| N409  | -7.067534112  | 7.678861930  | -0.948185415 |
| N410  | -10.357903967 | 6.414982062  | 1.609922653  |
| N411  | 9.250996901   | 3.702686577  | -6.696780524 |
| N412  | 5.932801254   | 3.285837251  | -5.276259370 |
| N413  | 3.165241776   | 4.518506716  | -5.018996011 |
| N414  | 3.195620087   | 7.015715214  | -3.586170387 |
| N415  | 4.225449180   | 2.019341172  | -9.532933886 |

|      |               |               |               |
|------|---------------|---------------|---------------|
| N416 | 1.438878663   | 1.824532002   | -8.931218651  |
| N417 | 12.002680105  | 2.009968441   | -1.353580716  |
| N418 | 8.032388402   | 0.248730794   | -2.077250771  |
| N419 | 8.939827492   | 0.243655130   | -4.090838565  |
| N420 | 12.103500300  | 0.807818331   | 1.558040771   |
| N421 | -2.247820843  | 2.877961261   | -0.183000055  |
| N422 | -1.919214911  | 2.117160900   | 0.556117280   |
| O423 | -1.414147018  | -7.729629726  | -3.387720473  |
| O424 | -4.464861039  | -7.870139416  | -1.398190611  |
| O425 | -2.660204532  | -10.177118446 | 0.943085231   |
| O426 | -0.379647810  | -7.359627649  | 1.627142547   |
| O427 | -2.864957343  | -4.914287096  | 2.368617012   |
| O428 | -4.558656830  | -7.093644047  | 4.694723333   |
| O429 | -1.431576096  | -8.990729120  | 6.437892031   |
| O430 | 1.811281017   | -5.746345888  | 5.671764638   |
| O431 | -0.963582366  | -2.717023671  | 6.596788523   |
| O432 | -4.049760832  | -3.480859173  | 8.305525367   |
| O433 | -3.503469123  | -6.354611448  | 10.373612630  |
| O434 | 10.874593881  | -4.875614754  | 4.206410089   |
| O435 | 8.393428625   | -4.020776815  | 8.034500472   |
| O436 | 9.367781703   | 0.419937405   | 9.662279758   |
| O437 | -3.123276264  | -3.387759045  | -3.358660178  |
| O438 | 1.976931539   | -3.013868202  | -5.929957498  |
| O439 | -6.443852311  | -1.479750708  | -4.607471329  |
| O440 | -5.220869658  | 0.696959170   | -5.723664726  |
| O441 | -8.048929978  | -5.048870554  | -3.458254565  |
| O442 | -5.994199238  | -3.688721515  | 0.692358431   |
| O443 | -7.390573336  | 0.069753538   | 1.322240526   |
| O444 | -10.950375810 | -0.223094478  | 1.815031486   |
| O445 | 5.820433699   | 2.234138358   | 9.303832169   |
| O446 | -2.189124507  | 3.338330140   | 6.182926813   |
| O447 | -3.100397336  | 8.411996285   | 3.110733770   |
| O448 | -4.727860437  | 9.311500927   | -0.429775709  |
| O449 | -5.060685859  | 5.343337075   | -0.799321055  |
| O450 | -6.528476979  | 4.544527546   | 2.830598907   |
| O451 | -3.242442486  | 4.911317724   | 3.960497227   |
| O452 | -8.389552176  | 8.483508568   | 4.180428453   |
| O453 | -11.480124192 | 8.317608606   | 1.030195557   |
| O454 | -9.247588379  | 7.461112816   | -1.599890625  |
| O455 | -13.681162866 | 5.318304781   | 2.444228818   |
| O456 | -7.718669276  | 3.229130677   | -3.207400229  |
| O457 | 7.096099077   | 1.986009190   | -6.772377321  |
| O458 | 3.149911523   | 3.580045507   | -7.111400413  |
| O459 | 1.713377636   | 7.878774280   | -5.082156354  |
| O460 | 3.804722973   | 10.561256834  | -3.308879681  |
| O461 | 1.404019288   | 0.053825552   | -10.369848258 |
| O462 | 5.480943823   | -2.440144891  | -6.679485381  |
| O463 | 6.424284939   | -0.496046336  | -6.137073285  |
| O464 | -1.399150598  | 3.938186668   | -8.584810240  |
| O465 | 11.366529120  | 2.941261559   | 1.749871877   |
| O466 | 13.754598319  | 2.506000110   | 4.251725065   |
| O467 | 4.355062148   | -4.460742045  | -1.613283805  |
| O468 | 5.727421746   | -6.052668173  | -0.887461144  |
| O469 | 11.583072256  | -3.818581811  | -1.525941786  |
| O470 | 10.147208082  | -4.669449247  | -3.051041887  |
| O471 | 7.626849178   | -0.987758892  | 0.866066143   |
| O472 | 8.340421310   | -2.981405590  | 1.641614058   |
| O473 | 6.456521960   | -1.999068180  | -1.253898242  |
| O474 | 10.085611780  | -0.668861540  | 4.818686060   |
| O475 | 7.780992615   | 0.193553433   | 3.405961192   |
| O476 | -5.223128094  | 2.655641352   | -3.807637612  |
| O477 | 12.924137817  | -2.457651519  | 0.914980845   |
| O478 | 10.762448028  | -2.495043066  | 2.804301675   |
| S479 | -0.324192881  | 6.502806820   | 1.372872427   |
| S480 | 1.023942633   | 4.023986471   | -1.116949600  |
| S481 | 4.655402639   | 0.485050885   | -2.383766310  |
| S482 | 1.050623062   | 2.809671108   | 2.175340306   |
| S483 | 1.211260969   | 0.212650399   | -0.450582238  |
| S484 | 4.852419034   | 4.392411872   | -2.198876753  |
| S485 | 4.521877741   | -0.662907382  | 1.100087462   |
| S486 | 3.375171776   | 5.486659604   | 1.350365504   |
| S487 | 6.804269081   | 2.138542005   | 0.173418047   |
| S488 | 4.685758329   | 2.400243045   | 3.284799979   |

Structure D 47(1)

| D 47(1)<br>associated       | bm2cnx2b6x2hn2n2xd1td.car_3 |               |               |               |
|-----------------------------|-----------------------------|---------------|---------------|---------------|
| Fe( 139) 0.546 2.404        | C1                          | -2.339904736  | -1.801171039  | -8.960994760  |
| <b>Fe( 140) 0.277 0.161</b> | C2                          | -1.283774871  | -1.555374425  | -10.042926180 |
| Fe( 141) 0.521 1.789        | C3                          | -4.685511427  | -1.497449152  | -8.300708847  |
| Fe( 142) 0.543 -2.624       | C4                          | -5.028482854  | -2.913289193  | -7.840370661  |
| Fe( 143) 0.605 3.126        | C5                          | -5.130932691  | -5.290769015  | -8.387320444  |
| Fe( 144) 0.487 -2.198       | C6                          | -4.143475538  | -5.853851823  | -7.361174740  |
| Fe( 145) 0.353 -1.066       | C7                          | -1.873507343  | -5.748703412  | -6.446192588  |
|                             | C8                          | -2.122611476  | -5.109870243  | -5.076445961  |
|                             | C9                          | -2.802207939  | -3.124367718  | -3.830986679  |
|                             | C10                         | -4.022520232  | -3.709657166  | -3.104256749  |
|                             | C11                         | -6.236492475  | -4.700216155  | -3.278138444  |
|                             | C12                         | -6.044178260  | -6.146793228  | -2.800949032  |
|                             | C13                         | -5.378820482  | -8.421699591  | -3.423995441  |
|                             | C14                         | -4.183682505  | -8.931036168  | -2.610926774  |
|                             | C15                         | -1.794140698  | -8.687859399  | -2.099129050  |
|                             | C16                         | -1.352768816  | -7.895379247  | -0.866050970  |
|                             | C17                         | -1.720493747  | -5.829016681  | 0.456385615   |
|                             | C18                         | -2.836144389  | -5.754027485  | 1.514428673   |
|                             | C19                         | -1.312573130  | -4.444830422  | -0.116537185  |
|                             | C20                         | -1.115825403  | -3.390895901  | 0.977724377   |
|                             | C21                         | -0.052074208  | -4.567882603  | -0.980910077  |
|                             | C22                         | -5.196482047  | -5.234500049  | 2.004840622   |
|                             | C23                         | -5.836777696  | -6.614435550  | 2.253866303   |
|                             | C24                         | -6.220222485  | -4.179095079  | 1.521560112   |
|                             | C25                         | -7.468877497  | -4.176742647  | 2.411019380   |
|                             | C26                         | -5.584143085  | -2.782175919  | 1.487106088   |
|                             | C27                         | -6.811717684  | -8.636598061  | 1.333154310   |
|                             | C28                         | -6.031507148  | -9.556242093  | 2.254860031   |
|                             | C29                         | 7.459133277   | -11.001880539 | -1.893736926  |
|                             | C30                         | 7.517009784   | -9.880046172  | -0.855554812  |
|                             | C31                         | 6.222070493   | -8.856945239  | 1.025926998   |
|                             | C32                         | 6.263407079   | -9.640204058  | 2.352770511   |
|                             | C33                         | 4.879251043   | -8.125112387  | 0.841603901   |
|                             | C34                         | 4.590247249   | -7.082999246  | 1.925889324   |
|                             | C35                         | 3.400885772   | -6.203909159  | 1.539053692   |
|                             | C36                         | 1.999971373   | -4.794629205  | 3.064070524   |
|                             | C37                         | 7.234351013   | -9.754805141  | 4.598557755   |
|                             | C38                         | 6.555746403   | -9.006104537  | 5.725867828   |
|                             | C39                         | -0.982894422  | 1.072907797   | -5.831098666  |
|                             | C40                         | -2.222926176  | 1.669058902   | -5.145466254  |
|                             | C41                         | 0.006428662   | 0.648228929   | -4.719364534  |
|                             | C42                         | 1.186565261   | -0.238773766  | -5.168861558  |
|                             | C43                         | 2.439718780   | 0.521575815   | -5.602435868  |
|                             | C44                         | -3.293574578  | 3.777452830   | -4.491709855  |
|                             | C45                         | -4.716099619  | 3.725804386   | -5.065500192  |
|                             | C46                         | -2.855706891  | 5.237510760   | -4.257484498  |
|                             | C47                         | -6.216682954  | 2.669744468   | -6.688065155  |
|                             | C48                         | -6.811748720  | 1.427757103   | -6.006188025  |
|                             | C49                         | -6.405146222  | -0.492457042  | -4.521462098  |
|                             | C50                         | -6.447159794  | -0.383314334  | -2.996685276  |
|                             | C51                         | -5.825905065  | 0.831111541   | -0.959880149  |
|                             | C52                         | -7.245452301  | 1.117060269   | -0.407418378  |
|                             | C53                         | -4.975616174  | 2.022897669   | -0.491958907  |
|                             | C54                         | -3.503829065  | 1.994411112   | -0.754633443  |
|                             | C55                         | -2.573743487  | 0.997365887   | -0.924752356  |
|                             | C56                         | -1.481118393  | 2.929158312   | -0.890582518  |
|                             | C57                         | -9.260096841  | 2.509239897   | -0.787270636  |
|                             | C58                         | -10.285039594 | 1.419786015   | -0.479694127  |
|                             | C59                         | -9.752818888  | 3.407379241   | -1.945930022  |
|                             | C60                         | -10.763604443 | 4.463082228   | -1.605638474  |
|                             | C61                         | -11.872578446 | 4.435579436   | -0.782415131  |
|                             | C62                         | -11.671899533 | 6.424164648   | -1.740499184  |
|                             | C63                         | 2.365140022   | -4.616627941  | 8.278937187   |
|                             | C64                         | 3.662959817   | -5.397922698  | 8.197738761   |
|                             | C65                         | 1.939221485   | -4.299409575  | 6.822096944   |
|                             | C66                         | 0.626767922   | -3.555726959  | 6.743987336   |
|                             | C67                         | -0.602179330  | -4.236103188  | 6.658593929   |
|                             | C68                         | 0.598146810   | -2.149207805  | 6.772471187   |
|                             | C69                         | -1.815206006  | -3.541376510  | 6.602087309   |

|       |               |              |              |
|-------|---------------|--------------|--------------|
| C70   | -0.603561179  | -1.442284367 | 6.727481200  |
| C71   | -1.810496493  | -2.140210983 | 6.640191653  |
| C72   | 0.170408425   | 3.529565488  | 8.448883358  |
| C73   | -0.873081213  | 4.632586709  | 8.225977197  |
| C74   | 0.289646980   | 2.653677818  | 7.192419224  |
| C75   | -1.256128886  | 7.042834093  | 7.909982733  |
| C76   | -1.800318221  | 7.189945958  | 6.487931834  |
| C77   | -1.619165999  | 6.452272606  | 4.133729888  |
| C78   | -2.668141504  | 5.351392835  | 3.861944798  |
| C79   | -0.376697416  | 6.343434550  | 3.228926697  |
| C80   | -0.588239118  | 6.368864757  | 1.712045871  |
| C81   | -1.066732995  | 7.694565214  | 1.096134823  |
| C82   | -3.291550424  | 8.777312147  | 1.389940481  |
| C83   | -3.487403878  | 3.103242474  | 4.343120984  |
| C84   | -4.734219448  | 3.227422281  | 5.238250945  |
| C85   | -2.878751137  | 1.710803246  | 4.564793042  |
| C86   | -5.532380814  | 3.717967585  | 7.494232375  |
| C87   | -6.536770963  | 4.835715553  | 7.756308445  |
| C88   | -7.357845843  | 7.070875483  | 7.143865534  |
| C89   | -8.785691300  | 6.981236424  | 6.563684741  |
| C90   | -6.647020979  | 8.362693817  | 6.686018177  |
| C91   | -6.443220018  | 8.406930454  | 5.176402148  |
| C92   | -10.276594363 | 5.834959883  | 4.981859931  |
| C93   | -11.402094948 | 5.494793636  | 5.952970130  |
| C94   | -10.158485305 | 4.729655169  | 3.899537341  |
| C95   | -9.146746310  | 5.090407597  | 2.835721085  |
| C96   | -9.504172760  | 5.939122391  | 1.775779149  |
| C97   | -7.814134853  | 4.652082428  | 2.912831805  |
| C98   | -8.560983478  | 6.365798730  | 0.838022405  |
| C99   | -6.850389827  | 5.086378773  | 1.996047463  |
| C100  | -7.236328581  | 5.947444528  | 0.970930624  |
| C101  | 9.732443308   | 4.268682596  | -1.047030105 |
| C102  | 8.469657950   | 4.288154612  | -1.890197251 |
| C103  | 5.988045251   | 4.355841108  | -1.815656766 |
| C104  | 5.175904204   | 5.614145274  | -1.490106859 |
| C105  | 3.915743719   | 6.790674696  | 0.249129851  |
| C106  | 4.038573045   | 7.173223025  | 1.721805052  |
| C107  | 4.883930931   | 6.672751146  | 3.966505333  |
| C108  | 6.197540614   | 7.305404396  | 4.376191032  |
| C109  | 5.477405225   | 6.077271478  | -6.012860758 |
| C110  | 4.055629727   | 6.645513882  | -6.079046829 |
| C111  | 5.396540762   | 4.546428706  | -5.810296082 |
| C112  | 6.746540702   | 3.868502347  | -6.104216949 |
| C113  | 6.731515899   | 2.433903463  | -5.625013533 |
| C114  | 2.083581604   | 7.396178966  | -4.844417850 |
| C115  | 1.953215876   | 8.516517434  | -3.831777231 |
| C116  | 1.012507919   | 6.284401377  | -4.729117043 |
| C117  | 1.317010878   | 5.310633769  | -3.621542609 |
| C118  | 0.983482728   | 5.602185939  | -2.288919190 |
| C119  | 2.050198716   | 4.141979237  | -3.893159516 |
| C120  | 1.419886185   | 4.766923635  | -1.254531227 |
| C121  | 2.484319921   | 3.308122953  | -2.858009260 |
| C122  | 2.187888325   | 3.632834515  | -1.532353633 |
| C123  | 10.871298007  | -1.638942071 | 1.272014323  |
| C124  | 11.076090896  | -2.791493329 | 2.268738864  |
| C125  | 10.082880904  | -2.063864922 | 0.023717797  |
| C126  | 9.671032560   | -0.953030565 | -0.892836315 |
| C127  | 10.481005947  | -0.197856003 | -1.716811508 |
| C128  | 8.362651828   | 0.337344755  | -2.075183851 |
| C129  | 11.610717099  | -5.128851384 | 2.684281735  |
| C130  | 12.682693120  | -4.812204993 | 3.703147465  |
| C131  | 4.320127218   | -3.846177911 | -3.866863445 |
| C132  | 4.933175294   | -4.236046989 | -2.551759660 |
| C133  | 6.341807328   | -3.563987543 | -2.293083753 |
| C134  | 7.324372794   | -3.954949780 | -3.433326497 |
| C135  | 8.763888651   | -3.493321217 | -3.148067296 |
| C136  | 9.772582859   | -4.062906038 | -4.104147574 |
| C137  | 6.889252530   | -4.194911433 | -0.975781345 |
| C138  | 3.891252672   | 0.524700163  | 1.905034922  |
| Fe139 | 5.563045740   | 1.079078781  | 0.969257182  |
| Fe140 | 1.666602140   | 0.495216450  | 1.960942710  |
| Fe141 | 3.733985249   | 0.218297851  | 3.812338792  |
| Fe142 | 3.983539465   | 2.392523272  | 2.504451530  |

|       |              |              |               |
|-------|--------------|--------------|---------------|
| Fe143 | 1.954307278  | 2.325989879  | 4.219182829   |
| Fe144 | 4.986177604  | -1.145353939 | 2.108314526   |
| Fe145 | 3.671334261  | -0.437286020 | -0.011417558  |
| H146  | 0.235597577  | -2.599472131 | -9.169522315  |
| H147  | 0.332832002  | -0.988206504 | -8.927839939  |
| H148  | -3.767198030 | -0.899194767 | -10.135975632 |
| H149  | -1.438706712 | -0.552288579 | -10.471193686 |
| H150  | -1.490197103 | -2.266412621 | -10.862131854 |
| H151  | -4.430956252 | -0.931205412 | -7.393930783  |
| H152  | -4.537310948 | -3.677109175 | -9.682523607  |
| H153  | -5.584043825 | -1.049283407 | -8.746603009  |
| H154  | -5.084586634 | -5.903285134 | -9.297269806  |
| H155  | -2.673434097 | -4.601244777 | -8.057688569  |
| H156  | -6.134172970 | -5.394141658 | -7.953723123  |
| H157  | -1.958679684 | -3.188388822 | -3.130427383  |
| H158  | -2.492595779 | -3.275343759 | -5.957246715  |
| H159  | -0.887377452 | -5.439944256 | -6.818046631  |
| H160  | -6.541858668 | -4.105149286 | -2.408540797  |
| H161  | -5.031700619 | -3.947060984 | -4.896386188  |
| H162  | -1.865049459 | -6.835254643 | -6.296510234  |
| H163  | -2.980425931 | -2.062317304 | -4.054253042  |
| H164  | -5.165779536 | -6.657089901 | -4.604503142  |
| H165  | -7.050054374 | -4.682114467 | -4.016189394  |
| H166  | -0.193096063 | -5.275894275 | -1.809595434  |
| H167  | 0.213791150  | -3.590441216 | -1.412526769  |
| H168  | 0.806229181  | -4.904253065 | -0.378221448  |
| H169  | -2.140450388 | -4.108911686 | -0.761726935  |
| H170  | -5.360722615 | -8.938941985 | -4.394794382  |
| H171  | -4.712547250 | -2.738943742 | 0.818351441   |
| H172  | -6.052291729 | -6.981882493 | 0.212850807   |
| H173  | -7.994668296 | -5.142999697 | 2.394628657   |
| H174  | -0.940978353 | -2.404859560 | 0.522215449   |
| H175  | -0.235040331 | -3.606848139 | 1.598397589   |
| H176  | 1.600781244  | -5.284731999 | 8.720116583   |
| H177  | -6.320591103 | -2.043161659 | 1.137872312   |
| H178  | -8.169984325 | -3.401063178 | 2.070464129   |
| H179  | -5.260170605 | -2.484848589 | 2.498153557   |
| H180  | -7.199498549 | -3.956222481 | 3.456618977   |
| H181  | -6.526491583 | -4.452572584 | 0.494967362   |
| H182  | -4.804659628 | -4.927464714 | 2.985859520   |
| H183  | -4.172038444 | -4.974800895 | 0.133037787   |
| H184  | -1.990460576 | -3.297233127 | 1.639449549   |
| H185  | -1.908752871 | 1.662725856  | 4.043285099   |
| H186  | -3.556922548 | 0.976002999  | 4.105109067   |
| H187  | -2.839615282 | 0.491214762  | 6.104381586   |
| H188  | -3.738705139 | -1.986011861 | 6.474466312   |
| H189  | -0.602180850 | -0.351619119 | 6.723506211   |
| H190  | 1.535724145  | -1.590031353 | 6.795956139   |
| H191  | -0.616308068 | -5.328997246 | 6.630067810   |
| H192  | -2.785214999 | -6.508550522 | -1.276864426  |
| H193  | -0.962390672 | -8.653500367 | -2.817859126  |
| H194  | -1.929576269 | -9.731887425 | -1.787194878  |
| H195  | -2.945358808 | -7.455580258 | -3.397831486  |
| H196  | -6.280986559 | -8.735845417 | -2.884119513  |
| H197  | -2.759463845 | -4.086295634 | 6.522203028   |
| H198  | -0.864264497 | -6.275293949 | 0.978041486   |
| H199  | -7.841301123 | -8.538751610 | 1.714765394   |
| H200  | -6.856432635 | -9.129062784 | 0.348220941   |
| H201  | -4.932775018 | -9.367044362 | 2.287508167   |
| H202  | 8.297747386  | -9.898642718 | 4.841463253   |
| H203  | 4.486396327  | 0.427587046  | -5.534519967  |
| H204  | 5.106346498  | -5.434872312 | -4.624465331  |
| H205  | 6.924542143  | 3.868429162  | -7.189695182  |
| H206  | 7.562478853  | 4.423664149  | -5.619948184  |
| H207  | 4.629700832  | 4.113439893  | -6.471075290  |
| H208  | 2.889991407  | 9.105396741  | -3.682229637  |
| H209  | 5.882867974  | 6.256990364  | -7.021125798  |
| H210  | 0.387243124  | 1.556156818  | -4.224880732  |
| H211  | 0.880775967  | -0.872022795 | -6.020258497  |
| H212  | 3.941111157  | 6.721407115  | -4.005536564  |
| H213  | 1.925590492  | 7.897441187  | -5.821753630  |
| H214  | 6.077284404  | 6.605013835  | -4.094640273  |
| H215  | 3.668720468  | -0.894034900 | -4.703332896  |

|      |               |              |              |
|------|---------------|--------------|--------------|
| H216 | 5.074553881   | 4.342099490  | -4.777497332 |
| H217 | 7.297713781   | 6.568119468  | -5.201090742 |
| H218 | -0.697617622  | 1.874746778  | -7.714352540 |
| H219 | -0.571848105  | 0.090800556  | -3.968328939 |
| H220 | 7.727933038   | 3.022534009  | -4.035001594 |
| H221 | 1.445715247   | -0.932535963 | -4.355868232 |
| H222 | -5.493139827  | -0.104598081 | -0.486921796 |
| H223 | -2.684987192  | -0.079090191 | -0.982299513 |
| H224 | -7.429701825  | -0.715070697 | -4.845795289 |
| H225 | -4.963195213  | 0.930420865  | -5.192753138 |
| H226 | -7.668025410  | 2.087374945  | -2.156854055 |
| H227 | -12.289733156 | 3.670085111  | -0.137642687 |
| H228 | -10.213097021 | 0.527308763  | -1.148335840 |
| H229 | -10.115744511 | 2.765706703  | -2.768925164 |
| H230 | -9.098828976  | 3.109094615  | 0.122248127  |
| H231 | -11.902626528 | 7.454880344  | -1.997079043 |
| H232 | -5.129583820  | 2.099880061  | 0.597076956  |
| H233 | -5.394159977  | 2.943496407  | -0.930811900 |
| H234 | -13.264652876 | 6.011180693  | -0.388427830 |
| H235 | -8.873763230  | 3.941583775  | -2.338243525 |
| H236 | -5.147993708  | 1.222531970  | -2.965026184 |
| H237 | -5.789507427  | -1.364331838 | -4.790342160 |
| H238 | -6.919567855  | 3.494451456  | -6.514034763 |
| H239 | -0.670970183  | 3.651397930  | -0.920636169 |
| H240 | -6.177358231  | 2.485811192  | -7.769887930 |
| H241 | 2.655544973   | -3.599634161 | 10.034596640 |
| H242 | 1.791308952   | -2.761782474 | 8.929413648  |
| H243 | -1.607885171  | 3.962610095  | 4.984346759  |
| H244 | -3.851366173  | 3.155022529  | 3.307053697  |
| H245 | -3.621555586  | 4.139382582  | 6.698160217  |
| H246 | -3.199503533  | 4.151925707  | -0.625173311 |
| H247 | -3.748044132  | 5.916893625  | -1.626756046 |
| H248 | -4.759772679  | 5.823667235  | -0.405361571 |
| H249 | -1.864045874  | 5.244494826  | -3.785235748 |
| H250 | -2.795057285  | 5.772250006  | -5.220477003 |
| H251 | -5.691984952  | 8.441807548  | 7.226274842  |
| H252 | -7.282712926  | 9.211547554  | 6.971563941  |
| H253 | -4.384977326  | 7.972726060  | 5.353574419  |
| H254 | -5.053751004  | 8.007359580  | 3.735368391  |
| H255 | -3.380855797  | 10.645419525 | 2.221477011  |
| H256 | -0.626584690  | 7.823272548  | 0.095371500  |
| H257 | -8.860332475  | 7.014377102  | 0.010800110  |
| H258 | -7.499541206  | 3.957305165  | 3.697044458  |
| H259 | -5.069617198  | 7.796735389  | 1.025417143  |
| H260 | 0.150832493   | 5.407691478  | 3.472328725  |
| H261 | -0.448303744  | 5.801527226  | 5.799223193  |
| H262 | -1.250052506  | 5.548358431  | 1.394002490  |
| H263 | -4.070331481  | 2.690660736  | -6.691001851 |
| H264 | -0.705089505  | 7.960240336  | 8.156989854  |
| H265 | -1.552228842  | 3.435448119  | -5.804729445 |
| H266 | 0.300310950   | 7.167275865  | 3.509662542  |
| H267 | -5.805476256  | 4.789800355  | 2.109950900  |
| H268 | -4.670479266  | 5.579824429  | -3.633498248 |
| H269 | -2.130939770  | 6.989033063  | 8.573762304  |
| H270 | -1.823321054  | 10.195157535 | 1.631809440  |
| H271 | -5.209161767  | 9.476759852  | 1.380812765  |
| H272 | 0.641703848   | 1.978954263  | -6.715823909 |
| H273 | -1.333286885  | 0.151357553  | -6.332551114 |
| H274 | -10.537092727 | 6.281687846  | 1.678365213  |
| H275 | -3.395263502  | 3.301938259  | -3.500862047 |
| H276 | -2.144270187  | 7.399438305  | 3.952043736  |
| H277 | -0.707696936  | 8.531703939  | 1.708706739  |
| H278 | 0.396971805   | 6.154696185  | 1.274986883  |
| H279 | -2.989431941  | 7.008459599  | 0.445629694  |
| H280 | -6.123766306  | 2.811378982  | 7.298197424  |
| H281 | -5.786784796  | 5.933583167  | 6.194525793  |
| H282 | -7.504176345  | 7.132262161  | 8.232335012  |
| H283 | -4.981890599  | 3.562739736  | 8.432300307  |
| H284 | -8.229873057  | 5.376957215  | 5.434083331  |
| H285 | 9.558692489   | 4.787522822  | -0.093340235 |
| H286 | 9.910189071   | 3.200693255  | -0.800715678 |
| H287 | 10.283749475  | -0.885591634 | 1.817079889  |
| H288 | 11.711322710  | 4.691237024  | -1.292741733 |

|      |               |               |              |
|------|---------------|---------------|--------------|
| H289 | 10.896358678  | 4.498062064   | -2.700488648 |
| H290 | 1.082423433   | 1.913884306   | 7.360511689  |
| H291 | -1.142483621  | 2.352478637   | 9.473957186  |
| H292 | 0.615812362   | 6.051359160   | 8.194464605  |
| H293 | -0.665699333  | 2.138586021   | 7.020115570  |
| H294 | -0.156090648  | 3.214690414   | 10.452970546 |
| H295 | 4.728525294   | 5.746242674   | 4.541729308  |
| H296 | 1.149999396   | 3.990834018   | 8.652104639  |
| H297 | 4.069937114   | -8.873804442  | 0.803684052  |
| H298 | 7.040539096   | -8.127760726  | 0.993325479  |
| H299 | 5.191424732   | 5.509394130   | 2.213793842  |
| H300 | 1.071960841   | -3.371500085  | 4.206002954  |
| H301 | 4.193496735   | 7.674403439   | -0.339962002 |
| H302 | 3.064648580   | 2.409728611   | -3.078965803 |
| H303 | 2.842900179   | 6.619820357   | 0.064293366  |
| H304 | 2.483849791   | -6.797785270  | 1.437967003  |
| H305 | 4.808106881   | 4.808098866   | 0.348212367  |
| H306 | 3.586440893   | -5.735937077  | 0.557933375  |
| H307 | 4.918996898   | -7.631249337  | -0.142947803 |
| H308 | 5.464416903   | -6.430943519  | 2.071379113  |
| H309 | 4.384562873   | -7.570085457  | 2.892730531  |
| H310 | 0.974385855   | 5.762082838   | -5.696299737 |
| H311 | 5.742068225   | -10.544398255 | -0.222332405 |
| H312 | 7.314993598   | -10.509260830 | -2.867563402 |
| H313 | 2.541346261   | 3.011490822   | -0.709346205 |
| H314 | 6.685921160   | -12.735283278 | -1.092918224 |
| H315 | 6.058102880   | -12.354966480 | -2.556713252 |
| H316 | 3.890755392   | -4.387198882  | 2.515511494  |
| H317 | 1.179509027   | 4.991476025   | -0.213374437 |
| H318 | 2.287739777   | 3.878755225   | -4.926323144 |
| H319 | 10.860254839  | -6.225759274  | -0.687795768 |
| H320 | 10.697399802  | -2.773717717  | -0.558455742 |
| H321 | 8.481587237   | -6.098713458  | -0.160216584 |
| H322 | 11.415647884  | -5.560221018  | -1.965476175 |
| H323 | 6.811466201   | 7.706314121   | 3.533149475  |
| H324 | 6.927450332   | -4.067679577  | 1.654246169  |
| H325 | 5.043045887   | -5.327901272  | -2.472907221 |
| H326 | 7.331438091   | 4.339548153   | -0.186422285 |
| H327 | 7.308502069   | -5.049917406  | -3.555100055 |
| H328 | 9.910271574   | 1.257837033   | -3.183061035 |
| H329 | 7.492348248   | 0.807598382   | -2.514383006 |
| H330 | 8.463527983   | -11.458585234 | -1.915168952 |
| H331 | 2.547320342   | -2.843374762  | 3.459829175  |
| H332 | 7.898813050   | -5.868207083  | 2.887291113  |
| H333 | 6.616440049   | -3.647475775  | 3.117018284  |
| H334 | 7.587258220   | -8.226434437  | 3.122387880  |
| H335 | 1.198278733   | -6.693996238  | 3.071539551  |
| H336 | 10.247895955  | -4.119312642  | -5.935159415 |
| H337 | 8.802466790   | -2.394988745  | -3.194770665 |
| H338 | 9.075876375   | -3.798992547  | -2.143369219 |
| H339 | 6.975431187   | -3.494830791  | -4.369506205 |
| H340 | 5.468661245   | 3.450797178   | -1.461704782 |
| H341 | 0.404834128   | 6.502378578   | -2.066974275 |
| H342 | 0.044597423   | 6.784012732   | -4.572325149 |
| H343 | 4.273354460   | -3.879238482  | -1.749743535 |
| H344 | 8.840786713   | -6.674161807  | 1.948900657  |
| H345 | 9.014811789   | -7.555863828  | -0.129800444 |
| H346 | 0.088242516   | -5.443683963  | 3.502956698  |
| H347 | 11.557368044  | -0.177637536  | -1.842701519 |
| H348 | 9.180733224   | -2.604893988  | 0.335950211  |
| H349 | 6.112782250   | 4.301813751   | -2.899272172 |
| H350 | 4.076148419   | 7.375781953   | 4.230297901  |
| H351 | 1.867214831   | -5.257174792  | 6.283873721  |
| H352 | 2.736382423   | -3.703813236  | 6.348230752  |
| H353 | 12.624012624  | -0.689409966  | 1.761741366  |
| H354 | 12.783773641  | -1.736071876  | 0.514738658  |
| H355 | 11.971969256  | -5.980841885  | 2.086484619  |
| H356 | 11.371085934  | -4.220494104  | 0.769875330  |
| H357 | 13.426646516  | -4.045449436  | 3.377554065  |
| H358 | 10.687199581  | -5.448583621  | 3.193261620  |
| H359 | 4.574569438   | -4.757361522  | 8.121284974  |
| H360 | -11.075180143 | 5.019715013   | 6.907921894  |
| H361 | 6.757187074   | -10.749035397 | 4.542643894  |

|       |               |               |              |
|-------|---------------|---------------|--------------|
| H362  | 5.681680074   | -8.381302962  | 5.420564739  |
| H363  | -10.544367612 | 6.787140110   | 4.495371061  |
| H364  | -9.883139670  | 3.779684647   | 4.383808668  |
| H365  | -11.155506131 | 4.596729477   | 3.454806498  |
| H366  | 3.250482298   | -1.175559954  | -1.258106639 |
| H367  | -6.677347143  | 6.905569875   | -0.632620739 |
| H368  | 1.714335656   | -1.024822763  | 1.866806772  |
| H369  | 0.984449542   | -0.766933991  | -0.596367006 |
| H370  | -0.393186196  | 1.152247765   | -1.003637144 |
| Mo371 | 6.204989120   | -1.297321747  | -0.290837188 |
| N372  | 0.101982721   | -1.695411511  | -9.629708197 |
| N373  | -3.609513632  | -1.423372206  | -9.278884393 |
| N374  | -4.870603181  | -3.906791589  | -8.749405242 |
| N375  | -2.871470622  | -5.388176092  | -7.441642780 |
| N376  | -2.487018718  | -3.801021296  | -5.081415093 |
| N377  | -5.052059523  | -4.116913851  | -3.887889838 |
| N378  | -5.439384071  | -6.990368159  | -3.676819552 |
| N379  | -3.016379233  | -8.240580485  | -2.743874249 |
| N380  | -2.061482444  | -6.764765218  | -0.608795539 |
| N381  | -4.059104428  | -5.326597618  | 1.085204386  |
| N382  | -6.156666716  | -7.352840675  | 1.159578987  |
| N383  | 6.364419894   | -11.954110988 | -1.668996414 |
| N384  | 6.428887934   | -9.798314417  | -0.067171088 |
| N385  | 3.175305750   | -5.120073936  | 2.504579019  |
| N386  | 1.000373163   | -5.701407118  | 3.137484443  |
| N387  | 1.796395284   | -3.550046831  | 3.513866719  |
| N388  | 7.069073430   | -9.113714168  | 3.308050558  |
| N389  | -0.392314595  | 2.047733900   | -6.754190732 |
| N390  | 3.615820369   | -0.031804386  | -5.250455983 |
| N391  | -2.311996218  | 3.020995174   | -5.240381896 |
| N392  | -4.896836135  | 3.047475097   | -6.217419756 |
| N393  | -5.957284712  | 0.684561135   | -5.244382014 |
| N394  | -5.822196183  | 0.692586913   | -2.415215051 |
| N395  | -2.788231926  | 3.187627390   | -0.743063238 |
| N396  | -1.337286741  | 1.607652795   | -1.012619876 |
| N397  | -8.008053273  | 1.898231161   | -1.216774316 |
| N398  | -10.649863446 | 5.711511452   | -2.198617340 |
| N399  | -12.433370123 | 5.692095873   | -0.879308895 |
| N400  | 2.596871628   | -3.384838446  | 9.036140005  |
| N401  | -0.173363408  | 2.666943362   | 9.588268287  |
| N402  | -0.388433027  | 5.904432131   | 8.140036271  |
| N403  | -1.178181084  | 6.476200204   | 5.525692707  |
| N404  | -2.525808718  | 7.778933322   | 0.957973715  |
| N405  | -2.761808072  | 9.911707591   | 1.891503038  |
| N406  | -4.638984706  | 8.635529560   | 1.419619324  |
| N407  | -2.515623876  | 4.176673482   | 4.530532293  |
| N408  | -4.577839115  | 3.907380965   | 6.411937281  |
| N409  | -6.534557428  | 5.891032612   | 6.888250662  |
| N410  | -5.208589217  | 8.039111943   | 4.742352211  |
| N411  | -9.012597518  | 5.975075306   | 5.685476320  |
| N412  | 10.833824544  | 4.915226548   | -1.767042719 |
| N413  | 7.313357720   | 4.413831892   | -1.209466740 |
| N414  | 4.697560706   | 5.666167216   | -0.230101705 |
| N415  | 4.800262724   | 6.401360760   | 2.541395610  |
| N416  | 6.317157589   | 6.825304923   | -5.069467640 |
| N417  | 3.454401363   | 6.919919143   | -4.886305007 |
| N418  | 12.162813203  | -1.022470275  | 0.910143861  |
| N419  | 8.344151137   | -0.594089096  | -1.126759843 |
| N420  | 9.637186899   | 0.605954190   | -2.453391401 |
| N421  | 11.382897467  | -4.021086087  | 1.769949069  |
| N422  | -1.248301691  | 0.303843898   | 1.973824038  |
| N423  | -0.118249869  | 0.402974276   | 1.975621921  |
| O424  | -2.073577209  | -2.351167158  | -7.875595427 |
| O425  | -5.445428925  | -3.119828593  | -6.688872136 |
| O426  | -4.501178391  | -6.705773063  | -6.531881165 |
| O427  | -2.009023927  | -5.761386399  | -4.026065020 |
| O428  | -4.054273018  | -3.783445014  | -1.865691812 |
| O429  | -6.469879030  | -6.514084152  | -1.692463672 |
| O430  | -4.303146429  | -9.949629830  | -1.917270687 |
| O431  | -0.389052444  | -8.289598255  | -0.194542089 |
| O432  | -2.615991982  | -6.071269631  | 2.693162668  |
| O433  | -6.057595771  | -7.028624987  | 3.404208853  |
| O434  | -6.541631199  | -10.484072133 | 2.864380063  |



|  |                                  |               |               |               |
|--|----------------------------------|---------------|---------------|---------------|
|  | O435                             | 8.510429392   | -9.123222146  | -0.820204986  |
|  | O436                             | 5.595385271   | -10.679932387 | 2.495161373   |
|  | O437                             | 6.911071854   | -9.076403698  | 6.891454087   |
|  | O438                             | -3.067848911  | 0.970830241   | -4.543632039  |
|  | O439                             | 2.373441322   | 1.584208037   | -6.262163032  |
|  | O440                             | -5.648555385  | 4.257395667   | -4.427167565  |
|  | O441                             | -3.769606093  | 5.907525897   | -3.376268463  |
|  | O442                             | -8.004696152  | 1.151595483   | -6.180471310  |
|  | O443                             | -7.051581222  | -1.227874882  | -2.331573008  |
|  | O444                             | -7.581163647  | 0.764191914   | 0.725110403   |
|  | O445                             | -11.141552781 | 1.502925769   | 0.383418870   |
|  | O446                             | 3.734960945   | -6.618321562  | 8.193405220   |
|  | O447                             | -2.971508056  | -1.393499625  | 6.578864754   |
|  | O448                             | -2.090909994  | 4.390643469   | 8.138545300   |
|  | O449                             | -2.751469440  | 7.972334299   | 6.284561371   |
|  | O450                             | -3.607473259  | 5.570541372   | 3.076753279   |
|  | O451                             | -5.794794875  | 2.681138536   | 4.903338310   |
|  | O452                             | -2.724102579  | 1.452875009   | 5.963565264   |
|  | O453                             | -7.320311020  | 4.750029358   | 8.710253312   |
|  | O454                             | -9.661858568  | 7.785151405   | 6.911839777   |
|  | O455                             | -7.370020533  | 8.695208047   | 4.402510732   |
|  | O456                             | -12.579861322 | 5.687166316   | 5.698442967   |
|  | O457                             | -6.243971570  | 6.409099785   | 0.088089023   |
|  | O458                             | 8.538056753   | 4.159742334   | -3.139295441  |
|  | O459                             | 5.001771493   | 6.523549792   | -2.331610174  |
|  | O460                             | 3.420073166   | 8.175838030   | 2.116458651   |
|  | O461                             | 6.570518967   | 7.385220410   | 5.535376561   |
|  | O462                             | 3.473520480   | 6.806666497   | -7.164768617  |
|  | O463                             | 6.173943802   | 1.523822192   | -6.230501714  |
|  | O464                             | 7.330196251   | 2.190531802   | -4.443015619  |
|  | O465                             | 0.920389491   | 8.807949826   | -3.245279528  |
|  | O466                             | 11.051504822  | -2.594267164  | 3.498182154   |
|  | O467                             | 12.792065579  | -5.391523008  | 4.773857784   |
|  | O468                             | 3.637202695   | -2.852434028  | -4.070444874  |
|  | O469                             | 4.561886236   | -4.683351134  | -4.927952898  |
|  | O470                             | 10.713371455  | -4.792270960  | -3.797761770  |
|  | O471                             | 9.551165400   | -3.691836318  | -5.392499641  |
|  | O472                             | 7.125029102   | -3.361260586  | -0.017189360  |
|  | O473                             | 7.112946869   | -5.427464311  | -0.919476908  |
|  | O474                             | 6.218321453   | -2.195409712  | -2.188180812  |
|  | O475                             | 8.473312811   | -6.676426378  | 2.872816948   |
|  | O476                             | 6.764756195   | -4.435733807  | 2.560760118   |
|  | O477                             | -3.799116157  | 5.769116581   | -0.639925539  |
|  | O478                             | 11.708113263  | -5.936314890  | -1.109658338  |
|  | O479                             | 9.244550661   | -6.643727889  | 0.188078317   |
|  | S480                             | 0.683488572   | 3.628623730   | 5.669549292   |
|  | S481                             | 1.846616009   | 2.984177766   | 2.080188540   |
|  | S482                             | 5.177763835   | 0.654841890   | -1.207321625  |
|  | S483                             | 1.592102753   | 0.083080218   | 4.250832432   |
|  | S484                             | 1.607105036   | 0.426000726   | -0.377018438  |
|  | S485                             | 5.827704063   | 3.230426649   | 1.567447424   |
|  | S486                             | 4.255528856   | -2.488886935  | 0.480532739   |
|  | S487                             | 4.153696564   | 2.215704063   | 4.739347469   |
|  | S488                             | 7.059520914   | -0.427887662  | 1.759662073   |
|  | S489                             | 4.597170870   | -1.763455199  | 4.202482289   |
|  | D 47(1)                          |               |               |               |
|  | TS                               |               |               |               |
|  | Fe( 139)                         | 0.547         | 2.399         |               |
|  | Fe( 140)                         | 0.356         | -0.918        |               |
|  | Fe( 141)                         | 0.562         | 2.733         |               |
|  | Fe( 142)                         | 0.555         | -2.690        |               |
|  | Fe( 143)                         | 0.606         | 3.175         |               |
|  | Fe( 144)                         | 0.514         | -2.191        |               |
|  | Fe( 145)                         | 0.333         | -1.156        |               |
|  | bm2cnx2b6x2hn2n2xd1te 1 53121.71 |               |               |               |
|  | C1                               | -2.327484494  | -1.784894137  | -8.955005437  |
|  | C2                               | -1.270790841  | -1.531910011  | -10.035127256 |
|  | C3                               | -4.679538592  | -1.503656231  | -8.306788270  |
|  | C4                               | -5.012676007  | -2.920276607  | -7.843985176  |
|  | C5                               | -5.104764998  | -5.298776143  | -8.388469692  |
|  | C6                               | -4.123005834  | -5.855009493  | -7.352893249  |
|  | C7                               | -1.858212983  | -5.741692832  | -6.424590246  |
|  | C8                               | -2.112406072  | -5.091979146  | -5.060937932  |
|  | C9                               | -2.793106078  | -3.093980069  | -3.836247815  |
|  | C10                              | -4.011776864  | -3.674183536  | -3.102238531  |
|  | C11                              | -6.217362774  | -4.688108617  | -3.265915200  |
|  | C12                              | -6.015791806  | -6.131578188  | -2.782885074  |
|  | C13                              | -5.366680816  | -8.410960951  | -3.408019420  |
|  | C14                              | -4.164112914  | -8.921980497  | -2.607372936  |
|  | C15                              | -1.775425082  | -8.666447050  | -2.096738410  |
|  | C16                              | -1.340362754  | -7.882448051  | -0.856021339  |

|     |               |               |              |
|-----|---------------|---------------|--------------|
| C17 | -1.716650182  | -5.821091503  | 0.472329757  |
| C18 | -2.823591606  | -5.737852696  | 1.538855182  |
| C19 | -1.315590110  | -4.440580634  | -0.115447992 |
| C20 | -1.135978472  | -3.370827910  | 0.965440063  |
| C21 | -0.048889694  | -4.566219909  | -0.970110970 |
| C22 | -5.188743062  | -5.237859792  | 2.036606301  |
| C23 | -5.823229521  | -6.619167894  | 2.288740516  |
| C24 | -6.217116844  | -4.187308934  | 1.554469437  |
| C25 | -7.460756876  | -4.179926747  | 2.450985419  |
| C26 | -5.581691210  | -2.790861510  | 1.507711736  |
| C27 | -6.792594348  | -8.644814495  | 1.370205639  |
| C28 | -6.010707265  | -9.561268843  | 2.292075409  |
| C29 | 7.458635812   | -10.994549847 | -1.906764091 |
| C30 | 7.514719972   | -9.878828097  | -0.862245493 |
| C31 | 6.212848070   | -8.860173252  | 1.014734104  |
| C32 | 6.254120153   | -9.641628779  | 2.342263297  |
| C33 | 4.870303841   | -8.129965846  | 0.828346477  |
| C34 | 4.582342454   | -7.092816677  | 1.917094745  |
| C35 | 3.400605988   | -6.203409978  | 1.529722968  |
| C36 | 1.984444378   | -4.796782592  | 3.042534257  |
| C37 | 7.238388930   | -9.760691848  | 4.581499887  |
| C38 | 6.568003555   | -9.012643619  | 5.714133783  |
| C39 | -0.992841814  | 1.058588705   | -5.809526145 |
| C40 | -2.238542055  | 1.652975237   | -5.130554270 |
| C41 | -0.000478744  | 0.650489935   | -4.694339659 |
| C42 | 1.185483625   | -0.232830711  | -5.135287001 |
| C43 | 2.434875446   | 0.530278357   | -5.572419834 |
| C44 | -3.312511896  | 3.767778512   | -4.496350574 |
| C45 | -4.732636403  | 3.726347355   | -5.078764675 |
| C46 | -2.865743583  | 5.223677883   | -4.259768046 |
| C47 | -6.232925961  | 2.658024498   | -6.696157488 |
| C48 | -6.828891665  | 1.416115866   | -6.015188678 |
| C49 | -6.423187386  | -0.501666792  | -4.526981286 |
| C50 | -6.470017295  | -0.383010111  | -3.002694227 |
| C51 | -5.825059169  | 0.821770486   | -0.968633900 |
| C52 | -7.244949913  | 1.113527544   | -0.423413214 |
| C53 | -4.980120146  | 2.018613794   | -0.505545362 |
| C54 | -3.512613724  | 1.991406391   | -0.781924460 |
| C55 | -2.594042396  | 0.992374473   | -0.995489302 |
| C56 | -1.486214452  | 2.913510816   | -0.929064227 |
| C57 | -9.242390627  | 2.524652697   | -0.802593118 |
| C58 | -10.267563075 | 1.437818282   | -0.487638966 |
| C59 | -9.736517645  | 3.418349620   | -1.963513173 |
| C60 | -10.741785795 | 4.477897396   | -1.619798884 |
| C61 | -11.827382450 | 4.460926583   | -0.765318009 |
| C62 | -11.660738813 | 6.432820108   | -1.763976052 |
| C63 | 2.339052565   | -4.611490293  | 8.281272587  |
| C64 | 3.633624609   | -5.399085590  | 8.198978805  |
| C65 | 1.908365198   | -4.306902322  | 6.822378090  |
| C66 | 0.600763510   | -3.556472242  | 6.738821692  |
| C67 | -0.630715453  | -4.233109872  | 6.659103290  |
| C68 | 0.577485130   | -2.149218188  | 6.755265772  |
| C69 | -1.841358435  | -3.534727820  | 6.597190268  |
| C70 | -0.622457439  | -1.438551890  | 6.707872045  |
| C71 | -1.831422786  | -2.133922160  | 6.627571192  |
| C72 | 0.151935028   | 3.521904426   | 8.473287063  |
| C73 | -0.881928974  | 4.631787268   | 8.243308106  |
| C74 | 0.275483748   | 2.643604247   | 7.218068628  |
| C75 | -1.250473518  | 7.044925047   | 7.938681724  |
| C76 | -1.789317378  | 7.199813005   | 6.514764601  |
| C77 | -1.601327613  | 6.465428249   | 4.159666433  |
| C78 | -2.645863186  | 5.360529886   | 3.886243224  |
| C79 | -0.356612627  | 6.361357534   | 3.258497556  |
| C80 | -0.565664521  | 6.380715767   | 1.741301763  |
| C81 | -1.052341269  | 7.700821492   | 1.120801676  |
| C82 | -3.285883762  | 8.774933996   | 1.357171668  |
| C83 | -3.441889255  | 3.103568092   | 4.358202326  |
| C84 | -4.704920520  | 3.235232818   | 5.229726804  |
| C85 | -2.827979002  | 1.716372014   | 4.617556512  |
| C86 | -5.524212253  | 3.712966671   | 7.479937156  |
| C87 | -6.534912131  | 4.825327870   | 7.739836261  |
| C88 | -7.346223451  | 7.067919393   | 7.142717031  |
| C89 | -8.775441374  | 6.972424778   | 6.568118830  |

|       |               |              |               |
|-------|---------------|--------------|---------------|
| C90   | -6.638577057  | 8.358259586  | 6.677629649   |
| C91   | -6.432618571  | 8.389593559  | 5.167840872   |
| C92   | -10.268384699 | 5.836178587  | 4.983615285   |
| C93   | -11.387101471 | 5.495458598  | 5.961456867   |
| C94   | -10.158673160 | 4.730950935  | 3.900110978   |
| C95   | -9.147340778  | 5.087770282  | 2.834731428   |
| C96   | -9.497843578  | 5.954335345  | 1.786676375   |
| C97   | -7.822126484  | 4.626916349  | 2.899392252   |
| C98   | -8.554105751  | 6.374494210  | 0.847287694   |
| C99   | -6.857340226  | 5.054372513  | 1.980549103   |
| C100  | -7.236576310  | 5.930014056  | 0.965675911   |
| C101  | 9.729490670   | 4.280918724  | -1.052853113  |
| C102  | 8.464156119   | 4.309040429  | -1.891690037  |
| C103  | 5.984774830   | 4.355412833  | -1.815432903  |
| C104  | 5.158679825   | 5.600964755  | -1.480266364  |
| C105  | 3.897468499   | 6.765661986  | 0.262209522   |
| C106  | 4.019324735   | 7.159338079  | 1.731364140   |
| C107  | 4.873516551   | 6.679499914  | 3.975924018   |
| C108  | 6.182552561   | 7.321781501  | 4.385094566   |
| C109  | 5.486756688   | 6.079179144  | -6.004337895  |
| C110  | 4.070474615   | 6.659505796  | -6.085222015  |
| C111  | 5.396935713   | 4.548082114  | -5.802966328  |
| C112  | 6.743708901   | 3.863775357  | -6.101046446  |
| C113  | 6.735381899   | 2.434868202  | -5.605461222  |
| C114  | 2.070957312   | 7.364629339  | -4.863673104  |
| C115  | 1.933195373   | 8.485208070  | -3.851689194  |
| C116  | 1.001897759   | 6.250974293  | -4.751435031  |
| C117  | 1.290027891   | 5.298705754  | -3.620634495  |
| C118  | 0.919657477   | 5.610204266  | -2.301930661  |
| C119  | 2.038765696   | 4.130693772  | -3.853255301  |
| C120  | 1.337404171   | 4.799285350  | -1.240903558  |
| C121  | 2.451440775   | 3.319707520  | -2.791299397  |
| C122  | 2.120543164   | 3.664728311  | -1.478606998  |
| C123  | 10.869127404  | -1.651244445 | 1.272041744   |
| C124  | 11.079178286  | -2.804554982 | 2.267638735   |
| C125  | 10.087137572  | -2.077211206 | 0.019375808   |
| C126  | 9.678483825   | -0.967382872 | -0.900594562  |
| C127  | 10.496955165  | -0.221621414 | -1.724442454  |
| C128  | 8.384364649   | 0.327431860  | -2.095072215  |
| C129  | 11.609804210  | -5.142836970 | 2.683658828   |
| C130  | 12.678164450  | -4.825188926 | 3.707050924   |
| C131  | 4.333872158   | -3.864018924 | -3.893899753  |
| C132  | 4.943203248   | -4.238327849 | -2.572620543  |
| C133  | 6.346289045   | -3.556899993 | -2.314065826  |
| C134  | 7.336151935   | -3.957224863 | -3.445899090  |
| C135  | 8.773036070   | -3.491325378 | -3.157891685  |
| C136  | 9.791983808   | -4.054529379 | -4.107522336  |
| C137  | 6.893027890   | -4.172938514 | -0.990266947  |
| C138  | 3.901962336   | 0.527965580  | 1.914781686   |
| Fe139 | 5.554728323   | 1.088079415  | 0.938299284   |
| Fe140 | 1.962660642   | 0.610362343  | 1.819042697   |
| Fe141 | 3.630217433   | 0.150582696  | 3.845755989   |
| Fe142 | 4.062217551   | 2.396452984  | 2.581672120   |
| Fe143 | 1.961695000   | 2.339937679  | 4.201738515   |
| Fe144 | 4.959766666   | -1.138475721 | 2.081039860   |
| Fe145 | 3.659641015   | -0.438633719 | -0.042067321  |
| H146  | 0.251309269   | -2.584229519 | -9.175017141  |
| H147  | 0.347307999   | -0.975720613 | -8.915806307  |
| H148  | -3.759745327  | -0.905384496 | -10.141296450 |
| H149  | -1.425915646  | -0.525971373 | -10.456862739 |
| H150  | -1.479756992  | -2.237489045 | -10.858080565 |
| H151  | -4.432768569  | -0.932815396 | -7.400528536  |
| H152  | -4.519777470  | -3.682784023 | -9.686053320  |
| H153  | -5.579859158  | -1.063967368 | -8.756789431  |
| H154  | -5.047784697  | -5.912096800 | -9.297288675  |
| H155  | -2.649846857  | -4.607074833 | -8.049996613  |
| H156  | -6.111421943  | -5.406552868 | -7.963989633  |
| H157  | -1.949778695  | -3.149997606 | -3.134833994  |
| H158  | -2.479873757  | -3.264971217 | -5.959803814  |
| H159  | -0.869639957  | -5.437059249 | -6.794265047  |
| H160  | -6.522832911  | -4.092079411 | -2.397222869  |
| H161  | -5.015688766  | -3.947037095 | -4.891576374  |
| H162  | -1.852680045  | -6.827222952 | -6.267107750  |

|      |               |              |              |
|------|---------------|--------------|--------------|
| H163 | -2.972789780  | -2.034376582 | -4.070810192 |
| H164 | -5.166660945  | -6.651119991 | -4.598374016 |
| H165 | -7.032912883  | -4.676053309 | -4.002119705 |
| H166 | -0.178706062  | -5.288177325 | -1.789108522 |
| H167 | 0.208235808   | -3.594120779 | -1.417950030 |
| H168 | 0.809501239   | -4.882442690 | -0.356189203 |
| H169 | -2.142922551  | -4.117742996 | -0.768238222 |
| H170 | -5.363705232  | -8.931116335 | -4.377206431 |
| H171 | -4.715640341  | -2.752010825 | 0.831910641  |
| H172 | -6.040455410  | -6.986754015 | 0.247474711  |
| H173 | -7.982716199  | -5.148031908 | 2.448689519  |
| H174 | -0.950517636  | -2.395549274 | 0.491766790  |
| H175 | -0.270861066  | -3.579245754 | 1.610376147  |
| H176 | 1.574061013   | -5.273395345 | 8.731059439  |
| H177 | -6.320007924  | -2.052754604 | 1.160885898  |
| H178 | -8.166657868  | -3.411016669 | 2.105122190  |
| H179 | -5.248764771  | -2.487842551 | 2.514016963  |
| H180 | -7.186998519  | -3.947016864 | 3.492438425  |
| H181 | -6.528683405  | -4.466808156 | 0.531331331  |
| H182 | -4.792702561  | -4.927965505 | 3.014650286  |
| H183 | -4.180631260  | -5.006523630 | 0.153108927  |
| H184 | -2.024710291  | -3.261015173 | 1.604270065  |
| H185 | -1.821968562  | 1.688253044  | 4.166956986  |
| H186 | -3.463874456  | 0.974325589  | 4.110968656  |
| H187 | -2.877769831  | 0.485728050  | 6.146875142  |
| H188 | -3.760609833  | -1.977064607 | 6.460160618  |
| H189 | -0.619418452  | -0.348223752 | 6.697940606  |
| H190 | 1.517871903   | -1.593570525 | 6.773727476  |
| H191 | -0.649327270  | -5.326198894 | 6.638923175  |
| H192 | -2.786151578  | -6.508147878 | -1.253746893 |
| H193 | -0.943526273  | -8.617141820 | -2.815288276 |
| H194 | -1.900940953  | -9.715021643 | -1.794906764 |
| H195 | -2.936535399  | -7.433269360 | -3.386714920 |
| H196 | -6.261510350  | -8.721866087 | -2.854381826 |
| H197 | -2.788133406  | -4.075940622 | 6.521052634  |
| H198 | -0.853847522  | -6.259089457 | 0.989998245  |
| H199 | -7.822265570  | -8.549656524 | 1.750902143  |
| H200 | -6.836546815  | -9.137785127 | 0.386043236  |
| H201 | -4.912592630  | -9.370713657 | 2.324944866  |
| H202 | 8.302385747   | -9.907935978 | 4.819990433  |
| H203 | 4.482281387   | 0.439820307  | -5.512971278 |
| H204 | 5.128894644   | -5.459675452 | -4.630281092 |
| H205 | 6.913248034   | 3.852036023  | -7.187634826 |
| H206 | 7.563996970   | 4.422851004  | -5.629051312 |
| H207 | 4.626343604   | 4.119084672  | -6.461889791 |
| H208 | 2.867365462   | 9.076061221  | -3.697962384 |
| H209 | 5.904057224   | 6.258094014  | -7.007075290 |
| H210 | 0.374483027   | 1.567369371  | -4.210740193 |
| H211 | 0.884979986   | -0.874196783 | -5.982296476 |
| H212 | 3.913625817   | 6.667977440  | -4.012296355 |
| H213 | 1.919293172   | 7.863011588  | -5.842403594 |
| H214 | 6.062286133   | 6.607917201  | -4.079791667 |
| H215 | 3.670417451   | -0.880203922 | -4.676127100 |
| H216 | 5.077280759   | 4.344958564  | -4.769254271 |
| H217 | 7.299554452   | 6.551915336  | -5.165103429 |
| H218 | -0.706360755  | 1.846217629  | -7.698808257 |
| H219 | -0.575668149  | 0.097859554  | -3.936939068 |
| H220 | 7.740380429   | 3.046901671  | -4.029956320 |
| H221 | 1.446353333   | -0.918136269 | -4.316094224 |
| H222 | -5.492971311  | -0.110484214 | -0.488177976 |
| H223 | -2.714682109  | -0.081471750 | -1.074881979 |
| H224 | -7.447306504  | -0.726769039 | -4.851041704 |
| H225 | -4.981939916  | 0.922891318  | -5.197919985 |
| H226 | -7.644840760  | 2.104850507  | -2.167769914 |
| H227 | -12.219075762 | 3.704919801  | -0.094363614 |
| H228 | -10.197660783 | 0.543160915  | -1.153030162 |
| H229 | -10.107605487 | 2.773877035  | -2.781053512 |
| H230 | -9.077664476  | 3.130021618  | 0.103265893  |
| H231 | -11.902605981 | 7.457811274  | -2.032849423 |
| H232 | -5.127631227  | 2.098121291  | 0.584168014  |
| H233 | -5.404170941  | 2.937400828  | -0.944278681 |
| H234 | -13.209206574 | 6.042847583  | -0.356023088 |
| H235 | -8.857984878  | 3.946830187  | -2.364868974 |

|      |               |              |              |
|------|---------------|--------------|--------------|
| H236 | -5.108951070  | 1.171244624  | -2.967561946 |
| H237 | -5.806066391  | -1.373608819 | -4.789982907 |
| H238 | -6.934540752  | 3.483940520  | -6.522977823 |
| H239 | -0.671467265  | 3.631336483  | -0.950895400 |
| H240 | -6.191667141  | 2.474131341  | -7.777884363 |
| H241 | 2.645223486   | -3.581977490 | 10.026701280 |
| H242 | 1.776343214   | -2.749324104 | 8.921045289  |
| H243 | -1.569317685  | 3.974802151  | 5.001703987  |
| H244 | -3.785940555  | 3.134215570  | 3.313826428  |
| H245 | -3.607232103  | 4.136923248  | 6.705919681  |
| H246 | -3.191783892  | 4.144798664  | -0.617236356 |
| H247 | -3.741005050  | 5.912067714  | -1.624218194 |
| H248 | -4.750564975  | 5.815908513  | -0.405068081 |
| H249 | -1.873492560  | 5.224879313  | -3.788897491 |
| H250 | -2.802827177  | 5.761054430  | -5.221351716 |
| H251 | -5.685873351  | 8.444969146  | 7.219814658  |
| H252 | -7.276835667  | 9.207784808  | 6.955004423  |
| H253 | -4.363743278  | 8.003846306  | 5.356045807  |
| H254 | -5.029645447  | 8.016983509  | 3.733996005  |
| H255 | -3.393903798  | 10.662237368 | 2.138553318  |
| H256 | -0.598938577  | 7.837986384  | 0.127040929  |
| H257 | -8.846756252  | 7.040966151  | 0.031741806  |
| H258 | -7.512823852  | 3.922244503  | 3.676056597  |
| H259 | -5.056895286  | 7.771860320  | 1.016894134  |
| H260 | 0.179219520   | 5.431689077  | 3.507752002  |
| H261 | -0.438889944  | 5.808150022  | 5.827723636  |
| H262 | -1.218223598  | 5.552496926  | 1.422653862  |
| H263 | -4.086528154  | 2.667141307  | -6.688896607 |
| H264 | -0.696818734  | 7.958898653  | 8.191926026  |
| H265 | -1.570798298  | 3.412228777  | -5.804949405 |
| H266 | 0.313120241   | 7.191843411  | 3.535890119  |
| H267 | -5.817527095  | 4.737164920  | 2.085124905  |
| H268 | -4.677600224  | 5.582951622  | -3.636985534 |
| H269 | -2.128779999  | 6.992058086  | 8.598030649  |
| H270 | -1.831452436  | 10.213029294 | 1.558494734  |
| H271 | -5.207362782  | 9.463856984  | 1.310398057  |
| H272 | 0.627210284   | 1.969919395  | -6.696064057 |
| H273 | -1.338702898  | 0.131668376  | -6.304346872 |
| H274 | -10.524606005 | 6.315857302  | 1.700822042  |
| H275 | -3.426855484  | 3.294019410  | -3.505726168 |
| H276 | -2.126976921  | 7.411798175  | 3.975958974  |
| H277 | -0.714557223  | 8.539881351  | 1.742792600  |
| H278 | 0.423977620   | 6.174740663  | 1.309535240  |
| H279 | -2.965749145  | 6.987013892  | 0.458866199  |
| H280 | -6.109199149  | 2.803563980  | 7.275985298  |
| H281 | -5.764017692  | 5.938723544  | 6.201429431  |
| H282 | -7.488773809  | 7.132011735  | 8.231751367  |
| H283 | -4.979594330  | 3.556922468  | 8.421411889  |
| H284 | -8.208910904  | 5.399710890  | 5.399019059  |
| H285 | 9.554298355   | 4.780259589  | -0.089395252 |
| H286 | 9.914266101   | 3.209654430  | -0.827788829 |
| H287 | 10.275091460  | -0.902655738 | 1.817032614  |
| H288 | 11.705036994  | 4.720980124  | -1.287358496 |
| H289 | 10.894520418  | 4.546843915  | -2.700103489 |
| H290 | 1.072265653   | 1.908518160  | 7.388274972  |
| H291 | -1.173423682  | 2.351193862  | 9.490053047  |
| H292 | 0.615269542   | 6.042084117  | 8.228778652  |
| H293 | -0.676277048  | 2.120652222  | 7.050407950  |
| H294 | -0.205478727  | 3.226938201  | 10.474812715 |
| H295 | 4.718408265   | 5.756110880  | 4.554958339  |
| H296 | 1.133151937   | 3.977045987  | 8.682847890  |
| H297 | 4.061419518   | -8.878682523 | 0.787091357  |
| H298 | 7.030028062   | -8.129997957 | 0.982116455  |
| H299 | 5.189846385   | 5.511182641  | 2.228691194  |
| H300 | 1.045503553   | -3.377950146 | 4.172377445  |
| H301 | 4.155423939   | 7.649973418  | -0.336002367 |
| H302 | 3.045007329   | 2.421915878  | -2.977672374 |
| H303 | 2.827457287   | 6.571117093  | 0.083800059  |
| H304 | 2.482701561   | -6.792782446 | 1.413168624  |
| H305 | 4.829227843   | 4.798821979  | 0.367944958  |
| H306 | 3.597337575   | -5.727442512 | 0.554582644  |
| H307 | 4.911239967   | -7.633013357 | -0.154832595 |
| H308 | 5.460078965   | -6.447254406 | 2.070057683  |

|       |               |               |              |
|-------|---------------|---------------|--------------|
| H309  | 4.367560286   | -7.585726071  | 2.878875733  |
| H310  | 0.983249420   | 5.713421694   | -5.710431655 |
| H311  | 5.737167035   | -10.545935783 | -0.238812559 |
| H312  | 7.307216371   | -10.496937326 | -2.877003160 |
| H313  | 2.458521498   | 3.059782807   | -0.635567129 |
| H314  | 6.695247562   | -12.727660282 | -1.099098534 |
| H315  | 6.071191723   | -12.362805795 | -2.568047740 |
| H316  | 3.891248388   | -4.405979441  | 2.544755140  |
| H317  | 1.066812368   | 5.043578553   | -0.212203918 |
| H318  | 2.306013077   | 3.852974879   | -4.875251119 |
| H319  | 10.866320807  | -6.222913273  | -0.693006605 |
| H320  | 10.706012047  | -2.785725539  | -0.560018804 |
| H321  | 8.486067240   | -6.089643381  | -0.168048241 |
| H322  | 11.436140188  | -5.540011374  | -1.956309084 |
| H323  | 6.785543286   | 7.742606242   | 3.544040153  |
| H324  | 6.928393654   | -4.055868781  | 1.652790532  |
| H325  | 5.057041005   | -5.328894515  | -2.484866313 |
| H326  | 7.327211720   | 4.322940742   | -0.184729701 |
| H327  | 7.322417888   | -5.053609545  | -3.552007663 |
| H328  | 9.946094891   | 1.232255785   | -3.198978588 |
| H329  | 7.521221396   | 0.802821972   | -2.542883694 |
| H330  | 8.464768368   | -11.445697362 | -1.934894168 |
| H331  | 2.592840297   | -2.887292033  | 3.541007307  |
| H332  | 7.898363225   | -5.877007530  | 2.885002902  |
| H333  | 6.532218401   | -3.664907017  | 3.104268058  |
| H334  | 7.587154022   | -8.233221619  | 3.104250889  |
| H335  | 1.159352986   | -6.682770761  | 3.008008492  |
| H336  | 10.263104678  | -4.132959117  | -5.937934874 |
| H337  | 8.805461434   | -2.392762245  | -3.208804078 |
| H338  | 9.084217333   | -3.791768224  | -2.151320043 |
| H339  | 6.991326897   | -3.510188229  | -4.389969050 |
| H340  | 5.471277925   | 3.441010884   | -1.475922785 |
| H341  | 0.326024923   | 6.507695717   | -2.112744983 |
| H342  | 0.028801726   | 6.749286706   | -4.620509056 |
| H343  | 4.277225556   | -3.879207299  | -1.776948720 |
| H344  | 8.837280361   | -6.672900175  | 1.934833670  |
| H345  | 9.010302835   | -7.551436073  | -0.139825400 |
| H346  | 0.065072007   | -5.430163828  | 3.456341043  |
| H347  | 11.573917824  | -0.213914448  | -1.846828282 |
| H348  | 9.185232692   | -2.619959112  | 0.328094888  |
| H349  | 6.114345324   | 4.316820991   | -2.899320567 |
| H350  | 4.063550773   | 7.382339112   | 4.232962538  |
| H351  | 1.827405520   | -5.270043714  | 6.294850047  |
| H352  | 2.707756287   | -3.722582014  | 6.338856416  |
| H353  | 12.610378972  | -0.688805254  | 1.774251393  |
| H354  | 12.787394717  | -1.734296630  | 0.528672857  |
| H355  | 11.973293458  | -5.995534560  | 2.088047006  |
| H356  | 11.371333347  | -4.236781021  | 0.769840939  |
| H357  | 13.426354240  | -4.061855837  | 3.380979220  |
| H358  | 10.685235727  | -5.462809446  | 3.190179954  |
| H359  | 4.548233115   | -4.764020393  | 8.109159235  |
| H360  | -11.054923455 | 5.016280768   | 6.911745421  |
| H361  | 6.759208080   | -10.754264844 | 4.527998929  |
| H362  | 5.708009605   | -8.367292358  | 5.412043089  |
| H363  | -10.536863987 | 6.789220603   | 4.498845720  |
| H364  | -9.886747696  | 3.778886613   | 4.382131907  |
| H365  | -11.157727277 | 4.603991316   | 3.458008104  |
| H366  | 3.265838918   | -1.178216117  | -1.294380061 |
| H367  | -6.673931003  | 6.885326070   | -0.639315574 |
| H368  | 1.917676787   | -0.902693268  | 1.749755042  |
| H369  | 0.950761251   | -0.865830167  | -0.519073246 |
| H370  | -0.409829591  | 1.129437956   | -1.095920643 |
| Mo371 | 6.187972758   | -1.287734909  | -0.325616812 |
| N372  | 0.115441639   | -1.675456278  | -9.625016527 |
| N373  | -3.600684618  | -1.423937466  | -9.281144638 |
| N374  | -4.846159510  | -3.914503691  | -8.750949574 |
| N375  | -2.851128240  | -5.387891309  | -7.427670974 |
| N376  | -2.476057306  | -3.783027473  | -5.079333688 |
| N377  | -5.037393141  | -4.101266131  | -3.880686730 |
| N378  | -5.426973748  | -6.980427500  | -3.665110893 |
| N379  | -3.001451439  | -8.222792190  | -2.737366071 |
| N380  | -2.062520043  | -6.763120608  | -0.585383988 |
| N381  | -4.054303889  | -5.329870654  | 1.113322293  |

|      |               |               |              |
|------|---------------|---------------|--------------|
| N382 | -6.142782640  | -7.358313627  | 1.194509668  |
| N383 | 6.370127513   | -11.953257481 | -1.681861360 |
| N384 | 6.423934631   | -9.801312316  | -0.077166353 |
| N385 | 3.168884295   | -5.131185242  | 2.506323621  |
| N386 | 0.967548587   | -5.688389105  | 3.066858746  |
| N387 | 1.793421785   | -3.555159532  | 3.504731482  |
| N388 | 7.069228240   | -9.119983644  | 3.291681244  |
| N389 | -0.406929429  | 2.028843056   | -6.739216092 |
| N390 | 3.613346552   | -0.018917959  | -5.223397653 |
| N391 | -2.330900146  | 3.003477322   | -5.236140198 |
| N392 | -4.913193648  | 3.034350097   | -6.223016603 |
| N393 | -5.973957743  | 0.671916681   | -5.254749515 |
| N394 | -5.817377476  | 0.679276877   | -2.424225298 |
| N395 | -2.788377578  | 3.178422306   | -0.750882266 |
| N396 | -1.354015571  | 1.594637684   | -1.091876000 |
| N397 | -7.993713230  | 1.907680355   | -1.232163560 |
| N398 | -10.649729336 | 5.714918645   | -2.238801619 |
| N399 | -12.395189500 | 5.714031743   | -0.868921931 |
| N400 | 2.580433484   | -3.374571669  | 9.027022919  |
| N401 | -0.206388485  | 2.668140736   | 9.616274450  |
| N402 | -0.389418228  | 5.901415614   | 8.167753597  |
| N403 | -1.163570540  | 6.488556313   | 5.552900500  |
| N404 | -2.511179063  | 7.767649280   | 0.963839103  |
| N405 | -2.766313744  | 9.927256991   | 1.828023712  |
| N406 | -4.632375454  | 8.628050643   | 1.378089427  |
| N407 | -2.481296839  | 4.185425045   | 4.549951433  |
| N408 | -4.561278013  | 3.912232281   | 6.406929593  |
| N409 | -6.520638548  | 5.890727996   | 6.884586194  |
| N410 | -5.184240821  | 8.066971181   | 4.740008129  |
| N411 | -9.000232396  | 5.972061417   | 5.682535275  |
| N412 | 10.827151866  | 4.947710836   | -1.759941907 |
| N413 | 7.308221229   | 4.412806473   | -1.206712474 |
| N414 | 4.698269055   | 5.652299454   | -0.213491412 |
| N415 | 4.794195558   | 6.402525564   | 2.552326434  |
| N416 | 6.320024564   | 6.822199204   | -5.051230048 |
| N417 | 3.440857796   | 6.886523155   | -4.896323329 |
| N418 | 12.158316372  | -1.024845514  | 0.918729573  |
| N419 | 8.353741162   | -0.600910435  | -1.143220342 |
| N420 | 9.663003578   | 0.584710302   | -2.469054800 |
| N421 | 11.384170155  | -4.034858501  | 1.769325005  |
| N422 | -1.580588076  | 0.118638269   | 1.868173903  |
| N423 | -0.553014554  | 0.551442215   | 1.836088859  |
| O424 | -2.060103315  | -2.324942552  | -7.865250732 |
| O425 | -5.428958811  | -3.128329775  | -6.692639811 |
| O426 | -4.484757886  | -6.702866950  | -6.521297898 |
| O427 | -2.000827663  | -5.733433691  | -4.004040598 |
| O428 | -4.044888122  | -3.727194551  | -1.862608081 |
| O429 | -6.417174424  | -6.492173678  | -1.663007034 |
| O430 | -4.275944777  | -9.946356412  | -1.920883356 |
| O431 | -0.371662040  | -8.272653605  | -0.189988781 |
| O432 | -2.590099735  | -6.029379571  | 2.721629115  |
| O433 | -6.038609758  | -7.034892468  | 3.439459944  |
| O434 | -6.518919058  | -10.490556073 | 2.900877471  |
| O435 | 8.508450962   | -9.122674509  | -0.818937423 |
| O436 | 5.577501759   | -10.674926718 | 2.489898829  |
| O437 | 6.915251947   | -9.106731488  | 6.880884505  |
| O438 | -3.082901449  | 0.954703472   | -4.527049227 |
| O439 | 2.363483055   | 1.591810251   | -6.233367703 |
| O440 | -5.662430884  | 4.275808128   | -4.452227443 |
| O441 | -3.774055408  | 5.899193696   | -3.375076318 |
| O442 | -8.021990110  | 1.140284895   | -6.189203335 |
| O443 | -7.102538616  | -1.204531293  | -2.335157706 |
| O444 | -7.591764502  | 0.758256150   | 0.704926190  |
| O445 | -11.122739855 | 1.525984886   | 0.376058236  |
| O446 | 3.699323329   | -6.619951255  | 8.202948573  |
| O447 | -2.992310988  | -1.385986081  | 6.565129755  |
| O448 | -2.101031367  | 4.398704351   | 8.146973435  |
| O449 | -2.739451198  | 7.983876653   | 6.310858793  |
| O450 | -3.587987486  | 5.575043438   | 3.102642433  |
| O451 | -5.763150057  | 2.697566980   | 4.875671073  |
| O452 | -2.763639515  | 1.450422369   | 6.020868955  |
| O453 | -7.331771615  | 4.726913647   | 8.681372637  |
| O454 | -9.657810900  | 7.763859736   | 6.929879850  |

|                        |                                             |
|------------------------|---------------------------------------------|
|                        | O455 -7.368695191 8.630358928 4.388887988   |
|                        | O456 -12.566392909 5.691054891 5.715866267  |
|                        | O457 -6.243650880 6.384086656 0.080157988   |
|                        | O458 8.528546626 4.206714475 -3.143675014   |
|                        | O459 4.951655407 6.499739004 -2.325987415   |
|                        | O460 3.388471934 8.155823320 2.121653075    |
|                        | O461 6.562327685 7.392949035 5.542830807    |
|                        | O462 3.517607254 6.870013038 -7.177363269   |
|                        | O463 6.176259406 1.515170378 -6.194987712   |
|                        | O464 7.349026911 2.207235249 -4.428169545   |
|                        | O465 0.897392227 8.774288571 -3.268974475   |
|                        | O466 11.059287658 -2.605857694 3.496867636  |
|                        | O467 12.782396939 -5.401907869 4.779922985  |
|                        | O468 3.649049688 -2.874701561 -4.111659674  |
|                        | O469 4.584569975 -4.712334529 -4.943947326  |
|                        | O470 10.755136226 -4.748318437 -3.789981322 |
|                        | O471 9.553591713 -3.718726110 -5.401777578  |
|                        | O472 7.127663081 -3.330088388 -0.038604968  |
|                        | O473 7.118317807 -5.403975242 -0.921496248  |
|                        | O474 6.211298919 -2.187438799 -2.220132515  |
|                        | O475 8.471491038 -6.684197260 2.859352861   |
|                        | O476 6.771972284 -4.436670589 2.553789195   |
|                        | O477 -3.790587254 5.765180096 -0.638405524  |
|                        | O478 11.719053867 -5.930999177 -1.103703739 |
|                        | O479 9.247071495 -6.641353082 0.176167843   |
|                        | S480 0.671544601 3.610831658 5.688101033    |
|                        | S481 1.958641872 3.073709136 2.079087878    |
|                        | S482 5.169248280 0.677545011 -1.234714506   |
|                        | S483 1.384651216 0.101159918 4.017420692    |
|                        | S484 1.526850778 0.365573772 -0.458017788   |
|                        | S485 5.888200259 3.214015886 1.586768102    |
|                        | S486 4.256396761 -2.485219609 0.444208234   |
|                        | S487 4.181280625 2.172865933 4.794957552    |
|                        | S488 7.040854671 -0.430531972 1.731765721   |
|                        | S489 4.552231932 -1.877279258 4.120322289   |
| D 47(1)<br>dissociated | bm2cnx2b6x2hn2n2xd1te 2 53125.96            |
| Fe( 139) 0.548 2.417   | C1 -2.326451552 -1.787246142 -8.942496029   |
| Fe( 140) 0.349 -0.884  | C2 -1.272217034 -1.540492327 -10.027434171  |
| Fe( 141) 0.551 2.646   | C3 -4.679201925 -1.499333194 -8.298493605   |
| Fe( 142) 0.553 -2.708  | C4 -5.018265067 -2.916364232 -7.839280361   |
| Fe( 143) 0.607 3.183   | C5 -5.116578682 -5.294644489 -8.385817547   |
| Fe( 144) 0.521 -2.216  | C6 -4.132474816 -5.854337012 -7.356555177   |
| Fe( 145) 0.323 -1.018  | C7 -1.864654089 -5.744297258 -6.433503146   |
|                        | C8 -2.116524813 -5.099805382 -5.066834521   |
|                        | C9 -2.795766696 -3.106893881 -3.835167382   |
|                        | C10 -4.015863113 -3.688927297 -3.102588546  |
|                        | C11 -6.225232187 -4.694183195 -3.271398741  |
|                        | C12 -6.028004350 -6.138754119 -2.790972723  |
|                        | C13 -5.370677321 -8.415833058 -3.414222416  |
|                        | C14 -4.174089560 -8.923592945 -2.603500750  |
|                        | C15 -1.784669863 -8.672236621 -2.092777672  |
|                        | C16 -1.341795309 -7.883664762 -0.856430991  |
|                        | C17 -1.703664795 -5.812568413 0.465330339   |
|                        | C18 -2.819541589 -5.738124706 1.526104741   |
|                        | C19 -1.303729737 -4.434089527 -0.119915952  |
|                        | C20 -1.114120910 -3.374528785 0.968327840   |
|                        | C21 -0.042019040 -4.563178716 -0.981718093  |
|                        | C22 -5.183029547 -5.228033621 2.022375347   |
|                        | C23 -5.816976918 -6.609302590 2.272127499   |
|                        | C24 -6.213144210 -4.180300926 1.539234210   |
|                        | C25 -7.459163315 -4.177572383 2.431710926   |
|                        | C26 -5.582826090 -2.781916989 1.497379509   |
|                        | C27 -6.783404860 -8.632586615 1.352052094   |
|                        | C28 -6.007483698 -9.554307779 2.273648680   |
|                        | C29 7.457816885 -10.994525993 -1.902038758  |
|                        | C30 7.515590306 -9.874984139 -0.860216151   |
|                        | C31 6.217791320 -8.857475159 1.021266128    |
|                        | C32 6.259481428 -9.639871407 2.347300992    |
|                        | C33 4.875600057 -8.125118223 0.837980090    |
|                        | C34 4.587927012 -7.085820795 1.924887040    |
|                        | C35 3.403651555 -6.199202622 1.541207056    |
|                        | C36 1.993717329 -4.792992940 3.060001600    |



|      |               |              |              |
|------|---------------|--------------|--------------|
| C37  | 7.236871463   | -9.759180354 | 4.590645148  |
| C38  | 6.560336118   | -9.010257203 | 5.719121893  |
| C39  | -0.981237831  | 1.065233131  | -5.804409776 |
| C40  | -2.227566824  | 1.660160294  | -5.126281420 |
| C41  | 0.010650640   | 0.648491672  | -4.694359055 |
| C42  | 1.191196608   | -0.237185824 | -5.144917726 |
| C43  | 2.441395805   | 0.524804783  | -5.582093380 |
| C44  | -3.302547172  | 3.771477960  | -4.490619982 |
| C45  | -4.724355333  | 3.725557340  | -5.071011648 |
| C46  | -2.862104771  | 5.230113479  | -4.255619293 |
| C47  | -6.224066998  | 2.663501212  | -6.691515456 |
| C48  | -6.819192824  | 1.421081264  | -6.011969744 |
| C49  | -6.414293525  | -0.498212698 | -4.526359321 |
| C50  | -6.458018703  | -0.386665538 | -3.002239608 |
| C51  | -5.819097089  | 0.820342995  | -0.968921049 |
| C52  | -7.237957420  | 1.105964639  | -0.418495612 |
| C53  | -4.980103873  | 2.021850836  | -0.506709213 |
| C54  | -3.513552406  | 1.997002613  | -0.783676599 |
| C55  | -2.594965368  | 1.000282817  | -1.002653083 |
| C56  | -1.487763811  | 2.920126444  | -0.922285225 |
| C57  | -9.232570023  | 2.517688761  | -0.786900614 |
| C58  | -10.262261765 | 1.433722353  | -0.475391058 |
| C59  | -9.731517255  | 3.413886233  | -1.945771199 |
| C60  | -10.743550592 | 4.469281798  | -1.606093494 |
| C61  | -11.844468556 | 4.445949065  | -0.771549739 |
| C62  | -11.661896906 | 6.424939700  | -1.752171595 |
| C63  | 2.350138322   | -4.612070081 | 8.279297768  |
| C64  | 3.645203904   | -5.400212263 | 8.201996933  |
| C65  | 1.928591241   | -4.300433746 | 6.819917197  |
| C66  | 0.620349735   | -3.550464406 | 6.732413499  |
| C67  | -0.611223482  | -4.228428287 | 6.659574291  |
| C68  | 0.596735100   | -2.142696231 | 6.742488316  |
| C69  | -1.822069734  | -3.530480729 | 6.599650869  |
| C70  | -0.604258137  | -1.433309964 | 6.696293722  |
| C71  | -1.813557873  | -2.129707113 | 6.624165999  |
| C72  | 0.157397895   | 3.520469342  | 8.465743743  |
| C73  | -0.877924949  | 4.629008706  | 8.237139423  |
| C74  | 0.270589792   | 2.641697535  | 7.210399274  |
| C75  | -1.250877645  | 7.040169014  | 7.926428018  |
| C76  | -1.792043309  | 7.193534971  | 6.503113766  |
| C77  | -1.605975992  | 6.460631538  | 4.148115984  |
| C78  | -2.654081345  | 5.357732501  | 3.878438461  |
| C79  | -0.363414726  | 6.353525890  | 3.244369705  |
| C80  | -0.573812850  | 6.375950223  | 1.726426769  |
| C81  | -1.057431446  | 7.699298695  | 1.109246672  |
| C82  | -3.287600795  | 8.776648483  | 1.373584648  |
| C83  | -3.457587807  | 3.104639613  | 4.359185972  |
| C84  | -4.715867375  | 3.234223956  | 5.236962633  |
| C85  | -2.841349762  | 1.718628637  | 4.614871598  |
| C86  | -5.528698297  | 3.715145030  | 7.487793683  |
| C87  | -6.536637688  | 4.830984114  | 7.748788941  |
| C88  | -7.350533435  | 7.071644861  | 7.145850099  |
| C89  | -8.776759276  | 6.975161916  | 6.565477511  |
| C90  | -6.642282739  | 8.360759221  | 6.680749651  |
| C91  | -6.436708896  | 8.395465703  | 5.171225427  |
| C92  | -10.260285955 | 5.829166778  | 4.979774473  |
| C93  | -11.385038265 | 5.493159047  | 5.953382930  |
| C94  | -10.150899273 | 4.725384478  | 3.896774884  |
| C95  | -9.141137491  | 5.086045096  | 2.832044339  |
| C96  | -9.494844803  | 5.945542116  | 1.779961381  |
| C97  | -7.812746135  | 4.637250003  | 2.903755600  |
| C98  | -8.551343706  | 6.368384567  | 0.841041837  |
| C99  | -6.848052609  | 5.067077114  | 1.986891687  |
| C100 | -7.230535244  | 5.935202648  | 0.966687717  |
| C101 | 9.740248890   | 4.284660321  | -1.057910169 |
| C102 | 8.472753832   | 4.304626576  | -1.895775836 |
| C103 | 5.991396571   | 4.355265589  | -1.817025394 |
| C104 | 5.167400708   | 5.603954633  | -1.484052110 |
| C105 | 3.907037096   | 6.773727296  | 0.259022359  |
| C106 | 4.028370849   | 7.165260276  | 1.729531919  |
| C107 | 4.881534427   | 6.687095202  | 3.974722283  |
| C108 | 6.193304089   | 7.323012909  | 4.383350470  |
| C109 | 5.484867401   | 6.079834534  | -6.007274191 |

|       |              |              |               |
|-------|--------------|--------------|---------------|
| C110  | 4.065501581  | 6.653595609  | -6.081931064  |
| C111  | 5.397881602  | 4.548219588  | -5.806412431  |
| C112  | 6.745480798  | 3.864543462  | -6.101025059  |
| C113  | 6.734409331  | 2.433989042  | -5.611640829  |
| C114  | 2.078140625  | 7.375429792  | -4.852642987  |
| C115  | 1.943843702  | 8.495980766  | -3.839501238  |
| C116  | 1.007682289  | 6.263741886  | -4.737120744  |
| C117  | 1.304241497  | 5.297838464  | -3.619492343  |
| C118  | 0.955542090  | 5.597692807  | -2.292364729  |
| C119  | 2.041559623  | 4.127672839  | -3.874418802  |
| C120  | 1.379104954  | 4.769451479  | -1.247252551  |
| C121  | 2.461008359  | 3.299520784  | -2.828301618  |
| C122  | 2.147457993  | 3.630579673  | -1.508306062  |
| C123  | 10.866974511 | -1.650444939 | 1.272594696   |
| C124  | 11.079722226 | -2.802938476 | 2.269157671   |
| C125  | 10.079318982 | -2.074878428 | 0.023296356   |
| C126  | 9.668013495  | -0.964099018 | -0.894800798  |
| C127  | 10.483167986 | -0.208990506 | -1.713490558  |
| C128  | 8.368051198  | 0.326618047  | -2.087873370  |
| C129  | 11.621972080 | -5.141256194 | 2.681333538   |
| C130  | 12.689500153 | -4.820712743 | 3.704425196   |
| C131  | 4.324849665  | -3.858541545 | -3.885049881  |
| C132  | 4.939634006  | -4.243368360 | -2.570090978  |
| C133  | 6.342461747  | -3.562496937 | -2.311390599  |
| C134  | 7.330069928  | -3.957073376 | -3.445239829  |
| C135  | 8.767715573  | -3.491177433 | -3.158442887  |
| C136  | 9.781987478  | -4.061643539 | -4.108738292  |
| C137  | 6.889343290  | -4.178963567 | -0.988239562  |
| C138  | 3.916149557  | 0.533059261  | 1.918153774   |
| Fe139 | 5.572574285  | 1.098073392  | 0.933769230   |
| Fe140 | 2.060192982  | 0.595173795  | 1.788955358   |
| Fe141 | 3.579863953  | 0.158066545  | 3.846780899   |
| Fe142 | 4.069629731  | 2.409316554  | 2.598268489   |
| Fe143 | 1.933389293  | 2.356888840  | 4.163119949   |
| Fe144 | 4.947957177  | -1.139091913 | 2.079231554   |
| Fe145 | 3.653858567  | -0.424183163 | -0.024901180  |
| H146  | 0.250766920  | -2.592252667 | -9.168563460  |
| H147  | 0.348756074  | -0.981512544 | -8.913684021  |
| H148  | -3.755537638 | -0.905799064 | -10.130102657 |
| H149  | -1.428095997 | -0.536275838 | -10.454691842 |
| H150  | -1.485131780 | -2.251016191 | -10.845754984 |
| H151  | -4.431688586 | -0.932514320 | -7.390603758  |
| H152  | -4.527839648 | -3.676848871 | -9.681997003  |
| H153  | -5.578227221 | -1.057253154 | -8.749078738  |
| H154  | -5.065956366 | -5.904899069 | -9.296491128  |
| H155  | -2.660015619 | -4.605990668 | -8.054755286  |
| H156  | -6.122451972 | -5.401284558 | -7.958950285  |
| H157  | -1.952441298 | -3.168182951 | -3.133438227  |
| H158  | -2.483347421 | -3.268402821 | -5.958597038  |
| H159  | -0.877484998 | -5.436141808 | -6.804822200  |
| H160  | -6.528890837 | -4.098472237 | -2.402556674  |
| H161  | -5.021385334 | -3.947798064 | -4.891009165  |
| H162  | -1.857434773 | -6.830449907 | -6.279978239  |
| H163  | -2.976675515 | -2.046017897 | -4.064129033  |
| H164  | -5.165534670 | -6.653371986 | -4.601326487  |
| H165  | -7.039791276 | -4.676824131 | -4.008276311  |
| H166  | -0.181282687 | -5.277040678 | -1.806769039  |
| H167  | 0.219560096  | -3.588516625 | -1.421373185  |
| H168  | 0.815958228  | -4.888870614 | -0.371609434  |
| H169  | -2.134693848 | -4.105823993 | -0.765688166  |
| H170  | -5.356963603 | -8.934012392 | -4.384151597  |
| H171  | -4.714663629 | -2.738161384 | 0.824625493   |
| H172  | -6.032123173 | -6.974745920 | 0.228767614   |
| H173  | -7.981941579 | -5.144734526 | 2.422724439   |
| H174  | -0.930685443 | -2.394959920 | 0.503339587   |
| H175  | -0.245204128 | -3.593855743 | 1.604995837   |
| H176  | 1.583105946  | -5.278332339 | 8.719144457   |
| H177  | -6.322096021 | -2.044948912 | 1.149515247   |
| H178  | -8.164660725 | -3.406726331 | 2.089099372   |
| H179  | -5.253216705 | -2.480796009 | 2.505489766   |
| H180  | -7.188250327 | -3.952693791 | 3.475542429   |
| H181  | -6.521838544 | -4.458532378 | 0.515154342   |
| H182  | -4.791226710 | -4.918301389 | 3.001752252   |

|      |               |              |              |
|------|---------------|--------------|--------------|
| H183 | -4.163816778  | -4.974628544 | 0.147673252  |
| H184 | -1.999140896  | -3.268900608 | 1.613887559  |
| H185 | -1.837930225  | 1.692976084  | 4.159684684  |
| H186 | -3.477246550  | 0.977047011  | 4.107005658  |
| H187 | -2.870693989  | 0.481766730  | 6.138470893  |
| H188 | -3.743804044  | -1.977100951 | 6.473456198  |
| H189 | -0.602697461  | -0.342767671 | 6.683874823  |
| H190 | 1.536987244   | -1.585686216 | 6.758349940  |
| H191 | -0.628787128  | -5.321898149 | 6.644372065  |
| H192 | -2.778370922  | -6.500832358 | -1.256747798 |
| H193 | -0.953067490  | -8.633660638 | -2.812654519 |
| H194 | -1.913922566  | -9.717533283 | -1.781631426 |
| H195 | -2.941081097  | -7.442412184 | -3.390201153 |
| H196 | -6.269483966  | -8.730665790 | -2.869722899 |
| H197 | -2.768790494  | -4.072464741 | 6.528684218  |
| H198 | -0.843914037  | -6.252195779 | 0.987225522  |
| H199 | -7.814589099  | -8.535104900 | 1.731039820  |
| H200 | -6.828962618  | -9.125652447 | 0.367907979  |
| H201 | -4.909157429  | -9.365827339 | 2.310905966  |
| H202 | 8.300450375   | -9.903543351 | 4.833414561  |
| H203 | 4.489164017   | 0.431503479  | -5.523714701 |
| H204 | 5.117676212   | -5.449765421 | -4.638816286 |
| H205 | 6.917684161   | 3.856318450  | -7.186775662 |
| H206 | 7.564869892   | 4.422384316  | -5.626125304 |
| H207 | 4.628801481   | 4.116293673  | -6.465842305 |
| H208 | 2.879088046   | 9.086901755  | -3.688370844 |
| H209 | 5.897057999   | 6.259290193  | -7.012617976 |
| H210 | 0.390313387   | 1.560260548  | -4.205665016 |
| H211 | 0.885504643   | -0.871762997 | -5.995270890 |
| H212 | 3.927346954   | 6.690940799  | -4.005999084 |
| H213 | 1.922169198   | 7.874165058  | -5.829424864 |
| H214 | 6.067742401   | 6.604470550  | -4.084977564 |
| H215 | 3.673846184   | -0.887109490 | -4.686083193 |
| H216 | 5.076522732   | 4.344351393  | -4.773359485 |
| H217 | 7.300798558   | 6.554841695  | -5.176310703 |
| H218 | -0.699275740  | 1.854873408  | -7.693312485 |
| H219 | -0.564845705  | 0.093369780  | -3.938991865 |
| H220 | 7.735801911   | 3.036868759  | -4.029557479 |
| H221 | 1.453179634   | -0.927760435 | -4.330669497 |
| H222 | -5.481809794  | -0.111538154 | -0.489342180 |
| H223 | -2.714096225  | -0.072572103 | -1.081710952 |
| H224 | -7.438755417  | -0.721958793 | -4.849690092 |
| H225 | -4.971489690  | 0.926925509  | -5.197387998 |
| H226 | -7.646276933  | 2.095923593  | -2.160851874 |
| H227 | -12.249372835 | 3.686051926  | -0.112977043 |
| H228 | -10.197897545 | 0.541585881  | -1.144654217 |
| H229 | -10.098921712 | 2.768789611  | -2.764123808 |
| H230 | -9.066649248  | 3.119775926  | 0.120035003  |
| H231 | -11.898781665 | 7.451730346  | -2.017948102 |
| H232 | -5.126624528  | 2.101569936  | 0.583586063  |
| H233 | -5.408638391  | 2.940151157  | -0.943041789 |
| H234 | -13.235738864 | 6.024976706  | -0.376576428 |
| H235 | -8.855614480  | 3.948484490  | -2.345448010 |
| H236 | -5.123699769  | 1.192107202  | -2.970838116 |
| H237 | -5.797298617  | -1.368589454 | -4.795026708 |
| H238 | -6.924798403  | 3.489596540  | -6.517192154 |
| H239 | -0.673654987  | 3.639450459  | -0.940342467 |
| H240 | -6.183128302  | 2.481601118  | -7.773089902 |
| H241 | 2.644915831   | -3.595441075 | 10.031979819 |
| H242 | 1.778480282   | -2.757900604 | 8.929114771  |
| H243 | -1.581975389  | 3.972825040  | 4.998338313  |
| H244 | -3.806998908  | 3.138699926  | 3.316349527  |
| H245 | -3.614258180  | 4.140776814  | 6.707518704  |
| H246 | -3.196397022  | 4.150711187  | -0.609287333 |
| H247 | -3.734684687  | 5.905046466  | -1.617299397 |
| H248 | -4.744615324  | 5.817366555  | -0.400779670 |
| H249 | -1.869896917  | 5.235628913  | -3.784705306 |
| H250 | -2.803389583  | 5.768673236  | -5.216966012 |
| H251 | -5.689435760  | 8.447233374  | 7.222954407  |
| H252 | -7.279418332  | 9.210357060  | 6.959868296  |
| H253 | -4.371466892  | 7.987635782  | 5.354342451  |
| H254 | -5.039651980  | 8.011498485  | 3.734614830  |
| H255 | -3.388054849  | 10.655278466 | 2.176644221  |

|      |               |               |              |
|------|---------------|---------------|--------------|
| H256 | -0.610252756  | 7.831159052   | 0.111951685  |
| H257 | -8.847632534  | 7.027625150   | 0.021246395  |
| H258 | -7.503354762  | 3.937952552   | 3.684734943  |
| H259 | -5.060815733  | 7.781145772   | 1.022680029  |
| H260 | 0.171942013   | 5.423134838   | 3.492036347  |
| H261 | -0.443195448  | 5.800019732   | 5.814284607  |
| H262 | -1.231342289  | 5.550968337   | 1.408814334  |
| H263 | -4.077431329  | 2.679692317   | -6.688546593 |
| H264 | -0.698031198  | 7.954997337   | 8.178024695  |
| H265 | -1.558619174  | 3.420335856   | -5.798609646 |
| H266 | 0.308070959   | 7.182600134   | 3.521039721  |
| H267 | -5.806005097  | 4.761049497   | 2.098684390  |
| H268 | -4.675917586  | 5.581736849   | -3.628277702 |
| H269 | -2.128569970  | 6.986996551   | 8.586326753  |
| H270 | -1.826341716  | 10.205202338  | 1.594577702  |
| H271 | -5.208592024  | 9.469901831   | 1.343919947  |
| H272 | 0.637875203   | 1.973727742   | -6.695044031 |
| H273 | -1.330515770  | 0.141185598   | -6.301838590 |
| H274 | -10.524450590 | 6.298483982   | 1.689538812  |
| H275 | -3.414964605  | 3.296434183   | -3.500245356 |
| H276 | -2.130147438  | 7.407696618   | 3.963422594  |
| H277 | -0.709751953  | 8.536032958   | 1.728671389  |
| H278 | 0.414108245   | 6.166585759   | 1.291633746  |
| H279 | -2.975039582  | 6.994382744   | 0.457379453  |
| H280 | -6.117068274  | 2.807084361   | 7.285840692  |
| H281 | -5.773483554  | 5.936993736   | 6.201726911  |
| H282 | -7.494052623  | 7.135804084   | 8.234661057  |
| H283 | -4.983111564  | 3.559173655   | 8.428932753  |
| H284 | -8.205259238  | 5.387747602   | 5.417434058  |
| H285 | 9.566083586   | 4.793092160   | -0.098605816 |
| H286 | 9.922421796   | 3.214943758   | -0.822121513 |
| H287 | 10.277464944  | -0.900354884  | 1.820084747  |
| H288 | 11.716225733  | 4.712411821   | -1.294982289 |
| H289 | 10.905766154  | 4.529485285   | -2.707426474 |
| H290 | 1.068280636   | 1.905457137   | 7.370123143  |
| H291 | -1.159748171  | 2.350792057   | 9.497809881  |
| H292 | 0.618229831   | 6.039772744   | 8.209834987  |
| H293 | -0.682344244  | 2.118824107   | 7.050811396  |
| H294 | -0.186739351  | 3.231658554   | 10.471577644 |
| H295 | 4.722357200   | 5.765302890   | 4.555645134  |
| H296 | 1.139915006   | 3.974394815   | 8.669811374  |
| H297 | 4.066260370   | -8.872958414  | 0.798456233  |
| H298 | 7.035627932   | -8.128289215  | 0.990151487  |
| H299 | 5.194677669   | 5.511678822   | 2.229519573  |
| H300 | 1.058200961   | -3.372900612  | 4.190083180  |
| H301 | 4.170429888   | 7.657623895   | -0.337514522 |
| H302 | 3.044932592   | 2.399881573   | -3.033870681 |
| H303 | 2.836096118   | 6.586464833   | 0.079128693  |
| H304 | 2.487517470   | -6.791434571  | 1.431129474  |
| H305 | 4.828296001   | 4.803425335   | 0.362071838  |
| H306 | 3.593718592   | -5.729296822  | 0.562183842  |
| H307 | 4.915274168   | -7.630463458  | -0.145818543 |
| H308 | 5.465428686   | -6.439637646  | 2.074215410  |
| H309 | 4.377392366   | -7.577063736  | 2.888149036  |
| H310 | 0.977975669   | 5.734770088   | -5.700777063 |
| H311 | 5.739047871   | -10.542936385 | -0.230344349 |
| H312 | 7.309841743   | -10.499106794 | -2.873953675 |
| H313 | 2.489868521   | 3.013091855   | -0.676382379 |
| H314 | 6.690435432   | -12.727613071 | -1.096847813 |
| H315 | 6.063413341   | -12.355598309 | -2.563352720 |
| H316 | 3.897917445   | -4.398866029  | 2.548142003  |
| H317 | 1.126424248   | 5.001898631   | -0.211025393 |
| H318 | 2.294088679   | 3.859326262   | -4.902621223 |
| H319 | 10.870188369  | -6.228786066  | -0.690464287 |
| H320 | 10.693510315  | -2.784846108  | -0.558847062 |
| H321 | 8.490472353   | -6.093629981  | -0.165100251 |
| H322 | 11.428835298  | -5.553899899  | -1.962625817 |
| H323 | 6.806103226   | 7.725190585   | 3.539821805  |
| H324 | 6.929559577   | -4.061114359  | 1.655634353  |
| H325 | 5.056010255   | -5.334079092  | -2.490710616 |
| H326 | 7.335418313   | 4.333117089   | -0.187570754 |
| H327 | 7.316090825   | -5.052551843  | -3.559565946 |
| H328 | 9.924579348   | 1.243802819   | -3.186831109 |

|       |               |               |              |
|-------|---------------|---------------|--------------|
| H329  | 7.501753646   | 0.796195167   | -2.535319070 |
| H330  | 8.463376213   | -11.447741502 | -1.926677863 |
| H331  | 2.598393290   | -2.878113235  | 3.543225263  |
| H332  | 7.904370034   | -5.877625032  | 2.890531316  |
| H333  | 6.547493686   | -3.661608743  | 3.108831353  |
| H334  | 7.587876806   | -8.230576064  | 3.114038885  |
| H335  | 1.170789831   | -6.681381436  | 3.028704319  |
| H336  | 10.260869022  | -4.126747754  | -5.937116571 |
| H337  | 8.799644378   | -2.392631892  | -3.211478508 |
| H338  | 9.079222646   | -3.792185794  | -2.151840636 |
| H339  | 6.982227906   | -3.504045888  | -4.385027799 |
| H340  | 5.477282574   | 3.443770738   | -1.471890438 |
| H341  | 0.371399020   | 6.497340691   | -2.083598660 |
| H342  | 0.037000502   | 6.762584314   | -4.590853198 |
| H343  | 4.276353665   | -3.892227707  | -1.769275881 |
| H344  | 8.843484619   | -6.674375506  | 1.942312245  |
| H345  | 9.017144759   | -7.553792536  | -0.135866124 |
| H346  | 0.076433747   | -5.427387565  | 3.482695946  |
| H347  | 11.560195165  | -0.192450514  | -1.834057441 |
| H348  | 9.177571728   | -2.615194949  | 0.335079480  |
| H349  | 6.117131424   | 4.310183062   | -2.901388110 |
| H350  | 4.074020084   | 7.392343859   | 4.230827107  |
| H351  | 1.850309933   | -5.260705675  | 6.287024507  |
| H352  | 2.729653884   | -3.713577390  | 6.342907597  |
| H353  | 12.612578692  | -0.688169820  | 1.761699196  |
| H354  | 12.781443177  | -1.738513733  | 0.519233471  |
| H355  | 11.987165681  | -5.992507103  | 2.085199389  |
| H356  | 11.375625988  | -4.233430850  | 0.770255727  |
| H357  | 13.432842144  | -4.051877020  | 3.379994271  |
| H358  | 10.697938551  | -5.463045506  | 3.188089062  |
| H359  | 4.561095472   | -4.765052640  | 8.121508653  |
| H360  | -11.057806459 | 5.019430924   | 6.908527939  |
| H361  | 6.760369847   | -10.753648081 | 4.534296819  |
| H362  | 5.688373548   | -8.382246943  | 5.414620491  |
| H363  | -10.525496230 | 6.782934754   | 4.493869902  |
| H364  | -9.877443800  | 3.773299224   | 4.377699304  |
| H365  | -11.151045467 | 4.599264214   | 3.456533685  |
| H366  | 3.223903489   | -1.142076058  | -1.273576635 |
| H367  | -6.666102572  | 6.890902112   | -0.637062255 |
| H368  | 1.974640567   | -0.913516556  | 1.754148715  |
| H369  | 0.933419324   | -0.909302316  | -0.470422227 |
| H370  | -0.412020880  | 1.133666982   | -1.081214478 |
| Mo371 | 6.177984388   | -1.288401757  | -0.328213530 |
| N372  | 0.115975663   | -1.683749393  | -9.620582514 |
| N373  | -3.598475797  | -1.423041586  | -9.269343907 |
| N374  | -4.855682873  | -3.909755152  | -8.747567154 |
| N375  | -2.860073577  | -5.388739533  | -7.434270068 |
| N376  | -2.481837922  | -3.791310714  | -5.080854378 |
| N377  | -5.043080326  | -4.108760172  | -3.882036311 |
| N378  | -5.431615137  | -6.984873552  | -3.670280339 |
| N379  | -3.010083937  | -8.226791369  | -2.734560489 |
| N380  | -2.050949238  | -6.755544647  | -0.592653656 |
| N381  | -4.046228869  | -5.317192571  | 1.101465921  |
| N382  | -6.129755443  | -7.348794482  | 1.176149573  |
| N383  | 6.366457670   | -11.950149330 | -1.676549774 |
| N384  | 6.426941141   | -9.798107448  | -0.071578578 |
| N385  | 3.174753433   | -5.123360389  | 2.512946573  |
| N386  | 0.980277862   | -5.687666611  | 3.098129709  |
| N387  | 1.800377738   | -3.549302590  | 3.515610505  |
| N388  | 7.070526624   | -9.117706425  | 3.299986338  |
| N389  | -0.395893813  | 2.035418014   | -6.734480157 |
| N390  | 3.619311515   | -0.027093698  | -5.235498256 |
| N391  | -2.320754817  | 3.010463108   | -5.233408782 |
| N392  | -4.904689268  | 3.039845054   | -6.218962517 |
| N393  | -5.964698683  | 0.677654741   | -5.250579845 |
| N394  | -5.817639521  | 0.682801409   | -2.424379713 |
| N395  | -2.790637288  | 3.184294332   | -0.745324493 |
| N396  | -1.355538641  | 1.602113966   | -1.091212121 |
| N397  | -7.989305709  | 1.900901580   | -1.223369599 |
| N398  | -10.641926260 | 5.711601795   | -2.213663382 |
| N399  | -12.411715963 | 5.699470574   | -0.875706891 |
| N400  | 2.585009162   | -3.379690870  | 9.033853448  |
| N401  | -0.192714724  | 2.670627418   | 9.614533391  |

|      |               |               |              |
|------|---------------|---------------|--------------|
| N402 | -0.387225715  | 5.898813151   | 8.156463744  |
| N403 | -1.165521864  | 6.484350802   | 5.540384265  |
| N404 | -2.516396842  | 7.773930485   | 0.961751721  |
| N405 | -2.763211218  | 9.920423922   | 1.860129984  |
| N406 | -4.634390179  | 8.632041004   | 1.394656644  |
| N407 | -2.495175643  | 4.184935769   | 4.547585139  |
| N408 | -4.568941613  | 3.912755892   | 6.412621555  |
| N409 | -6.525228287  | 5.893784865   | 6.890562976  |
| N410 | -5.193628563  | 8.054857052   | 4.740962152  |
| N411 | -8.996349437  | 5.968468019   | 5.684893344  |
| N412 | 10.840001293  | 4.938890106   | -1.770917202 |
| N413 | 7.316751859   | 4.414344121   | -1.210530226 |
| N414 | 4.701384076   | 5.655771201   | -0.218836961 |
| N415 | 4.801224343   | 6.405503149   | 2.551190968  |
| N416 | 6.321330620   | 6.822861154   | -5.056611862 |
| N417 | 3.449293383   | 6.899116503   | -4.889827663 |
| N418 | 12.155368493  | -1.026609229  | 0.909963599  |
| N419 | 8.341644533   | -0.605362525  | -1.139925988 |
| N420 | 9.645184119   | 0.592120058   | -2.459327594 |
| N421 | 11.391567859  | -4.031508152  | 1.769489717  |
| N422 | -1.793824236  | -0.180602775  | 1.881131695  |
| N423 | -1.185989437  | 0.747929419   | 1.934164267  |
| O424 | -2.059716317  | -2.326839338  | -7.852789816 |
| O425 | -5.435360629  | -3.125756055  | -6.688532703 |
| O426 | -4.492623335  | -6.704160003  | -6.526557375 |
| O427 | -2.002858721  | -5.745452641  | -4.012650596 |
| O428 | -4.048434015  | -3.750405894  | -1.863461820 |
| O429 | -6.440613497  | -6.501410049  | -1.675876894 |
| O430 | -4.288884333  | -9.943868558  | -1.911547247 |
| O431 | -0.375338806  | -8.277569597  | -0.188906191 |
| O432 | -2.596872579  | -6.052368153  | 2.704851029  |
| O433 | -6.040029152  | -7.024091193  | 3.421852836  |
| O434 | -6.522395431  | -10.480080904 | 2.882219278  |
| O435 | 8.508572083   | -9.117367677  | -0.822771264 |
| O436 | 5.585443528   | -10.674860072 | 2.493708440  |
| O437 | 6.916003331   | -9.085027929  | 6.884495739  |
| O438 | -3.073583563  | 0.962437991   | -4.524597495 |
| O439 | 2.372464222   | 1.586621247   | -6.242702327 |
| O440 | -5.655548303  | 4.268017652   | -4.440304095 |
| O441 | -3.772700331  | 5.901617617   | -3.368426144 |
| O442 | -8.011992727  | 1.145084554   | -6.186496063 |
| O443 | -7.074501233  | -1.220262271  | -2.334397416 |
| O444 | -7.581657998  | 0.752385263   | 0.711381604  |
| O445 | -11.118378771 | 1.524001268   | 0.387099566  |
| O446 | 3.709698246   | -6.621191166  | 8.200851457  |
| O447 | -2.975573939  | -1.384217311  | 6.567411190  |
| O448 | -2.096199853  | 4.391539185   | 8.142375775  |
| O449 | -2.743233877  | 7.976672770   | 6.300444415  |
| O450 | -3.593811915  | 5.572327769   | 3.091674016  |
| O451 | -5.774004757  | 2.692226558   | 4.888628305  |
| O452 | -2.773204719  | 1.448690085   | 6.016427916  |
| O453 | -7.329622373  | 4.737337085   | 8.694041840  |
| O454 | -9.660242473  | 7.769143660   | 6.918751188  |
| O455 | -7.367924558  | 8.661154056   | 4.394335923  |
| O456 | -12.562702018 | 5.689881503   | 5.701275799  |
| O457 | -6.235907872  | 6.391067813   | 0.083237579  |
| O458 | 8.535994132   | 4.188563409   | -3.146634093 |
| O459 | 4.974322412   | 6.507546060   | -2.327612535 |
| O460 | 3.398650305   | 8.163239786   | 2.118021117  |
| O461 | 6.567376013   | 7.402935536   | 5.542390573  |
| O462 | 3.496168119   | 6.839185708   | -7.170510807 |
| O463 | 6.178556165   | 1.516857400   | -6.207991993 |
| O464 | 7.342293324   | 2.200542761   | -4.432854139 |
| O465 | 0.910530270   | 8.787426360   | -3.253696826 |
| O466 | 11.055036760  | -2.606018772  | 3.498626884  |
| O467 | 12.796482144  | -5.397445952  | 4.776841202  |
| O468 | 3.640672134   | -2.866274618  | -4.091759160 |
| O469 | 4.570139514   | -4.699775742  | -4.941990503 |
| O470 | 10.728002401  | -4.781456624  | -3.796152068 |
| O471 | 9.557796853   | -3.703538452  | -5.399634589 |
| O472 | 7.118534519   | -3.335494189  | -0.035830003 |
| O473 | 7.118006142   | -5.409408021  | -0.920447967 |
| O474 | 6.205471442   | -2.192900352  | -2.216573953 |

|      |              |              |              |
|------|--------------|--------------|--------------|
| O475 | 8.476877230  | -6.684241478 | 2.866010793  |
| O476 | 6.774593422  | -4.437982481 | 2.559202224  |
| O477 | -3.785466844 | 5.758312378  | -0.632205998 |
| O478 | 11.719263595 | -5.938386335 | -1.109750402 |
| O479 | 9.252291209  | -6.643138328 | 0.180373327  |
| S480 | 0.648546358  | 3.613591590  | 5.676578817  |
| S481 | 1.971719334  | 3.060086533  | 2.028906974  |
| S482 | 5.160994654  | 0.679041410  | -1.237783144 |
| S483 | 1.312530124  | 0.141668238  | 3.884345881  |
| S484 | 1.456244640  | 0.341158099  | -0.374133445 |
| S485 | 5.915191107  | 3.211544236  | 1.611927921  |
| S486 | 4.246027944  | -2.482934498 | 0.438710146  |
| S487 | 4.138444278  | 2.160127459  | 4.810354811  |
| S488 | 7.043638673  | -0.435932932 | 1.727604105  |
| S489 | 4.528458894  | -1.859218101 | 4.122536680  |

**Structure D 35(1)**

|            |              |                               |                                         |
|------------|--------------|-------------------------------|-----------------------------------------|
| D 35(1)    |              | bm2cnx2b6x2hn2n2xd135tf.car 2 |                                         |
| associated |              | C1                            | -2.331627540 -1.789287460 -8.963776554  |
| Fe( 139)   | 0.558 -2.516 | C2                            | -1.272068000 -1.532810939 -10.040852260 |
| Fe( 140)   | 0.287 -0.041 | C3                            | -4.681225353 -1.503973385 -8.308892282  |
| Fe( 141)   | 0.551 -2.622 | C4                            | -5.013193864 -2.920703907 -7.845253825  |
| Fe( 142)   | 0.579 2.853  | C5                            | -5.104973711 -5.299148089 -8.388770889  |
| Fe( 143)   | 0.614 3.209  | C6                            | -4.123212126 -5.855238170 -7.353272905  |
| Fe( 144)   | 0.512 2.252  | C7                            | -1.858673385 -5.741672473 -6.425032997  |
| Fe( 145)   | 0.365 -1.824 | C8                            | -2.112221280 -5.091632212 -5.061114449  |
|            |              | C9                            | -2.793473044 -3.093759356 -3.836220288  |
|            |              | C10                           | -4.011672063 -3.674709782 -3.102536371  |
|            |              | C11                           | -6.217506296 -4.687833535 -3.265399151  |
|            |              | C12                           | -6.015552225 -6.131568154 -2.782134902  |
|            |              | C13                           | -5.366316463 -8.411025184 -3.407329210  |
|            |              | C14                           | -4.163632607 -8.922467831 -2.608009079  |
|            |              | C15                           | -1.774552326 -8.667552761 -2.099112613  |
|            |              | C16                           | -1.341714475 -7.883180865 -0.858153165  |
|            |              | C17                           | -1.722402730 -5.826256265 0.470567781   |
|            |              | C18                           | -2.825246287 -5.738449006 1.538836472   |
|            |              | C19                           | -1.318490068 -4.442623704 -0.114396696  |
|            |              | C20                           | -1.138218369 -3.372262866 0.965855253   |
|            |              | C21                           | -0.050968172 -4.568545712 -0.969428715  |
|            |              | C22                           | -5.191346838 -5.240618763 2.036937475   |
|            |              | C23                           | -5.827287035 -6.622164032 2.289349999   |
|            |              | C24                           | -6.218356186 -4.188203019 1.555335672   |
|            |              | C25                           | -7.461510442 -4.180463797 2.451446300   |
|            |              | C26                           | -5.581425936 -2.792569339 1.508462388   |
|            |              | C27                           | -6.798907148 -8.649021386 1.371394451   |
|            |              | C28                           | -6.013719854 -9.563094942 2.292491553   |
|            |              | C29                           | 7.459385539 -10.996452947 -1.908223899  |
|            |              | C30                           | 7.514740207 -9.878967865 -0.864114689   |
|            |              | C31                           | 6.212241719 -8.861021985 1.013961086    |
|            |              | C32                           | 6.253545161 -9.641521039 2.341723078    |
|            |              | C33                           | 4.869375841 -8.131611894 0.826349658    |
|            |              | C34                           | 4.579905910 -7.094921084 1.915008434    |
|            |              | C35                           | 3.397946903 -6.206327228 1.527963279    |
|            |              | C36                           | 1.989928051 -4.797723415 3.049147436    |
|            |              | C37                           | 7.237250027 -9.759246973 4.581446194    |
|            |              | C38                           | 6.567185666 -9.010852317 5.715227440    |
|            |              | C39                           | -0.997978802 1.058321542 -5.818121623   |
|            |              | C40                           | -2.241730145 1.652723100 -5.136262139   |
|            |              | C41                           | -0.004653871 0.651481488 -4.701243734   |
|            |              | C42                           | 1.183151573 -0.231698712 -5.138924263   |
|            |              | C43                           | 2.432511549 0.531526018 -5.575456845    |
|            |              | C44                           | -3.313004761 3.766765917 -4.495981406   |
|            |              | C45                           | -4.733077356 3.725945075 -5.078160553   |
|            |              | C46                           | -2.865646114 5.222683777 -4.261131334   |
|            |              | C47                           | -6.234024643 2.657464135 -6.695618000   |
|            |              | C48                           | -6.829933736 1.415645894 -6.014629815   |
|            |              | C49                           | -6.424115824 -0.501295717 -4.526330398  |
|            |              | C50                           | -6.471416466 -0.382633630 -3.001795882  |
|            |              | C51                           | -5.829242103 0.824755642 -0.967065684   |
|            |              | C52                           | -7.250203082 1.113953080 -0.423632017   |
|            |              | C53                           | -4.984952775 2.022404556 -0.504248101   |
|            |              | C54                           | -3.517335177 1.994757442 -0.779534100   |

|      |               |              |              |
|------|---------------|--------------|--------------|
| C55  | -2.601254263  | 0.993804189  | -0.991729603 |
| C56  | -1.487915145  | 2.913626366  | -0.914556170 |
| C57  | -9.250414600  | 2.524269999  | -0.805241448 |
| C58  | -10.273923360 | 1.436005946  | -0.489237447 |
| C59  | -9.741234461  | 3.417954428  | -1.966766198 |
| C60  | -10.744841723 | 4.478774024  | -1.622790073 |
| C61  | -11.828434274 | 4.462866915  | -0.765756130 |
| C62  | -11.662844394 | 6.434260498  | -1.765328872 |
| C63  | 2.338897655   | -4.609477624 | 8.279324188  |
| C64  | 3.633160821   | -5.397354565 | 8.197557862  |
| C65  | 1.908136121   | -4.306528760 | 6.821239864  |
| C66  | 0.599069885   | -3.557614322 | 6.738467627  |
| C67  | -0.632012630  | -4.235091537 | 6.656929434  |
| C68  | 0.574524974   | -2.150728986 | 6.760248884  |
| C69  | -1.842767073  | -3.537090962 | 6.596147603  |
| C70  | -0.625430941  | -1.440913710 | 6.712860708  |
| C71  | -1.834149230  | -2.136191538 | 6.629290008  |
| C72  | 0.158352209   | 3.525590543  | 8.461318747  |
| C73  | -0.877853917  | 4.634014442  | 8.235538163  |
| C74  | 0.289244095   | 2.655851999  | 7.201368730  |
| C75  | -1.250007686  | 7.047233942  | 7.935195623  |
| C76  | -1.789634148  | 7.200963965  | 6.511747187  |
| C77  | -1.600914243  | 6.465711930  | 4.157194788  |
| C78  | -2.646242884  | 5.361634291  | 3.886290756  |
| C79  | -0.356202712  | 6.359098999  | 3.256186338  |
| C80  | -0.565943577  | 6.381123938  | 1.739381795  |
| C81  | -1.051598812  | 7.702353583  | 1.119743353  |
| C82  | -3.285591659  | 8.776534228  | 1.355085742  |
| C83  | -3.440493274  | 3.103064373  | 4.355525363  |
| C84  | -4.702478033  | 3.234216038  | 5.228223114  |
| C85  | -2.826587531  | 1.715552661  | 4.610637823  |
| C86  | -5.523853786  | 3.712801009  | 7.478604391  |
| C87  | -6.535394640  | 4.824426684  | 7.738686125  |
| C88  | -7.347403414  | 7.067132960  | 7.141655735  |
| C89  | -8.777539414  | 6.973350475  | 6.568246867  |
| C90  | -6.639319821  | 8.357084089  | 6.676350805  |
| C91  | -6.432840525  | 8.389250512  | 5.166614043  |
| C92  | -10.272236189 | 5.837809119  | 4.985442395  |
| C93  | -11.390610913 | 5.495764417  | 5.962626150  |
| C94  | -10.161761372 | 4.732485996  | 3.901837848  |
| C95  | -9.150234774  | 5.089160162  | 2.835984785  |
| C96  | -9.500802428  | 5.955575311  | 1.788126449  |
| C97  | -7.824784450  | 4.628055734  | 2.900369773  |
| C98  | -8.557617962  | 6.375379362  | 0.848188494  |
| C99  | -6.860219680  | 5.055094332  | 1.980815795  |
| C100 | -7.240213207  | 5.931197856  | 0.965944080  |
| C101 | 9.727396979   | 4.277789139  | -1.050630538 |
| C102 | 8.462946522   | 4.306050325  | -1.890150070 |
| C103 | 5.983073639   | 4.354269304  | -1.816855578 |
| C104 | 5.159256725   | 5.601181859  | -1.480257631 |
| C105 | 3.894226017   | 6.759872040  | 0.264123760  |
| C106 | 4.021267790   | 7.154101817  | 1.732333344  |
| C107 | 4.874891269   | 6.673442706  | 3.975149866  |
| C108 | 6.182274435   | 7.318949758  | 4.384959131  |
| C109 | 5.487133233   | 6.081752219  | -6.006575861 |
| C110 | 4.070373097   | 6.661703584  | -6.087957837 |
| C111 | 5.396672482   | 4.550186333  | -5.804984744 |
| C112 | 6.742946476   | 3.864738683  | -6.101762926 |
| C113 | 6.734812799   | 2.436491384  | -5.604772564 |
| C114 | 2.069384090   | 7.367321366  | -4.867360006 |
| C115 | 1.931456215   | 8.487185030  | -3.855085565 |
| C116 | 1.001654143   | 6.251954701  | -4.753513251 |
| C117 | 1.290586719   | 5.302395657  | -3.621196439 |
| C118 | 0.917211061   | 5.615280866  | -2.303615692 |
| C119 | 2.040658962   | 4.134855113  | -3.850370996 |
| C120 | 1.333776136   | 4.806954456  | -1.240485862 |
| C121 | 2.454681069   | 3.327540248  | -2.785848569 |
| C122 | 2.121773494   | 3.675003735  | -1.474062066 |
| C123 | 10.868290135  | -1.651003413 | 1.271994865  |
| C124 | 11.076772138  | -2.803107209 | 2.268763129  |
| C125 | 10.085001337  | -2.081421367 | 0.021766406  |
| C126 | 9.672815543   | -0.973563748 | -0.897767107 |
| C127 | 10.491838563  | -0.224438271 | -1.717677017 |



|       |              |              |               |
|-------|--------------|--------------|---------------|
| C128  | 8.379376740  | 0.314911436  | -2.100473560  |
| C129  | 11.604430772 | -5.141424385 | 2.684837089   |
| C130  | 12.674322083 | -4.824611137 | 3.707002199   |
| C131  | 4.328253989  | -3.865075047 | -3.893816154  |
| C132  | 4.939477835  | -4.239469224 | -2.572612458  |
| C133  | 6.339436067  | -3.552258613 | -2.315061870  |
| C134  | 7.331842783  | -3.949538044 | -3.447414838  |
| C135  | 8.770306834  | -3.488003765 | -3.160068044  |
| C136  | 9.789820113  | -4.053575706 | -4.108793726  |
| C137  | 6.890065150  | -4.167169075 | -0.993804984  |
| C138  | 3.894588399  | 0.525497434  | 1.907451803   |
| Fe139 | 5.598612234  | 1.071656046  | 0.995381260   |
| Fe140 | 1.678069756  | 0.524541537  | 1.838244568   |
| Fe141 | 3.633273490  | 0.186659961  | 3.859604980   |
| Fe142 | 3.964466066  | 2.386159147  | 2.513308352   |
| Fe143 | 1.966246794  | 2.240706855  | 4.291923303   |
| Fe144 | 4.938815678  | -1.126156484 | 2.130640927   |
| Fe145 | 3.672672259  | -0.410545400 | -0.004330592  |
| H146  | 0.247949181  | -2.584020554 | -9.175028028  |
| H147  | 0.342685625  | -0.975417516 | -8.916572020  |
| H148  | -3.764458033 | -0.902713979 | -10.144654396 |
| H149  | -1.426754404 | -0.525790843 | -10.460095797 |
| H150  | -1.477480154 | -2.237150710 | -10.865289937 |
| H151  | -4.432407239 | -0.932695544 | -7.403819201  |
| H152  | -4.519717040 | -3.683680984 | -9.686513736  |
| H153  | -5.582578119 | -1.064142735 | -8.757098070  |
| H154  | -5.047997199 | -5.913308685 | -9.296852959  |
| H155  | -2.650692288 | -4.605615163 | -8.049200362  |
| H156  | -6.111489131 | -5.406168274 | -7.963754771  |
| H157  | -1.950005567 | -3.148659896 | -3.134642434  |
| H158  | -2.481765114 | -3.265045140 | -5.960060734  |
| H159  | -0.870047403 | -5.437867490 | -6.794741861  |
| H160  | -6.523249351 | -4.091819268 | -2.396876240  |
| H161  | -5.017166244 | -3.946104015 | -4.891373900  |
| H162  | -1.853712142 | -6.826995127 | -6.267030893  |
| H163  | -2.973596451 | -2.034229653 | -4.070829581  |
| H164  | -5.166457934 | -6.651442551 | -4.598024532  |
| H165  | -7.033256830 | -4.677053008 | -4.000946583  |
| H166  | -0.178270965 | -5.291641190 | -1.788100891  |
| H167  | 0.203875411  | -3.595465420 | -1.417808183  |
| H168  | 0.808420223  | -4.881802305 | -0.355278452  |
| H169  | -2.144547970 | -4.119773619 | -0.768954069  |
| H170  | -5.364489867 | -8.931097093 | -4.376394004  |
| H171  | -4.715184438 | -2.753314769 | 0.832528627   |
| H172  | -6.045139219 | -6.990026076 | 0.247912832   |
| H173  | -7.983400034 | -5.148246138 | 2.448906711   |
| H174  | -0.954150579 | -2.395676379 | 0.495318792   |
| H175  | -0.271534332 | -3.578340553 | 1.608437537   |
| H176  | 1.573789680  | -5.271171910 | 8.729448047   |
| H177  | -6.319745638 | -2.054525646 | 1.161778330   |
| H178  | -8.166912856 | -3.411396684 | 2.106029811   |
| H179  | -5.248279449 | -2.488916619 | 2.514434908   |
| H180  | -7.187741447 | -3.947347992 | 3.492741540   |
| H181  | -6.529619344 | -4.467411917 | 0.532013465   |
| H182  | -4.794612182 | -4.932348363 | 3.014942909   |
| H183  | -4.183797444 | -5.010920240 | 0.154149250   |
| H184  | -2.025753365 | -3.262989652 | 1.606120633   |
| H185  | -1.826107187 | 1.681448775  | 4.147614980   |
| H186  | -3.467162157 | 0.973404281  | 4.110120530   |
| H187  | -2.878364878 | 0.489887673  | 6.145291438   |
| H188  | -3.763100209 | -1.979025945 | 6.464368871   |
| H189  | -0.622579795 | -0.350629835 | 6.703625241   |
| H190  | 1.514017466  | -1.594072186 | 6.781026500   |
| H191  | -0.649561689 | -5.328253799 | 6.634302252   |
| H192  | -2.789407804 | -6.511207074 | -1.257006538  |
| H193  | -0.942397396 | -8.617068627 | -2.817046501  |
| H194  | -1.900264898 | -9.715959296 | -1.797412168  |
| H195  | -2.936524286 | -7.432204032 | -3.386222307  |
| H196  | -6.261125536 | -8.720994634 | -2.853035516  |
| H197  | -2.789090942 | -4.078848302 | 6.517710259   |
| H198  | -0.859804492 | -6.265580388 | 0.987417949   |
| H199  | -7.827891010 | -8.553845193 | 1.752439555   |
| H200  | -6.841651777 | -9.141321248 | 0.387129644   |

|      |               |              |              |
|------|---------------|--------------|--------------|
| H201 | -4.916289593  | -9.370501940 | 2.323006150  |
| H202 | 8.301458201   | -9.904663271 | 4.819309998  |
| H203 | 4.479885851   | 0.441652470  | -5.514367493 |
| H204 | 5.126162644   | -5.458349661 | -4.633145247 |
| H205 | 6.913148625   | 3.852073003  | -7.188232671 |
| H206 | 7.563004824   | 4.424210260  | -5.629814072 |
| H207 | 4.625523200   | 4.121412046  | -6.463819891 |
| H208 | 2.867073297   | 9.075226588  | -3.696935099 |
| H209 | 5.904467259   | 6.260399695  | -7.009140667 |
| H210 | 0.368850826   | 1.569374153  | -4.218351582 |
| H211 | 0.883700480   | -0.875684061 | -5.984170338 |
| H212 | 3.911121298   | 6.668539112  | -4.014820680 |
| H213 | 1.918330544   | 7.865220198  | -5.845698650 |
| H214 | 6.060159770   | 6.609760153  | -4.081562447 |
| H215 | 3.668552572   | -0.880931600 | -4.682877004 |
| H216 | 5.076224045   | 4.347433431  | -4.771320152 |
| H217 | 7.298572187   | 6.552532821  | -5.164638433 |
| H218 | -0.707449654  | 1.847458447  | -7.706653624 |
| H219 | -0.580457544  | 0.099158963  | -3.943899828 |
| H220 | 7.739346605   | 3.050516576  | -4.028590526 |
| H221 | 1.443083352   | -0.914923604 | -4.317915113 |
| H222 | -5.496046943  | -0.106434679 | -0.485421309 |
| H223 | -2.721342478  | -0.081021522 | -1.067858164 |
| H224 | -7.448082603  | -0.726420330 | -4.850365123 |
| H225 | -4.983011512  | 0.922872605  | -5.196879878 |
| H226 | -7.649401211  | 2.107164465  | -2.167068866 |
| H227 | -12.219273672 | 3.706613347  | -0.094683691 |
| H228 | -10.201608559 | 0.540280311  | -1.153206225 |
| H229 | -10.111962793 | 2.775379100  | -2.785331486 |
| H230 | -9.086400846  | 3.129485408  | 0.100516697  |
| H231 | -11.903728054 | 7.459700919  | -2.033345973 |
| H232 | -5.130588142  | 2.100316627  | 0.585725532  |
| H233 | -5.409640231  | 2.940167368  | -0.942783729 |
| H234 | -13.208803885 | 6.045306180  | -0.353711171 |
| H235 | -8.861075115  | 3.945398005  | -2.365866438 |
| H236 | -5.109889008  | 1.171728816  | -2.964604391 |
| H237 | -5.807484499  | -1.374186545 | -4.788727207 |
| H238 | -6.935561084  | 3.483807441  | -6.522457494 |
| H239 | -0.670504809  | 3.627599394  | -0.930621102 |
| H240 | -6.192697651  | 2.473756623  | -7.777708417 |
| H241 | 2.647644132   | -3.579997312 | 10.023886017 |
| H242 | 1.774528161   | -2.749075265 | 8.920649021  |
| H243 | -1.564220399  | 3.973446162  | 4.988665669  |
| H244 | -3.785012196  | 3.134752624  | 3.311741449  |
| H245 | -3.606311849  | 4.137677246  | 6.704947602  |
| H246 | -3.191106279  | 4.145578836  | -0.610850256 |
| H247 | -3.744181283  | 5.915432441  | -1.625291493 |
| H248 | -4.753617289  | 5.818045079  | -0.408414568 |
| H249 | -1.874196545  | 5.223694733  | -3.788630827 |
| H250 | -2.802066679  | 5.759537312  | -5.222788573 |
| H251 | -5.686404937  | 8.444037469  | 7.218777574  |
| H252 | -7.277809812  | 9.206607548  | 6.954112514  |
| H253 | -4.364071254  | 8.003783001  | 5.355921167  |
| H254 | -5.028074676  | 8.018581991  | 3.733385619  |
| H255 | -3.391512268  | 10.664046356 | 2.141207798  |
| H256 | -0.597734240  | 7.839821632  | 0.126010086  |
| H257 | -8.850016349  | 7.040933362  | 0.032680888  |
| H258 | -7.515002879  | 3.922898172  | 3.677247181  |
| H259 | -5.056389029  | 7.770138131  | 1.020911746  |
| H260 | 0.176037781   | 5.425270536  | 3.498119039  |
| H261 | -0.433040676  | 5.816211838  | 5.824009002  |
| H262 | -1.218851228  | 5.553031734  | 1.421756698  |
| H263 | -4.087591466  | 2.665653116  | -6.688252075 |
| H264 | -0.697226301  | 7.961980389  | 8.188877638  |
| H265 | -1.573097110  | 3.413655420  | -5.805525390 |
| H266 | 0.316524240   | 7.187386385  | 3.535245836  |
| H267 | -5.820636902  | 4.736910831  | 2.084571491  |
| H268 | -4.678251037  | 5.583415172  | -3.639437518 |
| H269 | -2.127245456  | 6.992819939  | 8.595743840  |
| H270 | -1.828911551  | 10.214148265 | 1.556613058  |
| H271 | -5.208718225  | 9.461518684  | 1.316332849  |
| H272 | 0.623741402   | 1.970610487  | -6.700951747 |
| H273 | -1.342734518  | 0.130900016  | -6.312467365 |

|      |               |               |              |
|------|---------------|---------------|--------------|
| H274 | -10.527304961 | 6.317306962   | 1.702562111  |
| H275 | -3.427176024  | 3.294957216   | -3.504928885 |
| H276 | -2.126713453  | 7.412008115   | 3.972888446  |
| H277 | -0.713191193  | 8.540717932   | 1.742448291  |
| H278 | 0.422364843   | 6.171429871   | 1.308334418  |
| H279 | -2.965423118  | 6.986868948   | 0.459940476  |
| H280 | -6.108008573  | 2.802885227   | 7.274406751  |
| H281 | -5.765972551  | 5.936952755   | 6.199980979  |
| H282 | -7.489392605  | 7.131344590   | 8.230805471  |
| H283 | -4.979465659  | 3.557157938   | 8.420574106  |
| H284 | -8.213121408  | 5.401119732   | 5.398005090  |
| H285 | 9.551473618   | 4.776031069   | -0.086941256 |
| H286 | 9.913448874   | 3.206731485   | -0.826389196 |
| H287 | 10.274065429  | -0.901240222  | 1.815041204  |
| H288 | 11.703063054  | 4.721013162   | -1.285871981 |
| H289 | 10.891642903  | 4.547558297   | -2.698299397 |
| H290 | 1.074244279   | 1.910152613   | 7.382232642  |
| H291 | -1.168406611  | 2.350993596   | 9.467833893  |
| H292 | 0.617580775   | 6.046588662   | 8.222490704  |
| H293 | -0.664265715  | 2.141332868   | 7.017228870  |
| H294 | -0.198553943  | 3.217751402   | 10.458464725 |
| H295 | 4.718026651   | 5.752773325   | 4.557614233  |
| H296 | 1.136888220   | 3.983024936   | 8.675813861  |
| H297 | 4.060374766   | -8.880008108  | 0.784678987  |
| H298 | 7.028823854   | -8.129897006  | 0.980932034  |
| H299 | 5.193484129   | 5.506249972   | 2.227593802  |
| H300 | 1.061259254   | -3.377348438  | 4.190607545  |
| H301 | 4.146987003   | 7.644384829   | -0.335562075 |
| H302 | 3.048572956   | 2.429564774   | -2.971755534 |
| H303 | 2.824318326   | 6.559984020   | 0.090826072  |
| H304 | 2.478886269   | -6.794630517  | 1.413412440  |
| H305 | 4.817176167   | 4.790099567   | 0.361853089  |
| H306 | 3.593278807   | -5.731727381  | 0.551511446  |
| H307 | 4.910227951   | -7.634361996  | -0.156768810 |
| H308 | 5.456846981   | -6.448589084  | 2.068686471  |
| H309 | 4.365504869   | -7.587270048  | 2.876949634  |
| H310 | 0.984804292   | 5.713075809   | -5.711908637 |
| H311 | 5.737841909   | -10.548023371 | -0.238909112 |
| H312 | 7.307356560   | -10.498386344 | -2.877872135 |
| H313 | 2.454200750   | 3.076690543   | -0.623425288 |
| H314 | 6.696250593   | -12.728642563 | -1.100003132 |
| H315 | 6.070444853   | -12.362859889 | -2.568387708 |
| H316 | 3.899985059   | -4.416853378  | 2.547633503  |
| H317 | 1.059044536   | 5.043527949   | -0.210769808 |
| H318 | 2.307658213   | 3.853982920   | -4.871440725 |
| H319 | 10.866368158  | -6.220829045  | -0.692131942 |
| H320 | 10.704885010  | -2.788497676  | -0.558359450 |
| H321 | 8.487470797   | -6.087384568  | -0.166823821 |
| H322 | 11.437444347  | -5.538220017  | -1.954860265 |
| H323 | 6.783011476   | 7.744513305   | 3.543739300  |
| H324 | 6.926833932   | -4.056727737  | 1.649073697  |
| H325 | 5.056092078   | -5.329971360  | -2.485536118 |
| H326 | 7.323116204   | 4.310790549   | -0.184520008 |
| H327 | 7.317496559   | -5.046395018  | -3.551595895 |
| H328 | 9.942077403   | 1.228563354   | -3.193730530 |
| H329 | 7.517939778   | 0.787407812   | -2.554466869 |
| H330 | 8.465903052   | -11.446866885 | -1.936175235 |
| H331 | 2.580728579   | -2.873197724  | 3.509767662  |
| H332 | 7.896273434   | -5.874435464  | 2.882554940  |
| H333 | 6.579209296   | -3.658913841  | 3.108262240  |
| H334 | 7.584825092   | -8.232262885  | 3.104833473  |
| H335 | 1.158648063   | -6.681419444  | 3.006663970  |
| H336 | 10.262503742  | -4.134534516  | -5.939243860 |
| H337 | 8.807417128   | -2.389879966  | -3.210705413 |
| H338 | 9.081471665   | -3.789612137  | -2.153733181 |
| H339 | 6.988353173   | -3.505488685  | -4.393198476 |
| H340 | 5.466995479   | 3.441577669   | -1.478575587 |
| H341 | 0.321063321   | 6.511725238   | -2.116822548 |
| H342 | 0.028358732   | 6.749109920   | -4.624054388 |
| H343 | 4.271689102   | -3.883830693  | -1.777252861 |
| H344 | 8.836786697   | -6.672243882  | 1.936544495  |
| H345 | 9.006866605   | -7.550724385  | -0.140491271 |
| H346 | 0.062833821   | -5.425684844  | 3.449249209  |

|       |               |               |              |
|-------|---------------|---------------|--------------|
| H347  | 11.569670695  | -0.209997061  | -1.831135165 |
| H348  | 9.185745495   | -2.627295945  | 0.332842474  |
| H349  | 6.113918627   | 4.316787203   | -2.900394751 |
| H350  | 4.065452801   | 7.378634026   | 4.229010721  |
| H351  | 1.828437512   | -5.269894574  | 6.293775030  |
| H352  | 2.706749843   | -3.720721915  | 6.338411188  |
| H353  | 12.607936662  | -0.684890307  | 1.769937468  |
| H354  | 12.786896533  | -1.735539249  | 0.529027525  |
| H355  | 11.966015552  | -5.994379334  | 2.088642282  |
| H356  | 11.372801444  | -4.233799250  | 0.770707550  |
| H357  | 13.422641063  | -4.061704770  | 3.379564016  |
| H358  | 10.680101950  | -5.459624925  | 3.192675809  |
| H359  | 4.547710081   | -4.762042507  | 8.107771664  |
| H360  | -11.058221153 | 5.017092719   | 6.913462040  |
| H361  | 6.759298066   | -10.752795974 | 4.529470534  |
| H362  | 5.706573922   | -8.365287272  | 5.413291225  |
| H363  | -10.542093791 | 6.790630433   | 4.500434094  |
| H364  | -9.890129039  | 3.780354935   | 4.384376516  |
| H365  | -11.160352892 | 4.605055854   | 3.458850925  |
| H366  | 3.419982423   | -1.057354603  | -1.342862420 |
| H367  | -6.678453422  | 6.887409933   | -0.638377020 |
| H368  | 1.706393870   | -0.995794859  | 1.750929434  |
| H369  | 0.999541780   | -0.832054207  | -0.596056457 |
| H370  | -0.427483877  | 1.125406729   | -1.111964913 |
| Mo371 | 6.185308119   | -1.288798213  | -0.320000563 |
| N372  | 0.112729801   | -1.675526378  | -9.625747872 |
| N373  | -3.604712627  | -1.424754726  | -9.286596130 |
| N374  | -4.847344092  | -3.915006894  | -8.751954963 |
| N375  | -2.851480448  | -5.387715960  | -7.427999725 |
| N376  | -2.475545962  | -3.782599519  | -5.079245131 |
| N377  | -5.037789576  | -4.100927834  | -3.880819791 |
| N378  | -5.426325496  | -6.980193892  | -3.664426041 |
| N379  | -3.000878968  | -8.224097236  | -2.739437029 |
| N380  | -2.067382752  | -6.766421859  | -0.587132280 |
| N381  | -4.057273475  | -5.335150885  | 1.113715447  |
| N382  | -6.149901627  | -7.360971171  | 1.195323261  |
| N383  | 6.370958667   | -11.954029764 | -1.682470634 |
| N384  | 6.424250686   | -9.802517188  | -0.078022774 |
| N385  | 3.170065853   | -5.133329677  | 2.504582917  |
| N386  | 0.972532468   | -5.686924185  | 3.079610594  |
| N387  | 1.805100544   | -3.558940095  | 3.520635084  |
| N388  | 7.066530130   | -9.118452654  | 3.292114106  |
| N389  | -0.410195668  | 2.028792473   | -6.746094638 |
| N390  | 3.611064700   | -0.016708074  | -5.224641049 |
| N391  | -2.331928225  | 3.003233263   | -5.236797283 |
| N392  | -4.913795159  | 3.034345652   | -6.222833312 |
| N393  | -5.975039692  | 0.671379226   | -5.254765587 |
| N394  | -5.820072115  | 0.680149118   | -2.422857762 |
| N395  | -2.789941266  | 3.180144763   | -0.741540606 |
| N396  | -1.360838509  | 1.595029439   | -1.082062035 |
| N397  | -8.000128339  | 1.907239901   | -1.232955872 |
| N398  | -10.653438548 | 5.715433604   | -2.242382583 |
| N399  | -12.395813269 | 5.716213146   | -0.868305982 |
| N400  | 2.580155192   | -3.372458987  | 9.024364569  |
| N401  | -0.200840990  | 2.664537043   | 9.596901114  |
| N402  | -0.387133547  | 5.904250139   | 8.162515704  |
| N403  | -1.163475097  | 6.490299540   | 5.550190320  |
| N404  | -2.510372665  | 7.769461151   | 0.962796650  |
| N405  | -2.767426560  | 9.932354049   | 1.817072767  |
| N406  | -4.631949113  | 8.626675809   | 1.381371564  |
| N407  | -2.479459189  | 4.184742185   | 4.547062077  |
| N408  | -4.560462110  | 3.912416390   | 6.405528889  |
| N409  | -6.522920291  | 5.889346962   | 6.883100384  |
| N410  | -5.183793781  | 8.069351772   | 4.739186059  |
| N411  | -9.004150358  | 5.973157809   | 5.683041681  |
| N412  | 10.824244074  | 4.947020629   | -1.757417740 |
| N413  | 7.306358789   | 4.406268699   | -1.206236132 |
| N414  | 4.696519710   | 5.648733519   | -0.214378049 |
| N415  | 4.796291264   | 6.395994143   | 2.552341109  |
| N416  | 6.319438273   | 6.823612921   | -5.052491346 |
| N417  | 3.440767944   | 6.889607833   | -4.899348342 |
| N418  | 12.156790055  | -1.025605269  | 0.916089669  |
| N419  | 8.347473290   | -0.612498067  | -1.146307834 |

|         |                                        |               |              |
|---------|----------------------------------------|---------------|--------------|
| N420    | 9.658307209                            | 0.577250474   | -2.467185585 |
| N421    | 11.379586143                           | -4.033932056  | 1.770508889  |
| N422    | -1.230181175                           | 0.290669327   | 1.849620850  |
| N423    | -0.105774832                           | 0.432064134   | 1.854428921  |
| O424    | -2.064786046                           | -2.332272737  | -7.875576798 |
| O425    | -5.428435259                           | -3.127981157  | -6.693523200 |
| O426    | -4.484465320                           | -6.703463747  | -6.521808513 |
| O427    | -1.999700905                           | -5.733222767  | -4.004394866 |
| O428    | -4.044331063                           | -3.729313056  | -1.863265576 |
| O429    | -6.417148537                           | -6.492263204  | -1.662345806 |
| O430    | -4.274891483                           | -9.947038206  | -1.921801382 |
| O431    | -0.372086433                           | -8.271094464  | -0.192042686 |
| O432    | -2.587889057                           | -6.022514348  | 2.722868465  |
| O433    | -6.040273513                           | -7.038498409  | 3.440543451  |
| O434    | -6.519376205                           | -10.492612517 | 2.902849530  |
| O435    | 8.506455229                            | -9.120205875  | -0.822546432 |
| O436    | 5.577647020                            | -10.675232537 | 2.489148328  |
| O437    | 6.914941534                            | -9.104506377  | 6.881813949  |
| O438    | -3.085501621                           | 0.952959489   | -4.533783547 |
| O439    | 2.361464534                            | 1.592203043   | -6.237130035 |
| O440    | -5.663283009                           | 4.275137211   | -4.451951235 |
| O441    | -3.774875947                           | 5.900784199   | -3.377298007 |
| O442    | -8.023087018                           | 1.140791271   | -6.189110278 |
| O443    | -7.104306627                           | -1.204630829  | -2.335126593 |
| O444    | -7.598179466                           | 0.757780665   | 0.704087810  |
| O445    | -11.129414642                          | 1.523845779   | 0.374283042  |
| O446    | 3.699013996                            | -6.618171225  | 8.201827658  |
| O447    | -2.994285810                           | -1.388473934  | 6.567343209  |
| O448    | -2.096726629                           | 4.399545906   | 8.140383356  |
| O449    | -2.741095844                           | 7.983482232   | 6.308591650  |
| O450    | -3.593347839                           | 5.577893533   | 3.109338948  |
| O451    | -5.761067547                           | 2.696063581   | 4.875299763  |
| O452    | -2.750685921                           | 1.451876111   | 6.015440817  |
| O453    | -7.331218558                           | 4.725457828   | 8.681148215  |
| O454    | -9.658423948                           | 7.765512632   | 6.931788630  |
| O455    | -7.369388851                           | 8.628853916   | 4.387540787  |
| O456    | -12.570045534                          | 5.690395823   | 5.717552349  |
| O457    | -6.247891720                           | 6.385145859   | 0.080044487  |
| O458    | 8.528755895                            | 4.207555623   | -3.142611641 |
| O459    | 4.957706149                            | 6.502973921   | -2.324062979 |
| O460    | 3.392886760                            | 8.151951744   | 2.123181078  |
| O461    | 6.563483612                            | 7.390036295   | 5.542178978  |
| O462    | 3.517421260                            | 6.872300468   | -7.180128712 |
| O463    | 6.177303164                            | 1.515699413   | -6.193779290 |
| O464    | 7.347293533                            | 2.210642853   | -4.426312565 |
| O465    | 0.894585237                            | 8.778801745   | -3.275971969 |
| O466    | 11.055425662                           | -2.603801333  | 3.497718878  |
| O467    | 12.778923506                           | -5.400922067  | 4.779827078  |
| O468    | 3.641135244                            | -2.876647001  | -4.107780270 |
| O469    | 4.581164902                            | -4.710242828  | -4.944876185 |
| O470    | 10.754250576                           | -4.743880094  | -3.788302383 |
| O471    | 9.551853625                            | -3.720896379  | -5.403854488 |
| O472    | 7.125176051                            | -3.323727910  | -0.041636874 |
| O473    | 7.117672953                            | -5.396727062  | -0.924950081 |
| O474    | 6.191126091                            | -2.182225564  | -2.216962926 |
| O475    | 8.470023918                            | -6.681816399  | 2.860403787  |
| O476    | 6.765675721                            | -4.438188813  | 2.548994198  |
| O477    | -3.794279656                           | 5.770682611   | -0.640457290 |
| O478    | 11.719440867                           | -5.928391160  | -1.101768350 |
| O479    | 9.245692396                            | -6.641352742  | 0.177121023  |
| S480    | 0.711941240                            | 3.638823189   | 5.686189116  |
| S481    | 1.794073236                            | 3.032019783   | 2.097774673  |
| S482    | 5.238979567                            | 0.708050687   | -1.201665575 |
| S483    | 1.449619291                            | 0.069966530   | 4.170321662  |
| S484    | 1.578527073                            | 0.393889604   | -0.486447109 |
| S485    | 5.856312146                            | 3.211761403   | 1.590040422  |
| S486    | 4.254162648                            | -2.490818160  | 0.480999085  |
| S487    | 4.224306618                            | 2.135609821   | 4.778252362  |
| S488    | 7.051993491                            | -0.488819528  | 1.757482734  |
| S489    | 4.609412452                            | -1.797375175  | 4.187426107  |
| D 35(1) | bm2cnx2b6x2hn2n2xd135ti_1_53119.501    |               |              |
| C1      | -2.326200984 -1.782269061 -8.960796727 |               |              |

|          |              |     |               |               |               |
|----------|--------------|-----|---------------|---------------|---------------|
|          | TS           | C2  | -1.267854788  | -1.521962573  | -10.037897188 |
| Fe( 139) | 0.548 -2.415 | C3  | -4.679157422  | -1.505824371  | -8.312536445  |
| Fe( 140) | 0.361 -0.564 | C4  | -5.008998767  | -2.923207740  | -7.849190895  |
| Fe( 141) | 0.536 -2.514 | C5  | -5.094888759  | -5.302143226  | -8.391782452  |
| Fe( 142) | 0.576 2.851  | C6  | -4.115583854  | -5.855847159  | -7.352181981  |
| Fe( 143) | 0.609 3.213  | C7  | -1.854409322  | -5.740578211  | -6.417540287  |
| Fe( 144) | 0.521 2.345  | C8  | -2.108590766  | -5.086719448  | -5.055856828  |
| Fe( 145) | 0.354 -1.708 | C9  | -2.789896736  | -3.085355442  | -3.836440217  |
|          |              | C10 | -4.007969922  | -3.665127424  | -3.101377025  |
|          |              | C11 | -6.211942903  | -4.683357666  | -3.261711980  |
|          |              | C12 | -6.005166672  | -6.125479435  | -2.776080053  |
|          |              | C13 | -5.361339976  | -8.406200211  | -3.400773391  |
|          |              | C14 | -4.153958308  | -8.923533076  | -2.612999460  |
|          |              | C15 | -1.766675913  | -8.661195057  | -2.098306760  |
|          |              | C16 | -1.337997774  | -7.878481095  | -0.854533332  |
|          |              | C17 | -1.721802861  | -5.823880822  | 0.476778903   |
|          |              | C18 | -2.820612807  | -5.731429899  | 1.549081832   |
|          |              | C19 | -1.319672235  | -4.442472484  | -0.113114567  |
|          |              | C20 | -1.147725116  | -3.365442460  | 0.962098097   |
|          |              | C21 | -0.049176926  | -4.567251490  | -0.962047902  |
|          |              | C22 | -5.189995993  | -5.243278231  | 2.049553640   |
|          |              | C23 | -5.826017332  | -6.624024949  | 2.301309026   |
|          |              | C24 | -6.217262261  | -4.191346304  | 1.567277307   |
|          |              | C25 | -7.460524816  | -4.181543504  | 2.463579959   |
|          |              | C26 | -5.580967909  | -2.795385809  | 1.517301654   |
|          |              | C27 | -6.793577835  | -8.650825949  | 1.382482939   |
|          |              | C28 | -6.007940757  | -9.563566907  | 2.305654279   |
|          |              | C29 | 7.457584432   | -10.998086465 | -1.910262883  |
|          |              | C30 | 7.513415031   | -9.886386893  | -0.862341023  |
|          |              | C31 | 6.207671991   | -8.865690581  | 1.008622819   |
|          |              | C32 | 6.247014334   | -9.644871538  | 2.337635044   |
|          |              | C33 | 4.867345974   | -8.134083555  | 0.818069821   |
|          |              | C34 | 4.576740054   | -7.099751172  | 1.908126085   |
|          |              | C35 | 3.395509205   | -6.211013596  | 1.520129498   |
|          |              | C36 | 1.978082024   | -4.804943543  | 3.033599281   |
|          |              | C37 | 7.238277247   | -9.765649202  | 4.573445268   |
|          |              | C38 | 6.580912336   | -9.019039389  | 5.715097877   |
|          |              | C39 | -0.998666373  | 1.055002883   | -5.809538498  |
|          |              | C40 | -2.245256955  | 1.648922582   | -5.131122248  |
|          |              | C41 | -0.007191427  | 0.652040659   | -4.691220102  |
|          |              | C42 | 1.182304037   | -0.229714132  | -5.125450825  |
|          |              | C43 | 2.429685903   | 0.534833652   | -5.566322364  |
|          |              | C44 | -3.319501624  | 3.764396793   | -4.498724335  |
|          |              | C45 | -4.737886144  | 3.725700390   | -5.084314906  |
|          |              | C46 | -2.868303948  | 5.219151033   | -4.260625581  |
|          |              | C47 | -6.237874983  | 2.651781539   | -6.698098907  |
|          |              | C48 | -6.836452746  | 1.412538132   | -6.014412321  |
|          |              | C49 | -6.432409052  | -0.503799288  | -4.524913254  |
|          |              | C50 | -6.479142060  | -0.383149724  | -3.000967442  |
|          |              | C51 | -5.826410006  | 0.819164190   | -0.966892458  |
|          |              | C52 | -7.248437571  | 1.112970760   | -0.428774358  |
|          |              | C53 | -4.981831867  | 2.017326230   | -0.506228492  |
|          |              | C54 | -3.514880647  | 1.990556310   | -0.787386069  |
|          |              | C55 | -2.599535977  | 0.989179779   | -1.003556265  |
|          |              | C56 | -1.485270281  | 2.907221588   | -0.929562448  |
|          |              | C57 | -9.241290823  | 2.531565343   | -0.811405876  |
|          |              | C58 | -10.261358020 | 1.441741873   | -0.491191121  |
|          |              | C59 | -9.734423697  | 3.421288864   | -1.975655141  |
|          |              | C60 | -10.736597714 | 4.482894784   | -1.630567287  |
|          |              | C61 | -11.811135108 | 4.469974745   | -0.762422074  |
|          |              | C62 | -11.656459777 | 6.437330521   | -1.771498118  |
|          |              | C63 | 2.331002237   | -4.608286457  | 8.283094971   |
|          |              | C64 | 3.625717837   | -5.394477018  | 8.194709522   |
|          |              | C65 | 1.893666221   | -4.312010669  | 6.823266589   |
|          |              | C66 | 0.586311926   | -3.560453918  | 6.738709148   |
|          |              | C67 | -0.645112790  | -4.236413121  | 6.656502718   |
|          |              | C68 | 0.564092750   | -2.153198096  | 6.757594009   |
|          |              | C69 | -1.855120643  | -3.537091702  | 6.593133167   |
|          |              | C70 | -0.635209639  | -1.442064754  | 6.710060655   |
|          |              | C71 | -1.845106011  | -2.136266823  | 6.626534113   |
|          |              | C72 | 0.152414659   | 3.528133079   | 8.472508269   |
|          |              | C73 | -0.882395416  | 4.636706241   | 8.243487075   |
|          |              | C74 | 0.291179646   | 2.658614116   | 7.211948571   |

|       |               |              |              |
|-------|---------------|--------------|--------------|
| C75   | -1.253483368  | 7.050143973  | 7.947105450  |
| C76   | -1.787177119  | 7.204685775  | 6.521722356  |
| C77   | -1.595573490  | 6.468047355  | 4.168083683  |
| C78   | -2.638724667  | 5.363478322  | 3.894019081  |
| C79   | -0.350341083  | 6.365506454  | 3.268077376  |
| C80   | -0.561504802  | 6.384016982  | 1.751848548  |
| C81   | -1.048130985  | 7.703038568  | 1.128467296  |
| C82   | -3.284866214  | 8.776041813  | 1.342659525  |
| C83   | -3.431403861  | 3.104127524  | 4.356796108  |
| C84   | -4.696500690  | 3.238672574  | 5.223363728  |
| C85   | -2.821778957  | 1.716234904  | 4.623934748  |
| C86   | -5.516754562  | 3.708144549  | 7.474887064  |
| C87   | -6.529844677  | 4.818297548  | 7.733834539  |
| C88   | -7.338914995  | 7.062899663  | 7.140656574  |
| C89   | -8.769923980  | 6.966248733  | 6.569759188  |
| C90   | -6.634546839  | 8.354554626  | 6.675294610  |
| C91   | -6.425556362  | 8.387212902  | 5.166198933  |
| C92   | -10.267654671 | 5.837276437  | 4.984082850  |
| C93   | -11.382772111 | 5.494099409  | 5.964467465  |
| C94   | -10.158337548 | 4.732275121  | 3.899645402  |
| C95   | -9.146591057  | 5.087297505  | 2.833855776  |
| C96   | -9.494191631  | 5.959495934  | 1.789399791  |
| C97   | -7.824068946  | 4.616549385  | 2.891928539  |
| C98   | -8.550646525  | 6.377123467  | 0.848460466  |
| C99   | -6.859335905  | 5.040488649  | 1.971114237  |
| C100  | -7.236237905  | 5.922332569  | 0.960114769  |
| C101  | 9.724962552   | 4.284196043  | -1.051268263 |
| C102  | 8.460561554   | 4.313482741  | -1.891126145 |
| C103  | 5.981624585   | 4.356265544  | -1.817112316 |
| C104  | 5.155782326   | 5.601427454  | -1.480864577 |
| C105  | 3.889945930   | 6.757337019  | 0.264736649  |
| C106  | 4.013207470   | 7.150758050  | 1.733622329  |
| C107  | 4.869009605   | 6.674222191  | 3.978106220  |
| C108  | 6.175392403   | 7.321724280  | 4.384086333  |
| C109  | 5.486353997   | 6.081019463  | -6.002425068 |
| C110  | 4.070738188   | 6.662095125  | -6.085237051 |
| C111  | 5.396989157   | 4.550364335  | -5.802810644 |
| C112  | 6.742333835   | 3.865653572  | -6.104915943 |
| C113  | 6.734706879   | 2.439101116  | -5.603698395 |
| C114  | 2.064732892   | 7.355141309  | -4.870475515 |
| C115  | 1.919371348   | 8.476533496  | -3.861325085 |
| C116  | 0.994421174   | 6.242028763  | -4.769553303 |
| C117  | 1.273278813   | 5.302972890  | -3.626828827 |
| C118  | 0.887607783   | 5.628375227  | -2.315748766 |
| C119  | 2.036642068   | 4.140343461  | -3.837386220 |
| C120  | 1.307846465   | 4.838189723  | -1.240868468 |
| C121  | 2.452772050   | 3.350789222  | -2.760545131 |
| C122  | 2.110138286   | 3.712063692  | -1.454958264 |
| C123  | 10.869852933  | -1.656597146 | 1.270879266  |
| C124  | 11.082238413  | -2.809941347 | 2.264401888  |
| C125  | 10.093145505  | -2.086806006 | 0.016657935  |
| C126  | 9.680405880   | -0.979077064 | -0.902580058 |
| C127  | 10.499170085  | -0.231657695 | -1.724207299 |
| C128  | 8.386704990   | 0.314930758  | -2.097862928 |
| C129  | 11.607772414  | -5.147384603 | 2.679414405  |
| C130  | 12.673017741  | -4.824355951 | 3.704636022  |
| C131  | 4.342522861   | -3.873050539 | -3.900771434 |
| C132  | 4.944658875   | -4.236204706 | -2.571971658 |
| C133  | 6.348887876   | -3.557775258 | -2.315117572 |
| C134  | 7.340670533   | -3.956929869 | -3.446525277 |
| C135  | 8.776836736   | -3.488669728 | -3.159419624 |
| C136  | 9.798604447   | -4.048071194 | -4.108378376 |
| C137  | 6.897094521   | -4.175378737 | -0.994064697 |
| C138  | 3.900087952   | 0.523861026  | 1.912229074  |
| Fe139 | 5.579804455   | 1.046440709  | 0.962969299  |
| Fe140 | 1.950088398   | 0.595827680  | 1.815475556  |
| Fe141 | 3.650225479   | 0.168659576  | 3.872250252  |
| Fe142 | 3.983286252   | 2.398682550  | 2.517496046  |
| Fe143 | 1.974692890   | 2.219917148  | 4.287072322  |
| Fe144 | 4.964452247   | -1.162399485 | 2.135122624  |
| Fe145 | 3.695507062   | -0.406505076 | -0.035237359 |
| H146  | 0.249191532   | -2.577967445 | -9.173752794 |
| H147  | 0.350850206   | -0.969365517 | -8.917531497 |

|      |              |              |               |
|------|--------------|--------------|---------------|
| H148 | -3.759757260 | -0.902700547 | -10.146013290 |
| H149 | -1.421344534 | -0.512696158 | -10.451577762 |
| H150 | -1.475292580 | -2.221941818 | -10.865917910 |
| H151 | -4.434715643 | -0.933925404 | -7.406380878  |
| H152 | -4.505148417 | -3.686572966 | -9.687209695  |
| H153 | -5.580573488 | -1.068367123 | -8.763596893  |
| H154 | -5.033965823 | -5.916898798 | -9.299427870  |
| H155 | -2.642715520 | -4.603334679 | -8.042529953  |
| H156 | -6.102361090 | -5.410927215 | -7.969559085  |
| H157 | -1.946406896 | -3.138443375 | -3.134404138  |
| H158 | -2.477145686 | -3.261917806 | -5.959487830  |
| H159 | -0.864095451 | -5.441870244 | -6.786044518  |
| H160 | -6.518982845 | -4.086474963 | -2.394030548  |
| H161 | -5.012141390 | -3.943824202 | -4.889917511  |
| H162 | -1.854137133 | -6.825158484 | -6.256513512  |
| H163 | -2.970311278 | -2.026272808 | -4.073757260  |
| H164 | -5.162656844 | -6.648079344 | -4.593628291  |
| H165 | -7.027610126 | -4.675332054 | -3.997616987  |
| H166 | -0.166091724 | -5.306596935 | -1.766589495  |
| H167 | 0.193467690  | -3.599852260 | -1.428252632  |
| H168 | 0.812817415  | -4.858603656 | -0.341315811  |
| H169 | -2.145102196 | -4.125247367 | -0.771175590  |
| H170 | -5.371724781 | -8.928141757 | -4.368448796  |
| H171 | -4.717290570 | -2.757178582 | 0.838109695   |
| H172 | -6.042002050 | -6.991775569 | 0.260250238   |
| H173 | -7.979268650 | -5.151295093 | 2.468978042   |
| H174 | -0.958679657 | -2.393412770 | 0.483474138   |
| H175 | -0.286839938 | -3.566828090 | 1.614409573   |
| H176 | 1.568282293  | -5.266110549 | 8.741958034   |
| H177 | -6.320469514 | -2.057565759 | 1.172492679   |
| H178 | -8.168759235 | -3.417543960 | 2.111660329   |
| H179 | -5.244453438 | -2.491421273 | 2.522038801   |
| H180 | -7.188054301 | -3.938606734 | 3.503053371   |
| H181 | -6.529798563 | -4.471835647 | 0.544695471   |
| H182 | -4.792076825 | -4.934179683 | 3.026833782   |
| H183 | -4.188702836 | -5.028579875 | 0.161922275   |
| H184 | -2.040665350 | -3.251467198 | 1.594311852   |
| H185 | -1.813940503 | 1.687133240  | 4.178312085   |
| H186 | -3.456355500 | 0.973875660  | 4.115282364   |
| H187 | -2.886958631 | 0.489728513  | 6.155142555   |
| H188 | -3.773325295 | -1.977297544 | 6.455232571   |
| H189 | -0.631542634 | -0.351554368 | 6.704124008   |
| H190 | 1.504794272  | -1.598270255 | 6.778265485   |
| H191 | -0.664364561 | -5.329575652 | 6.633593144   |
| H192 | -2.790755780 | -6.511018826 | -1.249772503  |
| H193 | -0.934180740 | -8.605184448 | -2.815515910  |
| H194 | -1.888899512 | -9.711016949 | -1.800529608  |
| H195 | -2.932316105 | -7.422057885 | -3.377803923  |
| H196 | -6.251522170 | -8.711652464 | -2.836557073  |
| H197 | -2.801871617 | -4.078039246 | 6.513483510   |
| H198 | -0.857826691 | -6.263592811 | 0.990766429   |
| H199 | -7.823512534 | -8.558249041 | 1.762905135   |
| H200 | -6.835395901 | -9.144121906 | 0.398131057   |
| H201 | -4.909848234 | -9.370227199 | 2.335004093   |
| H202 | 8.303470111  | -9.917340672 | 4.803478410   |
| H203 | 4.477207537  | 0.448925562  | -5.508136049  |
| H204 | 5.144794811  | -5.473205734 | -4.618092517  |
| H205 | 6.907150405  | 3.850019567  | -7.192126875  |
| H206 | 7.564649457  | 4.426709925  | -5.638501398  |
| H207 | 4.624140968  | 4.124142232  | -6.460962200  |
| H208 | 2.854592218  | 9.062438649  | -3.694947799  |
| H209 | 5.904046173  | 6.260491829  | -7.005099874  |
| H210 | 0.363491558  | 1.570742140  | -4.208184563  |
| H211 | 0.884472525  | -0.879852661 | -5.966824591  |
| H212 | 3.903232656  | 6.653497617  | -4.012973945  |
| H213 | 1.919926244  | 7.856495338  | -5.849226054  |
| H214 | 6.061911323  | 6.609259534  | -4.078031293  |
| H215 | 3.669644915  | -0.872277597 | -4.670134204  |
| H216 | 5.078772994  | 4.345824467  | -4.768819121  |
| H217 | 7.298852702  | 6.559791527  | -5.164818834  |
| H218 | -0.710279512 | 1.840090938  | -7.700602867  |
| H219 | -0.583009743 | 0.098808655  | -3.934601217  |
| H220 | 7.739518917  | 3.057412208  | -4.029497162  |



|      |               |              |              |
|------|---------------|--------------|--------------|
| H221 | 1.445144761   | -0.906162848 | -4.299731030 |
| H222 | -5.497422551  | -0.111424310 | -0.480977714 |
| H223 | -2.723631152  | -0.084265066 | -1.083898808 |
| H224 | -7.456991426  | -0.727052361 | -4.847814638 |
| H225 | -4.990220432  | 0.919162013  | -5.196233680 |
| H226 | -7.632622719  | 2.121294465  | -2.166736315 |
| H227 | -12.192871680 | 3.716025603  | -0.083973481 |
| H228 | -10.183191404 | 0.541885451  | -1.148399798 |
| H229 | -10.107613199 | 2.775534486  | -2.790848822 |
| H230 | -9.079337732  | 3.140449169  | 0.092307368  |
| H231 | -11.901085690 | 7.461371367  | -2.041817774 |
| H232 | -5.124725842  | 2.096129565  | 0.584255040  |
| H233 | -5.408765541  | 2.934965647  | -0.943018967 |
| H234 | -13.188811318 | 6.052859484  | -0.344169061 |
| H235 | -8.855598018  | 3.947381547  | -2.379673221 |
| H236 | -5.091219357  | 1.148460916  | -2.961073399 |
| H237 | -5.817250863  | -1.377774207 | -4.787024716 |
| H238 | -6.938282876  | 3.479256343  | -6.527901696 |
| H239 | -0.666770974  | 3.620938892  | -0.947091844 |
| H240 | -6.196084678  | 2.464926179  | -7.779520867 |
| H241 | 2.649978291   | -3.562634427 | 10.017565147 |
| H242 | 1.776641178   | -2.738152075 | 8.908372149  |
| H243 | -1.553353101  | 3.971531469  | 4.991928071  |
| H244 | -3.772539225  | 3.132327595  | 3.311312647  |
| H245 | -3.598775662  | 4.132575267  | 6.704051546  |
| H246 | -3.187210845  | 4.143126698  | -0.622926523 |
| H247 | -3.741051739  | 5.915720991  | -1.629100076 |
| H248 | -4.746715095  | 5.813069887  | -0.408735780 |
| H249 | -1.877972601  | 5.217231841  | -3.784753136 |
| H250 | -2.799180494  | 5.755845795  | -5.221929097 |
| H251 | -5.683023855  | 8.445941667  | 7.219282772  |
| H252 | -7.276732648  | 9.201550248  | 6.951055662  |
| H253 | -4.355274397  | 8.012502259  | 5.358243886  |
| H254 | -5.017017847  | 8.025629634  | 3.734601615  |
| H255 | -3.395545477  | 10.668285161 | 2.118635558  |
| H256 | -0.589565657  | 7.840664712  | 0.136765950  |
| H257 | -8.840034775  | 7.048992744  | 0.036308593  |
| H258 | -7.515907728  | 3.908152593  | 3.665917216  |
| H259 | -5.051105538  | 7.761860004  | 1.015506928  |
| H260 | 0.185613590   | 5.434591985  | 3.512651714  |
| H261 | -0.433040959  | 5.813979666  | 5.836751789  |
| H262 | -1.215265617  | 5.555607007  | 1.436836233  |
| H263 | -4.091883892  | 2.653443178  | -6.685101716 |
| H264 | -0.701811854  | 7.964546857  | 8.202674460  |
| H265 | -1.578418823  | 3.407998228  | -5.807461713 |
| H266 | 0.318345968   | 7.196968051  | 3.546755758  |
| H267 | -5.822081677  | 4.714290063  | 2.069451876  |
| H268 | -4.682008185  | 5.582634378  | -3.645085311 |
| H269 | -2.133584107  | 6.996500690  | 8.604049642  |
| H270 | -1.830056090  | 10.217824603 | 1.538943400  |
| H271 | -5.208636699  | 9.456493982  | 1.284118425  |
| H272 | 0.620374145   | 1.968266729  | -6.694985213 |
| H273 | -1.342177865  | 0.126857005  | -6.303728353 |
| H274 | -10.518819334 | 6.328157668  | 1.707276129  |
| H275 | -3.436512190  | 3.290622015  | -3.509154713 |
| H276 | -2.123303390  | 7.413090278  | 3.983660069  |
| H277 | -0.715905320  | 8.543829564  | 1.751377673  |
| H278 | 0.426465851   | 6.173296061  | 1.321550968  |
| H279 | -2.957376725  | 6.982605650  | 0.460202998  |
| H280 | -6.099116577  | 2.797642564  | 7.269642130  |
| H281 | -5.751897164  | 5.936327053  | 6.203014970  |
| H282 | -7.481259328  | 7.127514341  | 8.229473156  |
| H283 | -4.972344794  | 3.553098113  | 8.416615716  |
| H284 | -8.205125391  | 5.404006019  | 5.385249450  |
| H285 | 9.548133854   | 4.779885721  | -0.086312068 |
| H286 | 9.913411811   | 3.212837386  | -0.829091620 |
| H287 | 10.270312800  | -0.911225475 | 1.814335425  |
| H288 | 11.699740600  | 4.732512875  | -1.288857072 |
| H289 | 10.885102325  | 4.561537637  | -2.699995523 |
| H290 | 1.077762303   | 1.915709132  | 7.398282028  |
| H291 | -1.183368386  | 2.352901760  | 9.468138493  |
| H292 | 0.612499499   | 6.049252063  | 8.243345419  |
| H293 | -0.661322630  | 2.141825393  | 7.029290692  |

|      |               |               |              |
|------|---------------|---------------|--------------|
| H294 | -0.219437252  | 3.214764220   | 10.467777795 |
| H295 | 4.713393552   | 5.752894952   | 4.560472569  |
| H296 | 1.129525851   | 3.984304039   | 8.696739004  |
| H297 | 4.056795588   | -8.880757288  | 0.771086498  |
| H298 | 7.026110078   | -8.136793185  | 0.976113475  |
| H299 | 5.185199579   | 5.504101107   | 2.230613607  |
| H300 | 1.046847204   | -3.385983782  | 4.172194806  |
| H301 | 4.139499554   | 7.643851990   | -0.333291850 |
| H302 | 3.057227535   | 2.457320064   | -2.932571181 |
| H303 | 2.820975274   | 6.553255091   | 0.090439367  |
| H304 | 2.477786668   | -6.800447963  | 1.400032298  |
| H305 | 4.820446270   | 4.789972475   | 0.361244776  |
| H306 | 3.593941928   | -5.732489015  | 0.546357777  |
| H307 | 4.913758303   | -7.634801481  | -0.163524239 |
| H308 | 5.453865305   | -6.454019234  | 2.063894820  |
| H309 | 4.360364347   | -7.593781264  | 2.869085013  |
| H310 | 0.993262475   | 5.697348824   | -5.725080548 |
| H311 | 5.733275481   | -10.552219356 | -0.244274800 |
| H312 | 7.301157980   | -10.499508312 | -2.879097308 |
| H313 | 2.445297234   | 3.129451891   | -0.594657777 |
| H314 | 6.702964052   | -12.734598950 | -1.101683823 |
| H315 | 6.075699578   | -12.372500283 | -2.569966942 |
| H316 | 3.891503293   | -4.423837609  | 2.546922026  |
| H317 | 1.025952924   | 5.087982549   | -0.216728359 |
| H318 | 2.312547035   | 3.851969521   | -4.854336471 |
| H319 | 10.866679798  | -6.226567580  | -0.695870515 |
| H320 | 10.717394216  | -2.789814415  | -0.563077166 |
| H321 | 8.485962944   | -6.092875205  | -0.170737838 |
| H322 | 11.444461515  | -5.538915692  | -1.953938002 |
| H323 | 6.765712143   | 7.763709021   | 3.544490148  |
| H324 | 6.925951436   | -4.060846378  | 1.652082999  |
| H325 | 5.050264182   | -5.326533891  | -2.471821821 |
| H326 | 7.320452016   | 4.312563706   | -0.185301014 |
| H327 | 7.329743996   | -5.053871556  | -3.550384082 |
| H328 | 9.947398449   | 1.223225600   | -3.198087958 |
| H329 | 7.524172989   | 0.789226398   | -2.547867351 |
| H330 | 8.465514270   | -11.445689895 | -1.942595586 |
| H331 | 2.570102043   | -2.882899197  | 3.500367879  |
| H332 | 7.896969685   | -5.880942562  | 2.879149994  |
| H333 | 6.564376778   | -3.668825394  | 3.110885424  |
| H334 | 7.583130977   | -8.237801345  | 3.096971772  |
| H335 | 1.149203063   | -6.690129226  | 2.988586944  |
| H336 | 10.262859088  | -4.136135184  | -5.940053444 |
| H337 | 8.808146834   | -2.389966041  | -3.209903910 |
| H338 | 9.090572557   | -3.786962907  | -2.152714893 |
| H339 | 6.995124610   | -3.513519020  | -4.391779120 |
| H340 | 5.467632980   | 3.443114925   | -1.476519454 |
| H341 | 0.283088004   | 6.522338442   | -2.143597113 |
| H342 | 0.018653475   | 6.739540147   | -4.658134883 |
| H343 | 4.276620160   | -3.864732504  | -1.783787902 |
| H344 | 8.837674032   | -6.676918008  | 1.931276296  |
| H345 | 9.008085506   | -7.555658362  | -0.140650856 |
| H346 | 0.044359248   | -5.434543091  | 3.411174793  |
| H347 | 11.576194014  | -0.222864438  | -1.844967727 |
| H348 | 9.195041368   | -2.636382428  | 0.323916655  |
| H349 | 6.111398882   | 4.318594403   | -2.900616397 |
| H350 | 4.058989557   | 7.378526208   | 4.232474038  |
| H351 | 1.810514167   | -5.277704721  | 6.301187990  |
| H352 | 2.692259195   | -3.729999826  | 6.335906004  |
| H353 | 12.604686012  | -0.686102066  | 1.778662431  |
| H354 | 12.790598825  | -1.731228107  | 0.533852041  |
| H355 | 11.975785875  | -5.999193694  | 2.085168834  |
| H356 | 11.370828208  | -4.241565808  | 0.764554670  |
| H357 | 13.424247553  | -4.065318721  | 3.375149129  |
| H358 | 10.682658281  | -5.468792770  | 3.184026392  |
| H359 | 4.536736068   | -4.756630804  | 8.085076361  |
| H360 | -11.046821683 | 5.016475484   | 6.914748829  |
| H361 | 6.756826768   | -10.757733686 | 4.521159827  |
| H362 | 5.736880339   | -8.348416860  | 5.421087032  |
| H363 | -10.537714194 | 6.790616266   | 4.500318765  |
| H364 | -9.887654938  | 3.780041582   | 4.381809140  |
| H365 | -11.157176796 | 4.605943141   | 3.456752438  |
| H366 | 3.425008958   | -1.050152806  | -1.371761616 |

|       |               |               |              |
|-------|---------------|---------------|--------------|
| H367  | -6.672850684  | 6.878353559   | -0.644001668 |
| H368  | 1.772169065   | -0.917804770  | 1.739481500  |
| H369  | 1.000874267   | -0.828281068  | -0.536838321 |
| H370  | -0.415673657  | 1.122931867   | -1.103790351 |
| Mo371 | 6.200114620   | -1.298391499  | -0.317797749 |
| N372  | 0.117575905   | -1.669352496  | -9.625586224 |
| N373  | -3.599920281  | -1.423133059  | -9.286904511 |
| N374  | -4.838892627  | -3.917660717  | -8.754796225 |
| N375  | -2.844192050  | -5.386337703  | -7.422843564 |
| N376  | -2.471079752  | -3.777729594  | -5.077534735 |
| N377  | -5.033884797  | -4.094043013  | -3.878464348 |
| N378  | -5.419474062  | -6.975811738  | -3.658899950 |
| N379  | -2.993874819  | -8.219608984  | -2.737619237 |
| N380  | -2.069772277  | -6.766242345  | -0.578660055 |
| N381  | -4.056572660  | -5.338431778  | 1.125600591  |
| N382  | -6.146961290  | -7.362634354  | 1.207193125  |
| N383  | 6.373516124   | -11.961429410 | -1.684004269 |
| N384  | 6.419551013   | -9.807455560  | -0.082143507 |
| N385  | 3.162386947   | -5.141327481  | 2.499312460  |
| N386  | 0.962079925   | -5.695854666  | 3.061280952  |
| N387  | 1.787633466   | -3.562756661  | 3.497257490  |
| N388  | 7.063290025   | -9.122772985  | 3.286024416  |
| N389  | -0.413668043  | 2.025194537   | -6.740281444 |
| N390  | 3.609574414   | -0.009850257  | -5.214809725 |
| N391  | -2.337868282  | 2.999241255   | -5.237559949 |
| N392  | -4.918212395  | 3.027455534   | -6.224623144 |
| N393  | -5.982028790  | 0.667521257   | -5.254742230 |
| N394  | -5.813364667  | 0.671251879   | -2.422271036 |
| N395  | -2.787034365  | 3.175915877   | -0.753774666 |
| N396  | -1.357787697  | 1.588388396   | -1.096309698 |
| N397  | -7.990083679  | 1.914579441   | -1.236652981 |
| N398  | -10.651839075 | 5.716782033   | -2.256257891 |
| N399  | -12.380223108 | 5.722455799   | -0.864467273 |
| N400  | 2.578787813   | -3.365208360  | 9.016230942  |
| N401  | -0.215822378  | 2.663843602   | 9.604471186  |
| N402  | -0.391829746  | 5.907186867   | 8.177979377  |
| N403  | -1.160737581  | 6.491270302   | 5.561930056  |
| N404  | -2.506511170  | 7.765682202   | 0.964584583  |
| N405  | -2.770984784  | 9.938024415   | 1.792280201  |
| N406  | -4.630961479  | 8.623911295   | 1.367290977  |
| N407  | -2.468885411  | 4.183867339   | 4.549366634  |
| N408  | -4.553273957  | 3.910388937   | 6.403440342  |
| N409  | -6.512271443  | 5.886646399   | 6.882318704  |
| N410  | -5.174016356  | 8.075764291   | 4.740150703  |
| N411  | -8.996494957  | 5.971272649   | 5.678713470  |
| N412  | 10.819330521  | 4.957342113   | -1.757707702 |
| N413  | 7.304397079   | 4.411426946   | -1.207020520 |
| N414  | 4.697068881   | 5.649826508   | -0.213586612 |
| N415  | 4.788735324   | 6.393902157   | 2.554781891  |
| N416  | 6.318251306   | 6.825406462   | -5.049222747 |
| N417  | 3.434541368   | 6.876451780   | -4.897940449 |
| N418  | 12.157103375  | -1.024687729  | 0.921782211  |
| N419  | 8.355958581   | -0.613427907  | -1.144915738 |
| N420  | 9.665061314   | 0.573095288   | -2.469985431 |
| N421  | 11.382082873  | -4.040491718  | 1.764148941  |
| N422  | -1.620849818  | 0.217441069   | 1.888856774  |
| N423  | -0.571024871  | 0.592464149   | 1.869308564  |
| O424  | -2.059158665  | -2.326085185  | -7.873008286 |
| O425  | -5.428543116  | -3.130894476  | -6.698985129 |
| O426  | -4.478653171  | -6.703805343  | -6.521221876 |
| O427  | -1.997129529  | -5.725181351  | -3.997067502 |
| O428  | -4.040237167  | -3.716102212  | -1.861758189 |
| O429  | -6.402192156  | -6.483596146  | -1.653883912 |
| O430  | -4.261188472  | -9.956736519  | -1.939133631 |
| O431  | -0.366203435  | -8.263094043  | -0.189912968 |
| O432  | -2.572645032  | -5.993584696  | 2.736260523  |
| O433  | -6.039152561  | -7.040184910  | 3.452258398  |
| O434  | -6.512903059  | -10.492931958 | 2.916857316  |
| O435  | 8.508390488   | -9.132434685  | -0.812028058 |
| O436  | 5.568626532   | -10.676707820 | 2.486761078  |
| O437  | 6.921863190   | -9.140072214  | 6.881382608  |
| O438  | -3.088849727  | 0.950235797   | -4.526498952 |
| O439  | 2.355624764   | 1.592738499   | -6.232495001 |

|  |                           |               |              |               |
|--|---------------------------|---------------|--------------|---------------|
|  | O440                      | -5.667059101  | 4.283052402  | -4.463766208  |
|  | O441                      | -3.778554466  | 5.898025165  | -3.380026978  |
|  | O442                      | -8.029948654  | 1.138627031  | -6.188378537  |
|  | O443                      | -7.124211881  | -1.194723068 | -2.333457792  |
|  | O444                      | -7.603559740  | 0.751963959  | 0.695293285   |
|  | O445                      | -11.119366805 | 1.532342406  | 0.369477034   |
|  | O446                      | 3.694586311   | -6.614997682 | 8.207123647   |
|  | O447                      | -3.004917354  | -1.387075111 | 6.562948649   |
|  | O448                      | -2.100545780  | 4.401429549  | 8.140182535   |
|  | O449                      | -2.735974423  | 7.989629121  | 6.315076170   |
|  | O450                      | -3.586991529  | 5.580218956  | 3.118680451   |
|  | O451                      | -5.755596077  | 2.705588320  | 4.864510653   |
|  | O452                      | -2.763931099  | 1.452731541  | 6.028022573   |
|  | O453                      | -7.330608566  | 4.716113801  | 8.671597510   |
|  | O454                      | -9.652854425  | 7.752598054  | 6.941027915   |
|  | O455                      | -7.362666520  | 8.618654106  | 4.385437123   |
|  | O456                      | -12.563276016 | 5.685216466  | 5.721396487   |
|  | O457                      | -6.243865884  | 6.373732287  | 0.073456825   |
|  | O458                      | 8.526791619   | 4.217208558  | -3.143809512  |
|  | O459                      | 4.947033797   | 6.500280760  | -2.326183742  |
|  | O460                      | 3.383476180   | 8.147781200  | 2.124687091   |
|  | O461                      | 6.566153883   | 7.379903414  | 5.538849668   |
|  | O462                      | 3.524962999   | 6.885584041  | -7.178675675  |
|  | O463                      | 6.175606975   | 1.516784727  | -6.189270373  |
|  | O464                      | 7.347532355   | 2.216649778  | -4.425329878  |
|  | O465                      | 0.876578375   | 8.772856775  | -3.294843319  |
|  | O466                      | 11.067102625  | -2.612323039 | 3.494108995   |
|  | O467                      | 12.773094208  | -5.394506288 | 4.781203006   |
|  | O468                      | 3.658906649   | -2.885673674 | -4.129900485  |
|  | O469                      | 4.602458316   | -4.728756212 | -4.942337448  |
|  | O470                      | 10.776236806  | -4.718992184 | -3.787338443  |
|  | O471                      | 9.548922657   | -3.728428473 | -5.404969349  |
|  | O472                      | 7.137743673   | -3.333883376 | -0.041360708  |
|  | O473                      | 7.119564958   | -5.406134041 | -0.925427679  |
|  | O474                      | 6.210643455   | -2.188209780 | -2.219017947  |
|  | O475                      | 8.470710166   | -6.687825422 | 2.855145387   |
|  | O476                      | 6.763837413   | -4.444445711 | 2.550795611   |
|  | O477                      | -3.786883225  | 5.768208712  | -0.643116600  |
|  | O478                      | 11.721458025  | -5.932468249 | -1.100806360  |
|  | O479                      | 9.245902158   | -6.644977312 | 0.173802374   |
|  | S480                      | 0.717380565   | 3.630219006  | 5.690562410   |
|  | S481                      | 1.832616673   | 3.050756337  | 2.092614783   |
|  | S482                      | 5.235153742   | 0.688518405  | -1.233100395  |
|  | S483                      | 1.442905427   | 0.062027870  | 4.031011200   |
|  | S484                      | 1.546033379   | 0.416499180  | -0.468534579  |
|  | S485                      | 5.862783227   | 3.186661337  | 1.553032695   |
|  | S486                      | 4.263081158   | -2.491385655 | 0.472899057   |
|  | S487                      | 4.233639206   | 2.122517500  | 4.783612626   |
|  | S488                      | 7.061492497   | -0.472510526 | 1.749184145   |
|  | S489                      | 4.602279444   | -1.825254397 | 4.197620514   |
|  | D 35(1)                   |               |              |               |
|  | dissociated               |               |              |               |
|  | Fe( 139)                  | 0.547         | -2.400       |               |
|  | Fe( 140)                  | 0.366         | -0.888       |               |
|  | Fe( 141)                  | 0.526         | -2.383       |               |
|  | Fe( 142)                  | 0.566         | 2.808        |               |
|  | Fe( 143)                  | 0.606         | 3.201        |               |
|  | Fe( 144)                  | 0.527         | 2.351        |               |
|  | Fe( 145)                  | 0.348         | -1.537       |               |
|  | bm2cnx2b6x2hn2n2xd135te 2 | 53124.81      |              |               |
|  | C1                        | -2.325872498  | -1.786084854 | -8.943882048  |
|  | C2                        | -1.270338086  | -1.538024785 | -10.026184000 |
|  | C3                        | -4.679156695  | -1.501402059 | -8.297225622  |
|  | C4                        | -5.016612607  | -2.918456922 | -7.838145940  |
|  | C5                        | -5.113048506  | -5.294967059 | -8.386450093  |
|  | C6                        | -4.128974793  | -5.855199027 | -7.354925178  |
|  | C7                        | -1.862639375  | -5.743361085 | -6.431217450  |
|  | C8                        | -2.115359044  | -5.096818637 | -5.065683070  |
|  | C9                        | -2.795655159  | -3.102685926 | -3.835263704  |
|  | C10                       | -4.013854736  | -3.685033320 | -3.102348078  |
|  | C11                       | -6.223339426  | -4.692267975 | -3.268036347  |
|  | C12                       | -6.024187032  | -6.136748426 | -2.787759479  |
|  | C13                       | -5.368599089  | -8.414345221 | -3.411457522  |
|  | C14                       | -4.169969602  | -8.920621509 | -2.600752592  |
|  | C15                       | -1.780313521  | -8.668190291 | -2.091477368  |
|  | C16                       | -1.339087387  | -7.881083946 | -0.855282040  |
|  | C17                       | -1.705388603  | -5.814332632 | 0.466690620   |
|  | C18                       | -2.816437598  | -5.736224593 | 1.530445745   |
|  | C19                       | -1.301880378  | -4.436353123 | -0.120462986  |
|  | C20                       | -1.110365769  | -3.375555702 | 0.964569215   |
|  | C21                       | -0.040190449  | -4.563174804 | -0.982548008  |

|     |               |               |              |
|-----|---------------|---------------|--------------|
| C22 | -5.179726721  | -5.229003538  | 2.027704923  |
| C23 | -5.812772884  | -6.611211657  | 2.278056941  |
| C24 | -6.210607014  | -4.180474533  | 1.544786518  |
| C25 | -7.456098293  | -4.179082901  | 2.438862852  |
| C26 | -5.580917960  | -2.781620424  | 1.499715111  |
| C27 | -6.783032425  | -8.636394392  | 1.356772982  |
| C28 | -6.003175446  | -9.554020026  | 2.280562013  |
| C29 | 7.458496842   | -10.996547353 | -1.902940035 |
| C30 | 7.515344750   | -9.877541835  | -0.862136534 |
| C31 | 6.217301253   | -8.859956438  | 1.019025983  |
| C32 | 6.258321232   | -9.643132821  | 2.345714682  |
| C33 | 4.874645001   | -8.129546231  | 0.834450209  |
| C34 | 4.587091764   | -7.090329554  | 1.922109992  |
| C35 | 3.404261186   | -6.202077930  | 1.536011784  |
| C36 | 1.996471608   | -4.793064070  | 3.054003083  |
| C37 | 7.237174195   | -9.762306637  | 4.587890271  |
| C38 | 6.560391239   | -9.012956544  | 5.715096590  |
| C39 | -0.984281804  | 1.061823378   | -5.802796830 |
| C40 | -2.231139274  | 1.655863672   | -5.125678734 |
| C41 | 0.009021282   | 0.651544009   | -4.690383976 |
| C42 | 1.190312893   | -0.234582037  | -5.139554640 |
| C43 | 2.440946814   | 0.525859426   | -5.578976494 |
| C44 | -3.308010475  | 3.769945094   | -4.490043948 |
| C45 | -4.727624429  | 3.725738100   | -5.071174950 |
| C46 | -2.863930784  | 5.227774221   | -4.253734834 |
| C47 | -6.226900236  | 2.662727303   | -6.691290585 |
| C48 | -6.823151643  | 1.419213746   | -6.013351838 |
| C49 | -6.416025410  | -0.501222184  | -4.529139668 |
| C50 | -6.459277235  | -0.388529039  | -3.004878001 |
| C51 | -5.820403564  | 0.818843851   | -0.969857371 |
| C52 | -7.238725779  | 1.103465888   | -0.420375175 |
| C53 | -4.984075503  | 2.023110379   | -0.513236446 |
| C54 | -3.518693487  | 1.999071227   | -0.795145835 |
| C55 | -2.603955154  | 0.999392783   | -1.017875103 |
| C56 | -1.486252931  | 2.910760308   | -0.899329623 |
| C57 | -9.231817405  | 2.521082591   | -0.787997045 |
| C58 | -10.259534042 | 1.437133890   | -0.472626088 |
| C59 | -9.728066771  | 3.417003030   | -1.947334865 |
| C60 | -10.737238106 | 4.473139071   | -1.606116415 |
| C61 | -11.833676381 | 4.450535089   | -0.765962186 |
| C62 | -11.660301404 | 6.425260396   | -1.757576871 |
| C63 | 2.343968905   | -4.613063497  | 8.279175750  |
| C64 | 3.639079176   | -5.399639062  | 8.202238964  |
| C65 | 1.924601793   | -4.299320257  | 6.818655304  |
| C66 | 0.617231488   | -3.548796537  | 6.730773760  |
| C67 | -0.613827195  | -4.227166014  | 6.657583100  |
| C68 | 0.592925409   | -2.141369755  | 6.740229870  |
| C69 | -1.825316564  | -3.530667351  | 6.596676530  |
| C70 | -0.608129835  | -1.432706838  | 6.694015373  |
| C71 | -1.817246587  | -2.129561099  | 6.621628917  |
| C72 | 0.163057514   | 3.527360382   | 8.448651477  |
| C73 | -0.875655827  | 4.633681569   | 8.228346229  |
| C74 | 0.287752553   | 2.660301165   | 7.185984773  |
| C75 | -1.248576265  | 7.045711900   | 7.926328474  |
| C76 | -1.790734923  | 7.198731792   | 6.503517288  |
| C77 | -1.602636615  | 6.465610713   | 4.148072460  |
| C78 | -2.651049014  | 5.364062697   | 3.881311433  |
| C79 | -0.359362886  | 6.354764875   | 3.244774834  |
| C80 | -0.570484973  | 6.378415088   | 1.728610223  |
| C81 | -1.053924013  | 7.701672793   | 1.113082219  |
| C82 | -3.286598237  | 8.777564909   | 1.368135821  |
| C83 | -3.449306293  | 3.111508329   | 4.367338076  |
| C84 | -4.711821051  | 3.239742324   | 5.237231306  |
| C85 | -2.834353749  | 1.728062078   | 4.636813042  |
| C86 | -5.527401127  | 3.715017774   | 7.487769882  |
| C87 | -6.534353841  | 4.829558752   | 7.748691230  |
| C88 | -7.346807176  | 7.071011748   | 7.145964661  |
| C89 | -8.772725828  | 6.969862544   | 6.565305952  |
| C90 | -6.641489396  | 8.361412253   | 6.678673051  |
| C91 | -6.436662327  | 8.393320600   | 5.168702428  |
| C92 | -10.259079006 | 5.830233484   | 4.980687098  |
| C93 | -11.381152692 | 5.494825604   | 5.955446800  |
| C94 | -10.149754879 | 4.724434139   | 3.897349953  |

|       |              |              |               |
|-------|--------------|--------------|---------------|
| C95   | -9.139225435 | 5.082459383  | 2.832047615   |
| C96   | -9.492251779 | 5.944564341  | 1.781029701   |
| C97   | -7.811269514 | 4.630127761  | 2.900321174   |
| C98   | -8.548479355 | 6.369145780  | 0.842932928   |
| C99   | -6.846560649 | 5.061483830  | 1.983267548   |
| C100  | -7.228515117 | 5.933151974  | 0.965356564   |
| C101  | 9.739047499  | 4.283853309  | -1.057233193  |
| C102  | 8.472293345  | 4.307390092  | -1.894024986  |
| C103  | 5.993835922  | 4.355746652  | -1.816037499  |
| C104  | 5.171104891  | 5.603219826  | -1.479214615  |
| C105  | 3.902120838  | 6.759150197  | 0.263524901   |
| C106  | 4.027271332  | 7.155621641  | 1.730904108   |
| C107  | 4.883732085  | 6.683767117  | 3.975551984   |
| C108  | 6.193543692  | 7.323303853  | 4.384122584   |
| C109  | 5.485997703  | 6.078659903  | -6.005974839  |
| C110  | 4.068938174  | 6.656887570  | -6.081408736  |
| C111  | 5.397542203  | 4.547572675  | -5.805285547  |
| C112  | 6.744866809  | 3.864790395  | -6.101213014  |
| C113  | 6.736932797  | 2.435668491  | -5.606456217  |
| C114  | 2.077631651  | 7.371356129  | -4.854082615  |
| C115  | 1.943119580  | 8.492027988  | -3.842903223  |
| C116  | 1.007602449  | 6.258601262  | -4.739336388  |
| C117  | 1.301764848  | 5.296568774  | -3.618480372  |
| C118  | 0.943439113  | 5.600137701  | -2.294773609  |
| C119  | 2.040963340  | 4.126199480  | -3.866431568  |
| C120  | 1.361917980  | 4.776855973  | -1.244167688  |
| C121  | 2.457435151  | 3.304305862  | -2.814144410  |
| C122  | 2.137144522  | 3.640852584  | -1.496916792  |
| C123  | 10.872302562 | -1.655402999 | 1.274461775   |
| C124  | 11.083028563 | -2.806791200 | 2.270258003   |
| C125  | 10.086321887 | -2.082480983 | 0.025069400   |
| C126  | 9.680806240  | -0.972953726 | -0.896000121  |
| C127  | 10.502560216 | -0.222008926 | -1.712036857  |
| C128  | 8.390410775  | 0.310395494  | -2.106555873  |
| C129  | 11.622106766 | -5.142668372 | 2.685215761   |
| C130  | 12.690346146 | -4.823371868 | 3.708465792   |
| C131  | 4.321591265  | -3.858543771 | -3.891334453  |
| C132  | 4.939261929  | -4.242792298 | -2.576856485  |
| C133  | 6.342427376  | -3.560497805 | -2.321001235  |
| C134  | 7.333607450  | -3.960459091 | -3.451664058  |
| C135  | 8.770596125  | -3.493987884 | -3.163226469  |
| C136  | 9.787034156  | -4.062614053 | -4.112261833  |
| C137  | 6.888472369  | -4.176227867 | -0.996858231  |
| C138  | 3.915769679  | 0.530421441  | 1.918129815   |
| Fe139 | 5.603517183  | 1.052027162  | 0.975514486   |
| Fe140 | 2.036750058  | 0.641072195  | 1.797032175   |
| Fe141 | 3.570875412  | 0.159186665  | 3.849913435   |
| Fe142 | 3.970485082  | 2.413974555  | 2.503578521   |
| Fe143 | 1.939842474  | 2.242105447  | 4.250417186   |
| Fe144 | 4.935037411  | -1.182333471 | 2.111723479   |
| Fe145 | 3.708899952  | -0.336885526 | -0.064422293  |
| H146  | 0.254495371  | -2.590163715 | -9.168979288  |
| H147  | 0.351119929  | -0.980693564 | -8.910884044  |
| H148  | -3.756334437 | -0.906276305 | -10.131717011 |
| H149  | -1.425608579 | -0.533275989 | -10.451411082 |
| H150  | -1.481006981 | -2.247260483 | -10.845819249 |
| H151  | -4.433473161 | -0.932652491 | -7.389458224  |
| H152  | -4.526254117 | -3.678678131 | -9.681858291  |
| H153  | -5.577288910 | -1.057621684 | -8.748422506  |
| H154  | -5.059439116 | -5.908181473 | -9.295346532  |
| H155  | -2.656802293 | -4.606771852 | -8.053776319  |
| H156  | -6.119093820 | -5.400709087 | -7.959604368  |
| H157  | -1.951652492 | -3.160257870 | -3.134778790  |
| H158  | -2.481467134 | -3.266494144 | -5.959352594  |
| H159  | -0.875373701 | -5.436749427 | -6.801547265  |
| H160  | -6.529137541 | -4.097229917 | -2.398773800  |
| H161  | -5.020248679 | -3.948397716 | -4.891724606  |
| H162  | -1.855705303 | -6.829049595 | -6.276787192  |
| H163  | -2.975676714 | -2.042418053 | -4.066298536  |
| H164  | -5.167345065 | -6.654633688 | -4.600356179  |
| H165  | -7.038748434 | -4.678245090 | -4.004183962  |
| H166  | -0.177104899 | -5.277084906 | -1.806873797  |
| H167  | 0.220945528  | -3.587994284 | -1.421971047  |

|      |               |              |              |
|------|---------------|--------------|--------------|
| H168 | 0.817848620   | -4.889322990 | -0.373905712 |
| H169 | -2.132107941  | -4.107696691 | -0.766858523 |
| H170 | -5.355092568  | -8.933762976 | -4.380945247 |
| H171 | -4.714049315  | -2.739039152 | 0.825282708  |
| H172 | -6.026155466  | -6.977721274 | 0.237064639  |
| H173 | -7.977377614  | -5.147662612 | 2.429618947  |
| H174 | -0.920277214  | -2.397335373 | 0.499507150  |
| H175 | -0.244275108  | -3.593816673 | 1.605134211  |
| H176 | 1.575187046   | -5.276254597 | 8.719852796  |
| H177 | -6.322622573  | -2.047582629 | 1.151910878  |
| H178 | -8.162456963  | -3.408754953 | 2.096706921  |
| H179 | -5.250438888  | -2.477583660 | 2.506251342  |
| H180 | -7.184799820  | -3.952163589 | 3.482573445  |
| H181 | -6.520102985  | -4.460075702 | 0.520863701  |
| H182 | -4.787745286  | -4.919131107 | 3.007307700  |
| H183 | -4.163535437  | -4.973181143 | 0.151443625  |
| H184 | -1.996254410  | -3.262232140 | 1.606394575  |
| H185 | -1.827495352  | 1.705867869  | 4.189714456  |
| H186 | -3.467916621  | 0.986149084  | 4.127414059  |
| H187 | -2.874929934  | 0.489938380  | 6.155059261  |
| H188 | -3.748654572  | -1.974089059 | 6.475134999  |
| H189 | -0.607036643  | -0.342074774 | 6.683640583  |
| H190 | 1.532133465   | -1.583595436 | 6.755352179  |
| H191 | -0.631323270  | -5.320237849 | 6.641452976  |
| H192 | -2.777893167  | -6.500018791 | -1.257378500 |
| H193 | -0.950212325  | -8.625814166 | -2.811791282 |
| H194 | -1.910540705  | -9.713784767 | -1.783198986 |
| H195 | -2.940049737  | -7.436914763 | -3.385252395 |
| H196 | -6.267402975  | -8.729521363 | -2.866438351 |
| H197 | -2.771981486  | -4.073121215 | 6.525263248  |
| H198 | -0.845187030  | -6.254915646 | 0.986267272  |
| H199 | -7.812201079  | -8.538444396 | 1.737172860  |
| H200 | -6.823577392  | -9.128797935 | 0.372203979  |
| H201 | -4.904764857  | -9.364687079 | 2.315185854  |
| H202 | 8.300800873   | -9.907505537 | 4.829722574  |
| H203 | 4.487918879   | 0.434310250  | -5.518607656 |
| H204 | 5.111194686   | -5.449226333 | -4.642623478 |
| H205 | 6.917485414   | 3.853608432  | -7.187429962 |
| H206 | 7.563309725   | 4.424381938  | -5.626550034 |
| H207 | 4.627618536   | 4.120656147  | -6.465911897 |
| H208 | 2.879194907   | 9.079758914  | -3.688797162 |
| H209 | 5.901680209   | 6.257647965  | -7.010050490 |
| H210 | 0.389265250   | 1.564691849  | -4.204741711 |
| H211 | 0.883583359   | -0.871629746 | -5.987791626 |
| H212 | 3.923347957   | 6.676946597  | -4.007809160 |
| H213 | 1.923924628   | 7.869242282  | -5.833378738 |
| H214 | 6.064912666   | 6.609067288  | -4.082354401 |
| H215 | 3.674824342   | -0.886039909 | -4.682635747 |
| H216 | 5.076060920   | 4.342229627  | -4.772775790 |
| H217 | 7.301040599   | 6.549989285  | -5.168721165 |
| H218 | -0.700475365  | 1.850936337  | -7.691570022 |
| H219 | -0.564577022  | 0.098015797  | -3.932681596 |
| H220 | 7.740500831   | 3.046659876  | -4.028907823 |
| H221 | 1.452888071   | -0.924385709 | -4.324854358 |
| H222 | -5.480378701  | -0.111175414 | -0.490104130 |
| H223 | -2.727378005  | -0.072756575 | -1.109463621 |
| H224 | -7.440874778  | -0.723448082 | -4.852772741 |
| H225 | -4.975541501  | 0.926231436  | -5.196248151 |
| H226 | -7.642059510  | 2.099718728  | -2.160888283 |
| H227 | -12.235968782 | 3.690826505  | -0.105620930 |
| H228 | -10.193445694 | 0.545139621  | -1.142192106 |
| H229 | -10.096860735 | 2.773421817  | -2.766290047 |
| H230 | -9.061250375  | 3.125326410  | 0.117035326  |
| H231 | -11.900057902 | 7.450980368  | -2.025489812 |
| H232 | -5.125831651  | 2.104700502  | 0.577460929  |
| H233 | -5.417904568  | 2.936845629  | -0.951847429 |
| H234 | -13.227278799 | 6.026320984  | -0.372707376 |
| H235 | -8.849933744  | 3.948245196  | -2.346928192 |
| H236 | -5.113751378  | 1.179823580  | -2.968225265 |
| H237 | -5.800483201  | -1.372918923 | -4.798459598 |
| H238 | -6.928770112  | 3.488158211  | -6.516802158 |
| H239 | -0.667158249  | 3.623387823  | -0.900319070 |
| H240 | -6.185107124  | 2.479758713  | -7.772964826 |

|      |               |               |              |
|------|---------------|---------------|--------------|
| H241 | 2.646652668   | -3.590780968  | 10.030254046 |
| H242 | 1.772178723   | -2.757648577  | 8.929124710  |
| H243 | -1.570455391  | 3.981160950   | 4.989673502  |
| H244 | -3.791259048  | 3.134878633   | 3.322020266  |
| H245 | -3.612062981  | 4.144287557   | 6.709079782  |
| H246 | -3.190339459  | 4.148614376   | -0.600719384 |
| H247 | -3.735853376  | 5.908923577   | -1.615484711 |
| H248 | -4.744689937  | 5.812155325   | -0.395045918 |
| H249 | -1.869946746  | 5.228325260   | -3.786479553 |
| H250 | -2.806259005  | 5.765965046   | -5.214978547 |
| H251 | -5.687977337  | 8.450596579   | 7.219398381  |
| H252 | -7.281376603  | 9.209380766   | 6.956491841  |
| H253 | -4.370282512  | 7.993160970   | 5.354447764  |
| H254 | -5.036467977  | 8.011950682   | 3.733047727  |
| H255 | -3.391388554  | 10.659559510  | 2.163542300  |
| H256 | -0.606969961  | 7.837046236   | 0.115892662  |
| H257 | -8.842240412  | 7.032176136   | 0.024657349  |
| H258 | -7.499672459  | 3.928621880   | 3.679039290  |
| H259 | -5.059134440  | 7.778401690   | 1.020594729  |
| H260 | 0.169489257   | 5.419247166   | 3.486179530  |
| H261 | -0.434581079  | 5.813234269   | 5.814263002  |
| H262 | -1.225631689  | 5.552451892   | 1.410652017  |
| H263 | -4.080801935  | 2.675999923   | -6.687028407 |
| H264 | -0.695925207  | 7.960823112   | 8.177868008  |
| H265 | -1.563157735  | 3.417822849   | -5.796011548 |
| H266 | 0.316269102   | 7.180558023   | 3.523594456  |
| H267 | -5.804835531  | 4.752761834   | 2.092834358  |
| H268 | -4.674749928  | 5.578599950   | -3.626121818 |
| H269 | -2.125145726  | 6.991351252   | 8.587258252  |
| H270 | -1.828570913  | 10.210004110  | 1.582541686  |
| H271 | -5.207630437  | 9.467287552   | 1.331754959  |
| H272 | 0.635293541   | 1.970185707   | -6.691925600 |
| H273 | -1.330242839  | 0.134716908   | -6.296586132 |
| H274 | -10.521081907 | 6.300730430   | 1.690627609  |
| H275 | -3.419944825  | 3.298153096   | -3.498368471 |
| H276 | -2.126851709  | 7.412868688   | 3.964522232  |
| H277 | -0.707212508  | 8.538231424   | 1.733774404  |
| H278 | 0.416645784   | 6.169538472   | 1.294823719  |
| H279 | -2.969089099  | 6.993159964   | 0.461449159  |
| H280 | -6.113768121  | 2.807251249   | 7.281531624  |
| H281 | -5.763323495  | 5.942764034   | 6.208026894  |
| H282 | -7.493166965  | 7.136869504   | 8.234309321  |
| H283 | -4.982989022  | 3.556504869   | 8.428648761  |
| H284 | -8.201721009  | 5.387934426   | 5.409107445  |
| H285 | 9.566638233   | 4.792347043   | -0.098001684 |
| H286 | 9.925424375   | 3.214350719   | -0.824522994 |
| H287 | 10.280239656  | -0.905953628  | 1.820016305  |
| H288 | 11.715206733  | 4.722847789   | -1.299736479 |
| H289 | 10.903562022  | 4.538426120   | -2.709194589 |
| H290 | 1.071483129   | 1.911741361   | 7.362028486  |
| H291 | -1.157103707  | 2.351542284   | 9.465485062  |
| H292 | 0.619650090   | 6.044584322   | 8.204389954  |
| H293 | -0.668524837  | 2.149594278   | 7.006283595  |
| H294 | -0.179177917  | 3.217368403   | 10.449415292 |
| H295 | 4.724124969   | 5.763188274   | 4.558784425  |
| H296 | 1.141602138   | 3.986041837   | 8.660702559  |
| H297 | 4.065378423   | -8.877688340  | 0.796372295  |
| H298 | 7.034544276   | -8.129491328  | 0.987957381  |
| H299 | 5.207763387   | 5.515594695   | 2.227205937  |
| H300 | 1.069187681   | -3.382937931  | 4.201463327  |
| H301 | 4.156020949   | 7.643347859   | -0.335875200 |
| H302 | 3.041867127   | 2.403417250   | -3.014310211 |
| H303 | 2.832323785   | 6.560460433   | 0.090136556  |
| H304 | 2.484868210   | -6.790499890  | 1.425699539  |
| H305 | 4.821291897   | 4.786140825   | 0.358685440  |
| H306 | 3.597692278   | -5.731625222  | 0.557519721  |
| H307 | 4.914176442   | -7.635532799  | -0.149906485 |
| H308 | 5.463814951   | -6.443118137  | 2.073574813  |
| H309 | 4.375687835   | -7.582526571  | 2.884910438  |
| H310 | 0.979414462   | 5.727508890   | -5.702173925 |
| H311 | 5.741044366   | -10.546611864 | -0.231802936 |
| H312 | 7.312272980   | -10.502446088 | -2.875627188 |
| H313 | 2.474309991   | 3.031038045   | -0.656915504 |



|       |               |               |              |
|-------|---------------|---------------|--------------|
| H314  | 6.693323714   | -12.730075877 | -1.099910593 |
| H315  | 6.065872197   | -12.358562382 | -2.565599263 |
| H316  | 3.896884763   | -4.396193348  | 2.536125952  |
| H317  | 1.099178188   | 5.003339259   | -0.209063521 |
| H318  | 2.297034116   | 3.853206209   | -4.892656424 |
| H319  | 10.873879758  | -6.229076234  | -0.694857345 |
| H320  | 10.700604114  | -2.794407273  | -0.554839372 |
| H321  | 8.494228002   | -6.091372667  | -0.166221332 |
| H322  | 11.437843651  | -5.550061229  | -1.962217293 |
| H323  | 6.802279917   | 7.730126590   | 3.540360140  |
| H324  | 6.930542610   | -4.060023203  | 1.648218988  |
| H325  | 5.051379282   | -5.334497629  | -2.496992700 |
| H326  | 7.335229990   | 4.320772443   | -0.185591468 |
| H327  | 7.321202209   | -5.057298072  | -3.555216045 |
| H328  | 9.955667086   | 1.230629329   | -3.189996433 |
| H329  | 7.530200621   | 0.780049547   | -2.565799561 |
| H330  | 8.463113971   | -11.452238985 | -1.926416323 |
| H331  | 2.607257824   | -2.886499565  | 3.555080334  |
| H332  | 7.907972069   | -5.876899197  | 2.884067704  |
| H333  | 6.579871638   | -3.664008250  | 3.108508368  |
| H334  | 7.592160871   | -8.236755645  | 3.110878291  |
| H335  | 1.168950834   | -6.678539577  | 3.013044063  |
| H336  | 10.267391801  | -4.132464236  | -5.940378481 |
| H337  | 8.803961457   | -2.395799943  | -3.215212171 |
| H338  | 9.081283344   | -3.794724550  | -2.156424265 |
| H339  | 6.990111925   | -3.516012410  | -4.397382788 |
| H340  | 5.478198591   | 3.444038142   | -1.475114068 |
| H341  | 0.357408846   | 6.500703448   | -2.095355052 |
| H342  | 0.036631779   | 6.756834340   | -4.595413806 |
| H343  | 4.278453610   | -3.888264101  | -1.774983174 |
| H344  | 8.846318616   | -6.677751668  | 1.939666153  |
| H345  | 9.013380996   | -7.554153023  | -0.140553586 |
| H346  | 0.080052032   | -5.427137771  | 3.480544257  |
| H347  | 11.581297755  | -0.199596843  | -1.815286466 |
| H348  | 9.182973960   | -2.621130280  | 0.336699676  |
| H349  | 6.123259147   | 4.316101392   | -2.899541289 |
| H350  | 4.073482951   | 7.388908767   | 4.225831560  |
| H351  | 1.848045089   | -5.259889591  | 6.286297266  |
| H352  | 2.727899576   | -3.712377117  | 6.345200177  |
| H353  | 12.614016785  | -0.691130252  | 1.770135166  |
| H354  | 12.790521361  | -1.740777838  | 0.527720750  |
| H355  | 11.988382530  | -5.993120615  | 2.088038106  |
| H356  | 11.385941602  | -4.234869790  | 0.771619435  |
| H357  | 13.434892106  | -4.055802187  | 3.384432210  |
| H358  | 10.698870676  | -5.466862156  | 3.192108934  |
| H359  | 4.553877375   | -4.763530262  | 8.123580739  |
| H360  | -11.052881227 | 5.020538938   | 6.910366045  |
| H361  | 6.759920985   | -10.756636815 | 4.532522942  |
| H362  | 5.687641471   | -8.386929130  | 5.409708858  |
| H363  | -10.522997126 | 6.783516462   | 4.493709157  |
| H364  | -9.879377723  | 3.771549924   | 4.378039287  |
| H365  | -11.149114021 | 4.599450255   | 3.456079646  |
| H366  | 3.395864450   | -0.888296531  | -1.427889054 |
| H367  | -6.666225053  | 6.890626651   | -0.639826585 |
| H368  | 1.697735870   | -0.830614708  | 1.745949173  |
| H369  | 0.993378931   | -0.879757137  | -0.454096082 |
| H370  | -0.418188376  | 1.122089665   | -1.068116431 |
| Mo371 | 6.187682225   | -1.292672883  | -0.329244270 |
| N372  | 0.116741879   | -1.681226816  | -9.618426764 |
| N373  | -3.598429542  | -1.423328142  | -9.270258937 |
| N374  | -4.853584036  | -3.910776280  | -8.747463796 |
| N375  | -2.857329165  | -5.387714021  | -7.431307239 |
| N376  | -2.479488557  | -3.787974063  | -5.080602818 |
| N377  | -5.042024257  | -4.104921405  | -3.881206767 |
| N378  | -5.431500987  | -6.984018581  | -3.668500195 |
| N379  | -3.006317776  | -8.223071778  | -2.731677570 |
| N380  | -2.052273087  | -6.755479755  | -0.591285248 |
| N381  | -4.043418308  | -5.315504318  | 1.105861362  |
| N382  | -6.129701386  | -7.350531563  | 1.183451572  |
| N383  | 6.367462168   | -11.952657940 | -1.678496058 |
| N384  | 6.427446979   | -9.800786223  | -0.073152064 |
| N385  | 3.176855086   | -5.124049752  | 2.506908897  |
| N386  | 0.980406081   | -5.684570603  | 3.085761845  |

|      |               |               |              |
|------|---------------|---------------|--------------|
| N387 | 1.807143900   | -3.552219210  | 3.520732902  |
| N388 | 7.071764124   | -9.122120610  | 3.297218631  |
| N389 | -0.398654697  | 2.032446507   | -6.732363520 |
| N390 | 3.618907120   | -0.023705537  | -5.228247680 |
| N391 | -2.324541774  | 3.006724972   | -5.230448937 |
| N392 | -4.907588877  | 3.037418539   | -6.217469726 |
| N393 | -5.967944743  | 0.674966369   | -5.253400202 |
| N394 | -5.814573137  | 0.677053073   | -2.424950596 |
| N395 | -2.789311832  | 3.181313123   | -0.734975395 |
| N396 | -1.360348513  | 1.594714566   | -1.085061993 |
| N397 | -7.988253508  | 1.901417883   | -1.224620712 |
| N398 | -10.640782942 | 5.712090283   | -2.220483485 |
| N399 | -12.403941347 | 5.702118203   | -0.873587212 |
| N400 | 2.580189339   | -3.378551709  | 9.031417460  |
| N401 | -0.187999996  | 2.664224008   | 9.587227490  |
| N402 | -0.385611727  | 5.903709138   | 8.153203269  |
| N403 | -1.163435480  | 6.490210801   | 5.540968993  |
| N404 | -2.513056790  | 7.773552202   | 0.965293712  |
| N405 | -2.765798494  | 9.926085360   | 1.845930935  |
| N406 | -4.633333407  | 8.630234760   | 1.390973865  |
| N407 | -2.489126642  | 4.193277365   | 4.553984701  |
| N408 | -4.566849465  | 3.915688045   | 6.414157461  |
| N409 | -6.518569350  | 5.894691193   | 6.893025978  |
| N410 | -5.191234896  | 8.060404797   | 4.739335952  |
| N411 | -8.992784014  | 5.965220142   | 5.683292042  |
| N412 | 10.835891330  | 4.945778041   | -1.771790799 |
| N413 | 7.317282486   | 4.410425140   | -1.207792141 |
| N414 | 4.703901151   | 5.647493829   | -0.214594632 |
| N415 | 4.805809853   | 6.402516520   | 2.552306503  |
| N416 | 6.321915838   | 6.822290808   | -5.054487934 |
| N417 | 3.447702185   | 6.892963192   | -4.890394389 |
| N418 | 12.161359460  | -1.030455373  | 0.916316255  |
| N419 | 8.356065293   | -0.615788460  | -1.151694598 |
| N420 | 9.670481264   | 0.576520314   | -2.466700991 |
| N421 | 11.393468979  | -4.035293561  | 1.771496359  |
| N422 | -1.956036351  | -0.314328470  | 1.962612054  |
| N423 | -1.613433874  | 0.738356015   | 1.957799317  |
| O424 | -2.058686069  | -2.325118769  | -7.853735264 |
| O425 | -5.432187561  | -3.128305579  | -6.686877271 |
| O426 | -4.488702025  | -6.705840064  | -6.525246927 |
| O427 | -2.002035480  | -5.740779811  | -4.010424418 |
| O428 | -4.044967883  | -3.745276309  | -1.862996959 |
| O429 | -6.431408641  | -6.499003317  | -1.670591457 |
| O430 | -4.284764665  | -9.940355684  | -1.907986914 |
| O431 | -0.372777751  | -8.274554610  | -0.187166850 |
| O432 | -2.589724767  | -6.047054162  | 2.709518483  |
| O433 | -6.031064261  | -7.026226221  | 3.428494649  |
| O434 | -6.513453683  | -10.481848208 | 2.889835878  |
| O435 | 8.507268554   | -9.118743687  | -0.825886790 |
| O436 | 5.581562280   | -10.676450727 | 2.492050711  |
| O437 | 6.916434395   | -9.084573983  | 6.880357794  |
| O438 | -3.076779642  | 0.956998480   | -4.524794441 |
| O439 | 2.371567904   | 1.586129657   | -6.241948365 |
| O440 | -5.658644727  | 4.270200141   | -4.441887550 |
| O441 | -3.771852035  | 5.897390913   | -3.365404069 |
| O442 | -8.015709301  | 1.142212526   | -6.189415809 |
| O443 | -7.083125126  | -1.217556340  | -2.338466027 |
| O444 | -7.582465589  | 0.744436099   | 0.707852462  |
| O445 | -11.110664635 | 1.524160623   | 0.394220392  |
| O446 | 3.705126307   | -6.620376221  | 8.199386559  |
| O447 | -2.978479989  | -1.382619994  | 6.562508241  |
| O448 | -2.094537698  | 4.397518809   | 8.138188541  |
| O449 | -2.744321189  | 7.979002877   | 6.300850348  |
| O450 | -3.595346770  | 5.575900032   | 3.099882783  |
| O451 | -5.767562110  | 2.694969422   | 4.885706545  |
| O452 | -2.774905971  | 1.457343128   | 6.038104031  |
| O453 | -7.330448663  | 4.733090020   | 8.691017715  |
| O454 | -9.658338598  | 7.761843906   | 6.917906434  |
| O455 | -7.370730081  | 8.645585127   | 4.390854033  |
| O456 | -12.559172755 | 5.688207028   | 5.702577145  |
| O457 | -6.236633299  | 6.391129457   | 0.081179975  |
| O458 | 8.535541734   | 4.203216682   | -3.146042323 |
| O459 | 4.975442096   | 6.508940106   | -2.320234017 |

|      |              |              |              |
|------|--------------|--------------|--------------|
| O460 | 3.394118719  | 8.150680322  | 2.120825622  |
| O461 | 6.570100726  | 7.404612426  | 5.542228267  |
| O462 | 3.506683629  | 6.855723310  | -7.171092590 |
| O463 | 6.179444082  | 1.516215431  | -6.197815189 |
| O464 | 7.347751656  | 2.207637990  | -4.427687675 |
| O465 | 0.908206811  | 8.784671026  | -3.260577048 |
| O466 | 11.057496096 | -2.609411712 | 3.499512019  |
| O467 | 12.797570455 | -5.402795036 | 4.779423566  |
| O468 | 3.635645035  | -2.867294298 | -4.096476866 |
| O469 | 4.565385644  | -4.699369859 | -4.948611429 |
| O470 | 10.739868303 | -4.771064240 | -3.795540929 |
| O471 | 9.558072851  | -3.715961331 | -5.405549315 |
| O472 | 7.111249348  | -3.332755370 | -0.041550392 |
| O473 | 7.121483847  | -5.405039481 | -0.927707835 |
| O474 | 6.204863742  | -2.190205209 | -2.227551668 |
| O475 | 8.480192649  | -6.684848914 | 2.863654365  |
| O476 | 6.775822805  | -4.440921889 | 2.549589919  |
| O477 | -3.784338752 | 5.759518066  | -0.628903478 |
| O478 | 11.724391169 | -5.935072885 | -1.108289473 |
| O479 | 9.252123085  | -6.645116460 | 0.178276872  |
| S480 | 0.706843913  | 3.646666457  | 5.671844687  |
| S481 | 1.814402525  | 3.025289902  | 2.045983540  |
| S482 | 5.265582408  | 0.726527839  | -1.226100698 |
| S483 | 1.330229472  | 0.121957427  | 3.921879847  |
| S484 | 1.459322537  | 0.397447208  | -0.380643660 |
| S485 | 5.868386960  | 3.199791280  | 1.578986878  |
| S486 | 4.214576522  | -2.444547615 | 0.412064483  |
| S487 | 4.183928502  | 2.097490414  | 4.774301918  |
| S488 | 7.045303470  | -0.501286269 | 1.755207399  |
| S489 | 4.535689419  | -1.831219335 | 4.179096558  |

### Structure D 47(2)

| D 47(2)<br>associated |              | bm2cnx2b6x2hn2n2xd2tg.car_3 |                                        |
|-----------------------|--------------|-----------------------------|----------------------------------------|
| Fe( 139)              | 0.551 2.420  | C1                          | -2.398024928 -2.395509051 -8.794960133 |
| Fe( 140)              | 0.276 0.104  | C2                          | -1.338046315 -2.247606993 -9.892113810 |
| Fe( 141)              | 0.564 2.671  | C3                          | -4.730296838 -1.971801797 -8.153396744 |
| Fe( 142)              | 0.554 -2.684 | C4                          | -5.124592272 -3.337150701 -7.592815614 |
| Fe( 143)              | 0.618 3.209  | C5                          | -5.308527896 -5.743817764 -7.957260339 |
| Fe( 144)              | 0.497 -2.029 | C6                          | -4.342773567 -6.261365509 -6.887048978 |
| Fe( 145)              | 0.300 -0.116 | C7                          | -2.075224967 -6.161932783 -5.967015460 |
|                       |              | C8                          | -2.311456111 -5.401999520 -4.657116274 |
|                       |              | C9                          | -2.914735508 -3.298232524 -3.582597638 |
|                       |              | C10                         | -4.150743084 -3.782087349 -2.808656599 |
|                       |              | C11                         | -6.393231836 -4.720775324 -2.899857611 |
|                       |              | C12                         | -6.238748130 -6.132346195 -2.314738673 |
|                       |              | C13                         | -5.660960121 -8.468782397 -2.773053093 |
|                       |              | C14                         | -4.471390795 -8.967462334 -1.944106135 |
|                       |              | C15                         | -2.080062415 -8.731432266 -1.429767877 |
|                       |              | C16                         | -1.618251741 -7.872162662 -0.249323235 |
|                       |              | C17                         | -1.920480013 -5.701830871 0.914206169  |
|                       |              | C18                         | -3.022996909 -5.497302983 1.967043741  |
|                       |              | C19                         | -1.464374706 -4.385048269 0.224534477  |
|                       |              | C20                         | -1.235069291 -3.251583590 1.229186570  |
|                       |              | C21                         | -0.208235416 -4.631923943 -0.620303097 |
|                       |              | C22                         | -5.368270242 -4.879968969 2.420304337  |
|                       |              | C23                         | -6.049662818 -6.218417582 2.771940842  |
|                       |              | C24                         | -6.361471845 -3.834260435 1.862969501  |
|                       |              | C25                         | -7.607573288 -3.724935225 2.751567196  |
|                       |              | C26                         | -5.686175210 -2.464818186 1.715194961  |
|                       |              | C27                         | -7.085260018 -8.276625045 2.009279679  |
|                       |              | C28                         | -6.333328835 -9.141336634 3.001463705  |
|                       |              | C29                         | 7.071763811 -11.358969932 -1.041152576 |
|                       |              | C30                         | 7.166533578 -10.167615482 -0.086535697 |
|                       |              | C31                         | 5.906778096 -8.961492937 1.704722972   |
|                       |              | C32                         | 5.924431463 -9.639743756 3.088728378   |
|                       |              | C33                         | 4.595313701 -8.191681964 1.461277873   |
|                       |              | C34                         | 4.345137810 -7.072722393 2.475122480   |
|                       |              | C35                         | 3.186559031 -6.178701812 2.034552745   |
|                       |              | C36                         | 1.829336099 -4.603770601 3.431630578   |
|                       |              | C37                         | 6.903912875 -9.619228391 5.333464820   |
|                       |              | C38                         | 6.266557078 -8.782436255 6.422333715   |
|                       |              | C39                         | -0.955640665 0.650224776 -5.882368083  |

|      |               |              |              |
|------|---------------|--------------|--------------|
| C40  | -2.181229325  | 1.333168302  | -5.251112057 |
| C41  | 0.014065501   | 0.278461804  | -4.735840655 |
| C42  | 1.171902363   | -0.672984930 | -5.108313019 |
| C43  | 2.446320713   | 0.007110212  | -5.607615977 |
| C44  | -3.184892555  | 3.528392376  | -4.786224219 |
| C45  | -4.603647816  | 3.501065948  | -5.373174945 |
| C46  | -2.674405521  | 4.976806962  | -4.657868212 |
| C47  | -6.150249073  | 2.340779792  | -6.881278353 |
| C48  | -6.785942277  | 1.177426906  | -6.103025754 |
| C49  | -6.440525571  | -0.628082107 | -4.463047276 |
| C50  | -6.473264657  | -0.390115327 | -2.952398992 |
| C51  | -5.790702370  | 0.961844641  | -1.024938524 |
| C52  | -7.201489911  | 1.349367612  | -0.517079783 |
| C53  | -4.903467978  | 2.163393698  | -0.663127861 |
| C54  | -3.437303149  | 2.057483136  | -0.933485255 |
| C55  | -2.559599652  | 1.008651308  | -1.054463813 |
| C56  | -1.379857802  | 2.889689785  | -1.165547256 |
| C57  | -9.150136592  | 2.781570318  | -1.017546021 |
| C58  | -10.193142473 | 1.755232377  | -0.578737269 |
| C59  | -9.640162523  | 3.576598381  | -2.250705699 |
| C60  | -10.602771927 | 4.696487723  | -1.979615753 |
| C61  | -11.672301316 | 4.777832856  | -1.109260191 |
| C62  | -11.456243860 | 6.667731371  | -2.244648687 |
| C63  | 2.199719991   | -4.043196164 | 8.613453649  |
| C64  | 3.452745266   | -4.897514874 | 8.594448972  |
| C65  | 1.774512643   | -3.833397323 | 7.135536332  |
| C66  | 0.493598178   | -3.044331560 | 7.004158033  |
| C67  | -0.760820159  | -3.682729404 | 6.977241306  |
| C68  | 0.521234592   | -1.641594336 | 6.916003425  |
| C69  | -1.946411923  | -2.947903847 | 6.867937253  |
| C70  | -0.652809582  | -0.894429427 | 6.817524960  |
| C71  | -1.886280458  | -1.550577176 | 6.788124914  |
| C72  | 0.285342158   | 4.161363836  | 8.179824711  |
| C73  | -0.719124950  | 5.279733489  | 7.869601667  |
| C74  | 0.381220684   | 3.192382971  | 6.992150902  |
| C75  | -1.018748319  | 7.672027866  | 7.377906750  |
| C76  | -1.542801325  | 7.737106531  | 5.942323647  |
| C77  | -1.377410515  | 6.818470425  | 3.653652181  |
| C78  | -2.463081015  | 5.737001038  | 3.467950003  |
| C79  | -0.142841429  | 6.589012542  | 2.761220341  |
| C80  | -0.368262503  | 6.483810116  | 1.249070960  |
| C81  | -0.784818365  | 7.769396580  | 0.513297919  |
| C82  | -2.972671221  | 8.954145797  | 0.666776692  |
| C83  | -3.339070743  | 3.548330581  | 4.086254381  |
| C84  | -4.590635676  | 3.801053397  | 4.949402773  |
| C85  | -2.791778366  | 2.154257996  | 4.431796718  |
| C86  | -5.388444555  | 4.463642864  | 7.162341559  |
| C87  | -6.337319793  | 5.643365016  | 7.348373558  |
| C88  | -7.079059338  | 7.856218551  | 6.570985194  |
| C89  | -8.516214973  | 7.756142970  | 6.016335816  |
| C90  | -6.342123598  | 9.080103435  | 5.985525697  |
| C91  | -6.138621541  | 8.964367207  | 4.478771196  |
| C92  | -10.050092926 | 6.565479960  | 4.516867532  |
| C93  | -11.171164519 | 6.318789840  | 5.519305967  |
| C94  | -9.986567776  | 5.388790567  | 3.507955177  |
| C95  | -8.961881219  | 5.626674360  | 2.423213473  |
| C96  | -9.283049365  | 6.409044190  | 1.303829285  |
| C97  | -7.655047210  | 5.125647891  | 2.532971998  |
| C98  | -8.325933589  | 6.703557182  | 0.329959371  |
| C99  | -6.676600723  | 5.429736842  | 1.580065213  |
| C100 | -7.025548747  | 6.222148431  | 0.489640207  |
| C101 | 9.871580824   | 3.840352249  | -1.368551510 |
| C102 | 8.608555131   | 3.846151789  | -2.210497648 |
| C103 | 6.128664155   | 3.981222745  | -2.136259252 |
| C104 | 5.360264658   | 5.289153432  | -1.910540347 |
| C105 | 4.156420398   | 6.654836951  | -0.276412288 |
| C106 | 4.276194468   | 7.142602171  | 1.164529898  |
| C107 | 5.104673447   | 6.797084218  | 3.444917910  |
| C108 | 6.434884922   | 7.425010398  | 3.804884724  |
| C109 | 5.678578379   | 5.399155569  | -6.453217752 |
| C110 | 4.280680084   | 6.015185847  | -6.572263687 |
| C111 | 5.546301319   | 3.893498754  | -6.130908840 |
| C112 | 6.866693370   | 3.143638154  | -6.384642199 |

|       |              |              |               |
|-------|--------------|--------------|---------------|
| C113  | 6.808476959  | 1.760518398  | -5.775509723  |
| C114  | 2.323906550  | 6.903718577  | -5.407203615  |
| C115  | 2.221581622  | 8.100919537  | -4.483756043  |
| C116  | 1.212690715  | 5.842611221  | -5.226397931  |
| C117  | 1.469496357  | 4.971908786  | -4.026148457  |
| C118  | 1.125303240  | 5.402104139  | -2.733509797  |
| C119  | 2.175710490  | 3.764286163  | -4.171539170  |
| C120  | 1.533691627  | 4.666104413  | -1.617368653  |
| C121  | 2.579228802  | 3.028967637  | -3.054406272  |
| C122  | 2.283302440  | 3.495512035  | -1.769777272  |
| C123  | 10.783791859 | -1.917516654 | 1.409284088   |
| C124  | 10.955270395 | -3.002932112 | 2.482349062   |
| C125  | 9.983270347  | -2.411096234 | 0.193133388   |
| C126  | 9.603052389  | -1.364458488 | -0.808948805  |
| C127  | 10.436207812 | -0.717617628 | -1.699233051  |
| C128  | 8.336859977  | -0.131778923 | -2.098042467  |
| C129  | 11.431552998 | -5.315651903 | 3.061732926   |
| C130  | 12.485801552 | -4.957651846 | 4.086729520   |
| C131  | 4.184682589  | -4.327523344 | -3.579133439  |
| C132  | 4.769195654  | -4.600870731 | -2.220751374  |
| C133  | 6.193870859  | -3.946339020 | -2.013146974  |
| C134  | 7.168079115  | -4.451884743 | -3.117369129  |
| C135  | 8.618068047  | -4.007053457 | -2.865885648  |
| C136  | 9.626631230  | -4.675600644 | -3.755702686  |
| C137  | 6.740003532  | -4.485377363 | -0.655268931  |
| C138  | 3.917544878  | 0.539820549  | 1.872983376   |
| Fe139 | 5.599382806  | 0.967996460  | 0.887690121   |
| Fe140 | 1.776086215  | 0.536817132  | 1.760847308   |
| Fe141 | 3.691286097  | 0.363275139  | 3.823198112   |
| Fe142 | 4.072369835  | 2.460616285  | 2.339846215   |
| Fe143 | 2.029567072  | 2.561192050  | 4.028347848   |
| Fe144 | 4.943814734  | -1.119862594 | 2.202575446   |
| Fe145 | 3.626999159  | -0.600182811 | 0.112959987   |
| H146  | 0.145837308  | -3.297263256 | -8.965308486  |
| H147  | 0.304725451  | -1.680147140 | -8.814297707  |
| H148  | -3.805277290 | -1.544131510 | -10.031598026 |
| H149  | -1.460146892 | -1.263122061 | -10.371816715 |
| H150  | -1.574781340 | -2.993939204 | -10.669576711 |
| H151  | -4.448034224 | -1.357025237 | -7.286957530  |
| H152  | -4.653563224 | -4.252639758 | -9.370622127  |
| H153  | -5.615056290 | -1.521244812 | -8.622433000  |
| H154  | -5.287995872 | -6.423925469 | -8.819305596  |
| H155  | -2.822222525 | -5.126753811 | -7.673638050  |
| H156  | -6.313846044 | -5.769203666 | -7.517096131  |
| H157  | -2.071864903 | -3.333230713 | -2.879409576  |
| H158  | -2.604561422 | -3.631921410 | -5.688254378  |
| H159  | -1.075730393 | -5.921901177 | -6.354568615  |
| H160  | -6.677857214 | -4.056826402 | -2.074287192  |
| H161  | -5.173046986 | -4.136393525 | -4.574600216  |
| H162  | -2.105819107 | -7.231875459 | -5.727160831  |
| H163  | -3.059337907 | -2.251246761 | -3.889506940  |
| H164  | -5.404772989 | -6.807419082 | -4.085637809  |
| H165  | -7.209874220 | -4.733352245 | -3.634294805  |
| H166  | -0.376559334 | -5.401772778 | -1.385982174  |
| H167  | 0.092529985  | -3.704617694 | -1.131386073  |
| H168  | 0.637394749  | -4.946572800 | 0.010934258   |
| H169  | -2.279477707 | -4.075454159 | -0.450535438  |
| H170  | -5.683211068 | -9.058953743 | -3.700104170  |
| H171  | -4.813270358 | -2.501069089 | 1.047855845   |
| H172  | -6.283712706 | -6.731757282 | 0.764629382   |
| H173  | -8.159034317 | -4.674002785 | 2.812465828   |
| H174  | -0.980541083 | -2.324426016 | 0.696572052   |
| H175  | -0.393619242 | -3.464548646 | 1.902620152   |
| H176  | 1.406010563  | -4.632568988 | 9.111518941   |
| H177  | -6.398640987 | -1.736885225 | 1.300639750   |
| H178  | -8.287378859 | -2.962553494 | 2.344512553   |
| H179  | -5.352466980 | -2.090584730 | 2.696384400   |
| H180  | -7.332509867 | -3.426655515 | 3.775287254   |
| H181  | -6.683718113 | -4.176358331 | 0.862068183   |
| H182  | -4.962087511 | -4.520039377 | 3.376665402   |
| H183  | -4.349844969 | -4.814052101 | 0.529240455   |
| H184  | -2.125229788 | -3.046881093 | 1.842366301   |
| H185  | -1.811846123 | 2.019886455  | 3.943011268   |

|      |               |              |              |
|------|---------------|--------------|--------------|
| H186 | -3.492673043  | 1.417121899  | 4.011302654  |
| H187 | -2.824432970  | 1.056221403  | 6.060949446  |
| H188 | -3.807850761  | -1.336543264 | 6.595852326  |
| H189 | -0.608240027  | 0.190121854  | 6.717748504  |
| H190 | 1.480724997   | -1.120826841 | 6.884197368  |
| H191 | -0.816833049  | -4.773086698 | 7.037384401  |
| H192 | -3.021219148  | -6.487387639 | -0.749346580 |
| H193 | -1.249871258  | -8.755367386 | -2.150558676 |
| H194 | -2.235169806  | -9.750596345 | -1.053314342 |
| H195 | -3.209159094  | -7.549231842 | -2.792668287 |
| H196 | -6.560763459  | -8.708568028 | -2.193023501 |
| H197 | -2.912458718  | -3.459424537 | 6.834047017  |
| H198 | -1.074616114  | -6.128326845 | 1.469336652  |
| H199 | -8.111789863  | -8.120938211 | 2.377084454  |
| H200 | -7.142831435  | -8.841125534 | 1.065742761  |
| H201 | -5.230840109  | -8.977113597 | 3.026820270  |
| H202 | 7.966354388   | -9.777223279 | 5.572960365  |
| H203 | 4.488392999   | -0.149116423 | -5.538788437 |
| H204 | 4.905898238   | -6.023495788 | -4.151476141 |
| H205 | 7.024520227   | 3.040929297  | -7.467740699 |
| H206 | 7.712259504   | 3.708759275  | -5.966704029 |
| H207 | 4.757877475   | 3.438797396  | -6.750265053 |
| H208 | 3.182759808   | 8.646688614  | -4.332332531 |
| H209 | 6.090790441   | 5.486923751  | -7.470509302 |
| H210 | 0.416109457   | 1.207884620  | -4.298881984 |
| H211 | 0.845810663   | -1.373367712 | -5.897352761 |
| H212 | 4.148215876   | 6.217205849  | -4.508026098 |
| H213 | 2.190648626   | 7.340432190  | -6.418978778 |
| H214 | 6.291834796   | 6.055489094  | -4.580071787 |
| H215 | 3.635738823   | -1.372727071 | -4.603339103 |
| H216 | 5.228431972   | 3.780057154  | -5.082755211 |
| H217 | 7.513340423   | 5.886660795  | -5.671681027 |
| H218 | -0.641372803  | 1.301781444  | -7.816960410 |
| H219 | -0.586632451  | -0.212798780 | -3.955848269 |
| H220 | 7.850100066   | 2.455589563  | -4.258487165 |
| H221 | 1.415169171   | -1.295419646 | -4.234933182 |
| H222 | -5.492615774  | 0.065431607  | -0.461959020 |
| H223 | -2.720119050  | -0.063320504 | -1.033548267 |
| H224 | -7.472820285  | -0.844594183 | -4.767468628 |
| H225 | -4.956787644  | 0.695720512  | -5.241725357 |
| H226 | -7.565483123  | 2.202833388  | -2.341925808 |
| H227 | -12.079420811 | 4.083666471  | -0.383443494 |
| H228 | -10.135507266 | 0.785070536  | -1.128552918 |
| H229 | -10.055918943 | 2.872312880  | -2.993732537 |
| H230 | -8.959043274  | 3.467884210  | -0.177221479 |
| H231 | -11.665093376 | 7.680415006  | -2.579624521 |
| H232 | -5.045283255  | 2.344511879  | 0.415221223  |
| H233 | -5.293068682  | 3.054781763  | -1.180678489 |
| H234 | -12.993324255 | 6.430231022  | -0.791917073 |
| H235 | -8.755119994  | 4.036307752  | -2.719313886 |
| H236 | -5.074111743  | 1.128292129  | -3.048207495 |
| H237 | -5.852433653  | -1.537730480 | -4.657173204 |
| H238 | -6.821643802  | 3.202040852  | -6.771862906 |
| H239 | -0.540387629  | 3.572789147  | -1.263330492 |
| H240 | -6.122252322  | 2.068596682  | -7.944693627 |
| H241 | 2.557890821   | -2.893096639 | 10.271491232 |
| H242 | 1.726671260   | -2.112101761 | 9.100479745  |
| H243 | -1.426347661  | 4.385811594  | 4.663988976  |
| H244 | -3.688236950  | 3.526844601  | 3.043512307  |
| H245 | -3.449488188  | 4.738806041  | 6.372224978  |
| H246 | -3.038391620  | 4.205890180  | -0.965305829 |
| H247 | -3.539861725  | 5.901751550  | -2.100606667 |
| H248 | -4.545509486  | 5.919543902  | -0.872386284 |
| H249 | -1.687939318  | 4.969622218  | -4.174109786 |
| H250 | -2.570583926  | 5.431092939  | -5.657729483 |
| H251 | -5.387868187  | 9.201512814  | 6.518396814  |
| H252 | -6.965049299  | 9.963610274  | 6.178111183  |
| H253 | -4.078087825  | 8.555131837  | 4.707593252  |
| H254 | -4.739833157  | 8.444011248  | 3.086837659  |
| H255 | -3.004205272  | 10.894139608 | 1.321869556  |
| H256 | -0.324733200  | 7.794622025  | -0.485844306 |
| H257 | -8.592920129  | 7.303971890  | -0.543699712 |
| H258 | -7.369526784  | 4.483464303  | 3.371251061  |

|      |               |               |              |
|------|---------------|---------------|--------------|
| H259 | -4.779554635  | 7.992790245   | 0.405983919  |
| H260 | 0.354765257   | 5.660682917   | 3.084915865  |
| H261 | -0.239728547  | 6.249320698   | 5.368599676  |
| H262 | -1.076892653  | 5.672952924   | 1.016828790  |
| H263 | -4.004791547  | 2.266700868   | -6.871304650 |
| H264 | -0.441343821  | 8.587607205   | 7.565289511  |
| H265 | -1.455758276  | 3.012169827   | -6.056267269 |
| H266 | 0.563735288   | 7.411789018   | 2.961906527  |
| H267 | -5.649362852  | 5.085861881   | 1.714913486  |
| H268 | -4.473482997  | 5.466897085   | -4.093562559 |
| H269 | -1.900715128  | 7.690471026   | 8.033959805  |
| H270 | -1.457080087  | 10.342181398  | 0.781876053  |
| H271 | -4.868417040  | 9.706290865   | 0.567085131  |
| H272 | 0.698309240   | 1.434767773   | -6.825961322 |
| H273 | -1.332365895  | -0.292652299  | -6.320919307 |
| H274 | -10.296886449 | 6.798652631   | 1.184863188  |
| H275 | -3.319490827  | 3.132287846   | -3.765009775 |
| H276 | -1.865691793  | 7.765386299   | 3.388273132  |
| H277 | -0.406283508  | 8.641491512   | 1.060975219  |
| H278 | 0.597181828   | 6.171640139   | 0.829129251  |
| H279 | -2.726016997  | 7.098171749   | -0.104515902 |
| H280 | -6.023057795  | 3.578870856   | 7.006800072  |
| H281 | -5.546715367  | 6.594293372   | 5.714144479  |
| H282 | -7.205907242  | 8.024621518   | 7.650219187  |
| H283 | -4.855770652  | 4.331115510   | 8.114027417  |
| H284 | -8.003830391  | 6.091010384   | 4.953121552  |
| H285 | 9.712171164   | 4.408604394   | -0.441090929 |
| H286 | 10.026356953  | 2.781287194   | -1.072623019 |
| H287 | 10.221199890  | -1.109038772  | 1.898554983  |
| H288 | 11.859778515  | 4.204512269   | -1.636248200 |
| H289 | 11.037344382  | 3.959452721   | -3.031525635 |
| H290 | 1.145275165   | 2.438417177   | 7.219566195  |
| H291 | -1.067890690  | 3.109328341   | 9.287386011  |
| H292 | 0.818129212   | 6.640517133   | 7.742511970  |
| H293 | -0.589374929  | 2.696770306   | 6.850722399  |
| H294 | -0.062833665  | 4.023466684   | 10.198365589 |
| H295 | 4.921278719   | 5.925839543   | 4.091588718  |
| H296 | 1.277671926   | 4.606046502   | 8.356212896  |
| H297 | 3.757133414   | -8.908009135  | 1.463848921  |
| H298 | 6.750989430   | -8.267640535  | 1.614464370  |
| H299 | 5.389833582   | 5.497412489   | 1.787255351  |
| H300 | 0.937525444   | -3.042657877  | 4.413653531  |
| H301 | 4.477144475   | 7.482068363   | -0.923846246 |
| H302 | 3.132768582   | 2.095378330   | -3.177685944 |
| H303 | 3.080812162   | 6.512349941   | -0.468687739 |
| H304 | 2.249089087   | -6.746430275  | 1.973089177  |
| H305 | 4.989412243   | 4.658559867   | -0.007052585 |
| H306 | 3.386678974   | -5.782167139  | 1.024347362  |
| H307 | 4.661569969   | -7.766239740  | 0.446916173  |
| H308 | 5.243075206   | -6.444769977  | 2.574061680  |
| H309 | 4.127440517   | -7.490900232  | 3.470942026  |
| H310 | 1.184288284   | 5.234089399   | -6.141657611 |
| H311 | 5.366208073   | -10.719569058 | 0.585252508  |
| H312 | 6.927495981   | -10.930820173 | -2.045321170 |
| H313 | 2.613563129   | 2.955528097   | -0.882326790 |
| H314 | 6.256706365   | -12.993156198 | -0.089887984 |
| H315 | 5.646680725   | -12.737887386 | -1.588493944 |
| H316 | 3.743146727   | -4.322454393  | 2.893166725  |
| H317 | 1.284867276   | 4.995581552   | -0.607822657 |
| H318 | 2.413047027   | 3.396449817   | -5.171775298 |
| H319 | 10.647506267  | -6.623437832  | -0.189223214 |
| H320 | 10.579477205  | -3.178437176  | -0.332240925 |
| H321 | 8.276562286   | -6.369222272  | 0.316653377  |
| H322 | 11.243301075  | -6.051851965  | -1.493896931 |
| H323 | 7.036102905   | 7.795952543   | 2.939684400  |
| H324 | 6.795410657   | -4.153250980  | 1.973100028  |
| H325 | 4.841386199   | -5.682323319  | -2.031132928 |
| H326 | 7.476556894   | 4.026551478   | -0.510704503 |
| H327 | 7.124540573   | -5.552194084  | -3.145195868 |
| H328 | 9.916648877   | 0.630419556   | -3.281616896 |
| H329 | 7.485712215   | 0.333554906   | -2.578650214 |
| H330 | 8.064825416   | -11.838977644 | -1.041840015 |
| H331 | 2.475631810   | -2.659594787  | 3.701994262  |

|       |               |               |              |
|-------|---------------|---------------|--------------|
| H332  | 7.704598512   | -5.897104643  | 3.350859856  |
| H333  | 6.421508152   | -3.622518698  | 3.383988923  |
| H334  | 7.287647556   | -8.209138824  | 3.752021378  |
| H335  | 0.950967717   | -6.457129534  | 3.587914558  |
| H336  | 10.098656343  | -4.935164578  | -5.569064411 |
| H337  | 8.683246021   | -2.918859859  | -3.012062254 |
| H338  | 8.920484065   | -4.227272030  | -1.836219831 |
| H339  | 6.830001565   | -4.064186404  | -4.089311730 |
| H340  | 5.575274507   | 3.126913145   | -1.714186062 |
| H341  | 0.568017364   | 6.333812975   | -2.607750665 |
| H342  | 0.256768224   | 6.382498457   | -5.145554923 |
| H343  | 4.111269500   | -4.144464416  | -1.469358790 |
| H344  | 8.602325588   | -6.799996911  | 2.462305915  |
| H345  | 8.744455389   | -7.842803108  | 0.462593515  |
| H346  | -0.110320673  | -5.137086465  | 3.900852652  |
| H347  | 11.512252252  | -0.756694731  | -1.827319742 |
| H348  | 9.067754030   | -2.902711373  | 0.543768243  |
| H349  | 6.247330772   | 3.842835228   | -3.212690871 |
| H350  | 4.319719028   | 7.544111337   | 3.647788740  |
| H351  | 1.653468485   | -4.829306964  | 6.681693858  |
| H352  | 2.593079109   | -3.316720786  | 6.609898769  |
| H353  | 12.559649190  | -0.979569072  | 1.829993092  |
| H354  | 12.694469782  | -2.127858990  | 0.672269728  |
| H355  | 11.783010189  | -6.216214322  | 2.533806086  |
| H356  | 11.241765163  | -4.539263096  | 1.088862223  |
| H357  | 13.254623163  | -4.224233106  | 3.738569011  |
| H358  | 10.490913203  | -5.579185681  | 3.572008080  |
| H359  | 4.400353839   | -4.321442699  | 8.456767193  |
| H360  | -10.844534249 | 5.887097056   | 6.493946693  |
| H361  | 6.400542380   | -10.601788305 | 5.347732546  |
| H362  | 5.420575310   | -8.133276929  | 6.090509103  |
| H363  | -10.290191641 | 7.493795649   | 3.973034917  |
| H364  | -9.760015668  | 4.459587277   | 4.052872456  |
| H365  | -10.989964957 | 5.276663494   | 3.072904929  |
| H366  | 3.166983657   | -1.520702471  | -0.988502327 |
| H367  | -6.436127391  | 7.023332743   | -1.185823124 |
| H368  | 1.810886427   | -0.992650930  | 1.757356083  |
| H369  | 0.993387630   | -0.741583944  | -0.693868312 |
| H370  | -0.391352251  | 1.059860647   | -1.222389900 |
| Mo371 | 6.138867437   | -1.540807973  | -0.176788033 |
| N372  | 0.043841440   | -2.415976388  | -9.475188861 |
| N373  | -3.658603601  | -2.005589770  | -9.137244581 |
| N374  | -4.995289057  | -4.400670313  | -8.423546476 |
| N375  | -3.054399385  | -5.852011808  | -6.997236754 |
| N376  | -2.624231524  | -4.085122153  | -4.772876715 |
| N377  | -5.196549267  | -4.216465407  | -3.555278193 |
| N378  | -5.673244571  | -7.059778886  | -3.130916334 |
| N379  | -3.295293141  | -8.297437241  | -2.097900610 |
| N380  | -2.300660401  | -6.711552715  | -0.066599756 |
| N381  | -4.237747579  | -5.076000641  | 1.509741100  |
| N382  | -6.394180892  | -7.027287115  | 1.737461114  |
| N383  | 5.956088403   | -12.263170537 | -0.739187547 |
| N384  | 6.079399595   | -9.989513899  | 0.687351593  |
| N385  | 3.001752284   | -5.028108247  | 2.931640406  |
| N386  | 0.785666904   | -5.457115004  | 3.543929966  |
| N387  | 1.681006683   | -3.319869075  | 3.776535164  |
| N388  | 6.740598636   | -9.061384875  | 4.004511085  |
| N389  | -0.332697958  | 1.535623710   | -6.871348285 |
| N390  | 3.605320637   | -0.553559540  | -5.213641793 |
| N391  | -2.231491959  | 2.673039274   | -5.462759149 |
| N392  | -4.815939900  | 2.704764388   | -6.441628583 |
| N393  | -5.956252234  | 0.471164053   | -5.280586555 |
| N394  | -5.786389192  | 0.694147405   | -2.462752311 |
| N395  | -2.669007661  | 3.215763009   | -1.009459158 |
| N396  | -1.300153517  | 1.556354470   | -1.206772285 |
| N397  | -7.923145168  | 2.091785481   | -1.395840972 |
| N398  | -10.478898383 | 5.883548470   | -2.684357653 |
| N399  | -12.199450979 | 6.039039484   | -1.291494727 |
| N400  | 2.499494415   | -2.764352152  | 9.258601837  |
| N401  | -0.090758796  | 3.404322495   | 9.383055977  |
| N402  | -0.190925322  | 6.525609426   | 7.696016440  |
| N403  | -0.934740418  | 6.937243529   | 5.040201139  |
| N404  | -2.238176634  | 7.892886047   | 0.343854233  |



|      |               |               |              |
|------|---------------|---------------|--------------|
| N405 | -2.410969323  | 10.119344420  | 1.043145891  |
| N406 | -4.324070619  | 8.858055882   | 0.702509191  |
| N407 | -2.331100129  | 4.598309124   | 4.199300164  |
| N408 | -4.413095854  | 4.541422868   | 6.083190670  |
| N409 | -6.291109459  | 6.635771165   | 6.410971342  |
| N410 | -4.891433346  | 8.602794006   | 4.081510239  |
| N411 | -8.775632025  | 6.704743592   | 5.201777057  |
| N412 | 10.986422281  | 4.424754369   | -2.120312206 |
| N413 | 7.456999105   | 4.031527865   | -1.535994885 |
| N414 | 4.902600612   | 5.469545292   | -0.655639458 |
| N415 | 5.014340448   | 6.417792754   | 2.045734958  |
| N416 | 6.542497565   | 6.189999561   | -5.567655335 |
| N417 | 3.675275980   | 6.373117114   | -5.404516259 |
| N418 | 12.093014954  | -1.366473873  | 1.004253358  |
| N419 | 8.288881207   | -0.979624240  | -1.073607809 |
| N420 | 9.619781201   | 0.052958904   | -2.499790314 |
| N421 | 11.250778996  | -4.267795028  | 2.071357587  |
| N422 | -1.155207235  | 0.464564912   | 1.751874268  |
| N423 | -0.021996063  | 0.496255803   | 1.766256654  |
| O424 | -2.143557412  | -2.875453541  | -7.675013755 |
| O425 | -5.550861829  | -3.444121353  | -6.431013494 |
| O426 | -4.735799654  | -7.030842342  | -5.995194835 |
| O427 | -2.230001298  | -5.965730266  | -3.554783268 |
| O428 | -4.180980983  | -3.755910052  | -1.568362892 |
| O429 | -6.654722522  | -6.401052912  | -1.174118239 |
| O430 | -4.607883421  | -9.960353662  | -1.216454680 |
| O431 | -0.661490663  | -8.242730566  | 0.444789745  |
| O432 | -2.798540385  | -5.706853046  | 3.169346913  |
| O433 | -6.276075650  | -6.539204653  | 3.950209531  |
| O434 | -6.870116909  | -10.004739780 | 3.679175142  |
| O435 | 8.187657705   | -9.447166803  | -0.096652145 |
| O436 | 5.229137529   | -10.647344161 | 3.305972462  |
| O437 | 6.624431878   | -8.814599322  | 7.588716534  |
| O438 | -3.045353185  | 0.711407322   | -4.594583916 |
| O439 | 2.413764802   | 1.008756797   | -6.358962327 |
| O440 | -5.504985022  | 4.156627719   | -4.810192594 |
| O441 | -3.558575531  | 5.763624929   | -3.845563029 |
| O442 | -7.986380056  | 0.926714764   | -6.261302638 |
| O443 | -7.124869648  | -1.137747114  | -2.220820007 |
| O444 | -7.565744629  | 1.104656403   | 0.635469047  |
| O445 | -11.048092855 | 1.960878937   | 0.264614236  |
| O446 | 3.455462390   | -6.116624846  | 8.690621473  |
| O447 | -3.018706483  | -0.767874547  | 6.662442847  |
| O448 | -1.944099283  | 5.072912740   | 7.793267745  |
| O449 | -2.463789015  | 8.534132164   | 5.668362083  |
| O450 | -3.407457693  | 5.934863773   | 2.682116769  |
| O451 | -5.678332994  | 3.301664094   | 4.628050094  |
| O452 | -2.684307268  | 2.002021504   | 5.849927630  |
| O453 | -7.122078676  | 5.657368488   | 8.304996534  |
| O454 | -9.372129944  | 8.596034456   | 6.328443015  |
| O455 | -7.076091863  | 9.133554043   | 3.682615863  |
| O456 | -12.346576646 | 6.531071011   | 5.270932989  |
| O457 | -6.020026810  | 6.563420929   | -0.431398093 |
| O458 | 8.671214005   | 3.651094413   | -3.451118988 |
| O459 | 5.196441807   | 6.118253802   | -2.832747389 |
| O460 | 3.679661721   | 8.187690758   | 1.474249198  |
| O461 | 6.834876071   | 7.534886095   | 4.952868263  |
| O462 | 3.720044775   | 6.143364415   | -7.673381418 |
| O463 | 6.202449238   | 0.820780832   | -6.281406165 |
| O464 | 7.427502402   | 1.601835574   | -4.589300040 |
| O465 | 1.181934000   | 8.496947349   | -3.976356888 |
| O466 | 10.912629777  | -2.726167945  | 3.695247978  |
| O467 | 12.555573461  | -5.478321316  | 5.191066433  |
| O468 | 3.554198777   | -3.329883753  | -3.898129003 |
| O469 | 4.401203395   | -5.283196060  | -4.539855014 |
| O470 | 10.583141161  | -5.344548377  | -3.371264207 |
| O471 | 9.393603702   | -4.462525941  | -5.077171688 |
| O472 | 7.025634763   | -3.583728292  | 0.227696178  |
| O473 | 6.926460396   | -5.714390922  | -0.499792521 |
| O474 | 6.094413438   | -2.570683062  | -2.008665936 |
| O475 | 8.242397454   | -6.726244018  | 3.385615948  |
| O476 | 6.627606889   | -4.448818752  | 2.903489513  |
| O477 | -3.588551688  | 5.822297303   | -1.106354565 |

|                       |                                   |               |               |              |
|-----------------------|-----------------------------------|---------------|---------------|--------------|
|                       | O478                              | 11.511719102  | -6.393436777  | -0.615964437 |
|                       | O479                              | 9.014996914   | -6.919988808  | 0.707081395  |
|                       | S480                              | 0.814354401   | 4.029992783   | 5.399106505  |
|                       | S481                              | 1.954107408   | 3.041633657   | 1.835064236  |
|                       | S482                              | 5.136352520   | 0.336991544   | -1.218910755 |
|                       | S483                              | 1.471077855   | 0.311257825   | 4.155271033  |
|                       | S484                              | 1.740796314   | 0.397833009   | -0.538968913 |
|                       | S485                              | 5.947423749   | 3.132532810   | 1.314595880  |
|                       | S486                              | 4.211333027   | -2.628914022  | 0.751880328  |
|                       | S487                              | 4.255333794   | 2.465901358   | 4.562514793  |
|                       | S488                              | 7.051489324   | -0.516374533  | 1.782526245  |
|                       | S489                              | 4.566885379   | -1.638822434  | 4.288730537  |
| D 47(2)               | bm2cnx2b6x2hn2n2xd2ti 1 53120.671 |               |               |              |
| TS                    | C1                                | -2.396513505  | -2.387605422  | -8.795899674 |
| Fe( 139) 0.547 2.398  | C2                                | -1.333455792  | -2.242093487  | -9.889628599 |
| Fe( 140) 0.352 0.480  | C3                                | -4.735662645  | -1.979942170  | -8.167967242 |
| Fe( 141) 0.563 2.725  | C4                                | -5.119974180  | -3.345672411  | -7.602810222 |
| Fe( 142) 0.547 -2.615 | C5                                | -5.290160759  | -5.752551982  | -7.961242939 |
| Fe( 143) 0.609 3.185  | C6                                | -4.328735415  | -6.262736995  | -6.882798308 |
| Fe( 144) 0.511 -2.212 | C7                                | -2.064073504  | -6.155758366  | -5.954793615 |
| Fe( 145) 0.316 -0.470 | C8                                | -2.302828099  | -5.388890795  | -4.650093284 |
|                       | C9                                | -2.903142885  | -3.278589025  | -3.588637597 |
|                       | C10                               | -4.139595309  | -3.758061623  | -2.811312524 |
|                       | C11                               | -6.378029917  | -4.706614322  | -2.895987246 |
|                       | C12                               | -6.217910787  | -6.113673616  | -2.302681063 |
|                       | C13                               | -5.653118545  | -8.455775176  | -2.753216606 |
|                       | C14                               | -4.460435915  | -8.955713085  | -1.930051444 |
|                       | C15                               | -2.068101506  | -8.725263874  | -1.425099109 |
|                       | C16                               | -1.612438040  | -7.869038040  | -0.240558682 |
|                       | C17                               | -1.921178037  | -5.701577382  | 0.922505305  |
|                       | C18                               | -3.016893094  | -5.493547258  | 1.981130897  |
|                       | C19                               | -1.471482192  | -4.385050104  | 0.226939932  |
|                       | C20                               | -1.258229170  | -3.236611830  | 1.218511883  |
|                       | C21                               | -0.206904237  | -4.625517280  | -0.606039376 |
|                       | C22                               | -5.364301926  | -4.882218956  | 2.441748128  |
|                       | C23                               | -6.046726893  | -6.219864642  | 2.795492643  |
|                       | C24                               | -6.355639000  | -3.836138361  | 1.881918074  |
|                       | C25                               | -7.599500168  | -3.719564320  | 2.772301767  |
|                       | C26                               | -5.677557371  | -2.468801296  | 1.726486430  |
|                       | C27                               | -7.080261331  | -8.279097360  | 2.034147100  |
|                       | C28                               | -6.325028671  | -9.141576387  | 3.026684257  |
|                       | C29                               | 7.070271837   | -11.366518835 | -1.045794285 |
|                       | C30                               | 7.163721004   | -10.178625398 | -0.087580041 |
|                       | C31                               | 5.899161889   | -8.972092597  | 1.698799958  |
|                       | C32                               | 5.915083141   | -9.648400561  | 3.083695767  |
|                       | C33                               | 4.588470291   | -8.204113948  | 1.448717455  |
|                       | C34                               | 4.336629260   | -7.082033349  | 2.459303080  |
|                       | C35                               | 3.185972261   | -6.184447091  | 2.008078871  |
|                       | C36                               | 1.816294506   | -4.615491876  | 3.399188707  |
|                       | C37                               | 6.903916603   | -9.630764075  | 5.323391525  |
|                       | C38                               | 6.280115436   | -8.783176606  | 6.412257803  |
|                       | C39                               | -0.966959801  | 0.640180930   | -5.871200074 |
|                       | C40                               | -2.192923262  | 1.324754770   | -5.241827370 |
|                       | C41                               | 0.008005180   | 0.283486424   | -4.723051444 |
|                       | C42                               | 1.168351487   | -0.665338288  | -5.088936869 |
|                       | C43                               | 2.440101530   | 0.016331490   | -5.591446700 |
|                       | C44                               | -3.195476656  | 3.521009776   | -4.782981067 |
|                       | C45                               | -4.613653942  | 3.492704664   | -5.370968078 |
|                       | C46                               | -2.687118675  | 4.969499453   | -4.653758844 |
|                       | C47                               | -6.155568711  | 2.335573093   | -6.887043073 |
|                       | C48                               | -6.797630700  | 1.175980225   | -6.109461802 |
|                       | C49                               | -6.457929626  | -0.632324591  | -4.471837856 |
|                       | C50                               | -6.488837300  | -0.393378925  | -2.961891588 |
|                       | C51                               | -5.791544234  | 0.944359072   | -1.031047924 |
|                       | C52                               | -7.202290770  | 1.333841692   | -0.524050520 |
|                       | C53                               | -4.902438125  | 2.144240333   | -0.667019890 |
|                       | C54                               | -3.437129936  | 2.041465930   | -0.940720290 |
|                       | C55                               | -2.559290498  | 0.994771488   | -1.079546915 |
|                       | C56                               | -1.379713115  | 2.875849150   | -1.167816682 |
|                       | C57                               | -9.140035948  | 2.783778251   | -1.023172299 |
|                       | C58                               | -10.192516694 | 1.758744359   | -0.603388485 |
|                       | C59                               | -9.616839343  | 3.589185372   | -2.254453816 |

|      |               |              |              |
|------|---------------|--------------|--------------|
| C60  | -10.578907007 | 4.709714709  | -1.987253168 |
| C61  | -11.644187449 | 4.797296719  | -1.112962657 |
| C62  | -11.435709696 | 6.677249630  | -2.267688695 |
| C63  | 2.185538916   | -4.032923471 | 8.618316151  |
| C64  | 3.445075122   | -4.878435058 | 8.594318673  |
| C65  | 1.753900204   | -3.835672157 | 7.139678895  |
| C66  | 0.475159506   | -3.044049500 | 7.000796092  |
| C67  | -0.779928049  | -3.681026790 | 6.971277296  |
| C68  | 0.504983939   | -1.641152792 | 6.904683597  |
| C69  | -1.964876286  | -2.946120938 | 6.853834672  |
| C70  | -0.668860559  | -0.893377160 | 6.801239057  |
| C71  | -1.903037418  | -1.549305112 | 6.772331464  |
| C72  | 0.281655991   | 4.163163415  | 8.183477232  |
| C73  | -0.715908400  | 5.286080181  | 7.867055486  |
| C74  | 0.383215246   | 3.188646619  | 7.001099582  |
| C75  | -1.006546746  | 7.679486287  | 7.383873770  |
| C76  | -1.532454753  | 7.742744662  | 5.948227412  |
| C77  | -1.364552488  | 6.825526234  | 3.659668598  |
| C78  | -2.445434221  | 5.739385680  | 3.470510100  |
| C79  | -0.127498606  | 6.606866200  | 2.769368757  |
| C80  | -0.350524329  | 6.505773823  | 1.257011942  |
| C81  | -0.780775953  | 7.789149794  | 0.524205630  |
| C82  | -2.975130507  | 8.959941114  | 0.654766454  |
| C83  | -3.315862809  | 3.550357241  | 4.099435112  |
| C84  | -4.574760752  | 3.805321447  | 4.948835458  |
| C85  | -2.762295572  | 2.164962896  | 4.478584365  |
| C86  | -5.375699328  | 4.461322788  | 7.161102377  |
| C87  | -6.340571325  | 5.629600345  | 7.338854499  |
| C88  | -7.075786395  | 7.845618069  | 6.567674854  |
| C89  | -8.510652773  | 7.750515459  | 6.006960577  |
| C90  | -6.332690388  | 9.071246775  | 5.995289993  |
| C91  | -6.128128333  | 8.967491798  | 4.488470795  |
| C92  | -10.044013171 | 6.560115321  | 4.506551227  |
| C93  | -11.166165868 | 6.322346424  | 5.510961601  |
| C94  | -9.980282539  | 5.377625951  | 3.505848567  |
| C95  | -8.956466510  | 5.614406546  | 2.420030477  |
| C96  | -9.273972001  | 6.409031135  | 1.308568380  |
| C97  | -7.653580278  | 5.101460200  | 2.520033619  |
| C98  | -8.317938143  | 6.704848669  | 0.334295645  |
| C99  | -6.675279513  | 5.407159023  | 1.567232318  |
| C100 | -7.021152468  | 6.212232906  | 0.485002944  |
| C101 | 9.868003081   | 3.853941881  | -1.369569832 |
| C102 | 8.603738195   | 3.857581249  | -2.211168463 |
| C103 | 6.125740513   | 3.987398773  | -2.139817622 |
| C104 | 5.346602264   | 5.288331509  | -1.906727274 |
| C105 | 4.127715587   | 6.630826363  | -0.261638152 |
| C106 | 4.259587065   | 7.127137703  | 1.174941350  |
| C107 | 5.098334978   | 6.791621836  | 3.452046816  |
| C108 | 6.428473242   | 7.422639013  | 3.805463058  |
| C109 | 5.681746525   | 5.404463452  | -6.448150730 |
| C110 | 4.284008629   | 6.017382312  | -6.571510863 |
| C111 | 5.546377163   | 3.897836075  | -6.129602157 |
| C112 | 6.865118997   | 3.145175431  | -6.382322020 |
| C113 | 6.805760193   | 1.763041615  | -5.770259792 |
| C114 | 2.313165634   | 6.882972679  | -5.416617859 |
| C115 | 2.201865604   | 8.083084249  | -4.497389326 |
| C116 | 1.205624318   | 5.817182719  | -5.242483317 |
| C117 | 1.450387519   | 4.961734488  | -4.028128852 |
| C118 | 1.078468383   | 5.403195379  | -2.747497417 |
| C119 | 2.173937454   | 3.761260771  | -4.145572537 |
| C120 | 1.478120668   | 4.686907307  | -1.615197951 |
| C121 | 2.567349027   | 3.044965046  | -3.012286054 |
| C122 | 2.243881593   | 3.523474732  | -1.739024954 |
| C123 | 10.800998624  | -1.926117323 | 1.410982415  |
| C124 | 10.976044881  | -3.010530899 | 2.485387716  |
| C125 | 10.008857948  | -2.419653472 | 0.189038145  |
| C126 | 9.637194841   | -1.372055599 | -0.814712746 |
| C127 | 10.477598841  | -0.733577160 | -1.704295564 |
| C128 | 8.384806176   | -0.126728281 | -2.101661839 |
| C129 | 11.436068824  | -5.323975253 | 3.069494133  |
| C130 | 12.499888823  | -4.958199375 | 4.080214911  |
| C131 | 4.206502484   | -4.317427057 | -3.589298553 |
| C132 | 4.787913360   | -4.589531923 | -2.229789314 |

|       |              |              |               |
|-------|--------------|--------------|---------------|
| C133  | 6.218849995  | -3.948250466 | -2.022338527  |
| C134  | 7.191940471  | -4.468258763 | -3.120824066  |
| C135  | 8.641114231  | -4.020974644 | -2.870596975  |
| C136  | 9.646945875  | -4.683444515 | -3.766877786  |
| C137  | 6.750677182  | -4.486606123 | -0.658736953  |
| C138  | 3.925119221  | 0.533700881  | 1.872302117   |
| Fe139 | 5.598498445  | 0.959465423  | 0.872205253   |
| Fe140 | 2.011833650  | 0.653364778  | 1.742373509   |
| Fe141 | 3.676859830  | 0.325170818  | 3.842961629   |
| Fe142 | 4.081416294  | 2.452406191  | 2.350156795   |
| Fe143 | 2.033894522  | 2.545848930  | 4.026407925   |
| Fe144 | 4.945451921  | -1.156249224 | 2.185701837   |
| Fe145 | 3.633168530  | -0.578139964 | 0.035868479   |
| H146  | 0.148419674  | -3.288018223 | -8.954910881  |
| H147  | 0.307478862  | -1.669675796 | -8.810140394  |
| H148  | -3.804378623 | -1.553590096 | -10.044409826 |
| H149  | -1.454192375 | -1.258800020 | -10.371582810 |
| H150  | -1.567580563 | -2.991547645 | -10.665098806 |
| H151  | -4.463355095 | -1.356525599 | -7.304107246  |
| H152  | -4.643680944 | -4.262082686 | -9.377901866  |
| H153  | -5.622404551 | -1.540123430 | -8.643655317  |
| H154  | -5.260435833 | -6.436718235 | -8.819536427  |
| H155  | -2.807813604 | -5.128355970 | -7.668223787  |
| H156  | -6.297394122 | -5.783653824 | -7.525926450  |
| H157  | -2.060711311 | -3.310097225 | -2.884445081  |
| H158  | -2.591698241 | -3.623379062 | -5.691607259  |
| H159  | -1.062362687 | -5.921387136 | -6.339539278  |
| H160  | -6.663424364 | -4.038727576 | -2.073951328  |
| H161  | -5.157677856 | -4.132813604 | -4.574934503  |
| H162  | -2.096828374 | -7.223991751 | -5.709557258  |
| H163  | -3.049062722 | -2.233235839 | -3.901135068  |
| H164  | -5.400125306 | -6.800812330 | -4.076152159  |
| H165  | -7.194651240 | -4.726872843 | -3.630166972  |
| H166  | -0.351167572 | -5.429358728 | -1.341648071  |
| H167  | 0.069102659  | -3.712656464 | -1.155449444  |
| H168  | 0.646157803  | -4.890515303 | 0.038742158   |
| H169  | -2.284481772 | -4.090945899 | -0.456360505  |
| H170  | -5.684942161 | -9.050969034 | -3.677345452  |
| H171  | -4.809083807 | -2.509578113 | 1.053209647   |
| H172  | -6.280599529 | -6.733951229 | 0.788588346   |
| H173  | -8.149178104 | -4.668983319 | 2.844447635   |
| H174  | -1.013802254 | -2.316693044 | 0.668344104   |
| H175  | -0.413474825 | -3.430261922 | 1.893258751   |
| H176  | 1.398357425  | -4.626176291 | 9.122053807   |
| H177  | -6.390994554 | -1.739158047 | 1.314999607   |
| H178  | -8.280993955 | -2.961300468 | 2.359450941   |
| H179  | -5.335845242 | -2.093866287 | 2.705181366   |
| H180  | -7.322669826 | -3.413760622 | 3.793816665   |
| H181  | -6.680260534 | -4.183998717 | 0.884079166   |
| H182  | -4.952754223 | -4.521099443 | 3.395475728   |
| H183  | -4.357409320 | -4.838625196 | 0.544501860   |
| H184  | -2.150576469 | -3.033940926 | 1.828909007   |
| H185  | -1.755429723 | 2.054563498  | 4.041099297   |
| H186  | -3.427044667 | 1.411588076  | 4.027795052   |
| H187  | -2.857136825 | 1.063215414  | 6.100995994   |
| H188  | -3.825125620 | -1.333948933 | 6.589070080   |
| H189  | -0.622868432 | 0.191650502  | 6.701920485   |
| H190  | 1.465777789  | -1.121544447 | 6.874326509   |
| H191  | -0.837357528 | -4.771366469 | 7.034202173   |
| H192  | -3.017512508 | -6.487469672 | -0.742543854  |
| H193  | -1.236204727 | -8.744779750 | -2.143914681  |
| H194  | -2.220354471 | -9.745947100 | -1.052004476  |
| H195  | -3.195590337 | -7.543699737 | -2.788473360  |
| H196  | -6.550902482 | -8.688231360 | -2.165867334  |
| H197  | -2.930707203 | -3.458145710 | 6.816844557   |
| H198  | -1.073177652 | -6.126081203 | 1.474567465   |
| H199  | -8.106314750 | -8.124430863 | 2.404945254   |
| H200  | -7.137263960 | -8.844241034 | 1.090466342   |
| H201  | -5.222563066 | -8.977519879 | 3.050503518   |
| H202  | 7.965819927  | -9.798815032 | 5.559692307   |
| H203  | 4.483961803  | -0.135948637 | -5.524403130  |
| H204  | 4.935760222  | -6.009516624 | -4.158068608  |
| H205  | 7.021370416  | 3.040212046  | -7.465519545  |

|      |               |              |              |
|------|---------------|--------------|--------------|
| H206 | 7.711556502   | 3.710648737  | -5.966638987 |
| H207 | 4.756881010   | 3.443817308  | -6.748581255 |
| H208 | 3.161150108   | 8.631766377  | -4.342650416 |
| H209 | 6.099425862   | 5.493215554  | -7.462258096 |
| H210 | 0.405713252   | 1.218897931  | -4.296133082 |
| H211 | 0.845157634   | -1.371641641 | -5.873201678 |
| H212 | 4.132480054   | 6.197281710  | -4.504835175 |
| H213 | 2.183768457   | 7.315506963  | -6.430527388 |
| H214 | 6.280087679   | 6.059908227  | -4.570061621 |
| H215 | 3.633696416   | -1.353581679 | -4.580175290 |
| H216 | 5.227799951   | 3.784408719  | -5.081977752 |
| H217 | 7.509217665   | 5.888295740  | -5.651610062 |
| H218 | -0.652889517  | 1.273616156  | -7.810679719 |
| H219 | -0.587147773  | -0.202811183 | -3.936603934 |
| H220 | 7.848344596   | 2.458548703  | -4.254382033 |
| H221 | 1.412782262   | -1.282335172 | -4.212856944 |
| H222 | -5.495289940  | 0.046350394  | -0.470156924 |
| H223 | -2.724342337  | -0.076442221 | -1.084030423 |
| H224 | -7.491429753  | -0.841346374 | -4.775653716 |
| H225 | -4.971364998  | 0.687990682  | -5.247842533 |
| H226 | -7.546697745  | 2.212405219  | -2.339679691 |
| H227 | -12.049597799 | 4.107083504  | -0.382003475 |
| H228 | -10.135540275 | 0.796469223  | -1.166858093 |
| H229 | -10.026322254 | 2.892340947  | -3.007911077 |
| H230 | -8.955243319  | 3.460809326  | -0.173950534 |
| H231 | -11.647672545 | 7.686803230  | -2.610918176 |
| H232 | -5.039999839  | 2.320713429  | 0.412321874  |
| H233 | -5.292093014  | 3.040158452  | -1.176682438 |
| H234 | -12.969634683 | 6.448853593  | -0.808146787 |
| H235 | -8.726665866  | 4.048137405  | -2.712701411 |
| H236 | -5.057469483  | 1.098218643  | -3.049045211 |
| H237 | -5.873721970  | -1.545083776 | -4.664853626 |
| H238 | -6.825510700  | 3.198901686  | -6.785519441 |
| H239 | -0.537325942  | 3.558074821  | -1.250875050 |
| H240 | -6.121305284  | 2.060458113  | -7.949673899 |
| H241 | 2.544262925   | -2.869766793 | 10.267464049 |
| H242 | 1.701965535   | -2.101513190 | 9.098103818  |
| H243 | -1.406851243  | 4.394545139  | 4.673652152  |
| H244 | -3.653051780  | 3.510682179  | 3.053201806  |
| H245 | -3.439194488  | 4.748025525  | 6.371262503  |
| H246 | -3.035686946  | 4.190132305  | -0.952574961 |
| H247 | -3.534765834  | 5.897653386  | -2.094558260 |
| H248 | -4.536514782  | 5.919816777  | -0.864837680 |
| H249 | -1.699612073  | 4.961975261  | -4.172388867 |
| H250 | -2.586548788  | 5.425498355  | -5.652911429 |
| H251 | -5.380009134  | 9.182963296  | 6.533229253  |
| H252 | -6.953556218  | 9.954726360  | 6.193164681  |
| H253 | -4.066389947  | 8.560083536  | 4.714253642  |
| H254 | -4.730261812  | 8.459076143  | 3.092511780  |
| H255 | -3.013939234  | 10.907391780 | 1.289442448  |
| H256 | -0.315790626  | 7.823146980  | -0.472952553 |
| H257 | -8.582941890  | 7.316326234  | -0.531909452 |
| H258 | -7.371183084  | 4.448886851  | 3.351259334  |
| H259 | -4.776947234  | 7.986729440  | 0.406931382  |
| H260 | 0.375386841   | 5.680348800  | 3.089115704  |
| H261 | -0.229065434  | 6.256585491  | 5.378596374  |
| H262 | -1.050384506  | 5.688258621  | 1.021527817  |
| H263 | -4.008563773  | 2.265911361  | -6.872665413 |
| H264 | -0.424682979  | 8.592805968  | 7.567737244  |
| H265 | -1.469486922  | 3.002117479  | -6.054033318 |
| H266 | 0.572986009   | 7.432875508  | 2.975931515  |
| H267 | -5.651482975  | 5.051599907  | 1.695768054  |
| H268 | -4.487639111  | 5.454143887  | -4.083367090 |
| H269 | -1.887756022  | 7.704599027  | 8.040424495  |
| H270 | -1.466056929  | 10.358271238 | 0.745373648  |
| H271 | -4.872011589  | 9.701577099  | 0.536876257  |
| H272 | 0.685115975   | 1.426575214  | -6.820007526 |
| H273 | -1.341484020  | -0.307331809 | -6.302550936 |
| H274 | -10.284391315 | 6.808169307  | 1.195352029  |
| H275 | -3.331518717  | 3.126161179  | -3.762112127 |
| H276 | -1.858031945  | 7.770797903  | 3.396059622  |
| H277 | -0.416552286  | 8.663729506  | 1.078529486  |
| H278 | 0.619501988   | 6.207710324  | 0.838159967  |

|      |              |               |              |
|------|--------------|---------------|--------------|
| H279 | -2.716536475 | 7.096236632   | -0.093387859 |
| H280 | -5.995922164 | 3.564424034   | 7.016270691  |
| H281 | -5.540347890 | 6.587429117   | 5.713616943  |
| H282 | -7.208720836 | 8.006998441   | 7.646896684  |
| H283 | -4.838463078 | 4.349424946   | 8.112680223  |
| H284 | -7.996731339 | 6.086406154   | 4.944715484  |
| H285 | 9.709405802  | 4.424618319   | -0.442900617 |
| H286 | 10.023284471 | 2.794578404   | -1.074250060 |
| H287 | 10.229842683 | -1.123034493  | 1.898790866  |
| H288 | 11.855378028 | 4.212676553   | -1.640386791 |
| H289 | 11.031148414 | 3.971007835   | -3.033846030 |
| H290 | 1.148215887  | 2.438444357   | 7.237576843  |
| H291 | -1.086484889 | 3.115159602   | 9.277035694  |
| H292 | 0.826106681  | 6.641660184   | 7.757176914  |
| H293 | -0.586078904 | 2.689538491   | 6.864379788  |
| H294 | -0.092647745 | 4.026780050   | 10.199280646 |
| H295 | 4.917954583  | 5.922839723   | 4.102763436  |
| H296 | 1.274960859  | 4.603227960   | 8.367682283  |
| H297 | 3.749583320  | -8.920316642  | 1.449883308  |
| H298 | 6.743391719  | -8.277230678  | 1.609994028  |
| H299 | 5.379135207  | 5.486638550   | 1.799102879  |
| H300 | 0.919460586  | -3.071481091  | 4.398219290  |
| H301 | 4.415727637  | 7.462459689   | -0.919070433 |
| H302 | 3.133863826  | 2.117032194   | -3.112314041 |
| H303 | 3.052881552  | 6.457637532   | -0.432793385 |
| H304 | 2.249732651  | -6.751677329  | 1.934454307  |
| H305 | 4.991768391  | 4.646534508   | -0.003634436 |
| H306 | 3.395376384  | -5.785576341  | 1.001259486  |
| H307 | 4.657830485  | -7.779823960  | 0.433581195  |
| H308 | 5.235972230  | -6.456676840  | 2.564641529  |
| H309 | 4.106967859  | -7.497435217  | 3.453710762  |
| H310 | 1.192895190  | 5.198582086   | -6.151752623 |
| H311 | 5.362315529  | -10.732002406 | 0.578640019  |
| H312 | 6.923728762  | -10.935724381 | -2.048766526 |
| H313 | 2.567773064  | 3.001435761   | -0.838652928 |
| H314 | 6.260670281  | -13.007361562 | -0.100104453 |
| H315 | 5.645469763  | -12.747325864 | -1.595136294 |
| H316 | 3.736169364  | -4.331011204  | 2.879719952  |
| H317 | 1.205686800  | 5.028876824   | -0.616217580 |
| H318 | 2.436379738  | 3.383447023   | -5.135848504 |
| H319 | 10.646367729 | -6.636392399  | -0.198348265 |
| H320 | 10.608851867 | -3.186521261  | -0.332034885 |
| H321 | 8.276442142  | -6.379277120  | 0.308017586  |
| H322 | 11.247429334 | -6.062909821  | -1.502747123 |
| H323 | 7.027539824  | 7.792595758   | 2.938590331  |
| H324 | 6.791776918  | -4.155679353  | 1.972522836  |
| H325 | 4.848310095  | -5.670962423  | -2.035394281 |
| H326 | 7.469477241  | 4.037024343   | -0.512576954 |
| H327 | 7.146692229  | -5.569104650  | -3.139132785 |
| H328 | 9.971612390  | 0.622681981   | -3.285333968 |
| H329 | 7.537334246  | 0.346750886   | -2.580423821 |
| H330 | 8.063593698  | -11.846680299 | -1.048586773 |
| H331 | 2.471915656  | -2.682675627  | 3.713651775  |
| H332 | 7.699726109  | -5.911695896  | 3.340449124  |
| H333 | 6.405074420  | -3.646409598  | 3.390036053  |
| H334 | 7.289825764  | -8.225061378  | 3.739720894  |
| H335 | 0.931800014  | -6.469069025  | 3.519279956  |
| H336 | 10.111938712 | -4.936192305  | -5.583577103 |
| H337 | 8.702923904  | -2.931409537  | -3.011089610 |
| H338 | 8.943601345  | -4.245131724  | -1.841804049 |
| H339 | 6.857406586  | -4.086168875  | -4.096378230 |
| H340 | 5.576131274  | 3.126090953   | -1.727317694 |
| H341 | 0.505706427  | 6.327959567   | -2.645247216 |
| H342 | 0.244968945  | 6.351801240   | -5.180791742 |
| H343 | 4.135489386  | -4.121698022  | -1.480619861 |
| H344 | 8.603390265  | -6.810737758  | 2.450632690  |
| H345 | 8.746580667  | -7.852553168  | 0.456698981  |
| H346 | -0.128526790 | -5.151221883  | 3.845134043  |
| H347 | 11.553307169 | -0.780174433  | -1.830069729 |
| H348 | 9.090140425  | -2.910620078  | 0.533884555  |
| H349 | 6.247691107  | 3.859374732   | -3.216945169 |
| H350 | 4.312697989  | 7.537994984   | 3.655090382  |
| H351 | 1.627981395  | -4.835854485  | 6.696940949  |

|       |               |               |              |
|-------|---------------|---------------|--------------|
| H352  | 2.571441496   | -3.327053845  | 6.604541039  |
| H353  | 12.569923342  | -0.985231387  | 1.848968158  |
| H354  | 12.716913453  | -2.124338868  | 0.684201846  |
| H355  | 11.782968378  | -6.227965759  | 2.544058059  |
| H356  | 11.216794976  | -4.560047332  | 1.095519731  |
| H357  | 13.270012554  | -4.233150285  | 3.719761618  |
| H358  | 10.500901103  | -5.584419165  | 3.590290028  |
| H359  | 4.386247905   | -4.294453166  | 8.444799363  |
| H360  | -10.838683520 | 5.899114783   | 6.489303272  |
| H361  | 6.393024340   | -10.609025634 | 5.344356047  |
| H362  | 5.455707894   | -8.106758789  | 6.078194945  |
| H363  | -10.283981872 | 7.483775322   | 3.954666179  |
| H364  | -9.749498041  | 4.452141968   | 4.054820447  |
| H365  | -10.983196082 | 5.261060334   | 3.071065017  |
| H366  | 3.135341922   | -1.468036745  | -1.073047228 |
| H367  | -6.429703807  | 7.023086034   | -1.184537867 |
| H368  | 1.747396629   | -0.845904635  | 1.748250949  |
| H369  | 0.956026092   | -0.726429338  | -0.539578676 |
| H370  | -0.382022830  | 1.053316873   | -1.240941806 |
| Mo371 | 6.150955432   | -1.530761713  | -0.204089455 |
| N372  | 0.046535556   | -2.408515537  | -9.467546952 |
| N373  | -3.658423964  | -2.009058159  | -9.146738382 |
| N374  | -4.981197242  | -4.410370529  | -8.429729323 |
| N375  | -3.039976745  | -5.851972656  | -6.989875230 |
| N376  | -2.612165526  | -4.071953195  | -4.773946753 |
| N377  | -5.183520496  | -4.201702769  | -3.554951495 |
| N378  | -5.662824949  | -7.047859845  | -3.118311568 |
| N379  | -3.282156501  | -8.292387292  | -2.094303372 |
| N380  | -2.301534186  | -6.712246399  | -0.055365670 |
| N381  | -4.236528421  | -5.082725716  | 1.528442333  |
| N382  | -6.392359558  | -7.028659646  | 1.761250313  |
| N383  | 5.956748467   | -12.274708482 | -0.745049261 |
| N384  | 6.074754593   | -10.001495239 | 0.683396830  |
| N385  | 2.992348979   | -5.034969315  | 2.904380589  |
| N386  | 0.769403447   | -5.468193267  | 3.489590914  |
| N387  | 1.665919876   | -3.335303608  | 3.758630374  |
| N388  | 6.740119975   | -9.075042289  | 3.994218671  |
| N389  | -0.347008699  | 1.520335568   | -6.867513328 |
| N390  | 3.601060265   | -0.538072692  | -5.195233241 |
| N391  | -2.242518700  | 2.664118398   | -5.456751207 |
| N392  | -4.822275185  | 2.698701533   | -6.441969920 |
| N393  | -5.970592690  | 0.464991705   | -5.288583276 |
| N394  | -5.785021989  | 0.679557305   | -2.470215352 |
| N395  | -2.668483963  | 3.200269794   | -1.004437545 |
| N396  | -1.299203930  | 1.543383528   | -1.225104982 |
| N397  | -7.912144803  | 2.093381490   | -1.397323009 |
| N398  | -10.459169253 | 5.890194006   | -2.703759899 |
| N399  | -12.174130635 | 6.056595090   | -1.304833244 |
| N400  | 2.481071927   | -2.747238662  | 9.253888021  |
| N401  | -0.109038112  | 3.406649787   | 9.384309185  |
| N402  | -0.182858927  | 6.530788178   | 7.702736363  |
| N403  | -0.924474268  | 6.942300072   | 5.047057444  |
| N404  | -2.234986543  | 7.897317545   | 0.349946975  |
| N405  | -2.419264113  | 10.134238690  | 1.009198572  |
| N406  | -4.326307075  | 8.857819635   | 0.693027478  |
| N407  | -2.313685029  | 4.605785006   | 4.209798658  |
| N408  | -4.402087010  | 4.547203020   | 6.081584802  |
| N409  | -6.290037784  | 6.624727878   | 6.404775141  |
| N410  | -4.880726086  | 8.608657990   | 4.088951411  |
| N411  | -8.768422818  | 6.702038833   | 5.188986830  |
| N412  | 10.982352970  | 4.437027302   | -2.122937551 |
| N413  | 7.451692516   | 4.042774544   | -1.537508946 |
| N414  | 4.893260590   | 5.460199660   | -0.648847159 |
| N415  | 5.004251573   | 6.408008565   | 2.054828819  |
| N416  | 6.538605588   | 6.193501645   | -5.555569010 |
| N417  | 3.666549164   | 6.357915089   | -5.404722167 |
| N418  | 12.110069853  | -1.368432313  | 1.018087192  |
| N419  | 8.326886201   | -0.974931240  | -1.078461354 |
| N420  | 9.669736021   | 0.047024408   | -2.503868055 |
| N421  | 11.243405918  | -4.282094880  | 2.075879850  |
| N422  | -1.598031164  | 0.367618942   | 1.943845249  |
| N423  | -0.557520356  | 0.711922938   | 1.740811428  |
| O424  | -2.145168394  | -2.859298198  | -7.671898704 |

|                        |               |                                   |                           |
|------------------------|---------------|-----------------------------------|---------------------------|
| O425                   | -5.546354551  | -3.452302435                      | -6.441139650              |
| O426                   | -4.726643676  | -7.026830301                      | -5.988622111              |
| O427                   | -2.226761865  | -5.947501075                      | -3.544796445              |
| O428                   | -4.170412628  | -3.720110892                      | -1.571423197              |
| O429                   | -6.622339067  | -6.374342056                      | -1.156132114              |
| O430                   | -4.597274039  | -9.944246559                      | -1.196463028              |
| O431                   | -0.656448867  | -8.237471886                      | 0.455677893               |
| O432                   | -2.780302585  | -5.687376997                      | 3.184142109               |
| O433                   | -6.269881858  | -6.541667637                      | 3.974089566               |
| O434                   | -6.860617844  | -10.004799572                     | 3.705152785               |
| O435                   | 8.184998014   | -9.458681215                      | -0.092807261              |
| O436                   | 5.213888352   | -10.650649603                     | 3.306528893               |
| O437                   | 6.627868114   | -8.833377321                      | 7.581261973               |
| O438                   | -3.056387640  | 0.705224057                       | -4.581496900              |
| O439                   | 2.402725086   | 1.014822798                       | -6.347236268              |
| O440                   | -5.517611814  | 4.144577323                       | -4.807805767              |
| O441                   | -3.572372661  | 5.752424374                       | -3.838303111              |
| O442                   | -7.999351631  | 0.931889583                       | -6.268420828              |
| O443                   | -7.151181578  | -1.130299432                      | -2.229082991              |
| O444                   | -7.572351859  | 1.079043429                       | 0.624839854               |
| O445                   | -11.049593053 | 1.958804257                       | 0.238954546               |
| O446                   | 3.457401794   | -6.096739043                      | 8.697520726               |
| O447                   | -3.034418115  | -0.766801197                      | 6.643504663               |
| O448                   | -1.941321065  | 5.085250136                       | 7.781605081               |
| O449                   | -2.452260391  | 8.540715584                       | 5.673744949               |
| O450                   | -3.386113650  | 5.929386377                       | 2.678434933               |
| O451                   | -5.658838253  | 3.301365906                       | 4.622612529               |
| O452                   | -2.717415590  | 2.011709979                       | 5.899303458               |
| O453                   | -7.134186666  | 5.637976481                       | 8.288485218               |
| O454                   | -9.367769274  | 8.590069631                       | 6.317142486               |
| O455                   | -7.064954847  | 9.143321389                       | 3.692958952               |
| O456                   | -12.341661851 | 6.529724359                       | 5.258594141               |
| O457                   | -6.015746791  | 6.556654616                       | -0.433193892              |
| O458                   | 8.666170499   | 3.661489272                       | -3.451638743              |
| O459                   | 5.171385331   | 6.117760900                       | -2.827169968              |
| O460                   | 3.662743957   | 8.172217735                       | 1.484333772               |
| O461                   | 6.831936310   | 7.536782154                       | 4.951819823               |
| O462                   | 3.731241107   | 6.154164891                       | -7.675590832              |
| O463                   | 6.197626935   | 0.823684168                       | -6.275041518              |
| O464                   | 7.426018036   | 1.604627533                       | -4.585058532              |
| O465                   | 1.158231648   | 8.478864635                       | -3.998083317              |
| O466                   | 10.965446424  | -2.726336270                      | 3.697866195               |
| O467                   | 12.574791186  | -5.466985482                      | 5.189745625               |
| O468                   | 3.573353898   | -3.322612238                      | -3.911783163              |
| O469                   | 4.427487829   | -5.273497821                      | -4.549704831              |
| O470                   | 10.603940536  | -5.355076585                      | -3.388523918              |
| O471                   | 9.410066776   | -4.463616757                      | -5.087112294              |
| O472                   | 7.019192979   | -3.585988255                      | 0.228035142               |
| O473                   | 6.938841939   | -5.716810855                      | -0.503658900              |
| O474                   | 6.136467386   | -2.571963892                      | -2.029216468              |
| O475                   | 8.241205412   | -6.739860343                      | 3.373903701               |
| O476                   | 6.621096417   | -4.463420373                      | 2.898648356               |
| O477                   | -3.579744281  | 5.822337319                       | -1.099204444              |
| O478                   | 11.510711096  | -6.406233072                      | -0.624198080              |
| O479                   | 9.016276156   | -6.929294066                      | 0.699302972               |
| S480                   | 0.815655229   | 4.014706470                       | 5.402969643               |
| S481                   | 1.997970927   | 3.109803806                       | 1.838824554               |
| S482                   | 5.164143815   | 0.356266543                       | -1.248539694              |
| S483                   | 1.429422400   | 0.307506437                       | 4.003158991               |
| S484                   | 1.690663812   | 0.423420559                       | -0.532702806              |
| S485                   | 5.944187219   | 3.122352793                       | 1.308848490               |
| S486                   | 4.184732119   | -2.599689277                      | 0.672670116               |
| S487                   | 4.251046653   | 2.414560962                       | 4.578570388               |
| S488                   | 7.044997588   | -0.530553634                      | 1.766966993               |
| S489                   | 4.542373572   | -1.690136335                      | 4.286704932               |
| D 47(2)<br>dissociated |               | bm2cnx2b6x2hn2n2xd2th_2_53125.559 |                           |
| Fe( 139) 0.548 2.438   |               | C1 -2.390733432                   | -2.390804668 -8.779942711 |
| Fe( 140) 0.344 0.684   |               | C2 -1.333458527                   | -2.245011246 -9.879437935 |
| Fe( 141) 0.544 2.567   |               | C3 -4.725740148                   | -1.970309240 -8.141028512 |
|                        |               | C4 -5.125547786                   | -3.334907932 -7.584555787 |
|                        |               | C5 -5.311962850                   | -5.739454405 -7.955782410 |
|                        |               | C6 -4.346513118                   | -6.261975521 -6.886505870 |



|          |       |        |     |               |               |              |
|----------|-------|--------|-----|---------------|---------------|--------------|
| Fe( 142) | 0.550 | -2.646 | C7  | -2.077172636  | -6.164098535  | -5.968385864 |
| Fe( 143) | 0.601 | 3.171  | C8  | -2.312793589  | -5.404622617  | -4.658188468 |
| Fe( 144) | 0.522 | -2.276 | C9  | -2.915825545  | -3.302947292  | -3.583055934 |
| Fe( 145) | 0.326 | -0.310 | C10 | -4.152387169  | -3.784452586  | -2.807420322 |
|          |       |        | C11 | -6.396247583  | -4.723513643  | -2.898475071 |
|          |       |        | C12 | -6.242983017  | -6.136137972  | -2.316856388 |
|          |       |        | C13 | -5.659728785  | -8.471617017  | -2.774932878 |
|          |       |        | C14 | -4.471622557  | -8.967224958  | -1.943002020 |
|          |       |        | C15 | -2.082056107  | -8.726215229  | -1.424333109 |
|          |       |        | C16 | -1.613861201  | -7.865865923  | -0.246403125 |
|          |       |        | C17 | -1.904553835  | -5.690426632  | 0.912345171  |
|          |       |        | C18 | -3.008605765  | -5.481317912  | 1.965400050  |
|          |       |        | C19 | -1.446826030  | -4.381747781  | 0.217432393  |
|          |       |        | C20 | -1.209194622  | -3.252331667  | 1.220373033  |
|          |       |        | C21 | -0.194680316  | -4.631261737  | -0.631064141 |
|          |       |        | C22 | -5.356891027  | -4.868095736  | 2.417953378  |
|          |       |        | C23 | -6.034785043  | -6.209195881  | 2.766562463  |
|          |       |        | C24 | -6.354742759  | -3.827951710  | 1.859200570  |
|          |       |        | C25 | -7.602269384  | -3.725254811  | 2.746643639  |
|          |       |        | C26 | -5.686917516  | -2.455282013  | 1.711459469  |
|          |       |        | C27 | -7.066040788  | -8.267420766  | 1.999943210  |
|          |       |        | C28 | -6.318649938  | -9.133891008  | 2.995018032  |
|          |       |        | C29 | 7.071443773   | -11.364316990 | -1.039422400 |
|          |       |        | C30 | 7.168466508   | -10.173120157 | -0.085400361 |
|          |       |        | C31 | 5.912124056   | -8.961728727  | 1.705972653  |
|          |       |        | C32 | 5.928777799   | -9.642032391  | 3.089543175  |
|          |       |        | C33 | 4.600893942   | -8.189972382  | 1.464281578  |
|          |       |        | C34 | 4.351779707   | -7.069658257  | 2.477904599  |
|          |       |        | C35 | 3.195045802   | -6.174080195  | 2.034756828  |
|          |       |        | C36 | 1.839644355   | -4.596555472  | 3.431575768  |
|          |       |        | C37 | 6.906494260   | -9.626633690  | 5.334392551  |
|          |       |        | C38 | 6.266939524   | -8.791324921  | 6.423207321  |
|          |       |        | C39 | -0.946528149  | 0.652303901   | -5.866725753 |
|          |       |        | C40 | -2.174576520  | 1.334577996   | -5.238703684 |
|          |       |        | C41 | 0.023966188   | 0.277835379   | -4.722638905 |
|          |       |        | C42 | 1.179043609   | -0.674052877  | -5.099503355 |
|          |       |        | C43 | 2.453439962   | 0.001755246   | -5.603455177 |
|          |       |        | C44 | -3.182851763  | 3.530295525   | -4.783146492 |
|          |       |        | C45 | -4.600291278  | 3.504660043   | -5.372250826 |
|          |       |        | C46 | -2.671250132  | 4.978145820   | -4.654449902 |
|          |       |        | C47 | -6.146532569  | 2.342509801   | -6.878685199 |
|          |       |        | C48 | -6.782306454  | 1.177821274   | -6.102206370 |
|          |       |        | C49 | -6.435035978  | -0.630515592  | -4.466251853 |
|          |       |        | C50 | -6.463277935  | -0.396379157  | -2.955212560 |
|          |       |        | C51 | -5.774875787  | 0.955853312   | -1.029781394 |
|          |       |        | C52 | -7.181474474  | 1.345959131   | -0.515675883 |
|          |       |        | C53 | -4.887520825  | 2.159580855   | -0.677913267 |
|          |       |        | C54 | -3.423321546  | 2.055410427   | -0.959781590 |
|          |       |        | C55 | -2.544808128  | 1.011741704   | -1.117539870 |
|          |       |        | C56 | -1.367165378  | 2.892863621   | -1.176036114 |
|          |       |        | C57 | -9.124989768  | 2.784857858   | -1.006459717 |
|          |       |        | C58 | -10.167474925 | 1.759652738   | -0.561482597 |
|          |       |        | C59 | -9.624079413  | 3.576711624   | -2.238727694 |
|          |       |        | C60 | -10.591287154 | 4.692425428   | -1.968723660 |
|          |       |        | C61 | -11.666235638 | 4.767955589   | -1.104680588 |
|          |       |        | C62 | -11.451531297 | 6.660135937   | -2.237320391 |
|          |       |        | C63 | 2.197627878   | -4.044175289  | 8.609905863  |
|          |       |        | C64 | 3.447929816   | -4.902398949  | 8.597569250  |
|          |       |        | C65 | 1.789413878   | -3.826201158  | 7.128248754  |
|          |       |        | C66 | 0.512437922   | -3.032996783  | 6.986583704  |
|          |       |        | C67 | -0.743572578  | -3.669133369  | 6.974696257  |
|          |       |        | C68 | 0.542125430   | -1.631455226  | 6.877013499  |
|          |       |        | C69 | -1.929030018  | -2.934353347  | 6.865414230  |
|          |       |        | C70 | -0.632171078  | -0.883547810  | 6.779135940  |
|          |       |        | C71 | -1.867266729  | -1.538310411  | 6.770982675  |
|          |       |        | C72 | 0.289142442   | 4.151829049   | 8.165184992  |
|          |       |        | C73 | -0.715236881  | 5.269643749   | 7.854683527  |
|          |       |        | C74 | 0.372970715   | 3.171116228   | 6.987294075  |
|          |       |        | C75 | -1.016524262  | 7.664467901   | 7.376692512  |
|          |       |        | C76 | -1.540455510  | 7.735702984   | 5.940953463  |
|          |       |        | C77 | -1.375392146  | 6.821763708   | 3.650089773  |
|          |       |        | C78 | -2.466126210  | 5.743120004   | 3.471041179  |
|          |       |        | C79 | -0.143195031  | 6.586609718   | 2.756648110  |

|       |               |              |               |
|-------|---------------|--------------|---------------|
| C80   | -0.370885830  | 6.479002118  | 1.245421225   |
| C81   | -0.785524318  | 7.764383290  | 0.506785707   |
| C82   | -2.972956029  | 8.951218818  | 0.668813238   |
| C83   | -3.343447279  | 3.559587391  | 4.107262572   |
| C84   | -4.598064907  | 3.813688691  | 4.962476639   |
| C85   | -2.789093757  | 2.175073735  | 4.480725705   |
| C86   | -5.394905652  | 4.468025463  | 7.175902361   |
| C87   | -6.336919695  | 5.651921077  | 7.365182968   |
| C88   | -7.074324018  | 7.861878606  | 6.575618021   |
| C89   | -8.507603091  | 7.748560589  | 6.016826274   |
| C90   | -6.342142727  | 9.084800953  | 5.982574792   |
| C91   | -6.140216370  | 8.964772201  | 4.476010465   |
| C92   | -10.030227990 | 6.554587220  | 4.515628391   |
| C93   | -11.154886727 | 6.313102555  | 5.516166663   |
| C94   | -9.972820471  | 5.380814982  | 3.502722541   |
| C95   | -8.949697497  | 5.619961663  | 2.416738681   |
| C96   | -9.272350582  | 6.401115556  | 1.297293656   |
| C97   | -7.641117225  | 5.124252829  | 2.528582776   |
| C98   | -8.315547367  | 6.697410691  | 0.323729874   |
| C99   | -6.662223997  | 5.430820273  | 1.577290141   |
| C100  | -7.013668924  | 6.220565053  | 0.485640206   |
| C101  | 9.883659310   | 3.850252744  | -1.380033841  |
| C102  | 8.617837718   | 3.853372466  | -2.219382991  |
| C103  | 6.139309623   | 3.982501492  | -2.138075807  |
| C104  | 5.370106813   | 5.289002867  | -1.910671101  |
| C105  | 4.163259851   | 6.654140565  | -0.280505962  |
| C106  | 4.278889936   | 7.143133151  | 1.159887736   |
| C107  | 5.109191643   | 6.804509081  | 3.439720468   |
| C108  | 6.439819127   | 7.430232674  | 3.803366702   |
| C109  | 5.679356002   | 5.397924789  | -6.454803025  |
| C110  | 4.280608346   | 6.013839848  | -6.568271979  |
| C111  | 5.548492565   | 3.891474730  | -6.133047016  |
| C112  | 6.869999450   | 3.143576965  | -6.387113977  |
| C113  | 6.816225182   | 1.759700993  | -5.778326764  |
| C114  | 2.328611549   | 6.903995468  | -5.398047068  |
| C115  | 2.226486559   | 8.098738859  | -4.471909646  |
| C116  | 1.217341724   | 5.842850189  | -5.220036853  |
| C117  | 1.475207649   | 4.964194317  | -4.025326078  |
| C118  | 1.140301035   | 5.388038474  | -2.727790112  |
| C119  | 2.173006423   | 3.752682188  | -4.179417565  |
| C120  | 1.548703740   | 4.643155291  | -1.617390806  |
| C121  | 2.578445867   | 3.008995098  | -3.068024569  |
| C122  | 2.289533279   | 3.467747281  | -1.779817517  |
| C123  | 10.790583841  | -1.923494012 | 1.408311559   |
| C124  | 10.959066779  | -3.010397699 | 2.482126110   |
| C125  | 9.995350114   | -2.416075589 | 0.187215643   |
| C126  | 9.622185024   | -1.367745427 | -0.815479290  |
| C127  | 10.459553384  | -0.722598510 | -1.703199028  |
| C128  | 8.363463057   | -0.130089094 | -2.103879127  |
| C129  | 11.453102464  | -5.323032261 | 3.054765941   |
| C130  | 12.499602452  | -4.961504520 | 4.085825504   |
| C131  | 4.195598696   | -4.326781503 | -3.581119107  |
| C132  | 4.776854756   | -4.597553851 | -2.222096140  |
| C133  | 6.207656460   | -3.954239087 | -2.017087464  |
| C134  | 7.179756483   | -4.470978354 | -3.117212708  |
| C135  | 8.628442558   | -4.020377620 | -2.869928721  |
| C136  | 9.639827262   | -4.683956540 | -3.759771913  |
| C137  | 6.737422218   | -4.492815611 | -0.652940446  |
| C138  | 3.943630661   | 0.540657581  | 1.877916393   |
| Fe139 | 5.634123890   | 0.958595936  | 0.859485927   |
| Fe140 | 2.055772089   | 0.696346334  | 1.775673247   |
| Fe141 | 3.551899792   | 0.341059747  | 3.805151738   |
| Fe142 | 4.089875268   | 2.461923456  | 2.339010260   |
| Fe143 | 2.004224444   | 2.544510680  | 3.996140419   |
| Fe144 | 4.931142639   | -1.154776307 | 2.187731885   |
| Fe145 | 3.640745120   | -0.523823109 | 0.033169409   |
| H146  | 0.153704863   | -3.297841929 | -8.960936776  |
| H147  | 0.315119269   | -1.681472549 | -8.808484680  |
| H148  | -3.799057443  | -1.547260755 | -10.019163748 |
| H149  | -1.455052363  | -1.260765975 | -10.359703155 |
| H150  | -1.575905501  | -2.991730365 | -10.654792612 |
| H151  | -4.443236531  | -1.356441966 | -7.273814547  |
| H152  | -4.647880098  | -4.247360481 | -9.361071719  |

|      |              |              |              |
|------|--------------|--------------|--------------|
| H153 | -5.607252956 | -1.514326121 | -8.612013871 |
| H154 | -5.292128509 | -6.417902057 | -8.818962281 |
| H155 | -2.824344535 | -5.130925959 | -7.675552377 |
| H156 | -6.317358234 | -5.765754163 | -7.516567036 |
| H157 | -2.073088435 | -3.338128668 | -2.879733806 |
| H158 | -2.601596320 | -3.632145871 | -5.688432542 |
| H159 | -1.078557106 | -5.923245235 | -6.357119963 |
| H160 | -6.680153427 | -4.059914117 | -2.072100056 |
| H161 | -5.174777627 | -4.138655463 | -4.572292459 |
| H162 | -2.105773915 | -7.234212672 | -5.729231071 |
| H163 | -3.061988506 | -2.256304989 | -3.888643302 |
| H164 | -5.404800381 | -6.809145803 | -4.086824493 |
| H165 | -7.212626767 | -4.732733989 | -3.633556597 |
| H166 | -0.370797678 | -5.392248543 | -1.403796562 |
| H167 | 0.111420878  | -3.699945892 | -1.132413467 |
| H168 | 0.649842273  | -4.957759697 | -0.004001453 |
| H169 | -2.262187563 | -4.069924573 | -0.455465374 |
| H170 | -5.676924979 | -9.061158639 | -3.702914355 |
| H171 | -4.813005190 | -2.488034849 | 1.045049892  |
| H172 | -6.259484594 | -6.723022458 | 0.758328523  |
| H173 | -8.152810545 | -4.675500817 | 2.802959964  |
| H174 | -0.934655973 | -2.332741135 | 0.684849892  |
| H175 | -0.379241552 | -3.477477451 | 1.904471001  |
| H176 | 1.396684457  | -4.631109043 | 9.099558376  |
| H177 | -6.403398197 | -1.731992193 | 1.295169403  |
| H178 | -8.283985127 | -2.962917486 | 2.342237108  |
| H179 | -5.355706541 | -2.078202141 | 2.692789044  |
| H180 | -7.330758849 | -3.430183716 | 3.772889761  |
| H181 | -6.675634592 | -4.172468029 | 0.858968436  |
| H182 | -4.954108759 | -4.507144181 | 3.375740125  |
| H183 | -4.336242091 | -4.794576034 | 0.527580722  |
| H184 | -2.101074391 | -3.027044831 | 1.821646331  |
| H185 | -1.785892090 | 2.065981239  | 4.035129819  |
| H186 | -3.458070290 | 1.424586011  | 4.031576235  |
| H187 | -2.837945711 | 1.063919924  | 6.093820028  |
| H188 | -3.791468402 | -1.322880390 | 6.604397290  |
| H189 | -0.588936015 | 0.200547246  | 6.670378014  |
| H190 | 1.503230639  | -1.113364594 | 6.837885151  |
| H191 | -0.800932696 | -4.758674247 | 7.047205597  |
| H192 | -3.011168996 | -6.474638968 | -0.745916421 |
| H193 | -1.253017588 | -8.754593994 | -2.146747535 |
| H194 | -2.237793331 | -9.744135428 | -1.044512913 |
| H195 | -3.212080134 | -7.544943562 | -2.786459709 |
| H196 | -6.561635987 | -8.714339030 | -2.198798657 |
| H197 | -2.896687620 | -3.444087142 | 6.844313158  |
| H198 | -1.060230783 | -6.116322270 | 1.469553540  |
| H199 | -8.094088051 | -8.109794147 | 2.365399980  |
| H200 | -7.119165501 | -8.832958200 | 1.056095328  |
| H201 | -5.215493852 | -8.972980649 | 3.024802463  |
| H202 | 7.968630592  | -9.786843901 | 5.575959711  |
| H203 | 4.495365832  | -0.151592559 | -5.534914355 |
| H204 | 4.903986766  | -6.030236947 | -4.142346749 |
| H205 | 7.027939041  | 3.042770751  | -7.470509148 |
| H206 | 7.713528883  | 3.710827041  | -5.968131668 |
| H207 | 4.759713507  | 3.434989933  | -6.751075935 |
| H208 | 3.186045335  | 8.647356122  | -4.322404789 |
| H209 | 6.088151495  | 5.486363908  | -7.473123136 |
| H210 | 0.426997168  | 1.205874948  | -4.285276382 |
| H211 | 0.849427143  | -1.373042786 | -5.887368238 |
| H212 | 4.155210064  | 6.216915874  | -4.503731138 |
| H213 | 2.193749170  | 7.341710193  | -6.408572962 |
| H214 | 6.296326229  | 6.055241355  | -4.584577886 |
| H215 | 3.644901625  | -1.367590098 | -4.588035667 |
| H216 | 5.232418029  | 3.776965901  | -5.084436392 |
| H217 | 7.516245935  | 5.882179737  | -5.675993677 |
| H218 | -0.634875235 | 1.308168472  | -7.800146775 |
| H219 | -0.575231588 | -0.214009084 | -3.942297900 |
| H220 | 7.855309105  | 2.456295071  | -4.259986869 |
| H221 | 1.424480277  | -1.297215595 | -4.228127787 |
| H222 | -5.475420582 | 0.059998765  | -0.466791381 |
| H223 | -2.709455153 | -0.059538329 | -1.128200934 |
| H224 | -7.468376035 | -0.844401481 | -4.768195725 |
| H225 | -4.951526499 | 0.694415045  | -5.243374674 |

|      |               |              |              |
|------|---------------|--------------|--------------|
| H226 | -7.550755400  | 2.198580159  | -2.339397370 |
| H227 | -12.074559492 | 4.070826866  | -0.382152486 |
| H228 | -10.114188880 | 0.789852110  | -1.112800230 |
| H229 | -10.039206981 | 2.868405793  | -2.977714660 |
| H230 | -8.929561527  | 3.472148602  | -0.167945280 |
| H231 | -11.663635597 | 7.672189891  | -2.571779659 |
| H232 | -5.025213430  | 2.350795180  | 0.399638335  |
| H233 | -5.281134905  | 3.048235268  | -1.197509016 |
| H234 | -12.997053196 | 6.414124190  | -0.795070116 |
| H235 | -8.742995219  | 4.038189184  | -2.712447630 |
| H236 | -5.064902200  | 1.123844317  | -3.053938566 |
| H237 | -5.850329956  | -1.541562570 | -4.664046153 |
| H238 | -6.817163893  | 3.204032292  | -6.767613378 |
| H239 | -0.525607284  | 3.576006145  | -1.250865897 |
| H240 | -6.120377959  | 2.071398305  | -7.942584930 |
| H241 | 2.559719445   | -2.900184098 | 10.272705624 |
| H242 | 1.726225316   | -2.113415952 | 9.105231527  |
| H243 | -1.428177932  | 4.394842614  | 4.670397941  |
| H244 | -3.688637539  | 3.522822190  | 3.063660305  |
| H245 | -3.456107144  | 4.748244399  | 6.386126596  |
| H246 | -3.027417192  | 4.202552144  | -0.944689717 |
| H247 | -3.526077347  | 5.886501024  | -2.090332688 |
| H248 | -4.534711297  | 5.906764789  | -0.865108503 |
| H249 | -1.683276067  | 4.970437912  | -4.174100634 |
| H250 | -2.571939810  | 5.435047871  | -5.653741351 |
| H251 | -5.387851020  | 9.211227057  | 6.514365640  |
| H252 | -6.968331376  | 9.966447208  | 6.172379264  |
| H253 | -4.079475055  | 8.554749482  | 4.704056469  |
| H254 | -4.741362708  | 8.442501855  | 3.083925748  |
| H255 | -3.001637822  | 10.888729041 | 1.333919648  |
| H256 | -0.328426246  | 7.784201187  | -0.494133673 |
| H257 | -8.585453609  | 7.296497121  | -0.549804058 |
| H258 | -7.355252535  | 4.484556016  | 3.368410800  |
| H259 | -4.779730945  | 7.991573532  | 0.405292429  |
| H260 | 0.351567228   | 5.657881421  | 3.082432628  |
| H261 | -0.238286909  | 6.249890281  | 5.364688569  |
| H262 | -1.082878585  | 5.670734776  | 1.015552910  |
| H263 | -4.000803565  | 2.266493221  | -6.867075584 |
| H264 | -0.439975747  | 8.579677088  | 7.568809616  |
| H265 | -1.448555096  | 3.011898122  | -6.045405235 |
| H266 | 0.563843130   | 7.408825239  | 2.954563243  |
| H267 | -5.632929178  | 5.093886272  | 1.717250916  |
| H268 | -4.468121065  | 5.469411749  | -4.085951737 |
| H269 | -1.899218623  | 7.678788259  | 8.031422604  |
| H270 | -1.454009941  | 10.336036133 | 0.792766325  |
| H271 | -4.868164919  | 9.703989813  | 0.571644381  |
| H272 | 0.707737757   | 1.433650348  | -6.812948094 |
| H273 | -1.324187165  | -0.289956958 | -6.306618311 |
| H274 | -10.288020321 | 6.785245329  | 1.177050954  |
| H275 | -3.321082555  | 3.135478590  | -3.762190018 |
| H276 | -1.862882605  | 7.769312088  | 3.384281227  |
| H277 | -0.402387771  | 8.637183017  | 1.050244635  |
| H278 | 0.593364650   | 6.163867165  | 0.825147452  |
| H279 | -2.727587548  | 7.095661572  | -0.104301783 |
| H280 | -6.034449169  | 3.588444909  | 7.011852372  |
| H281 | -5.534941641  | 6.598906160  | 5.733874822  |
| H282 | -7.207251851  | 8.040207115  | 7.652332426  |
| H283 | -4.864745891  | 4.323889066  | 8.127196370  |
| H284 | -7.982829188  | 6.082837322  | 4.957498334  |
| H285 | 9.727292727   | 4.422237159  | -0.453735219 |
| H286 | 10.040999209  | 2.791583857  | -1.084211144 |
| H287 | 10.223922127  | -1.117676708 | 1.896434453  |
| H288 | 11.871004654  | 4.212832995  | -1.653079981 |
| H289 | 11.048359948  | 3.961328777  | -3.045467268 |
| H290 | 1.141561370   | 2.421294093  | 7.213002421  |
| H291 | -1.057082035  | 3.114203044  | 9.296507610  |
| H292 | 0.820665832   | 6.630823665  | 7.735187135  |
| H293 | -0.599557979  | 2.674523179  | 6.860953572  |
| H294 | -0.045006494  | 4.039764626  | 10.189017691 |
| H295 | 4.922257236   | 5.935954282  | 4.088368455  |
| H296 | 1.284531568   | 4.594729514  | 8.327424838  |
| H297 | 3.762068246   | -8.905790000 | 1.468107672  |
| H298 | 6.758671016   | -8.269836884 | 1.615340807  |

|       |               |               |              |
|-------|---------------|---------------|--------------|
| H299  | 5.405816031   | 5.507650755   | 1.781462284  |
| H300  | 0.962147314   | -3.045401309  | 4.429496848  |
| H301  | 4.487645701   | 7.480635686   | -0.927400968 |
| H302  | 3.129749887   | 2.075550391   | -3.199312777 |
| H303  | 3.087800979   | 6.515061380   | -0.476137412 |
| H304  | 2.257210071   | -6.740807641  | 1.974041705  |
| H305  | 4.995895947   | 4.656918924   | -0.008200573 |
| H306  | 3.395126760   | -5.779939406  | 1.024109877  |
| H307  | 4.666655852   | -7.762624750  | 0.450440090  |
| H308  | 5.250183819   | -6.442081755  | 2.577313963  |
| H309  | 4.131023568   | -7.484813481  | 3.474625132  |
| H310  | 1.186503772   | 5.239099854   | -6.138353399 |
| H311  | 5.365668325   | -10.717897923 | 0.585807960  |
| H312  | 6.928046540   | -10.936315753 | -2.043745576 |
| H313  | 2.625711829   | 2.920611529   | -0.899363195 |
| H314  | 6.252242341   | -12.995237567 | -0.086458317 |
| H315  | 5.647145554   | -12.743157575 | -1.587759159 |
| H316  | 3.749709668   | -4.312556353  | 2.885320710  |
| H317  | 1.307001746   | 4.972363920   | -0.605453981 |
| H318  | 2.404544256   | 3.388244436   | -5.182480741 |
| H319  | 10.655532954  | -6.633784575  | -0.193959563 |
| H320  | 10.593835077  | -3.184260743  | -0.334241656 |
| H321  | 8.282954894   | -6.381292030  | 0.315345323  |
| H322  | 11.249682109  | -6.061663987  | -1.500063063 |
| H323  | 7.042364887   | 7.802328131   | 2.939546199  |
| H324  | 6.793072600   | -4.159677541  | 1.971280960  |
| H325  | 4.837946847   | -5.678792879  | -2.028500702 |
| H326  | 7.490534796   | 4.030276489   | -0.517847590 |
| H327  | 7.137810193   | -5.571242473  | -3.132681194 |
| H328  | 9.945648501   | 0.630900923   | -3.284344333 |
| H329  | 7.512556896   | 0.338407507   | -2.581642413 |
| H330  | 8.063835874   | -11.846448208 | -1.040612298 |
| H331  | 2.506585440   | -2.664405230  | 3.730964950  |
| H332  | 7.712131449   | -5.906343583  | 3.346983188  |
| H333  | 6.451965832   | -3.643300224  | 3.400121820  |
| H334  | 7.296076227   | -8.215959469  | 3.754355154  |
| H335  | 0.959206335   | -6.451688923  | 3.587467823  |
| H336  | 10.117498631  | -4.937485412  | -5.572224090 |
| H337  | 8.688736859   | -2.931685302  | -3.015947010 |
| H338  | 8.932023024   | -4.238709491  | -1.840439950 |
| H339  | 6.840631275   | -4.093082430  | -4.092755778 |
| H340  | 5.589983184   | 3.125871484   | -1.716640536 |
| H341  | 0.588489250   | 6.321829238   | -2.593048452 |
| H342  | 0.262330711   | 6.383539976   | -5.134127608 |
| H343  | 4.127042371   | -4.130112868  | -1.469969873 |
| H344  | 8.614247518   | -6.811097044  | 2.460576438  |
| H345  | 8.753202200   | -7.853642000  | 0.461828530  |
| H346  | -0.094674452  | -5.127980283  | 3.917202978  |
| H347  | 11.534999934  | -0.762446622  | -1.829923337 |
| H348  | 9.075804239   | -2.906163890  | 0.531980263  |
| H349  | 6.254510155   | 3.846352829   | -3.214595209 |
| H350  | 4.324673703   | 7.553820640   | 3.638060832  |
| H351  | 1.667924234   | -4.819956186  | 6.670750854  |
| H352  | 2.614731109   | -3.310666956  | 6.611992900  |
| H353  | 12.564029144  | -0.986262443  | 1.839919759  |
| H354  | 12.703674497  | -2.125467862  | 0.673535849  |
| H355  | 11.815986639  | -6.216377275  | 2.522478546  |
| H356  | 11.264449200  | -4.538328885  | 1.084530332  |
| H357  | 13.266426258  | -4.224589560  | 3.743488998  |
| H358  | 10.512995656  | -5.599382445  | 3.559190465  |
| H359  | 4.398163864   | -4.329418671  | 8.466004401  |
| H360  | -10.831279058 | 5.883159228   | 6.493256451  |
| H361  | 6.400864974   | -10.608703947 | 5.345388019  |
| H362  | 5.415220581   | -8.149283985  | 6.091805017  |
| H363  | -10.267595856 | 7.483894573   | 3.972285858  |
| H364  | -9.750171352  | 4.446839030   | 4.041657125  |
| H365  | -10.978666606 | 5.278067851   | 3.070004597  |
| H366  | 3.101964782   | -1.375229612  | -1.088031832 |
| H367  | -6.422742969  | 7.016128746   | -1.192840259 |
| H368  | 1.548479879   | -0.725418001  | 1.812829875  |
| H369  | 0.919348893   | -0.788667660  | -0.445851931 |
| H370  | -0.361656880  | 1.073624288   | -1.236529109 |
| Mo371 | 6.135650671   | -1.530569829  | -0.200696781 |

|      |               |               |              |
|------|---------------|---------------|--------------|
| N372 | 0.049614124   | -2.415876735  | -9.468957964 |
| N373 | -3.652031971  | -2.004898286  | -9.123046394 |
| N374 | -4.996807972  | -4.396289321  | -8.417290483 |
| N375 | -3.057393400  | -5.854551425  | -6.997788366 |
| N376 | -2.626148785  | -4.087967922  | -4.774082861 |
| N377 | -5.198144009  | -4.220347829  | -3.553009811 |
| N378 | -5.675138873  | -7.062110598  | -3.132826046 |
| N379 | -3.297899986  | -8.292028847  | -2.090684149 |
| N380 | -2.290556126  | -6.702076814  | -0.064356748 |
| N381 | -4.223666212  | -5.059078062  | 1.507702875  |
| N382 | -6.371859631  | -7.019408074  | 1.730689532  |
| N383 | 5.953648162   | -12.266500515 | -0.738279446 |
| N384 | 6.081127863   | -9.990002374  | 0.687224366  |
| N385 | 3.010136859   | -5.019776574  | 2.926408972  |
| N386 | 0.798330270   | -5.450674110  | 3.555837650  |
| N387 | 1.688975306   | -3.309546930  | 3.767427446  |
| N388 | 6.746151815   | -9.066646382  | 4.006106550  |
| N389 | -0.323289111  | 1.539244006   | -6.854686387 |
| N390 | 3.612955614   | -0.551962653  | -5.202699275 |
| N391 | -2.228216115  | 2.673519769   | -5.456018482 |
| N392 | -4.812015727  | 2.705814428   | -6.438855543 |
| N393 | -5.951035374  | 0.469577078   | -5.282651229 |
| N394 | -5.773879605  | 0.686606789   | -2.466678463 |
| N395 | -2.655454426  | 3.214316100   | -1.007125750 |
| N396 | -1.284159317  | 1.561975182   | -1.253842138 |
| N397 | -7.901223768  | 2.094493424   | -1.390004198 |
| N398 | -10.468143423 | 5.880758877   | -2.671816274 |
| N399 | -12.197626280 | 6.027289312   | -1.289235903 |
| N400 | 2.499025121   | -2.767076163  | 9.260110111  |
| N401 | -0.079118604  | 3.410336127   | 9.381527853  |
| N402 | -0.188323381  | 6.516838747   | 7.688770833  |
| N403 | -0.930319422  | 6.940270998   | 5.036124384  |
| N404 | -2.238767620  | 7.891566473   | 0.340664194  |
| N405 | -2.410562960  | 10.115364063  | 1.046683701  |
| N406 | -4.324463298  | 8.855336818   | 0.706090749  |
| N407 | -2.337500256  | 4.611300486   | 4.213253652  |
| N408 | -4.419897893  | 4.549772751   | 6.097824330  |
| N409 | -6.281594458  | 6.644049999   | 6.428069770  |
| N410 | -4.893037736  | 8.602967978   | 4.078484705  |
| N411 | -8.757233625  | 6.694194283   | 5.203252376  |
| N412 | 10.997361455  | 4.432048156   | -2.137000583 |
| N413 | 7.467828352   | 4.036008939   | -1.542464245 |
| N414 | 4.907802913   | 5.467480211   | -0.657448105 |
| N415 | 5.022775018   | 6.424350154   | 2.041009082  |
| N416 | 6.546160084   | 6.187491186   | -5.572291972 |
| N417 | 3.679520596   | 6.373048007   | -5.398670974 |
| N418 | 12.099752145  | -1.369035783  | 1.011249438  |
| N419 | 8.310157034   | -0.978135680  | -1.080595559 |
| N420 | 9.647432048   | 0.052407710   | -2.503762752 |
| N421 | 11.267586836  | -4.271607594  | 2.068614279  |
| N422 | -2.064853275  | -0.186714063  | 1.954285193  |
| N423 | -1.668853344  | 0.846679700   | 1.895094652  |
| O424 | -2.134924817  | -2.866739068  | -7.658457649 |
| O425 | -5.556128869  | -3.443025956  | -6.424563817 |
| O426 | -4.739516370  | -7.032688086  | -5.995696698 |
| O427 | -2.233509478  | -5.969161857  | -3.556038519 |
| O428 | -4.180839407  | -3.757302621  | -1.566934178 |
| O429 | -6.661698334  | -6.407921494  | -1.177993132 |
| O430 | -4.607499995  | -9.962598825  | -1.218778469 |
| O431 | -0.657377065  | -8.239456378  | 0.446566826  |
| O432 | -2.787220382  | -5.691860591  | 3.168094316  |
| O433 | -6.266380873  | -6.530010501  | 3.943791059  |
| O434 | -6.860810938  | -9.996854860  | 3.668967449  |
| O435 | 8.192845810   | -9.457500775  | -0.094501481 |
| O436 | 5.231876673   | -10.648685927 | 3.306368968  |
| O437 | 6.627644327   | -8.818161716  | 7.588900424  |
| O438 | -3.039583034  | 0.712239262   | -4.583703729 |
| O439 | 2.421936455   | 0.997682252   | -6.362548755 |
| O440 | -5.501965600  | 4.162727040   | -4.812850678 |
| O441 | -3.552827575  | 5.763202213   | -3.835953159 |
| O442 | -7.982842846  | 0.926814145   | -6.259554436 |
| O443 | -7.111317621  | -1.144828656  | -2.221309858 |
| O444 | -7.540558388  | 1.101936134   | 0.638501855  |

|      |               |              |              |
|------|---------------|--------------|--------------|
| O445 | -11.015738491 | 1.966111074  | 0.288185838  |
| O446 | 3.445671509   | -6.121511765 | 8.691624973  |
| O447 | -2.999901773  | -0.755731756 | 6.652491818  |
| O448 | -1.939931662  | 5.062269179  | 7.776719196  |
| O449 | -2.461947092  | 8.532781108  | 5.668969755  |
| O450 | -3.411015623  | 5.937408511  | 2.684864886  |
| O451 | -5.684146418  | 3.312393776  | 4.638559071  |
| O452 | -2.735527538  | 2.018492993  | 5.898733004  |
| O453 | -7.125227800  | 5.668515309  | 8.318943651  |
| O454 | -9.372137991  | 8.582317095  | 6.321974799  |
| O455 | -7.077191640  | 9.133798143  | 3.679290226  |
| O456 | -12.328737766 | 6.525203098  | 5.260113696  |
| O457 | -6.008191779  | 6.560654126  | -0.435088667 |
| O458 | 8.678260358   | 3.656148342  | -3.459752780 |
| O459 | 5.207913883   | 6.119849376  | -2.831959985 |
| O460 | 3.677236577   | 8.185306851  | 1.469500622  |
| O461 | 6.839077482   | 7.537206324  | 4.951882777  |
| O462 | 3.715579815   | 6.141289772  | -7.667292830 |
| O463 | 6.212486550   | 0.818930925  | -6.285205427 |
| O464 | 7.434598744   | 1.602012197  | -4.591852654 |
| O465 | 1.187710110   | 8.490248518  | -3.958817911 |
| O466 | 10.905645016  | -2.737752307 | 3.695641000  |
| O467 | 12.565737156  | -5.480451477 | 5.191040086  |
| O468 | 3.571355396   | -3.327711176 | -3.907605756 |
| O469 | 4.403783071   | -5.290339713 | -4.536607957 |
| O470 | 10.598593054  | -5.350215068 | -3.375885954 |
| O471 | 9.407866314   | -4.470085381 | -5.081739272 |
| O472 | 6.988295650   | -3.594488609 | 0.241373948  |
| O473 | 6.937076322   | -5.721582545 | -0.501980253 |
| O474 | 6.122901793   | -2.577953585 | -2.021244921 |
| O475 | 8.253987143   | -6.735299458 | 3.384361328  |
| O476 | 6.627118853   | -4.463908255 | 2.900712587  |
| O477 | -3.577625089  | 5.804382848  | -1.096374847 |
| O478 | 11.518565670  | -6.408748653 | -0.624584877 |
| O479 | 9.022791472   | -6.930699815 | 0.706146744  |
| S480 | 0.792959099   | 4.000168666  | 5.385998868  |
| S481 | 1.999993348   | 3.088328131  | 1.800846444  |
| S482 | 5.171525066   | 0.377491991  | -1.261728101 |
| S483 | 1.266045551   | 0.356073997  | 3.868276437  |
| S484 | 1.601548589   | 0.390376107  | -0.406413364 |
| S485 | 5.956858050   | 3.133495956  | 1.305640278  |
| S486 | 4.134615352   | -2.562906776 | 0.661209856  |
| S487 | 4.217843029   | 2.391439438  | 4.575334468  |
| S488 | 7.046084032   | -0.554974928 | 1.781779422  |
| S489 | 4.468327894   | -1.639745088 | 4.302081082  |

### Structure D 35(2)

|            |              |                                     |                                         |
|------------|--------------|-------------------------------------|-----------------------------------------|
| D 35(2)    |              | bm2cnx2b6x2hn2n2xd235tf 2 53135.362 |                                         |
| associated |              | C1                                  | -2.403560352 -1.860999197 -8.925882758  |
| Fe( 139)   | 0.554 -2.430 | C2                                  | -1.351622923 -1.618669777 -10.014717415 |
| Fe( 140)   | 0.284 0.070  | C3                                  | -4.745369125 -1.549408846 -8.256185021  |
| Fe( 141)   | 0.547 -2.665 | C4                                  | -5.087001094 -2.959401989 -7.779307769  |
| Fe( 142)   | 0.573 2.825  | C5                                  | -5.199100258 -5.341339184 -8.305274509  |
| Fe( 143)   | 0.618 3.237  | C6                                  | -4.210212714 -5.897024814 -7.275913864  |
| Fe( 144)   | 0.508 2.227  | C7                                  | -1.937181661 -5.788654819 -6.366434726  |
| Fe( 145)   | 0.292 0.158  | C8                                  | -2.178497907 -5.133456648 -5.003300145  |
|            |              | C9                                  | -2.841025151 -3.126325890 -3.782856717  |
|            |              | C10                                 | -4.058707697 -3.697491678 -3.040412465  |
|            |              | C11                                 | -6.273256849 -4.693255960 -3.186889875  |
|            |              | C12                                 | -6.079137203 -6.134506660 -2.696293146  |
|            |              | C13                                 | -5.438810386 -8.419109382 -3.307666576  |
|            |              | C14                                 | -4.236295239 -8.928766032 -2.506530773  |
|            |              | C15                                 | -1.843232285 -8.681933810 -2.007480743  |
|            |              | C16                                 | -1.398792048 -7.887972683 -0.776109254  |
|            |              | C17                                 | -1.749242904 -5.809454167 0.528912511   |
|            |              | C18                                 | -2.850916685 -5.715895826 1.599015099   |
|            |              | C19                                 | -1.335752718 -4.435474144 -0.067916597  |
|            |              | C20                                 | -1.133845273 -3.364166510 1.007708365   |
|            |              | C21                                 | -0.077008114 -4.581361619 -0.932107034  |
|            |              | C22                                 | -5.209299688 -5.191229696 2.107147722   |
|            |              | C23                                 | -5.849441919 -6.568027816 2.373359752   |
|            |              | C24                                 | -6.233814787 -4.135983384 1.624229383   |

|     |               |               |              |
|-----|---------------|---------------|--------------|
| C25 | -7.473707546  | -4.119899317  | 2.523869724  |
| C26 | -5.591254419  | -2.743138602  | 1.566997739  |
| C27 | -6.836582033  | -8.596536850  | 1.476507299  |
| C28 | -6.053331691  | -9.508161045  | 2.401642636  |
| C29 | 7.386168580   | -11.048056543 | -1.854826402 |
| C30 | 7.454656194   | -9.920808501  | -0.823234844 |
| C31 | 6.174815526   | -8.881746765  | 1.057541370  |
| C32 | 6.221377939   | -9.650591535  | 2.391526571  |
| C33 | 4.834567843   | -8.147289830  | 0.873240310  |
| C34 | 4.561219406   | -7.098768027  | 1.953648584  |
| C35 | 3.377221430   | -6.211099931  | 1.573471147  |
| C36 | 2.004275746   | -4.773607028  | 3.098205495  |
| C37 | 7.216788772   | -9.750359945  | 4.626502227  |
| C38 | 6.556922340   | -8.990336893  | 5.757561094  |
| C39 | -1.026331246  | 1.014351310   | -5.821690253 |
| C40 | -2.262604047  | 1.621486342   | -5.135814850 |
| C41 | -0.028595018  | 0.603549650   | -4.712281431 |
| C42 | 1.147384198   | -0.291232536  | -5.156243866 |
| C43 | 2.398385366   | 0.462479423   | -5.602568083 |
| C44 | -3.318087249  | 3.749456037   | -4.512416136 |
| C45 | -4.741604561  | 3.717987122   | -5.086792292 |
| C46 | -2.854360916  | 5.202893928   | -4.292368594 |
| C47 | -6.265248885  | 2.635582312   | -6.672573592 |
| C48 | -6.859829568  | 1.400796542   | -5.974751609 |
| C49 | -6.449378363  | -0.502324927  | -4.469295205 |
| C50 | -6.480017792  | -0.370363558  | -2.945258658 |
| C51 | -5.823481255  | 0.858447548   | -0.930648508 |
| C52 | -7.241459903  | 1.159098863   | -0.379661927 |
| C53 | -4.968903579  | 2.054771185   | -0.482786800 |
| C54 | -3.501519017  | 2.019019240   | -0.767244835 |
| C55 | -2.591583871  | 1.013545726   | -0.983025844 |
| C56 | -1.470277567  | 2.932980070   | -0.925323137 |
| C57 | -9.246353356  | 2.564639227   | -0.761078400 |
| C58 | -10.262633558 | 1.480710728   | -0.414624739 |
| C59 | -9.755648109  | 3.434695399   | -1.934155797 |
| C60 | -10.745307141 | 4.507915630   | -1.589718432 |
| C61 | -11.823114772 | 4.506927352   | -0.724536566 |
| C62 | -11.643674477 | 6.472430757   | -1.734160256 |
| C63 | 2.379703052   | -4.550038179  | 8.306554708  |
| C64 | 3.664038319   | -5.353868417  | 8.222903644  |
| C65 | 1.944261038   | -4.251745542  | 6.848551637  |
| C66 | 0.638875268   | -3.497209301  | 6.769708336  |
| C67 | -0.596012911  | -4.169613075  | 6.703754212  |
| C68 | 0.621477877   | -2.090179828  | 6.777586900  |
| C69 | -1.804102525  | -3.466451943  | 6.644457542  |
| C70 | -0.575482308  | -1.374654648  | 6.733245067  |
| C71 | -1.788647541  | -2.064845361  | 6.664659259  |
| C72 | 0.233773256   | 3.601463130   | 8.435007936  |
| C73 | -0.799665544  | 4.710569718   | 8.203721835  |
| C74 | 0.341581613   | 2.713473358   | 7.185239846  |
| C75 | -1.162836670  | 7.121646007   | 7.876239356  |
| C76 | -1.709192507  | 7.265919986   | 6.453759381  |
| C77 | -1.542362867  | 6.507229370   | 4.105839287  |
| C78 | -2.599944627  | 5.409493551   | 3.853638271  |
| C79 | -0.308859708  | 6.375966768   | 3.193344739  |
| C80 | -0.536522612  | 6.384094697   | 1.678293897  |
| C81 | -1.006461309  | 7.706543209   | 1.050487897  |
| C82 | -3.228762222  | 8.803555958   | 1.308507663  |
| C83 | -3.409607292  | 3.162509077   | 4.342470661  |
| C84 | -4.659809879  | 3.307195396   | 5.233291828  |
| C85 | -2.805325938  | 1.769051235   | 4.585608231  |
| C86 | -5.454160135  | 3.813634405   | 7.488954206  |
| C87 | -6.448784246  | 4.941464547   | 7.747973705  |
| C88 | -7.261388880  | 7.174950257   | 7.123596143  |
| C89 | -8.697846102  | 7.082814153   | 6.566486390  |
| C90 | -6.554954613  | 8.456336272   | 6.633182473  |
| C91 | -6.356229357  | 8.460483781   | 5.122427386  |
| C92 | -10.210780451 | 5.941856907   | 5.003934562  |
| C93 | -11.324742000 | 5.611276131   | 5.991128814  |
| C94 | -10.113167793 | 4.829694366   | 3.926948766  |
| C95 | -9.104525338  | 5.171780108   | 2.854251154  |
| C96 | -9.458953087  | 6.020467054   | 1.793079781  |
| C97 | -7.779724244  | 4.709322615   | 2.917782952  |



|       |              |              |               |
|-------|--------------|--------------|---------------|
| C98   | -8.518800867 | 6.425240485  | 0.841856259   |
| C99   | -6.818559343 | 5.123887783  | 1.989029977   |
| C100  | -7.200642695 | 5.983435812  | 0.961532360   |
| C101  | 9.744278352  | 4.212781185  | -1.149894637  |
| C102  | 8.476858775  | 4.235081877  | -1.985123606  |
| C103  | 5.995178694  | 4.301184234  | -1.895181737  |
| C104  | 5.188363858  | 5.564173739  | -1.573803694  |
| C105  | 3.946666913  | 6.761122543  | 0.163591829   |
| C106  | 4.088697549  | 7.169683823  | 1.626287640   |
| C107  | 4.936448269  | 6.690655542  | 3.873984688   |
| C108  | 6.253038921  | 7.327074659  | 4.272317453   |
| C109  | 5.474513288  | 5.989034273  | -6.102789335  |
| C110  | 4.056633847  | 6.567893126  | -6.173034608  |
| C111  | 5.383034514  | 4.459325886  | -5.884237769  |
| C112  | 6.722438620  | 3.764629991  | -6.186020884  |
| C113  | 6.704064052  | 2.344122271  | -5.668907065  |
| C114  | 2.084201440  | 7.323698676  | -4.938965593  |
| C115  | 1.961906548  | 8.450819211  | -3.933197147  |
| C116  | 1.006199301  | 6.219885321  | -4.815955617  |
| C117  | 1.298891240  | 5.277200160  | -3.680471730  |
| C118  | 0.941684727  | 5.604772689  | -2.362520986  |
| C119  | 2.046395480  | 4.106909393  | -3.908922892  |
| C120  | 1.376936694  | 4.808942330  | -1.297424674  |
| C121  | 2.478381816  | 3.312974802  | -2.841349504  |
| C122  | 2.166167050  | 3.678494031  | -1.528723070  |
| C123  | 10.854699792 | -1.693346626 | 1.209008590   |
| C124  | 11.066702690 | -2.837276301 | 2.216299491   |
| C125  | 10.060663084 | -2.132984876 | -0.031954761  |
| C126  | 9.630714724  | -1.032455760 | -0.952471149  |
| C127  | 10.436446590 | -0.283477467 | -1.785341382  |
| C128  | 8.316689837  | 0.248929425  | -2.141253157  |
| C129  | 11.592910566 | -5.174704509 | 2.646697948   |
| C130  | 12.664512857 | -4.855107491 | 3.664987916   |
| C131  | 4.271822182  | -3.936317554 | -3.878584849  |
| C132  | 4.883296645  | -4.305794180 | -2.555314222  |
| C133  | 6.287962979  | -3.620922767 | -2.309422021  |
| C134  | 7.272439240  | -4.018092430 | -3.449647750  |
| C135  | 8.715596908  | -3.560973432 | -3.176193291  |
| C136  | 9.722713053  | -4.144127866 | -4.126892345  |
| C137  | 6.856812133  | -4.233693455 | -0.995070974  |
| C138  | 3.906946340  | 0.526130463  | 1.880907573   |
| Fe139 | 5.563966135  | 1.067102844  | 0.920478544   |
| Fe140 | 1.822176138  | 0.499827878  | 1.733653023   |
| Fe141 | 3.741639573  | 0.221895414  | 3.883979965   |
| Fe142 | 3.956649578  | 2.385905610  | 2.452785730   |
| Fe143 | 2.003395360  | 2.221434461  | 4.273848063   |
| Fe144 | 5.004400656  | -1.119201246 | 2.131976666   |
| Fe145 | 3.600965071  | -0.559053738 | 0.055679705   |
| H146  | 0.166697368  | -2.677413575 | -9.155523774  |
| H147  | 0.277395070  | -1.068870912 | -8.907806296  |
| H148  | -3.834818879 | -0.966416733 | -10.100429603 |
| H149  | -1.503208234 | -0.612445322 | -10.437714197 |
| H150  | -1.570112769 | -2.326440805 | -10.833026239 |
| H151  | -4.486180476 | -0.975775101 | -7.356024521  |
| H152  | -4.608387942 | -3.739485745 | -9.615807681  |
| H153  | -5.646102464 | -1.105553742 | -8.700629142  |
| H154  | -5.156157006 | -5.961434261 | -9.210162712  |
| H155  | -2.737598551 | -4.657457826 | -7.989887222  |
| H156  | -6.201285682 | -5.439615817 | -7.868447338  |
| H157  | -1.994033516 | -3.186125489 | -3.086542550  |
| H158  | -2.544355376 | -3.310024777 | -5.908244834  |
| H159  | -0.950884238 | -5.489126988 | -6.745608471  |
| H160  | -6.572024008 | -4.090633482 | -2.320303950  |
| H161  | -5.078389052 | -3.963530356 | -4.822973236  |
| H162  | -1.933689229 | -6.873301489 | -6.206112776  |
| H163  | -3.014957010 | -2.065846453 | -4.019237104  |
| H164  | -5.235462092 | -6.668432242 | -4.509317767  |
| H165  | -7.092095428 | -4.679770395 | -3.919232052  |
| H166  | -0.223867544 | -5.304275258 | -1.746956456  |
| H167  | 0.193790302  | -3.613356093 | -1.381753738  |
| H168  | 0.779069747  | -4.909889847 | -0.322118752  |
| H169  | -2.163774560 | -4.105705490 | -0.715888916  |
| H170  | -5.437567171 | -8.946935742 | -4.272527769  |

|      |               |              |              |
|------|---------------|--------------|--------------|
| H171 | -4.727503765  | -2.711037896 | 0.888042761  |
| H172 | -6.079413306  | -6.951043070 | 0.337843227  |
| H173 | -8.001210036  | -5.084814562 | 2.524569678  |
| H174 | -0.938465627  | -2.391127158 | 0.533615844  |
| H175 | -0.265260489  | -3.582983356 | 1.644518304  |
| H176 | 1.610509746   | -5.200939684 | 8.763405954  |
| H177 | -6.327979815  | -2.004737029 | 1.218643118  |
| H178 | -8.174545081  | -3.347183721 | 2.178769330  |
| H179 | -5.252933675  | -2.437830836 | 2.570231263  |
| H180 | -7.194852579  | -3.885718600 | 3.563146778  |
| H181 | -6.550470674  | -4.420395806 | 0.604324402  |
| H182 | -4.808423477  | -4.880059114 | 3.082510339  |
| H183 | -4.206025740  | -4.965285707 | 0.220711688  |
| H184 | -2.015414622  | -3.240785539 | 1.655042367  |
| H185 | -1.823939463  | 1.718534258  | 4.083666653  |
| H186 | -3.474976890  | 1.032239745  | 4.116388588  |
| H187 | -2.814921351  | 0.559379442  | 6.134165646  |
| H188 | -3.717811306  | -1.898692269 | 6.509790670  |
| H189 | -0.567058631  | -0.284206951 | 6.713988843  |
| H190 | 1.564388419   | -1.538718161 | 6.789108740  |
| H191 | -0.619667112  | -5.262702103 | 6.690931219  |
| H192 | -2.830807403  | -6.501773288 | -1.187305103 |
| H193 | -1.015028791  | -8.645558337 | -2.731415035 |
| H194 | -1.973066589  | -9.726801534 | -1.694889882 |
| H195 | -3.005638262  | -7.452612187 | -3.301076573 |
| H196 | -6.333720162  | -8.723741978 | -2.750810681 |
| H197 | -2.755015648  | -4.003400898 | 6.581409623  |
| H198 | -0.890144728  | -6.250741088 | 1.048684936  |
| H199 | -7.863705388  | -8.492960517 | 1.861202031  |
| H200 | -6.886597043  | -9.095037420 | 0.495614971  |
| H201 | -4.955464773  | -9.318657293 | 2.429977242  |
| H202 | 8.282407498   | -9.897027732 | 4.857092920  |
| H203 | 4.445528828   | 0.361175808  | -5.550057207 |
| H204 | 5.064644269   | -5.537343662 | -4.609845697 |
| H205 | 6.886643516   | 3.740568909  | -7.273358465 |
| H206 | 7.548991321   | 4.323008900  | -5.724696830 |
| H207 | 4.602574379   | 4.028837407  | -6.530264538 |
| H208 | 2.902289973   | 9.033791585  | -3.786901908 |
| H209 | 5.878129741   | 6.157103113  | -7.112440248 |
| H210 | 0.356514801   | 1.518675157  | -4.233437588 |
| H211 | 0.835927068   | -0.933783120 | -5.997840955 |
| H212 | 3.936093542   | 6.635746132  | -4.100433221 |
| H213 | 1.926420731   | 7.819799847  | -5.917607778 |
| H214 | 6.076654840   | 6.535806696  | -4.190718611 |
| H215 | 3.629267493   | -0.954420204 | -4.711711738 |
| H216 | 5.073557879   | 4.270059507  | -4.844386724 |
| H217 | 7.298086500   | 6.469814466  | -5.294531673 |
| H218 | -0.747149756  | 1.786349172  | -7.716411464 |
| H219 | -0.603512187  | 0.058797022  | -3.949521479 |
| H220 | 7.741357158   | 2.966227588  | -4.117083399 |
| H221 | 1.408104227   | -0.975491658 | -4.336501470 |
| H222 | -5.494130297  | -0.072166420 | -0.443574845 |
| H223 | -2.718866042  | -0.060893987 | -1.048966854 |
| H224 | -7.476804176  | -0.729126137 | -4.783297307 |
| H225 | -5.006651411  | 0.908859919  | -5.165742786 |
| H226 | -7.653706800  | 2.135455768  | -2.131190282 |
| H227 | -12.220935299 | 3.758012285  | -0.048796849 |
| H228 | -10.197781525 | 0.575651096  | -1.065593307 |
| H229 | -10.151017114 | 2.775203194  | -2.727028628 |
| H230 | -9.073533742  | 3.188915975  | 0.130615659  |
| H231 | -11.875110142 | 7.498798685  | -2.006892409 |
| H232 | -5.105952094  | 2.140790546  | 0.608174339  |
| H233 | -5.392005356  | 2.973700163  | -0.922621120 |
| H234 | -13.183467531 | 6.105266051  | -0.310839332 |
| H235 | -8.880687708  | 3.945708164  | -2.365520384 |
| H236 | -5.129678568  | 1.193446643  | -2.940943973 |
| H237 | -5.836761089  | -1.378807489 | -4.727850295 |
| H238 | -6.961316726  | 3.465981716  | -6.496909362 |
| H239 | -0.647799550  | 3.641916350  | -0.948383393 |
| H240 | -6.238604301  | 2.442992772  | -7.753732619 |
| H241 | 2.705027344   | -3.510256135 | 10.043127981 |
| H242 | 1.839147734   | -2.677117678 | 8.935134391  |
| H243 | -1.520011960  | 4.017274499  | 4.957324747  |

|      |               |               |              |
|------|---------------|---------------|--------------|
| H244 | -3.773894444  | 3.197599713   | 3.305129814  |
| H245 | -3.539781804  | 4.212261191   | 6.693529416  |
| H246 | -3.170204467  | 4.171918299   | -0.620545446 |
| H247 | -3.722460527  | 5.920277324   | -1.662180658 |
| H248 | -4.729106275  | 5.841442454   | -0.434468518 |
| H249 | -1.860473407  | 5.198205491   | -3.824945311 |
| H250 | -2.789190611  | 5.730738652   | -5.259083507 |
| H251 | -5.599695450  | 8.552032373   | 7.169668829  |
| H252 | -7.191879141  | 9.310991775   | 6.899589463  |
| H253 | -4.286457902  | 8.080814751   | 5.310570158  |
| H254 | -4.956753628  | 8.064606483   | 3.691227575  |
| H255 | -3.314056848  | 10.687249923  | 2.102696454  |
| H256 | -0.558049695  | 7.830330019   | 0.052818634  |
| H257 | -8.816192281  | 7.074589158   | 0.014176275  |
| H258 | -7.468589732  | 4.013253858   | 3.701624289  |
| H259 | -5.012278245  | 7.815324416   | 0.977372216  |
| H260 | 0.212848561   | 5.438120796   | 3.441769198  |
| H261 | -0.368304219  | 5.862649303   | 5.768361854  |
| H262 | -1.210124422  | 5.566366353   | 1.377766370  |
| H263 | -4.121882388  | 2.614807616   | -6.679194753 |
| H264 | -0.603878683  | 8.036515602   | 8.116604067  |
| H265 | -1.588854293  | 3.368778657   | -5.832860957 |
| H266 | 0.378349114   | 7.197777379   | 3.454566279  |
| H267 | -5.779575352  | 4.805910851   | 2.092220323  |
| H268 | -4.660572687  | 5.591539892   | -3.668194149 |
| H269 | -2.036632854  | 7.074281311   | 8.542553984  |
| H270 | -1.758048127  | 10.224278032  | 1.515573581  |
| H271 | -5.147823312  | 9.505998581   | 1.285823162  |
| H272 | 0.594436586   | 1.911674536   | -6.723099877 |
| H273 | -1.380754551  | 0.088694511   | -6.311201711 |
| H274 | -10.487448390 | 6.379133792   | 1.703470580  |
| H275 | -3.429486282  | 3.285242769   | -3.516545087 |
| H276 | -2.061280356  | 7.455375731   | 3.912674906  |
| H277 | -0.653240340  | 8.546723297   | 1.661813636  |
| H278 | 0.441903095   | 6.151930834   | 1.236981786  |
| H279 | -2.930445480  | 7.016836943   | 0.400176689  |
| H280 | -6.052179013  | 2.910365929   | 7.296862169  |
| H281 | -5.697444742  | 6.024704483   | 6.177611752  |
| H282 | -7.391157133  | 7.254350441   | 8.213135308  |
| H283 | -4.903780427  | 3.659101142   | 8.427308669  |
| H284 | -8.152113914  | 5.496789995   | 5.407797054  |
| H285 | 9.574970207   | 4.729177634   | -0.194842781 |
| H286 | 9.924574822   | 3.145140294   | -0.905858381 |
| H287 | 10.266352222  | -0.937217176  | 1.749457042  |
| H288 | 11.721956806  | 4.637972016   | -1.404235603 |
| H289 | 10.899970784  | 4.452092742   | -2.809663844 |
| H290 | 1.123233282   | 1.964646946   | 7.367866604  |
| H291 | -1.082746964  | 2.441772051   | 9.474394421  |
| H292 | 0.701998182   | 6.113149935   | 8.156516116  |
| H293 | -0.619705738  | 2.207195447   | 7.017733131  |
| H294 | -0.101615748  | 3.321537074   | 10.442389880 |
| H295 | 4.777873785   | 5.772659104   | 4.461583259  |
| H296 | 1.217705488   | 4.056711051   | 8.630646144  |
| H297 | 4.021353298   | -8.892100905  | 0.844650503  |
| H298 | 6.995051190   | -8.155255805  | 1.011141618  |
| H299 | 5.224782565   | 5.502527228   | 2.136731197  |
| H300 | 1.099259355   | -3.329659589  | 4.229837794  |
| H301 | 4.207672368   | 7.635192834   | -0.447825989 |
| H302 | 3.065198231   | 2.409820579   | -3.027225365 |
| H303 | 2.872624557   | 6.574598245   | -0.000426964 |
| H304 | 2.454373719   | -6.796983800  | 1.480840810  |
| H305 | 4.843991418   | 4.780134227   | 0.277150926  |
| H306 | 3.559661508   | -5.746082927  | 0.589953582  |
| H307 | 4.870433135   | -7.660892729  | -0.115279674 |
| H308 | 5.441975672   | -6.452991991  | 2.090419037  |
| H309 | 4.357547580   | -7.580754477  | 2.923506930  |
| H310 | 0.979520457   | 5.675180646   | -5.770926482 |
| H311 | 5.684858818   | -10.579885022 | -0.173037767 |
| H312 | 7.231141984   | -10.561446889 | -2.830211030 |
| H313 | 2.511672296   | 3.090944681   | -0.676453722 |
| H314 | 6.623003249   | -12.770557931 | -1.025803933 |
| H315 | 5.985818776   | -12.413866813 | -2.490741273 |
| H316 | 3.902845351   | -4.407547890  | 2.550634123  |

|       |               |               |              |
|-------|---------------|---------------|--------------|
| H317  | 1.119208575   | 5.054214378   | -0.266385339 |
| H318  | 2.295116756   | 3.814867671   | -4.932563127 |
| H319  | 10.827256131  | -6.280003446  | -0.699622851 |
| H320  | 10.678550420  | -2.837961229  | -0.616671917 |
| H321  | 8.449981635   | -6.133412626  | -0.163844776 |
| H322  | 11.387893928  | -5.621398767  | -1.977769747 |
| H323  | 6.863583039   | 7.721383507   | 3.422425618  |
| H324  | 6.914769466   | -4.079864441  | 1.647109485  |
| H325  | 4.991072746   | -5.396764147  | -2.461090580 |
| H326  | 7.349433916   | 4.276939632   | -0.274777970 |
| H327  | 7.255060051   | -5.114649406  | -3.552531489 |
| H328  | 9.864081073   | 1.162260369   | -3.259705900 |
| H329  | 7.448111876   | 0.719883787   | -2.584482353 |
| H330  | 8.389641984   | -11.504975201 | -1.882047960 |
| H331  | 2.615852965   | -2.846730341  | 3.528457609  |
| H332  | 7.884948413   | -5.883659715  | 2.889021726  |
| H333  | 6.583967122   | -3.653603777  | 3.102559509  |
| H334  | 7.559186605   | -8.236831854  | 3.133842403  |
| H335  | 1.153579075   | -6.648760190  | 3.085616986  |
| H336  | 10.191424309  | -4.236105112  | -5.956338509 |
| H337  | 8.761409924   | -2.463981875  | -3.236927903 |
| H338  | 9.032021665   | -3.857066016  | -2.170434088 |
| H339  | 6.921475749   | -3.573945941  | -4.392720433 |
| H340  | 5.470607319   | 3.403274073   | -1.530765792 |
| H341  | 0.348296624   | 6.503526334   | -2.176765250 |
| H342  | 0.038245280   | 6.727374876   | -4.683738883 |
| H343  | 4.220736600   | -3.937259603  | -1.761391871 |
| H344  | 8.813258091   | -6.694720569  | 1.941954430  |
| H345  | 8.967337322   | -7.593830138  | -0.126930604 |
| H346  | 0.079824727   | -5.377136805  | 3.540228074  |
| H347  | 11.512208590  | -0.273316667  | -1.918941639 |
| H348  | 9.168931147   | -2.684166740  | 0.290803799  |
| H349  | 6.112513058   | 4.242890375   | -2.979250454 |
| H350  | 4.134583399   | 7.401545369   | 4.132371597  |
| H351  | 1.857989908   | -5.217295913  | 6.326422013  |
| H352  | 2.744073563   | -3.672053721  | 6.360865504  |
| H353  | 12.600024710  | -0.731328550  | 1.689033662  |
| H354  | 12.768090365  | -1.789407293  | 0.454034572  |
| H355  | 11.951222259  | -6.033222371  | 2.056919633  |
| H356  | 11.360930972  | -4.278809243  | 0.728037379  |
| H357  | 13.410217127  | -4.090516812  | 3.334789712  |
| H358  | 10.666595684  | -5.487669798  | 3.154308840  |
| H359  | 4.586493914   | -4.731450804  | 8.124235090  |
| H360  | -10.988057238 | 5.135536853   | 6.941985407  |
| H361  | 6.733782455   | -10.742071223 | 4.583872576  |
| H362  | 5.681893229   | -8.363143968  | 5.460619476  |
| H363  | -10.478598052 | 6.894729558   | 4.516947036  |
| H364  | -9.844162716  | 3.879631523   | 4.413830262  |
| H365  | -11.114548354 | 4.706290051   | 3.489661383  |
| H366  | 3.141317131   | -1.423186903  | -1.094214326 |
| H367  | -6.645944250  | 6.916593127   | -0.657449534 |
| H368  | 1.930642231   | -1.041429828  | 1.624586533  |
| H369  | 0.995829148   | -0.619190491  | -0.766710799 |
| H370  | -0.426466711  | 1.151094313   | -1.153410399 |
| Mo371 | 6.167780783   | -1.357963346  | -0.310518733 |
| N372  | 0.035077698   | -1.770740067  | -9.610827958 |
| N373  | -3.675160122  | -1.485638463  | -9.240733261 |
| N374  | -4.937178506  | -3.961487733  | -8.679530985 |
| N375  | -2.937112822  | -5.435102165  | -7.362792710 |
| N376  | -2.535341165  | -3.822657891  | -5.024714007 |
| N377  | -5.092254297  | -4.117828160  | -3.811827273 |
| N378  | -5.494521658  | -6.990585672  | -3.573718652 |
| N379  | -3.070435958  | -8.237950863  | -2.646968079 |
| N380  | -2.105445486  | -6.755837763  | -0.520335766 |
| N381  | -4.078606679  | -5.292901133  | 1.179298532  |
| N382  | -6.180231959  | -7.314858377  | 1.287961825  |
| N383  | 6.295201309   | -11.998929873 | -1.610817206 |
| N384  | 6.373397600   | -9.833953363  | -0.026405744 |
| N385  | 3.173212112   | -5.126366029  | 2.541983632  |
| N386  | 0.978457631   | -5.652103002  | 3.154370646  |
| N387  | 1.836996196   | -3.527049646  | 3.557498512  |
| N388  | 7.039552669   | -9.119734214  | 3.332959036  |
| N389  | -0.439673327  | 1.973699260   | -6.760521377 |

|      |               |               |              |
|------|---------------|---------------|--------------|
| N390 | 3.575048223   | -0.093057755  | -5.258251144 |
| N391 | -2.348107863  | 2.970898714   | -5.253884135 |
| N392 | -4.938692722  | 3.007400836   | -6.216936973 |
| N393 | -6.001490528  | 0.662741434   | -5.211515218 |
| N394 | -5.829195834  | 0.702591054   | -2.384990394 |
| N395 | -2.769460241  | 3.202845657   | -0.741912992 |
| N396 | -1.350292526  | 1.612688510   | -1.087282981 |
| N397 | -7.998341006  | 1.942252408   | -1.193042716 |
| N398 | -10.644833449 | 5.741022052   | -2.214531880 |
| N399 | -12.377746585 | 5.765662800   | -0.829285046 |
| N400 | 2.637621002   | -3.309627097  | 9.042043812  |
| N401 | -0.114109383  | 2.757660668   | 9.587775385  |
| N402 | -0.303979651  | 5.977140966   | 8.107474536  |
| N403 | -1.093590867  | 6.542211775   | 5.494539042  |
| N404 | -2.464994836  | 7.793317171   | 0.900807847  |
| N405 | -2.696426513  | 9.948126556   | 1.782932068  |
| N406 | -4.575919239  | 8.667029093   | 1.335058227  |
| N407 | -2.435958596  | 4.234470134   | 4.518438688  |
| N408 | -4.498161041  | 3.990324362   | 6.405176740  |
| N409 | -6.445674415  | 5.989078659   | 6.870810719  |
| N410 | -5.107510002  | 8.139829150   | 4.695673963  |
| N411 | -8.938515705  | 6.074348992   | 5.694320189  |
| N412 | 10.841612606  | 4.862977756   | -1.873117022 |
| N413 | 7.324209820   | 4.353408485   | -1.297329131 |
| N414 | 4.731839362   | 5.635223926   | -0.307195010 |
| N415 | 4.846841778   | 6.403070134   | 2.453436508  |
| N416 | 6.320395349   | 6.739368467   | -5.168030441 |
| N417 | 3.451633229   | 6.838049364   | -4.981340607 |
| N418 | 12.142607851  | -1.074232989  | 0.839270729  |
| N419 | 8.302054965   | -0.677776565  | -1.186094604 |
| N420 | 9.590740150   | 0.514772400   | -2.525448247 |
| N421 | 11.370548981  | -4.071621858  | 1.726339449  |
| N422 | -1.112421920  | 0.333092799   | 1.771124976  |
| N423 | 0.018713004   | 0.387694481   | 1.752682316  |
| O424 | -2.132368748  | -2.400384621  | -7.836835331 |
| O425 | -5.497800880  | -3.153086524  | -6.623388404 |
| O426 | -4.567570619  | -6.740828910  | -6.438417099 |
| O427 | -2.059663091  | -5.770490371  | -3.944564678 |
| O428 | -4.085809136  | -3.749616934  | -1.800681327 |
| O429 | -6.486004246  | -6.487802698  | -1.576165756 |
| O430 | -4.350510986  | -9.946543293  | -1.811105444 |
| O431 | -0.432583026  | -8.281475353  | -0.107982414 |
| O432 | -2.616833601  | -6.011078259  | 2.780782081  |
| O433 | -6.061142404  | -6.970959693  | 3.529432295  |
| O434 | -6.560517990  | -10.432050667 | 3.019025997  |
| O435 | 8.446322951   | -9.161297454  | -0.801654726 |
| O436 | 5.544402774   | -10.681541792 | 2.552142965  |
| O437 | 6.928744635   | -9.055760164  | 6.918181233  |
| O438 | -3.105699565  | 0.931372221   | -4.521302426 |
| O439 | 2.328524854   | 1.521484624   | -6.267212702 |
| O440 | -5.658665468  | 4.293703767   | -4.464591028 |
| O441 | -3.751747065  | 5.898893206   | -3.411427415 |
| O442 | -8.054117589  | 1.125117627   | -6.140960661 |
| O443 | -7.100953491  | -1.189394544  | -2.263623670 |
| O444 | -7.582793319  | 0.814658618   | 0.753839202  |
| O445 | -11.110111676 | 1.583016660   | 0.454576725  |
| O446 | 3.715338995   | -6.575429723  | 8.236822837  |
| O447 | -2.945375827  | -1.311092351  | 6.602875328  |
| O448 | -2.019895468  | 4.478291867   | 8.123417373  |
| O449 | -2.655184310  | 8.054042633   | 6.247389603  |
| O450 | -3.551683877  | 5.629754804   | 3.082946685  |
| O451 | -5.727360065  | 2.773830419   | 4.898885189  |
| O452 | -2.677712494  | 1.517310131   | 5.987222684  |
| O453 | -7.227870951  | 4.872761065   | 8.706841576  |
| O454 | -9.569009600  | 7.886551955   | 6.927636524  |
| O455 | -7.299154876  | 8.675617699   | 4.343926344  |
| O456 | -12.505053439 | 5.810476569   | 5.754307435  |
| O457 | -6.211166558  | 6.425662879   | 0.066196063  |
| O458 | 8.538100077   | 4.115938819   | -3.235593562 |
| O459 | 4.995493107   | 6.456678361   | -2.429359304 |
| O460 | 3.486508652   | 8.188108530   | 2.004849436  |
| O461 | 6.634178727   | 7.413332244   | 5.428674437  |
| O462 | 3.479568321   | 6.737421043   | -7.260103581 |

|                       |                                     |              |               |               |
|-----------------------|-------------------------------------|--------------|---------------|---------------|
|                       | O463                                | 6.113897566  | 1.424687652   | -6.227183941  |
|                       | O464                                | 7.338834526  | 2.125219130   | -4.501188499  |
|                       | O465                                | 0.931262536  | 8.754256637   | -3.349112215  |
|                       | O466                                | 11.044937951 | -2.629643956  | 3.444019767   |
|                       | O467                                | 12.769229433 | -5.427488052  | 4.739757521   |
|                       | O468                                | 3.588972455  | -2.946973152  | -4.100289007  |
|                       | O469                                | 4.521359599  | -4.789372239  | -4.924706868  |
|                       | O470                                | 10.673062238 | -4.855966051  | -3.810318803  |
|                       | O471                                | 9.491314967  | -3.804631463  | -5.421107973  |
|                       | O472                                | 7.121283396  | -3.387295538  | -0.053323242  |
|                       | O473                                | 7.078033607  | -5.464387503  | -0.924195749  |
|                       | O474                                | 6.135249038  | -2.254001861  | -2.211764758  |
|                       | O475                                | 8.453260679  | -6.694908058  | 2.868697710   |
|                       | O476                                | 6.758699067  | -4.444373897  | 2.555069528   |
|                       | O477                                | -3.769978474 | 5.785465619   | -0.673836896  |
|                       | O478                                | 11.677727540 | -5.996313508  | -1.120606106  |
|                       | O479                                | 9.211237581  | -6.682943214  | 0.182128071   |
|                       | S480                                | 0.756025616  | 3.663920136   | 5.649762635   |
|                       | S481                                | 1.777970090  | 2.968185216   | 2.057324845   |
|                       | S482                                | 5.091087165  | 0.539373494   | -1.217566196  |
|                       | S483                                | 1.545264171  | 0.039511193   | 4.110132514   |
|                       | S484                                | 1.739257286  | 0.510847384   | -0.575371711  |
|                       | S485                                | 5.840788227  | 3.196000590   | 1.494967682   |
|                       | S486                                | 4.312441285  | -2.567557414  | 0.581853064   |
|                       | S487                                | 4.269215632  | 2.235517331   | 4.730926083   |
|                       | S488                                | 7.077139739  | -0.422816615  | 1.688725999   |
|                       | S489                                | 4.692622427  | -1.761011608  | 4.212924779   |
| D 35(2)<br>TS         | bm2cnx2b6x2hn2n2xd235th_1_53122.100 |              |               |               |
| Fe( 139) 0.549 -2.434 | C1                                  | -2.396397557 | -1.852190281  | -8.925641605  |
| Fe( 140) 0.352 -0.168 | C2                                  | -1.344792070 | -1.604288526  | -10.012047851 |
| Fe( 141) 0.544 -2.640 | C3                                  | -4.740798595 | -1.553779521  | -8.258457135  |
| Fe( 142) 0.567 2.767  | C4                                  | -5.077482216 | -2.965117590  | -7.781878478  |
| Fe( 143) 0.610 3.232  | C5                                  | -5.184587514 | -5.346571730  | -8.306185184  |
| Fe( 144) 0.510 2.168  | C6                                  | -4.198579886 | -5.901542901  | -7.273763430  |
| Fe( 145) 0.320 0.630  | C7                                  | -1.930763410 | -5.788842924  | -6.355956563  |
|                       | C8                                  | -2.176602380 | -5.126383115  | -4.997107358  |
|                       | C9                                  | -2.834964104 | -3.114973859  | -3.783971371  |
|                       | C10                                 | -4.053112812 | -3.680445058  | -3.037938866  |
|                       | C11                                 | -6.265077784 | -4.683323315  | -3.177916766  |
|                       | C12                                 | -6.063348429 | -6.123824832  | -2.684945477  |
|                       | C13                                 | -5.429545182 | -8.410643260  | -3.297609702  |
|                       | C14                                 | -4.219636040 | -8.930244628  | -2.514131362  |
|                       | C15                                 | -1.831223502 | -8.668710703  | -2.005562135  |
|                       | C16                                 | -1.393164842 | -7.881597644  | -0.767707904  |
|                       | C17                                 | -1.748973067 | -5.805402974  | 0.539685546   |
|                       | C18                                 | -2.842636049 | -5.698401031  | 1.615704375   |
|                       | C19                                 | -1.340502932 | -4.433241523  | -0.066404849  |
|                       | C20                                 | -1.151376459 | -3.350583379  | 0.999938029   |
|                       | C21                                 | -0.076237540 | -4.577477276  | -0.921890647  |
|                       | C22                                 | -5.204542043 | -5.192241585  | 2.127066554   |
|                       | C23                                 | -5.844171748 | -6.569177713  | 2.393440218   |
|                       | C24                                 | -6.230542135 | -4.139530464  | 1.644156194   |
|                       | C25                                 | -7.468797596 | -4.119679923  | 2.547062080   |
|                       | C26                                 | -5.590222070 | -2.745663082  | 1.580351775   |
|                       | C27                                 | -6.825674782 | -8.600267847  | 1.498570511   |
|                       | C28                                 | -6.040776686 | -9.506543688  | 2.428827320   |
|                       | C29                                 | 7.385704999  | -11.054856891 | -1.859504240  |
|                       | C30                                 | 7.452520822  | -9.931611764  | -0.824692010  |
|                       | C31                                 | 6.168662528  | -8.887504283  | 1.048267158   |
|                       | C32                                 | 6.213256889  | -9.654734526  | 2.383865247   |
|                       | C33                                 | 4.832349670  | -8.147307889  | 0.861600174   |
|                       | C34                                 | 4.555704127  | -7.103216462  | 1.946211059   |
|                       | C35                                 | 3.374692756  | -6.213301468  | 1.561086128   |
|                       | C36                                 | 1.979679168  | -4.782294188  | 3.071205463   |
|                       | C37                                 | 7.215290420  | -9.762650916  | 4.614132665   |
|                       | C38                                 | 6.573864484  | -9.010009332  | 5.761004585   |
|                       | C39                                 | -1.030083336 | 1.008624728   | -5.811286428  |
|                       | C40                                 | -2.268438141 | 1.614012287   | -5.127668289  |
|                       | C41                                 | -0.034499285 | 0.601883055   | -4.698015917  |
|                       | C42                                 | 1.148741093  | -0.286772618  | -5.135921453  |
|                       | C43                                 | 2.396365791  | 0.469962175   | -5.591320182  |
|                       | C44                                 | -3.328809046 | 3.744374746   | -4.514654051  |

|      |               |              |              |
|------|---------------|--------------|--------------|
| C45  | -4.750522883  | 3.717124623  | -5.095118960 |
| C46  | -2.859492547  | 5.195564057  | -4.291010122 |
| C47  | -6.273296076  | 2.622800336  | -6.675362046 |
| C48  | -6.870952186  | 1.390972966  | -5.977665181 |
| C49  | -6.462355028  | -0.511671817 | -4.469803730 |
| C50  | -6.495534068  | -0.376294812 | -2.946361015 |
| C51  | -5.821163881  | 0.847272822  | -0.932471787 |
| C52  | -7.239682748  | 1.156299615  | -0.390018837 |
| C53  | -4.964930430  | 2.043981062  | -0.491187459 |
| C54  | -3.498602911  | 2.005552079  | -0.778487482 |
| C55  | -2.590124058  | 0.998585608  | -0.997993487 |
| C56  | -1.467099322  | 2.915380812  | -0.949187591 |
| C57  | -9.228603653  | 2.576690344  | -0.774873791 |
| C58  | -10.245859925 | 1.494376605  | -0.420805862 |
| C59  | -9.736996058  | 3.448227014  | -1.947404393 |
| C60  | -10.728182560 | 4.519522854  | -1.600488357 |
| C61  | -11.792102839 | 4.519237713  | -0.719060742 |
| C62  | -11.637013193 | 6.479242978  | -1.742450224 |
| C63  | 2.366705085   | -4.546205187 | 8.307190543  |
| C64  | 3.652722157   | -5.346928390 | 8.220624555  |
| C65  | 1.923400349   | -4.258810396 | 6.848745027  |
| C66  | 0.620506676   | -3.498731934 | 6.767149667  |
| C67  | -0.615694263  | -4.168780907 | 6.701839021  |
| C68  | 0.605976664   | -2.091395345 | 6.771345604  |
| C69  | -1.822062527  | -3.463987063 | 6.640801838  |
| C70  | -0.590023809  | -1.374206202 | 6.724462930  |
| C71  | -1.804051092  | -2.062951872 | 6.656762485  |
| C72  | 0.226953623   | 3.603346528  | 8.438444087  |
| C73  | -0.804718199  | 4.714575536  | 8.208317128  |
| C74  | 0.346760153   | 2.718605595  | 7.187693755  |
| C75  | -1.167897634  | 7.126709651  | 7.891201288  |
| C76  | -1.705418067  | 7.274279270  | 6.466712015  |
| C77  | -1.531747272  | 6.515709065  | 4.120358765  |
| C78  | -2.585297670  | 5.415010718  | 3.864968014  |
| C79  | -0.296378346  | 6.392557090  | 3.209348856  |
| C80  | -0.528475134  | 6.389811411  | 1.695699347  |
| C81  | -0.998560876  | 7.708854716  | 1.057953958  |
| C82  | -3.225415718  | 8.803320285  | 1.286430920  |
| C83  | -3.391286675  | 3.166719541  | 4.352113490  |
| C84  | -4.648705347  | 3.318601786  | 5.227955578  |
| C85  | -2.792963928  | 1.775185245  | 4.624040285  |
| C86  | -5.447978832  | 3.808771760  | 7.483314053  |
| C87  | -6.446317101  | 4.932018590  | 7.741574609  |
| C88  | -7.250952239  | 7.170169020  | 7.125971528  |
| C89  | -8.686953156  | 7.070197786  | 6.570551908  |
| C90  | -6.550010188  | 8.454632375  | 6.635535494  |
| C91  | -6.350336548  | 8.461404707  | 5.124688281  |
| C92  | -10.197768370 | 5.940621068  | 5.001311791  |
| C93  | -11.306162044 | 5.607581726  | 5.992875823  |
| C94  | -10.108044017 | 4.830471191  | 3.921108583  |
| C95  | -9.099888811  | 5.168232510  | 2.846494021  |
| C96  | -9.448278529  | 6.028158966  | 1.792804381  |
| C97  | -7.779743336  | 4.691675356  | 2.905594446  |
| C98  | -8.507021357  | 6.426466594  | 0.840848753  |
| C99  | -6.817144533  | 5.097640639  | 1.974613394  |
| C100 | -7.194337657  | 5.967811325  | 0.953790174  |
| C101 | 9.744707752   | 4.220321452  | -1.158042980 |
| C102 | 8.473660437   | 4.244262383  | -1.988628661 |
| C103 | 5.993731958   | 4.301238687  | -1.892873902 |
| C104 | 5.179153793   | 5.558250901  | -1.569424013 |
| C105 | 3.933168094   | 6.746380382  | 0.170150231  |
| C106 | 4.074069413   | 7.158408320  | 1.632922607  |
| C107 | 4.930240697   | 6.687680698  | 3.878888125  |
| C108 | 6.245495495   | 7.326461860  | 4.270911593  |
| C109 | 5.476747627   | 5.995295666  | -6.097263019 |
| C110 | 4.060597841   | 6.575507754  | -6.171116555 |
| C111 | 5.385231404   | 4.467019854  | -5.880263279 |
| C112 | 6.723712104   | 3.771957562  | -6.188100366 |
| C113 | 6.707333259   | 2.349788845  | -5.673891993 |
| C114 | 2.076156747   | 7.305202469  | -4.947272024 |
| C115 | 1.938665522   | 8.434924176  | -3.946321670 |
| C116 | 1.000231669   | 6.198557704  | -4.834604994 |
| C117 | 1.280812041   | 5.268728876  | -3.686195796 |

|       |              |              |               |
|-------|--------------|--------------|---------------|
| C118  | 0.910114414  | 5.609268797  | -2.375164593  |
| C119  | 2.034088446  | 4.098561219  | -3.893334907  |
| C120  | 1.336341445  | 4.826869488  | -1.296878871  |
| C121  | 2.456761381  | 3.316988120  | -2.813435315  |
| C122  | 2.131109403  | 3.695687556  | -1.508166896  |
| C123  | 10.862015177 | -1.700536614 | 1.214103857   |
| C124  | 11.073335317 | -2.849166835 | 2.213805344   |
| C125  | 10.075256529 | -2.135175935 | -0.032739487  |
| C126  | 9.661758019  | -1.033984395 | -0.959679065  |
| C127  | 10.474961970 | -0.303329635 | -1.802599082  |
| C128  | 8.361520634  | 0.260611428  | -2.146686335  |
| C129  | 11.601623535 | -5.185222124 | 2.638668907   |
| C130  | 12.664177229 | -4.859781034 | 3.665784371   |
| C131  | 4.294895417  | -3.941557087 | -3.894970575  |
| C132  | 4.897944003  | -4.285508635 | -2.561599928  |
| C133  | 6.311220619  | -3.617800586 | -2.319451886  |
| C134  | 7.290477716  | -4.030172124 | -3.457316245  |
| C135  | 8.729659672  | -3.560099818 | -3.186418285  |
| C136  | 9.746541830  | -4.135155938 | -4.130623870  |
| C137  | 6.868191120  | -4.234795528 | -0.999845121  |
| C138  | 3.919313507  | 0.521625759  | 1.881041106   |
| Fe139 | 5.584630159  | 1.063491581  | 0.903558366   |
| Fe140 | 1.991201139  | 0.617880277  | 1.772146881   |
| Fe141 | 3.691644764  | 0.174465654  | 3.864426496   |
| Fe142 | 3.979590530  | 2.386375656  | 2.468496545   |
| Fe143 | 2.003026576  | 2.224197430  | 4.262505931   |
| Fe144 | 4.981161701  | -1.142093885 | 2.078483409   |
| Fe145 | 3.648204228  | -0.480889302 | -0.020841529  |
| H146  | 0.173864330  | -2.665419511 | -9.155889248  |
| H147  | 0.286820829  | -1.056153219 | -8.906965730  |
| H148  | -3.834033251 | -0.969894151 | -10.103774810 |
| H149  | -1.495864081 | -0.596234193 | -10.430177028 |
| H150  | -1.562897020 | -2.307174625 | -10.834911111 |
| H151  | -4.484726798 | -0.976897128 | -7.358629328  |
| H152  | -4.594323012 | -3.745018987 | -9.618525817  |
| H153  | -5.643403209 | -1.113694409 | -8.704199121  |
| H154  | -5.140070426 | -5.968624357 | -9.209762358  |
| H155  | -2.724965134 | -4.661716172 | -7.986074062  |
| H156  | -6.187908802 | -5.443218197 | -7.871160329  |
| H157  | -1.987257510 | -3.172931203 | -3.087771532  |
| H158  | -2.537178050 | -3.303157840 | -5.908208510  |
| H159  | -0.941774065 | -5.492938158 | -6.731275095  |
| H160  | -6.563107510 | -4.080146349 | -2.311530600  |
| H161  | -5.072954667 | -3.958176382 | -4.818410570  |
| H162  | -1.930755534 | -6.872912884 | -6.189352538  |
| H163  | -3.008254317 | -2.055759004 | -4.024872211  |
| H164  | -5.229054129 | -6.661967892 | -4.502590285  |
| H165  | -7.085679441 | -4.674936931 | -3.907965980  |
| H166  | -0.202639939 | -5.328641329 | -1.714068566  |
| H167  | 0.171312206  | -3.618831197 | -1.403194665  |
| H168  | 0.787710397  | -4.865612199 | -0.302193407  |
| H169  | -2.167553218 | -4.114116624 | -0.721334731  |
| H170  | -5.449150586 | -8.938785966 | -4.262124643  |
| H171  | -4.725769597 | -2.717706899 | 0.901970384   |
| H172  | -6.075017552 | -6.953999093 | 0.356843017   |
| H173  | -7.995429049 | -5.085390510 | 2.553688464   |
| H174  | -0.946837099 | -2.385768313 | 0.512727069   |
| H175  | -0.292787807 | -3.560542707 | 1.652895426   |
| H176  | 1.600917239  | -5.193838620 | 8.775817945   |
| H177  | -6.327288089 | -2.009892792 | 1.226167024   |
| H178  | -8.172633781 | -3.349178468 | 2.200835020   |
| H179  | -5.253785302 | -2.430397000 | 2.581844956   |
| H180  | -7.189060530 | -3.880965333 | 3.585983787   |
| H181  | -6.549139748 | -4.425557968 | 0.625221178   |
| H182  | -4.798985724 | -4.877752373 | 3.099710355   |
| H183  | -4.212475021 | -4.989988577 | 0.232030561   |
| H184  | -2.041883220 | -3.216844147 | 1.632361250   |
| H185  | -1.790481046 | 1.730217232  | 4.167140739   |
| H186  | -3.441485769 | 1.035297555  | 4.130138851   |
| H187  | -2.842933474 | 0.561848744  | 6.167037875   |
| H188  | -3.733966729 | -1.895793898 | 6.506130606   |
| H189  | -0.580723666 | -0.283759758 | 6.706820081   |
| H190  | 1.549600800  | -1.540705377 | 6.780073999   |



|      |               |              |              |
|------|---------------|--------------|--------------|
| H191 | -0.639634197  | -5.261830034 | 6.690836151  |
| H192 | -2.830788977  | -6.501092407 | -1.174959788 |
| H193 | -1.001514737  | -8.616388767 | -2.726406641 |
| H194 | -1.953504556  | -9.717257116 | -1.703685413 |
| H195 | -2.999675029  | -7.430445480 | -3.283522101 |
| H196 | -6.317334926  | -8.708380078 | -2.725307700 |
| H197 | -2.772362269  | -4.000678911 | 6.575249616  |
| H198 | -0.884735932  | -6.244366260 | 1.053983302  |
| H199 | -7.853869458  | -8.500359292 | 1.880743576  |
| H200 | -6.871311131  | -9.103863316 | 0.519773262  |
| H201 | -4.941506356  | -9.319902269 | 2.451119491  |
| H202 | 8.281591690   | -9.920416403 | 4.834566329  |
| H203 | 4.443873694   | 0.377731690  | -5.546876329 |
| H204 | 5.087673871   | -5.557766189 | -4.587396757 |
| H205 | 6.880013522   | 3.746032617  | -7.276381208 |
| H206 | 7.553765138   | 4.330710275  | -5.732896599 |
| H207 | 4.603602794   | 4.034721219  | -6.524175989 |
| H208 | 2.886373095   | 8.992554946  | -3.755455908 |
| H209 | 5.884121955   | 6.164051854  | -7.106057042 |
| H210 | 0.344170458   | 1.518814834  | -4.217621566 |
| H211 | 0.842703905   | -0.940800721 | -5.971037315 |
| H212 | 3.920468108   | 6.609348212  | -4.096407673 |
| H213 | 1.926118522   | 7.800258810  | -5.928392416 |
| H214 | 6.071768967   | 6.541639439  | -4.183930226 |
| H215 | 3.637568139   | -0.934368530 | -4.693116224 |
| H216 | 5.078675028   | 4.276734856  | -4.839696354 |
| H217 | 7.298529577   | 6.474705843  | -5.281185118 |
| H218 | -0.748900600  | 1.782947689  | -7.707663249 |
| H219 | -0.610415749  | 0.052189679  | -3.939116053 |
| H220 | 7.744046150   | 2.969159016  | -4.121771853 |
| H221 | 1.416765822   | -0.959378278 | -4.308592424 |
| H222 | -5.496210428  | -0.079817990 | -0.437505863 |
| H223 | -2.717956429  | -0.074991920 | -1.072222986 |
| H224 | -7.489820914  | -0.736597811 | -4.782829758 |
| H225 | -5.022441454  | 0.901849436  | -5.163118330 |
| H226 | -7.631300031  | 2.145727842  | -2.138045502 |
| H227 | -12.170904186 | 3.770965252  | -0.032952804 |
| H228 | -10.166580770 | 0.576267964  | -1.051493373 |
| H229 | -10.127510836 | 2.789635995  | -2.743617443 |
| H230 | -9.054173067  | 3.202220548  | 0.115085765  |
| H231 | -11.877905444 | 7.503347460  | -2.015306202 |
| H232 | -5.103072809  | 2.137955241  | 0.598984264  |
| H233 | -5.386093433  | 2.959750192  | -0.938130349 |
| H234 | -13.155270558 | 6.113139219  | -0.295392646 |
| H235 | -8.862233862  | 3.961717026  | -2.375594905 |
| H236 | -5.106243483  | 1.155253144  | -2.939009070 |
| H237 | -5.850675498  | -1.389138915 | -4.729019434 |
| H238 | -6.967928644  | 3.454956060  | -6.502912104 |
| H239 | -0.645197996  | 3.625098855  | -0.981362093 |
| H240 | -6.244112347  | 2.429289339  | -7.756155940 |
| H241 | 2.708162746   | -3.491211718 | 10.031154435 |
| H242 | 1.830887519   | -2.668168059 | 8.924854536  |
| H243 | -1.499866002  | 4.023402049  | 4.963991880  |
| H244 | -3.739462974  | 3.189822384  | 3.308873816  |
| H245 | -3.531406579  | 4.210000016  | 6.695787411  |
| H246 | -3.161817425  | 4.159588680  | -0.637803117 |
| H247 | -3.717992538  | 5.919818437  | -1.665483878 |
| H248 | -4.714597553  | 5.832124796  | -0.435063780 |
| H249 | -1.867821221  | 5.186053070  | -3.819030288 |
| H250 | -2.787432011  | 5.721281804  | -5.258273933 |
| H251 | -5.596065781  | 8.556916096  | 7.172929974  |
| H252 | -7.192735987  | 9.304884617  | 6.900254394  |
| H253 | -4.278031085  | 8.090007833  | 5.312291355  |
| H254 | -4.948331575  | 8.080661536  | 3.691857207  |
| H255 | -3.319324093  | 10.696917590 | 2.059902453  |
| H256 | -0.544458660  | 7.828303877  | 0.062235363  |
| H257 | -8.797600447  | 7.087075732  | 0.019991817  |
| H258 | -7.471999715  | 3.992237401  | 3.687673219  |
| H259 | -5.000509565  | 7.797317993  | 0.977811170  |
| H260 | 0.234711138   | 5.461282627  | 3.462889051  |
| H261 | -0.364918253  | 5.867099945  | 5.788645907  |
| H262 | -1.206327439  | 5.571636214  | 1.405260435  |
| H263 | -4.128110944  | 2.604459905  | -6.676984542 |

|      |               |               |              |
|------|---------------|---------------|--------------|
| H264 | -0.612794749  | 8.040982848   | 8.140909512  |
| H265 | -1.599372454  | 3.359377738   | -5.831308724 |
| H266 | 0.383738486   | 7.222061104   | 3.465989057  |
| H267 | -5.781016465  | 4.768653887   | 2.074153652  |
| H268 | -4.666153714  | 5.591112153   | -3.677806155 |
| H269 | -2.046643013  | 7.078608278   | 8.550291123  |
| H270 | -1.760906930  | 10.236632798  | 1.470350835  |
| H271 | -5.146798765  | 9.494741064   | 1.241628153  |
| H272 | 0.588137952   | 1.910720711   | -6.710204990 |
| H273 | -1.383159119  | 0.080656538   | -6.299123767 |
| H274 | -10.471125735 | 6.401488274   | 1.710890869  |
| H275 | -3.447840992  | 3.279031035   | -3.520830187 |
| H276 | -2.053603058  | 7.463201346   | 3.931659481  |
| H277 | -0.652395544  | 8.553394643   | 1.667846909  |
| H278 | 0.446433167   | 6.148571601   | 1.253247674  |
| H279 | -2.918227292  | 7.006702934   | 0.402801320  |
| H280 | -6.041770081  | 2.903602848   | 7.288316372  |
| H281 | -5.681559737  | 6.021385281   | 6.183708965  |
| H282 | -7.380152844  | 7.248148865   | 8.215386260  |
| H283 | -4.898005737  | 3.653763267   | 8.421960617  |
| H284 | -8.133969207  | 5.501101263   | 5.388350952  |
| H285 | 9.576755811   | 4.725224019   | -0.195881915 |
| H286 | 9.932605914   | 3.150460661   | -0.928558303 |
| H287 | 10.270818151  | -0.948295463  | 1.756516574  |
| H288 | 11.718947085  | 4.659719589   | -1.414993761 |
| H289 | 10.892944982  | 4.482526453   | -2.818316407 |
| H290 | 1.131698494   | 1.974479695   | 7.374390034  |
| H291 | -1.102509160  | 2.444860617   | 9.462397096  |
| H292 | 0.695590648   | 6.121473867   | 8.184590069  |
| H293 | -0.609956611  | 2.204879026   | 7.019734181  |
| H294 | -0.121789052  | 3.312259140   | 10.441901286 |
| H295 | 4.772005803   | 5.772571127   | 4.470301063  |
| H296 | 1.209124237   | 4.056939676   | 8.645496612  |
| H297 | 4.016177928   | -8.888255468  | 0.825263716  |
| H298 | 6.992038957   | -8.164755793  | 1.002095734  |
| H299 | 5.224243203   | 5.498771165   | 2.140755252  |
| H300 | 1.066790298   | -3.345812672  | 4.201354008  |
| H301 | 4.179318520   | 7.624268884   | -0.441814335 |
| H302 | 3.049278642   | 2.414711582   | -2.981684567 |
| H303 | 2.861624144   | 6.544419150   | 0.010862181  |
| H304 | 2.453332065   | -6.799582279  | 1.458199547  |
| H305 | 4.853864848   | 4.775559676   | 0.286705172  |
| H306 | 3.565758130   | -5.746188961  | 0.580240757  |
| H307 | 4.874899509   | -7.654405758  | -0.123464887 |
| H308 | 5.436838321   | -6.459994838  | 2.089266662  |
| H309 | 4.347203662   | -7.589549300  | 2.912602407  |
| H310 | 0.992535517   | 5.646662194   | -5.785652760 |
| H311 | 5.675139858   | -10.584915113 | -0.182866118 |
| H312 | 7.224127621   | -10.565080956 | -2.831562428 |
| H313 | 2.471475156   | 3.120593305   | -0.646100360 |
| H314 | 6.630664546   | -12.779645392 | -1.027015251 |
| H315 | 5.995922277   | -12.432507558 | -2.495630547 |
| H316 | 3.885205389   | -4.410971171  | 2.553701776  |
| H317 | 1.063753573   | 5.086646253   | -0.272772753 |
| H318 | 2.296300119   | 3.797673791   | -4.910400406 |
| H319 | 10.830211294  | -6.290698373  | -0.708710731 |
| H320 | 10.693090389  | -2.847447013  | -0.609371162 |
| H321 | 8.454005932   | -6.142349084  | -0.173701064 |
| H322 | 11.400842864  | -5.616778068  | -1.976844247 |
| H323 | 6.831609425   | 7.760457215   | 3.424388118  |
| H324 | 6.918114503   | -4.087006544  | 1.642501804  |
| H325 | 4.989962443   | -5.374989636  | -2.441262763 |
| H326 | 7.350035428   | 4.282020568   | -0.274121334 |
| H327 | 7.276954555   | -5.128109402  | -3.548289657 |
| H328 | 9.914626053   | 1.141294521   | -3.282591549 |
| H329 | 7.496390027   | 0.738875931   | -2.587917135 |
| H330 | 8.391783527   | -11.506214280 | -1.894766611 |
| H331 | 2.594325172   | -2.864067562  | 3.521724386  |
| H332 | 7.887228766   | -5.896258685  | 2.883197637  |
| H333 | 6.560201338   | -3.673941398  | 3.098391716  |
| H334 | 7.556046536   | -8.243764676  | 3.126998707  |
| H335 | 1.140354747   | -6.663091592  | 3.062019590  |
| H336 | 10.207775288  | -4.248829733  | -5.962114841 |

|       |               |               |              |
|-------|---------------|---------------|--------------|
| H337  | 8.762855692   | -2.462478450  | -3.253518611 |
| H338  | 9.046639784   | -3.843268186  | -2.176736740 |
| H339  | 6.938562485   | -3.594898699  | -4.404366537 |
| H340  | 5.476381560   | 3.398338886   | -1.530957994 |
| H341  | 0.312469421   | 6.507844168   | -2.204683756 |
| H342  | 0.027747822   | 6.702380206   | -4.723212375 |
| H343  | 4.238362018   | -3.888591197  | -1.779317082 |
| H344  | 8.813986719   | -6.706119307  | 1.933323248  |
| H345  | 8.971491671   | -7.605284521  | -0.129372930 |
| H346  | 0.051723524   | -5.396697219  | 3.489674873  |
| H347  | 11.549958076  | -0.309368504  | -1.942915641 |
| H348  | 9.175368403   | -2.676982862  | 0.283881789  |
| H349  | 6.111903064   | 4.243288411   | -2.976713366 |
| H350  | 4.127498914   | 7.400257593   | 4.133817476  |
| H351  | 1.827491354   | -5.227906044  | 6.334697954  |
| H352  | 2.723558165   | -3.687408002  | 6.351145457  |
| H353  | 12.605712622  | -0.737779617  | 1.704933848  |
| H354  | 12.777989803  | -1.792160330  | 0.466439085  |
| H355  | 11.970861477  | -6.038297988  | 2.047136631  |
| H356  | 11.361035858  | -4.288772562  | 0.721080016  |
| H357  | 13.412210117  | -4.096108564  | 3.339583364  |
| H358  | 10.675606710  | -5.505605987  | 3.142306572  |
| H359  | 4.569981145   | -4.723581668  | 8.086363651  |
| H360  | -10.964666352 | 5.118886199   | 6.935505038  |
| H361  | 6.726132672   | -10.751659830 | 4.570458990  |
| H362  | 5.722188641   | -8.345213824  | 5.475868285  |
| H363  | -10.465445915 | 6.894366326   | 4.516825657  |
| H364  | -9.845870626  | 3.876909372   | 4.405388337  |
| H365  | -11.111507607 | 4.714998293   | 3.486043213  |
| H366  | 3.176914730   | -1.312962611  | -1.188776437 |
| H367  | -6.636001193  | 6.901182923   | -0.665005357 |
| H368  | 1.758782579   | -0.889889303  | 1.661200373  |
| H369  | 0.978029723   | -0.661771481  | -0.616472992 |
| H370  | -0.415788735  | 1.133606822   | -1.162927132 |
| Mo371 | 6.188422780   | -1.339458549  | -0.332632312 |
| N372  | 0.043158976   | -1.757826469  | -9.610269278 |
| N373  | -3.670193889  | -1.485925112  | -9.242872213 |
| N374  | -4.920425442  | -3.967137212  | -8.681108448 |
| N375  | -2.925561218  | -5.438671290  | -7.358112244 |
| N376  | -2.531116625  | -3.815120724  | -5.024052329 |
| N377  | -5.087827441  | -4.104431264  | -3.806106187 |
| N378  | -5.482236005  | -6.981600593  | -3.564158264 |
| N379  | -3.060338628  | -8.225836366  | -2.640298803 |
| N380  | -2.108666816  | -6.755809233  | -0.504855182 |
| N381  | -4.077730210  | -5.297748461  | 1.196201224  |
| N382  | -6.174513254  | -7.316130725  | 1.307678057  |
| N383  | 6.299630893   | -12.012313131 | -1.616005041 |
| N384  | 6.366347779   | -9.841647669  | -0.034449894 |
| N385  | 3.156860110   | -5.130659225  | 2.529618367  |
| N386  | 0.957648835   | -5.666638193  | 3.116582671  |
| N387  | 1.801432625   | -3.533825734  | 3.522881718  |
| N388  | 7.031314687   | -9.123995195  | 3.326196328  |
| N389  | -0.446069882  | 1.971279362   | -6.750135383 |
| N390  | 3.576536621   | -0.078121854  | -5.247078135 |
| N391  | -2.357155240  | 2.962564639   | -5.249882804 |
| N392  | -4.947373673  | 2.994935096   | -6.217643403 |
| N393  | -6.015221113  | 0.652877876   | -5.212302323 |
| N394  | -5.819256795  | 0.680929350   | -2.385739089 |
| N395  | -2.764899297  | 3.188447127   | -0.760174893 |
| N396  | -1.347393370  | 1.594474040   | -1.106691255 |
| N397  | -7.983395857  | 1.950324954   | -1.203581479 |
| N398  | -10.642810933 | 5.749000726   | -2.234679729 |
| N399  | -12.354381578 | 5.774592464   | -0.822370617 |
| N400  | 2.630007442   | -3.299847524  | 9.029297879  |
| N401  | -0.132120144  | 2.753046101   | 9.584077677  |
| N402  | -0.309365835  | 5.982281402   | 8.124793626  |
| N403  | -1.086874032  | 6.549006636   | 5.510751410  |
| N404  | -2.457042677  | 7.788472131   | 0.899722211  |
| N405  | -2.700580990  | 9.961341131   | 1.734021942  |
| N406  | -4.572187983  | 8.659450114   | 1.319267228  |
| N407  | -2.418307753  | 4.239416167   | 4.528330855  |
| N408  | -4.490167281  | 3.995015871   | 6.403006122  |
| N409  | -6.432122546  | 5.987030373   | 6.874152821  |

|      |               |               |              |
|------|---------------|---------------|--------------|
| N410 | -5.099145842  | 8.150873673   | 4.697069498  |
| N411 | -8.922249607  | 6.069925045   | 5.687331907  |
| N412 | 10.835535707  | 4.884878030   | -1.878127760 |
| N413 | 7.323111531   | 4.357569840   | -1.296647175 |
| N414 | 4.729878929   | 5.628631078   | -0.300287627 |
| N415 | 4.838293789   | 6.396244691   | 2.458850775  |
| N416 | 6.320422760   | 6.746591305   | -5.159769244 |
| N417 | 3.443335487   | 6.820324441   | -4.979931602 |
| N418 | 12.151123619  | -1.078664630  | 0.852748532  |
| N419 | 8.337911484   | -0.659394672  | -1.185902660 |
| N420 | 9.636924110   | 0.502653518   | -2.542623297 |
| N421 | 11.377582479  | -4.081276430  | 1.719327090  |
| N422 | -1.553444987  | 0.137189516   | 1.939741440  |
| N423 | -0.523802632  | 0.542290113   | 1.810495100  |
| O424 | -2.124096132  | -2.391156735  | -7.836584195 |
| O425 | -5.490200526  | -3.160727112  | -6.626907114 |
| O426 | -4.558464195  | -6.743858299  | -6.435736988 |
| O427 | -2.064841500  | -5.759040202  | -3.934874348 |
| O428 | -4.078099915  | -3.726301433  | -1.797812854 |
| O429 | -6.458725486  | -6.473960486  | -1.559607786 |
| O430 | -4.325551522  | -9.965757194  | -1.843280151 |
| O431 | -0.426418317  | -8.271951345  | -0.098984736 |
| O432 | -2.593433542  | -5.961543767  | 2.802242235  |
| O433 | -6.051610130  | -6.975624192  | 3.548956390  |
| O434 | -6.548818097  | -10.425591029 | 3.053054148  |
| O435 | 8.449171131   | -9.179055175  | -0.792273724 |
| O436 | 5.536870160   | -10.686297131 | 2.543963532  |
| O437 | 6.934530176   | -9.121371295  | 6.922251746  |
| O438 | -3.109940482  | 0.924698689   | -4.509492986 |
| O439 | 2.320914765   | 1.525000718   | -6.262048760 |
| O440 | -5.666527380  | 4.304738581   | -4.482416851 |
| O441 | -3.757797758  | 5.895111693   | -3.415249780 |
| O442 | -8.065207190  | 1.116685738   | -6.144733023 |
| O443 | -7.137214057  | -1.178288110  | -2.264028038 |
| O444 | -7.590402076  | 0.810411250   | 0.740315335  |
| O445 | -11.103064653 | 1.608478267   | 0.437531852  |
| O446 | 3.707754076   | -6.567581683  | 8.259664651  |
| O447 | -2.960173980  | -1.308740886  | 6.591288280  |
| O448 | -2.024650954  | 4.483890646   | 8.117981259  |
| O449 | -2.649085726  | 8.064140703   | 6.256195593  |
| O450 | -3.538473553  | 5.632963162   | 3.095732834  |
| O451 | -5.716360807  | 2.795138371   | 4.880262500  |
| O452 | -2.721780257  | 1.523974200   | 6.029883506  |
| O453 | -7.234647446  | 4.852329260   | 8.692012674  |
| O454 | -9.566026115  | 7.860107328   | 6.943381809  |
| O455 | -7.293366533  | 8.673107670   | 4.345175799  |
| O456 | -12.487038064 | 5.815682147   | 5.766876652  |
| O457 | -6.204482666  | 6.403461964   | 0.056135673  |
| O458 | 8.530213736   | 4.130804790   | -3.239985369 |
| O459 | 4.971876305   | 6.446323343   | -2.426628023 |
| O460 | 3.464067977   | 8.171579946   | 2.014270510  |
| O461 | 6.646478445   | 7.386053202   | 5.422062515  |
| O462 | 3.495612595   | 6.769371398   | -7.260622558 |
| O463 | 6.116675995   | 1.432650920   | -6.235981663 |
| O464 | 7.343878201   | 2.127796565   | -4.507949980 |
| O465 | 0.887601354   | 8.769253432   | -3.417723102 |
| O466 | 11.055841292  | -2.646710383  | 3.442500010  |
| O467 | 12.765451767  | -5.432154407  | 4.741186864  |
| O468 | 3.614557643   | -2.955605658  | -4.139489496 |
| O469 | 4.546861119   | -4.816674152  | -4.922194703 |
| O470 | 10.720919077  | -4.808259841  | -3.804169899 |
| O471 | 9.497263124   | -3.829940099  | -5.430802569 |
| O472 | 7.120676867   | -3.392094395  | -0.053188720 |
| O473 | 7.086820908   | -5.467331430  | -0.931911296 |
| O474 | 6.186559652   | -2.247768713  | -2.228131939 |
| O475 | 8.455970449   | -6.706572007  | 2.860837432  |
| O476 | 6.758848780   | -4.456817389  | 2.548156742  |
| O477 | -3.757185224  | 5.779647659   | -0.677683762 |
| O478 | 11.683447856  | -6.007053529  | -1.124115223 |
| O479 | 9.214371016   | -6.692531709  | 0.175052247  |
| S480 | 0.762225103   | 3.667944938   | 5.649912791  |
| S481 | 1.829649929   | 3.028946353   | 2.053945101  |
| S482 | 5.147536402   | 0.592349843   | -1.247167747 |

|                        |                               |               |               |              |
|------------------------|-------------------------------|---------------|---------------|--------------|
|                        | S483                          | 1.481809481   | 0.065707082   | 4.012135686  |
|                        | S484                          | 1.673558902   | 0.507228684   | -0.508516213 |
|                        | S485                          | 5.849719655   | 3.198484405   | 1.502702338  |
|                        | S486                          | 4.261612843   | -2.522631912  | 0.485372748  |
|                        | S487                          | 4.267522193   | 2.144802615   | 4.749680729  |
|                        | S488                          | 7.067993751   | -0.445788223  | 1.696587243  |
|                        | S489                          | 4.628634420   | -1.824118898  | 4.149337440  |
| D 35(2)<br>dissociated | bm2cnx2b6x2hn2n2xd235te.car_2 |               |               |              |
| Fe( 139) 0.559 -2.537  | C1                            | -2.397142420  | -2.164920489  | -8.830784710 |
| Fe( 140) 0.345 -0.152  | C2                            | -1.344167123  | -1.967792105  | -9.927632074 |
| Fe( 141) 0.527 -2.449  | C3                            | -4.742350271  | -1.827724097  | -8.181193776 |
| Fe( 142) 0.565 2.786   | C4                            | -5.094362553  | -3.219168751  | -7.660759614 |
| Fe( 143) 0.606 3.217   | C5                            | -5.221252817  | -5.616113784  | -8.104361628 |
| Fe( 144) 0.517 2.125   | C6                            | -4.223052751  | -6.148240655  | -7.071868297 |
| Fe( 145) 0.314 0.498   | C7                            | -1.943120152  | -6.005245266  | -6.180724606 |
|                        | C8                            | -2.183413860  | -5.319881048  | -4.831169675 |
|                        | C9                            | -2.842963403  | -3.290796322  | -3.649005574 |
|                        | C10                           | -4.064930941  | -3.843217796  | -2.898960528 |
|                        | C11                           | -6.290182460  | -4.821753174  | -3.032465396 |
|                        | C12                           | -6.097567584  | -6.249411014  | -2.500201584 |
|                        | C13                           | -5.443403121  | -8.548256432  | -3.031612147 |
|                        | C14                           | -4.248314665  | -9.025955369  | -2.200732612 |
|                        | C15                           | -1.862528507  | -8.748752043  | -1.688344365 |
|                        | C16                           | -1.406731352  | -7.906313255  | -0.493682415 |
|                        | C17                           | -1.725808120  | -5.766536649  | 0.718910903  |
|                        | C18                           | -2.829400487  | -5.620827751  | 1.782603764  |
|                        | C19                           | -1.293659640  | -4.420064655  | 0.075682647  |
|                        | C20                           | -1.050865492  | -3.335891385  | 1.127927793  |
|                        | C21                           | -0.052334806  | -4.617510304  | -0.803799654 |
|                        | C22                           | -5.189574542  | -5.093531511  | 2.265205936  |
|                        | C23                           | -5.828475276  | -6.464901167  | 2.571964220  |
|                        | C24                           | -6.218738146  | -4.063206621  | 1.746599219  |
|                        | C25                           | -7.461197144  | -4.022311547  | 2.643588313  |
|                        | C26                           | -5.585274025  | -2.669997533  | 1.640720629  |
|                        | C27                           | -6.812691462  | -8.519826615  | 1.725183047  |
|                        | C28                           | -6.040677363  | -9.420462838  | 2.671475009  |
|                        | C29                           | 7.384587365   | -11.106285876 | -1.461648549 |
|                        | C30                           | 7.455200933   | -9.945916826  | -0.470435723 |
|                        | C31                           | 6.181656115   | -8.837999906  | 1.372901497  |
|                        | C32                           | 6.231937416   | -9.558667642  | 2.733237942  |
|                        | C33                           | 4.841793685   | -8.107069494  | 1.171040870  |
|                        | C34                           | 4.576063967   | -7.017627716  | 2.212511632  |
|                        | C35                           | 3.389385365   | -6.145300169  | 1.806540451  |
|                        | C36                           | 2.016970261   | -4.658841742  | 3.281965902  |
|                        | C37                           | 7.226293906   | -9.581980156  | 4.969996481  |
|                        | C38                           | 6.557506173   | -8.794990961  | 6.075142733  |
|                        | C39                           | -1.002821947  | 0.819541007   | -5.839196154 |
|                        | C40                           | -2.243950401  | 1.446762588   | -5.180620340 |
|                        | C41                           | -0.007812347  | 0.437405391   | -4.719336342 |
|                        | C42                           | 1.161377192   | -0.477961928  | -5.140466466 |
|                        | C43                           | 2.414341893   | 0.248723225   | -5.628479983 |
|                        | C44                           | -3.304272082  | 3.599471664   | -4.641488963 |
|                        | C45                           | -4.726156856  | 3.559275000   | -5.220318297 |
|                        | C46                           | -2.830128862  | 5.055327353   | -4.461537569 |
|                        | C47                           | -6.257730803  | 2.405637335   | -6.749872465 |
|                        | C48                           | -6.848742528  | 1.194052466   | -6.011259246 |
|                        | C49                           | -6.425720448  | -0.656712292  | -4.446284247 |
|                        | C50                           | -6.458987164  | -0.472196391  | -2.928633123 |
|                        | C51                           | -5.799005634  | 0.828350477   | -0.960212594 |
|                        | C52                           | -7.214523095  | 1.141010652   | -0.413199280 |
|                        | C53                           | -4.947223555  | 2.043821262   | -0.566138622 |
|                        | C54                           | -3.484094218  | 2.008677542   | -0.871198222 |
|                        | C55                           | -2.571162721  | 1.006250382   | -1.089615645 |
|                        | C56                           | -1.450420643  | 2.918719333   | -0.996996832 |
|                        | C57                           | -9.219508212  | 2.529824835   | -0.825885632 |
|                        | C58                           | -10.223061512 | 1.457496667   | -0.408553958 |
|                        | C59                           | -9.757949820  | 3.337096870   | -2.031860588 |
|                        | C60                           | -10.744357097 | 4.425688466   | -1.726902615 |
|                        | C61                           | -11.841542231 | 4.445743868   | -0.886981016 |
|                        | C62                           | -11.635036416 | 6.387416650   | -1.934863673 |
|                        | C63                           | 2.401995843   | -4.255952672  | 8.460894844  |
|                        | C64                           | 3.675643318   | -5.080526832  | 8.417777459  |

|      |               |              |              |
|------|---------------|--------------|--------------|
| C65  | 1.993160821   | -3.983368066 | 6.991014638  |
| C66  | 0.686306621   | -3.234048305 | 6.878930980  |
| C67  | -0.545193240  | -3.915593468 | 6.844597434  |
| C68  | 0.660685034   | -1.827984779 | 6.826056377  |
| C69  | -1.757350481  | -3.223269028 | 6.759855895  |
| C70  | -0.540756508  | -1.122520128 | 6.754143025  |
| C71  | -1.749941564  | -1.822712062 | 6.717998222  |
| C72  | 0.238829490   | 3.895728524  | 8.278596594  |
| C73  | -0.798473406  | 4.996426610  | 8.023190458  |
| C74  | 0.334327793   | 2.975812952  | 7.053360934  |
| C75  | -1.164323199  | 7.392722304  | 7.606533849  |
| C76  | -1.705100836  | 7.487145980  | 6.178165604  |
| C77  | -1.541007269  | 6.643082452  | 3.860230830  |
| C78  | -2.615168011  | 5.552877035  | 3.659301960  |
| C79  | -0.313320904  | 6.452205984  | 2.948276294  |
| C80  | -0.560075513  | 6.415291520  | 1.437108684  |
| C81  | -1.010220275  | 7.731434127  | 0.778715158  |
| C82  | -3.228190520  | 8.847608561  | 1.019718413  |
| C83  | -3.440118761  | 3.335309248  | 4.243151134  |
| C84  | -4.683261025  | 3.500191512  | 5.134591673  |
| C85  | -2.833352626  | 1.953225032  | 4.527372953  |
| C86  | -5.469189296  | 4.079050792  | 7.374064291  |
| C87  | -6.434555663  | 5.237264721  | 7.608822530  |
| C88  | -7.254680765  | 7.435036151  | 6.879659423  |
| C89  | -8.688539791  | 7.294741082  | 6.327488426  |
| C90  | -6.570838257  | 8.702210307  | 6.322947158  |
| C91  | -6.365730809  | 8.625666496  | 4.814675871  |
| C92  | -10.186490466 | 6.103252414  | 4.798586658  |
| C93  | -11.302535266 | 5.804749087  | 5.793427819  |
| C94  | -10.097109363 | 4.964368340  | 3.748501277  |
| C95  | -9.090387371  | 5.269565936  | 2.663760802  |
| C96  | -9.448940041  | 6.059428848  | 1.561246211  |
| C97  | -7.758759617  | 4.832260090  | 2.760569960  |
| C98  | -8.507594564  | 6.430123310  | 0.596887990  |
| C99  | -6.795552645  | 5.216221633  | 1.820687002  |
| C100 | -7.183519453  | 6.016628555  | 0.748888833  |
| C101 | 9.770405713   | 4.175918591  | -1.302872996 |
| C102 | 8.502390353   | 4.159544664  | -2.140580998 |
| C103 | 6.021194153   | 4.225978921  | -2.048542365 |
| C104 | 5.216951218   | 5.501199890  | -1.775218405 |
| C105 | 3.991686982   | 6.780586592  | -0.088203288 |
| C106 | 4.123808054   | 7.244029638  | 1.358920767  |
| C107 | 4.939755437   | 6.839850452  | 3.632205997  |
| C108 | 6.268477982   | 7.460176223  | 4.012983924  |
| C109 | 5.467581547   | 5.760064995  | -6.320462134 |
| C110 | 4.054482136   | 6.349090182  | -6.399585157 |
| C111 | 5.376296249   | 4.244141591  | -6.036659781 |
| C112 | 6.712612382   | 3.537683401  | -6.324857754 |
| C113 | 6.703397949   | 2.136994732  | -5.755098016 |
| C114 | 2.103630694   | 7.165444231  | -5.170784438 |
| C115 | 2.005280450   | 8.324327125  | -4.199268315 |
| C116 | 1.017339177   | 6.077717428  | -4.996711621 |
| C117 | 1.326880352   | 5.147918581  | -3.853544509 |
| C118 | 1.012819927   | 5.496890186  | -2.529764191 |
| C119 | 2.045801933   | 3.961689316  | -4.085549134 |
| C120 | 1.451176278   | 4.700813356  | -1.466027516 |
| C121 | 2.483341860   | 3.167141753  | -3.020558344 |
| C122 | 2.203000090   | 3.545732997  | -1.704964388 |
| C123 | 10.843493802  | -1.651225681 | 1.273876102  |
| C124 | 11.058705359  | -2.768829169 | 2.307443086  |
| C125 | 10.055917510  | -2.124881117 | 0.040149593  |
| C126 | 9.640579499   | -1.053381801 | -0.921564420 |
| C127 | 10.451612112  | -0.343113086 | -1.784753745 |
| C128 | 8.334217938   | 0.185315003  | -2.161059457 |
| C129 | 11.620574088  | -5.080786376 | 2.808029107  |
| C130 | 12.661910300  | -4.713121485 | 3.842325180  |
| C131 | 4.260767623   | -4.076393162 | -3.739333300 |
| C132 | 4.869194048   | -4.381060165 | -2.400888496 |
| C133 | 6.279228431   | -3.698874045 | -2.186073526 |
| C134 | 7.262174649   | -4.154033858 | -3.303687323 |
| C135 | 8.700641965   | -3.676744909 | -3.048250657 |
| C136 | 9.723764785   | -4.289154115 | -3.963084892 |
| C137 | 6.834203396   | -4.257827093 | -0.840218896 |

|       |              |              |               |
|-------|--------------|--------------|---------------|
| C138  | 3.939328631  | 0.600648934  | 1.870073227   |
| Fe139 | 5.596250325  | 1.110348461  | 0.856284348   |
| Fe140 | 2.067826340  | 0.714406748  | 1.767370214   |
| Fe141 | 3.541621141  | 0.306195749  | 3.808519459   |
| Fe142 | 3.957028655  | 2.494398116  | 2.386175497   |
| Fe143 | 1.917242800  | 2.424007481  | 4.113266427   |
| Fe144 | 4.927342003  | -1.075663605 | 2.088098281   |
| Fe145 | 3.619041167  | -0.400929906 | -0.030839860  |
| H146  | 0.163723934  | -3.002426944 | -9.024976768  |
| H147  | 0.295821384  | -1.383811059 | -8.854774234  |
| H148  | -3.829489827 | -1.318611498 | -10.044973065 |
| H149  | -1.489248953 | -0.976772930 | -10.387031575 |
| H150  | -1.569061922 | -2.701112472 | -10.721588519 |
| H151  | -4.482213095 | -1.227018834 | -7.298710623  |
| H152  | -4.628038438 | -4.060594757 | -9.474402336  |
| H153  | -5.639224655 | -1.392685992 | -8.641191307  |
| H154  | -5.198724815 | -6.267990214 | -8.988117553  |
| H155  | -2.763101658 | -4.915622567 | -7.820260537  |
| H156  | -6.218029676 | -5.687383989 | -7.648814282  |
| H157  | -1.998607825 | -3.336467327 | -2.948813477  |
| H158  | -2.551987175 | -3.512971965 | -5.769188424  |
| H159  | -0.963163440 | -5.702162741 | -6.574624391  |
| H160  | -6.596954491 | -4.195897607 | -2.184751507  |
| H161  | -5.087068440 | -4.130411950 | -4.677436770  |
| H162  | -1.926824081 | -7.086821188 | -5.995594838  |
| H163  | -3.015005786 | -2.235513379 | -3.906838775  |
| H164  | -5.238332979 | -6.837529905 | -4.291651807  |
| H165  | -7.102936878 | -4.826317763 | -3.772110220  |
| H166  | -0.239939958 | -5.329593967 | -1.620577314  |
| H167  | 0.253241997  | -3.658846452 | -1.251704369  |
| H168  | 0.798366163  | -4.984628205 | -0.207636945  |
| H169  | -2.125155860 | -4.088157932 | -0.567814907  |
| H170  | -5.430947804 | -9.107444030 | -3.978094366  |
| H171  | -4.730529293 | -2.654759074 | 0.950002058   |
| H172  | -6.044776639 | -6.913773783 | 0.548229700   |
| H173  | -7.984157654 | -4.989630587 | 2.672867093   |
| H174  | -0.819798833 | -2.381067462 | 0.633528881   |
| H175  | -0.191414372 | -3.575818989 | 1.769255008   |
| H176  | 1.617194739  | -4.886345748 | 8.921704321   |
| H177  | -6.330134385 | -1.944096266 | 1.282460562   |
| H178  | -8.165811564 | -3.265104115 | 2.270023070   |
| H179  | -5.232566942 | -2.331679435 | 2.628538172   |
| H180  | -7.190896164 | -3.750472889 | 3.676814045   |
| H181  | -6.535961916 | -4.382737955 | 0.736856299   |
| H182  | -4.790832039 | -4.750525022 | 3.231175693   |
| H183  | -4.183388038 | -4.930340875 | 0.372034548   |
| H184  | -1.927260576 | -3.168551180 | 1.769654127   |
| H185  | -1.849372591 | 1.900501324  | 4.030767022   |
| H186  | -3.502620836 | 1.206321952  | 4.077231552   |
| H187  | -2.804990520 | 0.769900120  | 6.090764531   |
| H188  | -3.681160544 | -1.673009287 | 6.565643053   |
| H189  | -0.540505869 | -0.033575723 | 6.695132092   |
| H190  | 1.599985249  | -1.270662188 | 6.807695639   |
| H191  | -0.561627619 | -5.008464432 | 6.875788201   |
| H192  | -2.811927353 | -6.513682296 | -0.972380289  |
| H193  | -1.036029138 | -8.746592273 | -2.414217093  |
| H194  | -1.996311121 | -9.776526221 | -1.328623340  |
| H195  | -3.017905972 | -7.569111015 | -3.028414193  |
| H196  | -6.343627999 | -8.837308480 | -2.475568781  |
| H197  | -2.703534675 | -3.769638753 | 6.715581585   |
| H198  | -0.870606581 | -6.196958066 | 1.255598712   |
| H199  | -7.840690596 | -8.400354137 | 2.103593611   |
| H200  | -6.863463963 | -9.039761931 | 0.755289193   |
| H201  | -4.943255842 | -9.225682902 | 2.717251758   |
| H202  | 8.291700952  | -9.716731820 | 5.209156796   |
| H203  | 4.461491415  | 0.138968559  | -5.581559514  |
| H204  | 5.087106030  | -5.687174313 | -4.401211507  |
| H205  | 6.858375042  | 3.469251920  | -7.412522403  |
| H206  | 7.547884550  | 4.114077547  | -5.901697543  |
| H207  | 4.593169813  | 3.785347779  | -6.659192277  |
| H208  | 2.955900469  | 8.894906639  | -4.071643138  |
| H209  | 5.861202215  | 5.884790548  | -7.341130308  |
| H210  | 0.383217927  | 1.363936462  | -4.268037096  |

|      |               |              |              |
|------|---------------|--------------|--------------|
| H211 | 0.840425605   | -1.154792082 | -5.951129337 |
| H212 | 3.952874076   | 6.475434909  | -4.329423455 |
| H213 | 1.941012450   | 7.632444239  | -6.163733537 |
| H214 | 6.097794528   | 6.378612898  | -4.441624183 |
| H215 | 3.641373299   | -1.140876175 | -4.690103058 |
| H216 | 5.073206208   | 4.097877762  | -4.988438651 |
| H217 | 7.303080038   | 6.268896879  | -5.557046340 |
| H218 | -0.727727389  | 1.543682141  | -7.756368489 |
| H219 | -0.584731957  | -0.082097532 | -3.939790008 |
| H220 | 7.744740539   | 2.813737966  | -4.226042894 |
| H221 | 1.430595018   | -1.125507880 | -4.294204394 |
| H222 | -5.461815377  | -0.081618895 | -0.441671596 |
| H223 | -2.698638687  | -0.065240275 | -1.177911309 |
| H224 | -7.451288040  | -0.897623178 | -4.754582608 |
| H225 | -4.995557618  | 0.744473865  | -5.183593182 |
| H226 | -7.634889377  | 2.063172004  | -2.190839335 |
| H227 | -12.254492272 | 3.712982968  | -0.202677937 |
| H228 | -10.156123678 | 0.519282764  | -1.011079322 |
| H229 | -10.166819023 | 2.634170711  | -2.779665703 |
| H230 | -9.040342061  | 3.197978785  | 0.031469996  |
| H231 | -11.858903038 | 7.408357537  | -2.232586302 |
| H232 | -5.063819471  | 2.167158951  | 0.523824979  |
| H233 | -5.385992433  | 2.944412961  | -1.027369029 |
| H234 | -13.206783506 | 6.056363775  | -0.538302747 |
| H235 | -8.894624132  | 3.827223916  | -2.509291034 |
| H236 | -5.112129856  | 1.093484153  | -2.981096451 |
| H237 | -5.808183300  | -1.539335497 | -4.672710471 |
| H238 | -6.950328406  | 3.242333542  | -6.593030284 |
| H239 | -0.632477601  | 3.632578381  | -1.018593709 |
| H240 | -6.236733026  | 2.181012581  | -7.825299486 |
| H241 | 2.716125316   | -3.176297642 | 10.174836291 |
| H242 | 1.884431775   | -2.359398597 | 9.029554496  |
| H243 | -1.544814938  | 4.203925689  | 4.819493762  |
| H244 | -3.806387395  | 3.340648754  | 3.205817229  |
| H245 | -3.556074315  | 4.454180560  | 6.557583998  |
| H246 | -3.155852751  | 4.161563353  | -0.728070447 |
| H247 | -3.704902187  | 5.851089507  | -1.851693548 |
| H248 | -4.712655047  | 5.822466877  | -0.625254334 |
| H249 | -1.835266626  | 5.055709534  | -3.996618152 |
| H250 | -2.763437978  | 5.556071818  | -5.441951132 |
| H251 | -5.621484270  | 8.852011427  | 6.857547989  |
| H252 | -7.233248771  | 9.552077054  | 6.535287147  |
| H253 | -4.295845429  | 8.254994331  | 5.027309882  |
| H254 | -4.961157840  | 8.158933274  | 3.410035155  |
| H255 | -3.307791292  | 10.744681231 | 1.786117490  |
| H256 | -0.560504299  | 7.825056640  | -0.221605802 |
| H257 | -8.806459931  | 7.035933184  | -0.263073383 |
| H258 | -7.442491670  | 4.179185395  | 3.579487476  |
| H259 | -5.010907393  | 7.856654915  | 0.707563315  |
| H260 | 0.191409010   | 5.513676303  | 3.227195812  |
| H261 | -0.374975155  | 6.045970281  | 5.545940092  |
| H262 | -1.262261263  | 5.607478082  | 1.177040829  |
| H263 | -4.112158067  | 2.379953657  | -6.756716002 |
| H264 | -0.608603693  | 8.316502539  | 7.815132057  |
| H265 | -1.569828978  | 3.168912338  | -5.936732170 |
| H266 | 0.390967992   | 7.269731724  | 3.175792242  |
| H267 | -5.750258145  | 4.926228181  | 1.951813105  |
| H268 | -4.632362128  | 5.472582577  | -3.857841043 |
| H269 | -2.041281948  | 7.370464320  | 8.268468643  |
| H270 | -1.752421711  | 10.269789372 | 1.202663564  |
| H271 | -5.144479117  | 9.552027536  | 0.989573169  |
| H272 | 0.617675469   | 1.680524449  | -6.771913558 |
| H273 | -1.360533792  | -0.119137224 | -6.301974208 |
| H274 | -10.480878679 | 6.400126451  | 1.448434711  |
| H275 | -3.423796983  | 3.165425224  | -3.633805337 |
| H276 | -2.042063427  | 7.592020470  | 3.626518344  |
| H277 | -0.646388099  | 8.580697198  | 1.371892208  |
| H278 | 0.401751761   | 6.138223865  | 0.985663909  |
| H279 | -2.937943407  | 7.038050590  | 0.154897558  |
| H280 | -6.090177590  | 3.188376367  | 7.195015634  |
| H281 | -5.696443907  | 6.238665398  | 5.974889068  |
| H282 | -7.380907092  | 7.568678897  | 7.963657377  |
| H283 | -4.921398855  | 3.921603790  | 8.313413641  |



|      |              |               |              |
|------|--------------|---------------|--------------|
| H284 | -8.126999269 | 5.672325821   | 5.219137034  |
| H285 | 9.602747355  | 4.737266618   | -0.371630961 |
| H286 | 9.946394950  | 3.118514624   | -1.010887113 |
| H287 | 10.251851566 | -0.883057511  | 1.793354615  |
| H288 | 11.750627525 | 4.579220073   | -1.583267690 |
| H289 | 10.918852343 | 4.324880595   | -2.973381202 |
| H290 | 1.121900923  | 2.235133791   | 7.240074008  |
| H291 | -1.070334050 | 2.784267068   | 9.380048973  |
| H292 | 0.701369051  | 6.396575149   | 7.915532633  |
| H293 | -0.624708915 | 2.459967435   | 6.906728064  |
| H294 | -0.055612668 | 3.678856258   | 10.298308033 |
| H295 | 4.754594441  | 5.953829673   | 4.258286922  |
| H296 | 1.224382093  | 4.356594033   | 8.450065263  |
| H297 | 4.028411325  | -8.851617688  | 1.174246992  |
| H298 | 7.003652921  | -8.116053591  | 1.296010448  |
| H299 | 5.232005668  | 5.578830411   | 1.944959253  |
| H300 | 1.117001175  | -3.190158575  | 4.373253460  |
| H301 | 4.258215352  | 7.632888772   | -0.726733443 |
| H302 | 3.056787367  | 2.256322683   | -3.207521142 |
| H303 | 2.918327315  | 6.593244344   | -0.251255155 |
| H304 | 2.467142357  | -6.735884195  | 1.744192191  |
| H305 | 4.893628017  | 4.809258944   | 0.115227087  |
| H306 | 3.564798042  | -5.721036326  | 0.803638778  |
| H307 | 4.871772934  | -7.656015640  | 0.166320104  |
| H308 | 5.458381244  | -6.368564883  | 2.314649997  |
| H309 | 4.381867325  | -7.460806819  | 3.202560892  |
| H310 | 0.955494941  | 5.518007667   | -5.940881037 |
| H311 | 5.682554803  | -10.576970452 | 0.205696347  |
| H312 | 7.224471373  | -10.652631052 | -2.451922792 |
| H313 | 2.557845941  | 2.955218621   | -0.858311404 |
| H314 | 6.629848061  | -12.803001945 | -0.571274547 |
| H315 | 5.983934982  | -12.497746718 | -2.044561636 |
| H316 | 3.907158778  | -4.294806216  | 2.704499307  |
| H317 | 1.229696290  | 4.970159230   | -0.431119322 |
| H318 | 2.270888318  | 3.656018531   | -5.109649808 |
| H319 | 10.841970714 | -6.304624917  | -0.476819429 |
| H320 | 10.676451303 | -2.855139536  | -0.510372338 |
| H321 | 8.457017924  | -6.139917896  | 0.045804657  |
| H322 | 11.408387151 | -5.672370896  | -1.766369152 |
| H323 | 6.878553305  | 7.836812829   | 3.156319854  |
| H324 | 6.912499926  | -4.022676416  | 1.785884233  |
| H325 | 4.965229622  | -5.465699205  | -2.246342431 |
| H326 | 7.380371908  | 4.278743917   | -0.432598748 |
| H327 | 7.246940746  | -5.254320500  | -3.352390666 |
| H328 | 9.886262937  | 1.050850071   | -3.311299334 |
| H329 | 7.466561306  | 0.641464141   | -2.621044721 |
| H330 | 8.389822668  | -11.559809404 | -1.479806125 |
| H331 | 2.647969685  | -2.733178411  | 3.678293749  |
| H332 | 7.905484603  | -5.778739121  | 3.090536518  |
| H333 | 6.626456050  | -3.553775953  | 3.239115481  |
| H334 | 7.571326920  | -8.120043077  | 3.426447965  |
| H335 | 1.183587588  | -6.542398912  | 3.354748014  |
| H336 | 10.186873107 | -4.495351202  | -5.785143655 |
| H337 | 8.738419813  | -2.582783035  | -3.162398121 |
| H338 | 9.013744558  | -3.917309405  | -2.026623441 |
| H339 | 6.914874923  | -3.754585025  | -4.267112761 |
| H340 | 5.499941651  | 3.338949902   | -1.654997807 |
| H341 | 0.449987355  | 6.414022656   | -2.339393851 |
| H342 | 0.060158972  | 6.598814637   | -4.845696297 |
| H343 | 4.213548019  | -3.959118676  | -1.628745176 |
| H344 | 8.828702944  | -6.632047156  | 2.173668046  |
| H345 | 8.974193623  | -7.601255620  | 0.137087069  |
| H346 | 0.110353714  | -5.262525345  | 3.784962956  |
| H347 | 11.527729659 | -0.335655722  | -1.917125349 |
| H348 | 9.154641833  | -2.656654658  | 0.371883405  |
| H349 | 6.134896783  | 4.131574569   | -3.130127893 |
| H350 | 4.154375995  | 7.582746343   | 3.850075462  |
| H351 | 1.917871415  | -4.956443508  | 6.480510104  |
| H352 | 2.798713438  | -3.408325152  | 6.507924931  |
| H353 | 12.588942992 | -0.672497735  | 1.728665873  |
| H354 | 12.756935162 | -1.760623922  | 0.520605358  |
| H355 | 12.008173680 | -5.944965087  | 2.245831592  |
| H356 | 11.402699991 | -4.243016813  | 0.859586333  |

|       |               |               |              |
|-------|---------------|---------------|--------------|
| H357  | 13.403806743  | -3.946489609  | 3.512680502  |
| H358  | 10.692081065  | -5.397569230  | 3.309881076  |
| H359  | 4.606221578   | -4.480732499  | 8.259336062  |
| H360  | -10.965937807 | 5.349158652   | 6.754059807  |
| H361  | 6.752313929   | -10.578422462 | 4.957865292  |
| H362  | 5.691726910   | -8.167418654  | 5.754936333  |
| H363  | -10.448807711 | 7.045450272   | 4.289429508  |
| H364  | -9.836788895  | 4.022799588   | 4.256743862  |
| H365  | -11.101063895 | 4.839505615   | 3.317959052  |
| H366  | 3.209182550   | -1.142540211  | -1.271250313 |
| H367  | -6.630052310  | 6.888829459   | -0.903822976 |
| H368  | 1.610195301   | -0.720510748  | 1.794993494  |
| H369  | 0.862002058   | -0.875328164  | -0.355395938 |
| H370  | -0.392195217  | 1.125791410   | -1.177633918 |
| Mo371 | 6.134782252   | -1.332810503  | -0.296244060 |
| N372  | 0.042497916   | -2.116342185  | -9.521824514 |
| N373  | -3.668205676  | -1.799924029  | -9.163422217 |
| N374  | -4.950763520  | -4.250855199  | -8.528211071 |
| N375  | -2.952424337  | -5.684064249  | -7.178536897 |
| N376  | -2.536738388  | -4.009122136  | -4.876724541 |
| N377  | -5.104103701  | -4.261972481  | -3.663248908 |
| N378  | -5.502256504  | -7.129591643  | -3.346793583 |
| N379  | -3.088818422  | -8.324289665  | -2.340543071 |
| N380  | -2.090871892  | -6.749544260  | -0.294205348 |
| N381  | -4.057766724  | -5.220376109  | 1.343275498  |
| N382  | -6.146025953  | -7.247981707  | 1.508645793  |
| N383  | 6.297827527   | -12.052601991 | -1.180942658 |
| N384  | 6.373822257   | -9.828304303  | 0.322373804  |
| N385  | 3.185849969   | -5.021464727  | 2.729760429  |
| N386  | 1.000659712   | -5.545271543  | 3.385442073  |
| N387  | 1.838636000   | -3.394130083  | 3.684488169  |
| N388  | 7.051401178   | -8.995772683  | 3.655283241  |
| N389  | -0.416099663  | 1.754054519   | -6.805880422 |
| N390  | 3.589897812   | -0.304433680  | -5.275006395 |
| N391  | -2.334324365  | 2.790430797   | -5.351376213 |
| N392  | -4.928854156  | 2.790273596   | -6.310146567 |
| N393  | -5.986189469  | 0.485148171   | -5.226414279 |
| N394  | -5.806860699  | 0.617849160   | -2.406942885 |
| N395  | -2.751467544  | 3.189935207   | -0.825248346 |
| N396  | -1.326891197  | 1.599975978   | -1.168862411 |
| N397  | -7.975815750  | 1.896121730   | -1.246674003 |
| N398  | -10.627062068 | 5.644679147   | -2.376417925 |
| N399  | -12.390903904 | 5.703081023   | -1.031143368 |
| N400  | 2.668508065   | -3.002543668  | 9.168139281  |
| N401  | -0.095144476  | 3.089281388   | 9.461892454  |
| N402  | -0.305341836  | 6.259391543   | 7.884116832  |
| N403  | -1.088780686  | 6.728769734   | 5.246618616  |
| N404  | -2.467238896  | 7.829593127   | 0.627433074  |
| N405  | -2.694093519  | 10.001638948  | 1.467002054  |
| N406  | -4.575567880  | 8.712018397   | 1.057927937  |
| N407  | -2.462657197  | 4.408388833   | 4.377517219  |
| N408  | -4.514817870  | 4.215659415   | 6.283833585  |
| N409  | -6.426773237  | 6.247045963   | 6.688015077  |
| N410  | -5.116094254  | 8.280758391   | 4.409503090  |
| N411  | -8.916212607  | 6.253046798   | 5.490588509  |
| N412  | 10.869055386  | 4.784263013   | -2.059083584 |
| N413  | 7.350445440   | 4.299665880   | -1.456601277 |
| N414  | 4.774781059   | 5.635292136   | -0.509390998 |
| N415  | 4.855295184   | 6.493844162   | 2.224325828  |
| N416  | 6.327672627   | 6.546259976   | -5.428715418 |
| N417  | 3.464140072   | 6.661700759   | -5.211955469 |
| N418  | 12.130352590  | -1.037777110  | 0.889069751  |
| N419  | 8.312848562   | -0.699923893  | -1.168520917 |
| N420  | 9.609644366   | 0.429798064   | -2.555692853 |
| N421  | 11.393443719  | -4.008506511  | 1.852416384  |
| N422  | -2.260244790  | -0.465078134  | 2.352213408  |
| N423  | -2.019084586  | 0.465036705   | 1.800504190  |
| O424  | -2.129833172  | -2.668794857  | -7.724180522 |
| O425  | -5.504022766  | -3.374398310  | -6.498124261 |
| O426  | -4.574896662  | -6.977269965  | -6.217242149 |
| O427  | -2.062679000  | -5.935552171  | -3.760322615 |
| O428  | -4.091549411  | -3.880818532  | -1.658476046 |
| O429  | -6.511575927  | -6.570621191  | -1.372750206 |

|      |               |               |              |
|------|---------------|---------------|--------------|
| O430 | -4.362486280  | -10.030912998 | -1.486751978 |
| O431 | -0.450743252  | -8.285221270  | 0.197384388  |
| O432 | -2.596402532  | -5.860707200  | 2.977446655  |
| O433 | -6.052966567  | -6.829659186  | 3.737755231  |
| O434 | -6.555807589  | -10.338675951 | 3.291058078  |
| O435 | 8.449482499   | -9.189373408  | -0.472291398 |
| O436 | 5.555357584   | -10.583416772 | 2.930276924  |
| O437 | 6.911903479   | -8.842637746  | 7.242053819  |
| O438 | -3.089893206  | 0.776729616   | -4.547609687 |
| O439 | 2.348440348   | 1.283017566   | -6.331084239 |
| O440 | -5.638009233  | 4.180061949   | -4.634533779 |
| O441 | -3.723429876  | 5.779607596   | -3.600021002 |
| O442 | -8.041819433  | 0.907960518   | -6.165635097 |
| O443 | -7.081318255  | -1.265493360  | -2.218500420 |
| O444 | -7.550731496  | 0.827868059   | 0.731110111  |
| O445 | -11.059528068 | 1.600503675   | 0.465650331  |
| O446 | 3.707077354   | -6.298524636  | 8.519476780  |
| O447 | -2.910228993  | -1.079202141  | 6.626026414  |
| O448 | -2.018598023  | 4.759019591   | 7.955205632  |
| O449 | -2.647202510  | 8.270262828   | 5.938117594  |
| O450 | -3.566295870  | 5.746449098   | 2.880678350  |
| O451 | -5.749575333  | 2.951218891   | 4.821006353  |
| O452 | -2.709694357  | 1.731748913   | 5.931986478  |
| O453 | -7.203196935  | 5.219855041   | 8.578319295  |
| O454 | -9.574095561  | 8.095743279   | 6.659550848  |
| O455 | -7.304560346  | 8.800281198   | 4.021269982  |
| O456 | -12.481820484 | 6.007153519   | 5.554549694  |
| O457 | -6.194807324  | 6.431388217   | -0.159021472 |
| O458 | 8.565148328   | 3.989510066   | -3.385083510 |
| O459 | 5.013922387   | 6.348769277   | -2.673351540 |
| O460 | 3.533557472   | 8.285671626   | 1.691753183  |
| O461 | 6.657725648   | 7.559067612   | 5.165425610  |
| O462 | 3.471964038   | 6.496170371   | -7.487329408 |
| O463 | 6.117994204   | 1.195251451   | -6.281952490 |
| O464 | 7.334960323   | 1.962296672   | -4.578166931 |
| O465 | 0.982229347   | 8.660444677   | -3.619902929 |
| O466 | 11.013761540  | -2.536426979  | 3.530170738  |
| O467 | 12.752739671  | -5.256974513  | 4.933417960  |
| O468 | 3.561072142   | -3.108557281  | -4.000882053 |
| O469 | 4.530675465   | -4.964302852  | -4.749537104 |
| O470 | 10.711982068  | -4.923438336  | -3.601783645 |
| O471 | 9.466170264   | -4.063191980  | -5.278670717 |
| O472 | 7.054238944   | -3.379464327  | 0.081374127  |
| O473 | 7.078339226   | -5.482614380  | -0.725694870 |
| O474 | 6.146790174   | -2.325610846  | -2.150149270 |
| O475 | 8.473638193   | -6.590395270  | 3.101747444  |
| O476 | 6.763981309   | -4.360574678  | 2.707030557  |
| O477 | -3.754590728  | 5.745604817   | -0.860409167 |
| O478 | 11.694878176  | -6.039307776  | -0.904602633 |
| O479 | 9.217653388   | -6.679483092  | 0.410256135  |
| S480 | 0.730695025   | 3.898868117   | 5.494836533  |
| S481 | 1.801127251   | 3.057521736   | 1.863650944  |
| S482 | 5.131646754   | 0.608667933   | -1.288773913 |
| S483 | 1.305148426   | 0.281994096   | 3.870069613  |
| S484 | 1.497683672   | 0.332091542   | -0.367644572 |
| S485 | 5.840236356   | 3.272355259   | 1.421629227  |
| S486 | 4.156859550   | -2.450514584  | 0.515767295  |
| S487 | 4.152388510   | 2.270830550   | 4.678920673  |
| S488 | 7.034373596   | -0.415276341  | 1.713098209  |
| S489 | 4.520851134   | -1.654184832  | 4.195531733  |

Atomic coordinates and electronic state for the structure with promotional N<sub>2</sub> at *exo*-Fe2 and reactive N<sub>2</sub> at *endo*-Fe6, shown in Fig 7, together with the transition state for dissociation, and the dissociated form.

| structure, S, spin densities | filename, coordinates       |
|------------------------------|-----------------------------|
| associated                   | bm22b2n2x6x6n2ncnxdtr.car_3 |

|          |              |     |               |               |               |
|----------|--------------|-----|---------------|---------------|---------------|
|          | S=3/2        | C1  | 2.011406082   | 0.661737048   | -9.263681736  |
| Fe( 139) | 0.545 2.517  | C2  | 3.375613270   | 0.178647804   | -9.762176575  |
| Fe( 140) | 0.411 -1.171 | C3  | 0.289225886   | 2.403860015   | -9.378453855  |
| Fe( 141) | 0.570 2.748  | C4  | -0.941426594  | 1.536051043   | -9.641130574  |
| Fe( 142) | 0.519 -2.337 | C5  | -2.013873167  | -0.151848772  | -11.044403555 |
| Fe( 143) | 0.557 2.861  | C6  | -2.196768292  | -1.278397570  | -10.021166314 |
| Fe( 144) | 0.488 -2.041 | C7  | -1.123283955  | -2.730747979  | -8.367406365  |
| Fe( 145) | 0.259 -0.012 | C8  | -1.646950946  | -2.162218011  | -7.045906598  |
|          |              | C9  | -1.700971417  | -0.275939558  | -5.501155101  |
|          |              | C10 | -3.203263372  | 0.043746755   | -5.560990813  |
|          |              | C11 | -5.117474228  | 0.681319986   | -6.912005061  |
|          |              | C12 | -5.989232237  | -0.582073972  | -6.948702279  |
|          |              | C13 | -6.393569096  | -2.742795166  | -8.030706975  |
|          |              | C14 | -6.280900686  | -3.937738110  | -7.077422678  |
|          |              | C15 | -4.820535210  | -5.260698862  | -5.602528709  |
|          |              | C16 | -4.710796254  | -4.968688723  | -4.102288624  |
|          |              | C17 | -4.656111004  | -3.156202647  | -2.393869713  |
|          |              | C18 | -5.969514810  | -2.485499685  | -1.956867412  |
|          |              | C19 | -3.413206402  | -2.248050716  | -2.227440714  |
|          |              | C20 | -3.454181950  | -1.500873977  | -0.889321747  |
|          |              | C21 | -2.129987456  | -3.066029570  | -2.410087338  |
|          |              | C22 | -7.453610158  | -0.538964877  | -2.166311675  |
|          |              | C23 | -8.750250792  | -1.170131965  | -2.703338460  |
|          |              | C24 | -7.297893817  | 0.949353309   | -2.562654620  |
|          |              | C25 | -8.572449717  | 1.743567584   | -2.257082438  |
|          |              | C26 | -6.095162904  | 1.579980350   | -1.845832719  |
|          |              | C27 | -9.933052375  | -2.144138347  | -4.581753560  |
|          |              | C28 | -10.426955018 | -3.345375647  | -3.797634565  |
|          |              | C29 | -0.050497448  | -13.175602408 | -2.938378496  |
|          |              | C30 | 0.061265276   | -12.404801214 | -1.622278228  |
|          |              | C31 | -1.183634558  | -10.820831026 | -0.145827912  |
|          |              | C32 | -2.282760882  | -11.478661676 | 0.710149449   |
|          |              | C33 | -1.538694102  | -9.372178103  | -0.520991682  |
|          |              | C34 | -1.770739203  | -8.472511397  | 0.694520256   |
|          |              | C35 | -1.819646162  | -6.998473827  | 0.295087177   |
|          |              | C36 | -2.923504929  | -5.221016389  | 1.682772830   |
|          |              | C37 | -2.864215099  | -12.331859339 | 2.932741889   |
|          |              | C38 | -3.441978498  | -11.397318174 | 3.973631319   |
|          |              | C39 | 2.995113651   | 1.758421630   | -5.020847812  |
|          |              | C40 | 2.134820567   | 2.981385473   | -4.669087858  |
|          |              | C41 | 2.832825127   | 0.734906875   | -3.871318985  |
|          |              | C42 | 3.357526453   | -0.689173822  | -4.143525217  |
|          |              | C43 | 4.824274096   | -0.922184963  | -3.786234707  |
|          |              | C44 | 2.216952394   | 5.233609983   | -3.697169516  |
|          |              | C45 | 1.518866950   | 6.158230774   | -4.703415529  |
|          |              | C46 | 3.181407342   | 6.037657706   | -2.801296542  |
|          |              | C47 | 0.730190639   | 6.432233348   | -7.003774792  |
|          |              | C48 | -0.697979816  | 5.866767292   | -7.042613424  |
|          |              | C49 | -2.225676479  | 4.077596660   | -6.324430355  |
|          |              | C50 | -2.971498142  | 4.101492705   | -4.990112105  |
|          |              | C51 | -2.921035558  | 4.567722853   | -2.579141653  |
|          |              | C52 | -3.995859809  | 5.677022781   | -2.468436981  |
|          |              | C53 | -1.913858731  | 4.857319038   | -1.456016122  |
|          |              | C54 | -0.787926801  | 3.890751305   | -1.270845766  |
|          |              | C55 | -0.596148510  | 2.569565295   | -1.592194528  |
|          |              | C56 | 1.189195441   | 3.250913794   | -0.451298746  |
|          |              | C57 | -4.473793313  | 8.035536723   | -3.043650328  |
|          |              | C58 | -5.923012219  | 7.803664959   | -3.467147864  |
|          |              | C59 | -3.804288645  | 9.100465402   | -3.942670711  |
|          |              | C60 | -4.091429801  | 10.533101320  | -3.598104237  |
|          |              | C61 | -5.260181078  | 11.148583741  | -3.193709661  |
|          |              | C62 | -3.614623872  | 12.626635428  | -3.327342974  |
|          |              | C63 | -5.007686909  | -5.462722231  | 6.576714124   |
|          |              | C64 | -4.520782877  | -6.895807752  | 6.692906904   |
|          |              | C65 | -4.421888271  | -4.902607799  | 5.260576375   |
|          |              | C66 | -4.872182588  | -3.492274310  | 4.957261992   |
|          |              | C67 | -6.057485181  | -3.244564816  | 4.239612560   |
|          |              | C68 | -4.106868999  | -2.385983376  | 5.365143091   |
|          |              | C69 | -6.465290913  | -1.940615844  | 3.937279530   |
|          |              | C70 | -4.504016052  | -1.079503521  | 5.077654943   |
|          |              | C71 | -5.685177225  | -0.858053404  | 4.362606248   |
|          |              | C72 | -2.331853787  | 2.107817504   | 8.605644055   |
|          |              | C73 | -2.269175917  | 3.631904340   | 8.443838952   |

|       |              |               |              |
|-------|--------------|---------------|--------------|
| C74   | -2.068928871 | 1.419471900   | 7.258180799  |
| C75   | -1.010014379 | 5.687195990   | 8.910660022  |
| C76   | -0.575135170 | 6.217750584   | 7.543841293  |
| C77   | 0.281466325  | 5.660339882   | 5.297583690  |
| C78   | -0.901692772 | 5.555833105   | 4.311091982  |
| C79   | 1.490995598  | 4.806477077   | 4.878037362  |
| C80   | 2.086632835  | 5.055110141   | 3.488577071  |
| C81   | 2.863421882  | 6.368155095   | 3.279650578  |
| C82   | 1.805980778  | 8.637840192   | 3.271487562  |
| C83   | -2.948650847 | 4.419955068   | 3.628341339  |
| C84   | -4.132131205 | 5.317325346   | 4.041481832  |
| C85   | -3.466546868 | 2.980217713   | 3.508900002  |
| C86   | -5.490909728 | 6.086200658   | 5.922946646  |
| C87   | -5.670652790 | 7.577683693   | 6.189701556  |
| C88   | -4.681745522 | 9.830311880   | 6.107937619  |
| C89   | -5.375669885 | 10.729253365  | 5.061507202  |
| C90   | -3.256779916 | 10.346887356  | 6.410600014  |
| C91   | -2.347952501 | 10.242019311  | 5.192022573  |
| C92   | -6.198832944 | 10.913810266  | 2.755424132  |
| C93   | -7.628082570 | 11.371032013  | 3.028283290  |
| C94   | -6.153470077 | 10.065424367  | 1.456586549  |
| C95   | -4.738119110 | 9.726468814   | 1.046548012  |
| C96   | -3.967356056 | 10.652618399  | 0.325778205  |
| C97   | -4.139262069 | 8.510895293   | 1.419645492  |
| C98   | -2.635073407 | 10.388365396  | 0.002962514  |
| C99   | -2.799873145 | 8.237725800   | 1.124661305  |
| C100  | -2.061278378 | 9.188388600   | 0.423926608  |
| C101  | 9.280499674  | -3.217484564  | 4.098013628  |
| C102  | 8.906496143  | -2.308093887  | 2.940244446  |
| C103  | 7.293802481  | -0.587351693  | 2.162599632  |
| C104  | 7.300592094  | 0.864085003   | 2.659227038  |
| C105  | 6.304817141  | 2.442854005   | 4.242372570  |
| C106  | 5.853542808  | 2.518100665   | 5.698252494  |
| C107  | 4.869675501  | 1.437066099   | 7.658585872  |
| C108  | 5.903015170  | 1.129590934   | 8.726006925  |
| C109  | 10.020390430 | 1.345072720   | -0.938073771 |
| C110  | 9.428413348  | 2.726610571   | -1.248322192 |
| C111  | 9.020003376  | 0.243504693   | -1.354706444 |
| C112  | 9.698271834  | -1.138049083  | -1.421530585 |
| C113  | 8.662141147  | -2.230446677  | -1.563050946 |
| C114  | 7.915731122  | 4.518582664   | -0.555305744 |
| C115  | 7.908377929  | 5.348874225   | 0.713160900  |
| C116  | 6.546358268  | 4.419007959   | -1.271929278 |
| C117  | 5.659958639  | 3.394075451   | -0.618347391 |
| C118  | 4.917312778  | 3.710892025   | 0.531266223  |
| C119  | 5.677309004  | 2.061177252   | -1.065462595 |
| C120  | 4.269613155  | 2.701247394   | 1.249936587  |
| C121  | 5.028851644  | 1.052978713   | -0.346776492 |
| C122  | 4.348828812  | 1.369703240   | 0.833105758  |
| C123  | 5.775655322  | -8.419107522  | 4.414016169  |
| C124  | 4.769064180  | -9.460360676  | 4.932789989  |
| C125  | 5.612534947  | -8.152476364  | 2.909755318  |
| C126  | 6.383646030  | -6.992531103  | 2.355198478  |
| C127  | 7.753416465  | -6.885160810  | 2.219100759  |
| C128  | 6.786043455  | -5.132978928  | 1.269652108  |
| C129  | 3.597896882  | -11.570710444 | 4.634229297  |
| C130  | 3.923145530  | -12.054750866 | 6.029753523  |
| C131  | 2.868370622  | -5.665287619  | -3.291476589 |
| C132  | 2.387979692  | -6.356537247  | -2.044960666 |
| C133  | 3.564578617  | -6.751930981  | -1.065858967 |
| C134  | 4.607212833  | -7.629116624  | -1.822186929 |
| C135  | 5.673529614  | -8.214754405  | -0.880129957 |
| C136  | 6.506061195  | -9.294173288  | -1.511316430 |
| C137  | 2.958979944  | -7.667978220  | 0.040213521  |
| C138  | 1.864918149  | -2.247592757  | 3.138815659  |
| Fe139 | 3.771323357  | -2.869549091  | 3.108875271  |
| Fe140 | 0.817366630  | -0.305071763  | 2.678231879  |
| Fe141 | 0.500534936  | -2.464234146  | 4.542454389  |
| Fe142 | 2.666889038  | -1.090008606  | 4.527463825  |
| Fe143 | 0.460303624  | 0.203841988   | 5.260787841  |
| Fe144 | 1.644498331  | -4.225137954  | 3.171177801  |
| Fe145 | 1.785653851  | -2.879711450  | 0.855156783  |
| H146  | 3.387824911  | -1.590822037  | -8.748521932 |

|      |               |               |               |
|------|---------------|---------------|---------------|
| H147 | 4.276154055   | -0.425883697  | -8.027438677  |
| H148 | 2.162030264   | 2.364844707   | -10.411475235 |
| H149 | 4.043879349   | 1.042981511   | -9.899261840  |
| H150 | 3.208178245   | -0.239020751  | -10.770414207 |
| H151 | 0.301043838   | 2.595033868   | -8.295649333  |
| H152 | -0.087621868  | 0.762142075   | -11.341301889 |
| H153 | 0.154449987   | 3.362504056   | -9.897187135  |
| H154 | -1.839118859  | -0.597796310  | -12.032623934 |
| H155 | -0.191365707  | -1.242829657  | -9.581436020  |
| H156 | -2.961169865  | 0.401955103   | -11.078183725 |
| H157 | -1.551787151  | -0.916685390  | -4.622055779  |
| H158 | -0.479618967  | -0.468587867  | -7.265347490  |
| H159 | -0.115778916  | -3.141188096  | -8.213824436  |
| H160 | -5.468586396  | 1.295098982   | -6.072899915  |
| H161 | -3.063990082  | 0.581899656   | -7.554919773  |
| H162 | -1.790868290  | -3.552644370  | -8.653211915  |
| H163 | -1.131560283  | 0.652760883   | -5.350351550  |
| H164 | -4.712858911  | -1.460480206  | -8.322009173  |
| H165 | -5.271901034  | 1.238905389   | -7.846072756  |
| H166 | -2.106159913  | -3.546862293  | -3.399082573  |
| H167 | -1.244950448  | -2.415787056  | -2.327692169  |
| H168 | -2.037988130  | -3.846702751  | -1.641137918  |
| H169 | -3.444310145  | -1.496018060  | -3.031185279  |
| H170 | -6.155724493  | -3.106032940  | -9.040914128  |
| H171 | -5.146265781  | 1.093910018   | -2.112875218  |
| H172 | -7.950636738  | -1.349212555  | -4.616410009  |
| H173 | -9.441460438  | 1.368654043   | -2.816030947  |
| H174 | -2.520760663  | -0.939893252  | -0.738611418  |
| H175 | -3.552855792  | -2.193029965  | -0.042389206  |
| H176 | -6.109498187  | -5.501077134  | 6.467570566   |
| H177 | -6.010176656  | 2.642274437   | -2.117962713  |
| H178 | -8.422408740  | 2.799429651   | -2.527906613  |
| H179 | -6.221957295  | 1.517566716   | -0.752721408  |
| H180 | -8.813490851  | 1.699358984   | -1.183055011  |
| H181 | -7.119091554  | 0.987475494   | -3.652671834  |
| H182 | -7.543894502  | -0.608810913  | -1.070947597  |
| H183 | -5.608687368  | -0.878952881  | -3.213600055  |
| H184 | -4.287693214  | -0.785716891  | -0.849010847  |
| H185 | -2.611315875  | 2.304667363   | 3.346744799   |
| H186 | -4.116101705  | 2.945371336   | 2.618925687   |
| H187 | -4.796272099  | 1.884614023   | 4.443497462   |
| H188 | -6.835080300  | 0.478548182   | 3.547053608   |
| H189 | -3.882818162  | -0.235081603  | 5.378332078   |
| H190 | -3.158553524  | -2.545417350  | 5.883061466   |
| H191 | -6.669808236  | -4.083886898  | 3.896974205   |
| H192 | -4.868964008  | -2.985681331  | -4.517687648  |
| H193 | -3.881765627  | -5.747639456  | -5.906483532  |
| H194 | -5.637738276  | -5.981706002  | -5.737899454  |
| H195 | -4.280765919  | -3.517001428  | -6.695452157  |
| H196 | -7.447967621  | -2.438076455  | -8.020197588  |
| H197 | -7.379692805  | -1.768903596  | 3.363432687   |
| H198 | -4.552863997  | -4.040528439  | -1.751063993  |
| H199 | -10.756895474 | -1.416625797  | -4.671888894  |
| H200 | -9.683888065  | -2.494636234  | -5.595532609  |
| H201 | -9.646374178  | -3.874101264  | -3.202254010  |
| H202 | -2.377968718  | -13.183880101 | 3.431280923   |
| H203 | 6.098389777   | -2.340047398  | -3.038246447  |
| H204 | 2.788289088   | -7.375130054  | -4.180656283  |
| H205 | 10.359247704  | -1.174290433  | -2.299997134  |
| H206 | 10.308873117  | -1.306925641  | -0.522769908  |
| H207 | 8.589648935   | 0.474658738   | -2.341781809  |
| H208 | 8.762178347   | 5.145018954   | 1.400909528   |
| H209 | 10.886365401  | 1.279541513   | -1.614867741  |
| H210 | 3.313418315   | 1.145635673   | -2.968098863  |
| H211 | 3.234140839   | -0.941391974  | -5.211031433  |
| H212 | 8.330903296   | 2.702714190   | 0.514092221   |
| H213 | 8.596452042   | 5.074009001   | -1.231386426  |
| H214 | 9.780807191   | 1.198679639   | 1.118067941   |
| H215 | 4.412166891   | -2.845586821  | -3.108413848  |
| H216 | 8.181702925   | 0.234405294   | -0.641913115  |
| H217 | 11.134481021  | 0.456654665   | 0.539484524   |
| H218 | 4.599691789   | 2.281671468   | -6.211543847  |
| H219 | 1.755398041   | 0.659487973   | -3.664585512  |

|      |              |              |              |
|------|--------------|--------------|--------------|
| H220 | 8.845317626  | -2.577235422 | 0.366458588  |
| H221 | 2.733967992  | -1.408615345 | -3.593181178 |
| H222 | -3.441696702 | 3.615278029  | -2.405373885 |
| H223 | -1.223358132 | 1.864764803  | -2.125444002 |
| H224 | -2.862880999 | 4.591814282  | -7.055955300 |
| H225 | -0.139436911 | 4.225789398  | -5.887658863 |
| H226 | -2.938187501 | 6.768925791  | -3.837754294 |
| H227 | -6.257869539 | 10.769432297 | -3.000287839 |
| H228 | -6.039608973 | 7.080407771  | -4.310584715 |
| H229 | -4.058584181 | 8.892416681  | -4.997635461 |
| H230 | -4.465503572 | 8.361077582  | -1.991296302 |
| H231 | -3.105417575 | 13.586131628 | -3.278490467 |
| H232 | -2.491771708 | 4.903410055  | -0.518755245 |
| H233 | -1.490197602 | 5.863133249  | -1.611088547 |
| H234 | -5.570892167 | 13.211910119 | -2.724689300 |
| H235 | -2.713961009 | 8.971894674  | -3.857806328 |
| H236 | -1.281080706 | 4.708036526  | -3.971582376 |
| H237 | -2.150011665 | 3.029287093  | -6.649213187 |
| H238 | 0.643846350  | 7.509869609  | -6.817798065 |
| H239 | 2.152092146  | 3.242038460  | 0.055472946  |
| H240 | 1.179164119  | 6.296240116  | -7.996872646 |
| H241 | -5.108068138 | -4.922755915 | 8.549774246  |
| H242 | -4.682461135 | -3.697094293 | 7.556734189  |
| H243 | -1.533521458 | 3.753631641  | 5.129060664  |
| H244 | -2.650717850 | 4.754091063  | 2.624428635  |
| H245 | -3.599672631 | 5.155317256  | 6.016444781  |
| H246 | 0.523412170  | 5.260681180  | -0.204613323 |
| H247 | 1.580788581  | 7.018073035  | -0.630574391 |
| H248 | 0.223166475  | 7.535917944  | 0.023855921  |
| H249 | 3.609387231  | 5.372129595  | -2.038829335 |
| H250 | 4.006668236  | 6.446527224  | -3.408470524 |
| H251 | -2.859804832 | 9.779081137  | 7.264684166  |
| H252 | -3.339173621 | 11.404143263 | 6.693857613  |
| H253 | -1.372813885 | 8.530600890  | 5.951150140  |
| H254 | -1.009134233 | 8.982907841  | 4.303174490  |
| H255 | 2.203563090  | 9.940947461  | 4.804351350  |
| H256 | 3.697455394  | 6.199687180  | 2.581998633  |
| H257 | -2.049018474 | 11.113067636 | -0.568029063 |
| H258 | -4.717603829 | 7.745752594  | 1.945788686  |
| H259 | 0.332333110  | 9.149822477  | 1.921777415  |
| H260 | 1.206403874  | 3.743269362  | 4.928304411  |
| H261 | -0.130067583 | 4.307793579  | 6.901966225  |
| H262 | 1.315153256  | 4.953314456  | 2.709490684  |
| H263 | 2.192795104  | 5.044969900  | -6.263335209 |
| H264 | -0.255653728 | 5.998190878  | 9.646155622  |
| H265 | 3.872237722  | 3.917390494  | -4.327351856 |
| H266 | 2.275593332  | 4.957220515  | 5.637523571  |
| H267 | -2.333489494 | 7.314386406  | 1.474747948  |
| H268 | 1.845339896  | 7.457228850  | -2.787644544 |
| H269 | -1.950120744 | 6.200206092  | 9.156195681  |
| H270 | 3.324792430  | 8.625756458  | 4.668414722  |
| H271 | 0.892921948  | 10.433030292 | 2.928806996  |
| H272 | 5.016588877  | 1.417006539  | -4.841347377 |
| H273 | 2.531618341  | 1.318890060  | -5.924154171 |
| H274 | -4.412769479 | 11.597675005 | 0.005492501  |
| H275 | 1.389006337  | 4.878611841  | -3.060226576 |
| H276 | 0.551154754  | 6.725225615  | 5.304380093  |
| H277 | 3.312102532  | 6.690735374  | 4.227791592  |
| H278 | 2.795311750  | 4.232700258  | 3.321722649  |
| H279 | 1.600347856  | 7.252171349  | 1.806531526  |
| H280 | -6.307406916 | 5.787735964  | 5.248091836  |
| H281 | -3.813729082 | 7.981563011  | 5.417258063  |
| H282 | -5.284468093 | 9.940222188  | 7.021119290  |
| H283 | -5.647901361 | 5.575702300  | 6.882870170  |
| H284 | -5.409592485 | 9.174706504  | 3.739215516  |
| H285 | 8.947651409  | -2.774609835 | 5.047676472  |
| H286 | 8.694369066  | -4.148839505 | 3.952411325  |
| H287 | 5.547096024  | -7.496634355 | 4.967104221  |
| H288 | 10.943722950 | -4.195932101 | 4.761241067  |
| H289 | 11.038253728 | -3.712413228 | 3.198623237  |
| H290 | -2.052550252 | 0.334754577  | 7.425594336  |
| H291 | -4.366823577 | 2.077000487  | 8.529634054  |
| H292 | -0.473597609 | 3.687309116  | 9.447368518  |

|      |              |               |              |
|------|--------------|---------------|--------------|
| H293 | -2.882930196 | 1.665966875   | 6.560937264  |
| H294 | -3.782157674 | 2.053035667   | 10.056307987 |
| H295 | 4.038545002  | 0.719793743   | 7.747833053  |
| H296 | -1.557107031 | 1.786497201   | 9.319377369  |
| H297 | -2.430810737 | -9.378393482  | -1.169542392 |
| H298 | -0.231887247 | -10.828020251 | 0.399402405  |
| H299 | 5.278926370  | 0.515329383   | 5.789255138  |
| H300 | -3.502934126 | -3.678068746  | 2.903069115  |
| H301 | 7.286780996  | 2.931193334   | 4.182250839  |
| H302 | 5.062279370  | 0.017940908   | -0.693717036 |
| H303 | 5.606016945  | 3.076641154   | 3.671001487  |
| H304 | -2.637575227 | -6.802595340  | -0.411064883 |
| H305 | 5.723546971  | 0.376564545   | 3.854302986  |
| H306 | -0.884934487 | -6.718643988  | -0.217393026 |
| H307 | -0.698541796 | -8.984011245  | -1.119843604 |
| H308 | -0.951900638 | -8.600688003  | 1.419428225  |
| H309 | -2.708853948 | -8.745053055  | 1.204301896  |
| H310 | 6.737726927  | 4.148400985   | -2.320625567 |
| H311 | -1.768637144 | -11.704243434 | -2.022367525 |
| H312 | 0.657358543  | -12.696370739 | -3.631871838 |
| H313 | 3.871911829  | 0.595448567   | 1.431837200  |
| H314 | -1.945446460 | -13.941656761 | -3.197731186 |
| H315 | -1.342106976 | -13.222309461 | -4.539793671 |
| H316 | -1.136373182 | -6.057952563  | 2.070738429  |
| H317 | 3.710860459  | 2.929009777   | 2.158353775  |
| H318 | 6.218933656  | 1.804709763   | -1.978491872 |
| H319 | 4.226074167  | -11.787666777 | 1.063518132  |
| H320 | 5.924364816  | -9.056737351  | 2.356917285  |
| H321 | 2.469122863  | -10.172375736 | 0.653111464  |
| H322 | 5.630791194  | -11.596425021 | 0.447279248  |
| H323 | 6.949656394  | 1.005508240   | 8.356450401  |
| H324 | 1.700201129  | -7.750897876  | 2.419174881  |
| H325 | 1.800335082  | -7.253622129  | -2.289339994 |
| H326 | 7.294866751  | -1.619205287  | 4.002546671  |
| H327 | 4.070887637  | -8.452492681  | -2.319381658 |
| H328 | 8.888753599  | -5.351246933  | 1.245452529  |
| H329 | 6.675168063  | -4.210999990  | 0.713343008  |
| H330 | 0.339491380  | -14.188835513 | -2.741676163 |
| H331 | -1.871254426 | -4.280336658  | 3.195198720  |
| H332 | 0.609018685  | -9.755264392  | 3.168764766  |
| H333 | 0.892349997  | -7.185298397  | 3.618685068  |
| H334 | -1.033618889 | -11.343626307 | 2.369665780  |
| H335 | -4.327073798 | -6.045510643  | 0.436355710  |
| H336 | 7.695847225  | -9.631203434  | -2.943143736 |
| H337 | 6.334972488  | -7.403797326  | -0.542106083 |
| H338 | 5.209310671  | -8.662418692  | 0.005494724  |
| H339 | 5.094869304  | -7.015119799  | -2.593240361 |
| H340 | 6.266535198  | -0.907121736  | 1.926926883  |
| H341 | 4.889804179  | 4.745825549   | 0.879169052  |
| H342 | 6.094233079  | 5.422027245   | -1.253634968 |
| H343 | 1.756851694  | -5.647303109  | -1.493666676 |
| H344 | 1.269664696  | -10.925959107 | 2.395150274  |
| H345 | 1.973095492  | -11.623498219 | 0.373859357  |
| H346 | -4.805057916 | -4.589327692  | 1.193340212  |
| H347 | 8.552262448  | -7.544227681  | 2.539381864  |
| H348 | 4.551193761  | -8.001161008  | 2.683582257  |
| H349 | 7.910061587  | -0.638646013  | 1.263027940  |
| H350 | 4.465935227  | 2.442263626   | 7.859813737  |
| H351 | -4.731910769 | -5.576941315  | 4.448041100  |
| H352 | -3.323161646 | -4.939692918  | 5.325907874  |
| H353 | 7.242096570  | -8.900711297  | 5.766089465  |
| H354 | 7.355997045  | -9.736571912  | 4.364281121  |
| H355 | 3.676896493  | -12.439714831 | 3.961167097  |
| H356 | 4.928194009  | -10.673026611 | 3.232650378  |
| H357 | 4.999784885  | -11.980742688 | 6.315850099  |
| H358 | 2.554666379  | -11.218933638 | 4.598774463  |
| H359 | -3.505936870 | -7.004442438  | 7.146566146  |
| H360 | -8.176935615 | 10.775086515  | 3.795599600  |
| H361 | -3.712365547 | -12.716392103 | 2.339203716  |
| H362 | -3.531286670 | -10.329864545 | 3.656109336  |
| H363 | -5.589450398 | 11.820567632  | 2.610329485  |
| H364 | -6.742123636 | 9.146541101   | 1.605932108  |
| H365 | -6.651127158 | 10.650908311  | 0.669972018  |



|       |               |               |               |
|-------|---------------|---------------|---------------|
| H366  | 1.893874109   | -3.046163187  | -0.654200759  |
| H367  | -0.349348243  | 9.625014115   | -0.401277417  |
| H368  | 0.501900021   | -0.556009390  | -0.117854902  |
| H369  | 1.041598929   | 1.265627582   | -1.057330575  |
| Mo370 | 3.602137607   | -5.041808558  | 1.421397016   |
| N371  | -1.148391163  | -2.707370568  | 0.721965677   |
| N372  | -0.026126926  | -2.772515997  | 0.766916984   |
| N373  | 4.036006774   | -0.822136830  | -8.939553166  |
| N374  | 1.545519017   | 1.815416172   | -9.818350511  |
| N375  | -0.908268213  | 0.742843880   | -10.740707776 |
| N376  | -1.064842268  | -1.748165483  | -9.439262152  |
| N377  | -1.194407452  | -0.929292123  | -6.700205663  |
| N378  | -3.695596358  | 0.411801362   | -6.769189998  |
| N379  | -5.553833351  | -1.588151724  | -7.752942855  |
| N380  | -5.079517489  | -4.113793687  | -6.457615200  |
| N381  | -4.781436872  | -3.657836236  | -3.758573747  |
| N382  | -6.278233576  | -1.308402959  | -2.573296849  |
| N383  | -8.737266076  | -1.566853434  | -4.001601288  |
| N384  | -1.396475976  | -13.143057551 | -3.523454961  |
| N385  | -0.998532719  | -11.619566213 | -1.349851260  |
| N386  | -1.955841281  | -6.122160501  | 1.460471189   |
| N387  | -4.039882733  | -5.195478292  | 0.911637156   |
| N388  | -2.757326576  | -4.319252706  | 2.648881754   |
| N389  | -1.956486825  | -11.671839835 | 2.012404668   |
| N390  | 4.392775651   | 2.154313275   | -5.219031473  |
| N391  | 5.123144288   | -2.130838000  | -3.275328483  |
| N392  | 2.851319403   | 4.070111319   | -4.281508475  |
| N393  | 1.596774132   | 5.828912967   | -6.008223927  |
| N394  | -0.917415104  | 4.710140846   | -6.349928013  |
| N395  | -2.281099056  | 4.542235442   | -3.891160492  |
| N396  | 0.344682491   | 4.283827171   | -0.566368027  |
| N397  | 0.636837803   | 2.210103562   | -1.084222126  |
| N398  | -3.721306849  | 6.794325218   | -3.189171533  |
| N399  | -3.070692021  | 11.466799324  | -3.677561001  |
| N400  | -4.935531046  | 12.477987090  | -3.025903910  |
| N401  | -4.539202612  | -4.695448388  | 7.730733078   |
| N402  | -3.636508302  | 1.664590741   | 9.119790001   |
| N403  | -1.194006454  | 4.252948161   | 9.006122880   |
| N404  | -0.092893884  | 5.312456522   | 6.664865264   |
| N405  | 2.045339013   | 7.451107277   | 2.719582142   |
| N406  | 2.460109156   | 9.061377509   | 4.368369311   |
| N407  | 0.830409727   | 9.430940683   | 2.768715705   |
| N408  | -1.784850909  | 4.539039151   | 4.503339821   |
| N409  | -4.221250987  | 5.644331078   | 5.363977260   |
| N410  | -4.671706909  | 8.410011592   | 5.768785881   |
| N411  | -1.580779316  | 9.119935845   | 5.135762346   |
| N412  | -5.672752406  | 10.147837357  | 3.874052091   |
| N413  | 10.733090553  | -3.418906863  | 4.130959415   |
| N414  | 7.859266781   | -1.490022906  | 3.155613080   |
| N415  | 6.412614990   | 1.127903172   | 3.637750259   |
| N416  | 5.403200954   | 1.393070003   | 6.308539412   |
| N417  | 10.541756829  | 1.282512386   | 0.432969281   |
| N418  | 8.571990050   | 3.244845728   | -0.322972799  |
| N419  | 7.159470879   | -8.807037968  | 4.749551455   |
| N420  | 5.795568672   | -5.877942924  | 1.758180056   |
| N421  | 7.983586108   | -5.709841981  | 1.536890122   |
| N422  | 4.540902330   | -10.566359515 | 4.169986160   |
| N423  | -0.827865982  | 1.884155368   | 1.629027217   |
| N424  | -0.190396827  | 1.040099339   | 2.042332398   |
| O425  | 1.331466936   | 0.015673405   | -8.443738024  |
| O426  | -1.916071495  | 1.574866152   | -8.872979374  |
| O427  | -3.324491308  | -1.739486283  | -9.780775334  |
| O428  | -2.450756497  | -2.791950416  | -6.340077644  |
| O429  | -3.914512567  | -0.034840759  | -4.548234422  |
| O430  | -7.052336870  | -0.642109936  | -6.308184673  |
| O431  | -7.245348719  | -4.702450742  | -6.937623148  |
| O432  | -4.551716843  | -5.900989638  | -3.301055084  |
| O433  | -6.696859544  | -2.991648398  | -1.090853544  |
| O434  | -9.754753304  | -1.311171621  | -1.986822609  |
| O435  | -11.578174975 | -3.750490212  | -3.851472017  |
| O436  | 1.088116075   | -12.520380476 | -0.920523044  |
| O437  | -3.372946282  | -11.801302307 | 0.206066310   |
| O438  | -3.806674418  | -11.763139923 | 5.079513894   |

|  |          |                                 |               |               |
|--|----------|---------------------------------|---------------|---------------|
|  | O439     | 0.886512358                     | 2.970364122   | -4.719083645  |
|  | O440     | 5.697261078                     | -0.043710625  | -3.975055603  |
|  | O441     | 0.860234273                     | 7.131516314   | -4.279512579  |
|  | O442     | 2.490896104                     | 7.098425208   | -2.124193066  |
|  | O443     | -1.564769882                    | 6.459390203   | -7.695070179  |
|  | O444     | -4.149927639                    | 3.745455205   | -4.928064890  |
|  | O445     | -4.953238085                    | 5.571839623   | -1.697165950  |
|  | O446     | -6.882014785                    | 8.370296066   | -2.972664659  |
|  | O447     | -5.153324342                    | -7.867766934  | 6.304976715   |
|  | O448     | -6.025897232                    | 0.451906501   | 4.090002246   |
|  | O449     | -3.151857325                    | 4.274564955   | 7.845790549   |
|  | O450     | -0.653148761                    | 7.443561381   | 7.319305711   |
|  | O451     | -1.021931477                    | 6.394646508   | 3.400624489   |
|  | O452     | -4.970692967                    | 5.664547411   | 3.198163477   |
|  | O453     | -4.199045152                    | 2.622650555   | 4.684662045   |
|  | O454     | -6.698403453                    | 7.985803112   | 6.745737942   |
|  | O455     | -5.643002959                    | 11.910342900  | 5.320193941   |
|  | O456     | -2.379596439                    | 11.081506383  | 4.278374307   |
|  | O457     | -8.151658168                    | 12.297000511  | 2.430747295   |
|  | O458     | -0.702474712                    | 8.919826872   | 0.175018011   |
|  | O459     | 9.541260264                     | -2.364530263  | 1.855390985   |
|  | O460     | 8.089877283                     | 1.716789730   | 2.195514611   |
|  | O461     | 5.890185970                     | 3.625441402   | 6.262237834   |
|  | O462     | 5.625043542                     | 1.021807047   | 9.909422436   |
|  | O463     | 9.702305652                     | 3.321105516   | -2.304656108  |
|  | O464     | 8.100190721                     | -2.495644476  | -2.622153889  |
|  | O465     | 8.327858522                     | -2.894689340  | -0.439601234  |
|  | O466     | 7.080862295                     | 6.211412349   | 0.971724345   |
|  | O467     | 4.236886680                     | -9.344832079  | 6.052095759   |
|  | O468     | 3.099029881                     | -12.564439613 | 6.775549694   |
|  | O469     | 3.128744468                     | -4.476223418  | -3.396996659  |
|  | O470     | 3.039104457                     | -6.457440698  | -4.399738208  |
|  | O471     | 6.590855386                     | -10.453927192 | -1.114830571  |
|  | O472     | 7.191448274                     | -8.861828514  | -2.602486494  |
|  | O473     | 3.142146078                     | -7.272008663  | 1.258631577   |
|  | O474     | 2.397591223                     | -8.742381373  | -0.274973503  |
|  | O475     | 4.138622801                     | -5.614894034  | -0.534935357  |
|  | O476     | 0.543616523                     | -10.734859312 | 3.046248542   |
|  | O477     | 0.918797308                     | -7.937656142  | 2.994125827   |
|  | O478     | 0.953213123                     | 6.876834908   | 0.132802573   |
|  | O479     | 5.162730844                     | -12.100563704 | 1.143873250   |
|  | O480     | 2.470755233                     | -11.093603568 | 1.047606820   |
|  | S481     | -0.472375947                    | 1.936864601   | 6.477984946   |
|  | S482     | 2.101106324                     | 1.019111135   | 3.996361033   |
|  | S483     | 4.130658804                     | -2.820863029  | 0.867734064   |
|  | S484     | -1.034918656                    | -0.910647460  | 3.911493449   |
|  | S485     | 1.695701252                     | -0.599724243  | 0.532725325   |
|  | S486     | 4.852232835                     | -1.560357392  | 4.555581295   |
|  | S487     | 1.311227830                     | -5.058035009  | 1.100360046   |
|  | S488     | 1.502651160                     | -1.497564016  | 6.385101975   |
|  | S489     | 3.635411231                     | -4.998126114  | 3.814981583   |
|  | S490     | -0.063786564                    | -4.626319365  | 4.503918106   |
|  | TS       | bm22b2n2x6x6n2necxdr 1 53296.87 |               |               |
|  | S=3/2    |                                 |               |               |
|  | Fe( 139) | 0.537                           | 2.383         |               |
|  | Fe( 140) | 0.384                           | -0.111        |               |
|  | Fe( 141) | 0.572                           | 2.780         |               |
|  | Fe( 142) | 0.531                           | -2.413        |               |
|  | Fe( 143) | 0.552                           | 2.780         |               |
|  | Fe( 144) | 0.499                           | -2.294        |               |
|  | Fe( 145) | 0.329                           | -0.495        |               |
|  | C1       | 2.006418295                     | 0.654925694   | -9.260830283  |
|  | C2       | 3.375539658                     | 0.179006546   | -9.751628505  |
|  | C3       | 0.285442783                     | 2.401983088   | -9.370892129  |
|  | C4       | -0.945632098                    | 1.535988437   | -9.634773788  |
|  | C5       | -2.010132739                    | -0.157656082  | -11.039307915 |
|  | C6       | -2.198250559                    | -1.284150422  | -10.017330077 |
|  | C7       | -1.127306218                    | -2.738424149  | -8.363222175  |
|  | C8       | -1.644053714                    | -2.168956982  | -7.037845413  |
|  | C9       | -1.689275762                    | -0.284424916  | -5.491076016  |
|  | C10      | -3.190768592                    | 0.038031214   | -5.547316491  |
|  | C11      | -5.108496398                    | 0.680048653   | -6.893421150  |
|  | C12      | -5.980035141                    | -0.583058875  | -6.933328801  |
|  | C13      | -6.392812857                    | -2.736351406  | -8.027744794  |
|  | C14      | -6.282268213                    | -3.929383774  | -7.072270742  |
|  | C15      | -4.822850832                    | -5.259805241  | -5.604058779  |
|  | C16      | -4.718357802                    | -4.976284704  | -4.102792150  |
|  | C17      | -4.640661950                    | -3.172309079  | -2.387945576  |
|  | C18      | -5.957068861                    | -2.510557454  | -1.948702999  |
|  | C19      | -3.408646476                    | -2.254117028  | -2.224201941  |

|     |               |               |              |
|-----|---------------|---------------|--------------|
| C20 | -3.484665202  | -1.489837884  | -0.894198678 |
| C21 | -2.123345637  | -3.071598238  | -2.412578904 |
| C22 | -7.435220535  | -0.559433125  | -2.147298169 |
| C23 | -8.733013561  | -1.191250644  | -2.682674901 |
| C24 | -7.276420401  | 0.927886181   | -2.544744814 |
| C25 | -8.552227693  | 1.721316346   | -2.240958546 |
| C26 | -6.076601157  | 1.560643026   | -1.826490762 |
| C27 | -9.926049481  | -2.143416577  | -4.567832893 |
| C28 | -10.420235017 | -3.346869386  | -3.787296706 |
| C29 | -0.052180935  | -13.161576408 | -2.942052741 |
| C30 | 0.058877776   | -12.387512628 | -1.624546558 |
| C31 | -1.187802646  | -10.802129769 | -0.148312272 |
| C32 | -2.287469712  | -11.457755548 | 0.711441183  |
| C33 | -1.543906488  | -9.353583054  | -0.526780767 |
| C34 | -1.764145106  | -8.451300905  | 0.688097535  |
| C35 | -1.809726143  | -6.975789506  | 0.290610569  |
| C36 | -2.925938669  | -5.216603055  | 1.687679262  |
| C37 | -2.860928407  | -12.321428932 | 2.934058213  |
| C38 | -3.449062523  | -11.398197832 | 3.979772800  |
| C39 | 2.981792699   | 1.762212306   | -5.019422887 |
| C40 | 2.124558565   | 2.985617838   | -4.660196698 |
| C41 | 2.831190939   | 0.743069131   | -3.862487890 |
| C42 | 3.350748145   | -0.683707267  | -4.133741066 |
| C43 | 4.818041197   | -0.916074297  | -3.781181330 |
| C44 | 2.212193479   | 5.238810481   | -3.692914068 |
| C45 | 1.519162922   | 6.165940354   | -4.702342878 |
| C46 | 3.177308773   | 6.039196144   | -2.796247938 |
| C47 | 0.726146555   | 6.432119667   | -7.002865462 |
| C48 | -0.700349300  | 5.864545539   | -7.038012308 |
| C49 | -2.224590708  | 4.075006184   | -6.318738778 |
| C50 | -2.967497623  | 4.101867442   | -4.982576831 |
| C51 | -2.920705004  | 4.560390527   | -2.573075129 |
| C52 | -3.997094010  | 5.670385666   | -2.474181433 |
| C53 | -1.921984500  | 4.855361775   | -1.444803246 |
| C54 | -0.792398471  | 3.893420553   | -1.260172985 |
| C55 | -0.596652215  | 2.576268721   | -1.597888365 |
| C56 | 1.183038418   | 3.248477936   | -0.442602091 |
| C57 | -4.465504875  | 8.029425652   | -3.053956147 |
| C58 | -5.913127613  | 7.801989581   | -3.483873364 |
| C59 | -3.782053529  | 9.092869181   | -3.943596919 |
| C60 | -4.071000435  | 10.524859534  | -3.600192189 |
| C61 | -5.240442632  | 11.139702469  | -3.196747777 |
| C62 | -3.592740982  | 12.616731747  | -3.319332915 |
| C63 | -5.014116733  | -5.465788086  | 6.536593608  |
| C64 | -4.519524895  | -6.895784391  | 6.651636998  |
| C65 | -4.415797373  | -4.897337541  | 5.229618215  |
| C66 | -4.869300900  | -3.487163238  | 4.930518180  |
| C67 | -6.052727416  | -3.239415804  | 4.209581253  |
| C68 | -4.108837748  | -2.381123412  | 5.347004377  |
| C69 | -6.465136483  | -1.935389218  | 3.915084896  |
| C70 | -4.509949015  | -1.074784035  | 5.066843069  |
| C71 | -5.690330185  | -0.853148567  | 4.350663715  |
| C72 | -2.328488378  | 2.110374233   | 8.604805472  |
| C73 | -2.262926724  | 3.633618429   | 8.434626025  |
| C74 | -2.064820876  | 1.409050533   | 7.263031311  |
| C75 | -1.006202084  | 5.688852418   | 8.909882435  |
| C76 | -0.568377854  | 6.220256912   | 7.543914941  |
| C77 | 0.287716326   | 5.662303700   | 5.297844404  |
| C78 | -0.895372098  | 5.556761932   | 4.310990357  |
| C79 | 1.497740616   | 4.809951623   | 4.877208645  |
| C80 | 2.084491710   | 5.057284077   | 3.484439455  |
| C81 | 2.858795582   | 6.372094034   | 3.272435675  |
| C82 | 1.809038949   | 8.644467332   | 3.265348701  |
| C83 | -2.940851587  | 4.418444683   | 3.627722538  |
| C84 | -4.127086676  | 5.313582882   | 4.038423172  |
| C85 | -3.451434228  | 2.975241268   | 3.506238962  |
| C86 | -5.492594399  | 6.082862667   | 5.916872056  |
| C87 | -5.663334782  | 7.572001148   | 6.199914026  |
| C88 | -4.679538692  | 9.825894315   | 6.114070012  |
| C89 | -5.381402871  | 10.723358967  | 5.071766937  |
| C90 | -3.256384941  | 10.347772148  | 6.409374793  |
| C91 | -2.351992083  | 10.242146823  | 5.186778993  |
| C92 | -6.201650052  | 10.910751796  | 2.760916961  |

|       |              |               |               |
|-------|--------------|---------------|---------------|
| C93   | -7.628231870 | 11.377250439  | 3.029876814   |
| C94   | -6.157634118 | 10.057340914  | 1.466963633   |
| C95   | -4.742187012 | 9.721189780   | 1.054003406   |
| C96   | -3.976570055 | 10.651236586  | 0.332354010   |
| C97   | -4.139975293 | 8.504292303   | 1.416185771   |
| C98   | -2.645062127 | 10.390945837  | 0.001152392   |
| C99   | -2.801748841 | 8.234798110   | 1.111918045   |
| C100  | -2.067015235 | 9.189231622   | 0.412152286   |
| C101  | 9.293919526  | -3.209295525  | 4.096511681   |
| C102  | 8.916566519  | -2.300224342  | 2.941091827   |
| C103  | 7.301069007  | -0.578052511  | 2.167844427   |
| C104  | 7.305495000  | 0.873534786   | 2.662292664   |
| C105  | 6.321261708  | 2.452078863   | 4.251741883   |
| C106  | 5.851916422  | 2.531666359   | 5.700012883   |
| C107  | 4.872706130  | 1.451085275   | 7.664319272   |
| C108  | 5.910240752  | 1.120037585   | 8.721776749   |
| C109  | 10.021928174 | 1.356499326   | -0.948587513  |
| C110  | 9.427277895  | 2.735241633   | -1.263991387  |
| C111  | 9.019984104  | 0.251746460   | -1.357588108  |
| C112  | 9.700933334  | -1.127450854  | -1.415839906  |
| C113  | 8.669727665  | -2.224973957  | -1.564782356  |
| C114  | 7.917401666  | 4.528289767   | -0.559906503  |
| C115  | 7.906007891  | 5.346298209   | 0.716882890   |
| C116  | 6.545537573  | 4.423602954   | -1.273136068  |
| C117  | 5.660650503  | 3.395680439   | -0.622286189  |
| C118  | 4.905419823  | 3.712990044   | 0.519269374   |
| C119  | 5.687430244  | 2.062010581   | -1.064635369  |
| C120  | 4.255877707  | 2.702505501   | 1.236323294   |
| C121  | 5.036468102  | 1.053722462   | -0.349190117  |
| C122  | 4.344246112  | 1.370672775   | 0.823166274   |
| C123  | 5.775123572  | -8.424370336  | 4.417208613   |
| C124  | 4.764169021  | -9.461908232  | 4.934085731   |
| C125  | 5.624340918  | -8.156450262  | 2.911179073   |
| C126  | 6.405560063  | -7.001676949  | 2.357108770   |
| C127  | 7.776474122  | -6.909922418  | 2.215821524   |
| C128  | 6.818995156  | -5.146967108  | 1.275895548   |
| C129  | 3.586218382  | -11.569874650 | 4.634563406   |
| C130  | 3.913551390  | -12.063774187 | 6.026471105   |
| C131  | 2.866178832  | -5.662280313  | -3.285605123  |
| C132  | 2.388530032  | -6.355986465  | -2.040102657  |
| C133  | 3.561443049  | -6.761699808  | -1.062981240  |
| C134  | 4.599670126  | -7.638995548  | -1.821475437  |
| C135  | 5.666670284  | -8.231123584  | -0.882821396  |
| C136  | 6.506686013  | -9.302436630  | -1.515947370  |
| C137  | 2.941830888  | -7.676501092  | 0.039248903   |
| C138  | 1.877096240  | -2.241435186  | 3.144892931   |
| Fe139 | 3.756171094  | -2.871669743  | 3.089609822   |
| Fe140 | 0.788934005  | -0.364581922  | 2.686023637   |
| Fe141 | 0.497400408  | -2.473044720  | 4.548018460   |
| Fe142 | 2.661303467  | -1.074795451  | 4.507007678   |
| Fe143 | 0.446922008  | 0.197891216   | 5.244542886   |
| Fe144 | 1.612596895  | -4.264493354  | 3.149553332   |
| Fe145 | 1.928056900  | -2.834302424  | 0.949528922   |
| H146  | 3.385638344  | -1.593604767  | -8.741804512  |
| H147  | 4.275895139  | -0.430966839  | -8.018453773  |
| H148  | 2.162078935  | 2.364822891   | -10.394576561 |
| H149  | 4.041373022  | 1.046934882   | -9.876949047  |
| H150  | 3.217048774  | -0.231345157  | -10.764018534 |
| H151  | 0.295680210  | 2.596155438   | -8.288372519  |
| H152  | -0.079041823 | 0.750535882   | -11.321317662 |
| H153  | 0.153015914  | 3.360241090   | -9.891489173  |
| H154  | -1.829800535 | -0.602766901  | -12.026827803 |
| H155  | -0.193570024 | -1.251518728  | -9.574404145  |
| H156  | -2.956544503 | 0.396849885   | -11.078469473 |
| H157  | -1.538992999 | -0.925130499  | -4.611950824  |
| H158  | -0.469684455 | -0.479704418  | -7.256091962  |
| H159  | -0.121767078 | -3.155480029  | -8.213091599  |
| H160  | -5.457330868 | 1.291325654   | -6.051358120  |
| H161  | -3.056232082 | 0.577444736   | -7.540654641  |
| H162  | -1.801336266 | -3.556304027  | -8.645614473  |
| H163  | -1.117982621 | 0.643273937   | -5.341170728  |
| H164  | -4.715669241 | -1.450784886  | -8.325108517  |
| H165  | -5.262620584 | 1.241900541   | -7.824889386  |

|      |               |               |              |
|------|---------------|---------------|--------------|
| H166 | -2.105730594  | -3.530034137  | -3.411528491 |
| H167 | -1.232593363  | -2.432196627  | -2.317215301 |
| H168 | -2.038118334  | -3.876911602  | -1.669603473 |
| H169 | -3.439343235  | -1.505570404  | -3.031562934 |
| H170 | -6.152078581  | -3.100618342  | -9.036840454 |
| H171 | -5.126835312  | 1.071447055   | -2.082985632 |
| H172 | -7.943172471  | -1.347305194  | -4.600626913 |
| H173 | -9.418148773  | 1.349096756   | -2.806984265 |
| H174 | -2.564255553  | -0.910422521  | -0.725400573 |
| H175 | -3.610362648  | -2.172185454  | -0.044384001 |
| H176 | -6.114742298  | -5.506884225  | 6.415090183  |
| H177 | -5.986027732  | 2.620905775   | -2.104944800 |
| H178 | -8.402400048  | 2.779354477   | -2.504469525 |
| H179 | -6.209698241  | 1.507052536   | -0.733105898 |
| H180 | -8.799153302  | 1.669488106   | -1.168380519 |
| H181 | -7.096059484  | 0.966193777   | -3.633989024 |
| H182 | -7.522479274  | -0.627778151  | -1.051121835 |
| H183 | -5.589734191  | -0.896615781  | -3.190681072 |
| H184 | -4.329375698  | -0.787040408  | -0.881996289 |
| H185 | -2.591133438  | 2.307606269   | 3.337321778  |
| H186 | -4.105075407  | 2.939069401   | 2.619677873  |
| H187 | -4.784759704  | 1.882096291   | 4.438165523  |
| H188 | -6.846639012  | 0.484905131   | 3.544897976  |
| H189 | -3.893410540  | -0.229579135  | 5.374162370  |
| H190 | -3.161074934  | -2.539946494  | 5.864640014  |
| H191 | -6.659731980  | -4.079655788  | 3.859155197  |
| H192 | -4.830721639  | -2.986947678  | -4.511575737 |
| H193 | -3.882409372  | -5.743896824  | -5.908689899 |
| H194 | -5.638810598  | -5.980886677  | -5.745663422 |
| H195 | -4.280883021  | -3.513811790  | -6.693155205 |
| H196 | -7.446920379  | -2.430988964  | -8.019900245 |
| H197 | -7.379010389  | -1.764104354  | 3.340854621  |
| H198 | -4.528969650  | -4.059575626  | -1.750644806 |
| H199 | -10.747818448 | -1.413312045  | -4.656887981 |
| H200 | -9.674948276  | -2.493661307  | -5.581209081 |
| H201 | -9.634613788  | -3.893312595  | -3.215350038 |
| H202 | -2.362565754  | -13.166501934 | 3.431403467  |
| H203 | 6.095867347   | -2.331363786  | -3.034425389 |
| H204 | 2.790349560   | -7.371487652  | -4.174606616 |
| H205 | 10.370180710  | -1.164464087  | -2.288907016 |
| H206 | 10.304050662  | -1.293481420  | -0.510535101 |
| H207 | 8.589750670   | 0.477770015   | -2.346042890 |
| H208 | 8.762085635   | 5.140366158   | 1.401437613  |
| H209 | 10.886152909  | 1.286464344   | -1.626735230 |
| H210 | 3.325146926   | 1.157784612   | -2.967717610 |
| H211 | 3.221913627   | -0.937209424  | -5.200815094 |
| H212 | 8.342303708   | 2.713595455   | 0.505206195  |
| H213 | 8.591906214   | 5.091842024   | -1.233465386 |
| H214 | 9.785815305   | 1.212074956   | 1.108140145  |
| H215 | 4.410383873   | -2.837988334  | -3.095290969 |
| H216 | 8.183319496   | 0.246641243   | -0.643637363 |
| H217 | 11.143624304  | 0.476337721   | 0.529265556  |
| H218 | 4.578989504   | 2.274753492   | -6.223595219 |
| H219 | 1.755730504   | 0.670636457   | -3.639362558 |
| H220 | 8.848589203   | -2.578387913  | 0.363816333  |
| H221 | 2.727253742   | -1.400510247  | -3.579644364 |
| H222 | -3.442304647  | 3.609304727   | -2.396502154 |
| H223 | -1.220966304  | 1.875791007   | -2.141763842 |
| H224 | -2.863078017  | 4.591219915   | -7.047588797 |
| H225 | -0.137272703  | 4.223371282   | -5.886841566 |
| H226 | -2.931259751  | 6.755602274   | -3.843814195 |
| H227 | -6.238345247  | 10.759467519  | -3.005382943 |
| H228 | -6.030724019  | 7.069047527   | -4.318506605 |
| H229 | -4.018386034  | 8.883449250   | -5.002638414 |
| H230 | -4.461535913  | 8.352130883   | -2.001147286 |
| H231 | -3.082108156  | 13.574625886  | -3.262881891 |
| H232 | -2.503887702  | 4.893522476   | -0.509889185 |
| H233 | -1.503518311  | 5.863474884   | -1.593923859 |
| H234 | -5.549200684  | 13.200674059  | -2.715438395 |
| H235 | -2.693403974  | 8.962104952   | -3.839796204 |
| H236 | -1.267267055  | 4.657826457   | -3.951499906 |
| H237 | -2.152792842  | 3.026915793   | -6.644370051 |
| H238 | 0.639999889   | 7.509551304   | -6.817042573 |

|      |              |               |              |
|------|--------------|---------------|--------------|
| H239 | 2.144803406  | 3.236326648   | 0.065066637  |
| H240 | 1.176591502  | 6.296105649   | -7.995157286 |
| H241 | -5.132679845 | -4.932164639  | 8.511658574  |
| H242 | -4.703850931 | -3.701470651  | 7.524382604  |
| H243 | -1.528735048 | 3.755698201   | 5.131960448  |
| H244 | -2.642838474 | 4.753527118   | 2.623752581  |
| H245 | -3.603553468 | 5.145538717   | 6.016147678  |
| H246 | 0.514337525  | 5.256848723   | -0.187528653 |
| H247 | 1.572869097  | 7.015508280   | -0.629010113 |
| H248 | 0.216313147  | 7.539340113   | 0.016634034  |
| H249 | 3.600727496  | 5.373686407   | -2.031805562 |
| H250 | 4.004718774  | 6.446930169   | -3.400655576 |
| H251 | -2.853608572 | 9.783317710   | 7.262712739  |
| H252 | -3.339501869 | 11.405606551  | 6.690100203  |
| H253 | -1.362945797 | 8.540545449   | 5.950426589  |
| H254 | -1.002985794 | 8.992370621   | 4.301339541  |
| H255 | 2.232559961  | 9.956203428   | 4.784601548  |
| H256 | 3.690195863  | 6.204933855   | 2.571688447  |
| H257 | -2.065432546 | 11.119789547  | -0.571604699 |
| H258 | -4.711463651 | 7.735877506   | 1.943933779  |
| H259 | 0.329780517  | 9.156372381   | 1.923289508  |
| H260 | 1.216608174  | 3.746185111   | 4.934551586  |
| H261 | -0.122103182 | 4.310297649   | 6.903148229  |
| H262 | 1.306591284  | 4.957151708   | 2.710872626  |
| H263 | 2.186245730  | 5.042805771   | -6.258240265 |
| H264 | -0.253085249 | 5.997269459   | 9.646711441  |
| H265 | 3.862081089  | 3.921662991   | -4.328600325 |
| H266 | 2.285781100  | 4.966739696   | 5.631489016  |
| H267 | -2.332154979 | 7.309914797   | 1.453076228  |
| H268 | 1.844164309  | 7.463469927   | -2.786179930 |
| H269 | -1.946224258 | 6.202001786   | 9.153228941  |
| H270 | 3.336699359  | 8.626603446   | 4.651679280  |
| H271 | 0.904193654  | 10.442504950  | 2.918038108  |
| H272 | 5.002522696  | 1.420711078   | -4.849029287 |
| H273 | 2.509438458  | 1.318447336   | -5.917142232 |
| H274 | -4.425086339 | 11.598557502  | 0.021030467  |
| H275 | 1.381361862  | 4.888101905   | -3.057264345 |
| H276 | 0.556887816  | 6.727175631   | 5.304488284  |
| H277 | 3.310494782  | 6.692077721   | 4.219501114  |
| H278 | 2.792009209  | 4.234713901   | 3.310648311  |
| H279 | 1.584732301  | 7.253761623   | 1.809339037  |
| H280 | -6.305154447 | 5.801513974   | 5.229951196  |
| H281 | -3.812714068 | 7.980631006   | 5.412343875  |
| H282 | -5.278701052 | 9.934091795   | 7.028978293  |
| H283 | -5.661060443 | 5.560167850   | 6.868233807  |
| H284 | -5.409040759 | 9.173870886   | 3.744573426  |
| H285 | 8.960250515  | -2.770204150  | 5.046840105  |
| H286 | 8.712317175  | -4.142519172  | 3.949675748  |
| H287 | 5.547785066  | -7.499684624  | 4.966716035  |
| H288 | 10.962006616 | -4.181495994  | 4.758944537  |
| H289 | 11.052542324 | -3.697133951  | 3.197281671  |
| H290 | -2.041521091 | 0.325830735   | 7.442435692  |
| H291 | -4.364723109 | 2.085901446   | 8.524488270  |
| H292 | -0.476175301 | 3.688660294   | 9.453210199  |
| H293 | -2.884197319 | 1.643494191   | 6.567725356  |
| H294 | -3.782620437 | 2.072271318   | 10.052363230 |
| H295 | 4.028554240  | 0.750722329   | 7.757649859  |
| H296 | -1.557795802 | 1.793844112   | 9.325061533  |
| H297 | -2.441358595 | -9.361027640  | -1.167878312 |
| H298 | -0.235609664 | -10.806120613 | 0.396659823  |
| H299 | 5.278167174  | 0.529450907   | 5.794280099  |
| H300 | -3.502446571 | -3.655005041  | 2.886535851  |
| H301 | 7.310288900  | 2.928396785   | 4.208466942  |
| H302 | 5.071093621  | 0.017430851   | -0.693026155 |
| H303 | 5.641062131  | 3.095544779   | 3.668822483  |
| H304 | -2.625301697 | -6.774932997  | -0.417462116 |
| H305 | 5.735108427  | 0.384501893   | 3.866155522  |
| H306 | -0.872334446 | -6.695447537  | -0.216638862 |
| H307 | -0.707200055 | -8.968885078  | -1.133000443 |
| H308 | -0.941787964 | -8.580745163  | 1.408699666  |
| H309 | -2.700218280 | -8.717916086  | 1.205037069  |
| H310 | 6.736466535  | 4.155081904   | -2.322583881 |
| H311 | -1.772939328 | -11.689912344 | -2.022496053 |

|       |              |               |               |
|-------|--------------|---------------|---------------|
| H312  | 0.652279510  | -12.676538378 | -3.636147873  |
| H313  | 3.866155035  | 0.596286127   | 1.420203756   |
| H314  | -1.945754667 | -13.930268600 | -3.192035388  |
| H315  | -1.345850950 | -13.218578428 | -4.539907252  |
| H316  | -1.127295431 | -6.032428859  | 2.066747789   |
| H317  | 3.683610748  | 2.930756802   | 2.136547638   |
| H318  | 6.236708760  | 1.804706564   | -1.971142311  |
| H319  | 4.219176076  | -11.780867200 | 1.063171097   |
| H320  | 5.931402658  | -9.065071310  | 2.360991289   |
| H321  | 2.462697822  | -10.168674907 | 0.654158379   |
| H322  | 5.624995750  | -11.592820465 | 0.446717837   |
| H323  | 6.957868245  | 1.016914114   | 8.347322798   |
| H324  | 1.702124841  | -7.738681564  | 2.407400180   |
| H325  | 1.797454226  | -7.250326925  | -2.286991559  |
| H326  | 7.323269275  | -1.598475616  | 4.016499949   |
| H327  | 4.059816800  | -8.459336624  | -2.320390119  |
| H328  | 8.921507137  | -5.386223802  | 1.238701623   |
| H329  | 6.714139281  | -4.225783826  | 0.717976422   |
| H330  | 0.345651103  | -14.172346366 | -2.746275747  |
| H331  | -1.866760890 | -4.250105530  | 3.179816146   |
| H332  | 0.609143538  | -9.745970592  | 3.169445805   |
| H333  | 0.901577924  | -7.168940033  | 3.612220332   |
| H334  | -1.035413254 | -11.323704138 | 2.369173937   |
| H335  | -4.346275204 | -6.047665930  | 0.461482007   |
| H336  | 7.703711645  | -9.629085192  | -2.944320884  |
| H337  | 6.322791714  | -7.419051469  | -0.535823466  |
| H338  | 5.199679159  | -8.685005834  | -0.001763509  |
| H339  | 5.089300509  | -7.025743714  | -2.591959723  |
| H340  | 6.275098245  | -0.905839914  | 1.937364313   |
| H341  | 4.867364522  | 4.750647408   | 0.862119590   |
| H342  | 6.090160994  | 5.425329478   | -1.252735122  |
| H343  | 1.762251976  | -5.646837422  | -1.482532154  |
| H344  | 1.266390817  | -10.917692068 | 2.393014764   |
| H345  | 1.969956619  | -11.618955806 | 0.378008348   |
| H346  | -4.782435902 | -4.543285593  | 1.151863338   |
| H347  | 8.572682402  | -7.575136632  | 2.531598746   |
| H348  | 4.565391079  | -7.995137275  | 2.678677212   |
| H349  | 7.914861837  | -0.630516660  | 1.266654872   |
| H350  | 4.492904696  | 2.463940789   | 7.873673685   |
| H351  | -4.712909924 | -5.569181791  | 4.410358911   |
| H352  | -3.317715392 | -4.931265673  | 5.306290037   |
| H353  | 7.232217295  | -8.906766589  | 5.780286390   |
| H354  | 7.354215415  | -9.746344087  | 4.381682681   |
| H355  | 3.655793160  | -12.435116997 | 3.955672697   |
| H356  | 4.918978832  | -10.674686869 | 3.234121608   |
| H357  | 4.988148745  | -11.974873143 | 6.317795829   |
| H358  | 2.544726122  | -11.212477055 | 4.605770218   |
| H359  | -3.511522003 | -6.998604291  | 7.120062548   |
| H360  | -8.186720488 | 10.784143046  | 3.792244055   |
| H361  | -3.704698342 | -12.716320592 | 2.341676382   |
| H362  | -3.540058074 | -10.327801739 | 3.674071798   |
| H363  | -5.586376105 | 11.813753076  | 2.615688587   |
| H364  | -6.744009281 | 9.137666383   | 1.621096776   |
| H365  | -6.657700110 | 10.637898091  | 0.678322038   |
| H366  | 1.815428654  | -3.014559643  | -0.561806582  |
| H367  | -0.358111701 | 9.630662998   | -0.418375759  |
| H368  | 0.560234022  | -0.606777162  | -0.172297566  |
| H369  | 1.042159795  | 1.269264719   | -1.065313681  |
| Mo370 | 3.578983732  | -5.053847661  | 1.427662541   |
| N371  | -1.528295206 | -2.950908448  | 0.634205554   |
| N372  | -0.466440488 | -2.666805571  | 0.773390799   |
| N373  | 4.033745747  | -0.824552109  | -8.931064452  |
| N374  | 1.542190156  | 1.812178701   | -9.808724615  |
| N375  | -0.906289142 | 0.737523585   | -10.729936987 |
| N376  | -1.068142747 | -1.755065399  | -9.433356463  |
| N377  | -1.186967862 | -0.937747201  | -6.691584054  |
| N378  | -3.686059796 | 0.408807494   | -6.753218502  |
| N379  | -5.552144670 | -1.581877465  | -7.750468125  |
| N380  | -5.080274741 | -4.109250001  | -6.454788179  |
| N381  | -4.763140520 | -3.665303275  | -3.755761297  |
| N382  | -6.263733097 | -1.329901050  | -2.558076000  |
| N383  | -8.728396974 | -1.570476719  | -3.985989104  |
| N384  | -1.398287983 | -13.133859367 | -3.524383466  |

|      |               |               |              |
|------|---------------|---------------|--------------|
| N385 | -1.002935204  | -11.605048069 | -1.349835122 |
| N386 | -1.948301091  | -6.103987689  | 1.458656567  |
| N387 | -4.038649117  | -5.192231015  | 0.913233718  |
| N388 | -2.768381399  | -4.319902047  | 2.660799217  |
| N389 | -1.960002946  | -11.650750265 | 2.013885744  |
| N390 | 4.378000615   | 2.156155233   | -5.228950749 |
| N391 | 5.119130394   | -2.121814343  | -3.264624285 |
| N392 | 2.842340367   | 4.073376116   | -4.275230281 |
| N393 | 1.594397516   | 5.831417685   | -6.006434808 |
| N394 | -0.915884307  | 4.704782398   | -6.350108586 |
| N395 | -2.273628652  | 4.531242642   | -3.881018383 |
| N396 | 0.336869844   | 4.281106230   | -0.549332195 |
| N397 | 0.635550112   | 2.213770805   | -1.089296442 |
| N398 | -3.715986095  | 6.785587216   | -3.196442522 |
| N399 | -3.049264701  | 11.457984657  | -3.673650578 |
| N400 | -4.914275527  | 12.467963347  | -3.020750250 |
| N401 | -4.558454162  | -4.699830355  | 7.697469386  |
| N402 | -3.636439096  | 1.675413241   | 9.119141860  |
| N403 | -1.189814439  | 4.254522380   | 9.001073273  |
| N404 | -0.085025986  | 5.314578025   | 6.665411203  |
| N405 | 2.035481229   | 7.453124413   | 2.719238480  |
| N406 | 2.473608934   | 9.068992988   | 4.355352857  |
| N407 | 0.831835557   | 9.439544151   | 2.767188807  |
| N408 | -1.778345930  | 4.540089703   | 4.503946619  |
| N409 | -4.222116505  | 5.636598347   | 5.361450573  |
| N410 | -4.668164464  | 8.406177724   | 5.773249346  |
| N411 | -1.572638935  | 9.128635911   | 5.135097720  |
| N412 | -5.681239069  | 10.143669454  | 3.883851011  |
| N413 | 10.747143756  | -3.405198246  | 4.129570621  |
| N414 | 7.875251324   | -1.476060610  | 3.161439927  |
| N415 | 6.423642856   | 1.136043585   | 3.647320666  |
| N416 | 5.398168397   | 1.408484118   | 6.311247038  |
| N417 | 10.545908441  | 1.299032889   | 0.422174118  |
| N418 | 8.579245363   | 3.256079400   | -0.333025277 |
| N419 | 7.156349587   | -8.815281584  | 4.762886988  |
| N420 | 5.822854570   | -5.879495239  | 1.767465412  |
| N421 | 8.014315518   | -5.735792023  | 1.534288456  |
| N422 | 4.531723401   | -10.567419293 | 4.171342524  |
| N423 | -0.844073134  | 1.817793454   | 1.596942151  |
| N424 | -0.225580039  | 0.962961759   | 2.015576824  |
| O425 | 1.323624691   | 0.002798075   | -8.447937648 |
| O426 | -1.926804857  | 1.584604234   | -8.875376877 |
| O427 | -3.327884374  | -1.742669198  | -9.779420480 |
| O428 | -2.448142241  | -2.797387010  | -6.330287233 |
| O429 | -3.899000150  | -0.037999890  | -4.531915293 |
| O430 | -7.038003367  | -0.649093255  | -6.285516315 |
| O431 | -7.247871644  | -4.692288362  | -6.932579285 |
| O432 | -4.578223445  | -5.913187781  | -3.303318267 |
| O433 | -6.683129269  | -3.024189606  | -1.086659600 |
| O434 | -9.729674514  | -1.349701245  | -1.958574762 |
| O435 | -11.577792304 | -3.737486101  | -3.822803614 |
| O436 | 1.087860793   | -12.501718074 | -0.925319249 |
| O437 | -3.378531387  | -11.778241336 | 0.208252731  |
| O438 | -3.818997793  | -11.778490822 | 5.078967021  |
| O439 | 0.875937714   | 2.975153190   | -4.705269151 |
| O440 | 5.690369514   | -0.040020322  | -3.982180977 |
| O441 | 0.867689548   | 7.144795766   | -4.280782787 |
| O442 | 2.487821291   | 7.104011025   | -2.120155781 |
| O443 | -1.568827494  | 6.457982444   | -7.686927432 |
| O444 | -4.151708597  | 3.765183523   | -4.922137259 |
| O445 | -4.957968188  | 5.569801217   | -1.706388785 |
| O446 | -6.871531667  | 8.379500745   | -2.999616442 |
| O447 | -5.138088357  | -7.869590564  | 6.245755573  |
| O448 | -6.035683823  | 0.457339364   | 4.085481759  |
| O449 | -3.141399285  | 4.274863163   | 7.828997276  |
| O450 | -0.645773745  | 7.446105143   | 7.319045018  |
| O451 | -1.015789646  | 6.395394291   | 3.400445266  |
| O452 | -4.961701240  | 5.662888966   | 3.191852029  |
| O453 | -4.174815137  | 2.607532518   | 4.684412856  |
| O454 | -6.684085442  | 7.976619028   | 6.771195277  |
| O455 | -5.654177946  | 11.902998170  | 5.330974629  |
| O456 | -2.395175052  | 11.075095556  | 4.267661361  |
| O457 | -8.142222069  | 12.309753819  | 2.434503340  |



|  |                             |               |               |               |
|--|-----------------------------|---------------|---------------|---------------|
|  | O458                        | -0.709235636  | 8.923925091   | 0.157186547   |
|  | O459                        | 9.543813256   | -2.363294846  | 1.852649881   |
|  | O460                        | 8.088243914   | 1.728128265   | 2.191382976   |
|  | O461                        | 5.885373978   | 3.640146132   | 6.261892662   |
|  | O462                        | 5.636580774   | 0.977390571   | 9.902512117   |
|  | O463                        | 9.694792996   | 3.325709162   | -2.324419112  |
|  | O464                        | 8.112373913   | -2.488188212  | -2.627412554  |
|  | O465                        | 8.335433655   | -2.894956612  | -0.445139050  |
|  | O466                        | 7.074119414   | 6.201081375   | 0.985328726   |
|  | O467                        | 4.229073782   | -9.341136877  | 6.051622821   |
|  | O468                        | 3.093622281   | -12.592992384 | 6.763648124   |
|  | O469                        | 3.124127939   | -4.472252387  | -3.391320758  |
|  | O470                        | 3.038243194   | -6.453200248  | -4.394852622  |
|  | O471                        | 6.597494172   | -10.462706463 | -1.121475493  |
|  | O472                        | 7.192751500   | -8.863832371  | -2.604010185  |
|  | O473                        | 3.103939639   | -7.271451041  | 1.257236592   |
|  | O474                        | 2.387306634   | -8.754110355  | -0.280477552  |
|  | O475                        | 4.138936854   | -5.631296436  | -0.521534866  |
|  | O476                        | 0.540060243   | -10.726140645 | 3.043839394   |
|  | O477                        | 0.932754739   | -7.931778716  | 2.999590313   |
|  | O478                        | 0.943967643   | 6.878638427   | 0.132247884   |
|  | O479                        | 5.154752151   | -12.099199294 | 1.140433232   |
|  | O480                        | 2.468729654   | -11.087738494 | 1.050857806   |
|  | S481                        | -0.478111766  | 1.928150561   | 6.459920446   |
|  | S482                        | 2.089489564   | 1.007080075   | 3.923684323   |
|  | S483                        | 4.167472843   | -2.823735935  | 0.880888867   |
|  | S484                        | -1.050572488  | -0.946891165  | 3.942095859   |
|  | S485                        | 1.723813484   | -0.584020887  | 0.557043139   |
|  | S486                        | 4.840472070   | -1.554115644  | 4.545853533   |
|  | S487                        | 1.285733436   | -4.958460757  | 1.026628482   |
|  | S488                        | 1.501644414   | -1.478541286  | 6.368072530   |
|  | S489                        | 3.610360565   | -4.997629224  | 3.813438859   |
|  | S490                        | -0.094486684  | -4.633734725  | 4.489662321   |
|  | dissociated                 |               |               |               |
|  | S=3/2                       |               |               |               |
|  | Fe( 139)                    | 0.537         | 2.406         |               |
|  | Fe( 140)                    | 0.404         | 0.624         |               |
|  | Fe( 141)                    | 0.576         | 2.784         |               |
|  | Fe( 142)                    | 0.528         | -2.434        |               |
|  | Fe( 143)                    | 0.570         | 2.855         |               |
|  | Fe( 144)                    | 0.506         | -2.261        |               |
|  | Fe( 145)                    | 0.363         | -1.419        |               |
|  | bm22b2n2x6x6n2ncnxdtq.car_3 |               |               |               |
|  | C1                          | 2.011150050   | 0.664189178   | -9.279239133  |
|  | C2                          | 3.374011640   | 0.177537051   | -9.778373868  |
|  | C3                          | 0.292269400   | 2.409396426   | -9.391389144  |
|  | C4                          | -0.940401765  | 1.543076389   | -9.649368800  |
|  | C5                          | -2.017682969  | -0.145004268  | -11.049330360 |
|  | C6                          | -2.197193346  | -1.271766766  | -10.025679180 |
|  | C7                          | -1.118610854  | -2.721722035  | -8.372872573  |
|  | C8                          | -1.648153813  | -2.154067237  | -7.053418453  |
|  | C9                          | -1.715531916  | -0.262362708  | -5.514927048  |
|  | C10                         | -3.218039479  | 0.055089158   | -5.580818843  |
|  | C11                         | -5.130900193  | 0.681510228   | -6.936774189  |
|  | C12                         | -5.999946581  | -0.584019592  | -6.966158578  |
|  | C13                         | -6.393906570  | -2.754954025  | -8.031844699  |
|  | C14                         | -6.278695583  | -3.946955219  | -7.075372648  |
|  | C15                         | -4.820080142  | -5.260986437  | -5.591128897  |
|  | C16                         | -4.711766471  | -4.965344441  | -4.091427019  |
|  | C17                         | -4.660817862  | -3.135944226  | -2.394773704  |
|  | C18                         | -5.977899518  | -2.464616233  | -1.963368207  |
|  | C19                         | -3.430121014  | -2.213142511  | -2.260164193  |
|  | C20                         | -3.486632999  | -1.450483374  | -0.934034586  |
|  | C21                         | -2.141705708  | -3.019053046  | -2.459528267  |
|  | C22                         | -7.462647515  | -0.518211475  | -2.181590073  |
|  | C23                         | -8.756706503  | -1.155195382  | -2.717682394  |
|  | C24                         | -7.312248467  | 0.969941033   | -2.582590584  |
|  | C25                         | -8.587937757  | 1.761802062   | -2.275499338  |
|  | C26                         | -6.110286579  | 1.608091710   | -1.871482453  |
|  | C27                         | -9.925462792  | -2.153381311  | -4.593102745  |
|  | C28                         | -10.424974286 | -3.348435327  | -3.803353740  |
|  | C29                         | -0.030736164  | -13.182895408 | -2.942530721  |
|  | C30                         | 0.078181607   | -12.418541696 | -1.622749293  |
|  | C31                         | -1.173360800  | -10.842173483 | -0.142658195  |
|  | C32                         | -2.272977721  | -11.498499077 | 0.713299468   |
|  | C33                         | -1.530478003  | -9.393491654  | -0.516600866  |
|  | C34                         | -1.772954922  | -8.499965198  | 0.701284219   |
|  | C35                         | -1.815233660  | -7.022389036  | 0.312961938   |
|  | C36                         | -2.951746233  | -5.278206203  | 1.706872530   |
|  | C37                         | -2.859850169  | -12.328646669 | 2.943265875   |
|  | C38                         | -3.431056898  | -11.382174011 | 3.977149670   |

|      |              |              |              |
|------|--------------|--------------|--------------|
| C39  | 3.010152278  | 1.758816214  | -5.036249930 |
| C40  | 2.145917752  | 2.979274846  | -4.684152415 |
| C41  | 2.839902107  | 0.732477378  | -3.889519388 |
| C42  | 3.368818242  | -0.690627270 | -4.159128758 |
| C43  | 4.832492333  | -0.922937190 | -3.787972057 |
| C44  | 2.221274378  | 5.227727170  | -3.702174755 |
| C45  | 1.516801994  | 6.149180669  | -4.706233573 |
| C46  | 3.186899445  | 6.036481043  | -2.810885474 |
| C47  | 0.735127165  | 6.433012076  | -7.007091362 |
| C48  | -0.693391177 | 5.868212844  | -7.047826535 |
| C49  | -2.222905055 | 4.080327255  | -6.331351038 |
| C50  | -2.963649462 | 4.097513305  | -4.994319478 |
| C51  | -2.907997033 | 4.575967322  | -2.585186945 |
| C52  | -3.983950270 | 5.683717355  | -2.461290427 |
| C53  | -1.894286520 | 4.860887833  | -1.466871610 |
| C54  | -0.779763136 | 3.883268142  | -1.263671209 |
| C55  | -0.602000583 | 2.552518522  | -1.550372531 |
| C56  | 1.177319048  | 3.235403913  | -0.402260269 |
| C57  | -4.482660888 | 8.039774329  | -3.033695322 |
| C58  | -5.935789503 | 7.799025592  | -3.439748033 |
| C59  | -3.827173105 | 9.106350877  | -3.941074753 |
| C60  | -4.117860648 | 10.538977083 | -3.599143579 |
| C61  | -5.287030817 | 11.153886308 | -3.195010435 |
| C62  | -3.644226361 | 12.634424653 | -3.335329377 |
| C63  | -4.968019271 | -5.446350758 | 6.632662518  |
| C64  | -4.487204070 | -6.881693120 | 6.748155692  |
| C65  | -4.411148899 | -4.897605610 | 5.300941851  |
| C66  | -4.869774868 | -3.490920850 | 4.993662443  |
| C67  | -6.058686852 | -3.250466042 | 4.278888128  |
| C68  | -4.107357144 | -2.380233749 | 5.393695468  |
| C69  | -6.470215886 | -1.949090340 | 3.968720537  |
| C70  | -4.508865087 | -1.076693143 | 5.099779772  |
| C71  | -5.690824110 | -0.862180714 | 4.384066080  |
| C72  | -2.327385177 | 2.106610268  | 8.600306075  |
| C73  | -2.269949759 | 3.631985663  | 8.444737398  |
| C74  | -2.066884841 | 1.423490911  | 7.249298614  |
| C75  | -1.012796095 | 5.688873106  | 8.911385313  |
| C76  | -0.578733081 | 6.219071916  | 7.543986430  |
| C77  | 0.278577163  | 5.659193746  | 5.297843843  |
| C78  | -0.905993926 | 5.559437637  | 4.312113361  |
| C79  | 1.484417368  | 4.800082364  | 4.877015710  |
| C80  | 2.082035895  | 5.050479785  | 3.488797003  |
| C81  | 2.861231136  | 6.362835622  | 3.285446653  |
| C82  | 1.797902519  | 8.629587374  | 3.281904177  |
| C83  | -2.957680156 | 4.427154471  | 3.632390548  |
| C84  | -4.140614881 | 5.323433153  | 4.048903668  |
| C85  | -3.473802761 | 2.986809482  | 3.512135357  |
| C86  | -5.495891456 | 6.091008473  | 5.933044648  |
| C87  | -5.677016664 | 7.584650033  | 6.186889215  |
| C88  | -4.682228042 | 9.834530967  | 6.103942425  |
| C89  | -5.369173804 | 10.732929137 | 5.053051893  |
| C90  | -3.256826474 | 10.347923157 | 6.411663223  |
| C91  | -2.345336032 | 10.242751963 | 5.195219803  |
| C92  | -6.194715367 | 10.910878556 | 2.748346906  |
| C93  | -7.625850160 | 11.362674208 | 3.022514669  |
| C94  | -6.147144332 | 10.065292276 | 1.448297268  |
| C95  | -4.731238273 | 9.726097728  | 1.040880684  |
| C96  | -3.958829020 | 10.650499239 | 0.319707075  |
| C97  | -4.133060346 | 8.511952384  | 1.419456136  |
| C98  | -2.626269673 | 10.384882811 | -0.000132899 |
| C99  | -2.793218694 | 8.237603778  | 1.128011285  |
| C100 | -2.053402121 | 9.186420535  | 0.425827253  |
| C101 | 9.287146366  | -3.230874068 | 4.098171184  |
| C102 | 8.912627829  | -2.314698530 | 2.945156527  |
| C103 | 7.301876857  | -0.593665962 | 2.170466392  |
| C104 | 7.303042715  | 0.857172506  | 2.664959265  |
| C105 | 6.296356147  | 2.431541313  | 4.248206358  |
| C106 | 5.848829485  | 2.504659034  | 5.705432094  |
| C107 | 4.864361965  | 1.423739768  | 7.664746576  |
| C108 | 5.905478133  | 1.149521433  | 8.733793862  |
| C109 | 10.038737534 | 1.347555369  | -0.936866149 |
| C110 | 9.448985049  | 2.729627357  | -1.246927430 |
| C111 | 9.035880258  | 0.249032635  | -1.357828749 |

|       |              |               |               |
|-------|--------------|---------------|---------------|
| C112  | 9.710652540  | -1.133863233  | -1.429370057  |
| C113  | 8.674455148  | -2.225954962  | -1.570125221  |
| C114  | 7.931722281  | 4.519526502   | -0.562003255  |
| C115  | 7.924359134  | 5.351292731   | 0.705618715   |
| C116  | 6.562962792  | 4.423170777   | -1.280644275  |
| C117  | 5.674561843  | 3.403752751   | -0.621301444  |
| C118  | 4.941588078  | 3.727402229   | 0.532416589   |
| C119  | 5.685999932  | 2.068579557   | -1.062627015  |
| C120  | 4.305104795  | 2.721253679   | 1.265155235   |
| C121  | 5.045878724  | 1.064214626   | -0.330948925  |
| C122  | 4.384166471  | 1.387360126   | 0.857620479   |
| C123  | 5.770260349  | -8.414684686  | 4.402721414   |
| C124  | 4.762531786  | -9.453628918  | 4.920057954   |
| C125  | 5.608594687  | -8.140482727  | 2.899783302   |
| C126  | 6.419805396  | -7.007126785  | 2.352965509   |
| C127  | 7.792584710  | -6.943153450  | 2.221903805   |
| C128  | 6.878745644  | -5.153494778  | 1.290109715   |
| C129  | 3.602681374  | -11.569339736 | 4.628716242   |
| C130  | 3.931462564  | -12.038218621 | 6.028561392   |
| C131  | 2.875399417  | -5.644739925  | -3.288069448  |
| C132  | 2.388895375  | -6.345195464  | -2.051029511  |
| C133  | 3.552638054  | -6.766100767  | -1.064576559  |
| C134  | 4.578737113  | -7.660570848  | -1.816675565  |
| C135  | 5.647046316  | -8.230944056  | -0.868647448  |
| C136  | 6.495223896  | -9.300864715  | -1.493063183  |
| C137  | 2.899729429  | -7.657325110  | 0.039263344   |
| C138  | 1.875518420  | -2.246802394  | 3.122991799   |
| Fe139 | 3.784849831  | -2.898258500  | 3.156487195   |
| Fe140 | 0.682892825  | -0.469816801  | 2.637121304   |
| Fe141 | 0.526535565  | -2.503649384  | 4.558859261   |
| Fe142 | 2.667446230  | -1.074518279  | 4.515113522   |
| Fe143 | 0.505080119  | 0.223164665   | 5.284363240   |
| Fe144 | 1.611572597  | -4.225650852  | 3.047438433   |
| Fe145 | 2.299808091  | -2.744555344  | 1.003045997   |
| H146  | 3.390950329  | -1.586914904  | -8.754304372  |
| H147  | 4.281738438  | -0.416787632  | -8.042931008  |
| H148  | 2.162449289  | 2.365818800   | -10.430181300 |
| H149  | 4.041767235  | 1.041030089   | -9.922443932  |
| H150  | 3.203789663  | -0.246934087  | -10.783343493 |
| H151  | 0.307647366  | 2.601884678   | -8.308761699  |
| H152  | -0.092056907 | 0.768050902   | -11.351136556 |
| H153  | 0.157819612  | 3.367525363   | -9.911068153  |
| H154  | -1.845459180 | -0.590615370  | -12.038139648 |
| H155  | -0.190986157 | -1.233307207  | -9.589435915  |
| H156  | -2.965244578 | 0.408465782   | -11.080630090 |
| H157  | -1.568311562 | -0.901076472  | -4.634147608  |
| H158  | -0.490176762 | -0.455054384  | -7.275374501  |
| H159  | -0.108668441 | -3.125067027  | -8.216940882  |
| H160  | -5.483417949 | 1.299035918   | -6.101016359  |
| H161  | -3.075320824 | 0.587486651   | -7.575603205  |
| H162  | -1.779936578 | -3.548598761  | -8.658737176  |
| H163  | -1.148406303 | 0.667571535   | -5.363273393  |
| H164  | -4.715445521 | -1.470372467  | -8.325606140  |
| H165  | -5.286608417 | 1.233521629   | -7.873859385  |
| H166  | -2.130203674 | -3.489861189  | -3.453548766  |
| H167  | -1.258993226 | -2.364621267  | -2.386842914  |
| H168  | -2.032881957 | -3.809974738  | -1.703536353  |
| H169  | -3.480566371 | -1.471856178  | -3.072564306  |
| H170  | -6.154876008 | -3.121305772  | -9.040592912  |
| H171  | -5.158462173 | 1.132250041   | -2.146381519  |
| H172  | -7.946433264 | -1.352883436  | -4.623919045  |
| H173  | -9.458913274 | 1.382411882   | -2.827622511  |
| H174  | -2.577842932 | -0.852983218  | -0.786955469  |
| H175  | -3.578957495 | -2.133349942  | -0.078514678  |
| H176  | -6.071741755 | -5.481852798  | 6.547796066   |
| H177  | -6.037025476 | 2.671631584   | -2.141426097  |
| H178  | -8.441565105 | 2.816574067   | -2.552039136  |
| H179  | -6.229183428 | 1.542277079   | -0.777715479  |
| H180  | -8.823075008 | 1.723489869   | -1.200037274  |
| H181  | -7.136220628 | 1.005820602   | -3.673012246  |
| H182  | -7.553844995 | -0.584789497  | -1.086209107  |
| H183  | -5.614223629 | -0.858115145  | -3.222089825  |
| H184  | -4.342930172 | -0.764110025  | -0.905179419  |

|      |               |               |              |
|------|---------------|---------------|--------------|
| H185 | -2.618217667  | 2.312861745   | 3.345833156  |
| H186 | -4.126030742  | 2.952292343   | 2.624337694  |
| H187 | -4.798150122  | 1.885962839   | 4.449520957  |
| H188 | -6.835421860  | 0.466916541   | 3.549571085  |
| H189 | -3.887733877  | -0.229481789  | 5.392610990  |
| H190 | -3.155729874  | -2.534569613  | 5.906795601  |
| H191 | -6.670743582  | -4.092793018  | 3.943297327  |
| H192 | -4.899776151  | -2.988021721  | -4.515184546 |
| H193 | -3.880503624  | -5.747603583  | -5.892927676 |
| H194 | -5.636455079  | -5.982909489  | -5.726425004 |
| H195 | -4.282090947  | -3.516842184  | -6.685633414 |
| H196 | -7.449129080  | -2.452818375  | -8.022778167 |
| H197 | -7.386882512  | -1.782142414  | 3.396848621  |
| H198 | -4.545202239  | -4.009858980  | -1.739311714 |
| H199 | -10.749448699 | -1.428110475  | -4.696255007 |
| H200 | -9.668428657  | -2.513582943  | -5.601414865 |
| H201 | -9.650739630  | -3.871404427  | -3.195155175 |
| H202 | -2.379395068  | -13.180015149 | 3.448623848  |
| H203 | 6.101723475   | -2.339721566  | -3.029519522 |
| H204 | 2.809866349   | -7.347560149  | -4.192700872 |
| H205 | 10.369334498  | -1.169511188  | -2.309394242 |
| H206 | 10.323164083  | -1.304943216  | -0.532489380 |
| H207 | 8.602775188   | 0.484665516   | -2.342669088 |
| H208 | 8.773027213   | 5.140975660   | 1.397849699  |
| H209 | 10.907995537  | 1.282056638   | -1.609393844 |
| H210 | 3.314220656   | 1.142228451   | -2.982472676 |
| H211 | 3.258185729   | -0.940540638  | -5.228319746 |
| H212 | 8.332580423   | 2.699273505   | 0.504942582  |
| H213 | 8.616662799   | 5.070940028   | -1.237814650 |
| H214 | 9.782883052   | 1.197273455   | 1.115889930  |
| H215 | 4.415041842   | -2.843435089  | -3.106214294 |
| H216 | 8.199628143   | 0.239987828   | -0.642649378 |
| H217 | 11.136229411  | 0.450390861   | 0.546958896  |
| H218 | 4.628159012   | 2.282152976   | -6.209873826 |
| H219 | 1.761543499   | 0.656982609   | -3.687592070 |
| H220 | 8.855823400   | -2.575835670  | 0.359805413  |
| H221 | 2.740969186   | -1.412786789  | -3.617392445 |
| H222 | -3.427696637  | 3.622676033   | -2.413054189 |
| H223 | -1.234472553  | 1.841587246   | -2.068574685 |
| H224 | -2.861222695  | 4.600981711   | -7.057493708 |
| H225 | -0.135690414  | 4.222668604   | -5.897487470 |
| H226 | -2.951303063  | 6.779284840   | -3.846176244 |
| H227 | -6.284060243  | 10.774544219  | -2.998967740 |
| H228 | -6.058154874  | 7.072746809   | -4.279643012 |
| H229 | -4.087584268  | 8.893559609   | -4.993552589 |
| H230 | -4.464891958  | 8.366375300   | -1.981894471 |
| H231 | -3.136531366  | 13.594982995  | -3.290082818 |
| H232 | -2.471744928  | 4.922547972   | -0.530027879 |
| H233 | -1.458638330  | 5.860278382   | -1.631330207 |
| H234 | -5.600222563  | 13.218044506  | -2.730827326 |
| H235 | -2.735593311  | 8.983917484   | -3.862961665 |
| H236 | -1.280664353  | 4.743006759   | -3.988953532 |
| H237 | -2.150890062  | 3.034028401   | -6.663107553 |
| H238 | 0.648077530   | 7.510170082   | -6.819180656 |
| H239 | 2.136796086   | 3.227390646   | 0.110740250  |
| H240 | 1.184123520   | 6.299290770   | -8.000400421 |
| H241 | -5.028628194  | -4.898365275  | 8.603559615  |
| H242 | -4.625316044  | -3.676262799  | 7.598598125  |
| H243 | -1.540811152  | 3.759688590   | 5.129970144  |
| H244 | -2.662341479  | 4.762436880   | 2.628070271  |
| H245 | -3.606722322  | 5.155453969   | 6.023043872  |
| H246 | 0.537943176   | 5.260453352   | -0.212426775 |
| H247 | 1.594658377   | 7.022053460   | -0.637913669 |
| H248 | 0.236404835   | 7.537141658   | 0.018252060  |
| H249 | 3.617852816   | 5.373596211   | -2.047584417 |
| H250 | 4.010136684   | 6.443708270   | -3.421968472 |
| H251 | -2.863659208  | 9.777424869   | 7.265879827  |
| H252 | -3.337884764  | 11.404870365  | 6.696437853  |
| H253 | -1.381714045  | 8.523488539   | 5.948794205  |
| H254 | -1.016860640  | 8.976687636   | 4.301761494  |
| H255 | 2.179392712   | 9.924434774   | 4.825157860  |
| H256 | 3.697369911   | 6.195292783   | 2.590395129  |
| H257 | -2.038695455  | 11.107532375  | -0.571831375 |

|      |              |               |              |
|------|--------------|---------------|--------------|
| H258 | -4.712625292 | 7.748242283   | 1.946411906  |
| H259 | 0.329111150  | 9.143157110   | 1.927727642  |
| H260 | 1.194194338  | 3.738349125   | 4.924157985  |
| H261 | -0.132546633 | 4.309430565   | 6.904026677  |
| H262 | 1.311541541  | 4.953455184   | 2.708210170  |
| H263 | 2.201317159  | 5.047924585   | -6.270155912 |
| H264 | -0.258110578 | 6.000359795   | 9.646465996  |
| H265 | 3.880129306  | 3.914482806   | -4.328391270 |
| H266 | 2.269058981  | 4.945739331   | 5.637317830  |
| H267 | -2.327790409 | 7.315493121   | 1.482924254  |
| H268 | 1.844335292  | 7.450653355   | -2.795501008 |
| H269 | -1.953272029 | 6.200937008   | 9.157856333  |
| H270 | 3.312287779  | 8.620995313   | 4.683116908  |
| H271 | 0.884492482  | 10.424090271  | 2.940028215  |
| H272 | 5.028373668  | 1.417628363   | -4.835382557 |
| H273 | 2.553265670  | 1.323455262   | -5.944770392 |
| H274 | -4.403341764 | 11.594581698  | -0.004081238 |
| H275 | 1.397202231  | 4.869618449   | -3.061758779 |
| H276 | 0.553937895  | 6.722598325   | 5.304105131  |
| H277 | 3.307061744  | 6.682916346   | 4.235691689  |
| H278 | 2.788623542  | 4.226955229   | 3.319465479  |
| H279 | 1.610788540  | 7.253032410   | 1.805269215  |
| H280 | -6.316462534 | 5.783606585   | 5.267527264  |
| H281 | -3.815167805 | 7.982612082   | 5.420038586  |
| H282 | -5.288365487 | 9.947345176   | 7.014932435  |
| H283 | -5.645465750 | 5.591187396   | 6.899609458  |
| H284 | -5.408716349 | 9.173038149   | 3.737051863  |
| H285 | 8.958856358  | -2.790424052  | 5.050777519  |
| H286 | 8.697873324  | -4.159784252  | 3.950292856  |
| H287 | 5.546452962  | -7.492844694  | 4.958708009  |
| H288 | 10.948333667 | -4.221564936  | 4.750115204  |
| H289 | 11.040042618 | -3.727954579  | 3.190637061  |
| H290 | -2.048042974 | 0.338266962   | 7.411153127  |
| H291 | -4.363783075 | 2.071874748   | 8.530867846  |
| H292 | -0.474817079 | 3.690350327   | 9.450431198  |
| H293 | -2.883994605 | 1.671799492   | 6.556605687  |
| H294 | -3.771977753 | 2.033473657   | 10.055462703 |
| H295 | 4.051929005  | 0.686112124   | 7.759353642  |
| H296 | -1.551480362 | 1.785673519   | 9.313080519  |
| H297 | -2.418671457 | -9.401316167  | -1.170684239 |
| H298 | -0.222589907 | -10.848123715 | 0.404208031  |
| H299 | 5.283133829  | 0.497775637   | 5.799793075  |
| H300 | -3.577212469 | -3.771549332  | 2.950442851  |
| H301 | 7.273271517  | 2.929103718   | 4.181599461  |
| H302 | 5.070700364  | 0.026737212   | -0.672278315 |
| H303 | 5.588996620  | 3.059873281   | 3.680627866  |
| H304 | -2.625202024 | -6.818609962  | -0.400554930 |
| H305 | 5.734234346  | 0.361227452   | 3.868077698  |
| H306 | -0.874993031 | -6.735460295  | -0.185035284 |
| H307 | -0.687795104 | -9.000831323  | -1.108698776 |
| H308 | -0.961856566 | -8.632228952  | 1.433375308  |
| H309 | -2.715828754 | -8.775402408  | 1.201231016  |
| H310 | 6.754006119  | 4.148699196   | -2.328507144 |
| H311 | -1.752238220 | -11.720922768 | -2.023016149 |
| H312 | 0.677425029  | -12.699901489 | -3.632997542 |
| H313 | 3.921455561  | 0.615179850   | 1.469702272  |
| H314 | -1.925885325 | -13.947299177 | -3.204001824 |
| H315 | -1.321316809 | -13.227017339 | -4.545132789 |
| H316 | -1.137268145 | -6.053951052  | 2.078583776  |
| H317 | 3.755245921  | 2.954438859   | 2.177217376  |
| H318 | 6.215681927  | 1.806571153   | -1.981476881 |
| H319 | 4.233267406  | -11.790781081 | 1.061039714  |
| H320 | 5.885748972  | -9.053828663  | 2.343722126  |
| H321 | 2.457698109  | -10.174501790 | 0.652951636  |
| H322 | 5.639554264  | -11.592998849 | 0.451079692  |
| H323 | 6.944357153  | 0.988858608   | 8.356594180  |
| H324 | 1.613504530  | -7.699881259  | 2.381046710  |
| H325 | 1.800651796  | -7.238083247  | -2.308690520 |
| H326 | 7.298006361  | -1.631900227  | 4.008886679  |
| H327 | 4.036150881  | -8.486596809  | -2.302606464 |
| H328 | 8.974803410  | -5.434636916  | 1.264072662  |
| H329 | 6.794786849  | -4.222446031  | 0.743721876  |
| H330 | 0.359761620  | -14.196893934 | -2.750379367 |

|       |              |               |               |
|-------|--------------|---------------|---------------|
| H331  | -1.911337499 | -4.314173141  | 3.206730730   |
| H332  | 0.602975563  | -9.750799767  | 3.153623693   |
| H333  | 0.828169451  | -7.190644057  | 3.620807730   |
| H334  | -1.025133680 | -11.352613936 | 2.372751337   |
| H335  | -4.350940151 | -6.131260479  | 0.473251644   |
| H336  | 7.689119250  | -9.627953576  | -2.924016288  |
| H337  | 6.293695221  | -7.406559032  | -0.532913936  |
| H338  | 5.183416784  | -8.678929928  | 0.017460877   |
| H339  | 5.067068631  | -7.056640085  | -2.595501090  |
| H340  | 6.277730527  | -0.917025579  | 1.926329804   |
| H341  | 4.915455035  | 4.764617673   | 0.873093622   |
| H342  | 6.113819059  | 5.427625165   | -1.265638554  |
| H343  | 1.755442619  | -5.641582904  | -1.494403583  |
| H344  | 1.274212542  | -10.926775946 | 2.396339250   |
| H345  | 1.981571056  | -11.630493340 | 0.371505821   |
| H346  | -4.835393428 | -4.666606484  | 1.213826909   |
| H347  | 8.572840789  | -7.622329289  | 2.543373585   |
| H348  | 4.551680738  | -7.948412059  | 2.679249090   |
| H349  | 7.921994815  | -0.644561099  | 1.273480505   |
| H350  | 4.433810117  | 2.419102252   | 7.858352112   |
| H351  | -4.736406442 | -5.580265818  | 4.501409008   |
| H352  | -3.311328180 | -4.931229205  | 5.344703640   |
| H353  | 7.237365516  | -8.906844459  | 5.750870231   |
| H354  | 7.345234209  | -9.738440448  | 4.345469074   |
| H355  | 3.690086193  | -12.442863224 | 3.962957643   |
| H356  | 4.930090761  | -10.670580861 | 3.223346356   |
| H357  | 5.008344351  | -11.957780682 | 6.311802808   |
| H358  | 2.557064121  | -11.224828907 | 4.589223889   |
| H359  | -3.472539686 | -6.997085880  | 7.200571506   |
| H360  | -8.170850685 | 10.765507047  | 3.791532764   |
| H361  | -3.710899162 | -12.712499835 | 2.353143108   |
| H362  | -3.512412479 | -10.316193632 | 3.652410768   |
| H363  | -5.589606617 | 11.820603329  | 2.604064467   |
| H364  | -6.737067618 | 9.146631649   | 1.593963229   |
| H365  | -6.642215888 | 10.653101416  | 0.661779494   |
| H366  | 2.203959846  | -2.866099526  | -0.513033901  |
| H367  | -0.339227087 | 9.624850635   | -0.392867861  |
| H368  | 0.700229853  | -0.819532302  | -0.210912488  |
| H369  | 1.009708371  | 1.236687694   | -0.944709298  |
| Mo370 | 3.632106804  | -5.046384375  | 1.417422629   |
| N371  | -1.198489476 | -3.064088964  | 0.681786460   |
| N372  | -1.115367954 | -1.965821635  | 0.835136287   |
| N373  | 4.037200410  | -0.818193782  | -8.951629993  |
| N374  | 1.546255368  | 1.818043551   | -9.834911483  |
| N375  | -0.911523066 | 0.749883413   | -10.748982229 |
| N376  | -1.063547597 | -1.740032520  | -9.445899767  |
| N377  | -1.203171155 | -0.917830444  | -6.710115683  |
| N378  | -3.708700696 | 0.414971248   | -6.791905085  |
| N379  | -5.557580409 | -1.596866996  | -7.757921722  |
| N380  | -5.079717362 | -4.115644483  | -6.448644283  |
| N381  | -4.797443623 | -3.654473257  | -3.752668332  |
| N382  | -6.285729287 | -1.288639059  | -2.584609358  |
| N383  | -8.734449544 | -1.569033667  | -4.010346608  |
| N384  | -1.376096685 | -13.148929316 | -3.528782293  |
| N385  | -0.985262886 | -11.639867779 | -1.346673955  |
| N386  | -1.965182319 | -6.155111299  | 1.483809286   |
| N387  | -4.069067773 | -5.272834536  | 0.936244676   |
| N388  | -2.803082107 | -4.365237661  | 2.666482988   |
| N389  | -1.948325968 | -11.682586160 | 2.017272350   |
| N390  | 4.409292878  | 2.155318851   | -5.219952909  |
| N391  | 5.128274433  | -2.131172986  | -3.274719301  |
| N392  | 2.859114531  | 4.067538593   | -4.289342422  |
| N393  | 1.600893409  | 5.827504790   | -6.012415740  |
| N394  | -0.913523281 | 4.710528594   | -6.357048991  |
| N395  | -2.275950708 | 4.554109711   | -3.900536887  |
| N396  | 0.350142445  | 4.278003115   | -0.553781990  |
| N397  | 0.617481139  | 2.187187586   | -1.015088387  |
| N398  | -3.724750799 | 6.801802895   | -3.186050380  |
| N399  | -3.098930528 | 11.474439680  | -3.682757351  |
| N400  | -4.964244134 | 12.484275558  | -3.031073857  |
| N401  | -4.475011509 | -4.673540208  | 7.773307742   |
| N402  | -3.629650615 | 1.656011659   | 9.113997754   |
| N403  | -1.194902005 | 4.254089244   | 9.006266313   |

|      |               |               |              |
|------|---------------|---------------|--------------|
| N404 | -0.096284751  | 5.313382098   | 6.665358173  |
| N405 | 2.045846287   | 7.447216839   | 2.723979608  |
| N406 | 2.440745611   | 9.046553775   | 4.388296601  |
| N407 | 0.822108199   | 9.422125188   | 2.778633210  |
| N408 | -1.791899391  | 4.545122336   | 4.504789334  |
| N409 | -4.227974900  | 5.646774847   | 5.372160514  |
| N410 | -4.674211574  | 8.413160658   | 5.767252048  |
| N411 | -1.590721456  | 9.112213965   | 5.133101282  |
| N412 | -5.666102141  | 10.148247857  | 3.867149903  |
| N413 | 10.739706190  | -3.438741955  | 4.126049787  |
| N414 | 7.863653272   | -1.498668250  | 3.163527607  |
| N415 | 6.414004908   | 1.117128458   | 3.644716274  |
| N416 | 5.398827017   | 1.379222679   | 6.315363588  |
| N417 | 10.550022827  | 1.280454998   | 0.437645131  |
| N418 | 8.584093998   | 3.244311477   | -0.327056555 |
| N419 | 7.152907940   | -8.809872862  | 4.734962021  |
| N420 | 5.864616082   | -5.869503653  | 1.769777097  |
| N421 | 8.059405683   | -5.769174995  | 1.551074866  |
| N422 | 4.539374050   | -10.561654427 | 4.159147275  |
| N423 | -1.053916098  | 1.602173198   | 1.510147961  |
| N424 | -0.390905402  | 0.798205455   | 1.958188782  |
| O425 | 1.330957202   | 0.021045468   | -8.457132547 |
| O426 | -1.912488613  | 1.583007361   | -8.877942344 |
| O427 | -3.323934649  | -1.734375563  | -9.783371498 |
| O428 | -2.448949370  | -2.787051140  | -6.347140340 |
| O429 | -3.932335934  | -0.019314802  | -4.569858537 |
| O430 | -7.065621207  | -0.640309175  | -6.329541477 |
| O431 | -7.240249871  | -4.715573315  | -6.937326020 |
| O432 | -4.542595271  | -5.893588533  | -3.287940811 |
| O433 | -6.709268761  | -2.968817448  | -1.100221592 |
| O434 | -9.765592418  | -1.287557417  | -2.005906723 |
| O435 | -11.574876664 | -3.755675797  | -3.865693582 |
| O436 | 1.105203918   | -12.533801213 | -0.921115115 |
| O437 | -3.362478465  | -11.824647952 | 0.209798646  |
| O438 | -3.799047729  | -11.738234645 | 5.085239625  |
| O439 | 0.898007772   | 2.967538967   | -4.739120829 |
| O440 | 5.706073861   | -0.043496016  | -3.969934291 |
| O441 | 0.849403960   | 7.115654584   | -4.279783365 |
| O442 | 2.497358391   | 7.098862446   | -2.135818992 |
| O443 | -1.560293370  | 6.463084510   | -7.698237822 |
| O444 | -4.135868839  | 3.721932553   | -4.927380951 |
| O445 | -4.930886260  | 5.573891401   | -1.677716004 |
| O446 | -6.892010967  | 8.362010308   | -2.936194716 |
| O447 | -5.126375725  | -7.849604751  | 6.361113678  |
| O448 | -6.031405964  | 0.445741277   | 4.100389007  |
| O449 | -3.154612271  | 4.274505503   | 7.849568614  |
| O450 | -0.657251978  | 7.444529985   | 7.318842458  |
| O451 | -1.024082121  | 6.397783150   | 3.401252539  |
| O452 | -4.979400513  | 5.673763862   | 3.207246821  |
| O453 | -4.201753380  | 2.625113283   | 4.689389097  |
| O454 | -6.707361831  | 7.997439317   | 6.734702514  |
| O455 | -5.632834257  | 11.915757974  | 5.307607309  |
| O456 | -2.366824406  | 11.088427722  | 4.287129280  |
| O457 | -8.154101525  | 12.286127622  | 2.425305973  |
| O458 | -0.693660159  | 8.918439567   | 0.181249200  |
| O459 | 9.548614379   | -2.362390425  | 1.860910060  |
| O460 | 8.084466057   | 1.714774590   | 2.197552181  |
| O461 | 5.881930781   | 3.612048388   | 6.269840733  |
| O462 | 5.642813280   | 1.098807208   | 9.924338913  |
| O463 | 9.729959671   | 3.327761856   | -2.299346505 |
| O464 | 8.112005294   | -2.491215666  | -2.629145330 |
| O465 | 8.342281230   | -2.891913689  | -0.448106425 |
| O466 | 7.102274156   | 6.220378170   | 0.959724777  |
| O467 | 4.228065167   | -9.337987951  | 6.038564077  |
| O468 | 3.111080365   | -12.544534979 | 6.780680349  |
| O469 | 3.126343190   | -4.452077644  | -3.382804422 |
| O470 | 3.057116207   | -6.426374426  | -4.401732778 |
| O471 | 6.594400022   | -10.458845575 | -1.093486775 |
| O472 | 7.176502546   | -8.863388850  | -2.585004676 |
| O473 | 3.021739712   | -7.221666771  | 1.250310985  |
| O474 | 2.350510045   | -8.740181074  | -0.272033454 |
| O475 | 4.162080836   | -5.654858501  | -0.520795365 |
| O476 | 0.547347201   | -10.733146298 | 3.045349073  |

|      |              |               |             |
|------|--------------|---------------|-------------|
| O477 | 0.853146354  | -7.923544914  | 2.973824992 |
| O478 | 0.969782961  | 6.882003104   | 0.128487863 |
| O479 | 5.169643758  | -12.103809140 | 1.141942406 |
| O480 | 2.475377965  | -11.096285379 | 1.044790704 |
| S481 | -0.477388114 | 1.947181396   | 6.459508267 |
| S482 | 2.048422391  | 0.946223529   | 3.823414035 |
| S483 | 4.503584384  | -2.861883968  | 1.022883796 |
| S484 | -1.058637190 | -0.956945883  | 4.084748008 |
| S485 | 1.783823546  | -0.561679921  | 0.572868625 |
| S486 | 4.842378260  | -1.574439350  | 4.620795122 |
| S487 | 1.330138405  | -4.723965259  | 0.888918472 |
| S488 | 1.515204882  | -1.484285378  | 6.378755621 |
| S489 | 3.551606084  | -5.038381353  | 3.803603229 |
| S490 | -0.086865875 | -4.654148429  | 4.396777198 |

**Atomic coordinates and electronic state for the structure with promotional N<sub>2</sub> at exo-Fe2 and reactive N<sub>2</sub> within the N<sub>2</sub> channel, shown in Fig7(b).**

| <b>S, spin densities</b> | <b>filename, coordinates</b>               |
|--------------------------|--------------------------------------------|
| S=3/2                    | bm22b2n2x6x6n2ncnxdisd 1 53315.23          |
| Fe( 139) 0.541 2.397     | C1 -2.379492949 -9.022593629 -1.692399375  |
| Fe( 140) 0.413 1.111     | C2 -1.371055473 -9.929417135 -2.407261593  |
| Fe( 141) 0.577 2.782     | C3 -4.724015750 -8.311764924 -1.524995901  |
| Fe( 142) 0.517 -2.427    | C4 -4.932861563 -8.467114695 -0.020028958  |
| Fe( 143) 0.521 2.354     | C5 -4.862589185 -9.931112236 1.934870013   |
| Fe( 144) 0.501 -2.267    | C6 -3.818521097 -9.195642385 2.782589627   |
| Fe( 145) 0.364 -1.224    | C7 -1.556682657 -8.256431254 2.870701625   |
|                          | C8 -1.834684335 -6.748651637 2.858836584   |
|                          | C9 -2.683301558 -4.831233329 1.604500825   |
|                          | C10 -3.852837522 -4.432040443 2.514944184  |
|                          | C11 -5.933600514 -5.068466983 3.590724518  |
|                          | C12 -5.570987683 -5.194031610 5.080438989  |
|                          | C13 -4.658019226 -6.646212478 6.834148035  |
|                          | C14 -3.404860167 -6.076962750 7.515599211  |
|                          | C15 -1.046173340 -5.420802435 7.265118492  |
|                          | C16 -0.655723662 -3.974291738 6.943888449  |
|                          | C17 -1.298080623 -1.959193207 5.624907188  |
|                          | C18 -2.414717159 -1.029526461 6.143244860  |
|                          | C19 -1.120147317 -1.938612600 4.090343248  |
|                          | C20 -1.205708927 -0.511637921 3.547834130  |
|                          | C21 0.205627901 -2.586968912 3.677885299   |
|                          | C22 -4.783500085 -0.371685319 6.034943135  |
|                          | C23 -5.296428997 -0.701857382 7.447744484  |
|                          | C24 -5.903941550 -0.416300968 4.966083763  |
|                          | C25 -7.141129894 0.374822096 5.406310270   |
|                          | C26 -5.391528583 0.113634712 3.620080192   |
|                          | C27 -6.045399113 -2.394940312 9.016916623  |
|                          | C28 -5.231668426 -1.844731799 10.171589223 |
|                          | C29 8.412258201 -5.943854058 8.694468911   |
|                          | C30 8.397968546 -4.541734417 8.091834890   |
|                          | C31 7.001380606 -2.473649865 7.986817895   |
|                          | C32 7.085122724 -1.544811560 9.214983221   |
|                          | C33 5.612362817 -2.439164435 7.329801028   |
|                          | C34 5.221993299 -1.044106767 6.848049945   |
|                          | C35 4.024898258 -1.086435223 5.900546807   |
|                          | C36 2.590909048 0.949201015 5.583930702    |
|                          | C37 8.106122536 0.483951034 10.136724890   |
|                          | C38 7.409960257 1.815413926 9.952155028    |
|                          | C39 -1.153647780 -5.001733010 -3.257397515 |
|                          | C40 -2.428800200 -4.157044221 -3.422854744 |
|                          | C41 -0.115720904 -4.145519615 -2.493901578 |
|                          | C42 1.125675455 -4.895447129 -1.963315771  |
|                          | C43 2.300923098 -4.964549437 -2.933450138  |
|                          | C44 -3.663659132 -2.744015821 -5.005683169 |
|                          | C45 -5.091360340 -3.309689331 -5.066338870 |
|                          | C46 -3.340017065 -1.940056545 -6.280848228 |
|                          | C47 -6.540704126 -5.219249110 -4.566549066 |
|                          | C48 -7.021365004 -5.046170559 -3.118165227 |
|                          | C49 -6.421223739 -4.437684462 -0.809480781 |
|                          | C50 -6.446575189 -2.993262786 -0.305263324 |



|      |               |              |              |
|------|---------------|--------------|--------------|
| C51  | -5.906534817  | -0.633939684 | -0.701347651 |
| C52  | -7.321432392  | -0.004550376 | -0.626843427 |
| C53  | -5.121943827  | 0.254621485  | -1.680380600 |
| C54  | -3.673329697  | -0.045190698 | -1.891241479 |
| C55  | -2.702419169  | -0.668859633 | -1.147672115 |
| C56  | -1.731474901  | 0.139983165  | -2.976577728 |
| C57  | -9.493880057  | 0.135155121  | -1.803896934 |
| C58  | -10.354370179 | 0.038614821  | -0.541936563 |
| C59  | -10.153314857 | -0.619286942 | -2.981247679 |
| C60  | -11.233600162 | 0.116476855  | -3.718113450 |
| C61  | -12.260598132 | 0.918837118  | -3.261377688 |
| C62  | -12.324803870 | 0.767284977  | -5.471762656 |
| C63  | 3.098240681   | 6.058891546  | 7.180160516  |
| C64  | 4.454903416   | 5.704147393  | 7.764934538  |
| C65  | 2.614575502   | 4.810192660  | 6.407483363  |
| C66  | 1.223175960   | 4.962507874  | 5.832557533  |
| C67  | 0.078621038   | 4.615878265  | 6.574914612  |
| C68  | 1.037740396   | 5.470116702  | 4.533886298  |
| C69  | -1.204322619  | 4.757979237  | 6.036439092  |
| C70  | -0.235239855  | 5.629087036  | 3.990841825  |
| C71  | -1.356150732  | 5.282190538  | 4.747710922  |
| C72  | 0.035064303   | 9.117745901  | 0.105668861  |
| C73  | -1.081395577  | 9.338185510  | -0.925860462 |
| C74  | 0.241352491   | 7.613677411  | 0.347036574  |
| C75  | -1.632484410  | 9.982362541  | -3.233319627 |
| C76  | -2.229797627  | 8.719814075  | -3.855153421 |
| C77  | -2.073338464  | 6.264162734  | -4.080973923 |
| C78  | -3.052325180  | 5.603582737  | -3.087363197 |
| C79  | -0.865893944  | 5.368770852  | -4.415072562 |
| C80  | -1.150920717  | 3.978278496  | -4.996768464 |
| C81  | -1.707295973  | 3.918961902  | -6.430207042 |
| C82  | -3.981195596  | 4.704863741  | -7.117145032 |
| C83  | -3.699637382  | 5.185508837  | -0.773643857 |
| C84  | -4.923613811  | 6.071432802  | -0.464642417 |
| C85  | -3.019627666  | 4.857034131  | 0.557873155  |
| C86  | -5.674426568  | 8.346831133  | 0.003140045  |
| C87  | -6.752536011  | 9.009401699  | -0.846880755 |
| C88  | -7.802320578  | 9.229772347  | -3.061703672 |
| C89  | -9.224462390  | 8.629368849  | -3.099793737 |
| C90  | -7.206728661  | 9.302009036  | -4.486784516 |
| C91  | -6.994572675  | 7.915258808  | -5.081197862 |
| C92  | -10.649781758 | 6.713369307  | -2.522142401 |
| C93  | -11.738773176 | 7.443445127  | -1.745266393 |
| C94  | -10.451287547 | 5.281001631  | -1.959934851 |
| C95  | -9.488446531  | 4.465693313  | -2.798246251 |
| C96  | -9.931473694  | 3.841606970  | -3.975733857 |
| C97  | -8.125235736  | 4.366533868  | -2.467358749 |
| C98  | -9.048273726  | 3.147707799  | -4.806051314 |
| C99  | -7.222317703  | 3.692466310  | -3.298471931 |
| C100 | -7.696262085  | 3.099374418  | -4.466898824 |
| C101 | 9.357558314   | 0.812874854  | -5.043034147 |
| C102 | 8.082457410   | 0.042202096  | -5.332188025 |
| C103 | 5.604486681   | 0.121016845  | -5.206703160 |
| C104 | 4.728278452   | 0.937429756  | -6.162204121 |
| C105 | 3.518417800   | 3.039696410  | -6.480443575 |
| C106 | 3.663774051   | 4.536961775  | -6.223454588 |
| C107 | 4.553266293   | 6.365871451  | -4.864623123 |
| C108 | 5.784398285   | 7.029144101  | -5.449107085 |
| C109 | 4.803190595   | -3.009889769 | -8.424279047 |
| C110 | 3.345964508   | -2.825808401 | -8.866431669 |
| C111 | 4.847794623   | -3.420036671 | -6.935497386 |
| C112 | 6.233571435   | -3.968122921 | -6.548055908 |
| C113 | 6.353027728   | -4.109102577 | -5.045519598 |
| C114 | 1.383968510   | -1.367369685 | -8.923180244 |
| C115 | 1.226344123   | 0.030352665  | -9.491460984 |
| C116 | 0.370049764   | -1.731593930 | -7.805455391 |
| C117 | 0.801902327   | -1.165306645 | -6.477137716 |
| C118 | 0.534441527   | 0.171810486  | -6.141561306 |
| C119 | 1.612365360   | -1.928888385 | -5.620161795 |
| C120 | 1.129081369   | 0.747373655  | -5.014774953 |
| C121 | 2.208457682   | -1.352800966 | -4.495133117 |
| C122 | 1.984596353   | -0.004625507 | -4.203945509 |
| C123 | 11.010809646  | 0.711442466  | 1.060092550  |

|       |              |               |              |
|-------|--------------|---------------|--------------|
| C124  | 11.319775613 | 1.186341984   | 2.489481453  |
| C125  | 10.221956703 | -0.608935173  | 1.039397314  |
| C126  | 9.701650089  | -1.042955860  | -0.295864423 |
| C127  | 10.435998688 | -1.500795003  | -1.371766890 |
| C128  | 8.273570427  | -1.668775888  | -1.825165340 |
| C129  | 12.050624216 | 0.674541943   | 4.749322801  |
| C130  | 13.066236414 | 1.795075984   | 4.773103016  |
| C131  | 4.646821806  | -5.112356625  | 1.621075234  |
| C132  | 5.275504783  | -4.011729950  | 2.431374347  |
| C133  | 6.620272173  | -3.466649895  | 1.807455226  |
| C134  | 7.632374235  | -4.634626079  | 1.635613355  |
| C135  | 9.016384009  | -4.145717192  | 1.181497047  |
| C136  | 10.086901485 | -5.198989626  | 1.249330504  |
| C137  | 7.224516703  | -2.489273714  | 2.857680132  |
| C138  | 3.834884531  | 1.976001554   | -0.043153249 |
| Fe139 | 5.457985162  | 1.326700924   | -1.044803515 |
| Fe140 | 1.694268745  | 2.347565177   | -0.347560268 |
| Fe141 | 3.776067924  | 3.667566896   | 1.000209454  |
| Fe142 | 4.005466663  | 3.322473561   | -1.525951601 |
| Fe143 | 2.105914302  | 5.000330522   | -0.912507602 |
| Fe144 | 5.037314248  | 1.517973080   | 1.486610933  |
| Fe145 | 3.657679026  | -0.172912739  | 0.080226396  |
| H146  | 0.248341125  | -9.420492412  | -1.277952361 |
| H147  | 0.201283487  | -8.663028059  | -2.724835135 |
| H148  | -3.895154215 | -9.742240322  | -2.883451939 |
| H149  | -1.632773111 | -9.989357717  | -3.475876419 |
| H150  | -1.522382273 | -10.943692066 | -1.998754341 |
| H151  | -4.496096702 | -7.250734726  | -1.693765763 |
| H152  | -4.455549462 | -10.464209000 | -0.112070999 |
| H153  | -5.667007733 | -8.549412670  | -2.034755581 |
| H154  | -4.772764827 | -11.008463683 | 2.123378045  |
| H155  | -2.470883734 | -9.273082156  | 1.234510551  |
| H156  | -5.847996480 | -9.599392232  | 2.284962099  |
| H157  | -1.834250078 | -4.195783472  | 1.891503582  |
| H158  | -2.400926174 | -6.837864298  | 0.871958902  |
| H159  | -0.601871236 | -8.449054332  | 2.363579873  |
| H160  | -6.289364198 | -4.043686888  | 3.430469498  |
| H161  | -4.829977465 | -6.218608652  | 2.145164758  |
| H162  | -1.458941278 | -8.557348473  | 3.920713915  |
| H163  | -2.939115549 | -4.613638285  | 0.557069415  |
| H164  | -4.654810360 | -7.019550675  | 4.733740991  |
| H165  | -6.756234918 | -5.763682310  | 3.369848216  |
| H166  | 0.289116534  | -3.615912610  | 4.052560069  |
| H167  | 0.286417289  | -2.618688704  | 2.578906116  |
| H168  | 1.064815558  | -2.005733394  | 4.051174097  |
| H169  | -1.941858073 | -2.525444899  | 3.645952784  |
| H170  | -4.603178190 | -7.742391273  | 6.912319507  |
| H171  | -4.541547207 | -0.468754660  | 3.237733480  |
| H172  | -5.420327677 | -2.734082195  | 7.004528305  |
| H173  | -7.575146064 | -0.004946631  | 6.342609729  |
| H174  | -0.952606130 | -0.487417642  | 2.475321779  |
| H175  | -0.500241204 | 0.152470467   | 4.073635855  |
| H176  | 2.405730983  | 6.216887143   | 8.030825610  |
| H177  | -6.193186676 | 0.067704187   | 2.868101641  |
| H178  | -7.913675143 | 0.313737188   | 4.625309842  |
| H179  | -5.078817077 | 1.166455584   | 3.715175652  |
| H180  | -6.893419389 | 1.438103587   | 5.556254806  |
| H181  | -6.198990097 | -1.473390472  | 4.837223317  |
| H182  | -4.401600490 | 0.656338327   | 6.114508695  |
| H183  | -3.815018014 | -1.916602518  | 4.898537933  |
| H184  | -2.215037451 | -0.093038786  | 3.659940402  |
| H185  | -2.079388227 | 4.322094399   | 0.358816929  |
| H186  | -3.692431080 | 4.180185596   | 1.103283493  |
| H187  | -2.724898948 | 5.796820068   | 2.255928204  |
| H188  | -3.291116793 | 5.100470251   | 4.738013200  |
| H189  | -0.356485330 | 5.999535788   | 2.973983221  |
| H190  | 1.908466312  | 5.703461452   | 3.918355724  |
| H191  | 0.186645869  | 4.216101883   | 7.587142755  |
| H192  | -2.308942058 | -3.841560675  | 5.775171866  |
| H193  | -0.234125577 | -6.060359091  | 6.891430219  |
| H194  | -1.082498692 | -5.521894898  | 8.357673612  |
| H195  | -2.335803577 | -6.139619598  | 5.733151071  |
| H196  | -5.514004327 | -6.301394657  | 7.429618156  |

|      |               |              |               |
|------|---------------|--------------|---------------|
| H197 | -2.082716398  | 4.465052409  | 6.617646303   |
| H198 | -0.380502532  | -1.597246529 | 6.106585026   |
| H199 | -7.096054837  | -2.087628899 | 9.144560942   |
| H200 | -6.002207361  | -3.492619710 | 9.090336594   |
| H201 | -4.158330610  | -1.650920479 | 9.942587984   |
| H202 | 9.181834375   | 0.656067798  | 10.283007825  |
| H203 | 4.347880978   | -4.885071860 | -3.001806847  |
| H204 | 5.558256285   | -6.370823369 | 2.765387491   |
| H205 | 6.370960645   | -4.962129157 | -7.000463801  |
| H206 | 7.022469394   | -3.303674954 | -6.928052487  |
| H207 | 4.089838683   | -4.192145122 | -6.733654303  |
| H208 | 2.137137779   | 0.418111643  | -10.005493284 |
| H209 | 5.147202311   | -3.870982934 | -9.017856004  |
| H210 | 0.200850764   | -3.314702549 | -3.146042129  |
| H211 | 0.855318095   | -5.931975068 | -1.697729327  |
| H212 | 3.304615543   | -0.901191593 | -8.086533331  |
| H213 | 1.168090173   | -2.032111991 | -9.785460701  |
| H214 | 5.466633317   | -1.054366013 | -8.202339130  |
| H215 | 3.667268486   | -4.662810967 | -1.393512633  |
| H216 | 4.582943698   | -2.548207133 | -6.316995842  |
| H217 | 6.619119042   | -2.103936346 | -8.737617700  |
| H218 | -0.974309762  | -6.390765910 | -4.774050654  |
| H219 | -0.636904778  | -3.701684427 | -1.632593498  |
| H220 | 7.364595368   | -2.423683134 | -5.021354345  |
| H221 | 1.452193127   | -4.421398701 | -1.026344028  |
| H222 | -5.487650569  | -0.563907460 | 0.312897519   |
| H223 | -2.752064530  | -1.174895298 | -0.191469251  |
| H224 | -7.424325963  | -4.850680429 | -0.639720181  |
| H225 | -5.112192591  | -4.493812540 | -2.495883973  |
| H226 | -7.924598997  | -1.292856411 | -2.099151038  |
| H227 | -12.546666107 | 1.244428219  | -2.268925644  |
| H228 | -10.168455382 | -0.885641431 | 0.063221341   |
| H229 | -10.514144418 | -1.599520627 | -2.624154693  |
| H230 | -9.368359519  | 1.200937237  | -2.055924879  |
| H231 | -12.669485720 | 0.925567804  | -6.491348502  |
| H232 | -5.213339525  | 1.287774556  | -1.306391750  |
| H233 | -5.634000733  | 0.235137470  | -2.657507233  |
| H234 | -13.753832609 | 1.935194962  | -4.409958926  |
| H235 | -9.364334810  | -0.829120632 | -3.718944727  |
| H236 | -5.398850074  | -2.311483330 | -1.948698395  |
| H237 | -5.727181850  | -5.007846973 | -0.173917462  |
| H238 | -7.302405010  | -4.765254147 | -5.214016010  |
| H239 | -0.970459831  | 0.394044282  | -3.710960861  |
| H240 | -6.505797090  | -6.293752884 | -4.789878003  |
| H241 | 3.327224668   | 8.064797470  | 6.845152789   |
| H242 | 2.373723498   | 7.324437161  | 5.745961399   |
| H243 | -1.860018767  | 6.094643841  | -1.463807278  |
| H244 | -4.101946557  | 4.247892782  | -1.185164702  |
| H245 | -3.823132143  | 7.764702938  | -0.831392482  |
| H246 | -3.514381405  | 0.948672759  | -3.821391384  |
| H247 | -4.279285609  | 0.717857634  | -5.762562628  |
| H248 | -5.256241801  | 1.779408459  | -5.093326756  |
| H249 | -2.345476727  | -1.485933178 | -6.179043777  |
| H250 | -3.333497597  | -2.609009589 | -7.157919150  |
| H251 | -6.268488171  | 9.872652078  | -4.442286219  |
| H252 | -7.923895783  | 9.844487826  | -5.116442423  |
| H253 | -4.919650744  | 7.968997762  | -4.701013749  |
| H254 | -5.585195316  | 6.447298697  | -5.243386658  |
| H255 | -4.158663750  | 6.315314730  | -8.369930647  |
| H256 | -1.324408038  | 3.025532726  | -6.944316911  |
| H257 | -9.413022392  | 2.662015345  | -5.713592092  |
| H258 | -7.742246198  | 4.813297194  | -1.543613162  |
| H259 | -5.706570903  | 3.917766226  | -6.303971598  |
| H260 | -0.266527308  | 5.226684614  | -3.500912007  |
| H261 | -0.790433669  | 7.548650120  | -2.954482451  |
| H262 | -1.801779935  | 3.400375329  | -4.322011895  |
| H263 | -4.403326696  | -5.199051668 | -4.767717810  |
| H264 | -1.135745813  | 10.550136902 | -4.031718437  |
| H265 | -1.924337212  | -4.055242652 | -5.356802235  |
| H266 | -0.230410316  | 5.926480112  | -5.123199053  |
| H267 | -6.156654498  | 3.678935639  | -3.058476037  |
| H268 | -5.168911730  | -1.269585910 | -6.214183055  |
| H269 | -2.479578103  | 10.584699663 | -2.874665222  |

|      |               |              |              |
|------|---------------|--------------|--------------|
| H270 | -2.577577891  | 5.615812016  | -8.319159419 |
| H271 | -5.940114466  | 5.026748686  | -7.603813539 |
| H272 | 0.376411383   | -5.428352256 | -4.564582185 |
| H273 | -1.445091011  | -5.841172773 | -2.597740319 |
| H274 | -10.989060307 | 3.889076354  | -4.248200190 |
| H275 | -3.708705345  | -2.028077111 | -4.167053715 |
| H276 | -2.668698470  | 6.452917036  | -4.983698111 |
| H277 | -1.347578695  | 4.783293327  | -7.002103606 |
| H278 | -0.182781164  | 3.458093039  | -5.003434867 |
| H279 | -3.609815047  | 3.064003988  | -5.985006630 |
| H280 | -6.196466673  | 7.822899268  | 0.816957744  |
| H281 | -6.193499300  | 7.914390153  | -2.491086528 |
| H282 | -7.938310624  | 10.258667153 | -2.697367357 |
| H283 | -5.082094007  | 9.154820224  | 0.452018751  |
| H284 | -8.586073770  | 7.023119499  | -2.014059281 |
| H285 | 9.164981285   | 1.893559000  | -5.102428259 |
| H286 | 9.611095158   | 0.591452574  | -3.985215348 |
| H287 | 10.389253718  | 1.502429082  | 0.614569910  |
| H288 | 11.302144009  | 0.788380095  | -5.659068396 |
| H289 | 10.474606268  | -0.577206508 | -6.023176193 |
| H290 | 1.078835068   | 7.481508172  | 1.044028679  |
| H291 | -1.211244937  | 9.514562972  | 1.672636815  |
| H292 | 0.309487338   | 9.878161994  | -2.340002603 |
| H293 | -0.670654379  | 7.190166079  | 0.793665156  |
| H294 | -0.294684088  | 10.796105484 | 1.237105618  |
| H295 | 4.567894180   | 6.486498357  | -3.770262919 |
| H296 | 0.974088598   | 9.545411339  | -0.282515230 |
| H297 | 4.870666016   | -2.829061732 | 8.046989410  |
| H298 | 7.758840484   | -2.182772465 | 7.249191700  |
| H299 | 4.858387365   | 4.289470515  | -4.533865093 |
| H300 | 1.679658655   | 2.730607998  | 5.166092292  |
| H301 | 3.759162569   | 2.869499232  | -7.539652744 |
| H302 | 2.858314593   | -1.947400774 | -3.849772992 |
| H303 | 2.446367001   | 2.806415109  | -6.364128571 |
| H304 | 3.136379796   | -1.516613041 | 6.382166696  |
| H305 | 4.527852119   | 2.323075213  | -4.683006543 |
| H306 | 4.249650634   | -1.724779110 | 5.030643043  |
| H307 | 5.647882221   | -3.138648026 | 6.479843945  |
| H308 | 6.061339857   | -0.584738786 | 6.304992416  |
| H309 | 4.991335495   | -0.391208105 | 7.705095629  |
| H310 | 0.310107595   | -2.828955071 | -7.757379662 |
| H311 | 6.667389991   | -4.309782318 | 9.059900791  |
| H312 | 8.240714229   | -6.641108594 | 7.860084151  |
| H313 | 2.475782058   | 0.471384209  | -3.355759547 |
| H314 | 7.736944605   | -5.895620849 | 10.640680458 |
| H315 | 7.117106452   | -7.134983155 | 9.766382451  |
| H316 | 4.343919457   | 0.608236265  | 4.661273719  |
| H317 | 0.958558204   | 1.794657497  | -4.757285257 |
| H318 | 1.800060103   | -2.978851219 | -5.852528503 |
| H319 | 11.370198549  | -2.871903744 | 4.493186804  |
| H320 | 10.874939688  | -1.411719534 | 1.423167448  |
| H321 | 8.991932929   | -2.427070784 | 4.792553405  |
| H322 | 11.865829581  | -3.747499430 | 3.320464151  |
| H323 | 6.368276875   | 6.401930655  | -6.166504447 |
| H324 | 7.276176594   | 0.002257562  | 3.788329059  |
| H325 | 5.464187069   | -4.341550964 | 3.464906806  |
| H326 | 6.975218212   | 1.597889682  | -4.586263865 |
| H327 | 7.726543881   | -5.157340584 | 2.600941774  |
| H328 | 9.725651523   | -2.303696751 | -3.229587205 |
| H329 | 7.362043991   | -1.913510915 | -2.358387437 |
| H330 | 9.441905583   | -6.121419508 | 9.048389912  |
| H331 | 3.087520963   | 2.379385377  | 4.180023088  |
| H332 | 8.420139532   | 0.470389258  | 5.842557058  |
| H333 | 6.922661979   | 1.500559225  | 3.994832251  |
| H334 | 8.315636811   | -0.261904572 | 8.127234592  |
| H335 | 1.932861381   | -0.153061320 | 7.182103695  |
| H336 | 10.559674964  | -6.909618085 | 0.588395359  |
| H337 | 8.943330375   | -3.781154805 | 0.146394385  |
| H338 | 9.362082165   | -3.314163221 | 1.806466510  |
| H339 | 7.234874659   | -5.340230480 | 0.893516829  |
| H340 | 5.144263835   | 0.065786376  | -4.206997538 |
| H341 | -0.103865308  | 0.768882359  | -6.795754409 |
| H342 | -0.611178460  | -1.345383602 | -8.122771447 |

|       |               |              |              |
|-------|---------------|--------------|--------------|
| H343  | 4.581285994   | -3.160356217 | 2.442359746  |
| H344  | 9.412191256   | -0.690553439 | 6.119117902  |
| H345  | 9.662132673   | -2.932383933 | 6.101522789  |
| H346  | 0.908551190   | 1.140382946  | 6.741517541  |
| H347  | 11.505553399  | -1.587501581 | -1.524916728 |
| H348  | 9.375065905   | -0.529981092 | 1.731276427  |
| H349  | 5.706969222   | -0.884429873 | -5.619464202 |
| H350  | 3.667833333   | 6.893786236  | -5.250764141 |
| H351  | 2.648809863   | 3.958575235  | 7.104176744  |
| H352  | 3.332415509   | 4.609686211  | 5.596140349  |
| H353  | 12.701081176  | 1.537096368  | 0.236540764  |
| H354  | 12.911186192  | -0.009998002 | 0.723366045  |
| H355  | 12.506914474  | -0.187708196 | 5.261903278  |
| H356  | 11.739550966  | -0.742996398 | 3.186833576  |
| H357  | 13.745153254  | 1.832865379  | 3.887661496  |
| H358  | 11.155787289  | 0.966541482  | 5.321748288  |
| H359  | 5.314712719   | 5.883718269  | 7.076913156  |
| H360  | -11.371692727 | 8.169614181  | -0.980781931 |
| H361  | 7.705129089   | 0.032940937  | 11.059807120 |
| H362  | 6.496643334   | 1.788536564  | 9.312075271  |
| H363  | -10.987424713 | 6.644817422  | -3.569331721 |
| H364  | -10.097472784 | 5.346158196  | -0.919498364 |
| H365  | -11.438583688 | 4.797526451  | -1.941154401 |
| H366  | 3.176320265   | -1.590784396 | 0.316437183  |
| H367  | -7.253621643  | 1.999689050  | -6.014823895 |
| H368  | 0.846630714   | -0.396692770 | 0.274268422  |
| H369  | -0.563230275  | -0.768276401 | -1.516844775 |
| Mo370 | 6.248100235   | -0.736360260 | 0.567392132  |
| N371  | -2.629395403  | 2.809266041  | 2.954560103  |
| N372  | -1.760316586  | 2.196959009  | 2.632466893  |
| N373  | 0.028478848   | -9.561338844 | -2.267345465 |
| N374  | -3.679005316  | -9.162882127 | -2.076497102 |
| N375  | -4.722096231  | -9.700432312 | 0.504275968  |
| N376  | -2.593209494  | -9.041160875 | 2.218872682  |
| N377  | -2.318686048  | -6.238494130 | 1.695726321  |
| N378  | -4.827749686  | -5.356480848 | 2.693853252  |
| N379  | -4.870133500  | -6.305078471 | 5.434262771  |
| N380  | -2.317301984  | -5.867172810 | 6.721524819  |
| N381  | -1.507343071  | -3.316906588 | 6.117632072  |
| N382  | -3.669911626  | -1.240744384 | 5.649645650  |
| N383  | -5.500873912  | -2.014568889 | 7.726296437  |
| N384  | 7.378517610   | -6.149306441 | 9.717153610  |
| N385  | 7.307058811   | -3.826879345 | 8.418203771  |
| N386  | 3.705959636   | 0.243995019  | 5.374727319  |
| N387  | 1.664847236   | 0.520032722  | 6.473442712  |
| N388  | 2.361906038   | 2.045591578  | 4.850893104  |
| N389  | 7.868511907   | -0.449803924 | 9.051151469  |
| N390  | -0.660071570  | -5.441279369 | -4.565384224 |
| N391  | 3.525471077   | -4.819145308 | -2.393125215 |
| N392  | -2.639530386  | -3.718030671 | -4.691634584 |
| N393  | -5.244472736  | -4.632701099 | -4.849954326 |
| N394  | -6.088416459  | -4.630374834 | -2.211711736 |
| N395  | -5.939574130  | -2.025948733 | -1.135708668 |
| N396  | -3.036338395  | 0.439839106  | -3.027946225 |
| N397  | -1.518844757  | -0.543854600 | -1.847483074 |
| N398  | -8.194319308  | -0.478182369 | -1.553236400 |
| N399  | -11.286050274 | 0.029302583  | -5.100568570 |
| N400  | -12.942192318 | 1.323100897  | -4.390643288 |
| N401  | 3.233406080   | 7.211532544  | 6.289383083  |
| N402  | -0.264579488  | 9.782328307  | 1.384508381  |
| N403  | -0.684952954  | 9.772029217  | -2.155790862 |
| N404  | -1.583951633  | 7.558299038  | -3.615916448 |
| N405  | -3.172676129  | 3.857608269  | -6.485695544 |
| N406  | -3.509853026  | 5.674490896  | -7.924587222 |
| N407  | -5.316055229  | 4.657955538  | -6.890741350 |
| N408  | -2.786897905  | 5.752557147  | -1.760621324 |
| N409  | -4.771224706  | 7.414445777  | -0.656171044 |
| N410  | -6.892822334  | 8.565822617  | -2.131710551 |
| N411  | -5.747374327  | 7.398492627  | -4.913936319 |
| N412  | -9.394191738  | 7.445724188  | -2.463674511 |
| N413  | 10.403329182  | 0.444514365  | -6.004278287 |
| N414  | 6.935179509   | 0.702098217  | -5.086582772 |
| N415  | 4.329950718   | 2.133905994  | -5.686318519 |

|      |               |              |              |
|------|---------------|--------------|--------------|
| N416 | 4.449922990   | 4.956877687  | -5.198683839 |
| N417 | 5.629207578   | -1.861192193 | -8.817255471 |
| N418 | 2.773154082   | -1.620828437 | -8.588137195 |
| N419 | 12.247769905  | 0.618585264  | 0.258805742  |
| N420 | 8.345913900   | -1.148263398 | -0.603352098 |
| N421 | 9.517702373   | -1.891975888 | -2.323010305 |
| N422 | 11.732899123  | 0.256181914  | 3.394554696  |
| N423 | -1.238217778  | 2.223815385  | -0.369229883 |
| N424 | -0.109421007  | 2.304838595  | -0.335461694 |
| O425 | -2.052018341  | -8.244752184 | -0.776385341 |
| O426 | -5.293433238  | -7.501927099 | 0.672937946  |
| O427 | -4.093827293  | -8.801951594 | 3.927628269  |
| O428 | -1.634605074  | -6.042581840 | 3.859453942  |
| O429 | -3.889047270  | -3.312352931 | 3.048023417  |
| O430 | -5.940724487  | -4.340903620 | 5.905086540  |
| O431 | -3.415367175  | -5.877267288 | 8.738038572  |
| O432 | 0.384232636   | -3.490245933 | 7.412784877  |
| O433 | -2.168775102  | -0.146921574 | 6.976117926  |
| O434 | -5.516832962  | 0.184656659  | 8.289372305  |
| O435 | -5.686744583  | -1.681337578 | 11.293688331 |
| O436 | 9.336511238   | -4.169743710 | 7.355258862  |
| O437 | 6.478271164   | -1.821138002 | 10.264553691 |
| O438 | 7.795442332   | 2.851553713  | 10.469257145 |
| O439 | -3.198149733  | -3.892898931 | -2.473740554 |
| O440 | 2.134366377   | -5.161690706 | -4.158691025 |
| O441 | -6.047641487  | -2.525895327 | -5.243721402 |
| O442 | -4.292511424  | -0.881297312 | -6.474057943 |
| O443 | -8.197487171  | -5.296725365 | -2.833182486 |
| O444 | -6.928497731  | -2.727465272 | 0.797928767  |
| O445 | -7.577803002  | 0.924936115  | 0.143506308  |
| O446 | -11.198200916 | 0.857917174  | -0.220451066 |
| O447 | 4.616252649   | 5.232041104  | 8.881107568  |
| O448 | -2.589420915  | 5.449178069  | 4.158078496  |
| O449 | -2.281807017  | 9.143804404  | -0.657700437 |
| O450 | -3.247560829  | 8.827634700  | -4.569147226 |
| O451 | -4.040234809  | 4.982251271  | -3.515120890 |
| O452 | -5.960110757  | 5.557147525  | -0.020736882 |
| O453 | -2.785457818  | 6.049068983  | 1.311034369  |
| O454 | -7.472163854  | 9.888397414  | -0.356571347 |
| O455 | -10.146629575 | 9.225584267  | -3.674103046 |
| O456 | -7.924006368  | 7.276140331  | -5.597994874 |
| O457 | -12.929270908 | 7.239694939  | -1.918277541 |
| O458 | -6.765012133  | 2.468960503  | -5.311255332 |
| O459 | 8.134402910   | -1.144490415 | -5.746989975 |
| O460 | 4.436966485   | 0.520620384  | -7.305469299 |
| O461 | 3.037834389   | 5.315262655  | -6.962371281 |
| O462 | 6.125643196   | 8.167631622  | -5.171791739 |
| O463 | 2.716019134   | -3.745982630 | -9.412891342 |
| O464 | 5.850121167   | -5.036303396 | -4.416975243 |
| O465 | 7.013004235   | -3.132607126 | -4.395332212 |
| O466 | 0.192428653   | 0.681725878  | -9.450234568 |
| O467 | 11.272775881  | 2.393055048  | 2.794597279  |
| O468 | 13.203075012  | 2.563281906  | 5.715311294  |
| O469 | 3.898232211   | -4.962951981 | 0.666063165  |
| O470 | 4.965067833   | -6.396493459 | 1.990204161  |
| O471 | 11.114876032  | -5.133311167 | 1.919701464  |
| O472 | 9.815002454   | -6.281064718 | 0.474483686  |
| O473 | 7.374494301   | -1.269355101 | 2.465905423  |
| O474 | 7.574079171   | -2.913722851 | 3.984741185  |
| O475 | 6.363720169   | -2.826740138 | 0.612616228  |
| O476 | 9.058441289   | 0.144751317  | 6.525642418  |
| O477 | 7.165569654   | 0.693772790  | 4.490644903  |
| O478 | -4.302233992  | 1.551348479  | -5.213208830 |
| O479 | 12.190432717  | -3.109207189 | 3.989447533  |
| O480 | 9.802457483   | -2.285117326 | 5.362680236  |
| S481 | 0.601583151   | 6.678262117  | -1.214991027 |
| S482 | 1.960181264   | 3.359767431  | -2.419942228 |
| S483 | 5.056492569   | -0.836166170 | -1.493191793 |
| S484 | 1.572577482   | 4.146740070  | 1.096504066  |
| S485 | 1.574636215   | 0.010860974  | -0.793197899 |
| S486 | 5.715415712   | 2.699627637  | -2.793222978 |
| S487 | 4.411848640   | -0.533387920 | 2.119611897  |
| S488 | 4.301952827   | 5.301201814  | -0.542671265 |

|  |      |             |             |             |
|--|------|-------------|-------------|-------------|
|  | S489 | 7.054999100 | 1.504537927 | 0.535421474 |
|  | S490 | 4.789159807 | 3.174906576 | 2.940508052 |
